# Supplementary material for: Molecular Profiling of Axial Spondyloarthritis Patients Reveals an Association between Innate and Adaptive Cell Populations and Therapeutic Response to Tumor Necrosis Factor Inhibitors
Source: MDPI journal article supplement (doi:10.3390/biom14030382), 2024-03-21

## Supplemental Figure 2

Group: ● BL NR ● BL R ● W14 NR ● W14 R

### Proteomics: Baseline versus Week 14

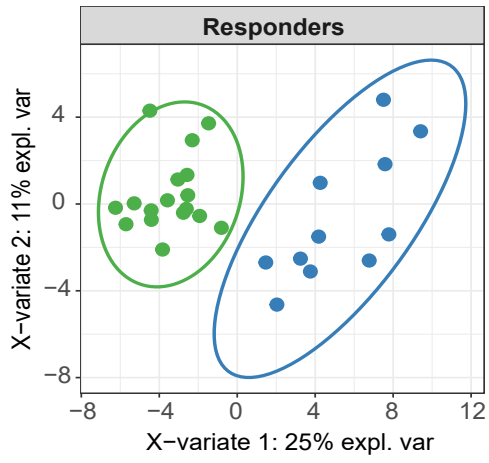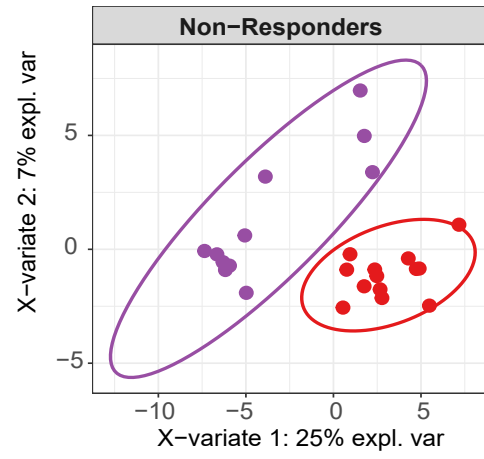

Supplement: s1 [file s1]
