# Supplementary material for: Molecular Profiling of Axial Spondyloarthritis Patients Reveals an Association between Innate and Adaptive Cell Populations and Therapeutic Response to Tumor Necrosis Factor Inhibitors
Source: MDPI journal article supplement (doi:10.3390/biom14030382), 2024-03-21

**A** Up-regulated genes in W14 vs BL

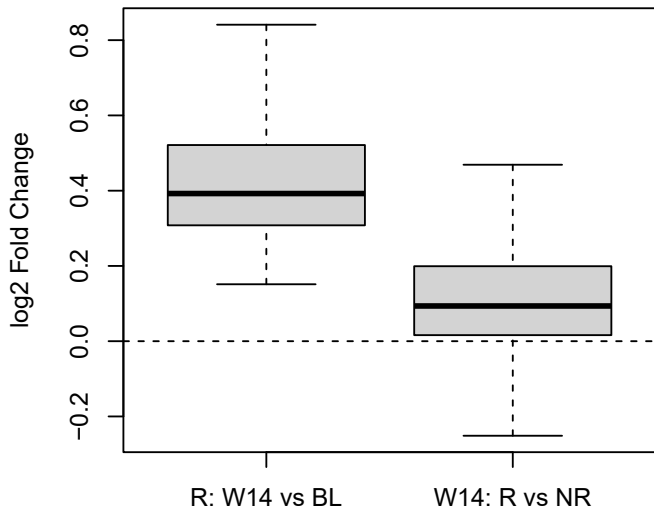

**B** Down-regulated genes in W14 vs BL

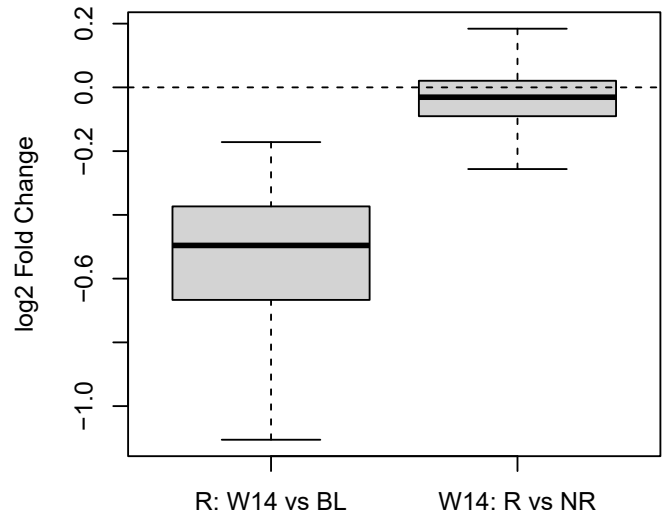

**C** Up-regulated proteins in W14 vs BL

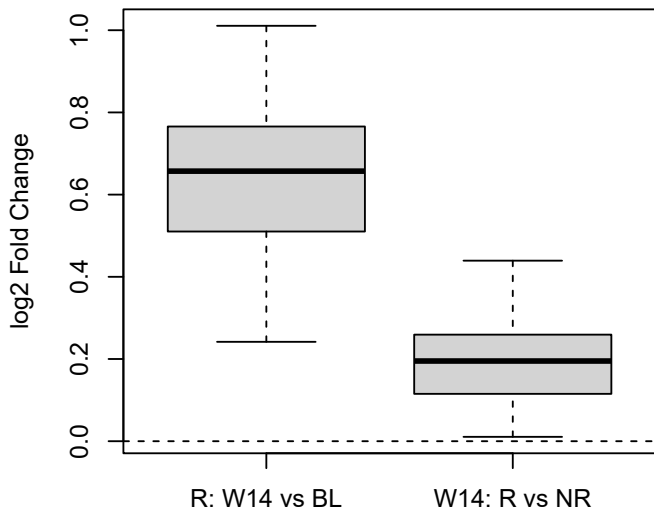

**D** Down-regulated proteins in W14 vs BL

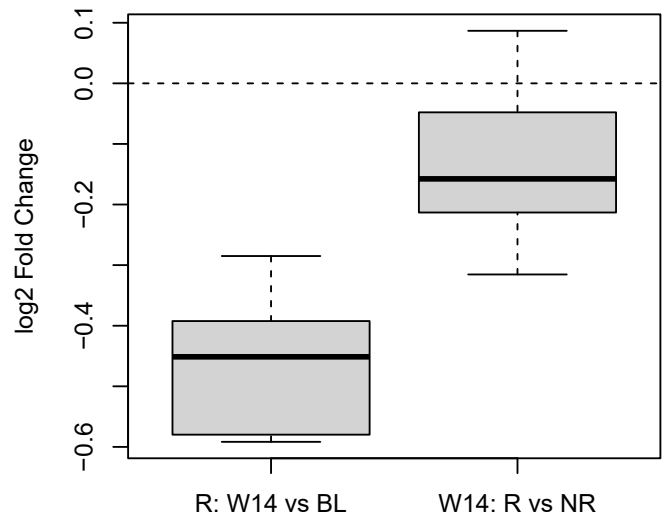

Supplement: s1 [file s1]
