# Supplementary material for: Molecular Profiling of Axial Spondyloarthritis Patients Reveals an Association between Innate and Adaptive Cell Populations and Therapeutic Response to Tumor Necrosis Factor Inhibitors
Source: MDPI journal article supplement (doi:10.3390/biom14030382), 2024-03-21

W14 versus BL in Non-Responders

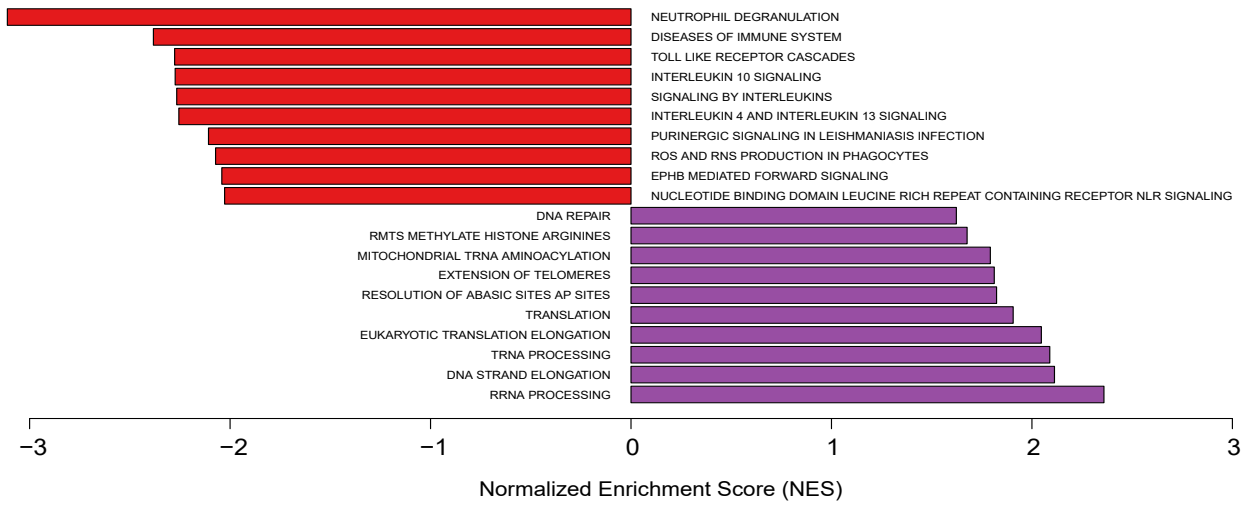

Supplement: s1 [file s1]
