# Supplementary material for: Molecular Profiling of Axial Spondyloarthritis Patients Reveals an Association between Innate and Adaptive Cell Populations and Therapeutic Response to Tumor Necrosis Factor Inhibitors
Source: Biomolecules. 2024 Mar 21;14(3):382. doi: 10.3390/biom14030382 (PMC10967957; doi:10.3390/biom14030382)
Supplement: Supplementary file 1 [file biomolecules-14-00382-s001.zip]

Archive with 22 entries (22 files):
- SuppFig1.pdf
- SuppFig2.pdf
- SuppFig3.pdf
- SuppFig4.pdf
- SuppFig5.pdf
- SuppFig6.pdf
- SuppFig7.pdf
- SuppFig8.pdf
- SuppFig9.pdf
- SuppMethods.pdf
- SuppTable1.xlsx
- SuppTable10.xlsx
- SuppTable11.xlsx
- SuppTable12.xlsx
- SuppTable2.xlsx
- SuppTable3.xlsx
- SuppTable4.xlsx
- SuppTable5.xlsx
- SuppTable6.xlsx
- SuppTable7.xlsx
- SuppTable8.xlsx
- SuppTable9.xlsx
