# Supplementary material for: Molecular Profiling of Axial Spondyloarthritis Patients Reveals an Association between Innate and Adaptive Cell Populations and Therapeutic Response to Tumor Necrosis Factor Inhibitors
Source: Biomolecules. 2024 Mar 21;14(3):382. doi: 10.3390/biom14030382 (PMC10967957; doi:10.3390/biom14030382)
Supplement: Supplementary file 1 [file biomolecules-14-00382-s001.zip › SuppTable1.xlsx]

## Sheet: Transcriptomics Responders
logfc: Log2 of the Fold change
AveExpr: Log2 of the average normalized expression CPM among all samples
t: t-statistic of the differential expression test
P.value: p value of the differential expression test
adj.P.Val: p-value correctedfor multiple testing
B: B-statistic (log-odds that the gene is differentially expressed)
	logFC	AveExpr	t	P.Value	adj.P.Val	B
NUCKS1	0.485887	5.54194	5.41643	8.37863e-07	0.00413017	5.60832
NTNG2	-0.878765	5.21395	-5.36178	1.03748e-06	0.00413017	5.40905
LINC01531	-0.942858	1.1613	-5.30883	1.27526e-06	0.00413017	4.85913
PLIN4	-0.942384	3.99661	-5.30024	1.31859e-06	0.00413017	5.18284
HTATSF1	0.488225	4.45847	5.26225	1.52811e-06	0.00413017	5.04631
RRM1	0.54433	3.33265	5.23861	1.67469e-06	0.00413017	4.93893
NBEAL2	-0.554141	8.51298	-5.23268	1.71354e-06	0.00413017	4.92737
PRPS1	0.377761	4.31334	5.22713	1.75078e-06	0.00413017	4.91968
AL133216.2	-0.773965	3.8838	-5.20755	1.88838e-06	0.00413017	4.84851
AP5B1	-0.67941	7.19909	-5.19236	2.00244e-06	0.00413017	4.79389
IL1RN	-0.839514	5.71972	-5.15511	2.31152e-06	0.00413017	4.66168
ABCB7	0.379986	3.10501	5.15507	2.31188e-06	0.00413017	4.6343
SLC26A8	-1.0495	2.54591	-5.13331	2.51362e-06	0.00414515	4.53907
TP53I11	-0.900715	5.70472	-5.09452	2.91681e-06	0.00427226	4.44494
SET	0.311077	6.94039	5.06154	3.30905e-06	0.00427226	4.32861
BCL3	-0.769126	5.79655	-5.05455	3.39866e-06	0.00427226	4.30254
TTC4	0.355426	3.25496	5.0434	3.54644e-06	0.00427226	4.25171
DOK3	-0.788069	7.41889	-5.04041	3.58712e-06	0.00427226	4.25327
EIF4B	0.387716	8.13075	4.92936	5.46875e-06	0.00575154	3.86255
HLA-DOA	0.696543	4.68559	4.91884	5.69043e-06	0.00575154	3.82561
BANK1	0.983884	4.55499	4.86769	6.9002e-06	0.00575154	3.64849
PLIN5	-0.793863	3.9711	-4.8329	7.86307e-06	0.00575154	3.52673
LINC01001	-0.903287	7.30082	-4.82892	7.98147e-06	0.00575154	3.51377
NATD1	-0.737388	6.10688	-4.82219	8.18525e-06	0.00575154	3.48598
AL732372.3	-0.961458	5.87963	-4.80161	8.84046e-06	0.00575154	3.41394
CYP2U1	0.608975	1.90478	4.80057	8.87489e-06	0.00575154	3.28908
NLRX1	-0.680779	4.3949	-4.79781	8.96693e-06	0.00575154	3.40238
LINC01002	-0.92329	7.66113	-4.79472	9.07095e-06	0.00575154	3.39633
SH3BP5L	-0.512395	6.03366	-4.78795	9.30335e-06	0.00575154	3.36671
TFE3	-0.548465	6.51894	-4.78675	9.34498e-06	0.00575154	3.36481
NFE2	-0.70839	7.40241	-4.78316	9.47133e-06	0.00575154	3.356
AC004263.2	-0.521968	4.0593	-4.77225	9.86475e-06	0.00575154	3.31647
OSCAR	-0.665755	5.46006	-4.77082	9.91762e-06	0.00575154	3.30552
MRM3	0.361138	2.58408	4.75761	1.04179e-05	0.00575154	3.2436
GLOD4	0.428536	4.50856	4.74433	1.09456e-05	0.00575154	3.21858
PHAX	0.358977	3.71966	4.7426	1.10163e-05	0.00575154	3.21791
ST3GAL2	-0.524803	6.31403	-4.74202	1.10401e-05	0.00575154	3.2091
FAM20A	-1.39405	0.429443	-4.73511	1.13273e-05	0.00575154	2.76524
TRPM4	-0.666031	2.62119	-4.73429	1.13618e-05	0.00575154	3.17615
SLC25A44	-0.550019	5.7614	-4.72794	1.16332e-05	0.00575154	3.15799
PXN-AS1	-0.569162	1.8173	-4.72751	1.16519e-05	0.00575154	3.08404
NLRP12	-0.751972	6.33768	-4.72623	1.17074e-05	0.00575154	3.15477
FAM157A	-0.910361	8.50079	-4.72325	1.18376e-05	0.00575154	3.15181
CYBC1	-0.379859	7.78957	-4.71654	1.21361e-05	0.00575154	3.1283
FAM214B	-0.607273	5.72353	-4.70502	1.26657e-05	0.00575154	3.07887
HNRNPA1	0.364559	8.56411	4.70389	1.2719e-05	0.00575154	3.08602
IPO5	0.439388	4.93745	4.70003	1.2902e-05	0.00575154	3.06344
AL359762.1	-0.843806	1.52982	-4.69257	1.32635e-05	0.00575154	2.91567
MYD88	-0.522067	7.44335	-4.69119	1.33314e-05	0.00575154	3.04048
TLR5	-0.721992	3.82751	-4.68756	1.35115e-05	0.00575154	3.02821
TDRD3	0.4101	2.72232	4.68416	1.36826e-05	0.00575154	3.00267
MRPL19	0.404256	3.12223	4.67408	1.42023e-05	0.00585515	2.98069
PHF21A	-0.51315	6.29115	-4.66524	1.46736e-05	0.00593532	2.94479
NOL10	0.368519	2.89195	4.64957	1.55469e-05	0.00607513	2.89442
LPAR2	-0.692174	6.19585	-4.64889	1.5586e-05	0.00607513	2.88918
SLC2A3	-0.704902	7.48685	-4.64196	1.59889e-05	0.0061209	2.87292
AL669831.1	-0.807035	7.52079	-4.6219	1.72138e-05	0.00647421	2.80542
USB1	-0.518289	5.98385	-4.60778	1.81306e-05	0.00670145	2.74726
RERE-AS1	-0.690486	1.33145	-4.58917	1.94112e-05	0.00705317	2.57403
AC011498.4	-0.942586	0.838702	-4.57796	2.02249e-05	0.00712217	2.42185
TMUB2	-0.370789	5.33609	-4.57742	2.02655e-05	0.00712217	2.6417
TRIM25	-0.592554	7.44117	-4.56422	2.12678e-05	0.00728551	2.61002
GALNS	-0.417197	4.6295	-4.56044	2.15637e-05	0.00728551	2.58719
UBE3A	0.447267	4.52136	4.55809	2.17498e-05	0.00728551	2.58394
RAN	0.457416	5.55795	4.5484	2.2533e-05	0.00735054	2.54468
ZDHHC3	-0.315786	5.4171	-4.54723	2.26297e-05	0.00735054	2.53945
EBNA1BP2	0.451454	3.22523	4.543	2.29817e-05	0.00735346	2.54486
LRPPRC	0.464904	4.93657	4.53648	2.35342e-05	0.00737195	2.50671
ADGRG3	-0.914257	6.98558	-4.53365	2.37781e-05	0.00737195	2.50405
ANAPC16	0.31127	5.92736	4.52818	2.42568e-05	0.00737195	2.47723
AC079414.2	-0.741759	1.58515	-4.52572	2.44754e-05	0.00737195	2.41412
POLR3GL	0.468295	3.51986	4.52046	2.49481e-05	0.00737195	2.46851
GTPBP4	0.308775	4.06762	4.51877	2.51027e-05	0.00737195	2.45637
CSF3R	-0.682494	11.087	-4.50667	2.62318e-05	0.0075162	2.41279
AP003065.2	-0.614669	2.13464	-4.506	2.62951e-05	0.0075162	2.39367
YIPF1	-0.421887	4.44151	-4.50024	2.68519e-05	0.00757434	2.38581
NPL	-0.660134	6.3002	-4.48081	2.8813e-05	0.00785045	2.32084
RBBP7	0.29527	5.0717	4.47862	2.90423e-05	0.00785045	2.31002
NAP1L1	0.428227	7.20626	4.47493	2.94337e-05	0.00785045	2.30805
SLC11A1	-0.804206	7.98696	-4.47308	2.96315e-05	0.00785045	2.30884
CCT6A	0.341964	5.35696	4.4728	2.96616e-05	0.00785045	2.28975
LRP10	-0.641548	8.58268	-4.46884	3.00901e-05	0.00786672	2.29771
AL627309.6	-0.858166	6.43597	-4.45801	3.12921e-05	0.00808242	2.24591
SLC22A4	-0.795385	4.0154	-4.44677	3.25892e-05	0.00819806	2.21343
WEE1	0.6203	2.01994	4.44483	3.28187e-05	0.00819806	2.1663
C1RL	-0.567997	5.67027	-4.44425	3.28871e-05	0.00819806	2.19396
GMIP	-0.478759	7.55128	-4.4397	3.34314e-05	0.00822498	2.19456
RASGRP4	-0.677232	6.93491	-4.43615	3.38631e-05	0.00822498	2.17743
HIST2H2BE	-0.81207	4.19608	-4.43384	3.41461e-05	0.00822498	2.16608
MBD6	-0.540468	6.48128	-4.42781	3.48972e-05	0.00831251	2.14489
CD1C	0.805785	2.73336	4.42177	3.5664e-05	0.00840181	2.13564
DARS	0.421333	4.36337	4.40758	3.75335e-05	0.00869976	2.08187
AGTRAP	-0.559437	6.21719	-4.40605	3.77404e-05	0.00869976	2.07083
RNF24	-0.683876	7.36387	-4.40263	3.82068e-05	0.0087136	2.06991
ZIK1	0.564398	1.77295	4.3953	3.92266e-05	0.008852	1.97826
FLOT2	-0.597235	8.41988	-4.38435	4.07988e-05	0.00909323	2.01847
UBTD1	-0.72961	3.07422	-4.382	4.11439e-05	0.00909323	2.01473
ARID3B	-0.395878	4.98904	-4.37737	4.18338e-05	0.00915136	1.97096
MCTP2	-0.584861	5.56106	-4.36811	4.32441e-05	0.00936431	1.9398
GLO1	0.442433	3.82999	4.35703	4.49939e-05	0.00964579	1.92558
DDX18	0.356117	5.1237	4.35029	4.60916e-05	0.00978327	1.88296
CR1	-0.762743	6.10513	-4.34463	4.70323e-05	0.00980182	1.8654
RPL7	1.53983	6.50876	4.3437	4.71891e-05	0.00980182	1.86807
SPATC1	-1.5909	-2.25969	-4.34156	4.75518e-05	0.00980182	0.0468211
ZBTB7B	-0.428386	7.07801	-4.33888	4.80078e-05	0.00980182	1.85682
PBDC1	0.495158	2.3248	4.33317	4.89959e-05	0.00987956	1.84554
INTS10	0.300885	4.46955	4.33138	4.93102e-05	0.00987956	1.82695
RPL3	0.604945	9.5335	4.32728	5.00358e-05	0.0099321	1.83787
GTF2IP13	-0.667403	3.95904	-4.32443	5.05466e-05	0.00994146	1.80949
MME	-0.842521	7.57676	-4.31721	5.18638e-05	0.00995969	1.79137
FKBP9	-0.721801	1.61336	-4.31677	5.19449e-05	0.00995969	1.75258
WDR77	0.313013	3.79528	4.30932	5.33415e-05	0.00995969	1.76874
FBL	0.488811	5.9658	4.30745	5.36961e-05	0.00995969	1.74307
ELP2	0.352406	4.47452	4.30374	5.44092e-05	0.00995969	1.73782
CACYBP	0.384164	4.35885	4.30221	5.47059e-05	0.00995969	1.73406
ST3GAL4	-0.696594	4.28667	-4.30219	5.47099e-05	0.00995969	1.7315
GTPBP1	-0.360475	5.80868	-4.29727	5.56757e-05	0.00995969	1.708
TSC22D4	-0.470575	7.20632	-4.29578	5.59713e-05	0.00995969	1.7177
ADCY4	-0.563947	2.53506	-4.28956	5.72216e-05	0.00995969	1.7172
ARSG	-0.322526	4.33151	-4.28681	5.77824e-05	0.00995969	1.68047
RPL22	0.437197	6.43317	4.2862	5.79067e-05	0.00995969	1.67753
PDCD7	0.307935	3.93353	4.28337	5.84916e-05	0.00995969	1.68145
TTC27	0.514912	2.44819	4.2825	5.8673e-05	0.00995969	1.68614
APEX1	0.390396	5.5571	4.28237	5.86984e-05	0.00995969	1.65866
DIS3L2	0.317805	3.13491	4.27594	6.00524e-05	0.00995969	1.6729
YPEL3	-0.611879	7.98679	-4.27293	6.0696e-05	0.00995969	1.65179
UNC13D	-0.451682	7.48759	-4.27018	6.12913e-05	0.00995969	1.63738
CEACAM3	-0.752062	6.03154	-4.26929	6.14844e-05	0.00995969	1.61828
AC245884.11	-0.867292	0.969823	-4.26852	6.16526e-05	0.00995969	1.51669
PDHA1	0.264823	4.31213	4.26769	6.18336e-05	0.00995969	1.62103
ZNF649	0.511295	1.59397	4.26554	6.23048e-05	0.00995969	1.56048
AL445423.3	-1.16735	2.14965	-4.26456	6.25226e-05	0.00995969	1.62621
PINX1	0.411434	1.87206	4.26454	6.25263e-05	0.00995969	1.60106
MKNK1	-0.520184	5.97582	-4.26118	6.32743e-05	0.00995969	1.59131
UTP18	0.403176	4.03314	4.25953	6.36457e-05	0.00995969	1.60255
SLC9A8	-0.532272	5.5424	-4.25939	6.36759e-05	0.00995969	1.5825
AC015871.7	-0.913698	-0.451902	-4.25747	6.41112e-05	0.00995969	1.02557
NUP88	0.469868	4.05567	4.25746	6.41122e-05	0.00995969	1.59631
LRG1	-0.840426	6.3517	-4.25313	6.5101e-05	0.0100006	1.56949
HPCAL1	-0.399326	5.81287	-4.25223	6.53084e-05	0.0100006	1.56059
AC099560.2	1.5128	4.28523	4.24323	6.74179e-05	0.0101324	1.55433
PDLIM7	-0.746353	6.45056	-4.24191	6.77337e-05	0.0101324	1.53369
CD79B	0.798032	5.52938	4.24065	6.80356e-05	0.0101324	1.52461
UBAP1	-0.431569	5.94983	-4.24055	6.806e-05	0.0101324	1.5235
SBNO2	-0.57761	7.63716	-4.23022	7.05851e-05	0.0103215	1.50963
FCAR	-0.844858	4.82402	-4.22975	7.07006e-05	0.0103215	1.48751
SIGLEC9	-0.544562	5.33432	-4.22805	7.11252e-05	0.0103215	1.47975
IFNGR2	-0.562135	7.02652	-4.22753	7.12557e-05	0.0103215	1.4929
MARC1	-0.764176	4.63137	-4.22389	7.21773e-05	0.0103848	1.46947
TEX10	0.334156	3.3311	4.21901	7.34263e-05	0.0104668	1.48831
AL021707.6	-0.694555	1.75214	-4.21697	7.39577e-05	0.0104668	1.46427
ACSL1	-0.916289	8.88644	-4.21351	7.48635e-05	0.0104668	1.46834
EFL1	0.372946	3.15026	4.21303	7.49897e-05	0.0104668	1.4716
KIF3C	-0.607327	2.83918	-4.21228	7.51881e-05	0.0104668	1.46997
HSPA9	0.335608	5.90491	4.20904	7.60478e-05	0.0104696	1.42074
DHX34	-0.588321	6.17807	-4.20823	7.62665e-05	0.0104696	1.42086
WDTC1	-0.49482	6.77776	-4.20656	7.67153e-05	0.0104696	1.4224
APMAP	-0.664881	7.22723	-4.2049	7.7162e-05	0.0104696	1.42341
METAP2	0.520504	4.01714	4.19906	7.87621e-05	0.010542	1.40665
TMEM120A	-0.557391	4.81286	-4.19834	7.89617e-05	0.010542	1.38514
RIOK2	0.552272	2.65221	4.19759	7.9171e-05	0.010542	1.42459
HSPD1	0.365497	5.59545	4.19342	8.03387e-05	0.0106081	1.36906
RHOH	0.444084	4.94069	4.19229	8.06564e-05	0.0106081	1.3685
RAD50	0.527311	3.33956	4.19048	8.1171e-05	0.0106106	1.39812
MEAF6	0.270141	4.587	4.18006	8.41915e-05	0.0108761	1.33303
CD52	1.09358	6.00695	4.1779	8.48308e-05	0.0108761	1.32258
FCRLA	1.08139	3.5399	4.17558	8.5523e-05	0.0108761	1.35523
CCT4	0.343333	5.38054	4.17481	8.57525e-05	0.0108761	1.3087
EEF1A1	0.677957	12.0204	4.17423	8.59267e-05	0.0108761	1.34559
C3orf86	-0.951479	2.99882	-4.17318	8.62457e-05	0.0108761	1.34282
HNRNPR	0.322631	5.82993	4.16801	8.78181e-05	0.0110042	1.28761
SNHG6	0.539106	3.7294	4.16293	8.93922e-05	0.0110042	1.29875
MS4A1	1.08544	5.8118	4.15992	9.03377e-05	0.0110042	1.26478
JAK3	-0.398937	7.55707	-4.15992	9.03388e-05	0.0110042	1.28297
AQP9	-0.7876	8.79556	-4.15886	9.06738e-05	0.0110042	1.2933
ENOPH1	0.52128	2.90946	4.15707	9.12436e-05	0.0110042	1.29777
AGPAT1	-0.398949	5.20519	-4.15679	9.13329e-05	0.0110042	1.24907
CKAP4	-0.67716	5.60519	-4.15668	9.13678e-05	0.0110042	1.24965
ZNF467	-0.68239	6.14325	-4.1523	9.2775e-05	0.0111112	1.24112
APOBEC3A	-0.78362	6.97086	-4.14805	9.41613e-05	0.0112075	1.23716
SEMA4A	-0.689924	6.28194	-4.14665	9.46247e-05	0.0112075	1.22422
LARS	0.317505	5.26462	4.13924	9.71008e-05	0.0114376	1.19442
IMPDH1	-0.582187	7.4023	-4.13659	9.80032e-05	0.0114808	1.2064
SLC12A5-AS1	-1.71704	-2.14641	-4.13135	9.98098e-05	0.0115786	-0.321432
QPCT	-0.803645	6.10153	-4.13103	9.99181e-05	0.0115786	1.17148
GIMAP7	0.635289	5.67669	4.11456	0.000105811	0.0121421	1.11688
PANX2	-0.761951	4.52519	-4.11402	0.000106013	0.0121421	1.11738
C9orf139	-0.481304	4.23255	-4.11151	0.000106941	0.0121421	1.11557
PAICS	0.307789	3.71802	4.10987	0.00010755	0.0121421	1.12943
ZNF671	0.32283	3.65079	4.10959	0.000107656	0.0121421	1.13233
DBF4	0.455955	2.24066	4.10737	0.00010849	0.0121421	1.13578
EED	0.457679	3.17197	4.10669	0.000108745	0.0121421	1.13537
RPL6	0.710312	7.35918	4.09936	0.000111548	0.0123905	1.08682
RPP30	0.314817	2.82408	4.09748	0.000112279	0.0124074	1.11121
IL10RB	-0.445299	6.10409	-4.09304	0.000114019	0.0125268	1.04991
FURIN	-0.580434	7.14611	-4.09175	0.000114528	0.0125268	1.0598
PADI4	-0.839533	6.67939	-4.08879	0.000115713	0.0125921	1.04478
CSRNP1	-0.49564	4.68845	-4.08178	0.000118553	0.012836	1.01301
BEST1	-0.628659	5.32832	-4.0792	0.000119619	0.0128674	1.00059
OXER1	-0.762275	3.57474	-4.07817	0.000120043	0.0128674	1.02724
CTLA4	0.695108	1.55792	4.07584	0.000121016	0.0129046	0.991146
CTSA	-0.541409	6.51133	-4.0736	0.000121957	0.0129046	0.99421
DHRS13	-0.670041	4.31343	-4.07303	0.000122195	0.0129046	0.99149
C12orf57	0.634514	4.37842	4.07077	0.000123156	0.0129422	0.988916
ZNF438	-0.566146	3.59379	-4.06864	0.000124066	0.0129742	0.997082
PWP1	0.34182	3.77834	4.06391	0.00012611	0.0130529	0.983041
PPA2	0.478409	3.03047	4.06304	0.000126489	0.0130529	1.00174
UBALD2	-0.507383	7.02555	-4.06269	0.000126644	0.0130529	0.966454
RPL13A	0.576285	9.42895	4.05655	0.000129354	0.0130731	0.977254
NCL	0.358787	7.38324	4.05565	0.000129756	0.0130731	0.947588
LPCAT3	-0.418226	4.42039	-4.05558	0.000129789	0.0130731	0.934617
EPRS	0.327595	5.28225	4.05491	0.000130089	0.0130731	0.925219
HSPA8	0.35262	8.57071	4.05293	0.000130982	0.0130731	0.955664
ALOX5AP	-0.754977	7.27768	-4.05273	0.00013107	0.0130731	0.939666
TCIRG1	-0.415428	8.27999	-4.05264	0.000131109	0.0130731	0.952239
PCNA	0.355039	3.96739	4.04737	0.000133517	0.0132515	0.924509
FAM210A	0.442524	1.85661	4.04477	0.000134717	0.0133091	0.927574
MTO1	0.2763	4.1032	4.04329	0.000135406	0.0133157	0.907342
CYHR1	-0.262116	6.0095	-4.04052	0.000136702	0.0133818	0.881814
GMPS	0.308736	4.11154	4.03499	0.000139331	0.0135626	0.881728
TMEM19	0.372825	3.67722	4.03398	0.000139814	0.0135626	0.895263
CACNA1E	-0.884562	1.82207	-4.03026	0.000141615	0.0136065	0.900167
ZNF787	-0.424926	4.80382	-4.02935	0.000142059	0.0136065	0.844724
PLAUR	-0.677197	5.69426	-4.0282	0.000142622	0.0136065	0.840392
DEDD	-0.259882	4.75255	-4.02782	0.000142806	0.0136065	0.840935
IKBKG	-0.322357	5.40487	-4.02599	0.00014371	0.0136198	0.831803
SRSF3	0.338535	6.51765	4.0249	0.00014425	0.0136198	0.837876
RPS3	0.533247	8.92608	4.02369	0.000144851	0.0136198	0.869535
NGRN	0.309213	4.51029	4.02171	0.000145837	0.0136281	0.829378
HCK	-0.593097	8.4349	-4.02097	0.00014621	0.0136281	0.854894
WBP2	-0.596987	7.45497	-4.01894	0.00014723	0.0136594	0.835083
DKC1	0.277066	4.51887	4.01778	0.000147821	0.0136594	0.817435
FGD3	-0.434033	8.3273	-4.01536	0.000149053	0.0137135	0.836766
IL17RA	-0.554903	7.90099	-4.01308	0.000150222	0.0137135	0.822815
RPL4	0.592655	9.07672	4.01142	0.000151081	0.0137135	0.832687
HNRNPA1L2	0.466872	1.89664	4.01112	0.000151238	0.0137135	0.830822
DGAT2	-0.7465	6.70019	-4.01041	0.000151605	0.0137135	0.796636
ITGAX	-0.629028	8.7227	-4.00263	0.0001557	0.0138808	0.802671
TNFRSF1A	-0.571021	7.85229	-4.00109	0.000156528	0.0138808	0.784656
HILPDA	0.62117	0.251365	4.00026	0.000156969	0.0138808	0.535514
UTP15	0.511632	2.07951	4.00002	0.0001571	0.0138808	0.804498
NCBP2	0.39986	4.64531	3.99994	0.000157142	0.0138808	0.75966
MAPKAPK5-AS1	0.437526	3.23865	3.99773	0.000158336	0.0138808	0.792402
ILF2	0.328076	5.25316	3.99553	0.000159533	0.0138808	0.737475
AATK	-0.726401	6.39539	-3.99403	0.000160358	0.0138808	0.741917
RPSA	0.610365	8.4494	3.99401	0.000160366	0.0138808	0.770039
GRAMD1A	-0.447918	6.4926	-3.99368	0.000160546	0.0138808	0.740068
ZW10	0.351017	2.41776	3.99127	0.000161874	0.0138808	0.786144
NR6A1	-0.598641	2.58299	-3.99086	0.000162103	0.0138808	0.782569
NPM1	0.570733	6.63827	3.99062	0.000162237	0.0138808	0.733439
RPL35	0.89274	5.90176	3.99011	0.000162519	0.0138808	0.724159
EDEM2	-0.271305	4.89558	-3.98575	0.00016496	0.0140334	0.706662
MMP9	-1.2213	6.75689	-3.98393	0.000165994	0.0140655	0.717475
GNG5	-0.456287	5.34228	-3.98157	0.000167335	0.0140747	0.691867
NFIL3	-0.709821	5.236	-3.98018	0.000168134	0.0140747	0.687485
DGCR2	-0.408688	6.6779	-3.97978	0.000168359	0.0140747	0.699395
OXCT1	0.541858	3.25505	3.97914	0.000168729	0.0140747	0.738666
DNAJC9	0.460232	3.17424	3.97693	0.000170008	0.0141054	0.731044
TRIM8	-0.40278	6.59403	-3.97597	0.000170564	0.0141054	0.686147
RIPK3	-0.283924	4.41364	-3.97511	0.00017107	0.0141054	0.680207
SLC12A9	-0.467836	7.47776	-3.9726	0.000172542	0.0141723	0.689837
ARHGEF11	-0.512686	5.69348	-3.96897	0.00017469	0.0142904	0.653905
LILRB3	-0.659479	7.61738	-3.96661	0.000176104	0.0142904	0.673733
AC090559.1	-0.415173	5.76715	-3.96627	0.000176306	0.0142904	0.645806
BRI3	-0.535183	6.37671	-3.9657	0.000176646	0.0142904	0.651248
URI1	0.444418	4.26555	3.96372	0.000177844	0.0143332	0.656579
RCC1	0.367638	3.27631	3.96246	0.000178613	0.0143343	0.684259
NFAM1	-0.628435	8.71421	-3.9615	0.000179196	0.0143343	0.674556
DYSF	-0.869286	7.72039	-3.95954	0.000180398	0.0143364	0.65431
NT5C2	-0.444774	6.38728	-3.95905	0.000180697	0.0143364	0.630018
RRN3	0.438611	3.97848	3.95819	0.000181228	0.0143364	0.64899
AC084871.3	-0.91158	0.701134	-3.95381	0.000183954	0.0144732	0.570194
SLC9A1	-0.532844	4.54365	-3.95324	0.000184307	0.0144732	0.609595
ADH5	0.546198	4.39395	3.95108	0.000185669	0.0144836	0.613707
RPL15	0.495676	8.22493	3.94916	0.000186887	0.0144836	0.627385
DNM2	-0.311954	7.68192	-3.94508	0.000189497	0.0144836	0.60758
MRPL48	0.612313	2.08395	3.94481	0.000189668	0.0144836	0.642761
PHF14	0.427291	3.71191	3.94366	0.000190412	0.0144836	0.609201
APCDD1	-0.827701	-0.0265189	-3.94338	0.000190595	0.0144836	0.348664
DNAJA3	0.255776	4.24416	3.94298	0.000190855	0.0144836	0.59027
CYSTM1	-0.757797	3.98812	-3.94274	0.000191012	0.0144836	0.59072
PNPLA1	-0.83651	1.34792	-3.94272	0.000191024	0.0144836	0.613423
MRFAP1L1	0.46913	4.9093	3.94245	0.000191196	0.0144836	0.574707
SRPRB	0.342657	3.88435	3.93728	0.000194584	0.0145223	0.58365
FAM238A	-0.666817	-0.27754	-3.93623	0.00019528	0.0145223	0.321108
RSL1D1	0.369234	5.69164	3.93622	0.00019529	0.0145223	0.552422
HLA-DRA	0.571028	8.85539	3.93597	0.000195456	0.0145223	0.595479
NDC1	0.492792	2.5002	3.9353	0.000195896	0.0145223	0.617279
STRADA	-0.24455	5.14557	-3.93479	0.000196236	0.0145223	0.545833
EEF1G	0.488813	9.39111	3.93411	0.000196693	0.0145223	0.598107
AC215522.2	-0.93247	2.41145	-3.93346	0.000197126	0.0145223	0.611706
FCGR2A	-0.646454	8.88686	-3.93219	0.000197979	0.0145241	0.585978
CD3D	0.772136	4.42715	3.93042	0.000199168	0.0145241	0.547533
ALOX5	-0.591653	7.79531	-3.9304	0.000199183	0.0145241	0.56401
SLC36A1	-0.569023	4.43787	-3.92808	0.000200757	0.0145436	0.534308
AFG3L2	0.315709	4.07955	3.92801	0.000200808	0.0145436	0.549468
CCR6	0.67186	3.48413	3.92206	0.000204901	0.0146613	0.562331
MLLT1	-0.389604	5.65084	-3.92189	0.000205018	0.0146613	0.506348
CWF19L2	0.454607	4.12151	3.92155	0.000205249	0.0146613	0.525561
CUX1	-0.373445	5.55474	-3.92101	0.000205628	0.0146613	0.503086
EEF1A1P13	0.862465	0.925507	3.92069	0.000205852	0.0146613	0.458978
RPL11	0.857767	6.88226	3.91762	0.000208005	0.0147656	0.510225
KCND1	-0.646946	1.05969	-3.91383	0.000210691	0.0148122	0.497943
AC240565.2	-1.1538	4.28216	-3.91368	0.000210799	0.0148122	0.490897
CTSD	-0.621218	8.34451	-3.91083	0.000212841	0.0148122	0.513993
LRFN1	-0.617723	4.05849	-3.91065	0.000212971	0.0148122	0.488078
UTP23	0.368127	3.13218	3.9102	0.000213296	0.0148122	0.530503
DNAH17	-0.577303	3.35652	-3.9101	0.000213365	0.0148122	0.51205
SH3BP2	-0.305956	7.43128	-3.90992	0.000213498	0.0148122	0.494411
CDA	-0.831616	6.07241	-3.90685	0.000215729	0.0148892	0.465587
TOMM7	1.19596	3.45868	3.90567	0.000216588	0.0148892	0.507611
RPS18	0.81325	7.61962	3.90314	0.00021845	0.0148892	0.476269
NARS2	0.469466	2.08598	3.90027	0.000220579	0.0148892	0.508293
TGM3	-1.17804	2.35382	-3.89936	0.000221261	0.0148892	0.508527
CYP4F3	-0.697759	7.09023	-3.89849	0.000221907	0.0148892	0.454113
CANT1	-0.452403	6.29816	-3.89837	0.000221996	0.0148892	0.440562
KIAA0319L	-0.385627	6.26158	-3.89779	0.000222432	0.0148892	0.438395
TRIOBP	-0.415272	6.06164	-3.89725	0.000222839	0.0148892	0.434227
SPI1	-0.679434	8.68389	-3.89685	0.000223145	0.0148892	0.475589
MAP3K3	-0.431559	7.16979	-3.89527	0.000224333	0.0148892	0.44548
F5	-0.750443	4.41444	-3.89458	0.00022486	0.0148892	0.42799
SNHG29	0.648966	5.77023	3.8933	0.000225831	0.0148892	0.420504
PLEKHM1P1	-0.380096	5.69131	-3.89173	0.000227036	0.0148892	0.41311
ITGAM	-0.510761	7.23499	-3.89109	0.000227522	0.0148892	0.433046
RPL10A	0.484603	7.69751	3.89042	0.000228039	0.0148892	0.439079
CHST15	-0.608391	7.32383	-3.89031	0.000228126	0.0148892	0.432848
TMEM91	-0.595929	4.95275	-3.8894	0.000228825	0.0148892	0.405329
MRPL27	0.542921	2.20732	3.88783	0.000230038	0.0148892	0.474726
RPS17	1.16603	5.81894	3.88599	0.000231476	0.0148892	0.400691
PSMC2	0.508601	3.86359	3.88532	0.000231996	0.0148892	0.425028
S100A11	-0.729986	8.34107	-3.88507	0.000232192	0.0148892	0.434989
RPL30	0.76313	7.48564	3.8846	0.000232562	0.0148892	0.416546
NDUFS3	0.422277	3.61598	3.88442	0.000232699	0.0148892	0.429498
FAM160A2	-0.338335	5.08345	-3.88331	0.000233574	0.0148892	0.386251
PHF12	-0.395528	6.20719	-3.8826	0.000234137	0.0148892	0.390325
TTC19	0.313697	3.63523	3.88202	0.000234589	0.0148892	0.424232
ADM	-0.893111	4.65647	-3.87997	0.00023622	0.0148892	0.380687
LIMK2	-0.586466	7.27163	-3.87957	0.00023654	0.0148892	0.398578
PLXDC2	-0.51374	5.59818	-3.87672	0.000238818	0.0148892	0.365966
LRCH4	-0.325652	7.14938	-3.87531	0.000239955	0.0148892	0.383729
KCNJ15	-0.718639	7.00174	-3.87146	0.000243082	0.0148892	0.370119
DTD2	0.44167	1.89525	3.87144	0.000243106	0.0148892	0.419056
KIF1B	-0.458558	4.72151	-3.87121	0.000243293	0.0148892	0.352314
TIMM17A	0.47033	3.11871	3.86908	0.000245041	0.0148892	0.403883
DEDD2	-0.397355	6.23224	-3.86904	0.000245073	0.0148892	0.349235
GALNT14	-1.02822	1.06524	-3.86857	0.00024546	0.0148892	0.37221
NOP53	0.443255	8.29609	3.86823	0.00024574	0.0148892	0.38082
RPLP0	0.552721	8.61003	3.8681	0.000245846	0.0148892	0.385115
C19orf38	-0.503931	5.55293	-3.86797	0.000245957	0.0148892	0.339416
PPP1R12B	-0.572311	5.72939	-3.86775	0.000246143	0.0148892	0.339341
AL732372.2	-0.845766	5.45039	-3.86774	0.00024615	0.0148892	0.338228
RAP1GDS1	0.268942	4.04558	3.86717	0.000246617	0.0148892	0.36245
NCF4	-0.606774	7.70714	-3.86709	0.000246688	0.0148892	0.36915
RBM8A	0.207444	5.63958	3.86682	0.00024691	0.0148892	0.336564
FBRS	-0.384598	6.69208	-3.86629	0.000247354	0.0148892	0.34781
HIKESHI	0.450355	2.76457	3.86565	0.000247882	0.0148892	0.404436
PPP3CC	0.400681	3.8791	3.86558	0.000247945	0.0148892	0.367175
GNPNAT1	0.404258	2.38169	3.86243	0.000250586	0.0148995	0.399892
CZIB	0.249237	3.84021	3.8616	0.000251279	0.0148995	0.350257
GTF2IP12	-0.456187	4.47899	-3.86123	0.000251597	0.0148995	0.324665
TMEM14A	0.755075	0.71552	3.86085	0.00025192	0.0148995	0.238831
DNAJC19	0.621903	2.11661	3.86003	0.000252614	0.0148995	0.389496
GAS5	0.756427	3.94821	3.85914	0.000253371	0.0148995	0.343461
MXD3	-0.492118	4.37856	-3.85897	0.000253515	0.0148995	0.320625
RAB4A	0.340546	3.43414	3.85878	0.000253676	0.0148995	0.359566
CAMTA2	-0.327238	5.77849	-3.85757	0.000254706	0.0149191	0.308525
PEBP1	0.363243	5.12197	3.85667	0.000255476	0.0149234	0.306432
SNHG12	0.376374	3.2388	3.85541	0.000256559	0.014946	0.359314
PLIN3	-0.530971	5.85017	-3.85294	0.000258704	0.0150044	0.295274
SHISA5	-0.460275	7.72291	-3.85264	0.000258962	0.0150044	0.324997
GLRX3	0.400221	3.22882	3.84896	0.000262182	0.0151185	0.338879
ELL	-0.489414	5.90511	-3.84877	0.000262342	0.0151185	0.282364
FAM136A	0.436942	3.19052	3.84614	0.000264669	0.0152117	0.333408
CCDC153	-0.725995	1.36764	-3.84358	0.00026695	0.0152353	0.321449
GPR84	-1.09553	0.0339784	-3.84352	0.000267006	0.0152353	0.134356
VMA21	0.37316	3.65285	3.8424	0.000268011	0.0152353	0.304096
ANXA2R	0.511831	3.10243	3.84226	0.000268136	0.0152353	0.321493
SNHG32	0.550803	4.76426	3.84117	0.000269113	0.0152353	0.264078
HIST1H4I	-0.716474	1.83717	-3.84092	0.000269343	0.0152353	0.334406
MX2	-0.557219	7.47316	-3.83987	0.000270294	0.0152488	0.281096
ARHGAP9	-0.515741	8.3278	-3.83822	0.000271788	0.0152929	0.291747
POLR2D	0.221184	3.83409	3.83397	0.000275688	0.0154717	0.267679
CCDC25	0.490981	2.89984	3.83046	0.000278942	0.0156135	0.295115
NACC1	-0.300053	5.07246	-3.82898	0.000280329	0.0156503	0.219047
SLED1	-1.53058	-2.11029	-3.82668	0.000282495	0.0157302	-0.893806
RPL23	1.33608	5.08793	3.82474	0.000284331	0.0157914	0.217411
PRIM1	0.489566	1.78718	3.82326	0.000285743	0.0158026	0.275505
SLC25A32	0.697524	2.47801	3.82298	0.000286006	0.0158026	0.283436
PRAM1	-0.572024	6.36055	-3.82004	0.000288831	0.0158608	0.201644
B4GALT5	-0.6483	6.05585	-3.8194	0.000289453	0.0158608	0.194233
RPS27	1.26384	6.5246	3.81822	0.000290594	0.0158608	0.198839
CARD6	-0.458551	4.06163	-3.81812	0.000290694	0.0158608	0.205223
SREK1IP1	0.39369	3.58529	3.81718	0.000291607	0.0158608	0.230766
ARRB2	-0.468485	8.72924	-3.81693	0.000291854	0.0158608	0.233507
NAA15	0.383211	3.97886	3.81605	0.000292707	0.0158608	0.210696
DENND3	-0.561371	7.81692	-3.81577	0.000292978	0.0158608	0.213246
MAU2	-0.307908	6.19024	-3.81449	0.000294235	0.0158887	0.180929
MANSC1	-0.751325	4.8011	-3.81208	0.000296611	0.0159767	0.169672
DTYMK	0.310125	2.52849	3.8108	0.000297889	0.0159932	0.24484
UBE2N	0.404779	4.68428	3.80938	0.000299296	0.0159932	0.168741
PPIA	0.499306	7.42744	3.80779	0.000300886	0.0159932	0.182056
NOL7	0.243107	4.17739	3.8069	0.000301782	0.0159932	0.171689
EIF5B	0.366297	5.57695	3.80685	0.000301839	0.0159932	0.152862
EPB41L4A-AS1	0.436333	2.54318	3.80524	0.000303459	0.0159932	0.228545
SH2D3C	-0.420305	6.46174	-3.80435	0.000304367	0.0159932	0.154161
CDS2	-0.351288	6.16684	-3.80345	0.000305274	0.0159932	0.147248
TYK2	-0.336683	7.42773	-3.80322	0.000305508	0.0159932	0.16824
ZNF865	-0.335169	4.6745	-3.80237	0.000306372	0.0159932	0.142482
AC004917.1	-1.65022	-2.63011	-3.80208	0.000306678	0.0159932	-1.23587
DDX47	0.30456	4.0471	3.802	0.000306756	0.0159932	0.163204
ALOX12	-0.55638	2.87976	-3.80037	0.000308423	0.0159932	0.194278
LSM4	0.268801	4.42659	3.80026	0.00030854	0.0159932	0.144814
DPH5	0.694221	2.16243	3.80024	0.000308556	0.0159932	0.216287
ITGAE	0.423816	2.31296	3.79995	0.000308853	0.0159932	0.215848
HRH2	-0.646337	6.65217	-3.7985	0.000310349	0.016032	0.139531
GAB2	-0.621392	6.78408	-3.79607	0.000312871	0.0160444	0.135067
PTMA	0.351173	8.50204	3.79472	0.000314281	0.0160444	0.160569
AC011445.1	-0.685529	1.06376	-3.79443	0.00031459	0.0160444	0.161483
SLC16A3	-0.577633	7.65283	-3.79318	0.000315901	0.0160444	0.143076
TNFSF14	-0.495518	5.62281	-3.79271	0.000316396	0.0160444	0.108666
CICP27	-0.653418	4.30097	-3.79158	0.000317584	0.0160444	0.115737
TRPM6	-0.701823	3.53234	-3.79126	0.000317929	0.0160444	0.145392
HLA-DPA1	0.477864	7.81466	3.79119	0.000318001	0.0160444	0.13714
SNRPA1	0.306225	3.79617	3.791	0.000318196	0.0160444	0.14024
CHD1L	0.329842	4.02879	3.79092	0.000318283	0.0160444	0.132564
AC000093.1	-0.905379	4.42803	-3.79041	0.000318822	0.0160444	0.106291
FLCN	-0.256204	5.3785	-3.78943	0.000319862	0.0160578	0.0978026
HIST1H2BK	-0.750519	2.59855	-3.78875	0.000320587	0.0160578	0.172672
BLMH	0.334777	3.83305	3.788	0.000321391	0.0160605	0.128235
AC145098.2	-0.778189	1.56978	-3.78654	0.000322951	0.016101	0.170813
PURA	0.328085	4.02537	3.78557	0.000323998	0.0161157	0.116129
TOMM20	0.3997	4.965	3.78477	0.000324858	0.0161211	0.0889418
SNRPB2	0.437892	3.51417	3.78347	0.000326263	0.0161534	0.12786
MAPK13	-0.474148	5.9288	-3.78277	0.000327033	0.0161542	0.0811031
LINC00926	0.739646	4.95699	3.78185	0.000328032	0.0161663	0.0878464
DCAF13	0.607689	2.8146	3.77995	0.000330109	0.0162294	0.148046
RTN3	-0.580198	7.85512	-3.7793	0.000330825	0.0162294	0.103921
PGD	-0.588489	7.77369	-3.77752	0.000332785	0.0162882	0.0979171
NASP	0.27736	5.12888	3.7764	0.000334017	0.0163033	0.0608328
CWC27	0.504707	2.44717	3.77587	0.000334614	0.0163033	0.143385
ATG16L2	-0.489033	8.58785	-3.77431	0.000336344	0.0163184	0.102077
SMIM25	-0.558841	6.08454	-3.77375	0.000336973	0.0163184	0.0564573
MTDH	0.282839	5.82656	3.77354	0.000337206	0.0163184	0.0521806
GNL3	0.735813	3.46274	3.77102	0.000340038	0.0164183	0.100254
TLR1	-0.517814	6.01523	-3.7675	0.000344036	0.016574	0.0352269
ZPR1	0.230399	4.13839	3.76679	0.000344843	0.0165756	0.0520193
MAP3K11	-0.373093	7.10378	-3.76581	0.000345962	0.0165922	0.0496783
LILRB5	-0.647663	3.25847	-3.76367	0.000348429	0.0166531	0.0753632
FBXO21	0.350943	3.62317	3.76002	0.000352674	0.0166531	0.0563237
SIRPA	-0.590464	7.43418	-3.75988	0.000352833	0.0166531	0.0362869
PXN	-0.47112	8.4806	-3.75962	0.000353134	0.0166531	0.0569053
LILRA2	-0.639541	7.10819	-3.7595	0.000353274	0.0166531	0.0303759
B3GNT8	-0.731022	4.5926	-3.75743	0.000355701	0.0166531	0.00606312
SDAD1	0.333483	4.22349	3.75713	0.00035606	0.0166531	0.0218789
ARID3A	-0.500356	5.83238	-3.757	0.000356211	0.0166531	0.00194795
TRIM59	0.450704	2.42421	3.7569	0.000356336	0.0166531	0.0896926
EEF1B2	0.933804	5.01358	3.75652	0.000356784	0.0166531	0.00578025
GPR183	0.659742	4.49397	3.7562	0.000357159	0.0166531	0.0163392
SH3RF3	-0.631619	2.39179	-3.75447	0.000359211	0.0166531	0.0773611
ATG9A	-0.351677	5.19936	-3.75352	0.000360335	0.0166531	-0.0112705
CALD1	-0.611573	4.07827	-3.75236	0.000361727	0.0166531	0.00261392
KTN1	0.582576	5.14729	3.75184	0.000362346	0.0166531	-0.0112696
STAMBPL1	0.529619	2.36121	3.75175	0.000362455	0.0166531	0.075331
NQO2	-0.546425	5.65741	-3.74862	0.00036623	0.0166531	-0.0251627
MTMR3	-0.461008	6.86739	-3.74807	0.000366898	0.0166531	-0.00890564
TMEM184B	-0.435957	5.50572	-3.74787	0.000367132	0.0166531	-0.0277579
AC025682.1	-0.711634	-0.609577	-3.74721	0.000367942	0.0166531	-0.273718
ZNF213	-0.380806	3.82433	-3.74709	0.000368083	0.0166531	0.00110394
ABHD12B	-0.803598	0.981708	-3.74692	0.000368289	0.0166531	0.00991592
PLEK	-0.359632	7.82445	-3.7467	0.000368556	0.0166531	0.00441956
GTPBP2	-0.243528	5.32935	-3.74616	0.000369224	0.0166531	-0.0335041
CASP6	0.332018	2.39957	3.74592	0.00036951	0.0166531	0.0566651
P2RX1	-0.600818	5.1824	-3.74419	0.000371631	0.0166531	-0.0395789
ANPEP	-0.791844	7.59391	-3.74213	0.000374173	0.0166531	-0.0115636
LUCAT1	-0.614305	6.16635	-3.74155	0.00037489	0.0166531	-0.0399322
DBN1	-0.456126	3.78646	-3.74075	0.000375872	0.0166531	-0.0193093
DNAJC8	0.361043	4.9277	3.74067	0.000375976	0.0166531	-0.0455079
HK3	-0.502314	7.19535	-3.74059	0.000376077	0.0166531	-0.0247803
SOD1	0.45287	4.56388	3.74028	0.000376461	0.0166531	-0.0398194
PHB	0.35086	4.70256	3.73921	0.000377789	0.0166531	-0.0462145
CCT2	0.600223	4.28357	3.73881	0.000378298	0.0166531	-0.0319671
FUT8	0.490444	2.74474	3.73868	0.000378454	0.0166531	0.0302922
AC015802.6	-0.74593	2.91884	-3.73793	0.000379393	0.0166531	0.0113824
AC008753.2	-1.11507	-1.96557	-3.73754	0.000379883	0.0166531	-0.983947
HIST1H4D	-1.3818	-2.45862	-3.73685	0.000380748	0.0166531	-1.29349
HIBADH	0.391982	2.33984	3.73665	0.000381002	0.0166531	0.0307598
FKBP3	0.547556	3.19787	3.73609	0.000381711	0.0166531	0.00297451
DDX1	0.386047	4.23163	3.73528	0.000382733	0.0166531	-0.0430724
RPL36A	1.23317	3.51187	3.73483	0.000383301	0.0166531	-0.0118399
PFKFB3	-0.618537	5.54085	-3.73426	0.000384012	0.0166531	-0.0688575
MAPK14	-0.535111	6.92303	-3.73325	0.000385294	0.0166531	-0.0526979
AC020658.5	-0.974777	-1.27415	-3.7325	0.000386253	0.0166531	-0.58661
EIF3E	0.705623	5.87196	3.73246	0.000386299	0.0166531	-0.069671
LRRK1	-0.352059	5.09896	-3.73245	0.000386317	0.0166531	-0.074259
GBA	-0.442633	5.11977	-3.7323	0.000386515	0.0166531	-0.0752993
GTF2IP20	-0.351574	3.33034	-3.73219	0.000386647	0.0166531	-0.0233752
HIP1R	0.456761	4.705	3.7316	0.000387397	0.0166531	-0.0642144
AC124319.1	-1.4262	-2.1991	-3.7313	0.000387782	0.0166531	-1.19807
BFAR	0.240853	4.14018	3.73105	0.000388106	0.0166531	-0.0552995
MNT	-0.331049	5.07506	-3.72945	0.000390165	0.0166531	-0.0834081
DPRXP2	-1.44274	-2.41718	-3.72943	0.000390183	0.0166531	-1.18709
MAP3K4	0.31899	4.09489	3.72858	0.000391278	0.0166531	-0.0581875
SSB	0.531446	4.12483	3.72804	0.000391975	0.0166531	-0.0608773
ZDHHC18	-0.613651	8.20576	-3.72698	0.000393346	0.0166531	-0.0460298
NR1D2	0.568944	3.85278	3.72678	0.000393612	0.0166531	-0.0464598
WDR89	0.741549	2.20553	3.72661	0.000393823	0.0166531	0.00314932
TOM1	-0.4758	5.82857	-3.7263	0.000394237	0.0166531	-0.0905124
RPS24	0.861402	5.33322	3.726	0.000394615	0.0166531	-0.088888
ZNF830	0.303297	3.64061	3.72478	0.000396218	0.0166878	-0.0521055
AC026333.3	-1.43262	0.25135	-3.72298	0.000398573	0.0167237	-0.180904
TREML2	-0.581762	5.91732	-3.72293	0.000398628	0.0167237	-0.100032
LDHB	0.602168	6.71364	3.7214	0.00040065	0.0167634	-0.0898255
KIF20B	0.737936	2.09204	3.72103	0.000401138	0.0167634	-0.0142626
LINC00514	-0.677904	0.655695	-3.71988	0.000402651	0.0167813	-0.0788443
CYCS	0.370862	4.30109	3.71916	0.000403607	0.0167813	-0.094763
CARD19	-0.329303	4.84255	-3.71805	0.000405088	0.0167813	-0.116024
SNHG15	0.336927	2.94937	3.71801	0.000405145	0.0167813	-0.0424717
PAK1IP1	0.482631	1.7143	3.71776	0.000405482	0.0167813	-0.0294565
DIS3L	0.307917	3.82186	3.71653	0.000407117	0.0168165	-0.0835859
XPO6	-0.590193	8.84458	-3.71502	0.000409147	0.0168679	-0.069627
NCLN	-0.282821	5.51176	-3.70996	0.000416022	0.0170865	-0.141968
GRINA	-0.70876	6.81853	-3.70955	0.000416582	0.0170865	-0.124432
SELP	-0.768584	2.12572	-3.70904	0.000417281	0.0170865	-0.0521267
UBN1	-0.559696	7.02475	-3.70836	0.000418206	0.0170865	-0.124637
GNL2	0.386665	3.66993	3.70817	0.000418478	0.0170865	-0.102785
ITPRIP	-0.556877	6.21066	-3.70762	0.000419231	0.0170865	-0.141374
PLBD1	-0.582761	7.19092	-3.70655	0.000420709	0.0171142	-0.126307
AC114744.1	-0.882425	0.0555017	-3.70459	0.000423427	0.017161	-0.271777
AC063949.2	1.98146	-0.252964	3.70432	0.000423804	0.017161	-0.756565
VRK1	0.534103	1.84246	3.70351	0.000424933	0.017161	-0.0655738
C5AR2	-0.592575	6.58453	-3.70341	0.000425062	0.017161	-0.14748
CLN3	-0.264079	5.31005	-3.70244	0.000426421	0.0171835	-0.165106
BUB3	0.338853	5.19436	3.70025	0.000429503	0.0172331	-0.168699
FAM157C	-0.776157	5.63512	-3.70008	0.000429745	0.0172331	-0.17036
THOC5	-0.336671	5.14275	-3.69932	0.000430809	0.0172331	-0.174258
SEL1L3	0.467705	5.08177	3.69928	0.000430868	0.0172331	-0.167519
TARS	0.302575	4.23055	3.69852	0.000431944	0.017244	-0.154124
RPL17	1.28758	5.41548	3.69746	0.000433458	0.0172517	-0.170884
RALGAPA2	-0.468133	5.24094	-3.69725	0.000433746	0.0172517	-0.18066
ARL8A	-0.343136	5.28685	-3.69436	0.000437884	0.0173183	-0.189426
MCUB	0.407121	4.58707	3.69431	0.000437957	0.0173183	-0.176063
TSR2	0.232575	4.47739	3.6933	0.000439414	0.0173183	-0.179151
CLDND1	0.534628	4.43075	3.69316	0.000439609	0.0173183	-0.172884
TOR4A	-0.366938	5.0316	-3.6928	0.000440124	0.0173183	-0.193067
LILRB2	-0.473429	7.09604	-3.6927	0.000440268	0.0173183	-0.170231
RPS21	0.890655	4.73497	3.69128	0.000442326	0.0173674	-0.185189
NEPRO	0.352434	4.30246	3.69044	0.000443551	0.0173836	-0.179687
JUNB	-0.447571	7.38686	-3.68905	0.00044558	0.0174001	-0.175824
KCTD21	-0.385927	3.46774	-3.6889	0.000445788	0.0174001	-0.158086
RPL41	1.17846	7.08887	3.68793	0.000447209	0.0174001	-0.184855
TMEM92-AS1	-1.58481	-2.12209	-3.68779	0.000447418	0.0174001	-1.31933
NR1H2	-0.313084	5.9935	-3.68687	0.000448765	0.0174001	-0.206627
LINC00173	-0.655021	3.27357	-3.68672	0.000448994	0.0174001	-0.156681
KDSR	0.324921	3.53358	3.68627	0.000449653	0.0174001	-0.161356
MRPL39	0.744539	1.19157	3.68555	0.00045071	0.0174021	-0.154682
MAP11	-0.376163	5.95347	-3.68513	0.000451327	0.0174021	-0.212194
FOSL2	-0.529693	6.86362	-3.68398	0.000453032	0.0174365	-0.201436
ULK1	-0.498567	6.32207	-3.68272	0.000454909	0.017459	-0.214289
GART	0.256129	4.38304	3.68205	0.00045591	0.017459	-0.209026
HSPH1	0.459766	4.44612	3.68151	0.000456708	0.017459	-0.207782
PYGL	-0.721842	7.63101	-3.6814	0.000456876	0.017459	-0.192681
AL162377.1	-0.54071	0.99173	-3.68031	0.000458504	0.0174865	-0.162515
BMS1	0.320379	4.30876	3.67983	0.000459226	0.0174865	-0.211984
RIN3	-0.443927	7.19978	-3.67788	0.000462167	0.0175673	-0.211479
IMP4	0.281155	4.30929	3.67723	0.000463152	0.0175733	-0.221811
TBKBP1	-0.582953	4.71539	-3.6767	0.000463966	0.0175733	-0.238943
PSD4	-0.311704	7.77224	-3.67513	0.00046635	0.0176325	-0.208213
AL022098.1	-0.607983	2.32299	-3.67449	0.000467318	0.017638	-0.15316
NAE1	0.466846	2.99403	3.67278	0.000469945	0.0176797	-0.173613
GPATCH4	0.396272	3.39998	3.67251	0.000470359	0.0176797	-0.199299
RBM34	0.455277	3.64343	3.67216	0.000470898	0.0176797	-0.21024
F13A1	-0.779752	6.08108	-3.66972	0.00047467	0.017733	-0.253872
PLPPR2	-0.649226	6.14002	-3.66967	0.000474749	0.017733	-0.255285
RGS14	-0.364455	7.00765	-3.66964	0.000474798	0.017733	-0.2409
SAMM50	0.298221	4.05358	3.66856	0.000476471	0.0177645	-0.239059
RPL39	1.38421	4.98348	3.66792	0.000477475	0.017771	-0.252928
RPL5	0.630343	7.60039	3.66651	0.000479676	0.017822	-0.238359
PROK2	-0.943029	6.36225	-3.66516	0.000481792	0.0178697	-0.266743
RPL22P1	0.667896	5.27536	3.66236	0.000486215	0.0180026	-0.281083
METTL6	0.370891	2.07167	3.66176	0.000487175	0.018007	-0.182048
PTK2B	-0.312337	7.67122	-3.66063	0.000488976	0.0180227	-0.254359
RGS19	-0.388722	6.69571	-3.66043	0.000489281	0.0180227	-0.273707
PILRA	-0.607755	6.86703	-3.65927	0.000491139	0.0180601	-0.273504
AC012645.3	-0.374173	2.44069	-3.65843	0.000492485	0.0180786	-0.200821
BIRC3	0.601709	5.73418	3.65718	0.00049451	0.0181219	-0.296905
USP36	0.305103	4.89841	3.65563	0.000497007	0.0181823	-0.299286
BCL6	-0.741674	8.10706	-3.65466	0.000498587	0.018209	-0.263199
DNAJC2	0.371293	3.3119	3.65269	0.000501787	0.0182651	-0.24976
TNIP1	-0.474723	7.81537	-3.65235	0.000502356	0.0182651	-0.274847
NIFK	0.627403	2.71747	3.65215	0.000502677	0.0182651	-0.22242
HSP90AA1	0.643321	7.0664	3.64958	0.000506899	0.0183454	-0.299244
ZCCHC7	0.464602	3.41145	3.64944	0.00050713	0.0183454	-0.256607
GABARAP	-0.585025	7.53227	-3.64894	0.000507967	0.0183454	-0.290211
CLK3	-0.218802	6.24535	-3.64873	0.000508312	0.0183454	-0.316993
RPS3A	1.48044	6.47737	3.64781	0.000509845	0.0183603	-0.313215
DCTD	0.261326	4.31513	3.64719	0.00051087	0.0183603	-0.311656
GPSM3	-0.476215	8.33308	-3.64693	0.000511293	0.0183603	-0.279452
ECI2	0.281916	3.57376	3.64463	0.000515149	0.0184329	-0.286118
BEX2	0.866992	0.59884	3.6431	0.000517707	0.0184329	-0.331718
IL7	1.33927	-1.07064	3.64278	0.000518261	0.0184329	-1.01767
ZFP36	-0.425986	7.18834	-3.64227	0.000519106	0.0184329	-0.318883
ATP6V0A1	-0.393582	5.25632	-3.64037	0.000522341	0.0184329	-0.350312
FANCF	0.368552	3.13439	3.63994	0.000523063	0.0184329	-0.272941
RHOG	-0.55878	7.38299	-3.63989	0.000523143	0.0184329	-0.319704
SEM1	0.626054	1.65974	3.6398	0.000523295	0.0184329	-0.245614
CFAP298	0.307883	3.68661	3.63915	0.000524413	0.0184329	-0.308739
EIF3J	0.334679	4.38552	3.63812	0.000526166	0.0184329	-0.338711
RPS8	0.534998	7.85702	3.63805	0.000526292	0.0184329	-0.316878
PIK3CD	-0.401975	8.35852	-3.63801	0.000526364	0.0184329	-0.306995
GRASP	0.434561	1.78743	3.63753	0.000527179	0.0184329	-0.251679
MGRN1	-0.483663	6.44895	-3.63703	0.000528045	0.0184329	-0.347497
RPS14	0.59872	8.35979	3.63692	0.000528234	0.0184329	-0.309701
AL137789.1	-1.17693	-1.05007	-3.63689	0.00052828	0.0184329	-0.730005
TXNDC15	0.241353	4.01273	3.63684	0.000528372	0.0184329	-0.329793
PFKFB4	-0.636878	5.83692	-3.63537	0.000530899	0.0184329	-0.361133
TOLLIP	-0.357177	5.63292	-3.63516	0.000531262	0.0184329	-0.364495
HAL	-0.626009	5.74127	-3.6351	0.000531353	0.0184329	-0.363328
NDEL1	-0.484754	6.38146	-3.63509	0.000531371	0.0184329	-0.355044
AC138150.2	-0.873439	0.0691342	-3.63303	0.000534953	0.0185023	-0.396535
SFXN5	-0.376658	4.36532	-3.63255	0.000535785	0.0185023	-0.361776
CLNS1A	0.446113	4.0883	3.63245	0.000535962	0.0185023	-0.344038
RPL7L1	0.232219	5.31322	3.6308	0.000538832	0.0185715	-0.376949
CDKN2D	-0.456047	5.98911	-3.63007	0.000540121	0.0185861	-0.375543
GAS2L1	-0.759647	3.16846	-3.62908	0.000541859	0.018594	-0.323968
RPS7	1.31268	4.98072	3.62895	0.000542087	0.018594	-0.36758
PEAK3	-0.733805	4.37166	-3.62819	0.000543427	0.0186102	-0.375894
LRRC25	-0.539895	7.18172	-3.6263	0.000546766	0.0186115	-0.36499
UBA2	0.362493	4.76168	3.62619	0.000546969	0.0186115	-0.38254
ALPL	-1.08356	7.30009	-3.62601	0.000547275	0.0186115	-0.361614
TANGO2	-0.398551	5.90454	-3.62587	0.000547529	0.0186115	-0.388761
ALPK1	-0.540316	5.85409	-3.62572	0.000547805	0.0186115	-0.390268
PLEKHM1	-0.393448	5.96412	-3.62494	0.000549194	0.0186292	-0.391348
PNPLA2	-0.525727	7.09267	-3.62391	0.000551015	0.0186296	-0.373479
GSEC	-0.610028	2.33216	-3.62378	0.00055126	0.0186296	-0.297532
TMEM8A	-0.360456	6.39775	-3.62296	0.000552718	0.0186296	-0.389541
UAP1	0.400709	2.67063	3.6225	0.000553543	0.0186296	-0.306082
KLHL21	-0.452908	6.50031	-3.6225	0.000553552	0.0186296	-0.389672
XPOT	0.312027	4.51092	3.62091	0.000556411	0.0186875	-0.391425
CNPY2	0.334848	3.79308	3.62058	0.000557015	0.0186875	-0.368703
MMP25-AS1	-0.661257	7.04441	-3.61966	0.00055867	0.0187077	-0.386376
CD22	0.75191	5.43021	3.61772	0.000562202	0.0187077	-0.410541
RBM23	-0.347107	6.60451	-3.6175	0.000562591	0.0187077	-0.40291
THG1L	0.350731	2.29982	3.61652	0.00056439	0.0187077	-0.314704
TGFB1I1	-0.737187	0.247906	-3.6165	0.00056442	0.0187077	-0.408822
LSM5	0.509968	1.98071	3.61612	0.000565113	0.0187077	-0.310938
AL138995.1	-0.971394	-1.18314	-3.61561	0.000566054	0.0187077	-0.84786
ERH	0.762062	3.57018	3.61548	0.000566299	0.0187077	-0.365554
HNRNPDL	0.329293	6.74224	3.61535	0.000566534	0.0187077	-0.408371
FAM53C	-0.561745	6.56169	-3.61517	0.000566863	0.0187077	-0.410478
TP53RK	0.369295	3.25812	3.61498	0.000567219	0.0187077	-0.353587
DHRS12	-0.571392	3.82523	-3.61435	0.000568375	0.0187083	-0.401216
CALCOCO1	-0.300903	6.56689	-3.61402	0.000568982	0.0187083	-0.414007
VPS9D1	-0.379234	4.64782	-3.61296	0.000570933	0.0187293	-0.426639
RPS20	0.623953	7.1927	3.61273	0.000571367	0.0187293	-0.40405
MINDY1	-0.554774	5.94775	-3.61137	0.000573884	0.0187649	-0.431793
HSPA6	-0.606677	7.09805	-3.6112	0.000574204	0.0187649	-0.40933
FPR1	-0.70982	9.2506	-3.61067	0.00057519	0.0187685	-0.36745
ZNF582	0.878482	0.086054	3.60896	0.00057838	0.0188439	-0.566296
SLC19A1	-0.617161	6.06565	-3.60781	0.000580525	0.0188851	-0.440101
IL1R1	-0.690821	3.44755	-3.60579	0.000584333	0.0189743	-0.400307
EXTL3	-0.508032	5.61819	-3.60542	0.000585035	0.0189743	-0.452388
MRPS21	0.490155	3.26069	3.60288	0.000589875	0.0191023	-0.393476
SSH3	-0.424059	4.2943	-3.60055	0.000594318	0.0191485	-0.453386
SLC44A2	-0.450409	8.22293	-3.6	0.00059538	0.0191485	-0.420613
LEO1	0.260269	3.31267	3.5993	0.000596738	0.0191485	-0.40396
EIF4A2	0.463333	6.87478	3.5987	0.000597898	0.0191485	-0.4551
ZNF551	0.42612	2.34872	3.59834	0.000598582	0.0191485	-0.363507
DNAJB12	-0.320802	5.30013	-3.59831	0.000598636	0.0191485	-0.474513
NADK	-0.525142	8.4758	-3.59792	0.000599392	0.0191485	-0.420921
R3HDM4	-0.678757	8.97715	-3.59758	0.000600053	0.0191485	-0.41153
JPT2	0.289177	3.84352	3.59752	0.000600171	0.0191485	-0.436623
KIF1BP	0.299597	2.59097	3.59708	0.000601029	0.0191485	-0.375985
MRPS35	0.356768	3.3497	3.59703	0.000601127	0.0191485	-0.412611
TOMM70	0.40346	4.09746	3.59514	0.000604816	0.0192135	-0.451816
STAT5B	-0.404895	7.91578	-3.59506	0.000604958	0.0192135	-0.441571
MTF1	-0.370169	4.74362	-3.59405	0.000606944	0.019248	-0.481575
AC010173.1	-1.21887	-1.77156	-3.59304	0.00060892	0.0192822	-1.15537
GDE1	-0.412398	5.61506	-3.59152	0.000611909	0.0193193	-0.493056
RPL31	1.48368	4.33089	3.59143	0.000612093	0.0193193	-0.457499
MIR3945HG	-0.874178	0.538027	-3.59108	0.000612797	0.0193193	-0.454084
NUP43	0.295767	4.31206	3.59051	0.00061391	0.0193193	-0.476828
PPP1R18	-0.435966	8.33645	-3.59014	0.000614646	0.0193193	-0.446595
TPD52L2	-0.393071	6.80421	-3.58954	0.000615851	0.0193193	-0.480381
NCF1	-0.623739	8.90906	-3.58926	0.0006164	0.0193193	-0.435912
ABHD16A	-0.28977	5.04559	-3.5885	0.000617904	0.0193381	-0.502371
CSNK1A1L	-1.25472	-2.0723	-3.58593	0.000623049	0.0194707	-1.43761
TMEM243	0.460156	3.3965	3.58482	0.000625294	0.0195124	-0.446821
SS18L2	0.671517	2.19651	3.58411	0.000626728	0.0195288	-0.402897
MAGOH	0.45977	2.74382	3.58292	0.000629122	0.0195422	-0.42469
CFAP97	0.56116	3.43693	3.58266	0.000629667	0.0195422	-0.45164
EEF1AKMT2	0.491771	1.86013	3.58255	0.000629892	0.0195422	-0.40512
CCT3	0.284786	5.85248	3.58072	0.000633605	0.0196096	-0.522194
NGDN	0.510026	2.72997	3.58058	0.000633897	0.0196096	-0.430385
RAD1	0.37707	2.94192	3.57939	0.000636337	0.0196363	-0.441745
ZNF772	0.626403	1.17523	3.57926	0.000636589	0.0196363	-0.455545
MAP4K4	-0.389797	7.21026	-3.57765	0.000639908	0.0197103	-0.508249
HCAR2	-0.674214	5.67094	-3.57706	0.000641132	0.0197197	-0.535936
DBNL	-0.27259	7.8281	-3.57646	0.000642358	0.019729	-0.497025
NKRF	0.41982	2.64303	3.5759	0.000643513	0.019732	-0.43564
B9D2	-0.515741	3.07771	-3.57468	0.000646053	0.019732	-0.471918
PSMD14	0.479557	2.70848	3.57449	0.000646455	0.019732	-0.446293
NDST1	-0.640489	5.69193	-3.57426	0.000646929	0.019732	-0.542658
GNB2	-0.493407	8.061	-3.5742	0.000647058	0.019732	-0.498375
DDX10	0.323516	2.66225	3.57258	0.000650429	0.0197717	-0.449667
SEPTIN5	-0.901808	2.3096	-3.57244	0.000650735	0.0197717	-0.447954
CENPC	0.335384	3.5927	3.57152	0.000652651	0.0197717	-0.497014
ST6GALNAC2	-0.650539	4.48492	-3.57137	0.000652981	0.0197717	-0.543819
ARAP3	-0.529933	6.06555	-3.57103	0.000653682	0.0197717	-0.54863
PCGF6	0.578282	1.05967	3.57058	0.000654633	0.0197717	-0.47465
CSPP1	0.31727	2.9834	3.5705	0.000654815	0.0197717	-0.470993
FAM98B	0.404756	3.34714	3.56802	0.00066004	0.0198645	-0.49255
KDM6B	-0.608288	7.50972	-3.56799	0.000660114	0.0198645	-0.529053
ITGA5	-0.450643	6.96536	-3.56773	0.000660669	0.0198645	-0.541584
HDHD2	0.394889	3.40092	3.56603	0.00066429	0.0199251	-0.503445
GLMN	0.499702	1.22385	3.56591	0.000664543	0.0199251	-0.470312
TUBA1A	-0.553299	7.57746	-3.56521	0.000666044	0.0199295	-0.537201
SYNPO	0.851313	1.54799	3.56436	0.000667872	0.0199295	-0.472477
GLT1D1	-0.643099	6.6675	-3.56432	0.000667953	0.0199295	-0.556377
PRR14	-0.322834	5.19375	-3.56389	0.000668878	0.0199295	-0.575416
RAF1	-0.411937	7.60074	-3.56346	0.000669795	0.0199295	-0.53984
ACAT2	0.428095	2.56877	3.563	0.000670786	0.0199295	-0.472746
DDX21	0.315999	5.39811	3.56281	0.000671196	0.0199295	-0.576493
LUC7L	0.304893	4.86225	3.56084	0.000675454	0.0200282	-0.577158
TRAF5	0.468616	4.79433	3.55973	0.000677867	0.0200533	-0.575662
NHSL2	-0.461414	6.47045	-3.55912	0.000679206	0.0200533	-0.57745
LILRB4	-0.448764	3.9565	-3.55887	0.00067975	0.0200533	-0.5629
DNAJC10	0.350271	4.93352	3.55873	0.000680042	0.0200533	-0.582925
DAPK2	-0.60651	5.36106	-3.5579	0.00068187	0.0200796	-0.592812
PRXL2C	0.353125	2.39685	3.55654	0.000684839	0.0201059	-0.485772
MOCS2	0.511264	2.18078	3.55647	0.000684997	0.0201059	-0.480668
AC003681.1	-0.371371	4.43608	-3.55536	0.000687442	0.0201059	-0.58875
NUAK2	-0.462992	6.17491	-3.55534	0.000687503	0.0201059	-0.592922
PDIA6	0.269031	5.72902	3.55509	0.000688044	0.0201059	-0.598166
RPS10	0.766621	6.66691	3.55493	0.000688392	0.0201059	-0.584464
ZNF329	0.324017	2.58577	3.55334	0.000691921	0.0201721	-0.501129
CEBPA	-0.439646	5.14652	-3.55306	0.000692539	0.0201721	-0.606617
RNPEPL1	-0.314	7.35249	-3.55172	0.000695533	0.0202175	-0.579065
AC009948.2	-0.722741	0.552637	-3.55123	0.000696622	0.0202175	-0.569715
BST1	-0.483852	5.72532	-3.55109	0.000696929	0.0202175	-0.61072
RSAD1	0.297416	4.13443	3.54726	0.00070555	0.02044	-0.595049
SLC16A5	-0.402621	4.20403	-3.54581	0.000708833	0.0204405	-0.609666
EID1	0.514966	4.91674	3.54484	0.000711041	0.0204405	-0.623441
SLC37A3	-0.585875	3.92187	-3.54475	0.000711241	0.0204405	-0.600824
DDX50	0.486974	3.69734	3.54473	0.000711279	0.0204405	-0.579137
RANGRF	0.339028	3.10355	3.54456	0.000711667	0.0204405	-0.551418
TM6SF1	-0.518753	3.99379	-3.5445	0.000711799	0.0204405	-0.605493
ZNF22	0.740901	2.97878	3.54431	0.000712241	0.0204405	-0.533728
UTP14A	0.306884	3.46259	3.54354	0.000713992	0.0204551	-0.575691
MPC1	0.31769	3.19118	3.54325	0.000714661	0.0204551	-0.558022
CEBPG	0.384302	3.69754	3.54166	0.00071832	0.0205325	-0.586986
AJ003147.3	-0.41016	1.51107	-3.54067	0.000720602	0.0205623	-0.522775
MYL9	-1.45301	3.42239	-3.54037	0.000721282	0.0205623	-0.607061
PIK3R5	-0.314213	7.39787	-3.53996	0.000722242	0.0205623	-0.612599
RPL27	0.934438	6.16643	3.53854	0.000725531	0.0205742	-0.639406
NSUN7	-0.704731	1.97234	-3.53827	0.000726145	0.0205742	-0.527817
TIMP2	-0.555833	6.91882	-3.53819	0.000726332	0.0205742	-0.628426
ANKRD13D	-0.298595	7.01237	-3.53808	0.000726593	0.0205742	-0.626208
HLA-DOB	0.786907	3.15887	3.53771	0.000727457	0.0205742	-0.555453
NOM1	0.328454	3.4421	3.53649	0.0007303	0.0206192	-0.589443
RARA	-0.558275	6.83594	-3.5362	0.000730973	0.0206192	-0.634992
STRBP	0.591203	3.1104	3.53496	0.00073389	0.0206552	-0.567039
AC116353.6	-0.604555	0.741715	-3.53464	0.000734632	0.0206552	-0.566839
AL031777.3	-0.828957	1.2387	-3.53442	0.00073514	0.0206552	-0.543608
AL596244.1	0.894654	-0.389206	3.5334	0.000737541	0.0206956	-0.871579
MKNK2	-0.375891	8.0143	-3.53166	0.000741675	0.0207844	-0.623404
LRRC4	-0.693868	4.86913	-3.53048	0.000744481	0.0208069	-0.670315
HGS	-0.261599	5.84044	-3.5304	0.000744654	0.0208069	-0.669765
YIPF3	-0.420163	6.23771	-3.53009	0.00074539	0.0208069	-0.664643
RBCK1	-0.323867	6.46546	-3.52831	0.000749647	0.0208612	-0.665534
AL136295.5	-0.52058	3.31717	-3.52816	0.000750018	0.0208612	-0.619669
SIRPB2	-0.48946	6.23849	-3.52799	0.000750426	0.0208612	-0.671932
TOMM22	0.29186	4.34999	3.52745	0.000751715	0.0208612	-0.663651
UTP4	0.30575	3.23317	3.52698	0.000752853	0.0208612	-0.611586
NCKAP5L	-0.349508	4.01792	-3.52684	0.000753177	0.0208612	-0.656842
RAB1B	-0.374496	7.23195	-3.52627	0.000754557	0.0208725	-0.654707
EVI2B	-0.415995	8.68794	-3.52495	0.00075774	0.0209336	-0.627644
NPEPL1	-0.27761	5.75944	-3.52382	0.000760483	0.0209823	-0.689205
RBBP9	0.374799	2.20007	3.5222	0.000764433	0.0210642	-0.575491
RPS6	0.627878	8.02043	3.51992	0.00077001	0.0211421	-0.656172
ATP6V0B	-0.467745	7.07706	-3.51954	0.000770941	0.0211421	-0.67793
RAB43	-0.461466	6.11637	-3.5188	0.00077277	0.0211421	-0.699006
FTH1	-0.535715	10.587	-3.51868	0.000773059	0.0211421	-0.607516
RIOK1	0.307758	3.18365	3.5183	0.000774001	0.0211421	-0.628657
ATP6V1G1	0.629624	4.74099	3.51824	0.000774138	0.0211421	-0.6957
CD55	-0.509477	6.86889	-3.51823	0.000774165	0.0211421	-0.686983
NOP58	0.549708	3.7698	3.51712	0.000776902	0.0211899	-0.664441
FERMT3	-0.374984	7.30199	-3.51471	0.000782912	0.0213011	-0.68694
RIOX1	0.293314	3.03699	3.51379	0.00078521	0.0213011	-0.637691
TECPR2	-0.64205	6.01737	-3.5131	0.000786923	0.0213011	-0.717436
GK-AS1	-0.892757	-0.0690863	-3.51298	0.000787241	0.0213011	-0.771564
RBIS	0.833455	1.59285	3.51262	0.000788148	0.0213011	-0.60292
WNT16	1.10752	-1.05155	3.51178	0.00079026	0.0213011	-1.26907
MIR646HG	-0.473439	2.83609	-3.51169	0.000790482	0.0213011	-0.641288
ADGRE3	-0.648127	6.5093	-3.51168	0.000790497	0.0213011	-0.714057
ATP6V0D1	-0.475989	7.05493	-3.51152	0.000790912	0.0213011	-0.701632
SLC38A1	0.491933	6.33709	3.51152	0.000790915	0.0213011	-0.718908
AP4B1	0.234873	4.2398	3.51031	0.000793964	0.0213563	-0.707205
LILRA5	-0.653764	6.33769	-3.50888	0.000797585	0.0214026	-0.72107
MIOS	0.381236	3.17019	3.50884	0.000797681	0.0214026	-0.653138
SLC44A3-AS1	-1.01171	-0.491017	-3.50807	0.00079965	0.0214166	-0.835712
P2RY10	0.493055	4.62953	3.50785	0.000800199	0.0214166	-0.718884
GGA2	0.36276	5.90416	3.50673	0.000803068	0.0214666	-0.738113
CCSER2	0.341815	4.19302	3.5039	0.000810335	0.0216338	-0.719638
IMP3	0.25468	4.42035	3.50327	0.000811947	0.0216499	-0.734893
STRN4	-0.326174	6.12024	-3.50237	0.000814296	0.0216827	-0.747139
AL513327.1	-0.668436	3.168	-3.50163	0.000816205	0.0216827	-0.694146
ADAR	-0.419077	8.65085	-3.5011	0.000817584	0.0216827	-0.696511
NUP37	0.478981	1.93959	3.50098	0.000817893	0.0216827	-0.63008
LTB4R	-0.433777	5.91986	-3.50071	0.000818591	0.0216827	-0.753877
PRR13	-0.380874	7.39755	-3.50046	0.000819244	0.0216827	-0.725671
MYO1F	-0.50901	9.8517	-3.49915	0.00082268	0.0217228	-0.676538
CTDSP1	-0.300869	7.3123	-3.49911	0.000822786	0.0217228	-0.731822
NKIRAS2	-0.260527	4.51213	-3.49662	0.000829306	0.021868	-0.761042
GIMAP2	0.636807	5.11628	3.49241	0.000840496	0.0221132	-0.776849
LINC00937	-0.745659	3.52041	-3.49234	0.000840668	0.0221132	-0.729547
CCDC50	0.657556	3.93587	3.49168	0.000842444	0.0221219	-0.731946
MRPS27	0.251447	4.32948	3.49144	0.000843065	0.0221219	-0.765025
RALA	0.344737	3.77045	3.49039	0.000845899	0.0221491	-0.74066
MED10	0.3416	3.32705	3.49024	0.000846299	0.0221491	-0.718076
ZNF75A	0.343606	3.54734	3.4899	0.000847201	0.0221491	-0.73175
RNASEK	-0.423786	6.69818	-3.48902	0.000849567	0.0221839	-0.77386
SLC25A42	0.322839	3.64457	3.48811	0.000852029	0.0222212	-0.740548
OSM	-0.619503	1.72775	-3.48646	0.000856501	0.0223107	-0.670058
ADAM19	-0.438146	6.57306	-3.48491	0.00086072	0.0223718	-0.789801
NSMCE3	0.311516	3.64805	3.48453	0.000861771	0.0223718	-0.751986
C5AR1	-0.656844	8.17569	-3.48443	0.000862039	0.0223718	-0.754533
VPS37B	-0.381682	5.8315	-3.48407	0.000863021	0.0223718	-0.804112
BBC3	-0.473582	4.27576	-3.48344	0.000864748	0.0223895	-0.792086
HDAC5	-0.36635	6.26416	-3.48192	0.00086893	0.0224381	-0.803447
ARMC3	-1.22934	-2.1671	-3.48147	0.00087018	0.0224381	-1.62174
RGS3	-0.318601	5.30753	-3.48147	0.000870188	0.0224381	-0.814538
C16orf87	0.39941	1.72281	3.48124	0.000870813	0.0224381	-0.683804
SH2D1A	0.793325	3.30608	3.48008	0.000874007	0.0224875	-0.735068
TOP2B	0.29531	6.08273	3.47951	0.00087559	0.0224875	-0.814235
H2AFY	-0.281146	7.25213	-3.47921	0.000876429	0.0224875	-0.790364
CCDC97	-0.234895	5.30382	-3.47856	0.00087824	0.0224875	-0.822785
BLNK	0.732014	2.80716	3.47835	0.000878836	0.0224875	-0.706978
RNF135	-0.30065	4.25522	-3.47801	0.000879776	0.0224875	-0.80646
NVL	0.303035	3.23175	3.4779	0.000880072	0.0224875	-0.746231
SAMD4B	-0.285549	5.09453	-3.47527	0.000887438	0.0226487	-0.831454
GADD45GIP1	0.464429	3.45846	3.47457	0.000889397	0.0226717	-0.76977
TNFRSF8	-0.469071	3.34333	-3.47414	0.000890621	0.0226759	-0.773417
SNRPD2	0.784578	3.83168	3.47085	0.000899937	0.0228859	-0.800922
NUP155	0.260627	3.38759	3.46962	0.000903456	0.0229174	-0.777243
ATXN7L3B	0.270852	5.57361	3.46939	0.000904101	0.0229174	-0.847284
BIN3	-0.352357	5.11391	-3.46913	0.000904845	0.0229174	-0.849554
ALDH18A1	0.391261	3.44649	3.46884	0.000905687	0.0229174	-0.784461
MRPL22	0.675526	1.37959	3.46806	0.000907925	0.0229174	-0.726698
MTIF3	0.411859	3.25985	3.46772	0.000908892	0.0229174	-0.77929
CCT7	0.238919	6.09328	3.46746	0.000909666	0.0229174	-0.847904
RPL27A	0.49105	7.54796	3.46734	0.000909994	0.0229174	-0.818066
SRP72	0.404639	5.18038	3.46706	0.000910796	0.0229174	-0.851826
SLC25A5	0.260014	6.02061	3.46628	0.000913047	0.0229471	-0.852033
ROPN1L	-0.742562	2.71149	-3.46569	0.000914754	0.0229631	-0.764554
ZNF559	0.420191	3.02074	3.46411	0.000919331	0.023051	-0.771338
BZW2	0.292937	3.42891	3.46362	0.000920774	0.0230602	-0.800616
DDX27	0.237832	5.0678	3.46137	0.000927332	0.0231355	-0.868786
LHFPL5	-0.508125	2.62283	-3.46102	0.000928354	0.0231355	-0.768257
HS1BP3	-0.373079	4.61919	-3.46082	0.000928934	0.0231355	-0.867152
RNASEH2B	0.332095	4.43184	3.46043	0.000930088	0.0231355	-0.855806
ALKBH4	-0.286905	3.06928	-3.46038	0.000930241	0.0231355	-0.797401
FUT7	-0.506647	5.2268	-3.46038	0.000930254	0.0231355	-0.875192
SRP14	0.534941	4.93796	3.45867	0.000935273	0.0232031	-0.873631
SNHG8	0.878075	1.72003	3.45848	0.000935842	0.0232031	-0.74612
LBH	0.400556	6.92437	3.45815	0.000936813	0.0232031	-0.860588
ANP32E	0.469577	4.61467	3.45738	0.000939087	0.0232031	-0.867586
GPR141	-0.612744	1.9152	-3.45647	0.000941788	0.0232031	-0.754652
OARD1	0.353919	2.9686	3.45638	0.000942058	0.0232031	-0.793612
CCNC	0.485184	3.35223	3.45622	0.000942545	0.0232031	-0.808712
CCDC59	0.428958	2.78904	3.45563	0.000944288	0.0232031	-0.785911
DHRSX	-0.411629	2.09096	-3.45561	0.00094437	0.0232031	-0.761079
IFT57	0.710602	1.99479	3.45551	0.000944657	0.0232031	-0.753221
POLE3	0.242591	4.57199	3.45544	0.000944877	0.0232031	-0.87642
SBDS	0.428379	3.48362	3.4548	0.000946773	0.023211	-0.82554
RUVBL1	0.278779	3.96144	3.4546	0.000947364	0.023211	-0.855492
ENO2	0.354783	4.12829	3.45401	0.000949146	0.0232281	-0.864462
TCEAL8	0.530986	2.29157	3.4533	0.000951278	0.0232537	-0.77001
COPS8	0.437825	2.93849	3.45189	0.000955515	0.0232913	-0.800329
PDCD2	0.304119	4.22869	3.45169	0.000956119	0.0232913	-0.873728
VASP	-0.547527	8.75455	-3.45099	0.000958228	0.0232913	-0.83593
CHCHD6	0.492048	0.278909	3.45065	0.000959266	0.0232913	-0.861985
ABTB1	-0.548965	8.96992	-3.45057	0.000959486	0.0232913	-0.831807
RXRB	-0.2015	5.681	-3.45049	0.000959753	0.0232913	-0.901614
MAPK3	-0.523506	5.88668	-3.45003	0.000961148	0.0232913	-0.899507
AC243960.1	0.649513	2.2015	3.44957	0.000962518	0.0232913	-0.771884
G3BP1	0.272314	5.8103	3.4492	0.000963644	0.0232913	-0.90395
PDCL3	0.333661	2.6494	3.44919	0.00096368	0.0232913	-0.798477
NOL8	0.389122	4.16932	3.44826	0.0009665	0.0233203	-0.879287
NDUFB5	0.339863	3.95044	3.44775	0.000968066	0.0233203	-0.875161
SNN	-0.431881	7.09773	-3.44773	0.000968145	0.0233203	-0.884225
RPL10	0.417758	9.63855	3.44732	0.000969384	0.023324	-0.828018
P2RX5	0.678853	4.62292	3.44675	0.000971135	0.0233399	-0.889324
SRA1	-0.336308	4.61678	-3.44603	0.000973342	0.0233497	-0.910843
AC104695.3	-0.816399	-0.312358	-3.4459	0.00097372	0.0233497	-0.943812
RAD17	0.369262	3.20665	3.44409	0.000979293	0.0234571	-0.836757
ZNF341	-0.311335	2.97519	-3.44295	0.000982839	0.0234706	-0.841631
PPP4R1L	-0.459561	3.43338	-3.44275	0.000983454	0.0234706	-0.865137
CFDP1	0.423529	3.12903	3.44254	0.00098408	0.0234706	-0.845488
ABCD1	-0.36412	4.17817	-3.44249	0.000984235	0.0234706	-0.905333
LIMD1	0.27008	4.5464	3.44111	0.000988523	0.0235306	-0.913691
MTX1	-0.420316	5.28379	-3.44098	0.000988947	0.0235306	-0.930655
MBLAC2	0.737813	1.30825	3.44049	0.000990482	0.0235375	-0.812503
MRPL15	0.555673	2.2402	3.44018	0.000991434	0.0235375	-0.803367
MIS12	0.427379	3.33491	3.43793	0.00099849	0.0236788	-0.861388
SNU13	0.270968	5.19625	3.43711	0.00100107	0.0237122	-0.939243
FBXL20	-0.280985	5.11222	-3.43668	0.00100241	0.0237122	-0.941981
MSH2	0.427233	3.25278	3.43643	0.00100322	0.0237122	-0.864173
EIF2S1	0.323384	4.01487	3.43578	0.00100526	0.0237341	-0.90841
ALDH3B1	-0.417479	5.27439	-3.43543	0.00100636	0.0237341	-0.946454
TBC1D10B	-0.296129	5.71386	-3.43463	0.00100889	0.0237677	-0.946603
HLA-DPB1	0.508953	7.23975	3.43389	0.00101125	0.0237972	-0.921921
DYNC1I2	0.271921	4.72639	3.43332	0.00101307	0.0238118	-0.942398
DIAPH3	-0.71401	0.340078	-3.433	0.0010141	0.0238118	-0.864511
WDR70	0.319921	3.18539	3.42878	0.00102762	0.024103	-0.883642
AC106028.3	-0.597415	0.186144	-3.42781	0.00103077	0.0241488	-0.917934
PRRC1	0.369795	3.77736	3.42697	0.00103348	0.0241488	-0.916639
TPT1	0.81151	8.94365	3.42653	0.00103491	0.0241488	-0.903115
ARHGAP27	-0.343177	7.74052	-3.4261	0.00103633	0.0241488	-0.930131
EBAG9	0.419589	2.55444	3.42574	0.0010375	0.0241488	-0.854282
PIK3CD-AS1	-0.492525	0.970237	-3.42509	0.00103961	0.0241488	-0.849929
JPT1	-0.434647	6.08019	-3.42495	0.00104007	0.0241488	-0.968529
LSM7	0.533427	3.57078	3.42441	0.00104185	0.0241488	-0.919345
MAP2K3	-0.613636	7.1939	-3.42439	0.00104191	0.0241488	-0.946544
ENTPD1-AS1	-0.362458	3.77851	-3.42424	0.00104239	0.0241488	-0.938666
SHMT2	0.33041	4.84361	3.42387	0.00104361	0.0241488	-0.970947
MRPL1	1.00162	0.62125	3.42376	0.00104398	0.0241488	-0.906777
SEMA4B	-0.373821	6.00346	-3.42368	0.00104422	0.0241488	-0.9747
MRPL50	0.708012	2.1361	3.42315	0.00104596	0.0241549	-0.842606
RPL24	0.655992	6.14781	3.42292	0.00104673	0.0241549	-0.972137
ZBTB32	0.68294	0.640974	3.42196	0.00104986	0.0241776	-0.898791
MRPS16	0.221552	3.95316	3.42193	0.00104998	0.0241776	-0.948761
RPL35A	0.664904	5.902	3.42102	0.00105299	0.0242015	-0.981052
CXCR1	-0.717289	8.87774	-3.4206	0.00105436	0.0242015	-0.91703
KIAA2013	-0.309371	6.02104	-3.42059	0.0010544	0.0242015	-0.982632
SAAL1	0.402546	1.60643	3.41994	0.00105655	0.0242249	-0.849153
PIK3C2B	0.439682	3.65621	3.41946	0.00105814	0.0242354	-0.927588
NAT9	0.263219	3.88928	3.41903	0.00105959	0.0242428	-0.953044
CIC	-0.341785	6.22332	-3.41783	0.00106358	0.0242633	-0.988059
CFLAR	-0.426034	8.59049	-3.41782	0.00106361	0.0242633	-0.934007
PPP1R11	-0.242829	5.52005	-3.41774	0.00106388	0.0242633	-0.995978
CAND1	0.335289	5.00988	3.41697	0.00106645	0.0242701	-0.993132
DNAJC5	-0.329181	6.8396	-3.41649	0.00106805	0.0242701	-0.978266
XPA	0.447916	2.03263	3.41634	0.00106857	0.0242701	-0.8623
PRKCD	-0.481856	7.34229	-3.41629	0.00106871	0.0242701	-0.967644
PDE4DIP	0.280568	4.55669	3.41538	0.00107179	0.0243013	-0.987853
TYW3	0.475383	2.77595	3.41521	0.00107235	0.0243013	-0.893572
CYTH4	-0.367579	8.30037	-3.41436	0.0010752	0.0243403	-0.950049
FUT6	-0.950714	-1.51852	-3.41149	0.00108491	0.0244745	-1.38398
ZDHHC12	-0.348333	4.09542	-3.41133	0.00108546	0.0244745	-0.992023
VSIR	-0.548264	9.38316	-3.4101	0.00108966	0.0244745	-0.935143
PRKACA	-0.462419	6.47628	-3.4099	0.00109033	0.0244745	-1.00445
ESF1	0.619386	2.47945	3.40963	0.00109127	0.0244745	-0.894555
CAMKK2	-0.467605	6.598	-3.40878	0.00109418	0.0244745	-1.00546
MUTYH	0.257892	3.14925	3.40874	0.00109431	0.0244745	-0.939663
NOL11	0.347245	3.88613	3.40849	0.00109517	0.0244745	-0.979425
NIP7	0.252163	3.35583	3.40782	0.00109745	0.0244745	-0.952519
EIF4E	0.331621	4.06522	3.40728	0.00109934	0.0244745	-0.993481
SELL	-0.530791	9.94079	-3.40721	0.00109956	0.0244745	-0.93128
UNG	0.362113	2.91268	3.40708	0.00110002	0.0244745	-0.925366
POP5	0.395437	2.63441	3.40665	0.00110149	0.0244745	-0.91299
CIAO2B	0.309289	3.53478	3.40654	0.00110189	0.0244745	-0.96894
HSH2D	-0.4546	7.11936	-3.40615	0.00110321	0.0244745	-1.00088
AC007877.1	-0.812299	0.955903	-3.40578	0.00110449	0.0244745	-0.898161
IFITM2	-0.768837	10.0211	-3.40571	0.00110473	0.0244745	-0.932138
SYNCRIP	0.329077	5.48071	3.40552	0.0011054	0.0244745	-1.02925
AC079822.1	-0.840076	-1.58683	-3.40541	0.00110579	0.0244745	-1.48455
ATP5PO	0.621179	3.84862	3.40509	0.0011069	0.0244745	-0.990161
FASTKD2	0.33794	3.51686	3.40489	0.00110757	0.0244745	-0.968312
RWDD1	0.685501	2.61522	3.40484	0.00110776	0.0244745	-0.915967
MGAM	-0.813703	7.07393	-3.40441	0.00110926	0.0244745	-1.00761
ZNF227	0.338594	3.18937	3.40418	0.00111005	0.0244745	-0.950698
DHRS7B	-0.324262	3.00527	-3.40417	0.00111007	0.0244745	-0.952159
TAF11L2	-1.35235	-2.66323	-3.40396	0.00111081	0.0244745	-2.01752
AL161431.1	-0.60967	2.48569	-3.40361	0.00111202	0.0244759	-0.922694
S1PR4	-0.361773	7.43309	-3.40249	0.00111591	0.0245364	-1.00302
SHOC1	-0.731231	0.594978	-3.40215	0.0011171	0.0245374	-0.941537
HELZ2	-0.534712	6.41931	-3.40125	0.00112025	0.0245813	-1.0306
KIF11	0.59283	0.952129	3.40045	0.00112308	0.0245901	-0.927115
B3GNTL1	-0.498283	3.83385	-3.40039	0.00112328	0.0245901	-1.01151
SMARCAD1	0.521392	3.16963	3.40009	0.00112434	0.0245901	-0.950948
SAE1	0.22316	4.74615	3.39983	0.00112524	0.0245901	-1.03965
GLI1	-0.648029	2.41379	-3.39941	0.00112671	0.0245972	-0.931393
RETREG2	-0.375535	6.58874	-3.39863	0.0011295	0.0246297	-1.03445
FXR1	0.378179	4.85219	3.39815	0.00113119	0.0246297	-1.04418
ELP5	0.239222	3.41799	3.39802	0.00113165	0.0246297	-0.986744
ORC5	0.384136	2.27554	3.39709	0.00113493	0.0246654	-0.923484
PPM1M	-0.275382	6.29405	-3.3969	0.00113559	0.0246654	-1.0451
RPS6KA1	-0.383665	7.78646	-3.39639	0.00113742	0.0246771	-1.01226
TREML1	-1.19224	3.48255	-3.39601	0.00113877	0.0246771	-1.01323
SMIM19	0.381077	2.13464	3.39578	0.00113958	0.0246771	-0.921133
AC015871.1	-0.495462	3.47652	-3.39452	0.00114407	0.0247387	-1.00807
TRMT10C	0.562263	2.39131	3.39434	0.00114473	0.0247387	-0.933524
SNX5	0.288075	5.05626	3.39398	0.00114603	0.0247418	-1.05945
THOC2	0.215085	5.14826	3.39273	0.0011505	0.0248132	-1.06488
EPN1	-0.340953	6.08407	-3.39159	0.00115459	0.0248765	-1.06359
NUP133	0.274661	4.09462	3.39072	0.00115776	0.0249196	-1.039
MXD1	-0.591001	8.7091	-3.38987	0.00116081	0.0249603	-1.0089
LILRA6	-0.684207	5.92434	-3.38921	0.0011632	0.0249667	-1.07128
NEIL2	0.379993	2.57577	3.38915	0.00116343	0.0249667	-0.957306
RBM26	0.321989	5.20543	3.38658	0.0011728	0.0251184	-1.08129
CCNB1IP1	0.393901	2.64438	3.3864	0.00117344	0.0251184	-0.967743
PDS5A	0.332012	5.37834	3.38624	0.00117405	0.0251184	-1.08337
RNF130	-0.38788	7.36508	-3.38593	0.00117519	0.0251184	-1.0521
STEAP4	-0.622728	7.20153	-3.38498	0.00117865	0.0251322	-1.05915
PDLIM1P4	-0.991438	-0.918406	-3.38472	0.00117961	0.0251322	-1.26293
EIF3F	0.284694	6.52545	3.38459	0.0011801	0.0251322	-1.07575
HSPA4	0.202521	5.49737	3.38447	0.00118052	0.0251322	-1.08933
AKR1B1	0.297777	4.52035	3.3792	0.00120009	0.0255234	-1.09167
ZBTB24	0.311265	3.49501	3.37863	0.00120224	0.0255249	-1.03682
RPS25	0.664217	6.56706	3.37854	0.00120254	0.0255249	-1.08937
SPDL1	0.660767	1.12663	3.37674	0.00120932	0.0255504	-0.982
HMGB1	0.499492	6.41445	3.37635	0.00121081	0.0255504	-1.10177
PARP2	0.33481	1.94694	3.37614	0.00121157	0.0255504	-0.970129
SUCLG2	0.316532	4.04891	3.37589	0.00121251	0.0255504	-1.07863
AC018755.2	-0.856844	5.07053	-3.37589	0.00121251	0.0255504	-1.1143
TMEM50B	0.408006	4.48937	3.37589	0.00121254	0.0255504	-1.09477
TMBIM1	-0.288638	6.86715	-3.37582	0.00121278	0.0255504	-1.09264
AC093726.1	1.15	-0.824398	3.37569	0.00121328	0.0255504	-1.36468
SHKBP1	-0.547656	7.63281	-3.37474	0.00121686	0.0256006	-1.07568
PGLYRP1	-1.0777	3.86212	-3.37405	0.00121948	0.0256306	-1.09132
MIDN	-0.434186	6.88284	-3.37334	0.00122221	0.0256528	-1.09914
MRPS18C	0.683871	2.39751	3.37314	0.00122297	0.0256528	-0.989769
ZFAND3	-0.380018	6.1661	-3.37283	0.00122412	0.0256528	-1.11549
RXRA	-0.454103	7.73209	-3.37171	0.00122839	0.0256915	-1.08296
BTNL8	-0.725076	3.93775	-3.37162	0.00122876	0.0256915	-1.09965
DEF8	-0.433329	7.06105	-3.37141	0.00122957	0.0256915	-1.10026
RPL14	0.353279	8.26147	3.37031	0.00123376	0.0257539	-1.07426
LIG1	0.338199	4.09134	3.36991	0.00123531	0.0257612	-1.0997
DGAT1	-0.302815	5.38374	-3.36957	0.00123661	0.0257634	-1.13273
FLOT1	-0.46238	7.11638	-3.36875	0.00123979	0.0258044	-1.10627
GCFC2	0.442662	2.47545	3.36828	0.0012416	0.025809	-1.00438
TMEM121B	-0.752611	3.3586	-3.36806	0.00124241	0.025809	-1.07558
BCL11A	0.501974	3.73152	3.36657	0.00124821	0.0258605	-1.07815
ATIC	0.311512	4.33406	3.36653	0.00124835	0.0258605	-1.11865
ADAM8	-0.491576	8.23942	-3.36649	0.00124851	0.0258605	-1.08463
NDUFC2	0.298439	4.5242	3.36481	0.00125504	0.0259705	-1.13298
LY6G6E	-1.50334	-2.33001	-3.36381	0.00125894	0.0260154	-1.81408
FAM114A1	-0.479382	0.708805	-3.36364	0.00125963	0.0260154	-1.02613
GTF2E2	0.311669	3.38474	3.36269	0.00126335	0.026055	-1.07997
SMIM3	-0.442016	3.10478	-3.36253	0.00126398	0.026055	-1.07902
ETV6	-0.311934	5.64331	-3.36171	0.00126719	0.0260809	-1.15332
CFAP161	-1.44864	-1.56368	-3.36159	0.00126767	0.0260809	-1.50624
RBMX	0.316375	6.23743	3.36096	0.00127016	0.0260832	-1.14858
ENY2	0.369976	3.30317	3.36094	0.00127021	0.0260832	-1.08074
HINT1	0.876522	3.91006	3.36021	0.0012731	0.0261174	-1.1084
MAPKAPK2	-0.344098	6.51617	-3.35808	0.00128156	0.0262492	-1.14933
MCOLN1	-0.568936	4.52667	-3.35798	0.00128197	0.0262492	-1.15653
KIF22	0.283852	4.50289	3.35538	0.00129234	0.0264361	-1.15773
RAB5C	-0.333407	6.90232	-3.35496	0.00129401	0.0264451	-1.15027
ZYX	-0.638365	8.47011	-3.35443	0.00129614	0.0264573	-1.11145
AC002094.1	-2.37514	-3.53831	-3.3536	0.00129948	0.0264573	-2.39671
CYREN	-0.389363	4.79013	-3.35328	0.00130079	0.0264573	-1.17541
PMPCB	0.23737	4.63312	3.35324	0.00130095	0.0264573	-1.16707
PYURF	0.447009	4.14141	3.35299	0.00130195	0.0264573	-1.1461
TMA16	0.453814	1.68933	3.35281	0.00130269	0.0264573	-1.02654
CCDC71L	-0.471774	3.97647	-3.35191	0.00130633	0.0264573	-1.15306
RPS5	0.482786	7.64244	3.35188	0.00130645	0.0264573	-1.14059
ABHD4	-0.427711	4.71941	-3.35168	0.00130727	0.0264573	-1.17829
IDH3A	0.296999	3.79155	3.35151	0.00130795	0.0264573	-1.13358
ARHGAP26	-0.477473	6.76687	-3.35145	0.00130821	0.0264573	-1.16445
PTPRE	-0.346089	6.76922	-3.35105	0.00130981	0.0264573	-1.16482
NADK2	0.36279	2.39626	3.35045	0.00131226	0.0264573	-1.0523
CD79A	0.722609	6.10676	3.34995	0.00131429	0.0264573	-1.18234
PDCL	0.245731	3.08778	3.34946	0.0013163	0.0264573	-1.09581
SUPT16H	0.225042	5.64384	3.34925	0.00131713	0.0264573	-1.18777
PRSS51	-1.09095	-2.33716	-3.34899	0.00131821	0.0264573	-1.95471
PHC2	-0.695663	7.7198	-3.34895	0.00131836	0.0264573	-1.14457
DUSP28	0.316769	2.32942	3.34859	0.00131984	0.0264573	-1.05741
FAM133B	0.341474	3.55598	3.34779	0.0013231	0.0264573	-1.12978
MBOAT2	-0.52593	4.43417	-3.34774	0.00132331	0.0264573	-1.1801
ADAP1	-0.365256	5.59757	-3.34736	0.00132489	0.0264573	-1.19407
PPA1	0.531421	3.79531	3.34726	0.00132529	0.0264573	-1.1449
AP002381.2	-0.55244	2.20779	-3.34713	0.00132581	0.0264573	-1.06382
SASH3	-0.223487	7.63535	-3.34713	0.00132582	0.0264573	-1.15412
UBA5	0.390185	3.2084	3.34692	0.00132669	0.0264573	-1.10617
ZNF287	0.490451	1.2095	3.34629	0.00132927	0.0264576	-1.04794
RELT	-0.340031	5.93588	-3.34585	0.00133107	0.0264576	-1.1951
NINJ1	-0.546663	6.86558	-3.34583	0.00133118	0.0264576	-1.17488
DNAJC21	0.326535	3.91203	3.34572	0.00133164	0.0264576	-1.1544
CCDC43	0.371498	2.5849	3.34539	0.00133297	0.0264595	-1.07609
ACOX1	-0.484869	6.34633	-3.34466	0.001336	0.0264646	-1.19016
NDUFAF6	0.420412	1.49723	3.34466	0.00133603	0.0264646	-1.04869
GP9	-1.1183	2.65155	-3.34444	0.00133694	0.0264646	-1.1078
SUCLA2	0.405465	2.88707	3.34315	0.00134225	0.0265454	-1.10046
PDRG1	0.272635	2.97256	3.34208	0.0013467	0.0266088	-1.11331
AF228727.1	-0.636655	1.47134	-3.3409	0.00135164	0.0266506	-1.05769
PREP	0.241999	4.24888	3.34072	0.00135242	0.0266506	-1.18881
LILRA1	-0.398585	6.07417	-3.34062	0.0013528	0.0266506	-1.20769
CHMP1A	-0.285303	6.16959	-3.34039	0.00135379	0.0266506	-1.20583
BIN2	-0.289133	8.11825	-3.33991	0.00135578	0.0266654	-1.16091
PCID2	0.386943	4.12098	3.33813	0.00136327	0.0267774	-1.1861
PNRC2	0.415839	5.85852	3.33797	0.00136398	0.0267774	-1.21749
AL023875.1	-0.315238	4.03634	-3.33691	0.00136845	0.0268406	-1.1982
ZFP37	0.708408	-0.176623	3.33601	0.00137226	0.0268673	-1.22067
FRAT2	-0.55532	7.92567	-3.33599	0.00137231	0.0268673	-1.17799
NSA2	0.485824	4.69268	3.33442	0.00137903	0.026974	-1.21955
TPRKB	0.568266	1.38894	3.33226	0.00138826	0.0271299	-1.0815
EFHD2	-0.373419	8.83978	-3.33101	0.00139361	0.0272097	-1.16837
CCAR1	0.28446	4.94112	3.32924	0.00140126	0.0272802	-1.23943
NMNAT1	-0.270317	3.36685	-3.32897	0.00140242	0.0272802	-1.18007
ZNF549	0.378122	2.84533	3.32882	0.00140309	0.0272802	-1.13466
TOP3A	-0.2855	5.15906	-3.32869	0.00140362	0.0272802	-1.24679
HCAR3	-0.622184	5.8364	-3.3286	0.00140403	0.0272802	-1.24474
ZNF625	1.4258	-1.66397	3.3282	0.00140576	0.0272802	-1.73007
POLE4	0.589362	2.60113	3.32812	0.00140613	0.0272802	-1.1253
APBB1IP	-0.515166	7.55911	-3.32673	0.00141216	0.0273498	-1.21188
CASC3	-0.375987	6.91277	-3.3267	0.00141227	0.0273498	-1.2289
METTL23	0.298402	3.30713	3.32606	0.00141509	0.0273797	-1.17575
AC016957.2	-0.461389	1.86917	-3.32529	0.00141846	0.0274201	-1.10719
CSNK1D	-0.278444	7.32153	-3.32481	0.00142056	0.0274325	-1.224
RAB19	-1.09669	-1.74004	-3.32456	0.00142166	0.0274325	-1.71168
TCEAL1	0.764001	0.501918	3.32299	0.00142854	0.0275405	-1.17642
ARHGAP27P1-BPTFP1-KPNA2P3	-0.369911	4.32244	-3.32065	0.00143889	0.0276589	-1.25337
CNOT9	0.196333	4.64342	3.32056	0.00143928	0.0276589	-1.25771
RPL26	1.33323	4.35552	3.32053	0.00143944	0.0276589	-1.23547
MAEA	-0.327893	6.11241	-3.31991	0.0014422	0.0276589	-1.26455
GPR27	-0.64378	4.31589	-3.31981	0.00144264	0.0276589	-1.25334
WWP1	0.389976	4.17946	3.31907	0.00144591	0.0276589	-1.2395
RAB3D	-0.568726	6.84884	-3.31901	0.00144619	0.0276589	-1.25079
RPL34	1.6604	3.29507	3.31898	0.00144632	0.0276589	-1.17216
MRPL32	0.662885	2.34197	3.3183	0.00144935	0.0276589	-1.13486
CCDC115	0.215139	4.56299	3.31804	0.00145053	0.0276589	-1.26362
AL365361.1	0.522254	4.26296	3.3178	0.00145161	0.0276589	-1.24414
THOC3	0.512874	3.09265	3.31759	0.00145255	0.0276589	-1.18252
BASP1	-0.73186	8.17967	-3.31758	0.00145257	0.0276589	-1.22214
TRIAP1	0.667373	1.58848	3.31745	0.00145318	0.0276589	-1.11887
CCDC69	-0.200954	6.91276	-3.3172	0.00145428	0.0276589	-1.25464
SEH1L	0.276842	3.43616	3.31697	0.00145533	0.0276589	-1.2074
ZDHHC7	-0.262496	6.35588	-3.31657	0.00145709	0.027668	-1.26933
TKT	-0.497058	8.95837	-3.31387	0.00146928	0.0278648	-1.21186
CKS2	1.16669	-0.487472	3.31368	0.00147013	0.0278648	-1.43282
HNRNPA3	0.199509	7.12031	3.31341	0.00147136	0.0278648	-1.2626
WDFY3	-0.616172	5.24093	-3.31261	0.001475	0.0278977	-1.29185
PPP1R3B	-0.568563	6.10069	-3.31245	0.0014757	0.0278977	-1.28512
REPS2	-0.666749	4.78733	-3.31201	0.0014777	0.0279109	-1.28933
TULP4	0.368267	2.88482	3.31118	0.0014815	0.0279581	-1.18314
CREB5	-0.636076	6.45305	-3.31067	0.00148383	0.0279752	-1.28471
STXBP2	-0.444822	7.55382	-3.3103	0.00148551	0.0279752	-1.25668
CNOT7	0.276436	5.36209	3.30983	0.00148766	0.0279752	-1.29777
MAN2A2	-0.384314	6.57894	-3.30937	0.00148977	0.0279752	-1.28406
GNB5	0.28122	3.84279	3.30928	0.00149017	0.0279752	-1.25206
RAC2	-0.347544	8.80611	-3.30927	0.00149024	0.0279752	-1.22881
EIF3D	0.227641	6.54754	3.30866	0.00149304	0.0280033	-1.2869
AVEN	0.38361	1.51073	3.30766	0.00149762	0.028043	-1.14425
EEF1A1P19	0.811893	-0.519086	3.30763	0.00149777	0.028043	-1.37676
ABHD10	0.481839	3.28229	3.30669	0.00150211	0.0280879	-1.22007
ATXN10	0.302726	4.33542	3.3065	0.00150298	0.0280879	-1.28602
SNRPE	0.760499	1.66811	3.30626	0.0015041	0.0280879	-1.1486
CA4	-0.917467	3.40149	-3.3053	0.00150855	0.0281466	-1.26103
IQCB1	0.504229	3.35987	3.30442	0.00151261	0.0281977	-1.22761
MBOAT7	-0.643511	8.27933	-3.30364	0.00151627	0.0282414	-1.25728
ATL2	0.374552	3.16811	3.30083	0.00152942	0.0284366	-1.23104
RPS29	0.773648	5.4779	3.30076	0.00152976	0.0284366	-1.31978
HSP90AB1	0.325151	7.69429	3.30028	0.00153199	0.0284366	-1.28452
PGS1	-0.397231	6.06848	-3.30027	0.00153206	0.0284366	-1.31937
CPNE2	-0.443901	4.25224	-3.29995	0.00153356	0.0284398	-1.30804
SCN1B	-0.627969	2.02544	-3.29778	0.00154381	0.0285668	-1.19098
UNC119	-0.34395	6.04443	-3.29774	0.001544	0.0285668	-1.3264
TTC5	0.343702	2.83735	3.29765	0.0015444	0.0285668	-1.21753
GFOD2	-0.257587	4.27094	-3.29664	0.00154924	0.0286315	-1.31679
SEPHS1	0.258533	3.49709	3.29565	0.00155393	0.0286935	-1.27207
USP4	-0.295641	6.73414	-3.29507	0.00155668	0.0286952	-1.32119
ADAMTSL4	-0.538541	5.05375	-3.29433	0.00156024	0.0286952	-1.34221
ZSWIM8	-0.285692	6.05901	-3.29421	0.0015608	0.0286952	-1.33639
ABRAXAS2	0.250058	3.34605	3.29419	0.0015609	0.0286952	-1.26425
SRSF7	0.436781	5.64009	3.29419	0.00156094	0.0286952	-1.34008
HIBCH	0.350618	2.31931	3.29395	0.00156205	0.0286952	-1.20102
TAF6L	0.302171	2.75101	3.29262	0.00156844	0.0287879	-1.23364
OPRL1	-0.435237	3.68587	-3.29136	0.00157455	0.0288753	-1.30799
TNFRSF10C	-0.644206	8.08309	-3.28997	0.00158128	0.0289738	-1.30201
CSF2RA	-0.472798	4.89461	-3.28864	0.00158771	0.0290095	-1.35643
BTLA	0.793064	2.6322	3.28861	0.00158787	0.0290095	-1.21611
CSE1L	0.310929	4.25321	3.28853	0.00158825	0.0290095	-1.3301
ADSL	0.265605	4.29284	3.28835	0.00158915	0.0290095	-1.3365
SLC6A6	-0.475799	8.08446	-3.288	0.00159084	0.0290095	-1.30647
HIST1H2BF	-1.23091	-1.6427	-3.28781	0.00159176	0.0290095	-1.73516
SMARCE1	0.223091	5.52233	3.28741	0.0015937	0.0290095	-1.36016
TRAM1	0.379906	6.14272	3.28734	0.00159405	0.0290095	-1.35525
LTV1	0.388866	3.11513	3.28645	0.00159843	0.0290262	-1.27196
RPS15A	0.984832	6.24629	3.28623	0.00159947	0.0290262	-1.35328
ZFP36L1	-0.368633	7.9377	-3.28609	0.00160018	0.0290262	-1.31699
LINC02352	-0.478185	1.75937	-3.28605	0.00160038	0.0290262	-1.20569
UBE2G2	0.251991	5.79335	3.28545	0.00160331	0.0290388	-1.36377
FMNL1	-0.426872	8.8684	-3.28535	0.00160379	0.0290388	-1.29246
PLEKHO2	-0.472803	7.27541	-3.28439	0.00160854	0.0290705	-1.33572
CMPK1	0.433275	5.42888	3.28385	0.00161119	0.0290705	-1.36879
C12orf66	0.436386	1.80516	3.28379	0.00161151	0.0290705	-1.20854
IQSEC1	-0.3463	7.57261	-3.28375	0.00161166	0.0290705	-1.33193
PDCD5	0.361358	2.72102	3.28362	0.00161231	0.0290705	-1.25228
IER3IP1	0.476664	2.76534	3.28325	0.00161415	0.0290791	-1.25391
NSD2	0.290078	4.18787	3.28281	0.00161632	0.0290937	-1.34423
ZNF516	-0.478293	5.67589	-3.28186	0.00162106	0.029099	-1.37594
CHIC1	0.572375	2.18094	3.28185	0.0016211	0.029099	-1.22072
HMGN3	0.439581	2.91715	3.28162	0.00162223	0.029099	-1.27042
USP28	0.361612	4.11977	3.28098	0.0016254	0.029099	-1.34357
CARNMT1	0.539848	2.28177	3.2809	0.00162582	0.029099	-1.23036
MAFG	-0.308019	4.50396	-3.28034	0.0016286	0.029099	-1.37043
COQ3	0.653105	0.0674208	3.28024	0.00162911	0.029099	-1.31085
SERBP1	0.221666	6.68733	3.2801	0.00162977	0.029099	-1.364
GPN3	0.448933	2.29192	3.28006	0.00163002	0.029099	-1.23495
TNFRSF13B	0.954837	1.37693	3.27937	0.00163342	0.029099	-1.22167
STARD3	-0.209656	5.73636	-3.27892	0.00163569	0.029099	-1.38271
RARA-AS1	-0.587132	3.05477	-3.27887	0.00163593	0.029099	-1.30164
AC244154.1	-0.691286	2.05081	-3.27873	0.00163663	0.029099	-1.22999
CETN3	1.08245	-0.500246	3.27872	0.00163667	0.029099	-1.4657
DUT	0.479576	4.09658	3.27831	0.00163876	0.029099	-1.3489
EXOC7	-0.183297	6.30933	-3.2783	0.00163881	0.029099	-1.37626
RPS19	0.370964	8.23323	3.27812	0.00163969	0.029099	-1.32885
PISD	-0.47175	6.71904	-3.27712	0.00164472	0.0291392	-1.36931
CRY1	0.386686	2.71602	3.27694	0.00164565	0.0291392	-1.26504
ACSS3	-0.553905	1.67509	-3.27651	0.0016478	0.0291392	-1.22984
RBL1	0.396172	2.58144	3.27642	0.00164824	0.0291392	-1.25875
MRPL9	0.341548	3.63352	3.27632	0.00164875	0.0291392	-1.33419
ZC3H3	-0.343058	4.60092	-3.27604	0.00165016	0.0291401	-1.38489
ZNF30	0.59299	0.832768	3.27492	0.00165583	0.0292064	-1.25418
SIPA1	-0.3063	7.6392	-3.27451	0.00165788	0.0292064	-1.35404
PRPF40B	0.516998	1.29157	3.27449	0.001658	0.0292064	-1.231
ERGIC1	-0.486685	7.44741	-3.27328	0.00166416	0.0292909	-1.36199
MRPS28	0.788328	0.712343	3.27274	0.0016669	0.0293151	-1.26232
NOP16	0.327477	2.4933	3.27218	0.00166976	0.0293413	-1.27119
HSP90B1	0.336596	6.94358	3.27155	0.00167298	0.0293737	-1.38194
NEK10	-1.20747	-2.16076	-3.27069	0.00167738	0.0294269	-2.0839
RPF1	0.480667	3.30474	3.26998	0.00168102	0.0294666	-1.32584
AKAP7	0.539088	1.80544	3.26946	0.00168371	0.029472	-1.24494
ATP5MD	0.523915	2.69457	3.26939	0.00168408	0.029472	-1.2936
GPATCH11	0.54175	2.98714	3.26792	0.00169165	0.0295406	-1.30248
CCDC34	0.546998	0.10718	3.26779	0.00169232	0.0295406	-1.31903
ZFP14	0.42462	2.77009	3.2677	0.00169275	0.0295406	-1.29003
AC004825.3	-0.689096	-0.345894	-3.26756	0.00169351	0.0295406	-1.40388
SPOUT1	0.244406	4.373	3.26725	0.0016951	0.029544	-1.39774
CBX5	0.306894	4.75154	3.26671	0.00169789	0.029544	-1.40864
STAT6	-0.336209	8.57317	-3.26646	0.00169922	0.029544	-1.35219
ZNF706	0.258206	4.26341	3.26621	0.0017005	0.029544	-1.39375
MRPL45	0.35336	2.87308	3.26594	0.0017019	0.029544	-1.31273
GRK6	-0.26828	7.58999	-3.26593	0.00170197	0.029544	-1.37915
MRPS30	0.34337	3.20811	3.26561	0.00170363	0.0295488	-1.33068
SIT1	0.375729	4.64625	3.26504	0.00170656	0.0295654	-1.41123
LINC01179	-1.05728	-2.24255	-3.26472	0.00170824	0.0295654	-1.99147
FGR	-0.372633	8.65794	-3.26463	0.00170872	0.0295654	-1.3551
KLRB1	0.834172	3.12682	3.26398	0.00171213	0.0296005	-1.31932
ARL11	-0.362945	4.48155	-3.26356	0.00171428	0.0296019	-1.4151
MRPL35	0.384028	2.92787	3.26318	0.00171632	0.0296019	-1.3208
CCNJL	-0.748695	5.28763	-3.26317	0.00171635	0.0296019	-1.42863
RPS27A	0.694409	6.77254	3.26218	0.00172156	0.0296602	-1.4074
SP4	0.476309	3.27379	3.262	0.0017225	0.0296602	-1.33531
QRSL1	0.41349	3.27802	3.26098	0.00172786	0.0297287	-1.34086
KLHL18	-0.241517	4.21281	-3.26043	0.00173073	0.0297442	-1.41421
ZNF419	0.315645	2.88812	3.26028	0.00173154	0.0297442	-1.32451
TAF1B	0.3924	1.83752	3.25937	0.00173634	0.0298002	-1.27234
TNK2	-0.215174	6.75743	-3.25888	0.00173893	0.0298002	-1.41968
TASP1	0.403262	1.46659	3.25888	0.00173897	0.0298002	-1.26989
GLIPR2	-0.392715	7.28564	-3.25832	0.00174192	0.0298269	-1.40627
SRPK1	-0.495911	5.55265	-3.25764	0.00174555	0.0298652	-1.44338
ZSCAN12	0.539153	1.45041	3.25704	0.00174873	0.0298903	-1.27523
ZNF646	-0.259265	5.36607	-3.25684	0.0017498	0.0298903	-1.44607
LDAH	0.388355	2.22874	3.25437	0.001763	0.0300917	-1.30067
FAM204A	0.33726	3.55796	3.25389	0.00176561	0.0301123	-1.38972
COX7A2	0.695118	3.51305	3.25299	0.00177046	0.03015	-1.38302
PBX2	-0.342056	7.32825	-3.25273	0.00177185	0.03015	-1.42224
UPF3B	0.350201	3.39262	3.25248	0.00177318	0.03015	-1.3848
SNRPG	1.03668	1.24482	3.25243	0.00177345	0.03015	-1.2905
SLCO3A1	-0.418035	5.99807	-3.25145	0.00177878	0.030203	-1.455
NRDC	-0.297253	6.91091	-3.25113	0.00178051	0.030203	-1.43676
LINC02054	-0.612305	1.06945	-3.25108	0.00178079	0.030203	-1.29164
GTPBP8	0.395126	1.88901	3.25003	0.00178647	0.0302646	-1.29924
RPL8	0.387006	8.87209	3.24989	0.00178725	0.0302646	-1.38933
TMEM127	-0.39855	6.91073	-3.24804	0.00179733	0.030403	-1.44445
RPL9	1.20163	5.20098	3.24787	0.00179826	0.030403	-1.45738
PTTG1IP	-0.305916	6.75781	-3.24734	0.00180114	0.0304278	-1.4513
PSMD10	0.451797	3.04527	3.24686	0.0018038	0.0304488	-1.36889
NDUFA9	0.26677	4.05733	3.24641	0.00180625	0.0304661	-1.44439
HSPE1	0.704747	2.3552	3.24514	0.00181328	0.0305606	-1.33396
MICOS13	0.395168	2.678	3.24434	0.00181768	0.0306107	-1.35935
LARP7	0.496934	3.7456	3.24313	0.00182438	0.0306995	-1.43208
AC073111.4	0.330845	3.92497	3.24227	0.00182912	0.0307551	-1.44315
REM2	-0.625281	3.91074	-3.24031	0.00184008	0.0309151	-1.46168
PIM3	-0.400491	5.89061	-3.2396	0.00184407	0.0309579	-1.48963
UBXN2B	-0.451094	5.65295	-3.23867	0.00184924	0.0310204	-1.49433
ELP4	0.27737	2.52506	3.23795	0.00185331	0.0310464	-1.36248
SMYD4	0.279553	3.63573	3.23788	0.00185369	0.0310464	-1.43603
TALDO1	-0.541477	8.55414	-3.23755	0.00185557	0.0310536	-1.42929
DNAJC24	0.398644	2.61806	3.23623	0.00186303	0.0311443	-1.36775
TMEM209	0.388026	2.73768	3.23586	0.0018651	0.0311443	-1.37344
NDUFA5	0.803728	2.19891	3.23567	0.00186618	0.0311443	-1.34622
SH3GL1	-0.282861	5.09732	-3.23533	0.00186809	0.0311443	-1.50435
NCF1B	-0.602635	7.13726	-3.23523	0.00186869	0.0311443	-1.47321
TIMMDC1	0.292995	3.899	3.23479	0.0018712	0.0311443	-1.4619
AC093599.2	-1.2372	-1.76702	-3.23433	0.0018738	0.0311443	-1.83898
TIMM10B	0.308843	3.71517	3.2341	0.00187509	0.0311443	-1.45276
AL355816.2	0.531488	1.81777	3.23403	0.0018755	0.0311443	-1.33883
GEMIN8	0.318311	1.96103	3.23403	0.00187552	0.0311443	-1.34538
ZNF540	0.559573	1.61563	3.23358	0.00187806	0.0311454	-1.33552
SPOCD1	-1.02085	0.963425	-3.23305	0.00188108	0.0311454	-1.33582
STK40	-0.447289	7.47698	-3.23301	0.0018813	0.0311454	-1.47122
AC015802.1	-0.765447	1.39195	-3.233	0.00188139	0.0311454	-1.33647
TSPYL1	0.23459	5.52974	3.23265	0.0018834	0.0311545	-1.51059
OSBPL2	-0.379563	6.08986	-3.23193	0.00188751	0.0311725	-1.50671
LY6G6F	-0.967405	0.63615	-3.23178	0.00188833	0.0311725	-1.34284
NUMB	-0.477436	7.29853	-3.23154	0.00188973	0.0311725	-1.48147
AL359762.3	-0.612398	2.00461	-3.23144	0.0018903	0.0311725	-1.35707
SELPLG	-0.495775	8.4687	-3.23098	0.00189294	0.0311739	-1.44962
PLB1	-0.758741	3.88645	-3.23092	0.0018933	0.0311739	-1.48396
DNAJC1	0.348871	3.1434	3.23055	0.00189541	0.0311848	-1.42925
ARHGEF9	0.272022	3.26917	3.22938	0.00190214	0.0312296	-1.43558
AC092145.1	-0.614027	2.03158	-3.2292	0.00190319	0.0312296	-1.36655
PCNX1	-0.391014	6.37969	-3.22901	0.00190428	0.0312296	-1.50978
RARS	0.340564	3.70982	3.2289	0.00190494	0.0312296	-1.46704
TSEN34	-0.499371	5.89323	-3.22881	0.00190542	0.0312296	-1.51793
CYP1B1-AS1	-0.49183	1.60499	-3.22795	0.00191039	0.0312872	-1.35285
LRR1	0.459862	1.64642	3.22739	0.00191366	0.0313017	-1.35212
AL359532.1	-0.673387	-0.556325	-3.2273	0.0019142	0.0313017	-1.50466
HCG27	-0.5683	5.84863	-3.2264	0.0019194	0.0313629	-1.52484
CENPH	0.480575	0.644015	3.22594	0.00192211	0.0313832	-1.37961
CRISPLD2	-0.709515	6.05613	-3.22566	0.00192371	0.0313854	-1.52438
AGPAT2	-0.389446	4.59629	-3.22513	0.00192683	0.0314124	-1.52553
CDC42EP3	-0.38623	6.39852	-3.22476	0.00192898	0.0314236	-1.52195
ZNF17	0.415996	1.48534	3.22393	0.00193383	0.0314787	-1.35893
DRC7	-0.763704	-0.973731	-3.2219	0.00194574	0.0316486	-1.61103
LITAF	-0.54278	9.41565	-3.22159	0.00194756	0.031651	-1.45096
Z93930.2	0.707941	-1.33442	3.22138	0.00194884	0.031651	-1.75524
OR2AH1P	-1.0062	-2.38348	-3.22013	0.00195621	0.0317466	-2.16022
TMEM11	-0.287391	3.22095	-3.21978	0.00195829	0.0317562	-1.47003
UMPS	0.33328	3.01449	3.219	0.00196292	0.0317653	-1.44588
ABR	-0.281029	6.57282	-3.21899	0.00196295	0.0317653	-1.53278
AL627309.5	-0.787662	6.28138	-3.21894	0.00196329	0.0317653	-1.53914
RPS23	0.709063	7.52599	3.21816	0.00196793	0.0317839	-1.50831
HMGN1	0.34836	5.85856	3.21812	0.00196817	0.0317839	-1.54765
TSN	0.285468	4.62833	3.21798	0.00196898	0.0317839	-1.53783
SEMG1	-1.55588	-2.53145	-3.21759	0.00197133	0.0317839	-2.17489
PSMA2	0.717871	3.51502	3.2175	0.00197185	0.0317839	-1.47994
COIL	0.338027	2.84029	3.21614	0.00197996	0.0318787	-1.44104
CCDC102A	0.409068	2.24331	3.21597	0.00198098	0.0318787	-1.4025
BHLHE41	0.802286	0.302921	3.21549	0.00198386	0.0318787	-1.4556
TACC3	-0.366952	6.98305	-3.21468	0.00198874	0.0318787	-1.5338
MRPL17	0.406544	2.26326	3.21411	0.00199217	0.0318787	-1.41189
HNRNPA2B1	0.198298	8.29108	3.21392	0.00199328	0.0318787	-1.50401
MAP1LC3A	-0.638644	2.54884	-3.21373	0.00199445	0.0318787	-1.44252
PIN4	0.581473	0.886613	3.21348	0.00199595	0.0318787	-1.39287
EIF2B3	0.384322	1.89072	3.21345	0.00199617	0.0318787	-1.39634
G6PD	-0.515796	6.68522	-3.21341	0.00199639	0.0318787	-1.54317
PPIAP53	-0.464974	1.47375	-3.21332	0.0019969	0.0318787	-1.38969
PINK1	-0.586529	6.66226	-3.21329	0.00199712	0.0318787	-1.54458
TRIM4	0.277593	4.42042	3.2131	0.00199825	0.0318787	-1.54268
METTL5	0.413932	1.88422	3.21305	0.00199855	0.0318787	-1.39803
PDE12	0.241137	3.70317	3.21276	0.00200028	0.0318825	-1.50952
KDM4C	0.265359	4.42565	3.21214	0.00200408	0.0319162	-1.54725
CUEDC1	-0.437242	4.23159	-3.21184	0.00200587	0.0319162	-1.55178
TTLL4	-0.342875	4.13816	-3.21168	0.00200686	0.0319162	-1.5436
SNHG7	0.418828	3.60763	3.21114	0.00201014	0.0319446	-1.49865
WIPI1	-0.355505	4.32306	-3.21045	0.00201435	0.0319707	-1.55707
ZNF566	0.306065	2.25703	3.21038	0.00201476	0.0319707	-1.41698
RAB7A	-0.354301	7.45041	-3.20903	0.00202298	0.0320608	-1.5376
AFF3	0.67859	3.06219	3.20863	0.00202543	0.0320608	-1.44734
MNAT1	0.512094	0.906832	3.20842	0.00202671	0.0320608	-1.40985
ATG4C	0.406615	2.40317	3.20821	0.00202801	0.0320608	-1.42676
RALB	-0.471171	6.61169	-3.20804	0.00202904	0.0320608	-1.56105
NIBAN3	0.681855	5.38299	3.20783	0.00203031	0.0320608	-1.5718
BCKDK	-0.39823	4.78412	-3.20774	0.00203091	0.0320608	-1.57667
MYO9B	-0.339052	7.83898	-3.20669	0.00203731	0.0320936	-1.53353
TRIM65	0.213021	4.09105	3.2066	0.00203786	0.0320936	-1.54909
SNX27	-0.338228	6.13318	-3.20646	0.00203872	0.0320936	-1.57521
ZBTB9	0.29614	2.46003	3.20642	0.00203897	0.0320936	-1.44313
PROB1	0.593582	0.182871	3.20602	0.00204143	0.0321087	-1.4756
MRPS10	0.248507	3.56045	3.20564	0.00204378	0.0321147	-1.51911
PICALM	-0.396708	7.68658	-3.20518	0.00204662	0.0321147	-1.54297
ELP6	0.308838	2.77568	3.20514	0.00204688	0.0321147	-1.46852
MIIP	-0.289417	4.77825	-3.20495	0.00204807	0.0321147	-1.58271
SELENOH	0.405941	4.1055	3.20475	0.0020493	0.0321147	-1.55263
MPHOSPH10	0.346023	3.62423	3.20438	0.00205159	0.0321271	-1.52614
AF127577.3	-0.682586	0.00691364	-3.20362	0.0020563	0.0321602	-1.4635
EEF1A1P9	0.586514	1.70948	3.20355	0.00205671	0.0321602	-1.41461
INSC	-1.13482	-1.32945	-3.20314	0.00205929	0.0321697	-1.68891
RUSC2	-0.427279	1.98105	-3.20297	0.00206031	0.0321697	-1.42569
AGO4	-0.395943	6.67495	-3.20272	0.0020619	0.0321711	-1.57582
MCCC2	0.254575	3.75643	3.20237	0.00206404	0.0321811	-1.54019
IL4R	-0.399714	7.15476	-3.20208	0.00206587	0.0321862	-1.56557
LINC02260	-0.761296	-1.06267	-3.2016	0.0020689	0.0322099	-1.68541
CHST2	-0.409377	4.45571	-3.20003	0.00207866	0.0323385	-1.58742
AC138035.1	-1.16477	-0.332399	-3.19961	0.00208132	0.0323562	-1.53207
SNHG1	0.366576	4.19044	3.19905	0.00208482	0.0323873	-1.57038
AC119044.1	0.430657	0.470083	3.19828	0.00208967	0.032439	-1.44599
SERPINI1	0.847403	-0.210916	3.19534	0.00210829	0.0327044	-1.56835
CITED4	-0.551913	1.61708	-3.19491	0.00211099	0.0327196	-1.4405
NPLOC4	-0.17169	6.19056	-3.19471	0.00211232	0.0327196	-1.60614
ERLEC1	0.407923	3.58863	3.19396	0.00211704	0.0327691	-1.54961
GTF3A	0.344521	5.4154	3.19359	0.00211943	0.0327824	-1.61616
POR	-0.386177	5.38763	-3.19305	0.0021229	0.0327996	-1.61997
EPS8L2	0.39239	1.43875	3.19294	0.0021236	0.0327996	-1.43724
JAML	-0.423518	9.2087	-3.19225	0.00212798	0.0328436	-1.53466
SIRT2	-0.218045	5.0829	-3.19162	0.00213204	0.0328825	-1.62286
ASF1A	0.471608	3.34592	3.19115	0.00213504	0.0329051	-1.53356
EPHB4	-0.645607	4.28677	-3.18987	0.00214332	0.0329219	-1.612
ABHD15	0.26647	3.75843	3.18981	0.00214367	0.0329219	-1.5715
AC068580.1	-1.11443	-2.40876	-3.18963	0.00214484	0.0329219	-2.23631
OTX1	-0.743973	0.927186	-3.1896	0.00214503	0.0329219	-1.44593
TMEM140	-0.546888	6.40993	-3.18956	0.0021453	0.0329219	-1.61378
OCIAD2	0.466282	2.75153	3.18955	0.00214535	0.0329219	-1.50614
TRIB2	0.454828	5.06888	3.18906	0.00214852	0.032947	-1.62457
AC092368.3	-0.437322	2.45479	-3.18837	0.00215298	0.0329918	-1.50573
COX7C	1.04752	3.32776	3.18781	0.00215662	0.0330241	-1.53687
PLCB2	-0.294416	7.97	-3.18725	0.00216024	0.0330559	-1.58152
UBE2R2	-0.410218	6.78399	-3.18666	0.00216411	0.0330682	-1.6148
CD19	0.833762	3.51402	3.18665	0.00216414	0.0330682	-1.53139
PTPDC1	0.56847	0.50034	3.18504	0.00217468	0.0331758	-1.49249
WDR3	0.264419	3.48043	3.18489	0.00217563	0.0331758	-1.56759
ZBTB14	0.412289	3.49028	3.18463	0.00217737	0.0331758	-1.5659
AC066613.1	-0.601051	0.37411	-3.18463	0.00217737	0.0331758	-1.49036
EEF1AKNMT	0.20299	4.11286	3.18315	0.00218708	0.0333002	-1.6141
ZMYND11	0.487118	4.07729	3.1827	0.00219	0.033321	-1.60225
FES	-0.368704	6.3509	-3.18217	0.00219355	0.0333513	-1.63612
CFP	-0.493082	7.45906	-3.18134	0.00219902	0.0334076	-1.61128
IARS	0.292331	4.58316	3.18113	0.00220037	0.0334076	-1.63689
PRR33	-0.346548	5.88839	-3.18041	0.00220517	0.0334569	-1.64912
ACSS1	0.244659	5.31902	3.17997	0.00220806	0.0334654	-1.65329
ARMCX5	0.423316	1.9664	3.17963	0.0022103	0.0334654	-1.48239
NFATC2	0.412267	4.73755	3.17948	0.00221133	0.0334654	-1.64223
NFX1	0.211107	4.78769	3.17938	0.00221198	0.0334654	-1.64762
ABCC6	-0.470276	2.4231	-3.17879	0.00221593	0.0334802	-1.52416
DENND5A	-0.443296	7.03883	-3.17876	0.00221609	0.0334802	-1.63003
NRBF2	-0.504472	5.8577	-3.17784	0.00222225	0.0335497	-1.65728
FDX1	0.389328	2.53735	3.17693	0.00222833	0.0336179	-1.52127
WDR5	0.240689	4.17919	3.17601	0.00223451	0.0336873	-1.63645
KIAA0319	-0.712666	1.64779	-3.17495	0.00224163	0.0337709	-1.49368
AL731567.1	-0.78547	-0.0133544	-3.17465	0.00224361	0.0337771	-1.55166
TPD52	0.555365	3.43744	3.17323	0.00225317	0.0338972	-1.5811
SLC24A3	-0.709241	0.379096	-3.17298	0.0022549	0.0338993	-1.50708
ZC3H12D	0.340329	4.21481	3.17238	0.00225894	0.0339363	-1.64311
RSPH9	-0.746782	-0.408206	-3.17195	0.00226184	0.0339561	-1.59149
HSCB	0.394274	1.22257	3.17025	0.00227344	0.0341034	-1.49368
NMT2	0.294063	3.7622	3.16976	0.00227676	0.0341034	-1.62689
ADAMTSL4-AS1	-0.604833	2.67887	-3.16971	0.00227711	0.0341034	-1.56652
ZNF746	-0.440167	5.90629	-3.16958	0.00227802	0.0341034	-1.67882
EXOSC8	0.392717	3.16039	3.16934	0.00227962	0.0341037	-1.58653
ARMC1	0.44922	3.13386	3.16805	0.00228848	0.0341941	-1.58056
LYAR	0.340455	3.78508	3.16799	0.00228886	0.0341941	-1.63612
TNRC18	-0.390868	6.73126	-3.16695	0.00229601	0.0342771	-1.66981
NEU1	-0.2697	4.56023	-3.16642	0.00229967	0.0343077	-1.68192
TMEM88	-0.750439	1.13044	-3.16544	0.00230646	0.0343852	-1.50615
AC116533.1	2.4225	0.675387	3.1647	0.00231155	0.0344055	-1.56208
GFM1	0.293999	3.68444	3.16463	0.00231204	0.0344055	-1.6338
LARP4	0.472816	2.88833	3.16454	0.00231264	0.0344055	-1.5679
WDR43	0.411114	3.52161	3.16375	0.00231817	0.0344638	-1.62207
RPP40	0.590224	-0.602582	3.1634	0.00232055	0.0344698	-1.68631
TLR2	-0.610473	7.07582	-3.163	0.00232338	0.0344698	-1.67056
DAAM1	0.387801	2.46724	3.163	0.00232339	0.0344698	-1.55003
S1PR1	0.406894	5.99674	3.16261	0.00232607	0.0344857	-1.69682
AC145098.1	-0.588454	1.29062	-3.16186	0.00233133	0.0345398	-1.51593
GTF2F2	0.410631	2.23232	3.16135	0.0023349	0.0345687	-1.54493
CDCA7	0.715197	0.434608	3.16101	0.00233723	0.0345794	-1.54413
SERTAD3	-0.298077	3.76133	-3.15988	0.00234516	0.0346728	-1.66343
AC132872.1	-0.357029	2.08281	-3.1582	0.00235698	0.0348235	-1.5585
AC096537.1	-0.451523	0.899786	-3.15736	0.00236288	0.0348867	-1.52793
C1QTNF12	-0.732562	-1.56666	-3.15699	0.00236552	0.0349015	-1.8849
STAP1	0.877666	1.82956	3.15635	0.00237004	0.0349442	-1.53007
NLGN3	-0.427032	2.1564	-3.15576	0.00237425	0.0349608	-1.56637
HSF5	0.769123	-0.735895	3.15563	0.00237516	0.0349608	-1.78063
MSRB1	-0.547379	7.6331	-3.1555	0.00237606	0.0349608	-1.6739
PTPRCAP	0.373777	6.87358	3.15493	0.00238012	0.034984	-1.69838
AL731571.1	-0.590517	1.31888	-3.15482	0.0023809	0.034984	-1.53335
TTC39C	0.311696	4.34506	3.15418	0.00238548	0.0350273	-1.69993
EHBP1L1	-0.330016	8.11904	-3.15367	0.00238912	0.0350432	-1.66796
MMP25	-0.758656	8.99296	-3.15357	0.00238983	0.0350432	-1.6426
TLE3	-0.524038	7.36018	-3.15224	0.00239935	0.0351588	-1.69261
SLC25A37	-0.585698	10.0516	-3.15172	0.00240307	0.0351892	-1.62029
STX3	-0.478036	6.93562	-3.14986	0.00241646	0.0353477	-1.71011
CHCHD7	0.285128	3.57516	3.14976	0.00241719	0.0353477	-1.67093
MAP1LC3B	-0.321024	6.12102	-3.14885	0.00242379	0.0354099	-1.73102
MARK2	-0.360618	6.56613	-3.14872	0.00242474	0.0354099	-1.72122
DZIP3	0.46575	2.64576	3.14758	0.002433	0.0355044	-1.60527
PDZD3	-0.87973	-0.478928	-3.14703	0.00243699	0.0355044	-1.65936
CDC37L1	0.466	2.48609	3.14695	0.00243756	0.0355044	-1.5933
TOMM5	0.723166	1.62037	3.14651	0.00244078	0.0355044	-1.55611
MICAL1	-0.283723	6.88569	-3.14646	0.00244111	0.0355044	-1.71949
DUSP12	0.398233	2.28658	3.14646	0.00244115	0.0355044	-1.588
CTPS1	0.272837	3.00253	3.14573	0.00244647	0.0355268	-1.64028
CEP70	0.76819	-0.104309	3.14529	0.00244965	0.0355268	-1.67233
SMC5	0.387919	3.93792	3.14522	0.00245016	0.0355268	-1.69705
IP6K1	-0.375326	5.96716	-3.1452	0.0024503	0.0355268	-1.74282
CCDC17	-0.529335	1.82754	-3.14504	0.00245151	0.0355268	-1.57749
STARD7	0.269066	5.67272	3.14488	0.00245264	0.0355268	-1.7471
AC246785.3	1.31335	-1.43786	3.14327	0.00246451	0.0356688	-2.01348
CPQ	-0.404093	5.34983	-3.14293	0.00246699	0.0356688	-1.75493
SMPDL3A	-0.500135	1.63305	-3.14287	0.00246744	0.0356688	-1.57
AC099524.1	-0.671823	1.75488	-3.14221	0.00247231	0.0357152	-1.58079
LSM3	0.770741	1.37061	3.14184	0.00247502	0.0357251	-1.56447
PLPP5	0.474574	3.59641	3.14147	0.00247775	0.0357251	-1.67704
BBS1	0.513133	2.44763	3.14144	0.00247799	0.0357251	-1.60244
MAST3	-0.410923	7.01762	-3.1403	0.00248644	0.0358228	-1.73252
AEBP2	0.388117	3.3913	3.13975	0.00249046	0.0358566	-1.6747
CCDC91	0.370171	3.08073	3.13852	0.00249965	0.0359647	-1.65893
AL627309.7	-1.10551	2.38313	-3.13758	0.00250666	0.0360415	-1.62027
PHF10	0.364737	4.4074	3.13551	0.00252219	0.0362404	-1.75028
GON7	0.754735	0.842126	3.13482	0.00252734	0.0362761	-1.59441
CD53	-0.278521	8.57344	-3.13472	0.00252806	0.0362761	-1.70515
RTN2	-0.626671	2.58557	-3.13281	0.00254248	0.0364472	-1.66278
ETS1	0.407512	7.89844	3.13269	0.00254338	0.0364472	-1.73356
MAN2B2	-0.196903	5.84736	-3.13082	0.00255762	0.0366267	-1.78314
TRMT61B	0.426952	1.7459	3.13043	0.00256061	0.0366451	-1.59833
PSIP1	0.285291	5.7238	3.12981	0.00256531	0.036682	-1.78668
MALT1	0.318831	4.94115	3.12964	0.00256661	0.036682	-1.78184
ZNHIT3	0.365155	3.08868	3.1287	0.00257384	0.0367608	-1.69236
WDCP	0.317578	2.32179	3.12845	0.00257573	0.0367633	-1.63474
TMEM234	-0.326226	2.81285	-3.12804	0.00257884	0.0367721	-1.67944
USP32	-0.402935	6.21373	-3.12792	0.00257978	0.0367721	-1.78641
OSTC	0.473855	3.44451	3.12703	0.00258661	0.0368426	-1.71761
ZNF3	0.210848	3.84261	3.12683	0.00258816	0.0368426	-1.74926
VDR	-0.521634	4.02837	-3.12521	0.00260062	0.0369954	-1.77474
MGAM2	-0.960956	1.38976	-3.12466	0.00260492	0.0370321	-1.61133
SBDSP1	0.613291	1.16619	3.12373	0.00261209	0.0370953	-1.60985
SH3BGRL3	-0.45848	8.34732	-3.12336	0.00261496	0.0370953	-1.739
PLEKHM2	-0.224261	5.80483	-3.12306	0.00261735	0.0370953	-1.80433
RANBP1	0.275046	4.05421	3.12286	0.00261884	0.0370953	-1.77336
GZMK	0.832955	3.47404	3.12272	0.00262	0.0370953	-1.71475
PDE4D	0.466199	2.9086	3.12254	0.00262137	0.0370953	-1.68975
PTGIR	-0.399827	2.83403	-3.12252	0.00262152	0.0370953	-1.69607
CCNQ	0.32337	2.83921	3.1223	0.00262321	0.0370953	-1.68656
URGCP	0.224166	3.7774	3.12183	0.00262692	0.0371082	-1.7579
AAGAB	0.211321	4.00989	3.12172	0.00262775	0.0371082	-1.77261
ZNF592	-0.310594	5.9673	-3.12131	0.00263099	0.0371082	-1.80757
RPL13	0.391997	9.34318	3.1213	0.00263105	0.0371082	-1.7193
DDHD2	0.324383	3.95558	3.12075	0.00263533	0.0371415	-1.76639
LINC01093	-1.52399	-2.82309	-3.12055	0.00263688	0.0371415	-2.51244
RDH14	0.488246	1.6768	3.12016	0.00263998	0.0371609	-1.62196
MYBPC3	-0.580967	2.54677	-3.11991	0.00264189	0.0371632	-1.68511
ARF1	-0.307675	7.88075	-3.11932	0.00264654	0.0371852	-1.76465
COX16	0.771113	1.2126	3.11883	0.00265039	0.0371852	-1.62073
AMMECR1	0.295557	2.55838	3.11882	0.00265046	0.0371852	-1.67386
NEDD1	0.422489	2.94901	3.11871	0.00265134	0.0371852	-1.69656
LARP1B	0.406683	1.76316	3.11861	0.00265212	0.0371852	-1.63133
VAMP8	0.444341	4.98196	3.11804	0.00265665	0.0372243	-1.81575
BLM	0.393936	1.99954	3.1169	0.00266567	0.0372987	-1.64409
APTX	0.20957	3.20643	3.11672	0.00266707	0.0372987	-1.73293
CDIPT	-0.308807	5.94216	-3.11661	0.00266797	0.0372987	-1.81948
BTRC	0.261227	2.99565	3.11649	0.00266892	0.0372987	-1.71378
SUB1	0.752263	4.07027	3.11594	0.00267324	0.0373188	-1.77965
GALNT11	0.290649	3.4888	3.11586	0.00267384	0.0373188	-1.75067
PEG10	1.289	-0.832638	3.11402	0.00268855	0.0374751	-2.00384
CBLB	0.357254	4.40639	3.11386	0.00268982	0.0374751	-1.80649
AC104530.1	-0.373513	5.24321	-3.1138	0.00269028	0.0374751	-1.83257
MSMO1	0.334678	2.59086	3.11314	0.00269553	0.0375029	-1.69092
CAMK2G	-0.302631	6.60567	-3.11276	0.00269855	0.0375029	-1.81578
METAP1	0.24901	3.88905	3.11274	0.00269876	0.0375029	-1.7859
AC108463.3	-0.803299	-1.1008	-3.11267	0.00269927	0.0375029	-1.89318
PAX5	0.840217	4.05545	3.11193	0.00270518	0.0375607	-1.76214
SUPV3L1	0.245233	3.18825	3.11072	0.00271492	0.037589	-1.74565
SSRP1	0.287376	5.48446	3.11062	0.00271574	0.037589	-1.83873
EIF3I	0.271493	5.21073	3.11035	0.00271794	0.037589	-1.8392
UPF3A	0.31437	4.57804	3.11032	0.00271816	0.037589	-1.82713
RPL12	0.408776	7.67229	3.11019	0.00271919	0.037589	-1.79605
MNDA	-0.475203	9.94242	-3.10997	0.00272095	0.037589	-1.73167
TLR4	-0.515439	6.98066	-3.10996	0.00272104	0.037589	-1.81548
LASP1	-0.365211	8.43044	-3.10994	0.00272125	0.037589	-1.77398
BIN1	0.334827	6.04321	3.1097	0.00272315	0.037591	-1.83575
TUBA4A	-0.432639	6.69491	-3.10942	0.00272539	0.0375977	-1.82057
C1orf35	0.333336	3.31947	3.10827	0.00273476	0.0377027	-1.76055
SCP2	0.323598	4.7928	3.10794	0.00273742	0.0377083	-1.8386
PLXNB3	-1.39518	-2.28509	-3.10739	0.00274184	0.0377083	-2.18712
NKAPD1	0.365938	3.51198	3.10723	0.0027432	0.0377083	-1.7764
HPX	-0.984711	-2.26474	-3.10714	0.00274386	0.0377083	-2.32099
BEX4	0.376192	2.81321	3.10713	0.00274396	0.0377083	-1.72404
COA4	0.290126	2.97496	3.10659	0.0027484	0.0377452	-1.74098
LRRC40	0.580396	2.05437	3.1057	0.00275561	0.0377884	-1.6685
MIR122HG	-0.510779	0.775317	-3.10569	0.00275575	0.0377884	-1.65449
TMEM156	0.489731	2.50759	3.10555	0.00275684	0.0377884	-1.69877
PRKRIP1	0.201597	4.46264	3.10514	0.00276017	0.0378099	-1.83821
ZNF256	0.477642	0.963504	3.10453	0.00276517	0.0378542	-1.65933
MSL1	-0.428231	7.77879	-3.10359	0.00277293	0.0379232	-1.81088
NPM1P25	0.995958	-0.944755	3.10346	0.00277399	0.0379232	-2.00754
CEBPZ	0.56472	3.67859	3.10327	0.00277552	0.0379232	-1.79129
F2RL3	-0.467688	0.671832	-3.10296	0.00277808	0.0379273	-1.66304
FRAT1	-0.48289	6.43159	-3.1024	0.00278268	0.0379273	-1.84768
GLUD1	0.237437	5.84092	3.10227	0.00278371	0.0379273	-1.85922
CLTCL1	-0.467766	2.34902	-3.10195	0.00278642	0.0379273	-1.71821
FANCI	0.409341	2.20198	3.10179	0.00278769	0.0379273	-1.7001
ZC3H15	0.589462	3.7035	3.10178	0.00278782	0.0379273	-1.80212
THNSL1	0.481713	1.29303	3.10173	0.0027882	0.0379273	-1.66256
MAPKAPK3	-0.294388	6.42607	-3.10044	0.00279883	0.0380477	-1.85294
BLK	0.764359	4.46761	3.10006	0.00280203	0.0380672	-1.82864
EIF2D	0.23437	4.3558	3.09925	0.00280871	0.0381337	-1.84879
ESYT2	0.29723	5.76431	3.09791	0.00281986	0.0382609	-1.87139
HAX1	0.276841	4.39489	3.09714	0.00282629	0.0383141	-1.85795
PSENEN	-0.384942	4.81637	-3.09657	0.00283109	0.0383141	-1.87502
NDUFB2	0.502973	3.19645	3.09656	0.00283119	0.0383141	-1.78515
RAB30	0.561585	2.96509	3.09646	0.00283197	0.0383141	-1.73667
DOCK5	-0.478885	6.87013	-3.09634	0.00283296	0.0383141	-1.85477
FKBP1A	-0.342391	7.38231	-3.09616	0.00283451	0.0383141	-1.83935
CADM4	-0.530714	1.428	-3.09573	0.00283808	0.0383382	-1.68338
ILKAP	0.181918	3.93278	3.09464	0.00284729	0.0384384	-1.84127
GRN	-0.541629	8.27034	-3.09358	0.00285621	0.0385345	-1.82088
CLMN	-0.351123	4.65973	-3.09319	0.00285946	0.0385345	-1.87927
C2orf68	-0.191861	5.57189	-3.09315	0.0028598	0.0385345	-1.88603
CEBPB	-0.482288	7.49201	-3.09251	0.00286526	0.0385838	-1.84651
NFYC	-0.281593	5.57129	-3.09143	0.00287435	0.038654	-1.89066
CXorf56	0.304832	3.0479	3.09121	0.00287622	0.038654	-1.78749
ATXN7L3	-0.181162	6.17699	-3.09104	0.00287767	0.038654	-1.88312
PPM1K	0.311518	5.35633	3.09104	0.00287769	0.038654	-1.89013
CLU	-1.11445	5.37252	-3.09017	0.0028851	0.0386981	-1.8928
SPATA2L	-0.358074	3.17447	-3.09003	0.00288631	0.0386981	-1.80641
ATP5F1A	0.191699	7.16106	3.08994	0.0028871	0.0386981	-1.86258
PAIP1	0.453272	3.28999	3.08978	0.00288845	0.0386981	-1.7997
CREBL2	0.308395	4.61609	3.0896	0.00288999	0.0386981	-1.88085
MRPL3	0.649949	3.1146	3.08887	0.00289619	0.0387569	-1.78715
ATP5PF	0.537542	2.47081	3.08827	0.00290133	0.0388015	-1.75257
NAIF1	-0.230605	3.21528	-3.08787	0.00290477	0.0388155	-1.81563
NCF2	-0.472676	9.36727	-3.08772	0.002906	0.0388155	-1.80529
KAT2A	0.300362	4.36719	3.0862	0.00291908	0.0389599	-1.88288
ACRBP	-0.595307	3.47206	-3.08604	0.00292045	0.0389599	-1.84574
DPH2	0.235678	3.25729	3.08481	0.00293106	0.0390622	-1.81998
WDR61	0.333484	3.35189	3.08454	0.0029334	0.0390622	-1.8241
WDR36	0.439082	3.49603	3.08452	0.00293358	0.0390622	-1.82671
WIPI2	-0.242974	6.11067	-3.08425	0.0029359	0.0390688	-1.90206
SECTM1	-0.546417	7.14599	-3.08372	0.00294056	0.0390866	-1.87603
SNX20	-0.216742	6.1505	-3.08328	0.00294438	0.0390866	-1.90426
FFAR2	-0.593064	7.48225	-3.08302	0.00294657	0.0390866	-1.87167
COMMD6	1.28268	1.35496	3.08301	0.00294667	0.0390866	-1.70823
AC016737.1	-0.603234	-0.697881	-3.08294	0.00294727	0.0390866	-1.85078
SERPINA1	-0.605518	9.43947	-3.08214	0.0029543	0.0390866	-1.81761
MATR3	0.458607	6.36239	3.0821	0.00295457	0.0390866	-1.90471
CDC42SE1	-0.276976	8.94044	-3.08205	0.00295502	0.0390866	-1.83285
SUPT3H	0.53709	0.895131	3.08198	0.00295563	0.0390866	-1.7147
CKAP2	0.344772	2.87255	3.08197	0.00295569	0.0390866	-1.78828
ZNF766	0.223736	3.76486	3.08179	0.00295729	0.0390866	-1.86063
MCM7	0.218628	5.40212	3.08126	0.00296195	0.0391241	-1.91681
NARF	-0.32124	6.27316	-3.08043	0.00296921	0.0391908	-1.90838
QSOX1	-0.400534	5.59426	-3.08026	0.00297066	0.0391908	-1.92001
CD82	-0.394615	6.53598	-3.07978	0.0029749	0.0392226	-1.90511
C15orf39	-0.499037	7.08258	-3.07948	0.00297754	0.0392245	-1.89228
BRIX1	0.435923	2.27076	3.07934	0.00297871	0.0392245	-1.75839
PLA2G15	-0.290078	2.8319	-3.07875	0.00298391	0.0392689	-1.80879
ATF6	-0.296116	5.54911	-3.07851	0.00298606	0.0392731	-1.92526
KIAA0513	-0.382791	6.87254	-3.07763	0.00299374	0.0393472	-1.90181
POLR2M	0.474771	3.78108	3.07733	0.00299643	0.0393472	-1.86206
WDR26	-0.289237	6.7502	-3.07668	0.00300217	0.0393472	-1.90952
TADA3	-0.22147	5.98749	-3.07662	0.00300265	0.0393472	-1.92436
MICU1	-0.337094	5.01501	-3.07638	0.0030048	0.0393472	-1.92984
TLE1	0.506726	2.18875	3.07635	0.00300507	0.0393472	-1.75347
SREBF1	-0.374371	4.89149	-3.076	0.00300818	0.0393472	-1.9296
FAM3C	0.465697	3.16086	3.0759	0.00300906	0.0393472	-1.81628
LAPTM5	-0.312775	10.0004	-3.0758	0.00300994	0.0393472	-1.81902
MTRES1	0.414482	1.48255	3.07579	0.00301005	0.0393472	-1.73028
RPL32	0.473458	7.50197	3.07492	0.00301776	0.0393948	-1.8913
CFLAR-AS1	-0.570457	2.00598	-3.07449	0.0030216	0.0393948	-1.76023
USP3	-0.241636	6.15059	-3.07449	0.00302161	0.0393948	-1.92743
WAS	-0.479035	7.64438	-3.07433	0.00302304	0.0393948	-1.88827
AC008105.3	-0.25502	5.326	-3.07423	0.00302386	0.0393948	-1.93697
AC023050.5	-0.854158	-1.56384	-3.07414	0.00302472	0.0393948	-2.09454
GNS	-0.365874	6.5301	-3.07366	0.00302893	0.0394258	-1.92173
ZFP30	0.459038	1.83303	3.07338	0.00303142	0.0394342	-1.7446
MED25	-0.46754	6.4935	-3.0731	0.00303397	0.0394434	-1.92391
AIMP1	0.40272	3.8408	3.07254	0.00303898	0.0394768	-1.8858
CLDN9	-0.682338	2.45125	-3.0724	0.00304022	0.0394768	-1.80718
FRA10AC1	0.362856	2.71731	3.07094	0.00305331	0.0396228	-1.81356
SHISA7	-1.78683	-2.43946	-3.07058	0.00305651	0.0396403	-2.47154
CNTD1	-0.471711	0.599889	-3.06868	0.00307362	0.0398381	-1.75104
IER2	-0.273722	7.10927	-3.06832	0.00307687	0.0398562	-1.91946
SLC15A3	-0.451172	5.83389	-3.06787	0.003081	0.0398855	-1.9497
GPN1	0.287268	3.6908	3.06694	0.00308939	0.0399701	-1.89594
HAAO	-0.500001	1.46241	-3.06653	0.00309317	0.0399741	-1.75853
BOD1	0.430257	2.40643	3.06646	0.00309378	0.0399741	-1.79485
ARL2BP	0.273432	4.33519	3.06629	0.0030953	0.0399741	-1.93251
RRAGD	-0.436413	3.6126	-3.06578	0.00309999	0.0399869	-1.8996
ASAP1	-0.407352	6.01312	-3.06553	0.00310219	0.0399869	-1.95347
NOL9	0.221701	4.24359	3.06546	0.00310284	0.0399869	-1.93161
TM2D2	0.226322	3.24983	3.06517	0.00310548	0.0399869	-1.86803
MPIG6B	-1.04628	3.30725	-3.06516	0.00310561	0.0399869	-1.89947
ARF6	0.196166	6.48692	3.06483	0.00310858	0.040001	-1.94713
NAP1L4	0.253699	5.95948	3.06394	0.00311673	0.0400735	-1.95793
TSEN15	0.319493	3.26488	3.06381	0.00311795	0.0400735	-1.8678
C11orf58	0.341063	5.58202	3.06355	0.00312029	0.0400795	-1.96248
EIF3L	0.250254	7.32884	3.06313	0.00312418	0.0400928	-1.92852
INSL3	-0.637159	0.210066	-3.063	0.00312533	0.0400928	-1.77133
EEF1A1P5	0.597873	3.28315	3.06283	0.00312693	0.0400928	-1.87396
TC2N	0.557619	4.96163	3.06186	0.00313585	0.0401832	-1.95883
NAF1	0.361107	1.52374	3.0615	0.0031392	0.040202	-1.76484
LZIC	0.17182	4.08805	3.06113	0.00314257	0.0402056	-1.93668
PMS2P1	0.363989	1.38347	3.06106	0.00314323	0.0402056	-1.76434
NEMF	0.26325	4.80341	3.06055	0.00314789	0.0402412	-1.96387
SLAMF6	0.312864	5.20119	3.05975	0.00315531	0.0402529	-1.97155
MARCKS	-0.576981	6.78592	-3.05975	0.00315533	0.0402529	-1.95223
GYG1	-0.354828	4.9085	-3.05974	0.00315541	0.0402529	-1.97259
TAF9B	0.45211	2.22531	3.05964	0.00315632	0.0402529	-1.79875
MIGA1	0.307349	2.82182	3.05932	0.00315932	0.0402581	-1.84434
GALK2	0.295523	2.32865	3.05907	0.00316166	0.0402581	-1.81466
METTL18	0.724129	0.775434	3.05899	0.00316236	0.0402581	-1.77064
TTLL3	-0.270405	5.88065	-3.0581	0.00317067	0.0402814	-1.97517
MRPL11	0.423999	2.72175	3.05808	0.00317078	0.0402814	-1.84594
KREMEN1	-0.925999	5.11024	-3.05778	0.00317365	0.0402814	-1.97916
ACAT1	0.418337	2.69858	3.05776	0.00317375	0.0402814	-1.84409
REXO4	0.235247	3.91746	3.05772	0.00317413	0.0402814	-1.93567
TARSL2	0.354915	2.75699	3.05727	0.00317832	0.0402814	-1.84631
DDX54	0.262752	5.19433	3.05722	0.0031788	0.0402814	-1.97883
NUP42	0.331258	3.1921	3.0571	0.00317992	0.0402814	-1.87874
PARVG	-0.213821	7.30634	-3.05696	0.00318126	0.0402814	-1.94523
UTP6	0.22973	4.62514	3.05666	0.00318407	0.0402814	-1.96963
CYP20A1	0.236285	2.83072	3.0564	0.00318646	0.0402814	-1.85842
AP002907.1	-0.648921	0.489211	-3.05603	0.00318993	0.0402814	-1.78558
NAA35	0.314433	2.84851	3.05585	0.00319162	0.0402814	-1.85592
LINC00211	-0.756522	1.59114	-3.05562	0.00319378	0.0402814	-1.78416
ATMIN	0.256737	4.19992	3.05536	0.00319625	0.0402814	-1.95346
MAD2L1	0.531501	0.872154	3.05531	0.00319667	0.0402814	-1.777
AC026403.1	1.087	3.55907	3.05526	0.0031971	0.0402814	-1.89179
TMA7	0.731712	3.25958	3.05506	0.00319898	0.0402814	-1.89187
DNAJB9	0.415795	3.06201	3.0548	0.00320146	0.0402814	-1.87119
ILF3	0.277843	6.94859	3.05477	0.00320177	0.0402814	-1.96226
AL445524.1	-0.513554	1.68085	-3.05432	0.00320594	0.0402973	-1.79619
FAM30A	0.775759	3.39586	3.05423	0.00320679	0.0402973	-1.87896
SIRPB1	-0.5646	6.90652	-3.05357	0.00321304	0.0403522	-1.96634
TYROBP	-0.455632	8.21308	-3.05269	0.00322131	0.0404324	-1.9276
LINGO3	-0.385847	4.77386	-3.05238	0.00322426	0.0404457	-1.99026
SACS	0.606203	2.38005	3.05198	0.00322802	0.0404692	-1.82022
EFNA4	-0.295299	1.83797	-3.05169	0.0032308	0.0404804	-1.81024
PPAN	0.260087	4.1683	3.05136	0.00323394	0.040496	-1.96603
ARSA	-0.354741	5.7331	-3.05053	0.00324179	0.0405702	-1.99684
COX7A2L	0.360064	4.51808	3.05033	0.00324365	0.0405702	-1.98234
AL162632.1	-0.568848	1.29154	-3.05007	0.00324618	0.0405782	-1.79134
MTX2	0.521342	1.23582	3.04922	0.00325426	0.0406494	-1.78961
AL353625.1	-0.556069	2.51443	-3.0487	0.00325923	0.0406494	-1.86016
PHOSPHO1	-0.676863	7.82678	-3.04858	0.00326035	0.0406494	-1.9515
HACL1	0.300522	2.86625	3.04845	0.00326158	0.0406494	-1.88127
C1QBP	0.276449	4.49771	3.04828	0.00326319	0.0406494	-1.98785
ICOSLG	0.481549	3.49402	3.04827	0.00326325	0.0406494	-1.91368
MTHFD1	0.268946	3.97084	3.04767	0.00326906	0.040698	-1.96388
AC096970.1	-1.0236	-1.75911	-3.04746	0.00327102	0.0406988	-2.19094
TBC1D2	-0.362875	4.38397	-3.04624	0.00328277	0.0408025	-1.99489
JADE3	0.686852	0.0302392	3.0461	0.00328405	0.0408025	-1.86105
KLHL20	0.379302	2.75748	3.04589	0.00328608	0.0408025	-1.875
AC007620.2	-0.545248	2.24607	-3.0458	0.00328696	0.0408025	-1.85242
TBC1D27P	0.892761	0.987775	3.0454	0.00329077	0.0408262	-1.80496
ATG7	-0.29177	4.83888	-3.04514	0.00329333	0.0408342	-2.00953
GUF1	0.28383	2.94496	3.04485	0.00329613	0.0408453	-1.89559
NDUFA4	0.896892	2.88928	3.04406	0.00330371	0.0408888	-1.88174
ENTR1	0.258326	3.83975	3.04399	0.00330444	0.0408888	-1.96491
ZNF687	-0.29151	5.34401	-3.04389	0.00330536	0.0408888	-2.01657
LINC02656	-0.649251	0.473441	-3.04347	0.00330947	0.040916	-1.81103
MAK16	0.379851	2.80311	3.04283	0.0033156	0.0409682	-1.88634
SIPA1L1	-0.432839	5.90075	-3.04241	0.00331973	0.0409703	-2.01621
MSRA	-0.428891	3.20495	-3.04228	0.00332098	0.0409703	-1.93636
IFI16	-0.331386	7.37215	-3.04203	0.00332336	0.0409703	-1.9818
ABCE1	0.488837	3.90771	3.04203	0.00332342	0.0409703	-1.96424
ZNF146	0.397657	4.18946	3.0415	0.00332857	0.0410051	-1.98435
MPZL3	-0.470933	5.89386	-3.04135	0.00333006	0.0410051	-2.01899
PITPNM1	-0.203238	6.34182	-3.04074	0.00333592	0.0410267	-2.01226
SMC4	0.362502	4.19641	3.04054	0.00333788	0.0410267	-1.98983
ZMYND19	0.327848	2.5818	3.04054	0.00333791	0.0410267	-1.87498
AC093392.2	-1.04762	-0.698043	-3.04038	0.00333947	0.0410267	-1.95928
AC007603.1	-0.933283	-2.11413	-3.04013	0.0033419	0.04103	-2.28732
NOP56	0.226066	5.5362	3.03996	0.00334357	0.04103	-2.02467
TFEB	-0.391918	5.96662	-3.03924	0.0033506	0.0410726	-2.02271
ELP3	0.257007	4.08176	3.03877	0.00335518	0.0410726	-1.99153
ZNF248	0.486444	2.05515	3.03867	0.00335621	0.0410726	-1.83964
BCL2	0.399346	4.93316	3.03864	0.00335653	0.0410726	-2.02104
AC005071.1	-0.6342	-0.0435028	-3.03845	0.00335839	0.0410726	-1.85687
LARGE2	0.691259	1.95231	3.03841	0.0033588	0.0410726	-1.8252
UFM1	0.447948	4.25808	3.03824	0.00336045	0.0410726	-1.99417
TSPAN16	-0.775066	0.540055	-3.03732	0.00336945	0.0411558	-1.8239
ACTN1	-0.579905	7.8881	-3.03704	0.00337219	0.0411558	-1.97946
SMC3	0.312094	4.7352	3.03696	0.00337302	0.0411558	-2.02237
DENR	0.307739	4.34998	3.03628	0.00337968	0.0412137	-2.0093
TDRKH	0.333461	2.05166	3.03586	0.00338382	0.0412406	-1.85362
GRK2	-0.23442	8.82217	-3.03536	0.0033888	0.0412624	-1.95704
AC079776.5	-1.01992	-2.44225	-3.03523	0.00339014	0.0412624	-2.47366
GP1BB	-1.28758	4.34825	-3.03495	0.00339287	0.0412624	-2.0285
CNOT3	-0.281603	5.27629	-3.03477	0.00339464	0.0412624	-2.04033
TERF1	0.240222	3.42396	3.03471	0.00339523	0.0412624	-1.95866
AC125257.1	0.808661	1.14172	3.03396	0.00340269	0.0413297	-1.82695
PTPRK	0.713488	0.677657	3.03367	0.0034056	0.0413416	-1.85581
SPIB	0.654413	4.17729	3.03344	0.00340785	0.0413455	-1.99075
SETDB2	0.344496	3.42849	3.0331	0.00341122	0.041363	-1.96174
SNRPF	0.393229	2.45222	3.03269	0.0034153	0.041389	-1.89361
FAM76A	0.237571	3.02731	3.0321	0.00342124	0.0414376	-1.93549
THEMIS2	-0.416273	7.95526	-3.03133	0.00342888	0.0415067	-1.99238
AP000640.1	-0.577483	-0.155561	-3.02998	0.00344239	0.0416468	-1.88426
FAM162A	0.356974	2.77122	3.02975	0.00344477	0.041652	-1.92527
PRPH2	-1.05837	-1.66554	-3.02881	0.00345424	0.0417316	-2.20599
SSBP1	0.295098	4.02564	3.02856	0.00345675	0.0417316	-2.02178
MCM3	0.306799	4.70828	3.02848	0.00345757	0.0417316	-2.04411
PRKD3	0.316893	4.16829	3.02822	0.00346012	0.0417316	-2.01767
TLR8	-0.453579	6.39397	-3.02798	0.00346253	0.0417316	-2.04528
CCN3	-0.657775	3.04279	-3.02783	0.00346406	0.0417316	-1.96827
SEC11C	0.52346	2.7028	3.02774	0.00346498	0.0417316	-1.91929
AL109809.1	-0.663805	0.0473035	-3.02709	0.00347156	0.0417874	-1.88434
ICAM1	-0.448579	4.6916	-3.02685	0.003474	0.0417932	-2.05418
HLA-DMB	0.388661	6.38603	3.02664	0.00347612	0.0417953	-2.04939
IL6R	-0.430361	8.31808	-3.02469	0.00349593	0.0419743	-1.99912
TIMM21	0.272221	2.19311	3.02459	0.00349695	0.0419743	-1.89192
PLOD1	-0.429007	4.97988	-3.0244	0.00349883	0.0419743	-2.06539
NARF-IT1	-0.601883	-0.502843	-3.0244	0.00349884	0.0419743	-1.94389
EPOR	-0.419454	3.11176	-3.0225	0.00351829	0.0421679	-1.97758
POLR1C	0.264724	3.20005	3.02238	0.00351955	0.0421679	-1.97574
AP001885.1	-0.924052	-1.37832	-3.02225	0.00352088	0.0421679	-2.148
NCK1	0.299049	3.76275	3.02122	0.00353142	0.0422706	-2.01495
LCP1	-0.361757	10.5299	-3.02029	0.00354096	0.0422755	-1.94695
SH3GLB1	-0.359216	6.35637	-3.02007	0.00354329	0.0422755	-2.06553
GOLGA5P1	-0.732315	-0.72379	-3.01979	0.0035462	0.0422755	-1.97676
ATG4D	-0.19111	3.95487	-3.01955	0.00354865	0.0422755	-2.04305
PSMG2	0.207708	4.05462	3.01946	0.00354962	0.0422755	-2.04231
POU2AF1	0.565557	4.32356	3.01939	0.00355034	0.0422755	-2.04283
SNX11	-0.336731	5.38153	-3.01928	0.00355145	0.0422755	-2.08062
SNAI3	-0.327552	3.7824	-3.01922	0.00355202	0.0422755	-2.03725
ALDH6A1	0.276527	2.63112	3.01896	0.00355476	0.0422755	-1.93267
RPS16	0.394143	7.91216	3.01895	0.0035548	0.0422755	-2.02475
LEP	-0.917	-1.13748	-3.01895	0.00355482	0.0422755	-2.07778
VIM	-0.340865	9.69107	-3.01889	0.00355549	0.0422755	-1.97347
KDM2B	0.288976	4.76997	3.01835	0.00356102	0.0423177	-2.07111
RPUSD4	0.2607	3.52892	3.01691	0.00357604	0.0424591	-2.0128
C1orf216	0.325816	2.64378	3.01683	0.00357688	0.0424591	-1.94457
AC131009.4	-0.610179	0.530899	-3.01648	0.00358052	0.0424788	-1.87188
MPST	-0.289884	4.09432	-3.01521	0.00359367	0.0426113	-2.06406
AC074117.1	-0.227917	3.9189	-3.0141	0.00360533	0.0426943	-2.05244
RNASEH1	0.209873	3.86981	3.01409	0.00360542	0.0426943	-2.04397
COPS4	0.474053	3.07214	3.01397	0.00360665	0.0426943	-1.98174
ANXA11	-0.397391	7.94394	-3.01301	0.00361676	0.0427904	-2.03878
COX6C	0.84113	1.51351	3.01279	0.00361907	0.0427941	-1.88628
ZBTB47	-0.460155	3.02559	-3.01253	0.00362181	0.0428028	-1.99304
TSHZ3	-0.471081	3.02154	-3.01149	0.00363278	0.0429088	-1.9997
NCF4-AS1	-0.887527	-0.745532	-3.01087	0.00363935	0.0429628	-2.01905
CDPF1	0.324033	1.61316	3.0106	0.00364224	0.0429661	-1.89403
IL7R	0.460344	7.97258	3.01045	0.00364374	0.0429661	-2.04948
AC000095.3	-0.754702	0.276331	-3.01016	0.00364682	0.0429661	-1.88969
FRG1CP	0.440841	2.20593	3.01008	0.00364765	0.0429661	-1.9279
RCAN3	0.407031	5.51695	3.00942	0.0036547	0.0430255	-2.10321
SINHCAF	0.460587	4.20369	3.00904	0.00365877	0.0430498	-2.06632
BRD9	0.188002	4.73446	3.00858	0.00366363	0.0430704	-2.09854
AL513314.2	-0.842052	1.50698	-3.00849	0.00366454	0.0430704	-1.89741
PPP1R8	0.197706	4.25471	3.00815	0.0036682	0.0430898	-2.08176
RPL37A	0.340928	7.93424	3.00792	0.00367068	0.0430953	-2.05362
CD72	0.73116	3.32926	3.00757	0.00367439	0.0431153	-1.98963
FANCG	0.292935	2.36189	3.00698	0.0036807	0.0431656	-1.94607
MSH6	0.197327	4.31076	3.00637	0.00368722	0.0432185	-2.08835
FBXL5	-0.372256	7.39898	-3.00592	0.00369201	0.043251	-2.07493
UQCC2	0.356094	3.06345	3.00494	0.00370249	0.0433451	-2.00711
EIF2S2	0.239499	4.975	3.00478	0.00370431	0.0433451	-2.11372
ZCRB1	0.379359	2.77288	3.00443	0.00370799	0.0433451	-1.98897
MBIP	0.398364	1.71359	3.00442	0.00370813	0.0433451	-1.91053
TAPBP	-0.312567	7.9442	-3.004	0.0037127	0.0433738	-2.06307
ITGA2B	-1.31926	4.23746	-3.00382	0.00371463	0.0433738	-2.10792
CD3G	0.386057	5.46716	3.00353	0.0037177	0.043386	-2.1186
CMTM5	-0.982061	1.72168	-3.00287	0.00372481	0.0434453	-1.94196
TBCE	0.293818	2.39727	3.00261	0.0037277	0.0434554	-1.96345
AC018638.5	-0.451794	3.97277	-3.00217	0.00373241	0.0434657	-2.09221
PNO1	0.227321	2.41543	3.00213	0.00373287	0.0434657	-1.96676
GNAI2	-0.35307	9.30005	-3.00196	0.00373467	0.0434657	-2.0278
DNM1L	0.306887	4.18639	3.00156	0.00373901	0.0434926	-2.09217
HYAL1	-0.444496	0.936869	-3.00092	0.00374595	0.0435444	-1.9045
KRI1	0.239446	5.19533	3.00078	0.00374753	0.0435444	-2.12585
AC245060.5	1.20388	1.20946	2.99989	0.00375712	0.0436152	-1.90727
TMED10	0.198303	6.04346	2.99984	0.00375769	0.0436152	-2.12421
GLUL	-0.468862	8.69537	-2.99847	0.0037727	0.043762	-2.05444
DYNAP	-0.739614	-1.14756	-2.99831	0.00377442	0.043762	-2.15918
C22orf46	0.27648	3.08679	2.99782	0.00377978	0.0438005	-2.02706
C18orf15	-0.650754	0.0123175	-2.9973	0.00378549	0.0438429	-1.94013
FCF1	0.230514	4.29484	2.99648	0.00379452	0.0439238	-2.11284
HACD3	0.292295	3.21177	2.99567	0.00380342	0.0439756	-2.0415
RAB5B	-0.261068	6.80344	-2.99564	0.00380373	0.0439756	-2.11743
HHAT	0.504257	0.481868	2.99543	0.00380603	0.0439756	-1.9385
IKZF3	0.34308	6.34943	2.99527	0.00380783	0.0439756	-2.13234
EIF2A	0.461712	4.59754	2.99514	0.00380925	0.0439756	-2.12472
AC005726.1	-0.260302	3.28002	-2.99407	0.00382104	0.0440733	-2.06138
PDLIM2	-0.242987	6.19169	-2.99388	0.00382317	0.0440733	-2.13573
LINC00547	-0.69396	0.0561452	-2.99381	0.00382388	0.0440733	-1.95983
RPL4P1	1.04563	-1.76369	2.99298	0.00383317	0.0441566	-2.36628
MOB3A	-0.442371	8.06501	-2.99267	0.00383659	0.0441723	-2.08811
CYB5B	0.196639	4.53454	2.99171	0.00384728	0.0442564	-2.13565
GUCY2C	-0.839948	-1.93491	-2.99164	0.00384802	0.0442564	-2.3209
ITGB1BP1	0.231592	4.22379	2.99075	0.00385794	0.0443405	-2.12493
METRNL	-0.346864	4.88374	-2.99061	0.00385947	0.0443405	-2.15238
CYB5R1	-0.267229	4.46001	-2.99011	0.00386505	0.0443807	-2.14554
CRTC2	-0.247668	5.71012	-2.98954	0.00387143	0.0444177	-2.15523
ZWILCH	0.553997	1.31483	2.98932	0.00387395	0.0444177	-1.93368
CAMLG	0.248775	3.62141	2.98927	0.00387448	0.0444177	-2.09172
AC008124.1	0.40341	3.29497	2.98862	0.00388172	0.0444625	-2.06047
ATPAF1	0.235189	3.50366	2.98855	0.00388254	0.0444625	-2.08506
TSPYL2	0.301382	4.30386	2.98809	0.00388778	0.0444772	-2.13383
HADH	0.26699	3.32877	2.98806	0.00388805	0.0444772	-2.07018
RPS2	0.288534	9.594	2.98785	0.00389044	0.0444772	-2.05708
ITM2A	0.581287	4.17227	2.9877	0.00389212	0.0444772	-2.11912
TFAM	0.404334	4.03759	2.98736	0.00389599	0.0444863	-2.11507
STK35	-0.252048	4.91784	-2.98726	0.00389706	0.0444863	-2.16026
BACE2	0.574149	2.18261	2.98696	0.00390041	0.0444878	-1.9715
MIR155HG	1.20722	-1.10492	2.98688	0.00390135	0.0444878	-2.25176
GP6	-0.906837	0.717166	-2.98665	0.00390398	0.0444942	-1.93812
EIF3M	0.273388	5.40679	2.98635	0.00390733	0.0445087	-2.16363
SMARCD3	-0.35754	4.49153	-2.9856	0.00391577	0.044579	-2.15781
AL355490.1	-0.815652	-0.00991253	-2.9853	0.00391921	0.044579	-1.98116
ZBTB39	0.386897	2.42105	2.98525	0.00391974	0.044579	-1.99959
ZBED1	-0.318435	4.30452	-2.98503	0.00392227	0.0445841	-2.15015
EHD1	-0.337542	7.70953	-2.98477	0.00392521	0.0445939	-2.12017
MBOAT1	-0.311324	4.70599	-2.98371	0.00393727	0.0447072	-2.16595
ZNHIT6	0.318455	3.12089	2.98342	0.00394053	0.0447205	-2.06407
LRRC75A	-0.483844	2.55808	-2.98305	0.00394473	0.0447224	-2.03605
NLRP9P1	-0.808675	-0.62495	-2.98298	0.00394557	0.0447224	-2.01599
HNRNPA3P2	-0.810903	-1.46338	-2.98285	0.0039471	0.0447224	-2.19131
ZNF232	0.423843	1.44694	2.98259	0.00395003	0.0447224	-1.95558
RPL7A	0.288382	9.00506	2.98249	0.00395113	0.0447224	-2.087
MCM2	0.514882	2.48142	2.98107	0.00396737	0.0448664	-2.01232
MDH1	0.399362	4.24948	2.98087	0.00396963	0.0448664	-2.14949
ZXDB	0.428608	2.48623	2.98083	0.00397012	0.0448664	-2.01127
SQOR	-0.368712	6.13235	-2.98006	0.00397895	0.044896	-2.17136
TPST2	-0.272327	5.63282	-2.97988	0.00398109	0.044896	-2.18069
PSEN1	-0.325169	6.29923	-2.97987	0.00398115	0.044896	-2.17007
TGFA	-0.543778	3.80331	-2.97983	0.00398159	0.044896	-2.13421
MRVI1	-0.654117	5.35455	-2.97969	0.00398322	0.044896	-2.18289
AC093495.1	-0.450562	3.21076	-2.97857	0.00399609	0.0450175	-2.0968
MPRIP	0.296733	6.24531	2.97812	0.00400126	0.045052	-2.17731
AC243919.1	1.55698	5.17035	2.97762	0.00400704	0.0450807	-2.16599
CTDSP2	-0.295318	7.82944	-2.97754	0.00400801	0.0450807	-2.13613
PSMA6	0.649297	4.09546	2.97735	0.00401018	0.0450814	-2.14583
PCM1	0.257872	5.46096	2.97712	0.00401293	0.0450886	-2.18743
CD69	0.98832	1.41985	2.97676	0.00401703	0.0451111	-1.962
KPNA2	0.271637	3.22989	2.97655	0.00401953	0.0451155	-2.09244
PAK1	-0.427256	6.9919	-2.97598	0.00402613	0.045166	-2.16194
RARS2	0.358592	2.79972	2.97473	0.00404059	0.0453044	-2.06237
EDRF1-DT	1.38007	-2.73905	2.97452	0.00404308	0.0453087	-2.8262
ZNF277	0.353442	2.67955	2.97404	0.00404864	0.0453473	-2.05482
IPO7	0.36248	4.71585	2.97381	0.00405141	0.0453546	-2.18219
YWHAQ	0.246103	5.99778	2.97354	0.00405449	0.0453654	-2.19273
UTP3	0.246716	4.04784	2.97303	0.00406043	0.0454044	-2.15983
BLOC1S5	0.34767	2.79633	2.97288	0.00406221	0.0454044	-2.0594
MIS18A	0.438755	1.33804	2.97179	0.00407503	0.045524	-1.97764
FAU	0.44119	6.74371	2.97148	0.00407868	0.045541	-2.18085
CD28	0.515019	4.87182	2.97023	0.00409332	0.0456807	-2.19622
TBC1D3B	-0.531432	1.08137	-2.96954	0.00410158	0.0456945	-1.98216
DCAF11	-0.235672	6.15493	-2.96949	0.00410213	0.0456945	-2.19937
RGL3	-0.860847	-0.0169438	-2.9694	0.00410318	0.0456945	-2.01418
TRA2B	0.310937	5.39423	2.96931	0.00410425	0.0456945	-2.20697
COMMD3	0.540234	2.99286	2.96923	0.00410522	0.0456945	-2.08321
IRF8	0.360258	5.65791	2.96798	0.00412004	0.0458357	-2.21011
EBP	0.307912	3.15252	2.96701	0.00413154	0.04591	-2.11496
PDXDC1	0.259561	4.97779	2.96673	0.00413488	0.04591	-2.20942
TP53I13	0.316084	4.46936	2.96661	0.00413626	0.04591	-2.19453
LAMP2	-0.377737	7.13136	-2.96653	0.00413723	0.04591	-2.18415
GPR89B	0.404822	2.49272	2.96642	0.00413852	0.04591	-2.05708
NIT2	0.306418	2.90732	2.96633	0.00413957	0.04591	-2.09321
ERF	-0.368373	5.0249	-2.96512	0.004154	0.0460462	-2.21906
AP001266.2	-1.03074	-1.64684	-2.96494	0.00415614	0.0460462	-2.28162
ANKRD36C	0.493164	2.0584	2.96451	0.0041613	0.0460795	-2.03286
RN7SL126P	-1.11394	-2.47759	-2.96371	0.00417096	0.0461626	-2.54517
RFTN1	0.265186	4.67491	2.9634	0.00417464	0.0461795	-2.21051
NNT	0.256709	4.32782	2.96282	0.00418163	0.046233	-2.19809
AZIN1-AS1	-0.430873	2.34778	-2.96214	0.00418982	0.0462997	-2.06993
EMC1	0.185126	3.89792	2.9618	0.00419397	0.0463216	-2.18114
AL162586.2	-0.448983	1.83406	-2.96126	0.00420039	0.0463335	-2.02983
NOL3	-0.451821	0.997274	-2.9612	0.00420113	0.0463335	-1.99991
SEPTIN7P2	0.298513	2.52874	2.96117	0.00420153	0.0463335	-2.07296
COX4I1	0.314843	6.68077	2.96048	0.00420988	0.0464017	-2.20912
BAHD1	0.235101	4.4062	2.95999	0.00421582	0.0464264	-2.20953
GNE	0.244631	3.13976	2.95994	0.00421645	0.0464264	-2.12363
TIMP1	-0.556306	5.49796	-2.95933	0.00422377	0.0464777	-2.23355
CDKN2A	0.852437	-0.571207	2.95919	0.00422545	0.0464777	-2.15985
CNTROB	0.221001	3.65966	2.95883	0.00422988	0.0465026	-2.17186
DMAC1	0.540435	2.55099	2.95859	0.00423284	0.0465035	-2.07347
AQP10	-1.22752	0.571168	-2.95847	0.0042343	0.0465035	-2.00401
EMG1	0.252999	3.78807	2.95782	0.00424218	0.0465266	-2.18554
NUP107	0.291688	3.66818	2.95772	0.00424342	0.0465266	-2.17059
DAP	-0.33508	5.70678	-2.95741	0.00424715	0.0465266	-2.2381
LTBR	-0.376131	5.4813	-2.95726	0.00424899	0.0465266	-2.23983
TRPC4AP	-0.231595	6.26535	-2.95715	0.0042504	0.0465266	-2.22912
DRG1	0.259279	3.47702	2.95712	0.00425068	0.0465266	-2.16521
ACOT9	-0.245654	4.81657	-2.95688	0.00425359	0.0465266	-2.23766
NUP160	0.307849	4.35128	2.95668	0.00425608	0.0465266	-2.21208
SNX4	0.646187	2.48137	2.9566	0.0042571	0.0465266	-2.06681
RGS1	1.27789	-1.80408	2.95635	0.00426012	0.0465266	-2.43581
LAT2	-0.408173	7.2102	-2.95634	0.00426027	0.0465266	-2.20699
PALB2	0.326402	2.04242	2.95615	0.00426251	0.0465273	-2.04853
FBXO32	0.348648	3.24043	2.95577	0.0042672	0.0465388	-2.14511
OTUD5	-0.246185	6.01566	-2.95571	0.0042679	0.0465388	-2.23719
NOTCH1	-0.416818	7.10397	-2.9553	0.00427295	0.0465701	-2.21332
LINC00963	-0.361878	5.41377	-2.95468	0.00428055	0.0466226	-2.24682
JMY	0.433376	2.97427	2.95456	0.00428211	0.0466226	-2.11585
MRPS23	0.29407	3.1589	2.95403	0.00428866	0.04667	-2.1446
DEK	0.446965	5.50039	2.95385	0.00429082	0.04667	-2.24568
TWISTNB	0.446529	2.6394	2.9533	0.0042976	0.046701	-2.09158
EIF2AK3	0.353273	3.22579	2.95316	0.00429935	0.046701	-2.13893
RTCB	0.235145	4.56234	2.95304	0.00430076	0.046701	-2.23619
FTL	-0.464144	10.7741	-2.95291	0.00430238	0.046701	-2.10853
DUSP18	-0.26304	3.63975	-2.95258	0.00430652	0.0467223	-2.18984
FAM13A-AS1	-0.359108	5.11051	-2.95206	0.0043129	0.0467406	-2.25302
SLC9A7	0.389464	3.27444	2.95181	0.00431603	0.0467406	-2.14243
PGAM1	-0.253722	7.15104	-2.95174	0.00431686	0.0467406	-2.21926
ABCC5	-0.391516	4.87105	-2.95174	0.00431693	0.0467406	-2.25034
AC010378.2	-0.562264	0.169531	-2.95152	0.00431964	0.0467463	-2.0424
AC004233.2	-0.720387	1.1007	-2.95034	0.00433419	0.0468546	-2.02573
LINC00513	-0.594639	-0.831333	-2.9503	0.00433481	0.0468546	-2.14361
N4BP1	-0.393777	6.30856	-2.95017	0.00433642	0.0468546	-2.24648
AC097376.3	-0.317167	3.1331	-2.9497	0.00434222	0.0468546	-2.16716
ALAS1	-0.275177	4.5416	-2.94966	0.0043427	0.0468546	-2.24758
SARNP	0.93289	1.42911	2.94966	0.00434276	0.0468546	-2.03217
AC018926.3	-0.911434	-1.4514	-2.94855	0.00435653	0.0469795	-2.27408
GPAM	0.514751	1.37332	2.94837	0.00435887	0.0469811	-2.03024
PPIL3	0.464333	2.40143	2.94762	0.00436818	0.0470578	-2.09656
MAPK1	-0.324387	7.14262	-2.94725	0.00437278	0.0470817	-2.23393
DAZAP2	-0.310057	8.60242	-2.94709	0.00437479	0.0470817	-2.1894
U73166.1	-0.494611	0.291802	-2.94673	0.00437936	0.047086	-2.03614
[truncated: 19,445 more rows]
