# Supplementary material for: Molecular Profiling of Axial Spondyloarthritis Patients Reveals an Association between Innate and Adaptive Cell Populations and Therapeutic Response to Tumor Necrosis Factor Inhibitors
Source: Biomolecules. 2024 Mar 21;14(3):382. doi: 10.3390/biom14030382 (PMC10967957; doi:10.3390/biom14030382)
Supplement: Supplementary file 1 [file biomolecules-14-00382-s001.zip › SuppTable3.xlsx]

## Sheet: Transcriptomics Non-Responders
logfc: Log2 of the Fold change
AveExpr: Log2 of the average normalized expression CPM among all samples
t: t-statistic of the differential expression test
P.value: p value of the differential expression test
adj.P.Val: p-value correctedfor multiple testing
B: B-statistic (log-odds that the gene is differentially expressed)
	logFC	AveExpr	t	P.Value	adj.P.Val	B
RPL7P18	-0.806803	-0.390491	-3.76013	0.000352539	0.999824	-3.64939
KLK1	1.02679	-1.15287	3.51012	0.000794448	0.999824	-3.94287
CASP4	-0.374533	6.87995	-3.43394	0.00101108	0.999824	-2.2809
RPSAP58	1.78658	-1.27827	3.42714	0.00103294	0.999824	-4.15093
AC010542.5	-0.582613	1.16891	-3.42708	0.00103314	0.999824	-3.27175
AC027319.1	-1.70388	-3.04648	-3.41873	0.00106058	0.999824	-4.37648
WDR90	0.314405	2.27765	3.41583	0.00107026	0.999824	-2.79544
NUS1P1	-2.53454	-3.98844	-3.34842	0.00132054	0.999824	-4.42647
CIR1	-0.38494	5.72017	-3.29485	0.00155777	0.999824	-2.37898
APOBEC3F	0.262131	3.65187	3.24948	0.00178944	0.999824	-2.55007
FAM41C	-0.728067	-0.437973	-3.23951	0.00184457	0.999824	-3.91657
AL359532.1	-0.644579	-0.556325	-3.19468	0.00211249	0.999824	-3.97264
AC104964.4	-0.625544	-0.367634	-3.18673	0.00216367	0.999824	-3.89591
MTX1P1	-1.05079	0.822645	-3.17841	0.00221846	0.999824	-3.66615
AL512408.1	-0.986481	-2.67363	-3.10047	0.00279858	0.999824	-4.35445
USB1	-0.349204	5.98385	-3.09676	0.00282945	0.999824	-2.67248
AC069234.2	-1.88907	-3.50385	-3.09251	0.00286523	0.999824	-4.40354
TRAIP	0.515348	-0.396687	3.08593	0.00292142	0.999824	-3.96133
AC002091.2	-0.637825	-0.814238	-3.06273	0.00312783	0.999824	-4.07996
IL1B	-0.505478	4.87486	-3.05946	0.00315797	0.999824	-2.69428
NFKB2	-0.329637	6.31822	-3.02242	0.00351914	0.999824	-2.7934
LINC01260	-1.80348	-1.52017	-3.01644	0.00358085	0.999824	-4.27254
SDCBP	-0.463203	8.60512	-2.983	0.00394533	0.999824	-3.02584
CATIP-AS1	-1.20098	-2.24752	-2.96112	0.00420212	0.999824	-4.37678
ALDH1A2	-0.89994	-0.689264	-2.95611	0.00426307	0.999824	-4.08508
GPR84	-0.827039	0.0339784	-2.94443	0.0044083	0.999824	-3.94132
DGCR11	-0.493304	-0.0479246	-2.9273	0.00462972	0.999824	-3.96491
GK-AS1	-0.665201	-0.0690863	-2.92183	0.00470253	0.999824	-3.9257
AC097376.2	-0.5717	-0.245901	-2.91681	0.00477027	0.999824	-4.01172
RAB5A	-0.262555	4.84198	-2.90888	0.00487909	0.999824	-2.89408
RPGR	-0.338314	3.59047	-2.90622	0.00491615	0.999824	-2.99648
UBE2D4	0.2638	2.5444	2.89858	0.00502398	0.999824	-3.24511
TLR9	-0.853374	2.3039	-2.89671	0.0050506	0.999824	-3.3122
PLAU	-0.689265	-0.4157	-2.89361	0.00509526	0.999824	-4.07133
AL137789.1	-0.898302	-1.05007	-2.88466	0.00522605	0.999824	-4.1851
AC092718.8	-0.645357	-0.172594	-2.88325	0.00524694	0.999824	-4.01294
BACH1-IT2	-0.910625	-2.24755	-2.88177	0.00526887	0.999824	-4.34988
BST1	-0.393045	5.72532	-2.88029	0.00529096	0.999824	-2.9453
AL133216.2	-0.42342	3.8838	-2.87106	0.00543061	0.999824	-3.01864
MAPK12	0.385631	0.843142	2.86786	0.00547981	0.999824	-3.7381
IL1RN	-0.465233	5.71972	-2.85867	0.00562343	0.999824	-2.972
LSMEM1	-0.547397	1.82607	-2.85412	0.0056959	0.999824	-3.51594
SIRPD	-0.497163	0.55709	-2.85075	0.00575006	0.999824	-3.84243
PTX3	-0.547991	-0.344705	-2.84186	0.00589524	0.999824	-4.03617
NT5DC4	-0.838643	-0.313173	-2.84028	0.00592146	0.999824	-4.1189
IVNS1ABP	-0.248929	6.76473	-2.83288	0.00604539	0.999824	-3.06496
AC018552.2	-0.87148	-1.20729	-2.82461	0.00618659	0.999824	-4.24189
DHRS13	-0.456311	4.31343	-2.81826	0.00629713	0.999824	-3.03448
AL359762.3	-0.500981	2.00461	-2.81435	0.00636618	0.999824	-3.4548
TMEM134	0.207211	3.52943	2.81371	0.00637752	0.999824	-3.12472
TMEM41A	0.211005	2.70185	2.80946	0.00645348	0.999824	-3.28662
AL109804.1	-1.4762	-3.11433	-2.7871	0.00686652	0.999824	-4.43787
AC010654.1	-0.613313	-1.80322	-2.77716	0.00705782	0.999824	-4.32093
EDDM13	0.870131	-2.37704	2.77208	0.00715758	0.999824	-4.38426
COBLL1	0.610392	1.89196	2.75952	0.00740952	0.999824	-3.45477
RABEP2	0.273986	4.43951	2.75748	0.00745123	0.999824	-3.0996
AC006517.2	-1.40985	-2.39822	-2.752	0.00756423	0.999824	-4.41108
HOXB7	1.06933	-2.52133	2.7456	0.00769808	0.999824	-4.40464
SLC17A9	0.343826	2.73198	2.73328	0.00796222	0.999824	-3.33825
AC009148.1	0.612812	-0.682506	2.71851	0.00828986	0.999824	-4.191
ANXA3	-0.67903	3.98372	-2.71781	0.00830565	0.999824	-3.18914
C9orf106	-0.501083	0.0964144	-2.7154	0.00836028	0.999824	-4.00552
AC002511.2	-0.927642	-1.54617	-2.71392	0.00839406	0.999824	-4.31957
AC105020.1	0.646211	-1.47294	2.71199	0.00843815	0.999824	-4.29015
RAB27A	-0.263453	6.43439	-2.71156	0.00844801	0.999824	-3.18855
PIDD1	0.234123	3.55603	2.70674	0.00855954	0.999824	-3.24703
AC008753.3	-1.12574	-2.32376	-2.70388	0.00862631	0.999824	-4.39731
SNW1	-0.162794	5.12251	-2.69413	0.00885733	0.999824	-3.16738
FCER1G	-0.453893	6.44775	-2.68945	0.00897045	0.999824	-3.21418
NFKBIA	-0.412442	6.21731	-2.67992	0.00920451	0.999824	-3.21836
UPF2	-0.149923	5.59667	-2.67683	0.00928155	0.999824	-3.19753
HIST1H1PS1	-0.851939	-1.92773	-2.65998	0.00971232	0.999824	-4.35833
SEPTIN14	-0.548303	2.46505	-2.65056	0.00996114	0.999824	-3.51153
AC011374.2	1.21045	-2.43586	2.64527	0.0101032	0.999824	-4.41902
CINP	-0.180135	3.84238	-2.64331	0.0101564	0.999824	-3.29361
AC083949.1	0.851657	-2.36622	2.64301	0.0101646	0.999824	-4.38709
ZNF319	-0.252687	4.26072	-2.62862	0.010563	0.999824	-3.26885
VIM-AS1	-0.272852	4.10649	-2.62759	0.0105919	0.999824	-3.28039
AC079781.5	0.490011	2.56544	2.61974	0.0108156	0.999824	-3.50192
RPL36AL	-0.500059	5.39276	-2.61692	0.0108972	0.999824	-3.26344
AC004263.2	-0.281321	4.0593	-2.61537	0.0109422	0.999824	-3.30185
NSUN5P2	0.289823	3.65248	2.61143	0.0110574	0.999824	-3.34205
EFHD1	-0.742987	-1.14514	-2.608	0.0111585	0.999824	-4.29665
AC073263.1	0.894996	-2.37802	2.60313	0.0113035	0.999824	-4.40091
CEP131	0.245948	2.90723	2.60063	0.0113786	0.999824	-3.46126
MRAS	-0.439185	0.974808	-2.59149	0.0116572	0.999824	-3.86252
SLC2A3	-0.397762	7.48685	-2.59124	0.0116648	0.999824	-3.3883
AL731571.1	-0.461172	1.31888	-2.58854	0.0117482	0.999824	-3.81369
FCRLA	0.5618	3.5399	2.58824	0.0117576	0.999824	-3.34326
AC005071.1	-0.517057	-0.0435028	-2.58615	0.0118225	0.999824	-4.10287
AC007342.2	-0.912398	-1.77631	-2.58601	0.0118268	0.999824	-4.35236
URB1-AS1	-0.742281	-1.38478	-2.58101	0.011984	0.999824	-4.33718
ECRG4	-0.946492	-2.02199	-2.57937	0.012036	0.999824	-4.39442
C1RL	-0.32932	5.67027	-2.57646	0.0121284	0.999824	-3.32008
OR4P4	0.870428	-2.43948	2.57612	0.0121393	0.999824	-4.41878
GPR141	-0.44021	1.9152	-2.57413	0.012203	0.999824	-3.69713
HCAR3	-0.483969	5.8364	-2.57304	0.0122382	0.999824	-3.33239
CHTF18	0.251747	3.02232	2.56675	0.0124423	0.999824	-3.47587
AC096733.2	0.552649	0.145121	2.5641	0.012529	0.999824	-4.02819
AL353583.1	0.779467	-2.22726	2.56281	0.0125715	0.999824	-4.39576
INTS9-AS1	0.754176	-2.29383	2.56	0.0126646	0.999824	-4.40928
AC092070.4	-1.16367	-2.90187	-2.55954	0.0126797	0.999824	-4.44311
AL109741.1	-0.844842	-1.75083	-2.55096	0.0129678	0.999824	-4.37538
MRTFB	0.321685	2.0698	2.55001	0.0130003	0.999824	-3.65136
SGK1	-0.343731	5.55058	-2.54931	0.0130241	0.999824	-3.35182
RCBTB2	-0.287326	5.22359	-2.54925	0.0130259	0.999824	-3.34537
CCT8P1	-0.813574	-1.63948	-2.54798	0.0130693	0.999824	-4.32907
EID2B	0.377158	0.1755	2.54716	0.0130974	0.999824	-4.06805
BCL3	-0.388415	5.79655	-2.54613	0.0131328	0.999824	-3.36095
ATP6V1E1	-0.261189	5.40284	-2.54303	0.0132393	0.999824	-3.35358
AC244258.1	-0.854515	-2.24582	-2.54275	0.0132491	0.999824	-4.39793
GPAT3	-0.449819	4.85674	-2.54041	0.0133303	0.999824	-3.35659
QPCT	-0.494803	6.10153	-2.53516	0.0135142	0.999824	-3.38354
HES2	0.644208	-1.3892	2.53377	0.013563	0.999824	-4.32634
PFKFB3	-0.419404	5.54085	-2.53158	0.0136406	0.999824	-3.37106
TLR5	-0.37924	3.82751	-2.5279	0.0137719	0.999824	-3.41921
ARFGAP3	-0.199096	4.68853	-2.5257	0.013851	0.999824	-3.37473
ARPC3	-0.304858	7.15987	-2.51874	0.0141037	0.999824	-3.44614
HNRNPH2	-0.252522	6.09343	-2.51785	0.0141363	0.999824	-3.40309
KDM2B-DT	-0.76125	-2.1042	-2.51526	0.0142316	0.999824	-4.40301
NLRP12	-0.401953	6.33768	-2.5124	0.0143372	0.999824	-3.41939
AP001178.3	-0.411035	0.0873487	-2.50849	0.0144831	0.999824	-4.1219
AC002116.2	-0.923483	-2.5966	-2.50788	0.014506	0.999824	-4.44218
SH3BGR	-0.734641	-1.90917	-2.5078	0.0145092	0.999824	-4.37736
ARID4A	-0.202354	5.48863	-2.50713	0.0145343	0.999824	-3.39933
LCMT1-AS2	0.469727	-0.823045	2.5035	0.0146714	0.999824	-4.26339
GSEC	-0.405251	2.33216	-2.50243	0.0147118	0.999824	-3.66913
AC005520.1	1.45236	-2.22204	2.50182	0.0147352	0.999824	-4.41117
HSD17B11	-0.303781	6.73226	-2.4988	0.0148507	0.999824	-3.45161
WNT16	0.586387	-1.05155	2.49852	0.0148613	0.999824	-4.24199
ZFP36L1	-0.284783	7.9377	-2.49455	0.0150141	0.999824	-3.51989
AC004542.2	-1.33187	-0.385555	-2.49444	0.0150184	0.999824	-4.22891
EBF1	0.495359	1.23627	2.49406	0.0150331	0.999824	-3.82086
AC120049.1	0.620596	-1.57417	2.48982	0.0151983	0.999824	-4.34126
BCL11A	0.34124	3.73152	2.48617	0.0153421	0.999824	-3.46216
MCHR1	-1.16294	-2.90398	-2.48414	0.0154224	0.999824	-4.47546
PTPRE	-0.25895	6.76922	-2.48169	0.0155196	0.999824	-3.47351
SGCE	0.335116	0.530247	2.47857	0.0156447	0.999824	-4.0083
STEAP4	-0.460112	7.20153	-2.4763	0.015736	0.999824	-3.49913
ZIK1	0.277288	1.77295	2.47558	0.015765	0.999824	-3.77151
AL390726.4	-1.38252	-2.99863	-2.47489	0.0157931	0.999824	-4.47377
HEXB	-0.201011	5.37688	-2.47398	0.0158299	0.999824	-3.43512
AC008738.7	-1.68819	-3.11798	-2.46972	0.0160039	0.999824	-4.4946
AC011468.1	0.572785	-1.6339	2.46898	0.0160343	0.999824	-4.36818
AC073257.1	0.66388	-1.66364	2.46793	0.0160774	0.999824	-4.37011
KIAA0753	-0.205551	2.93921	-2.46214	0.0163174	0.999824	-3.58535
TECPR2	-0.451722	6.01737	-2.46159	0.0163404	0.999824	-3.4657
C12orf74	1.01384	-2.84309	2.46031	0.0163939	0.999824	-4.45165
EML2-AS1	1.52959	-2.69749	2.46005	0.0164047	0.999824	-4.44281
SLC26A8	-0.501977	2.54591	-2.45964	0.016422	0.999824	-3.68575
PROK2	-0.639716	6.36225	-2.45875	0.0164593	0.999824	-3.48461
ASS1P2	-0.852806	-2.60085	-2.45382	0.0166679	0.999824	-4.43546
ACSL1	-0.539153	8.88644	-2.44894	0.0168765	0.999824	-3.61501
LINC02656	-0.505678	0.473441	-2.44744	0.016941	0.999824	-4.0762
AP002851.1	0.710045	-1.82641	2.44714	0.0169543	0.999824	-4.39751
ASNS	-0.470977	2.42767	-2.44632	0.0169895	0.999824	-3.69904
ORM2	-0.716337	0.0174033	-2.44574	0.0170146	0.999824	-4.17523
ZC3H12A	-0.176015	4.11722	-2.4452	0.0170381	0.999824	-3.48985
IL1R1	-0.453232	3.44755	-2.44469	0.0170603	0.999824	-3.54868
TBC1D27P	0.592997	0.987775	2.44442	0.0170718	0.999824	-3.93751
PRCP	-0.274991	5.98803	-2.44428	0.0170782	0.999824	-3.48399
PIK3C2B	0.289239	3.65621	2.44317	0.0171261	0.999824	-3.51617
RGS2	-0.440518	8.09576	-2.44301	0.0171332	0.999824	-3.57542
AC004846.2	-0.554938	-0.484194	-2.43986	0.0172713	0.999824	-4.23825
AC026464.6	1.29572	-0.967915	2.43902	0.0173081	0.999824	-4.28997
AC084871.3	-0.556056	0.701134	-2.4378	0.017362	0.999824	-4.04835
AC116348.2	0.641929	-2.3255	2.43732	0.0173829	0.999824	-4.40908
PSMC1	-0.202682	4.99011	-2.43515	0.0174789	0.999824	-3.47778
SIGLEC9	-0.312921	5.33432	-2.43423	0.0175201	0.999824	-3.48099
FPGT-TNNI3K	0.498618	-1.06297	2.43255	0.017595	0.999824	-4.31155
TRIP4	-0.213335	3.64282	-2.43009	0.0177047	0.999824	-3.54541
ARID4B	-0.183356	5.94146	-2.43001	0.0177085	0.999824	-3.50085
AC027097.2	0.245012	2.07982	2.42997	0.0177105	0.999824	-3.75975
AL118558.4	-0.748267	-2.50024	-2.42354	0.018001	0.999824	-4.44277
HIST2H2AA3	-1.28683	3.05595	-2.42053	0.0181388	0.999824	-3.71483
AC096970.1	-0.766043	-1.75911	-2.41823	0.0182445	0.999824	-4.38696
ZNF438	-0.330008	3.59379	-2.41806	0.0182524	0.999824	-3.56656
PDE6B	0.235794	1.90539	2.41788	0.0182607	0.999824	-3.82679
HP	-0.721817	2.36587	-2.41747	0.0182795	0.999824	-3.75318
SLED1	-0.911816	-2.11029	-2.41626	0.0183355	0.999824	-4.41941
AC004231.1	-1.00595	-2.4835	-2.41387	0.0184468	0.999824	-4.46434
ZNF350	-0.223466	3.15018	-2.4117	0.0185478	0.999824	-3.62148
CPEB1	0.44988	0.731131	2.41045	0.0186065	0.999824	-4.05728
DOK3	-0.378212	7.41889	-2.40963	0.018645	0.999824	-3.5778
FARP2	0.196383	2.98987	2.40643	0.018796	0.999824	-3.626
AC073342.2	-0.489348	0.109655	-2.40588	0.0188222	0.999824	-4.1547
AC093583.1	-0.951244	-2.53652	-2.4051	0.018859	0.999824	-4.44316
PPIAP39	-0.669824	-0.837709	-2.40505	0.0188614	0.999824	-4.29361
AP002490.1	0.371096	1.51603	2.40337	0.0189417	0.999824	-3.88565
CPLANE1	0.304285	1.58325	2.40318	0.0189508	0.999824	-3.86887
CEACAM3	-0.423595	6.03154	-2.39918	0.0191423	0.999824	-3.53583
JUNB	-0.293678	7.38686	-2.39565	0.0193127	0.999824	-3.5936
ETS2	-0.34252	5.14136	-2.39547	0.0193216	0.999824	-3.52376
PLEK	-0.233005	7.82445	-2.39464	0.019362	0.999824	-3.61578
FAM245A	0.830671	-2.50454	2.39262	0.0194605	0.999824	-4.43732
DDIT3	-0.342924	2.52657	-2.39046	0.019566	0.999824	-3.73774
ANO10	-0.273189	3.44178	-2.38972	0.0196025	0.999824	-3.60953
RFC5	0.204324	2.19365	2.38858	0.0196589	0.999824	-3.7734
CDK7	-0.202013	2.69655	-2.38579	0.0197967	0.999824	-3.70148
AC010867.1	0.856496	-2.54772	2.38205	0.0199828	0.999824	-4.45419
GTF2IP20	-0.218203	3.33034	-2.37919	0.0201266	0.999824	-3.63377
ZNF691	0.168969	2.34997	2.37804	0.0201844	0.999824	-3.76937
MPV17L	0.279753	3.49941	2.37761	0.0202062	0.999824	-3.60852
ZNF573	0.406209	0.0429264	2.37735	0.0202193	0.999824	-4.13497
CARD16	-0.410544	3.49222	-2.3767	0.0202521	0.999824	-3.63092
LINC01002	-0.460335	7.66113	-2.37669	0.0202529	0.999824	-3.62411
PLA2G7	-0.482895	1.9117	-2.37581	0.0202973	0.999824	-3.85057
TRAV39	-0.665467	-1.57238	-2.37566	0.0203048	0.999824	-4.3838
TNFAIP3	-0.273919	5.03088	-2.37475	0.0203511	0.999824	-3.54667
GHITM	-0.18395	6.49055	-2.37399	0.02039	0.999824	-3.57955
AQP9	-0.45473	8.79556	-2.37326	0.0204268	0.999824	-3.68311
AC087289.2	0.693971	-1.64484	2.37257	0.0204625	0.999824	-4.39624
ZMYND19	0.234797	2.5818	2.37176	0.0205037	0.999824	-3.73011
INKA1	0.412333	0.347215	2.3711	0.0205373	0.999824	-4.13605
JAK3	-0.228402	7.55707	-2.37101	0.0205418	0.999824	-3.62399
PIM3	-0.294478	5.89061	-2.36857	0.0206674	0.999824	-3.56761
DENND5B	0.539964	1.51381	2.36832	0.0206806	0.999824	-3.86543
NDUFAF1	-0.210361	2.99844	-2.36764	0.0207154	0.999824	-3.68631
NME8	-0.406931	1.16043	-2.36707	0.0207448	0.999824	-3.99051
AC009318.2	-0.6828	-1.43663	-2.3662	0.0207898	0.999824	-4.36735
FAM238A	-0.411931	-0.27754	-2.36585	0.020808	0.999824	-4.24844
SMPDL3A	-0.352756	1.63305	-2.36257	0.0209787	0.999824	-3.90213
ATP6V1C1	-0.202779	4.68728	-2.36083	0.0210699	0.999824	-3.56486
TSPAN13	0.455384	2.22661	2.36013	0.0211064	0.999824	-3.74997
AC022973.5	-0.893452	-1.4471	-2.35925	0.0211532	0.999824	-4.36137
JAML	-0.31542	9.2087	-2.35916	0.0211576	0.999824	-3.71449
HCAR2	-0.44692	5.67094	-2.359	0.021166	0.999824	-3.57408
BAZ2B	-0.303866	5.45138	-2.35843	0.0211962	0.999824	-3.56936
PLEKHG1	0.476132	1.89683	2.35826	0.0212048	0.999824	-3.81141
IL27	-0.552221	-1.01959	-2.35712	0.0212652	0.999824	-4.33611
TNFRSF8	-0.307696	3.34333	-2.35605	0.0213217	0.999824	-3.65269
AL162258.2	0.551854	-0.811642	2.35417	0.0214218	0.999824	-4.31496
AC068580.1	-0.724081	-2.40876	-2.35394	0.0214342	0.999824	-4.43905
KIAA0556	-0.223528	4.35521	-2.35309	0.0214794	0.999824	-3.58255
LINC01962	0.484091	-0.0490082	2.35044	0.0216211	0.999824	-4.20962
ZNF451-AS1	0.471831	-0.731602	2.34974	0.0216584	0.999824	-4.28388
NAMPT	-0.475153	9.8222	-2.34934	0.02168	0.999824	-3.75634
SLC18A1	-1.0111	-2.54359	-2.34888	0.0217051	0.999824	-4.46598
PPP1R3B	-0.404786	6.10069	-2.34587	0.0218675	0.999824	-3.59783
SERPINB2	-0.58058	0.599869	-2.34487	0.021922	0.999824	-4.09606
RAD50	0.27232	3.33956	2.3425	0.022051	0.999824	-3.65853
MCTP2	-0.31354	5.56106	-2.33454	0.0224896	0.999824	-3.59849
GPR42	-1.35604	-3.00815	-2.33426	0.0225047	0.999824	-4.47449
SLC12A2	0.249697	1.97543	2.33247	0.0226045	0.999824	-3.84791
MAP3K10	0.216838	3.45353	2.33007	0.0227392	0.999824	-3.66736
HAR1B	0.512696	-1.39542	2.32766	0.0228745	0.999824	-4.37734
ANKRD16	0.283013	1.1141	2.32754	0.0228814	0.999824	-4.01819
AC015969.1	0.679153	-2.09197	2.32402	0.0230811	0.999824	-4.42774
NARF-IT1	-0.439118	-0.502843	-2.3238	0.0230931	0.999824	-4.27095
AC005280.2	-0.446298	2.19259	-2.32368	0.0231001	0.999824	-3.84253
AL451165.2	-0.602554	-0.534104	-2.32073	0.0232686	0.999824	-4.2949
TUBG1	0.22987	1.80935	2.32022	0.023298	0.999824	-3.91501
AC145098.1	-0.418146	1.29062	-2.31925	0.0233534	0.999824	-4.00382
AC092718.4	0.550374	-1.33131	2.31883	0.0233776	0.999824	-4.36125
AC018695.6	0.712971	-2.32514	2.31821	0.0234133	0.999824	-4.45173
AC099343.3	-0.226579	2.11713	-2.31515	0.0235904	0.999824	-3.86146
IFNLR1	0.438167	1.74703	2.31514	0.0235904	0.999824	-3.88076
TARBP2	0.193764	3.02598	2.31285	0.0237239	0.999824	-3.73212
ATP6V1D	-0.288132	3.67612	-2.31174	0.0237883	0.999824	-3.67304
MCTP1	-0.310432	4.01677	-2.31136	0.0238109	0.999824	-3.64256
CCPG1	-0.324095	6.52743	-2.31104	0.0238297	0.999824	-3.65036
AC008764.10	0.711398	-2.25244	2.31085	0.0238405	0.999824	-4.44896
MARCH9	0.233738	4.16151	2.30723	0.0240531	0.999824	-3.63951
SPG7	0.131843	6.32472	2.30435	0.0242235	0.999824	-3.64976
KCTD21	-0.23457	3.46774	-2.30375	0.0242593	0.999824	-3.69508
LIMK2	-0.350961	7.27163	-2.30292	0.0243085	0.999824	-3.68426
RANGRF	0.207484	3.10355	2.30244	0.0243372	0.999824	-3.7313
CD79B	0.432734	5.52938	2.30228	0.0243467	0.999824	-3.63909
AL022324.2	-0.906411	-2.62536	-2.30063	0.0244456	0.999824	-4.47342
FMC1	0.290131	1.12366	2.29939	0.0245195	0.999824	-4.03053
SIRPA	-0.366256	7.43418	-2.29801	0.0246027	0.999824	-3.69828
AC007877.1	-0.525611	0.955903	-2.29526	0.0247687	0.999824	-4.07017
GALNT14	-0.599029	1.06524	-2.29347	0.0248769	0.999824	-4.06237
AC016394.1	-0.576903	-2.08227	-2.29193	0.0249706	0.999824	-4.43023
DRAM1	-0.248712	3.39898	-2.29151	0.0249966	0.999824	-3.70898
LMNB1	-0.299886	5.34988	-2.29078	0.0250413	0.999824	-3.6423
FCAR	-0.453306	4.82402	-2.29061	0.0250514	0.999824	-3.6418
AC132812.1	-0.27244	2.80399	-2.29015	0.0250794	0.999824	-3.78924
IFNGR2	-0.307735	7.02652	-2.28947	0.0251214	0.999824	-3.69007
ST3GAL2	-0.254266	6.31403	-2.28775	0.0252271	0.999824	-3.66606
TMEM185B	-0.18746	4.43384	-2.28391	0.0254643	0.999824	-3.65529
NACA	-0.240193	7.80603	-2.28384	0.0254688	0.999824	-3.72273
CFAP58	-0.499843	0.236876	-2.27989	0.0257148	0.999824	-4.17171
HAUS5	0.205339	3.05837	2.27862	0.025794	0.999824	-3.76102
TOPORS	-0.274507	4.74485	-2.27791	0.025839	0.999824	-3.65565
HAUS1P1	-0.772422	-1.69299	-2.2777	0.025852	0.999824	-4.4006
SLC22A4	-0.399864	4.0154	-2.27743	0.0258691	0.999824	-3.68179
AC015871.1	-0.324763	3.47652	-2.27393	0.0260898	0.999824	-3.72585
SARS2	0.262398	2.61143	2.27339	0.0261242	0.999824	-3.82167
HNRNPH3	-0.160971	6.5129	-2.2721	0.0262063	0.999824	-3.69093
GPR37L1	-0.468932	-0.844526	-2.27106	0.0262723	0.999824	-4.32778
IGKV1-12	2.05726	-1.87257	2.26938	0.0263798	0.999824	-4.44624
AC022762.2	-0.35108	0.446041	-2.26711	0.0265254	0.999824	-4.16293
GNG7	0.326003	4.11374	2.26652	0.0265634	0.999824	-3.68099
AC023024.1	0.619228	-1.04176	2.26614	0.0265876	0.999824	-4.34793
PHLDA3	0.621412	-1.18758	2.26362	0.0267505	0.999824	-4.37493
GABRR2	-0.543129	1.03135	-2.2632	0.0267781	0.999824	-4.09094
MCF2L-AS1	0.798133	-2.32334	2.26207	0.0268511	0.999824	-4.46883
HCK	-0.336733	8.4349	-2.26087	0.0269298	0.999824	-3.77294
PCAT19	0.720306	-1.7241	2.25947	0.0270211	0.999824	-4.41748
PPP1R26-AS1	0.508232	-1.26797	2.25823	0.027102	0.999824	-4.37776
NOXRED1	-0.482098	-1.0724	-2.25814	0.0271079	0.999824	-4.3553
HIP1R	0.267632	4.705	2.25511	0.0273073	0.999824	-3.68094
LLPH	-0.15518	3.96085	-2.25451	0.0273466	0.999824	-3.70746
LINC02595	0.606951	-1.83926	2.25223	0.027498	0.999824	-4.42393
PPM1H	-0.379184	1.03836	-2.25159	0.0275402	0.999824	-4.06941
AC006128.1	0.247583	2.40107	2.25128	0.0275611	0.999824	-3.87137
CLEC18B	-1.25055	-1.56302	-2.25113	0.0275709	0.999824	-4.401
GPR27	-0.425999	4.31589	-2.25031	0.0276256	0.999824	-3.69426
FAM178B	-0.838476	-2.08431	-2.25021	0.0276322	0.999824	-4.45722
MUS81	0.129131	4.55584	2.25014	0.0276368	0.999824	-3.68985
MIR4435-2HG	-0.225262	3.84751	-2.24957	0.0276752	0.999824	-3.72423
ALPK3	-0.426014	-0.289445	-2.24952	0.0276782	0.999824	-4.28105
MCEMP1	-0.535808	3.65206	-2.24819	0.0277674	0.999824	-3.7417
P2RX5	0.421995	4.62292	2.24812	0.0277722	0.999824	-3.68924
MSX2P1	-0.834815	-1.46633	-2.24807	0.0277754	0.999824	-4.40847
PYGL	-0.443833	7.63101	-2.24734	0.0278243	0.999824	-3.7536
SLC25A44	-0.261469	5.7614	-2.24635	0.0278904	0.999824	-3.69616
AC004528.1	0.729483	-1.89186	2.24454	0.0280128	0.999824	-4.45035
LUC7L	0.188757	4.86225	2.24282	0.0281287	0.999824	-3.69354
RTN3	-0.347178	7.85512	-2.24066	0.0282753	0.999824	-3.76916
TNFRSF13B	0.554257	1.37693	2.23944	0.0283586	0.999824	-4.01176
AC091132.1	-1.11266	-1.78253	-2.23868	0.0284103	0.999824	-4.43204
CREB5	-0.435457	6.45305	-2.23842	0.0284282	0.999824	-3.72527
AC090559.1	-0.234468	5.76715	-2.23577	0.0286102	0.999824	-3.70805
TCF4	0.358944	3.55206	2.2352	0.0286495	0.999824	-3.74046
DNAH17	-0.323266	3.35652	-2.23335	0.0287766	0.999824	-3.7777
PSMC3IP	-0.295517	0.110659	-2.23182	0.0288824	0.999824	-4.21226
TLR1	-0.309118	6.01523	-2.23171	0.0288902	0.999824	-3.71948
DNAJA2	-0.143888	4.99507	-2.23044	0.0289783	0.999824	-3.70599
FBXO10	0.340953	1.81873	2.23035	0.028985	0.999824	-3.94697
C9orf131	-0.754915	-2.22168	-2.23029	0.0289892	0.999824	-4.45942
IL10RB	-0.243293	6.10409	-2.23001	0.0290082	0.999824	-3.72124
FAM171A2	0.716926	-1.84299	2.22962	0.0290357	0.999824	-4.43362
ITGA11	0.469084	-0.0910896	2.22925	0.0290616	0.999824	-4.24384
LARGE2	0.412604	1.95231	2.22738	0.0291919	0.999824	-3.91174
CD55	-0.324977	6.86889	-2.22652	0.0292521	0.999824	-3.74806
AHNAK2	0.61395	-1.1743	2.22637	0.0292625	0.999824	-4.36294
FLOT2	-0.306111	8.41988	-2.2262	0.0292748	0.999824	-3.80486
AC083855.2	0.622641	-1.45267	2.22577	0.0293046	0.999824	-4.40784
PLBD1	-0.351451	7.19092	-2.2257	0.0293099	0.999824	-3.75823
TNFSF14	-0.290758	5.62281	-2.22347	0.0294668	0.999824	-3.71871
MTF1	-0.225886	4.74362	-2.22342	0.0294701	0.999824	-3.71461
FAM157A	-0.429483	8.50079	-2.22224	0.0295533	0.999824	-3.80968
PIK3IP1-AS1	-0.647372	-1.70723	-2.22146	0.0296085	0.999824	-4.42452
TRIM25	-0.289851	7.44117	-2.21909	0.0297774	0.999824	-3.77406
TNFRSF10B	-0.200417	5.74769	-2.21902	0.0297824	0.999824	-3.72722
NFIL3	-0.394068	5.236	-2.21812	0.029846	0.999824	-3.71977
KLF15	0.50369	-1.11732	2.21806	0.0298505	0.999824	-4.37349
TM6SF1	-0.317674	3.99379	-2.21723	0.0299096	0.999824	-3.74501
NFE2	-0.328886	7.40241	-2.21656	0.0299576	0.999824	-3.77383
SYT2	-0.472964	0.0570452	-2.21628	0.0299777	0.999824	-4.2452
GJB6	-0.928608	-1.96155	-2.21586	0.0300076	0.999824	-4.45328
MTHFD1	0.188228	3.97084	2.2147	0.030091	0.999824	-3.74791
OR52B3P	-0.677821	-1.44677	-2.2146	0.0300981	0.999824	-4.40237
G0S2	-0.634989	0.111015	-2.21444	0.0301102	0.999824	-4.24288
CARNS1	0.337269	2.94867	2.21373	0.0301608	0.999824	-3.81578
AC011912.1	0.387428	-0.693079	2.21323	0.0301972	0.999824	-4.33692
AC015912.3	-0.651424	-1.08667	-2.21211	0.030278	0.999824	-4.37951
GGH	-0.458638	-0.0336349	-2.21179	0.030301	0.999824	-4.25563
SFTPD-AS1	0.45083	-0.0575449	2.21016	0.0304189	0.999824	-4.24493
ALPK1	-0.330201	5.85409	-2.21007	0.030426	0.999824	-3.73715
HRH2	-0.379354	6.65217	-2.20952	0.0304655	0.999824	-3.75939
HLA-DOA	0.300348	4.68559	2.20949	0.0304677	0.999824	-3.72997
AC010894.5	-0.370344	1.52375	-2.20803	0.0305738	0.999824	-4.04798
EPS8L2	0.247375	1.43875	2.2077	0.0305982	0.999824	-4.03771
SETBP1	0.374144	1.87733	2.20573	0.0307419	0.999824	-3.95254
PLIN4	-0.389759	3.99661	-2.20518	0.0307826	0.999824	-3.7625
LDLRAD2	0.85708	-1.82047	2.2016	0.0310455	0.999824	-4.42977
MAPK14	-0.318445	6.92303	-2.20127	0.03107	0.999824	-3.77581
ATP6AP2	-0.168302	6.15244	-2.19987	0.0311741	0.999824	-3.75614
RBM4B	0.178321	3.29739	2.19966	0.0311893	0.999824	-3.80778
AC234781.1	-1.4956	-2.17074	-2.19958	0.0311956	0.999824	-4.44882
TESK1	0.149213	3.9688	2.19896	0.031241	0.999824	-3.76491
TIMELESS	0.265981	2.85224	2.19836	0.0312859	0.999824	-3.84109
EVI2B	-0.262384	8.68794	-2.19823	0.0312958	0.999824	-3.84164
FABP6	-0.908351	-2.12337	-2.19802	0.031311	0.999824	-4.46198
AL109809.5	-0.302655	2.08655	-2.19773	0.031333	0.999824	-3.9529
SNTG1	0.962625	-2.28163	2.19711	0.0313788	0.999824	-4.47632
TOB1-AS1	0.387005	-0.0900922	2.19629	0.0314403	0.999824	-4.26797
ABITRAM	-0.213816	2.52336	-2.19398	0.0316134	0.999824	-3.89667
ARF4	-0.156869	5.10396	-2.19397	0.0316138	0.999824	-3.74503
NIBAN3	0.463558	5.38299	2.19326	0.0316671	0.999824	-3.75386
HAVCR1	-0.666955	-1.98938	-2.19299	0.0316876	0.999824	-4.43998
MRPL51	-0.362647	3.36402	-2.19253	0.0317218	0.999824	-3.82438
PTPRK	0.398264	0.677657	2.19186	0.0317729	0.999824	-4.11422
AC138649.2	-0.960409	-1.92273	-2.19132	0.0318134	0.999824	-4.45335
FTH1P11	-0.658634	-1.60059	-2.19075	0.0318568	0.999824	-4.41947
GFOD2	-0.167529	4.27094	-2.19017	0.0319004	0.999824	-3.76055
BIN2	-0.190306	8.11825	-2.18878	0.0320056	0.999824	-3.82651
PINLYP	-0.310519	0.665352	-2.18871	0.0320111	0.999824	-4.16978
NRBF2	-0.348577	5.8577	-2.1872	0.0321256	0.999824	-3.7617
CD19	0.486581	3.51402	2.18386	0.0323809	0.999824	-3.78504
SRPK1	-0.332825	5.55265	-2.18376	0.032388	0.999824	-3.76009
AC002310.4	-1.68863	-2.49314	-2.18246	0.0324885	0.999824	-4.45514
TBPL2	-0.373122	-0.888734	-2.17997	0.03268	0.999824	-4.3453
AC034236.2	0.371412	-0.774895	2.17902	0.0327532	0.999824	-4.34058
RELL2	0.218109	2.84503	2.17894	0.03276	0.999824	-3.87397
AC012213.2	0.398568	0.129671	2.17724	0.0328918	0.999824	-4.24498
AC008264.2	-0.24698	2.87023	-2.17569	0.0330122	0.999824	-3.8766
NFE2L2	-0.214921	5.6789	-2.17386	0.033155	0.999824	-3.77268
CDC42EP3	-0.263111	6.39852	-2.1706	0.0334109	0.999824	-3.79306
CARMIL3	0.514244	0.312277	2.16966	0.033485	0.999824	-4.21174
DENND5A	-0.30559	7.03883	-2.16933	0.0335109	0.999824	-3.81138
AC008761.2	-0.856325	-2.61603	-2.16903	0.0335346	0.999824	-4.49407
AC025262.3	2.16483	-3.49195	2.16875	0.0335567	0.999824	-4.52098
MEGF8	0.196594	2.96531	2.16865	0.0335652	0.999824	-3.86284
NPL	-0.320064	6.3002	-2.16772	0.0336385	0.999824	-3.79049
FBXO44	0.189571	3.85162	2.16744	0.033661	0.999824	-3.80559
WT1-AS	0.610709	-1.12329	2.16628	0.0337529	0.999824	-4.3989
AGTPBP1	-0.28234	5.56851	-2.16589	0.0337841	0.999824	-3.78015
TFE3	-0.248993	6.51894	-2.16579	0.0337915	0.999824	-3.79814
CTBP2	-0.233222	5.23154	-2.1656	0.0338073	0.999824	-3.77604
FOSL2	-0.314562	6.86362	-2.16559	0.0338081	0.999824	-3.81004
LINC01094	-0.265473	1.40118	-2.16466	0.0338817	0.999824	-4.06551
ZNF571-AS1	0.325785	-0.274581	2.16463	0.0338843	0.999824	-4.29066
TCN1	-0.534773	1.81907	-2.16379	0.0339516	0.999824	-4.0257
AP002812.5	0.610381	-1.89668	2.16232	0.0340691	0.999824	-4.43929
RPL23AP64	-0.541008	-1.14259	-2.15828	0.0343942	0.999824	-4.36006
AC010883.3	-0.638393	-0.747817	-2.15789	0.0344253	0.999824	-4.34987
AC015802.3	-0.413799	-0.728789	-2.15673	0.034519	0.999824	-4.34818
RNF130	-0.248533	7.36508	-2.15332	0.0347969	0.999824	-3.83615
LTA	-0.288	1.83621	-2.1523	0.0348798	0.999824	-4.04221
AL732372.3	-0.429215	5.87963	-2.152	0.0349047	0.999824	-3.79647
IRAK1BP1	0.313854	0.75861	2.15194	0.0349096	0.999824	-4.16425
ICAM1	-0.315031	4.6916	-2.15113	0.0349755	0.999824	-3.79214
NRDC	-0.198174	6.91091	-2.15077	0.0350056	0.999824	-3.82509
GSDME	0.823953	-1.17603	2.1501	0.0350604	0.999824	-4.36781
STAT5B	-0.244647	7.91578	-2.14902	0.035149	0.999824	-3.85913
HIST1H4E	-0.685091	-1.56991	-2.14897	0.0351532	0.999824	-4.44391
AC104463.2	-0.780053	-2.57374	-2.14813	0.0352223	0.999824	-4.48802
LINC02202	0.545013	-1.10524	2.14697	0.0353183	0.999824	-4.37703
AL121972.1	-0.806478	-2.64634	-2.14602	0.0353972	0.999824	-4.48695
AC022150.4	0.422756	0.653648	2.14596	0.0354019	0.999824	-4.18628
HK3	-0.290022	7.19535	-2.14592	0.0354057	0.999824	-3.8379
AC011445.1	-0.377809	1.06376	-2.14517	0.0354675	0.999824	-4.1419
KMT5B	-0.160747	5.03251	-2.14515	0.0354692	0.999824	-3.79636
CSF2RA	-0.305968	4.89461	-2.14379	0.0355825	0.999824	-3.7983
CNBP	-0.185	7.25173	-2.14375	0.0355857	0.999824	-3.84248
AL450267.2	1.11019	-1.56943	2.14314	0.0356362	0.999824	-4.42882
TRAF4	0.343	2.71908	2.14269	0.035674	0.999824	-3.90362
CAPN3	0.220514	3.02921	2.14183	0.0357453	0.999824	-3.88706
MYD88	-0.239885	7.44335	-2.14018	0.0358835	0.999824	-3.85125
MAP3K20	-0.230038	3.28158	-2.13973	0.0359213	0.999824	-3.86568
AREL1	-0.196345	5.67066	-2.1393	0.0359578	0.999824	-3.80832
LINC01093	-0.92058	-2.82309	-2.13915	0.0359703	0.999824	-4.49171
ENPP6	0.567431	-1.77873	2.13907	0.0359765	0.999824	-4.43661
WEE1	0.265528	2.01994	2.13879	0.0360007	0.999824	-3.99687
PIK3R5	-0.191324	7.39787	-2.13781	0.0360827	0.999824	-3.85229
NQO2	-0.312613	5.65741	-2.13776	0.0360868	0.999824	-3.8099
AP1S3	0.45338	1.57852	2.13755	0.0361046	0.999824	-4.0535
TMED6	-0.829176	-1.70946	-2.13594	0.0362404	0.999824	-4.43966
AL049634.2	-0.774405	0.013187	-2.13558	0.0362715	0.999824	-4.2848
MTO1	0.14083	4.1032	2.13515	0.036308	0.999824	-3.82296
OSCAR	-0.29713	5.46006	-2.13509	0.0363128	0.999824	-3.80864
RPP30	0.154706	2.82408	2.13497	0.0363229	0.999824	-3.9164
BX005214.2	1.10647	-2.89068	2.13412	0.0363947	0.999824	-4.50939
ADM	-0.485218	4.65647	-2.13385	0.0364182	0.999824	-3.81091
DRD4	0.460186	-1.59575	2.13375	0.0364268	0.999824	-4.42869
PLD1	-0.237456	2.24188	-2.13138	0.0366282	0.999824	-3.98038
AC009237.3	-0.541206	-1.57335	-2.13064	0.0366911	0.999824	-4.42954
WDR34	0.353326	1.82692	2.13046	0.036707	0.999824	-4.02294
NANS	-0.14748	3.87113	-2.12956	0.0367838	0.999824	-3.84229
AC123595.2	-0.87082	-1.14291	-2.12868	0.0368592	0.999824	-4.399
ARHGEF11	-0.274982	5.69348	-2.12847	0.0368776	0.999824	-3.81875
GLT1D1	-0.385062	6.6675	-2.12698	0.0370056	0.999824	-3.84098
AC010300.1	0.383304	-0.726855	2.12583	0.0371045	0.999824	-4.3583
ERP27	-0.210439	1.59859	-2.12571	0.0371146	0.999824	-4.08101
AC025279.1	0.368148	2.64667	2.12521	0.0371584	0.999824	-3.91889
AP003065.2	-0.277162	2.13464	-2.12419	0.037246	0.999824	-4.00519
CHSY1	-0.311784	4.95266	-2.12306	0.0373442	0.999824	-3.81939
UGT8	0.535208	-0.474678	2.12299	0.0373504	0.999824	-4.30561
AC005899.1	0.726785	-2.3239	2.12274	0.0373723	0.999824	-4.47945
STK3	-0.230151	2.29407	-2.12132	0.037496	0.999824	-3.98199
AL445531.1	0.403574	-0.596998	2.12026	0.0375881	0.999824	-4.34282
SLC37A3	-0.341464	3.92187	-2.12018	0.0375948	0.999824	-3.84575
ADTRP	-0.473311	1.22167	-2.1199	0.0376192	0.999824	-4.14131
SIGLEC15	-0.313391	0.530525	-2.11861	0.037732	0.999824	-4.20788
AC019254.1	-0.757617	-2.62517	-2.11691	0.0378811	0.999824	-4.4862
ZNF765	0.191887	2.6765	2.11623	0.0379415	0.999824	-3.9373
PLAUR	-0.355568	5.69426	-2.11504	0.0380459	0.999824	-3.8326
C1QA	0.531244	1.22651	2.11465	0.0380806	0.999824	-4.1482
CD72	0.441388	3.32926	2.10798	0.0386733	0.999824	-3.87492
RELB	-0.278624	4.80394	-2.10793	0.0386782	0.999824	-3.83565
NAB2	0.19666	2.76295	2.10448	0.0389878	0.999824	-3.93744
CYTIP	-0.19691	6.70441	-2.10429	0.039005	0.999824	-3.86531
BCL6	-0.43264	8.10706	-2.10335	0.0390898	0.999824	-3.90873
IRAK3	-0.385371	5.77662	-2.10286	0.0391342	0.999824	-3.84718
AL031777.3	-0.48703	1.2387	-2.10229	0.0391857	0.999824	-4.14648
GPLD1	0.452133	0.153752	2.09962	0.0394273	0.999824	-4.26747
C11orf24	0.209559	2.71531	2.09942	0.0394457	0.999824	-3.94939
ANP32A	-0.204782	7.16134	-2.09921	0.0394654	0.999824	-3.88255
FOXL2NB	0.444795	-0.233237	2.09864	0.039517	0.999824	-4.30242
CD58	-0.295463	3.39326	-2.09801	0.0395744	0.999824	-3.8976
ANKRD36C	-0.328535	2.0584	-2.09777	0.0395962	0.999824	-4.03718
SLC12A9	-0.249034	7.47776	-2.09768	0.0396043	0.999824	-3.8929
BEND3P3	-0.893839	-1.90178	-2.09723	0.039646	0.999824	-4.44429
ZNF860	0.642725	-0.0547082	2.09668	0.0396961	0.999824	-4.23662
IL6R	-0.301349	8.31808	-2.09658	0.0397055	0.999824	-3.92022
MYH14	0.704172	-2.02101	2.09535	0.0398183	0.999824	-4.46016
LTBR	-0.266045	5.4813	-2.09468	0.0398796	0.999824	-3.85069
FCGR2A	-0.34829	8.88686	-2.09454	0.0398921	0.999824	-3.94126
PRMT1	0.16866	4.89821	2.0942	0.039924	0.999824	-3.84965
LINC00877	-0.307136	3.48388	-2.09368	0.0399715	0.999824	-3.89416
TNIP1	-0.273882	7.81537	-2.09324	0.040012	0.999824	-3.90661
CSF2RB	-0.376311	8.59405	-2.09248	0.0400823	0.999824	-3.93606
TRAPPC6A	0.203737	3.52054	2.09172	0.0401521	0.999824	-3.89861
E2F5	0.320334	2.40745	2.09169	0.0401548	0.999824	-3.97996
SIRPB2	-0.292837	6.23849	-2.09097	0.0402217	0.999824	-3.86866
ATAD3A	0.185673	3.38269	2.08975	0.0403352	0.999824	-3.90945
CCNYL2	0.306739	-0.0587738	2.08936	0.0403706	0.999824	-4.30102
LILRB5	-0.345925	3.25847	-2.08909	0.0403963	0.999824	-3.91604
DPRXP2	-0.803421	-2.41718	-2.08819	0.0404797	0.999824	-4.49144
CAMKK2	-0.288321	6.598	-2.08787	0.0405097	0.999824	-3.87865
AC092953.2	-0.557021	-0.54301	-2.08785	0.0405112	0.999824	-4.34131
ASAP1	-0.27873	6.01312	-2.08777	0.040519	0.999824	-3.86623
AC008514.1	-0.713214	-1.46618	-2.08754	0.04054	0.999824	-4.43624
NTSR1	-0.76321	0.0621434	-2.08744	0.04055	0.999824	-4.29877
MVD	0.199153	3.89874	2.08564	0.0407182	0.999824	-3.88444
FBXW9	0.297559	0.591329	2.08525	0.0407542	0.999824	-4.21836
TNFAIP6	-0.668605	3.16013	-2.08502	0.040776	0.999824	-3.95054
RSF1	-0.121662	5.12572	-2.08316	0.0409504	0.999824	-3.86044
FZD4	0.611737	-1.29973	2.08282	0.0409823	0.999824	-4.41913
AFF3	0.367656	3.06219	2.08214	0.0410459	0.999824	-3.91201
RAB30	0.31783	2.96509	2.08076	0.0411763	0.999824	-3.92267
AL049840.3	-0.606171	0.635832	-2.07998	0.0412503	0.999824	-4.22012
OR4K13	-0.735146	-1.94177	-2.07878	0.0413641	0.999824	-4.46404
CANT1	-0.242533	6.29816	-2.07872	0.0413701	0.999824	-3.88074
HLA-DPB1	0.312883	7.23975	2.07858	0.0413831	0.999824	-3.90622
RNASEH2C	0.173973	4.675	2.07813	0.0414256	0.999824	-3.86794
ALPL	-0.621429	7.30009	-2.07619	0.0416099	0.999824	-3.90698
CPT1C	0.411667	-0.516892	2.07595	0.0416334	0.999824	-4.35846
AC015802.1	-0.465035	1.39195	-2.0758	0.0416473	0.999824	-4.12942
HSPA1L	-0.195088	2.42265	-2.07516	0.0417088	0.999824	-4.00748
AL162458.1	0.208243	2.85603	2.07458	0.0417644	0.999824	-3.96589
CLEC4E	-0.454782	5.44636	-2.07451	0.0417706	0.999824	-3.87026
APOL4	0.372284	0.743319	2.0724	0.0419731	0.999824	-4.22735
MARC1	-0.372419	4.63137	-2.07237	0.0419763	0.999824	-3.87513
MOB3B	0.225414	1.50124	2.0722	0.0419919	0.999824	-4.09844
GTF2B	-0.289721	3.39765	-2.07173	0.0420372	0.999824	-3.92732
MNDA	-0.319053	9.94242	-2.07122	0.0420869	0.999824	-3.99605
HCN1	0.588981	-1.98696	2.06956	0.0422461	0.999824	-4.47038
DEFA1	-1.72341	3.59035	-2.06915	0.0422866	0.999824	-3.92502
AC016747.3	-0.377833	-0.718302	-2.06914	0.0422873	0.999824	-4.37413
ANO9	0.235701	4.50604	2.06867	0.0423328	0.999824	-3.87923
MKNK1	-0.252763	5.97582	-2.06826	0.0423719	0.999824	-3.88407
WDFY3	-0.383655	5.24093	-2.06815	0.0423828	0.999824	-3.8767
OSBPL7	0.191341	3.68775	2.06728	0.0424669	0.999824	-3.90976
LCP1	-0.250872	10.5299	-2.06723	0.0424722	0.999824	-4.02201
AP006623.1	0.414062	-0.97729	2.06681	0.0425125	0.999824	-4.40059
AAAS	0.152454	4.01172	2.06678	0.0425159	0.999824	-3.89485
RAF1	-0.240819	7.60074	-2.06656	0.0425374	0.999824	-3.92539
L3MBTL4	0.408165	0.139657	2.06611	0.042581	0.999824	-4.27691
IL4R	-0.261796	7.15476	-2.06605	0.0425869	0.999824	-3.91579
DISP1	0.238913	0.594989	2.0656	0.0426307	0.999824	-4.21883
LMX1B	0.83514	-2.34554	2.06482	0.0427066	0.999824	-4.48904
NME7	-0.274083	0.918992	-2.06469	0.0427195	0.999824	-4.20804
AEBP1	0.355581	2.28877	2.06364	0.0428214	0.999824	-4.02118
CD22	0.426506	5.43021	2.06207	0.042975	0.999824	-3.88851
HS3ST1	0.425436	0.0381538	2.06113	0.043068	0.999824	-4.27287
TPRN	0.20127	2.59355	2.06092	0.0430886	0.999824	-4.00232
BEST1	-0.316562	5.32832	-2.06053	0.0431268	0.999824	-3.88395
SOD2	-0.374952	9.89649	-2.0602	0.0431592	0.999824	-4.00708
WWOX	0.240349	1.27592	2.06007	0.0431723	0.999824	-4.15439
NIBAN1	-0.423098	7.99687	-2.05803	0.043373	0.999824	-3.94754
FAM161A	0.383583	-0.32202	2.05802	0.0433745	0.999824	-4.3233
LINC01001	-0.3866	7.30082	-2.0574	0.0434354	0.999824	-3.92523
TUBGCP4	0.155196	3.37823	2.05723	0.0434521	0.999824	-3.93283
RPL9P33	-0.710552	-2.30455	-2.05642	0.043533	0.999824	-4.48656
FAM66C	0.475637	-0.810761	2.0562	0.0435543	0.999824	-4.38377
GMPR2	-0.162297	5.52145	-2.05615	0.0435595	0.999824	-3.89003
BICDL2	-0.633537	0.324973	-2.05508	0.0436657	0.999824	-4.28631
RIMBP3	-0.615873	1.03627	-2.0543	0.0437432	0.999824	-4.19639
F5	-0.393532	4.41444	-2.05298	0.0438749	0.999824	-3.89946
LINC00381	-0.701395	-2.28335	-2.0529	0.0438823	0.999824	-4.49151
GTF2IP4	-0.319137	6.82835	-2.05237	0.0439351	0.999824	-3.91872
TMEM192	0.125012	3.55643	2.05197	0.043976	0.999824	-3.92794
MACROD2	0.514331	0.882833	2.05144	0.0440282	0.999824	-4.1836
FSIP2	0.823595	-0.742332	2.04994	0.0441787	0.999824	-4.39116
SQOR	-0.253527	6.13235	-2.04984	0.0441894	0.999824	-3.90446
AC106782.5	-0.742018	-1.68224	-2.04905	0.0442681	0.999824	-4.46292
FTH1P15	-0.358271	2.8389	-2.04856	0.0443173	0.999824	-3.9909
STX3	-0.314015	6.93562	-2.04822	0.0443517	0.999824	-3.92584
AJ003147.2	0.325345	-0.429985	2.04802	0.0443726	0.999824	-4.35156
DUSP3	-0.204273	4.45148	-2.04726	0.0444492	0.999824	-3.90253
FBXL5	-0.256369	7.39898	-2.04685	0.0444906	0.999824	-3.93904
AC011462.4	-0.589281	-2.01632	-2.04616	0.0445602	0.999824	-4.47809
IL17RA	-0.285263	7.90099	-2.04593	0.0445832	0.999824	-3.95285
IFNAR1	-0.239018	6.34516	-2.04583	0.0445932	0.999824	-3.91544
AC245123.1	-0.59828	-2.19692	-2.04518	0.044659	0.999824	-4.47572
AC137936.1	-0.781684	-2.50886	-2.04446	0.0447318	0.999824	-4.49659
PAOX	0.300348	1.1682	2.04427	0.0447516	0.999824	-4.15648
ALDH6A1	0.171131	2.63112	2.0435	0.04483	0.999824	-4.00424
SLCO4C1	-0.307653	3.38881	-2.04149	0.0450348	0.999824	-3.94826
DDB2	0.127653	3.82776	2.04142	0.0450415	0.999824	-3.92742
BACH1-IT1	0.572	-1.69886	2.0399	0.0451967	0.999824	-4.4565
AC105219.1	-0.323655	-0.324959	-2.03952	0.0452359	0.999824	-4.3401
SH3RF3	-0.338807	2.39179	-2.03819	0.0453727	0.999824	-4.04913
AL391832.2	-0.473859	1.6734	-2.03796	0.0453961	0.999824	-4.13426
TSPAN31	0.125087	3.58682	2.03778	0.0454141	0.999824	-3.94412
AL590399.1	0.840199	-1.30043	2.03708	0.0454866	0.999824	-4.43361
RNF144B	-0.325941	4.97177	-2.03616	0.0455812	0.999824	-3.90767
BZW1P2	-0.410892	1.78417	-2.03605	0.0455924	0.999824	-4.11585
C11orf80	0.253943	2.08193	2.03502	0.0456987	0.999824	-4.0624
GK	-0.333621	5.74306	-2.03484	0.0457177	0.999824	-3.91492
AC090241.2	0.457665	-0.811692	2.03416	0.0457882	0.999824	-4.40351
FOXG1-AS1	-0.824405	-2.44293	-2.03286	0.0459226	0.999824	-4.50429
PNOC	0.411869	1.44913	2.03242	0.0459683	0.999824	-4.12207
ABCB4	0.403793	0.508283	2.03151	0.0460631	0.999824	-4.21215
OR51D1	-0.678866	-2.21224	-2.03126	0.046089	0.999824	-4.48715
FPR2	-0.438965	7.06507	-2.03115	0.0461006	0.999824	-3.94455
MAP1LC3B2	-0.313734	2.22254	-2.03102	0.0461138	0.999824	-4.0844
SIGLEC5	-0.500234	5.36796	-2.03035	0.0461836	0.999824	-3.91428
PGM2	-0.234493	4.55387	-2.02946	0.0462767	0.999824	-3.91693
ZNF681	0.350941	0.87372	2.02918	0.0463062	0.999824	-4.2123
ADGRG2	0.522175	-0.888895	2.02897	0.0463277	0.999824	-4.39364
LINC01180	0.900957	-2.63768	2.02801	0.0464284	0.999824	-4.50325
CD180	0.323359	3.86215	2.02788	0.0464425	0.999824	-3.92849
AC116366.3	-1.04944	2.0691	-2.02764	0.0464675	0.999824	-4.0905
PNMA5	0.572213	-2.11833	2.0275	0.0464826	0.999824	-4.47023
AP001636.3	0.436643	-0.503888	2.02725	0.0465084	0.999824	-4.33784
AL139317.5	0.632102	-1.77017	2.02689	0.0465464	0.999824	-4.45845
RBMXL1	-0.179626	3.53007	-2.0268	0.0465554	0.999824	-3.95358
YDJC	0.145899	3.56432	2.02616	0.0466225	0.999824	-3.95451
CTU2	0.181651	2.24967	2.02548	0.0466941	0.999824	-4.06423
IKZF3	0.236243	6.34943	2.02538	0.0467046	0.999824	-3.93759
IFT172	0.193237	2.45822	2.02509	0.0467356	0.999824	-4.0347
ADGRG3	-0.409836	6.98558	-2.02421	0.0468281	0.999824	-3.94839
SLC16A6	-0.255374	3.71111	-2.02408	0.0468419	0.999824	-3.94612
CSF2RBP1	-0.763423	-2.31342	-2.02379	0.0468723	0.999824	-4.47508
CD44	-0.161527	7.92073	-2.02348	0.0469051	0.999824	-3.9756
CETN2	-0.263287	2.77067	-2.02291	0.0469662	0.999824	-4.02465
UPF3AP3	-0.529047	-0.293755	-2.02152	0.047113	0.999824	-4.37391
EXT1	-0.231878	2.84708	-2.02059	0.047212	0.999824	-4.01376
POU2AF1	0.358603	4.32356	2.02045	0.0472265	0.999824	-3.92853
LIN7B	0.306981	0.0535122	2.02018	0.0472557	0.999824	-4.31703
RBMS1P1	-0.587503	-0.287464	-2.01947	0.0473308	0.999824	-4.32912
WDR77	0.140276	3.79528	2.01886	0.0473962	0.999824	-3.94947
IL7	0.554305	-1.07064	2.0186	0.0474239	0.999824	-4.3885
AC124862.1	-0.883574	-2.75267	-2.0182	0.0474668	0.999824	-4.51053
MAPK13	-0.253968	5.9288	-2.01792	0.0474964	0.999824	-3.93382
XRCC5	-0.136386	7.08458	-2.01743	0.0475487	0.999824	-3.95827
MALAT1	-0.339155	10.0884	-2.01712	0.0475822	0.999824	-4.04826
AC079174.2	-0.278282	0.336476	-2.01609	0.0476927	0.999824	-4.28295
ARRDC1-AS1	0.14856	3.2022	2.01597	0.0477055	0.999824	-3.98743
AL355816.2	0.304171	1.81777	2.01559	0.0477457	0.999824	-4.11736
NRXN2	0.747187	-1.9117	2.01539	0.0477679	0.999824	-4.4765
TVP23A	0.242124	1.21923	2.01532	0.0477745	0.999824	-4.18547
AC113410.5	-0.489444	-1.51288	-2.0153	0.0477775	0.999824	-4.44908
CSF3R	-0.307323	11.087	-2.01524	0.0477837	0.999824	-4.07941
AMPD3	-0.201292	4.80508	-2.01502	0.047807	0.999824	-3.929
PPP1R14B	0.21561	3.31001	2.01423	0.0478917	0.999824	-3.98196
LILRA1	-0.24198	6.07417	-2.01414	0.0479019	0.999824	-3.94035
DHX37	0.187722	3.80501	2.01373	0.0479459	0.999824	-3.95229
AC005280.3	-0.563649	0.789134	-2.01284	0.0480421	0.999824	-4.23911
ZNF18	-0.181896	3.55049	-2.01278	0.0480485	0.999824	-3.97113
TMEM71	-0.288817	6.0127	-2.01276	0.0480505	0.999824	-3.94054
DCTPP1	0.183702	3.02129	2.0125	0.0480786	0.999824	-4.00283
HLA-DPA1	0.258181	7.81466	2.01208	0.0481241	0.999824	-3.98297
HTATSF1P2	-1.36483	-1.56013	-2.0119	0.0481435	0.999824	-4.42631
SGSM3	0.143559	5.3124	2.011	0.048241	0.999824	-3.93415
KLHL6-AS1	0.739482	-2.17462	2.01076	0.048267	0.999824	-4.4724
KRT8P26	-0.777744	-2.66795	-2.01056	0.0482881	0.999824	-4.4951
AC139887.5	0.617671	-1.78451	2.01046	0.0482992	0.999824	-4.46593
WASIR2	-0.929375	-2.25353	-2.01037	0.0483093	0.999824	-4.47731
SERPINB1	-0.223809	6.86498	-2.01016	0.0483322	0.999824	-3.95922
DOCK5	-0.315115	6.87013	-2.01003	0.048346	0.999824	-3.96116
KLHL11	0.278507	1.97486	2.00899	0.0484587	0.999824	-4.08904
CCNF	0.213358	1.55839	2.00868	0.0484925	0.999824	-4.15745
AC007318.2	-0.827977	-2.61266	-2.0085	0.0485123	0.999824	-4.49966
AC069360.1	-0.269713	0.794334	-2.00783	0.048585	0.999824	-4.23684
DYSF	-0.441776	7.72039	-2.00769	0.0486006	0.999824	-3.98112
ADAM8	-0.295187	8.23942	-2.00732	0.0486407	0.999824	-3.99603
ADAM9	-0.252293	3.01407	-2.0069	0.0486861	0.999824	-4.00461
AL021707.6	-0.33204	1.75214	-2.00687	0.0486905	0.999824	-4.14553
NDUFA1	-0.442429	2.28487	-2.00609	0.0487756	0.999824	-4.09718
AC093821.1	0.53782	-2.01909	2.00509	0.0488849	0.999824	-4.47896
AL732372.2	-0.437339	5.45039	-2.00468	0.0489293	0.999824	-3.94061
SLC25A42	0.17539	3.64457	2.00457	0.0489411	0.999824	-3.96811
FCER2	0.446788	3.89999	2.00431	0.0489704	0.999824	-3.95181
GNA15	-0.267598	3.89006	-2.00178	0.0492478	0.999824	-3.96284
SBNO2	-0.275294	7.63716	-2.00156	0.0492725	0.999824	-3.98552
GRAMD1A	-0.226163	6.4926	-2.00133	0.0492976	0.999824	-3.96005
TAGLN2P1	-0.495193	-0.317801	-2.00129	0.0493024	0.999824	-4.35524
TRMT1	0.164645	4.52971	1.9995	0.0495	0.999824	-3.94797
PLIN5	-0.324422	3.9711	-1.99852	0.0496084	0.999824	-3.9648
AC009495.3	-0.449766	-0.957059	-1.99718	0.0497582	0.999824	-4.41909
NUBP2	0.133805	4.63673	1.99667	0.0498138	0.999824	-3.94969
AC239799.1	0.335083	0.246833	1.99632	0.0498529	0.999824	-4.29731
NPEPPS	-0.191812	6.4164	-1.9962	0.0498663	0.999824	-3.96419
RPL11P3	-0.499669	-0.469314	-1.99615	0.0498718	0.999824	-4.3724
HLA-DOB	0.383051	3.15887	1.99588	0.0499027	0.999824	-3.99202
RTN4	-0.196329	6.56984	-1.99581	0.0499098	0.999824	-3.96739
XRN2	-0.186318	6.26986	-1.99533	0.0499633	0.999824	-3.9621
AL359764.1	0.830582	-1.20264	1.99452	0.0500546	0.999824	-4.42897
HIST2H2BF	-0.493595	1.74486	-1.99394	0.0501193	0.999824	-4.14345
AC008764.3	-1.49183	-2.29952	-1.99381	0.0501334	0.999824	-4.51022
APMAP	-0.316193	7.22723	-1.99305	0.0502189	0.999824	-3.98247
ZNF230	-0.25338	2.82385	-1.99298	0.0502271	0.999824	-4.0301
ITGAX	-0.313306	8.7227	-1.99199	0.0503375	0.999824	-4.02094
PEAK1	0.196017	3.19553	1.99135	0.0504094	0.999824	-4.00217
LRRFIP2	-0.153984	4.56033	-1.99082	0.0504692	0.999824	-3.95478
AGTRAP	-0.252686	6.21719	-1.98961	0.0506052	0.999824	-3.96462
LRG1	-0.392823	6.3517	-1.98937	0.0506324	0.999824	-3.96712
PMEPA1	0.373438	1.6709	1.98808	0.0507786	0.999824	-4.12409
AC079250.1	0.495607	-1.18172	1.98805	0.0507815	0.999824	-4.43049
C19orf33	-0.968818	-1.72531	-1.98802	0.0507849	0.999824	-4.48438
LRRC37A15P	1.25484	-2.44423	1.98722	0.0508761	0.999824	-4.50723
RNF24	-0.31165	7.36387	-1.98705	0.0508955	0.999824	-3.99268
BTNL8	-0.424205	3.93775	-1.98672	0.0509325	0.999824	-3.9784
HIST2H2BD	-0.362294	3.02862	-1.98632	0.0509783	0.999824	-4.02651
C1QC	0.716101	-0.960046	1.9859	0.0510252	0.999824	-4.43587
IGKV3OR2-268	-1.3321	-2.29234	-1.98547	0.0510748	0.999824	-4.4874
SAV1	0.209492	2.48021	1.98535	0.0510884	0.999824	-4.04985
CELF4	0.779749	-2.23929	1.98523	0.0511019	0.999824	-4.49425
LINC01781	1.07276	-2.15928	1.98321	0.0513321	0.999824	-4.46516
GAS1RR	0.671878	-2.50031	1.98313	0.0513411	0.999824	-4.4995
ATG7	-0.18825	4.83888	-1.98304	0.0513515	0.999824	-3.96072
SIGLEC6	0.436931	0.902524	1.98302	0.0513538	0.999824	-4.22432
RPSAP9	1.01223	-2.7637	1.98285	0.0513729	0.999824	-4.52526
TMEM121B	-0.43433	3.3586	-1.98221	0.051446	0.999824	-4.00959
AC010680.3	-0.726973	-2.1321	-1.98183	0.0514897	0.999824	-4.48263
LINC01480	0.52537	-0.154637	1.98127	0.0515538	0.999824	-4.31527
MIA2	-0.13297	4.55586	-1.98095	0.0515909	0.999824	-3.96488
RAB43	-0.260256	6.11637	-1.98029	0.0516671	0.999824	-3.97236
CU639417.1	-0.717824	2.48669	-1.98021	0.051676	0.999824	-4.10661
RASGRP4	-0.303278	6.93491	-1.97825	0.0519017	0.999824	-3.98988
SPPL2B	0.156605	4.90124	1.9763	0.0521261	0.999824	-3.96719
ARHGAP27P1-BPTFP1-KPNA2P3	-0.216285	4.32244	-1.97542	0.0522287	0.999824	-3.97468
LINC02596	-0.818983	-1.83933	-1.97515	0.05226	0.999824	-4.48234
LRRC34	0.419859	0.0214742	1.97431	0.0523575	0.999824	-4.31985
BACE2	0.330115	2.18261	1.97412	0.0523791	0.999824	-4.09303
AP001266.2	-0.676868	-1.64684	-1.9734	0.052463	0.999824	-4.46702
ARPC2	-0.180702	8.20214	-1.97318	0.0524882	0.999824	-4.02363
AC117378.1	1.25551	-2.06357	1.97235	0.0525856	0.999824	-4.49913
NEK8	0.249856	2.5749	1.97183	0.0526466	0.999824	-4.06781
TSHZ3	-0.298587	3.02154	-1.96973	0.0528922	0.999824	-4.04108
TATDN1	0.313704	1.13122	1.96895	0.052983	0.999824	-4.22117
KIAA0232	-0.243213	5.72153	-1.9683	0.0530593	0.999824	-3.97969
LINC01270	-0.449442	2.78225	-1.96821	0.0530704	0.999824	-4.07452
AC016526.3	0.70999	-2.14278	1.96739	0.0531664	0.999824	-4.48604
PHAX	0.141435	3.71966	1.96729	0.053178	0.999824	-3.99987
MARCKS	-0.374991	6.78592	-1.96683	0.053233	0.999824	-3.99893
OSBPL10	0.489707	2.41111	1.96639	0.0532837	0.999824	-4.05836
AC099754.1	0.421793	-1.5385	1.96615	0.0533123	0.999824	-4.46258
CDKN2B-AS1	0.360445	0.572105	1.96586	0.0533474	0.999824	-4.27831
AC097658.1	0.367602	0.156296	1.96511	0.0534353	0.999824	-4.32745
MPZL3	-0.305801	5.89386	-1.96478	0.0534745	0.999824	-3.98495
RASSF7	0.200398	3.82227	1.96436	0.0535236	0.999824	-3.99999
PANK2	-0.153096	5.39725	-1.96419	0.0535444	0.999824	-3.97974
ZNF747	0.144282	2.89684	1.96354	0.0536209	0.999824	-4.05509
ETNK2	-0.528678	-0.824598	-1.96239	0.0537575	0.999824	-4.41835
PLAGL1	-0.246564	3.79124	-1.96198	0.0538064	0.999824	-4.00179
AC016737.1	-0.365215	-0.697881	-1.96126	0.0538917	0.999824	-4.4
SETD6	0.21255	2.68329	1.96064	0.0539658	0.999824	-4.07082
HMGB1P3	-0.733047	-0.391467	-1.96022	0.0540158	0.999824	-4.37798
AC110611.1	-0.225368	0.151364	-1.96022	0.0540166	0.999824	-4.32043
N4BP1	-0.263851	6.30856	-1.95988	0.0540569	0.999824	-3.99617
AC117464.1	0.443963	-1.48906	1.95959	0.0540914	0.999824	-4.45962
TAF12	-0.162646	3.71717	-1.95924	0.0541327	0.999824	-4.01098
AC104763.1	-0.740813	-2.33701	-1.95914	0.0541448	0.999824	-4.49605
AC108025.1	-0.618864	-2.03491	-1.95776	0.05431	0.999824	-4.49416
DSN1	0.137065	2.54511	1.95538	0.0545958	0.999824	-4.08761
DNAJC3	-0.272647	5.54393	-1.95453	0.0546991	0.999824	-3.99084
PACSIN2	-0.283944	6.79209	-1.95384	0.0547818	0.999824	-4.01062
C1orf159	0.177872	2.60012	1.9538	0.0547869	0.999824	-4.08628
MIR22HG	-0.237994	2.3772	-1.95375	0.0547929	0.999824	-4.10489
Z99916.3	0.726202	-2.41446	1.95372	0.0547969	0.999824	-4.49283
ADGRE2	-0.354916	6.76175	-1.95358	0.0548138	0.999824	-4.01087
HINFP	0.10863	4.07271	1.95308	0.0548742	0.999824	-4.00185
PLBD1-AS1	-0.327733	1.78724	-1.95297	0.0548876	0.999824	-4.15737
MOGS	0.126364	4.9997	1.95271	0.0549178	0.999824	-3.9899
NCKAP5L	-0.189087	4.01792	-1.95246	0.0549483	0.999824	-4.00421
CFLAR	-0.246448	8.59049	-1.9523	0.0549679	0.999824	-4.05346
AC087533.1	0.610844	-1.66741	1.95168	0.0550431	0.999824	-4.47215
NFIB	0.79518	-1.86662	1.95153	0.055061	0.999824	-4.49532
GEMIN6	0.194261	2.4746	1.95145	0.0550708	0.999824	-4.09998
GCA	-0.366579	7.94911	-1.95134	0.0550845	0.999824	-4.03882
SULT1B1	-0.376339	5.69701	-1.95116	0.0551059	0.999824	-3.9957
PPIF	-0.241381	5.3559	-1.95079	0.0551506	0.999824	-3.99224
PLB1	-0.452527	3.88645	-1.9505	0.0551858	0.999824	-4.01288
LRRC6	-0.506624	2.08869	-1.95037	0.0552017	0.999824	-4.14821
AC068446.1	-0.882472	-2.90112	-1.95014	0.0552305	0.999824	-4.52327
LINC02217	-0.573923	-1.10868	-1.94927	0.0553366	0.999824	-4.42318
MMP25-AS1	-0.357052	7.04441	-1.94879	0.0553941	0.999824	-4.01877
PIK3C3	-0.121432	4.73823	-1.94802	0.0554888	0.999824	-3.99494
AC215522.2	-0.429907	2.41145	-1.948	0.0554903	0.999824	-4.09914
SLC36A1	-0.276878	4.43787	-1.94708	0.055603	0.999824	-3.99898
MIR646HG	-0.257339	2.83609	-1.94697	0.0556168	0.999824	-4.0765
NCF2	-0.30033	9.36727	-1.94646	0.0556785	0.999824	-4.0775
FIP1L1	-0.130149	4.3305	-1.94637	0.0556898	0.999824	-4.00169
EAF1-AS1	0.499571	-0.948463	1.94586	0.0557523	0.999824	-4.43099
NFKBIZ	-0.281663	5.05968	-1.94546	0.0558019	0.999824	-3.9968
LGALSL-DT	-0.52398	0.830692	-1.94513	0.0558424	0.999824	-4.29222
RAB39A	0.500151	-1.12464	1.94503	0.055855	0.999824	-4.42887
DGAT2	-0.363279	6.70019	-1.94473	0.0558915	0.999824	-4.01606
ARHGAP19	-0.205756	4.66122	-1.94463	0.0559033	0.999824	-3.9984
TIMD4	-0.785138	-2.46093	-1.94372	0.056015	0.999824	-4.50385
NIPAL4	0.59056	-1.22795	1.94371	0.0560167	0.999824	-4.41697
AL136295.17	-1.55607	-3.87209	-1.94193	0.0562361	0.999824	-4.55223
CKAP4	-0.316329	5.60519	-1.94161	0.056275	0.999824	-4.00314
AC133552.1	0.505586	-1.67748	1.94092	0.0563612	0.999824	-4.46881
CCDC183	0.43216	-0.84288	1.94068	0.0563906	0.999824	-4.40892
KIF13A	-0.310731	5.03238	-1.94047	0.0564161	0.999824	-4.0014
IGKV6-21	0.954939	-2.02196	1.93997	0.0564779	0.999824	-4.49123
NUP43	0.155049	4.31206	1.93987	0.0564912	0.999824	-4.00849
BAZ1A	-0.224019	6.67079	-1.93971	0.056511	0.999824	-4.02135
VWA7	-0.385243	0.218865	-1.93934	0.0565564	0.999824	-4.32726
ZBTB8B	0.395876	1.13897	1.93821	0.0566964	0.999824	-4.23502
AC108718.1	-0.679228	-2.15811	-1.93741	0.0567964	0.999824	-4.48954
C12orf57	0.292824	4.37842	1.93632	0.0569323	0.999824	-4.01191
FP236241.1	0.685829	-1.62394	1.93624	0.0569424	0.999824	-4.47017
TRIM8	-0.197579	6.59403	-1.9361	0.0569598	0.999824	-4.02272
BICD1	0.279387	1.41627	1.93562	0.0570196	0.999824	-4.1958
RASSF2	-0.270802	8.72971	-1.93559	0.0570232	0.999824	-4.0707
BLK	0.446495	4.46761	1.93558	0.0570244	0.999824	-4.00795
IGSF6	-0.247281	7.29223	-1.93539	0.0570487	0.999824	-4.03727
AC010247.2	0.271292	1.47989	1.93473	0.0571309	0.999824	-4.19254
AC093249.6	0.398093	-1.09821	1.93413	0.0572066	0.999824	-4.41909
AF111169.1	1.03874	-0.713695	1.93402	0.0572204	0.999824	-4.43663
AL450326.3	-0.685191	-2.02861	-1.93304	0.0573424	0.999824	-4.48529
RASL10A	-0.691309	-2.50678	-1.93275	0.0573794	0.999824	-4.50615
STON2	0.346146	0.207797	1.93216	0.0574539	0.999824	-4.33557
NEUROD2	0.681885	2.16562	1.93208	0.0574638	0.999824	-4.16175
IMPDH1P10	-0.71199	0.999281	-1.9314	0.0575494	0.999824	-4.25663
USE1	0.183351	3.15408	1.93068	0.0576399	0.999824	-4.06388
ARSG	-0.142692	4.33151	-1.93064	0.057645	0.999824	-4.01699
LINC01146	-0.326348	-0.0309901	-1.93061	0.0576486	0.999824	-4.3553
KLHL2	-0.354019	4.84299	-1.93019	0.0577018	0.999824	-4.01149
CYP4F3	-0.347525	7.09023	-1.93012	0.0577102	0.999824	-4.03723
AL646090.2	0.477837	-1.55987	1.93011	0.0577118	0.999824	-4.46993
C4orf19	-0.41841	-0.0338585	-1.93003	0.0577215	0.999824	-4.35709
BANK1	0.362903	4.55499	1.92985	0.0577444	0.999824	-4.01257
SLC25A35	0.188472	1.83493	1.92976	0.0577558	0.999824	-4.17415
SIVA1	0.147968	4.21415	1.92907	0.0578431	0.999824	-4.02123
CEMP1	-1.47201	-0.862541	-1.92905	0.0578461	0.999824	-4.45232
RTEL1	0.171343	3.16335	1.92874	0.0578844	0.999824	-4.06527
OSTF1	-0.219145	6.81933	-1.92866	0.0578944	0.999824	-4.03312
AP001453.3	0.463129	1.25567	1.928	0.0579778	0.999824	-4.23167
AC073174.1	-0.636726	-1.65595	-1.92791	0.0579899	0.999824	-4.47535
LINC02649	-0.409852	1.37538	-1.92679	0.0581319	0.999824	-4.21652
SLC6A6	-0.282181	8.08446	-1.92674	0.0581379	0.999824	-4.0626
PICALM	-0.24198	7.68658	-1.92569	0.058272	0.999824	-4.05529
FPGS	0.157704	4.17411	1.92488	0.0583745	0.999824	-4.02589
CDK10	0.164018	4.77918	1.92477	0.0583888	0.999824	-4.0177
PTTG1IP	-0.183009	6.75781	-1.92462	0.0584076	0.999824	-4.03646
LIN7A	-0.342383	4.37163	-1.92403	0.0584828	0.999824	-4.02129
IQCD	-0.656929	-2.21705	-1.92341	0.0585627	0.999824	-4.49671
PPP1R3D	-0.23394	4.29051	-1.9226	0.0586658	0.999824	-4.02404
SEMA5A	0.493325	-0.706922	1.92231	0.0587037	0.999824	-4.42075
CR1	-0.340629	6.10513	-1.92228	0.0587076	0.999824	-4.02874
AL499604.1	-0.570495	-2.30861	-1.92156	0.0587998	0.999824	-4.49806
FBXL6	0.154741	3.49383	1.92151	0.0588051	0.999824	-4.05278
PRKCD	-0.27361	7.34229	-1.92115	0.0588515	0.999824	-4.05089
PLPP5	0.263023	3.59641	1.91996	0.0590046	0.999824	-4.04156
AL358113.1	0.486141	0.259063	1.91991	0.0590111	0.999824	-4.34019
AC109446.3	0.749231	-2.44885	1.91989	0.0590138	0.999824	-4.49896
FAM200B	-0.20295	3.41291	-1.91959	0.0590527	0.999824	-4.05631
LDHB	-0.309641	6.71364	-1.91897	0.0591316	0.999824	-4.03829
TGM3	-0.570245	2.35382	-1.91781	0.0592816	0.999824	-4.13993
HCG25	0.182734	2.06523	1.91781	0.0592819	0.999824	-4.16043
SOGA1	0.241215	2.63706	1.91676	0.0594177	0.999824	-4.10106
CLEC6A	-0.783505	-1.51396	-1.91663	0.0594341	0.999824	-4.45009
Z94721.1	-0.481484	-1.51892	-1.91648	0.0594536	0.999824	-4.45772
L2HGDH	0.262637	1.70309	1.91572	0.0595525	0.999824	-4.18774
CNR2	0.312941	3.45903	1.91535	0.0596003	0.999824	-4.05129
MCRIP2	0.173546	2.97786	1.9153	0.0596069	0.999824	-4.0888
ATP8B1	0.290575	0.397861	1.91431	0.0597357	0.999824	-4.30617
EHD4-AS1	-0.64808	-2.02434	-1.91425	0.0597434	0.999824	-4.49413
ST3GAL4	-0.304212	4.28667	-1.91397	0.0597791	0.999824	-4.03327
NUDT17	0.253159	0.565778	1.91378	0.0598045	0.999824	-4.30751
OMG	-0.461337	0.165301	-1.91354	0.0598357	0.999824	-4.34302
MBD6	-0.235148	6.48128	-1.91324	0.0598744	0.999824	-4.04178
AC010642.2	-0.1859	3.17666	-1.91311	0.0598912	0.999824	-4.07666
AC008269.1	0.652961	-2.11682	1.9126	0.0599576	0.999824	-4.49802
AC124319.3	0.393146	0.574037	1.91249	0.0599717	0.999824	-4.31311
AHCTF1	-0.26138	5.73999	-1.9124	0.0599841	0.999824	-4.03302
AC063977.6	-0.609943	-1.08249	-1.91225	0.0600028	0.999824	-4.44345
AC007298.1	-0.537659	-1.66798	-1.91201	0.0600348	0.999824	-4.4687
PPP1R12B	-0.283523	5.72939	-1.91194	0.060044	0.999824	-4.03263
AL591686.2	-0.638408	-2.05966	-1.91054	0.0602264	0.999824	-4.49589
ANPEP	-0.405502	7.59391	-1.90972	0.060334	0.999824	-4.06492
CPNE5	0.320771	3.78455	1.90957	0.0603544	0.999824	-4.04822
ZNF618	0.312025	0.813235	1.90874	0.0604633	0.999824	-4.27013
NSRP1	-0.140346	4.21759	-1.9079	0.0605729	0.999824	-4.04189
AL391832.3	-0.698312	-2.62912	-1.90789	0.0605744	0.999824	-4.51494
RXRA	-0.259037	7.73209	-1.90757	0.0606163	0.999824	-4.0704
NKD1	-0.276077	1.86694	-1.90743	0.0606353	0.999824	-4.19596
SLC35A3	0.206973	3.41424	1.90735	0.0606457	0.999824	-4.06477
NFKB1	-0.191245	5.99059	-1.90714	0.0606732	0.999824	-4.04061
MRPS24	0.184574	3.18132	1.90651	0.0607567	0.999824	-4.08359
CXCL1	-0.346727	2.05282	-1.9061	0.0608107	0.999824	-4.17178
PARD3B	0.871811	-2.64574	1.90574	0.0608578	0.999824	-4.52053
LLCFC1	-0.836313	-1.48347	-1.90526	0.0609213	0.999824	-4.47877
PSEN1	-0.209171	6.29923	-1.90524	0.0609233	0.999824	-4.04615
ADD2	0.305655	2.68594	1.90471	0.0609935	0.999824	-4.11283
TVP23C	-0.221608	1.40756	-1.90453	0.0610171	0.999824	-4.2253
ARHGAP26	-0.274924	6.76687	-1.90441	0.0610335	0.999824	-4.05574
KIF1B	-0.223084	4.72151	-1.90406	0.0610799	0.999824	-4.0371
MAEA	-0.189195	6.11241	-1.90398	0.0610899	0.999824	-4.04484
RNF213-AS1	0.33549	1.98468	1.90395	0.0610947	0.999824	-4.17821
SGO1	0.314128	-0.122615	1.90389	0.0611022	0.999824	-4.36199
PHF21A	-0.21129	6.29115	-1.90385	0.0611073	0.999824	-4.04797
PPIAP29	-0.763261	-1.28129	-1.90291	0.0612319	0.999824	-4.45948
BHLHE41	0.399898	0.302921	1.90244	0.0612946	0.999824	-4.31902
AIP	0.133856	5.78159	1.90199	0.0613546	0.999824	-4.04247
BCAS4	0.248837	3.38804	1.90171	0.061392	0.999824	-4.07068
DHRS11	0.30368	0.446294	1.90067	0.0615301	0.999824	-4.32468
AC022497.1	-0.24625	0.778841	-1.90043	0.0615619	0.999824	-4.28649
METTL8	0.28795	3.00771	1.89989	0.0616342	0.999824	-4.09021
AC004997.1	-1.28915	-1.27326	-1.89985	0.0616392	0.999824	-4.44534
AC092053.3	-0.614574	-1.98428	-1.89954	0.0616816	0.999824	-4.484
PLXNC1	-0.336516	7.57669	-1.89888	0.0617691	0.999824	-4.07707
SOCS3	-0.359919	4.86807	-1.89879	0.0617812	0.999824	-4.04151
ATP6V1B2	-0.268862	8.31409	-1.8987	0.0617937	0.999824	-4.09071
F13A1	-0.400235	6.08108	-1.89814	0.0618684	0.999824	-4.0474
CACNA1E	-0.430931	1.82207	-1.89803	0.0618831	0.999824	-4.21184
AC007192.2	-1.0463	0.762638	-1.89787	0.0619048	0.999824	-4.31592
AP5B1	-0.249627	7.19909	-1.89744	0.0619615	0.999824	-4.0682
SH2D3A	0.151474	3.653	1.8972	0.0619941	0.999824	-4.06681
NTNG2	-0.309242	5.21395	-1.89695	0.0620277	0.999824	-4.04279
SH3GLB1	-0.227354	6.35637	-1.89687	0.0620387	0.999824	-4.05495
CMC4	-0.35176	0.757888	-1.8964	0.062102	0.999824	-4.29643
FAM86DP	0.266488	1.02443	1.89581	0.062181	0.999824	-4.27969
AC005622.1	-0.715232	-1.16606	-1.89561	0.0622082	0.999824	-4.45879
RASSF8	0.667061	-2.14097	1.89555	0.0622154	0.999824	-4.49637
ZFP36	-0.224355	7.18834	-1.89552	0.0622194	0.999824	-4.07085
AC027688.2	0.772589	-2.39404	1.89549	0.0622233	0.999824	-4.51641
TNFRSF1A	-0.272676	7.85229	-1.89543	0.0622323	0.999824	-4.08329
MXD1	-0.334058	8.7091	-1.89528	0.0622514	0.999824	-4.10276
FAM177A1	-0.144452	3.89805	-1.89501	0.0622883	0.999824	-4.06068
GTF2IP13	-0.288863	3.95904	-1.8945	0.0623569	0.999824	-4.06107
SERHL2	0.306863	0.625942	1.89383	0.0624476	0.999824	-4.29903
HEXD	0.12833	5.06495	1.89303	0.0625557	0.999824	-4.0467
GPX2	-0.559601	-1.76815	-1.89268	0.0626025	0.999824	-4.47511
HNRNPA1P52	-0.541968	-1.41056	-1.89248	0.0626299	0.999824	-4.46562
RHPN2	0.383257	-0.964196	1.89232	0.0626516	0.999824	-4.43699
LINC02541	0.759907	-2.30484	1.89146	0.0627682	0.999824	-4.48642
BASP1	-0.421546	8.17967	-1.89107	0.0628203	0.999824	-4.09448
AL390066.1	-0.299277	1.29111	-1.88984	0.0629877	0.999824	-4.24925
NOB1	0.162393	4.05007	1.8883	0.0631973	0.999824	-4.06295
SPATA20P1	-0.814268	-2.86775	-1.888	0.0632383	0.999824	-4.52532
LYPD1	-0.631705	-2.00351	-1.88784	0.06326	0.999824	-4.49519
HSDL2	-0.260822	4.93043	-1.8874	0.0633195	0.999824	-4.05181
GINS3	0.277005	0.521788	1.88688	0.0633907	0.999824	-4.32366
AL132709.8	-0.453379	-1.27192	-1.88652	0.0634402	0.999824	-4.4708
OSBPL9	-0.132962	5.06516	-1.88598	0.0635149	0.999824	-4.05309
AC093495.1	-0.275194	3.21076	-1.88588	0.0635286	0.999824	-4.09745
C22orf23	0.361974	0.522779	1.88544	0.0635883	0.999824	-4.31043
PPP4R1L	-0.241196	3.43338	-1.88541	0.0635917	0.999824	-4.08484
ARHGAP44	0.428082	-0.0623701	1.88537	0.0635975	0.999824	-4.36558
HSFX1	-1.57827	-1.72494	-1.88523	0.0636164	0.999824	-4.47879
AC079921.2	-0.719651	-2.79007	-1.88504	0.0636428	0.999824	-4.51744
S100A11	-0.354352	8.34107	-1.88476	0.0636809	0.999824	-4.10113
RIT1	-0.205752	5.14906	-1.88453	0.0637126	0.999824	-4.05457
SUMO1P1	-0.709655	-2.39157	-1.88377	0.063818	0.999824	-4.50489
TRPM6	-0.338017	3.53234	-1.88359	0.0638425	0.999824	-4.08371
AC137932.3	-0.219686	1.39987	-1.88346	0.0638595	0.999824	-4.24443
WBP2NL	0.295008	0.0764655	1.88134	0.0641521	0.999824	-4.36673
MCMBP	-0.1626	5.58392	-1.88069	0.064242	0.999824	-4.06068
AC005393.1	-0.599214	-2.4187	-1.88009	0.0643242	0.999824	-4.50956
HSPA6	-0.315574	7.09805	-1.87976	0.0643704	0.999824	-4.08068
ZNF492	0.493238	-0.993078	1.87913	0.0644574	0.999824	-4.43551
AL109918.1	0.748207	-2.73682	1.87902	0.0644726	0.999824	-4.51534
CEP63	-0.231749	5.33809	-1.87836	0.064565	0.999824	-4.06099
CFAP410	0.190158	4.23197	1.87808	0.0646037	0.999824	-4.06793
TMSB4X	-0.164573	10.8082	-1.87781	0.0646412	0.999824	-4.16698
SPIB	0.374434	4.17729	1.87778	0.0646449	0.999824	-4.06514
AC012414.5	-0.904011	-2.08671	-1.8775	0.064684	0.999824	-4.49441
AC015813.1	-0.182717	3.61111	-1.87714	0.0647347	0.999824	-4.0871
PPT1	-0.250634	7.5399	-1.87682	0.0647792	0.999824	-4.09273
PAFAH1B3	0.195436	2.52274	1.87673	0.0647908	0.999824	-4.15435
FASTK	0.139859	5.08777	1.87666	0.0648006	0.999824	-4.06204
AC015674.1	-0.273363	1.48394	-1.87613	0.0648745	0.999824	-4.25036
AC012443.2	-0.564141	-1.90103	-1.87599	0.0648943	0.999824	-4.49409
AC135012.1	0.592949	-1.48469	1.87592	0.0649037	0.999824	-4.46635
EFHB	-0.835959	-2.46805	-1.87584	0.0649147	0.999824	-4.52341
ST6GAL2	0.512894	-1.50659	1.8758	0.0649201	0.999824	-4.47757
SPACA7	-0.62238	-1.96433	-1.87576	0.0649265	0.999824	-4.49349
AC114744.1	-0.395679	0.0555017	-1.87572	0.0649319	0.999824	-4.35203
NT5C2	-0.212377	6.38728	-1.87565	0.0649415	0.999824	-4.07467
SGTB	-0.210581	4.03796	-1.87469	0.0650757	0.999824	-4.07302
KIAA0319	-0.415929	1.64779	-1.87467	0.065079	0.999824	-4.23138
EFCAB8	-0.328239	-0.366713	-1.87462	0.065086	0.999824	-4.40937
C1QB	0.701171	0.20103	1.87447	0.0651067	0.999824	-4.3669
DECR1	-0.143034	5.38726	-1.87436	0.0651218	0.999824	-4.06499
FKBP9	-0.300602	1.61336	-1.87395	0.065179	0.999824	-4.22839
Z82180.1	0.525941	-1.94052	1.87394	0.0651799	0.999824	-4.49134
GPT2	0.380726	0.863452	1.87377	0.0652046	0.999824	-4.28952
FAM157C	-0.392375	5.63512	-1.87359	0.06523	0.999824	-4.06698
AC073172.1	-0.801719	-0.675143	-1.87313	0.0652942	0.999824	-4.43579
RNF19B	-0.283798	6.40067	-1.87174	0.0654886	0.999824	-4.07826
TRIM13	0.153755	4.1738	1.87166	0.0654997	0.999824	-4.07309
SLC5A5	0.334651	0.0499763	1.87155	0.0655162	0.999824	-4.37824
CHEK2	0.25035	1.89826	1.87111	0.0655776	0.999824	-4.19971
TAS2R40	-0.709261	-1.37978	-1.87091	0.0656056	0.999824	-4.4641
GTF2IP7	0.404707	-0.642061	1.86988	0.0657505	0.999824	-4.41835
ITGAM	-0.247801	7.23499	-1.86962	0.0657879	0.999824	-4.09385
MICALL1	0.15039	4.06561	1.8686	0.0659318	0.999824	-4.0792
IMPG2	-0.380213	-0.997704	-1.8682	0.0659879	0.999824	-4.44335
AP001486.2	-1.14482	-1.7974	-1.86787	0.0660346	0.999824	-4.48964
CNOT9	0.107995	4.64342	1.86767	0.0660623	0.999824	-4.07143
AL928654.2	1.43869	-1.69606	1.86725	0.0661217	0.999824	-4.50479
KCNJ15	-0.347235	7.00174	-1.86674	0.0661947	0.999824	-4.09106
AL022344.1	-0.608898	-1.12414	-1.86609	0.0662868	0.999824	-4.46517
NXPH4	0.75842	-1.16584	1.86597	0.0663039	0.999824	-4.41471
BLNK	0.332001	2.80716	1.86566	0.0663475	0.999824	-4.12141
AL121928.1	-1.18548	-3.31944	-1.86562	0.0663529	0.999824	-4.54546
AL109811.1	-0.804796	-0.23535	-1.86511	0.0664251	0.999824	-4.4027
ZDHHC7	-0.148635	6.35588	-1.86417	0.0665593	0.999824	-4.08445
LINC02680	0.383368	0.0156357	1.86393	0.0665941	0.999824	-4.38227
HTATIP2	-0.179057	4.75477	-1.86298	0.0667293	0.999824	-4.0757
AC008494.3	-0.506204	-2.32145	-1.86242	0.0668084	0.999824	-4.51794
UBE2A	-0.129192	4.79209	-1.86047	0.0670883	0.999824	-4.07728
AP003307.1	-0.782883	-1.99294	-1.86019	0.0671281	0.999824	-4.50665
SNX22	0.276947	3.68605	1.86014	0.0671357	0.999824	-4.09207
CAMP	-0.642233	2.72835	-1.85947	0.067231	0.999824	-4.16999
DSTNP2	0.211796	1.10492	1.85919	0.0672724	0.999824	-4.27703
AC006435.1	-1.30934	-1.13892	-1.85915	0.0672777	0.999824	-4.46925
AC103691.1	-0.202267	3.58052	-1.85821	0.0674132	0.999824	-4.10376
AFTPH	-0.125037	5.59512	-1.85768	0.0674896	0.999824	-4.08217
UBXN2B	-0.259054	5.65295	-1.85765	0.0674936	0.999824	-4.08219
TRBV5-4	-0.324028	0.689044	-1.85701	0.067586	0.999824	-4.32192
KREMEN1	-0.559239	5.11024	-1.85687	0.0676051	0.999824	-4.08042
AL513166.1	1.20166	-3.05731	1.85647	0.0676641	0.999824	-4.54235
AL596247.1	0.639665	-2.36298	1.85629	0.0676899	0.999824	-4.51354
CMTM2	-0.37823	4.82248	-1.85624	0.0676963	0.999824	-4.08179
UBE2T	0.523081	-1.06889	1.85541	0.0678172	0.999824	-4.45136
GBE1	-0.195272	3.32765	-1.85528	0.0678353	0.999824	-4.11719
KF459542.1	1.33403	-3.96561	1.85405	0.0680136	0.999824	-4.55257
NHSL2	-0.242941	6.47045	-1.85328	0.0681247	0.999824	-4.09643
FAM184B	0.552382	-1.09657	1.85305	0.0681592	0.999824	-4.45855
OSM	-0.322781	1.72775	-1.8526	0.0682234	0.999824	-4.23554
ELF2	-0.199457	4.94549	-1.85246	0.0682442	0.999824	-4.08423
LRP2BP	0.347233	-0.0653033	1.85211	0.0682952	0.999824	-4.3718
RN7SL172P	-0.555924	-2.06826	-1.85206	0.0683032	0.999824	-4.4996
MYBPC3	-0.334471	2.54677	-1.85202	0.0683081	0.999824	-4.16796
CXXC1	0.12401	5.30874	1.85162	0.0683664	0.999824	-4.08574
MOXD1	0.570965	-1.42481	1.85152	0.0683816	0.999824	-4.45136
ENAH	0.488706	-0.284026	1.85137	0.0684033	0.999824	-4.39719
NFAM1	-0.295398	8.71421	-1.8512	0.0684279	0.999824	-4.1371
PNO1	0.132413	2.41543	1.85108	0.068445	0.999824	-4.17646
RNF149	-0.279134	8.22216	-1.85097	0.0684621	0.999824	-4.12802
TOR1A	-0.138928	4.73052	-1.8509	0.0684723	0.999824	-4.08663
LRRFIP1	-0.189891	7.81775	-1.85029	0.0685606	0.999824	-4.12208
SIT1	0.208715	4.64625	1.85016	0.0685801	0.999824	-4.08824
DENND3	-0.275041	7.81692	-1.8499	0.0686179	0.999824	-4.12133
ANXA2	-0.217174	7.25065	-1.84958	0.0686643	0.999824	-4.11131
BMS1P10	-0.741446	-1.692	-1.8489	0.0687639	0.999824	-4.48425
C21orf59-TCP10L	-1.68575	-3.15319	-1.84863	0.0688039	0.999824	-4.54741
AC004967.1	0.631702	-2.09785	1.84859	0.0688087	0.999824	-4.51141
RAB11FIP3	0.158792	4.0484	1.84748	0.0689715	0.999824	-4.09811
CSRNP1	-0.221489	4.68845	-1.8473	0.0689983	0.999824	-4.08994
PTPRCAP	0.221089	6.87358	1.84701	0.0690413	0.999824	-4.10753
IFRD1	-0.293272	5.26209	-1.8469	0.069057	0.999824	-4.08994
FGF5	0.626035	-1.93605	1.84641	0.069129	0.999824	-4.49961
AL354877.1	-0.494243	-1.05353	-1.84618	0.0691631	0.999824	-4.44687
P2RY13	-0.239781	7.09261	-1.84593	0.0692	0.999824	-4.11216
MSTO2P	0.319855	1.11464	1.84581	0.0692175	0.999824	-4.27895
TPSAB1	-1.10967	-3.19784	-1.84579	0.0692207	0.999824	-4.54149
AC116353.6	-0.3185	0.741715	-1.84538	0.0692798	0.999824	-4.33007
AL162377.1	-0.262193	0.99173	-1.84474	0.0693747	0.999824	-4.30108
AC010886.1	0.52718	-2.04262	1.84468	0.0693844	0.999824	-4.50034
NUMB	-0.276054	7.29853	-1.84404	0.0694786	0.999824	-4.11751
LILRA6	-0.371342	5.92434	-1.84384	0.0695072	0.999824	-4.09639
ZMAT2	-0.270976	5.31329	-1.84344	0.0695661	0.999824	-4.09281
FAM219A	-0.13278	3.78217	-1.84321	0.0696013	0.999824	-4.11012
RPL32P29	-0.628152	-0.331079	-1.84312	0.0696138	0.999824	-4.41574
AP005264.7	0.509204	-1.50439	1.84286	0.0696518	0.999824	-4.47453
UBA6-AS1	0.197427	2.49198	1.84239	0.0697221	0.999824	-4.16902
SLC9B2	0.204665	1.83057	1.84231	0.0697337	0.999824	-4.22318
ZBTB2	-0.154169	3.54818	-1.84229	0.0697373	0.999824	-4.11553
AL391666.1	0.531587	-1.94869	1.84202	0.0697774	0.999824	-4.50237
CD79A	0.406367	6.10676	1.84192	0.0697915	0.999824	-4.10579
MANSC1	-0.359675	4.8011	-1.84163	0.069834	0.999824	-4.09478
AC020741.1	0.658201	-2.47804	1.84132	0.069881	0.999824	-4.52347
RNASEH2B	0.171301	4.43184	1.84021	0.0700452	0.999824	-4.09867
ZNF564	-0.167543	2.87722	-1.8399	0.0700908	0.999824	-4.15411
USP4	-0.16679	6.73414	-1.83923	0.070191	0.999824	-4.11233
AC092296.2	0.646235	-1.03007	1.83921	0.070194	0.999824	-4.46005
IPCEF1	-0.173813	4.93095	-1.83906	0.0702167	0.999824	-4.09658
NECAB2	-0.46751	1.879	-1.83832	0.0703264	0.999824	-4.22572
FAM49B	-0.199304	7.11359	-1.83826	0.0703352	0.999824	-4.11874
AC012467.2	0.213624	0.775839	1.83782	0.0704007	0.999824	-4.3126
PGS1	-0.222084	6.06848	-1.83717	0.0704981	0.999824	-4.10484
SLC11A1	-0.331859	7.98696	-1.83657	0.0705876	0.999824	-4.13461
NSUN4	0.14403	3.39006	1.83656	0.0705893	0.999824	-4.1302
MICAL3	0.268116	3.24613	1.83646	0.070604	0.999824	-4.12677
AC110011.1	-0.599241	-1.77041	-1.8357	0.0707184	0.999824	-4.49679
LRRC45	0.15719	3.29444	1.83546	0.0707545	0.999824	-4.13545
ACOX1	-0.26694	6.34633	-1.83532	0.070776	0.999824	-4.10944
DDN-AS1	-0.544841	-1.97954	-1.83483	0.0708495	0.999824	-4.50276
AC090515.2	-0.493047	-0.846891	-1.83434	0.0709225	0.999824	-4.44431
AL391988.1	-0.501457	-0.873624	-1.83414	0.0709524	0.999824	-4.45234
USP32	-0.238936	6.21373	-1.8339	0.0709886	0.999824	-4.11054
VIM	-0.208871	9.69107	-1.83384	0.0709971	0.999824	-4.17175
CRIP3	0.331588	0.843984	1.83375	0.0710117	0.999824	-4.30351
C11orf71	-0.177783	1.58195	-1.83361	0.0710328	0.999824	-4.25598
RABIF	-0.126623	3.46344	-1.83294	0.0711328	0.999824	-4.12966
AC015871.4	-0.232509	4.06661	-1.83289	0.0711403	0.999824	-4.11132
NBR1	-0.180114	6.6592	-1.83282	0.0711508	0.999824	-4.11712
BTBD10	-0.223233	3.73239	-1.83246	0.0712053	0.999824	-4.1204
BANF1	0.154708	5.14053	1.83245	0.0712074	0.999824	-4.1029
AC131392.1	0.62078	-0.454772	1.83186	0.0712964	0.999824	-4.41862
AC009095.1	1.15064	-2.74086	1.83156	0.0713415	0.999824	-4.52608
NMNAT1	-0.143621	3.36685	-1.8308	0.0714553	0.999824	-4.13585
DHRS7	-0.20571	6.28932	-1.82996	0.0715835	0.999824	-4.11321
AC126121.3	0.645085	-2.21502	1.82977	0.0716109	0.999824	-4.51002
PIGF	-0.230333	2.32816	-1.82935	0.0716747	0.999824	-4.19014
CPAMD8	-0.24053	2.34551	-1.82929	0.0716845	0.999824	-4.19158
CSNK1G2-AS1	-0.474968	-0.889612	-1.82917	0.0717024	0.999824	-4.44233
KYAT1	0.190383	2.10634	1.82907	0.0717178	0.999824	-4.21022
SLC25A45	0.152465	4.62083	1.82845	0.0718119	0.999824	-4.10826
GOLGA2P10	0.487434	0.621092	1.82837	0.0718234	0.999824	-4.32825
AC004982.2	0.453331	-0.895186	1.82808	0.0718681	0.999824	-4.43857
ZNF586	-0.154465	4.10825	-1.828	0.0718807	0.999824	-4.11529
AC011498.4	-0.359953	0.838702	-1.82737	0.0719763	0.999824	-4.3195
NEK6	-0.237354	3.86135	-1.82734	0.0719796	0.999824	-4.11852
HAUS4	-0.251628	4.77027	-1.82717	0.0720064	0.999824	-4.10806
LINC02846	-0.371104	-1.1792	-1.82708	0.07202	0.999824	-4.46259
MAP2K4	-0.210125	4.83104	-1.82702	0.0720283	0.999824	-4.1078
CSNK1E	0.148363	4.29363	1.82683	0.0720581	0.999824	-4.1127
TM9SF4	-0.140638	5.3807	-1.82633	0.0721347	0.999824	-4.10927
AC106028.4	-0.597256	-2.24066	-1.82624	0.0721474	0.999824	-4.51646
PRMT7	0.153711	3.97595	1.82612	0.0721667	0.999824	-4.11962
DEGS1	-0.140491	4.97809	-1.82573	0.0722258	0.999824	-4.10875
AL356124.1	0.517942	-1.47261	1.82533	0.0722872	0.999824	-4.4852
PXN	-0.23003	8.4806	-1.82524	0.0723006	0.999824	-4.15291
LAMP2	-0.235484	7.13136	-1.82508	0.072324	0.999824	-4.1309
NABP2	0.155091	2.78895	1.82501	0.0723347	0.999824	-4.16933
SPOUT1	0.133216	4.373	1.8249	0.072352	0.999824	-4.11381
CDK4	0.15273	3.90366	1.82489	0.0723535	0.999824	-4.12237
VAMP3	-0.152003	5.50589	-1.82478	0.0723707	0.999824	-4.11115
DNLZ	0.352103	0.102872	1.82356	0.0725569	0.999824	-4.38564
RAI2	-0.753029	-1.65278	-1.82351	0.0725651	0.999824	-4.49793
CCDC47	-0.143601	4.58612	-1.82336	0.072588	0.999824	-4.11196
FAM124B	-0.32557	-0.65584	-1.82278	0.0726764	0.999824	-4.43403
CASP1	-0.220135	6.73002	-1.82261	0.0727022	0.999824	-4.1254
FGR	-0.210272	8.65794	-1.82247	0.0727236	0.999824	-4.15934
USP3	-0.14392	6.15059	-1.82153	0.0728686	0.999824	-4.11979
FAM53A	0.313122	-0.56371	1.82152	0.0728694	0.999824	-4.42856
H2AFY	-0.148174	7.25213	-1.82123	0.0729151	0.999824	-4.13493
TOM1L2	-0.132015	4.80442	-1.8203	0.0730571	0.999824	-4.11421
FRG1	-0.203953	3.62014	-1.81986	0.0731253	0.999824	-4.13858
AC007326.4	-1.62114	-3.66405	-1.81965	0.0731571	0.999824	-4.558
FPR1	-0.358951	9.2506	-1.81957	0.07317	0.999824	-4.17225
ABHD12B	-0.359953	0.981708	-1.81952	0.0731782	0.999824	-4.30454
LINC00933	-0.570938	-1.88141	-1.8188	0.0732882	0.999824	-4.4939
PCBP4	0.219271	2.65794	1.8188	0.073289	0.999824	-4.18339
AC079793.1	-0.319612	0.938961	-1.81831	0.073365	0.999824	-4.32065
AC004381.3	0.61786	-2.50129	1.818	0.0734126	0.999824	-4.50924
ARMCX4	0.204432	1.44741	1.81718	0.0735392	0.999824	-4.26914
ACSF2	0.236496	2.78229	1.81694	0.0735756	0.999824	-4.17053
ZHX1-C8orf76	0.407261	-0.0600659	1.81648	0.0736472	0.999824	-4.39992
LILRB2	-0.234619	7.09604	-1.81646	0.0736515	0.999824	-4.13677
BOD1L1	-0.217377	7.15124	-1.81638	0.073663	0.999824	-4.13828
SGMS2	-0.295734	2.53425	-1.81634	0.0736699	0.999824	-4.18601
AC017083.1	-0.433265	-1.71634	-1.81601	0.073721	0.999824	-4.4978
MAPK1	-0.203215	7.14262	-1.81593	0.0737323	0.999824	-4.13938
MYCBP	-0.166892	3.84942	-1.81576	0.0737589	0.999824	-4.13131
ZDHHC18	-0.301347	8.20576	-1.81522	0.0738427	0.999824	-4.15635
ECE1	-0.299207	7.06532	-1.81511	0.0738608	0.999824	-4.13752
ARAP3	-0.270761	6.06555	-1.81435	0.0739782	0.999824	-4.12543
TP53I11	-0.320386	5.70472	-1.81409	0.0740192	0.999824	-4.12187
LILRB3	-0.303655	7.61738	-1.81369	0.0740814	0.999824	-4.1473
SUPT20H	-0.152467	5.19992	-1.81368	0.0740824	0.999824	-4.11993
LINC02210	0.183111	3.04661	1.81359	0.0740962	0.999824	-4.16379
UBA7	0.100059	6.37281	1.81357	0.0740998	0.999824	-4.12928
AL109809.1	-0.360442	0.0473035	-1.81195	0.0743527	0.999824	-4.37984
DFFA	0.120139	4.42708	1.8119	0.0743611	0.999824	-4.12475
LINC00598	0.430399	-0.210703	1.81188	0.0743629	0.999824	-4.40608
MAK	-0.413885	2.96131	-1.8118	0.0743761	0.999824	-4.17159
SLC25A4	0.219484	1.63748	1.81112	0.074482	0.999824	-4.25841
LINC02449	-0.31925	1.58073	-1.81091	0.0745154	0.999824	-4.27244
CDKN2C	0.253786	1.18102	1.80956	0.0747273	0.999824	-4.30128
SEMA4A	-0.300913	6.28194	-1.80916	0.0747893	0.999824	-4.13136
TSR2	0.111321	4.47739	1.80903	0.07481	0.999824	-4.12668
AC145285.6	0.434106	-1.09123	1.80901	0.0748129	0.999824	-4.45688
LINC01122	0.749606	-2.53396	1.80852	0.0748904	0.999824	-4.52195
IBA57	0.148956	3.18669	1.80805	0.0749647	0.999824	-4.16107
VEGFA	-0.235828	2.89965	-1.80787	0.0749931	0.999824	-4.17317
HMGN2P46	0.47199	-0.848313	1.80765	0.075027	0.999824	-4.44422
MTMR3	-0.223988	6.86739	-1.80753	0.0750461	0.999824	-4.14112
GAB3	-0.149585	5.00022	-1.80742	0.0750633	0.999824	-4.12535
AC137834.1	-0.945168	-2.71701	-1.80738	0.0750693	0.999824	-4.5113
AL627309.6	-0.348502	6.43597	-1.80734	0.075076	0.999824	-4.13509
DHRS4-AS1	0.121646	3.13523	1.80658	0.0751956	0.999824	-4.16377
ASAH1	-0.195145	7.34341	-1.80643	0.0752186	0.999824	-4.14911
WDR76	0.197583	1.94344	1.80613	0.0752666	0.999824	-4.23718
AL162741.1	-0.437567	-0.842718	-1.80612	0.0752684	0.999824	-4.45692
C5AR1	-0.343874	8.17569	-1.80543	0.0753767	0.999824	-4.16404
AC116366.2	-0.372908	1.96052	-1.80491	0.075459	0.999824	-4.23805
NFE2L3P1	-0.555845	-1.83324	-1.80423	0.075567	0.999824	-4.49685
CD59	-0.208499	5.24852	-1.80419	0.0755727	0.999824	-4.12852
NOP56	0.133897	5.5362	1.80381	0.0756337	0.999824	-4.13033
AC092428.1	0.554036	-1.60589	1.80353	0.0756771	0.999824	-4.48953
NLRC4	-0.260409	4.56065	-1.80288	0.0757809	0.999824	-4.13169
AC138150.2	-0.43438	0.0691342	-1.8025	0.0758408	0.999824	-4.39681
MAP3K5	-0.200697	5.55143	-1.80218	0.0758921	0.999824	-4.13218
LINC00352	0.541531	-1.87817	1.80162	0.0759818	0.999824	-4.50257
LIMD1	0.137147	4.5464	1.80076	0.0761185	0.999824	-4.13278
NT5C	0.177455	3.45441	1.80075	0.0761194	0.999824	-4.15455
KRT73-AS1	-0.400821	0.161816	-1.80067	0.0761326	0.999824	-4.38441
AC097637.1	0.853145	2.04119	1.80059	0.0761457	0.999824	-4.23601
PARP3	0.236152	2.16341	1.80021	0.0762059	0.999824	-4.23115
PNMA8C	0.63108	-2.05424	1.80008	0.0762264	0.999824	-4.51038
NATD1	-0.27563	6.10688	-1.79974	0.0762803	0.999824	-4.13818
KCNJ2-AS1	-0.421406	0.319224	-1.79965	0.0762948	0.999824	-4.36597
POLRMT	0.148497	5.0629	1.79913	0.076378	0.999824	-4.13304
HK2	-0.273882	5.46084	-1.79907	0.0763881	0.999824	-4.1344
CTBS	-0.240027	5.37829	-1.799	0.0763983	0.999824	-4.13411
CXorf40B	0.128442	3.24159	1.79859	0.0764648	0.999824	-4.16832
CIITA	0.260778	6.55089	1.79842	0.076492	0.999824	-4.14704
AC012673.1	-0.646295	-2.05444	-1.79781	0.0765893	0.999824	-4.51334
RFX2	-0.406099	4.04125	-1.79774	0.076601	0.999824	-4.14237
GPATCH2	0.202367	1.94826	1.79736	0.0766613	0.999824	-4.23775
ANTKMT	0.173898	2.70584	1.79657	0.076789	0.999824	-4.19493
GATD1	0.128873	4.69481	1.79627	0.0768356	0.999824	-4.13662
ZNF503-AS2	-0.562643	-2.29739	-1.79624	0.0768408	0.999824	-4.51644
CICP4	-0.744238	-1.59576	-1.79586	0.0769019	0.999824	-4.49701
LARGE1	0.379325	0.910516	1.79545	0.0769675	0.999824	-4.3019
AMOT	0.293627	0.460755	1.79526	0.0769995	0.999824	-4.34655
AF121898.1	0.629989	-2.42147	1.79516	0.0770147	0.999824	-4.52213
GAS7	-0.218746	6.24593	-1.79471	0.0770877	0.999824	-4.14501
AL627309.5	-0.443072	6.28138	-1.79455	0.0771125	0.999824	-4.14564
MOSPD2	-0.280544	4.92678	-1.79419	0.0771706	0.999824	-4.13726
AL023806.3	-0.288998	0.144365	-1.79408	0.0771894	0.999824	-4.3791
LYST	-0.239021	7.02777	-1.79378	0.0772374	0.999824	-4.15711
DHX34	-0.251715	6.17807	-1.79378	0.0772378	0.999824	-4.14437
NDN	-0.769164	-2.3811	-1.79333	0.0773104	0.999824	-4.5218
PGAM5	0.101019	3.68768	1.7929	0.0773784	0.999824	-4.15596
TNFRSF13C	0.424871	4.27867	1.7926	0.0774279	0.999824	-4.14075
FAM225A	-1.05519	-0.667981	-1.79214	0.0775013	0.999824	-4.44903
APOBEC3A	-0.340112	6.97086	-1.79168	0.0775767	0.999824	-4.15577
C17orf100	0.307888	0.393926	1.79149	0.0776068	0.999824	-4.35993
YIPF1	-0.165742	4.44151	-1.79128	0.0776409	0.999824	-4.14307
SPINDOC	0.158164	2.2777	1.79084	0.0777126	0.999824	-4.22511
AL513327.1	-0.344522	3.168	-1.79035	0.077792	0.999824	-4.18398
COL4A3	0.560158	-0.00442122	1.78998	0.0778518	0.999824	-4.36294
AC008555.7	0.261259	0.545373	1.78948	0.0779335	0.999824	-4.35147
TPM3	-0.121149	8.57293	-1.78943	0.0779408	0.999824	-4.18373
ADGRE3	-0.333763	6.5093	-1.78935	0.0779549	0.999824	-4.15279
HAUS2	0.13616	2.88056	1.78921	0.0779764	0.999824	-4.18983
LPCAT3	-0.18119	4.42039	-1.78918	0.0779812	0.999824	-4.14462
CYSTM1	-0.337199	3.98812	-1.78832	0.0781213	0.999824	-4.1528
RRAGD	-0.244634	3.6126	-1.7881	0.0781575	0.999824	-4.16084
AP000346.2	-0.258169	1.44726	-1.78784	0.0781997	0.999824	-4.28571
AC068888.1	0.249019	1.01358	1.78784	0.0782004	0.999824	-4.32826
STX12	-0.130248	4.28733	-1.78726	0.0782949	0.999824	-4.14733
EXD3	0.215511	2.26552	1.7871	0.0783204	0.999824	-4.22892
ERO1A	-0.165449	5.61025	-1.78665	0.0783945	0.999824	-4.14625
AC010618.2	-0.608339	-2.28816	-1.78617	0.0784732	0.999824	-4.52643
AL139020.1	0.42356	1.03353	1.78614	0.0784772	0.999824	-4.28726
THOC5	-0.161696	5.14275	-1.78552	0.0785787	0.999824	-4.14505
WDR74	0.142659	3.86996	1.78514	0.0786404	0.999824	-4.15847
CCR6	0.271315	3.48413	1.78514	0.0786407	0.999824	-4.16152
SLC1A3	-0.701158	-1.6437	-1.78472	0.0787099	0.999824	-4.49859
TMEM107	0.118414	2.58321	1.78373	0.078872	0.999824	-4.20749
ZSCAN16	-0.199314	1.89454	-1.78342	0.0789229	0.999824	-4.25948
AL360181.2	-0.481703	-0.0800493	-1.78337	0.0789308	0.999824	-4.40693
AASS	0.279821	0.628143	1.78306	0.0789825	0.999824	-4.33667
KLC2	0.164343	2.99957	1.78252	0.0790708	0.999824	-4.19043
HRG	0.437768	-1.55664	1.78236	0.0790973	0.999824	-4.48977
HLA-DMB	0.232215	6.38603	1.78227	0.0791127	0.999824	-4.1582
CU638689.4	0.607421	-1.24245	1.78168	0.0792097	0.999824	-4.47846
AL669831.1	-0.312536	7.52079	-1.78162	0.079219	0.999824	-4.17191
TPD52L2	-0.19602	6.80421	-1.78158	0.0792263	0.999824	-4.16199
NBN	-0.24236	5.00948	-1.78128	0.0792745	0.999824	-4.1488
FAM131A	-0.147798	3.70734	-1.78121	0.0792873	0.999824	-4.16599
ITGA5	-0.226803	6.96536	-1.7797	0.079536	0.999824	-4.16625
TRIM9	-0.621197	-0.589657	-1.77964	0.0795456	0.999824	-4.42678
C9orf139	-0.204927	4.23255	-1.7796	0.0795524	0.999824	-4.15593
KCND1	-0.28509	1.05969	-1.77882	0.0796811	0.999824	-4.32665
HIST2H2BE	-0.323718	4.19608	-1.77881	0.0796836	0.999824	-4.15854
AC018529.1	-0.494706	-1.82397	-1.77852	0.0797314	0.999824	-4.50055
SEC22B	-0.158247	5.69482	-1.77816	0.0797909	0.999824	-4.15452
EBP	0.176763	3.15252	1.77813	0.079795	0.999824	-4.18901
TULP4	0.179845	2.88482	1.7778	0.0798505	0.999824	-4.19496
PELO	-0.206072	3.47419	-1.7775	0.0799005	0.999824	-4.1764
IGLV2-18	0.70485	-1.34525	1.77691	0.0799981	0.999824	-4.48198
SNX20	-0.125528	6.1505	-1.77657	0.080054	0.999824	-4.15926
AATK	-0.321875	6.39539	-1.77642	0.0800786	0.999824	-4.16066
TMIE	-0.466192	-1.00626	-1.7762	0.0801155	0.999824	-4.47269
AC009244.2	0.811195	-2.60953	1.77609	0.0801344	0.999824	-4.531
TTLL4	-0.18511	4.13816	-1.77607	0.0801382	0.999824	-4.15987
VPS8	-0.176032	5.21077	-1.7757	0.0801991	0.999824	-4.154
AL121900.2	-1.14025	-1.59252	-1.77563	0.0802113	0.999824	-4.4839
RALGAPA2	-0.224086	5.24094	-1.77537	0.0802533	0.999824	-4.15445
LRRC4	-0.346	4.86913	-1.77534	0.0802591	0.999824	-4.15433
MZT2B	0.261952	4.34081	1.77516	0.0802897	0.999824	-4.15882
SYNGAP1-AS1	-0.945631	-2.43717	-1.77451	0.0803976	0.999824	-4.53728
GTF3C2-AS1	0.400821	-1.14606	1.77424	0.0804426	0.999824	-4.47294
ARPC5	-0.189596	8.15067	-1.77378	0.0805192	0.999824	-4.18917
FAM214B	-0.229099	5.72353	-1.77376	0.0805222	0.999824	-4.15796
MFSD1	-0.187003	5.47554	-1.77329	0.0806006	0.999824	-4.15699
LTA4H	-0.217172	7.22227	-1.77325	0.0806078	0.999824	-4.17577
SRP9P1	-0.667669	-0.577278	-1.77238	0.0807536	0.999824	-4.43565
U62317.1	-0.599466	-0.741117	-1.77219	0.0807842	0.999824	-4.45572
FHDC1	-0.268587	1.47172	-1.77212	0.0807961	0.999824	-4.29716
HFE	-0.156224	2.50683	-1.77189	0.0808344	0.999824	-4.2249
FTH1	-0.271588	10.587	-1.77053	0.081063	0.999824	-4.23579
NDUFB6	-0.215257	3.26819	-1.77044	0.0810788	0.999824	-4.19022
MAPKBP1	0.129373	3.53919	1.77039	0.0810871	0.999824	-4.1784
PAN3-AS1	0.212395	0.420371	1.77014	0.0811289	0.999824	-4.37349
AC007040.2	0.461832	-0.379216	1.76925	0.0812789	0.999824	-4.43814
AC136624.1	-0.698199	-1.30418	-1.76904	0.0813132	0.999824	-4.47919
ORM1	-0.671164	2.25988	-1.7689	0.0813373	0.999824	-4.24529
AC007106.2	0.568438	-1.70704	1.76884	0.0813477	0.999824	-4.49809
AC010616.1	1.63096	-4.0901	1.76768	0.0815432	0.999824	-4.55973
LDHA	-0.140595	6.39571	-1.76734	0.0815995	0.999824	-4.16935
SELL	-0.276101	9.94079	-1.7671	0.0816413	0.999824	-4.22418
DENND10	-0.171337	5.18478	-1.76699	0.0816591	0.999824	-4.16161
AC002996.1	-1.83519	-1.72372	-1.76662	0.0817215	0.999824	-4.51296
ZNF746	-0.246312	5.90629	-1.76638	0.081763	0.999824	-4.16606
CTRC	0.412705	-0.340292	1.76607	0.0818152	0.999824	-4.43557
AOC2	-0.338821	3.0495	-1.76557	0.0818997	0.999824	-4.20245
FGD5P1	0.475322	-2.01735	1.76515	0.0819708	0.999824	-4.51225
ITM2B	-0.251336	10.0167	-1.76385	0.0821912	0.999824	-4.22908
AL031716.1	-0.522446	-2.05007	-1.76361	0.0822324	0.999824	-4.5098
RORA-AS1	0.580138	-2.28377	1.76356	0.0822398	0.999824	-4.51995
SERPINB8	-0.181837	3.91999	-1.76322	0.0822984	0.999824	-4.17521
ME2	-0.117573	5.48454	-1.76277	0.0823747	0.999824	-4.1665
AL354714.1	0.372796	-0.103576	1.76224	0.0824646	0.999824	-4.40716
DOC2A	0.426946	-1.1337	1.76182	0.0825374	0.999824	-4.47418
CD52	0.463576	6.00695	1.7615	0.0825904	0.999824	-4.17265
PFKL	0.15123	6.58637	1.76104	0.0826696	0.999824	-4.17775
HIPK1-AS1	-0.462799	-0.795665	-1.76056	0.0827511	0.999824	-4.45638
ACTG1P17	0.374194	-0.785235	1.76004	0.0828396	0.999824	-4.45434
RPS19P3	-0.437463	-1.70949	-1.75998	0.0828509	0.999824	-4.50918
PI3	-0.565971	5.54346	-1.75898	0.0830211	0.999824	-4.16964
CCN3	-0.382358	3.04279	-1.75887	0.0830413	0.999824	-4.21268
CNN2P1	-0.899829	-2.53339	-1.75882	0.0830492	0.999824	-4.53804
AL035106.1	-0.421908	-0.339785	-1.7584	0.0831213	0.999824	-4.42786
ZNF703	0.301285	2.51001	1.75715	0.0833358	0.999824	-4.23157
MTRNR2L4	0.537415	-1.32808	1.75708	0.083347	0.999824	-4.48371
TELO2	0.145855	4.40205	1.75687	0.083383	0.999824	-4.1732
AL121820.3	0.482732	-0.942103	1.75669	0.0834141	0.999824	-4.44951
FRAT2	-0.295593	7.92567	-1.75663	0.0834255	0.999824	-4.1988
AC073111.4	0.172197	3.92497	1.7561	0.0835156	0.999824	-4.18112
AC099489.1	-0.363688	5.591	-1.75595	0.0835417	0.999824	-4.17208
LILRA2	-0.300762	7.10819	-1.75561	0.0836006	0.999824	-4.18795
VXN	-0.904477	-2.48942	-1.75555	0.0836111	0.999824	-4.53165
CCDC50	0.302915	3.93587	1.75543	0.083632	0.999824	-4.17805
TMEM184B	-0.203784	5.50572	-1.75518	0.0836743	0.999824	-4.17288
BMP6	-0.376612	1.85377	-1.75509	0.0836901	0.999824	-4.28418
OSER1	-0.185209	5.22036	-1.75501	0.0837038	0.999824	-4.17223
ASGR1	-0.249799	2.88026	-1.75498	0.0837083	0.999824	-4.2209
AC145098.2	-0.357336	1.56978	-1.75451	0.0837901	0.999824	-4.30472
SOS2	-0.245883	5.52005	-1.75442	0.0838052	0.999824	-4.1743
LINC02012	0.549837	-1.32583	1.75408	0.0838641	0.999824	-4.48618
AC135050.7	0.326438	-0.0420805	1.75395	0.0838863	0.999824	-4.41823
C4orf3	-0.163231	5.93314	-1.75323	0.0840114	0.999824	-4.17708
WDR11-AS1	0.380862	0.00780634	1.75309	0.0840352	0.999824	-4.4124
PPP1R37	0.135037	3.76967	1.75287	0.0840733	0.999824	-4.18703
ZNF528-AS1	0.267146	1.77738	1.7526	0.0841204	0.999824	-4.27879
PPIAP53	-0.250102	1.47375	-1.75182	0.084255	0.999824	-4.31275
GBA	-0.206751	5.11977	-1.75172	0.0842725	0.999824	-4.17497
FSCN1	-0.284275	1.85356	-1.75151	0.0843093	0.999824	-4.28268
KIF3C	-0.249932	2.83918	-1.75126	0.0843522	0.999824	-4.22642
LITAF	-0.297495	9.41565	-1.75103	0.0843925	0.999824	-4.22675
RNF13	-0.236625	6.08497	-1.75096	0.0844051	0.999824	-4.18128
ZNF527	0.222987	1.89821	1.75089	0.0844169	0.999824	-4.27429
SHMT2	0.165843	4.84361	1.75066	0.0844571	0.999824	-4.17621
KIAA0513	-0.219021	6.87254	-1.75038	0.0845055	0.999824	-4.18922
TTC1	-0.115419	4.65522	-1.74972	0.0846199	0.999824	-4.17794
MEGF9	-0.299634	7.54497	-1.74934	0.0846858	0.999824	-4.19967
ZFP82	0.205062	2.00147	1.74932	0.0846905	0.999824	-4.26645
TSEN54	0.183742	4.27905	1.74914	0.0847215	0.999824	-4.18234
WIPI1	-0.191115	4.32306	-1.74881	0.0847786	0.999824	-4.18175
DNM1P46	-0.418588	-0.684063	-1.74851	0.08483	0.999824	-4.44997
LRRC49	0.429626	-1.13976	1.74805	0.0849105	0.999824	-4.47539
BRD8	-0.132348	5.11873	-1.74798	0.0849233	0.999824	-4.17831
ZBTB32	0.313404	0.640974	1.7479	0.0849374	0.999824	-4.36568
RASGRF2-AS1	0.360068	-0.789074	1.74781	0.0849527	0.999824	-4.45649
ANKMY1	0.132677	3.56133	1.74778	0.084958	0.999824	-4.19682
AP001626.1	0.49536	-1.94943	1.74738	0.0850286	0.999824	-4.51189
AC008267.5	-0.46865	-1.70443	-1.74728	0.0850461	0.999824	-4.50415
INPP5E	0.163144	3.08525	1.74717	0.085064	0.999824	-4.2116
AL161756.3	0.286513	-0.577189	1.74687	0.0851176	0.999824	-4.44088
SYF2	-0.128925	5.2371	-1.74622	0.0852312	0.999824	-4.17994
AP001922.3	-0.63522	-2.42057	-1.74604	0.0852627	0.999824	-4.52479
CDK5R1	-0.281835	3.35178	-1.74593	0.0852817	0.999824	-4.20533
LINC01619	-0.346653	-0.126913	-1.74591	0.0852844	0.999824	-4.41957
TMOD4	-0.365179	-0.197327	-1.74581	0.0853031	0.999824	-4.42033
IGHM	0.39429	8.01151	1.7455	0.0853562	0.999824	-4.21387
ZNF506	0.128939	4.4241	1.74533	0.0853866	0.999824	-4.183
CASC3	-0.199055	6.91277	-1.7452	0.0854093	0.999824	-4.19439
PORCN	0.149312	2.16627	1.74515	0.0854183	0.999824	-4.26469
DMAC2	0.104149	3.79557	1.74488	0.0854659	0.999824	-4.19401
AC011447.6	0.395102	-1.47861	1.74473	0.0854924	0.999824	-4.48898
EXTL3	-0.245909	5.61819	-1.74441	0.0855484	0.999824	-4.18306
GABPB2	0.136926	4.24104	1.7436	0.0856899	0.999824	-4.1864
RBM47	-0.282507	5.93768	-1.74338	0.085729	0.999824	-4.18722
AC007952.2	0.406375	2.37024	1.74268	0.0858519	0.999824	-4.25304
AC127035.1	0.548476	-0.035655	1.74177	0.0860124	0.999824	-4.41795
MME	-0.343128	7.57676	-1.74154	0.0860535	0.999824	-4.20587
MARCH5	-0.171325	3.86388	-1.74069	0.0862033	0.999824	-4.19477
SDCBP2-AS1	-0.223195	1.6362	-1.74055	0.0862282	0.999824	-4.29237
TMEM53	0.183295	0.930371	1.74025	0.0862804	0.999824	-4.34996
FEN1	0.186325	2.32309	1.74005	0.0863162	0.999824	-4.2562
AC022400.2	-0.451248	-1.79646	-1.73991	0.0863402	0.999824	-4.50697
PLIN1	0.575005	-2.46673	1.7398	0.0863612	0.999824	-4.53461
AC245128.3	-1.95199	-2.01141	-1.73964	0.0863886	0.999824	-4.53433
NCF4	-0.273426	7.70714	-1.73957	0.0864013	0.999824	-4.20801
PADI4	-0.357032	6.67939	-1.73949	0.0864151	0.999824	-4.19556
CARMIL2	0.182003	5.13653	1.73912	0.0864804	0.999824	-4.18633
MMP9	-0.527225	6.75689	-1.73896	0.0865095	0.999824	-4.19573
ATP5MC2P3	-0.720579	-2.70479	-1.73871	0.0865535	0.999824	-4.53296
AC087289.3	-1.26675	-1.49544	-1.73851	0.0865897	0.999824	-4.4767
DHX40	-0.150602	4.2619	-1.73845	0.0866004	0.999824	-4.19016
IGFBPL1	0.398102	-0.578408	1.73844	0.0866006	0.999824	-4.44798
MAP4K1	0.191648	5.62354	1.73815	0.0866527	0.999824	-4.18897
NR5A2	0.713429	-1.87272	1.73807	0.0866664	0.999824	-4.51636
LY6G5B	0.163784	3.6831	1.73757	0.0867549	0.999824	-4.20245
TTC28	0.343518	0.630512	1.73735	0.0867943	0.999824	-4.36643
LYN	-0.277326	8.49338	-1.73729	0.0868059	0.999824	-4.22319
RGL4	-0.289657	3.92802	-1.73661	0.0869265	0.999824	-4.19944
DUS3L	0.156735	3.65677	1.73658	0.0869321	0.999824	-4.20476
AC234775.4	0.657588	-2.15847	1.73601	0.0870334	0.999824	-4.52849
VASN	-0.587406	-1.26658	-1.73587	0.0870582	0.999824	-4.48934
PTPN12	-0.226947	5.8074	-1.73573	0.0870833	0.999824	-4.19246
CYP2J2	-0.648932	-2.32406	-1.73567	0.0870935	0.999824	-4.52871
AL390879.1	0.262794	0.429841	1.73564	0.0870987	0.999824	-4.38378
AL023806.4	-0.519615	-2.21785	-1.73468	0.0872703	0.999824	-4.515
AL445685.3	-0.172869	4.40755	-1.73451	0.0872998	0.999824	-4.193
RYR2	0.997005	-2.95743	1.7341	0.0873736	0.999824	-4.54451
CCNJL	-0.396676	5.28763	-1.73395	0.0874007	0.999824	-4.19093
AC069547.2	0.59183	-1.68725	1.73376	0.0874347	0.999824	-4.50482
AL391903.1	-0.470462	-0.00893633	-1.73371	0.0874438	0.999824	-4.4137
VDR	-0.285967	4.02837	-1.73355	0.0874727	0.999824	-4.19952
SDF2	-0.161504	4.53227	-1.73343	0.087494	0.999824	-4.19304
AC005387.2	-0.513309	-1.85939	-1.73336	0.087506	0.999824	-4.51164
OAT	-0.187568	4.21861	-1.73331	0.0875151	0.999824	-4.19547
TMEM101	0.130321	3.68063	1.73328	0.0875209	0.999824	-4.20591
ZSCAN31	0.404311	-1.4437	1.73323	0.0875293	0.999824	-4.4913
ABCC5	-0.227411	4.87105	-1.73269	0.0876266	0.999824	-4.19169
SLC9A8	-0.216261	5.5424	-1.73255	0.0876511	0.999824	-4.19284
HAL	-0.29836	5.74127	-1.73216	0.0877201	0.999824	-4.19423
AL354811.2	-0.540967	-2.16906	-1.7315	0.0878389	0.999824	-4.51842
TLR2	-0.33681	7.07582	-1.73132	0.087871	0.999824	-4.2076
MRVI1	-0.379321	5.35455	-1.73108	0.0879143	0.999824	-4.19361
DBN1	-0.207417	3.78646	-1.73082	0.0879608	0.999824	-4.20629
RAB32	-0.23093	4.27823	-1.73077	0.0879696	0.999824	-4.19789
RBM11	-0.537201	-1.28514	-1.7304	0.0880369	0.999824	-4.48986
ELL	-0.221089	5.90511	-1.73039	0.0880377	0.999824	-4.19722
GMIP	-0.187878	7.55128	-1.73008	0.0880945	0.999824	-4.21419
HIST1H2AC	-0.27095	6.51789	-1.73006	0.0880973	0.999824	-4.2025
TCL1A	0.468145	4.39176	1.72996	0.0881157	0.999824	-4.19482
AL096865.1	-0.482861	-0.911157	-1.7296	0.0881812	0.999824	-4.47879
ARNTL	-0.162181	4.66556	-1.72937	0.0882225	0.999824	-4.19505
MYO1B	0.560708	-1.03333	1.72803	0.0884629	0.999824	-4.46361
LINC00336	-0.491295	-2.04572	-1.72782	0.0885024	0.999824	-4.51411
TMCO3	-0.199745	4.48311	-1.72732	0.0885925	0.999824	-4.19836
CAP1	-0.193742	9.12455	-1.72703	0.0886436	0.999824	-4.23931
RRAS2	0.302029	2.58157	1.72696	0.0886566	0.999824	-4.23983
RPL12P27	-0.502719	-1.72627	-1.72654	0.0887328	0.999824	-4.501
ROPN1L	-0.36301	2.71149	-1.7262	0.0887944	0.999824	-4.24938
METTL21EP	-0.267117	0.465532	-1.72615	0.0888031	0.999824	-4.38958
TMEM43	-0.197685	6.2753	-1.72611	0.0888115	0.999824	-4.2042
PPIAL4C	-1.18333	-3.29117	-1.72598	0.0888338	0.999824	-4.55121
RPS3AP38	-0.560668	-2.27923	-1.72588	0.0888526	0.999824	-4.52325
AL441992.2	-0.367294	1.19615	-1.72561	0.0889006	0.999824	-4.33133
NUGGC	0.287053	2.15648	1.72516	0.0889836	0.999824	-4.2744
AC110615.1	0.491674	-1.54582	1.72495	0.0890212	0.999824	-4.50133
AC138207.4	0.265557	0.53049	1.72491	0.0890273	0.999824	-4.37846
DISP3	0.643764	-2.30115	1.72488	0.0890332	0.999824	-4.52873
AC026954.3	0.746869	-1.67873	1.72475	0.0890573	0.999824	-4.50828
NCOA1	-0.225259	6.12047	-1.72423	0.0891509	0.999824	-4.20455
FFAR2	-0.33493	7.48225	-1.72422	0.0891539	0.999824	-4.2184
YPEL1	0.200402	3.37443	1.72418	0.08916	0.999824	-4.21852
NCF4-AS1	-0.471085	-0.745532	-1.72376	0.0892362	0.999824	-4.4598
NDEL1	-0.231365	6.38146	-1.72346	0.0892921	0.999824	-4.20689
ACTR3	-0.159884	7.80122	-1.72292	0.0893906	0.999824	-4.22429
BNIP3P28	0.605716	-1.96844	1.72226	0.0895091	0.999824	-4.51477
UBE2D1	-0.279047	5.67816	-1.72166	0.0896192	0.999824	-4.20352
THEMIS2	-0.238535	7.95526	-1.72158	0.0896332	0.999824	-4.22634
MITF	-0.314278	0.219418	-1.72134	0.0896772	0.999824	-4.39942
AC026150.2	-0.845862	-1.4742	-1.72107	0.0897261	0.999824	-4.49937
NBEAL2	-0.183085	8.51298	-1.7206	0.0898126	0.999824	-4.23429
ZNF674-AS1	0.205845	0.812464	1.72057	0.0898183	0.999824	-4.37033
FAM120AOS	-0.0888382	4.98124	-1.71921	0.090068	0.999824	-4.20334
ALOX5	-0.261153	7.79531	-1.71879	0.0901447	0.999824	-4.22655
ERICH1	-0.179397	4.89538	-1.71842	0.090212	0.999824	-4.2041
CXCR5	0.298328	4.67778	1.71798	0.090293	0.999824	-4.20483
RNASE1	-0.650961	-2.05848	-1.71772	0.0903403	0.999824	-4.53231
CEP19	-0.270857	4.18554	-1.71764	0.0903554	0.999824	-4.20893
TM7SF2	0.218131	1.87616	1.71739	0.0904001	0.999824	-4.29533
AC020558.2	0.530944	-1.50342	1.71738	0.0904019	0.999824	-4.50741
FBXL8	0.196527	2.06436	1.71725	0.0904271	0.999824	-4.29056
AC066613.1	-0.299262	0.37411	-1.71705	0.0904637	0.999824	-4.39387
AC018738.1	-1.79703	-4.20972	-1.71617	0.0906255	0.999824	-4.56482
AC107983.1	-1.79703	-4.20972	-1.71617	0.0906255	0.999824	-4.56482
MRPL37P1	0.57083	-2.35142	1.71616	0.0906269	0.999824	-4.52605
LINC02324	0.322945	0.726237	1.71528	0.0907885	0.999824	-4.37192
UBAP1	-0.175045	5.94983	-1.71474	0.0908881	0.999824	-4.21061
LINC02710	-0.642304	-2.23199	-1.71468	0.0908995	0.999824	-4.5298
LINC01089	0.127624	4.21977	1.71439	0.090954	0.999824	-4.21229
RRAGC	-0.155981	4.44522	-1.71435	0.09096	0.999824	-4.2093
DPP7	0.156405	5.98282	1.71369	0.0910826	0.999824	-4.21181
PAK1	-0.247609	6.9919	-1.71362	0.0910955	0.999824	-4.22085
RFPL3S	0.289888	0.285796	1.71339	0.0911376	0.999824	-4.4036
TRPV5	-0.751034	-1.69385	-1.71331	0.0911523	0.999824	-4.5155
CCDC71L	-0.236443	3.97647	-1.7132	0.0911737	0.999824	-4.21661
EIF2S2P3	0.39264	-1.49582	1.71316	0.0911811	0.999824	-4.49366
AC018755.2	-0.432345	5.07053	-1.71312	0.0911875	0.999824	-4.20862
FERMT3	-0.183749	7.30199	-1.71306	0.0911986	0.999824	-4.22455
AL121832.3	-0.234501	0.0507087	-1.71271	0.0912648	0.999824	-4.42018
ADAMDEC1	-0.610052	-2.12602	-1.71257	0.0912903	0.999824	-4.5284
OSBPL2	-0.201872	6.08986	-1.71182	0.0914286	0.999824	-4.2141
ZNF853	0.1972	1.79232	1.71158	0.0914736	0.999824	-4.30236
CLIP1	-0.164418	5.42868	-1.71146	0.0914964	0.999824	-4.21092
OR7E14P	-0.760804	-2.70689	-1.71104	0.0915743	0.999824	-4.54485
GPR107	-0.130839	5.21632	-1.71065	0.0916471	0.999824	-4.21094
ARHGEF17	-0.59296	-0.58095	-1.71041	0.0916915	0.999824	-4.45612
ZNF566	0.147705	2.25703	1.70986	0.0917932	0.999824	-4.27622
CRIM1	0.259147	1.48902	1.70981	0.0918029	0.999824	-4.31723
AC024267.3	-0.306979	1.08031	-1.7098	0.0918038	0.999824	-4.35268
AC099548.2	-0.381066	1.606	-1.70928	0.0919013	0.999824	-4.33318
SMIM25	-0.253467	6.08454	-1.70899	0.0919541	0.999824	-4.2162
TBC1D14	-0.227058	6.55539	-1.70894	0.0919652	0.999824	-4.22094
STK35	-0.142865	4.91784	-1.70886	0.0919793	0.999824	-4.21229
AC092718.7	0.438071	-1.0043	1.70844	0.092057	0.999824	-4.48163
C19orf47	0.132836	2.50318	1.7081	0.0921214	0.999824	-4.27109
SOX12	0.188937	2.84772	1.70798	0.0921434	0.999824	-4.25168
ALOX15B	-0.586114	-0.685933	-1.70732	0.092266	0.999824	-4.47477
AL137779.1	0.533273	-1.66585	1.70728	0.0922738	0.999824	-4.50465
PGM2L1	0.168141	2.65493	1.70705	0.0923173	0.999824	-4.25769
PAX5	0.40698	4.05545	1.70667	0.0923874	0.999824	-4.21631
CHRNA10	-0.220477	0.849911	-1.7064	0.092439	0.999824	-4.37666
DLGAP3	0.319375	-0.0745304	1.7064	0.092439	0.999824	-4.42569
PLEKHH1	0.458456	-1.09153	1.70614	0.0924867	0.999824	-4.48098
SLC50A1	0.119331	3.43089	1.70613	0.0924882	0.999824	-4.23415
NFE4	-0.397352	1.83438	-1.70573	0.0925631	0.999824	-4.31894
AC060766.4	0.413772	-1.05691	1.70492	0.0927149	0.999824	-4.48778
CNFN	0.608081	-2.62702	1.70488	0.0927225	0.999824	-4.5305
AC010632.2	0.600095	-2.32198	1.70427	0.092838	0.999824	-4.52671
PURPL	0.363782	-0.350479	1.70323	0.0930332	0.999824	-4.44764
AP000311.1	-0.868775	-1.53722	-1.70315	0.0930476	0.999824	-4.5073
CD302	-0.209411	5.94154	-1.70273	0.093128	0.999824	-4.22126
ANAPC13	-0.150167	3.98212	-1.7027	0.0931328	0.999824	-4.22483
MRPS18A	0.142193	3.03058	1.70045	0.0935565	0.999824	-4.25282
DOT1L	0.131544	4.48666	1.70043	0.093562	0.999824	-4.22106
COP1	-0.210122	5.57964	-1.70019	0.0936065	0.999824	-4.22106
CPNE7	0.570156	-1.47926	1.69989	0.0936631	0.999824	-4.49681
MSL1	-0.238071	7.77879	-1.69973	0.0936938	0.999824	-4.2418
UGP2	-0.143847	5.52146	-1.69963	0.0937121	0.999824	-4.22127
FAM157B	-0.383011	4.00007	-1.69949	0.0937398	0.999824	-4.22747
GNMT	-0.258431	0.31478	-1.69924	0.0937866	0.999824	-4.41324
AP002381.2	-0.274083	2.20779	-1.69921	0.0937924	0.999824	-4.29364
CPA3	-0.544391	1.18013	-1.6991	0.093813	0.999824	-4.33891
C3	-0.428519	0.432613	-1.69849	0.0939289	0.999824	-4.38945
FEZ2	-0.144523	3.56922	-1.69765	0.0940868	0.999824	-4.23619
MYO9A	0.121775	3.60575	1.69753	0.0941113	0.999824	-4.23478
LINC00963	-0.20754	5.41377	-1.69731	0.0941516	0.999824	-4.22273
OR2H2	-0.398938	-1.31647	-1.69717	0.0941783	0.999824	-4.49608
RAD54L	0.451563	-1.2978	1.69671	0.0942658	0.999824	-4.49176
RPS28P7	0.460044	1.69089	1.6965	0.0943065	0.999824	-4.32623
FAM53C	-0.265489	6.56169	-1.69641	0.0943227	0.999824	-4.23095
DPH3	-0.165772	3.53532	-1.69614	0.0943743	0.999824	-4.23773
UIMC1	-0.151665	5.12123	-1.69593	0.0944143	0.999824	-4.22335
AC010536.1	0.407074	-1.82018	1.69516	0.094562	0.999824	-4.51791
TLR8	-0.256953	6.39397	-1.69502	0.0945876	0.999824	-4.23123
ARHGEF40	-0.323983	6.00124	-1.69477	0.094635	0.999824	-4.22785
FOS	-0.323256	5.81371	-1.69463	0.0946625	0.999824	-4.22673
LIX1L-AS1	0.317353	-0.521612	1.69438	0.0947109	0.999824	-4.45855
PHF12	-0.173618	6.20719	-1.69425	0.0947357	0.999824	-4.22983
KIN	-0.129414	3.40711	-1.69409	0.0947647	0.999824	-4.24483
NUDT4B	-1.09305	0.00599023	-1.69391	0.0947997	0.999824	-4.42632
GRIN2D	0.448108	-1.23386	1.69385	0.0948105	0.999824	-4.49188
CHST11	-0.211592	6.48102	-1.69378	0.0948249	0.999824	-4.23237
AL671762.1	1.41029	0.497427	1.69349	0.0948803	0.999824	-4.378
CUL3	-0.165034	5.56963	-1.69335	0.0949061	0.999824	-4.22682
NOTCH1	-0.241855	7.10397	-1.69334	0.0949088	0.999824	-4.23905
SLC9A7	0.200367	3.27444	1.69283	0.0950054	0.999824	-4.2434
LMTK2	-0.206649	4.43096	-1.69216	0.0951342	0.999824	-4.22816
ZNF296	0.230652	2.17175	1.69213	0.0951398	0.999824	-4.29136
ANKRD35	-0.484061	-0.808888	-1.69179	0.095205	0.999824	-4.48401
AC133644.3	-0.253837	2.04386	-1.69157	0.0952474	0.999824	-4.30433
LSM4	0.116725	4.42659	1.69144	0.0952723	0.999824	-4.22934
H3F3A	-0.232573	9.78692	-1.69116	0.0953267	0.999824	-4.27501
MIR762HG	-0.311398	-0.723963	-1.69107	0.0953439	0.999824	-4.46626
ZBTB12	0.316615	-0.529368	1.69092	0.0953725	0.999824	-4.45199
MGAM	-0.408468	7.07393	-1.69068	0.0954182	0.999824	-4.24081
NECTIN1	-0.274146	3.05174	-1.69061	0.0954316	0.999824	-4.25425
PIK3CB	-0.178366	4.34931	-1.69043	0.0954671	0.999824	-4.23015
AL117209.1	0.89746	-2.74987	1.69023	0.0955044	0.999824	-4.54651
MPG	0.129998	3.71162	1.69019	0.0955126	0.999824	-4.2402
DEAF1	0.115768	3.86848	1.68994	0.0955608	0.999824	-4.23735
LAMC1	0.369249	0.980245	1.68991	0.095567	0.999824	-4.34797
PTP4A2P2	-0.700684	-2.63223	-1.68934	0.0956762	0.999824	-4.53767
RN7SL525P	-0.684344	-2.62678	-1.68864	0.0958111	0.999824	-4.53731
LINC01727	0.321919	-0.65142	1.68855	0.0958291	0.999824	-4.45903
KRTCAP2	0.136534	4.52588	1.68852	0.0958348	0.999824	-4.23156
TMBIM1	-0.145496	6.86715	-1.68798	0.0959386	0.999824	-4.24055
H3F3B	-0.223503	9.15862	-1.68787	0.0959589	0.999824	-4.26801
AC007663.4	0.560358	-2.01244	1.68773	0.0959864	0.999824	-4.52504
AC132938.5	-0.277066	1.17988	-1.68731	0.0960665	0.999824	-4.35549
RN7SKP16	-0.540704	-1.48647	-1.68691	0.0961447	0.999824	-4.50819
PXDC1	0.372787	-0.0852605	1.68678	0.0961696	0.999824	-4.43555
VNN3	-0.348805	4.66301	-1.68659	0.0962065	0.999824	-4.23216
PPP1R16B	0.218904	5.34068	1.68614	0.0962939	0.999824	-4.23268
FAM107A	0.696429	-2.00818	1.68586	0.0963481	0.999824	-4.52477
PRPF38B	-0.118095	5.87515	-1.68583	0.0963532	0.999824	-4.23485
CENPW	-0.5818	-2.03498	-1.6851	0.0964952	0.999824	-4.52824
LINC02245	0.312562	1.13372	1.68494	0.0965256	0.999824	-4.35699
SLC16A3	-0.257496	7.65283	-1.68493	0.0965277	0.999824	-4.25053
GLIPR2	-0.203685	7.28564	-1.68452	0.0966066	0.999824	-4.24686
PKMYT1	0.395149	-0.173734	1.68445	0.0966215	0.999824	-4.44454
SMIM14	0.210766	4.62669	1.68443	0.0966248	0.999824	-4.23361
ADCK5	0.169264	2.67189	1.68432	0.0966454	0.999824	-4.27358
AC079915.1	0.534757	-1.2258	1.68388	0.0967311	0.999824	-4.49041
SMARCB1	0.175165	4.76979	1.68377	0.0967534	0.999824	-4.234
AL121933.2	-0.205621	1.88867	-1.68357	0.0967909	0.999824	-4.32125
PAXIP1-AS1	0.192968	1.85952	1.6834	0.0968256	0.999824	-4.31565
TNR	0.61917	-1.38482	1.68336	0.0968324	0.999824	-4.49965
LINC00266-1	-1.2467	-3.60594	-1.68332	0.0968408	0.999824	-4.56084
AP000224.1	0.41717	-0.912507	1.6833	0.0968435	0.999824	-4.485
METTL1	0.246773	0.707957	1.68321	0.0968614	0.999824	-4.39105
SLC6A4	0.344382	-0.439046	1.68316	0.096872	0.999824	-4.46117
PDCD11	0.145815	4.44349	1.68272	0.0969564	0.999824	-4.23633
CHST2	-0.211328	4.45571	-1.68259	0.0969828	0.999824	-4.23628
AL139300.1	1.65944	-4.29363	1.68256	0.0969875	0.999824	-4.56871
SLC5A12	0.698917	-2.43303	1.6822	0.0970589	0.999824	-4.5312
OXER1	-0.309273	3.57474	-1.6819	0.0971173	0.999824	-4.25068
AC107223.1	0.359287	-0.418148	1.68189	0.0971184	0.999824	-4.45364
LEFTY1	-0.623038	-1.77134	-1.68178	0.0971406	0.999824	-4.51735
PIGO	0.140372	3.20324	1.68164	0.0971664	0.999824	-4.25878
AL355337.1	0.544209	-2.1482	1.6816	0.097175	0.999824	-4.52859
KMO	0.280986	2.20041	1.68158	0.0971791	0.999824	-4.28898
NAV1	0.231831	1.83474	1.68149	0.097196	0.999824	-4.32024
AP1G2	0.120256	6.16323	1.68102	0.0972883	0.999824	-4.24045
LINC02212	-0.651743	-2.628	-1.68094	0.0973032	0.999824	-4.5406
NACC2	-0.196828	5.68602	-1.68085	0.0973209	0.999824	-4.23803
TSPEAR-AS2	-0.511893	-1.60824	-1.68064	0.0973632	0.999824	-4.5089
SSBP4	0.183111	5.1239	1.6806	0.0973708	0.999824	-4.23656
AC078795.1	0.369175	-0.409855	1.68049	0.0973914	0.999824	-4.45035
TBCA	-0.217859	2.81556	-1.68049	0.0973923	0.999824	-4.27562
KCNE3	-0.217571	5.97649	-1.67993	0.0975007	0.999824	-4.24026
AC005632.3	-0.324528	1.45533	-1.6799	0.0975068	0.999824	-4.34603
PRIM2	0.133638	2.17996	1.67979	0.0975293	0.999824	-4.30071
SVIL	-0.284589	5.95894	-1.67948	0.0975882	0.999824	-4.24063
IL18	-0.234135	1.59763	-1.67922	0.0976403	0.999824	-4.33908
TIMP2	-0.266221	6.91882	-1.67913	0.0976583	0.999824	-4.24831
AL031123.5	-0.466462	-1.08048	-1.67853	0.0977743	0.999824	-4.48428
CBX1	-0.123783	5.14089	-1.67851	0.0977785	0.999824	-4.2382
TNFAIP1	-0.0860731	3.4114	-1.67839	0.0978026	0.999824	-4.25598
ZNF467	-0.275023	6.14325	-1.67819	0.0978424	0.999824	-4.24195
CHST5	0.507094	-1.19342	1.67803	0.0978735	0.999824	-4.49316
MUSTN1	1.35467	-3.23512	1.67796	0.0978868	0.999824	-4.55625
CFDP1	-0.198209	3.12903	-1.67794	0.0978908	0.999824	-4.26627
SLC16A5	-0.187021	4.20403	-1.6779	0.0978976	0.999824	-4.24264
AC007192.1	-0.462259	2.10937	-1.67772	0.0979329	0.999824	-4.31259
AC012645.1	-0.31799	2.85622	-1.67772	0.0979331	0.999824	-4.2722
ODF2	0.12607	4.36694	1.67765	0.0979474	0.999824	-4.24087
AC090398.2	0.249787	0.146429	1.67635	0.0982021	0.999824	-4.41888
TOR1AIP1	-0.147077	5.92783	-1.67632	0.0982098	0.999824	-4.24305
RELN	0.73307	-2.76823	1.67627	0.0982182	0.999824	-4.54581
DNAJC3-DT	-0.264747	1.4107	-1.67613	0.0982469	0.999824	-4.3492
AC009975.2	-0.731092	-2.7275	-1.67575	0.0983217	0.999824	-4.54585
AC022532.1	-0.391614	-1.08809	-1.67551	0.0983675	0.999824	-4.48771
IGKV2D-30	0.877363	-2.7285	1.67522	0.0984244	0.999824	-4.53653
AC073585.1	-0.359364	-1.53171	-1.67494	0.0984798	0.999824	-4.50523
AL008582.1	-0.472001	-1.8364	-1.67493	0.0984827	0.999824	-4.52108
KRT23	-0.479651	5.85417	-1.67449	0.0985691	0.999824	-4.24374
AP002358.1	0.32953	-1.33231	1.67448	0.0985718	0.999824	-4.48856
HSD3B7	-0.34331	0.711123	-1.67394	0.0986785	0.999824	-4.39701
AC116562.4	-0.435125	-1.03512	-1.67392	0.0986811	0.999824	-4.48614
PPP2R3C	-0.251144	4.30006	-1.6732	0.0988239	0.999824	-4.2454
AC021106.1	-0.289016	0.451018	-1.67287	0.0988899	0.999824	-4.40526
AC139495.3	-0.49011	5.59536	-1.67275	0.0989124	0.999824	-4.24516
PPFIA1	-0.161492	4.87466	-1.67266	0.0989306	0.999824	-4.24315
SNX29P2	0.328951	1.68435	1.67249	0.098965	0.999824	-4.31604
MAP2K6	-0.177232	3.70292	-1.67247	0.0989673	0.999824	-4.25547
AL645939.1	-0.298661	1.20509	-1.67207	0.099047	0.999824	-4.3656
CDAN1	0.123619	3.25897	1.67195	0.0990718	0.999824	-4.26545
SLC4A1AP	-0.117842	4.26576	-1.6715	0.0991607	0.999824	-4.24728
PGAP3	0.143017	3.88945	1.67108	0.099244	0.999824	-4.25202
VPREB3	0.44534	1.83084	1.67098	0.0992637	0.999824	-4.30893
LPAR2	-0.24843	6.19585	-1.67068	0.0993237	0.999824	-4.24863
PLSCR1	-0.323014	4.93681	-1.67041	0.0993764	0.999824	-4.24507
NEDD8	-0.149869	5.23867	-1.67032	0.0993946	0.999824	-4.24508
WBP1L	-0.122739	5.87994	-1.67028	0.0994017	0.999824	-4.24768
ST6GALNAC2	-0.299826	4.48492	-1.67008	0.0994413	0.999824	-4.24679
NEURL4	0.107865	4.54248	1.66887	0.0996828	0.999824	-4.24747
NAIP	-0.293048	6.65605	-1.6685	0.0997569	0.999824	-4.2544
INSC	-0.632946	-1.32945	-1.66844	0.0997682	0.999824	-4.51054
CELF5	0.595973	-1.47049	1.66748	0.0999585	0.999824	-4.5095
AC000095.3	-0.43493	0.276331	-1.66719	0.100018	0.999824	-4.43237
PLEKHO2	-0.241342	7.27541	-1.66712	0.100031	0.999824	-4.26073
TLR4	-0.279527	6.98066	-1.66599	0.100257	0.999824	-4.25961
B4GALT5	-0.284359	6.05585	-1.66592	0.10027	0.999824	-4.25236
METRN	0.184719	1.64439	1.66491	0.100472	0.999824	-4.3407
TMC6	0.131357	7.31494	1.66419	0.100617	0.999824	-4.26396
LDLRAD3	-0.249609	0.963973	-1.66408	0.10064	0.999824	-4.378
LINC01139	0.389164	-0.910295	1.66397	0.100661	0.999824	-4.47513
AC016629.3	-0.512635	0.189874	-1.66395	0.100666	0.999824	-4.42643
PLXDC2	-0.220827	5.59818	-1.66355	0.100745	0.999824	-4.252
PHF7	0.201733	1.07543	1.66344	0.100768	0.999824	-4.37166
CYB561	0.194449	4.20889	1.6634	0.100777	0.999824	-4.25518
AC020765.4	-0.686475	-2.74278	-1.66337	0.100781	0.999824	-4.54771
FAM83H	-0.225718	1.2752	-1.66326	0.100804	0.999824	-4.36625
WLS	-0.431811	4.92473	-1.66326	0.100804	0.999824	-4.25104
CELSR1	0.491803	1.739	1.66302	0.100852	0.999824	-4.32858
DDX54	0.141836	5.19433	1.66281	0.100894	0.999824	-4.25162
MS4A1	0.438025	5.8118	1.66262	0.100932	0.999824	-4.25653
LRP10	-0.240886	8.58268	-1.66257	0.100943	0.999824	-4.2787
ACPP	-0.287881	3.27696	-1.66235	0.100988	0.999824	-4.27024
BBC3	-0.22187	4.27576	-1.66211	0.101035	0.999824	-4.25491
AC019097.1	0.83284	-2.17416	1.66195	0.101067	0.999824	-4.51953
ZNHIT2	0.177767	1.84948	1.66177	0.101103	0.999824	-4.33281
CXCR1	-0.349129	8.87774	-1.66158	0.101143	0.999824	-4.28224
PCDHGC3	-0.61445	-1.42704	-1.66145	0.101168	0.999824	-4.50327
ICOSLG	0.237572	3.49402	1.66091	0.101276	0.999824	-4.26386
C19orf38	-0.215656	5.55293	-1.66005	0.10145	0.999824	-4.25435
ZNF26	0.16694	3.80362	1.66005	0.101451	0.999824	-4.26162
AP000866.2	-0.53936	-1.85022	-1.65921	0.10162	0.999824	-4.52398
AC103563.7	-0.428812	-0.981289	-1.65892	0.101678	0.999824	-4.48871
PCSK7	0.133586	6.94669	1.65839	0.101785	0.999824	-4.26495
AC009961.4	-0.311601	0.32556	-1.65824	0.101816	0.999824	-4.4166
HMGCR	-0.196815	4.91954	-1.65801	0.101862	0.999824	-4.25539
AL138824.1	0.317591	0.19166	1.65791	0.101884	0.999824	-4.43325
CD300LB	-0.192928	5.21531	-1.65781	0.101903	0.999824	-4.2557
TM2D1	-0.144103	3.01159	-1.65773	0.10192	0.999824	-4.28167
CWC25	-0.110355	4.90809	-1.65755	0.101955	0.999824	-4.25586
PHLPP2	0.16835	2.28197	1.65729	0.10201	0.999824	-4.30627
AC092683.1	-0.19143	3.92671	-1.65686	0.102096	0.999824	-4.26206
MGST1	-0.266533	2.54885	-1.65664	0.10214	0.999824	-4.30284
AL021918.5	0.576293	-2.25896	1.65621	0.102229	0.999824	-4.53164
E2F3	-0.24067	4.49778	-1.65617	0.102236	0.999824	-4.25795
SEZ6	-0.273664	-0.772675	-1.65614	0.102242	0.999824	-4.47988
PIAS2	0.151936	3.25442	1.65601	0.102268	0.999824	-4.27622
Z97353.2	0.462527	-1.74962	1.65597	0.102276	0.999824	-4.52118
WDR26	-0.157626	6.7502	-1.65568	0.102335	0.999824	-4.26588
MAP3K9	0.192131	1.71406	1.65548	0.102377	0.999824	-4.33647
KPNA2	0.142285	3.22989	1.65526	0.102421	0.999824	-4.27764
HERC2P5	0.639295	-0.801605	1.65507	0.102461	0.999824	-4.47765
TXNRD1	-0.187174	5.68605	-1.6545	0.102575	0.999824	-4.26013
AC007952.7	0.456424	0.230485	1.65432	0.102612	0.999824	-4.42208
PGAP2	-0.118826	3.12907	-1.65403	0.102672	0.999824	-4.28308
SP140	0.17992	4.88536	1.65388	0.102702	0.999824	-4.25902
DIS3L2	0.114733	3.13491	1.65313	0.102855	0.999824	-4.28131
AC000367.1	-0.446968	-1.86717	-1.65267	0.102948	0.999824	-4.52537
PTGFR	-0.960903	-3.23739	-1.65255	0.102974	0.999824	-4.56068
CWF19L2	-0.186297	4.12151	-1.65247	0.10299	0.999824	-4.26482
POMP	-0.185466	3.66672	-1.65204	0.103078	0.999824	-4.27229
AC069224.1	0.5718	-2.65113	1.65201	0.103084	0.999824	-4.54193
AC015849.3	0.211935	0.848347	1.65177	0.103132	0.999824	-4.39658
CDC5L	-0.119022	4.62958	-1.65132	0.103224	0.999824	-4.26153
DCDC2B	-0.508074	-1.36401	-1.65119	0.103252	0.999824	-4.49916
MFSD4B	0.162352	4.21567	1.65105	0.103282	0.999824	-4.26435
UTS2	-0.846151	-2.69942	-1.6508	0.103332	0.999824	-4.54994
KCNJ2	-0.233132	6.37152	-1.65066	0.103361	0.999824	-4.26668
RALB	-0.244104	6.61169	-1.65005	0.103486	0.999824	-4.26888
ZNF595	0.291602	1.3713	1.64966	0.103566	0.999824	-4.36227
GBGT1	-0.251142	3.62864	-1.64928	0.103643	0.999824	-4.27401
AC080112.1	-0.397577	-0.998101	-1.64913	0.103674	0.999824	-4.4853
CFAP58-DT	-0.533141	-0.225034	-1.64899	0.103703	0.999824	-4.45973
HMGB3	-0.247466	0.514747	-1.64854	0.103797	0.999824	-4.41431
ZNF622	-0.119779	4.08147	-1.64834	0.103836	0.999824	-4.26849
ATP6V1A	-0.223438	5.99726	-1.64832	0.103842	0.999824	-4.2667
KBTBD2	-0.166293	5.31463	-1.64692	0.104129	0.999824	-4.26513
XPO6	-0.26356	8.84458	-1.64665	0.104185	0.999824	-4.29303
POLD1	0.12861	3.65748	1.64663	0.104189	0.999824	-4.27512
AC010442.1	0.173093	2.35354	1.64636	0.104246	0.999824	-4.31719
MEG3	-0.612027	0.0386915	-1.64618	0.104283	0.999824	-4.41805
USP35	-0.164819	2.39109	-1.64606	0.104306	0.999824	-4.31514
ZNF106	-0.154038	6.26301	-1.64556	0.104409	0.999824	-4.27049
RBMS1	-0.128465	6.20209	-1.64526	0.104472	0.999824	-4.27022
CHST15	-0.258877	7.32383	-1.64489	0.104548	0.999824	-4.27856
ADGRE1	-0.270384	4.55444	-1.64476	0.104575	0.999824	-4.26691
GABARAPL1	-0.21165	5.25847	-1.64444	0.104641	0.999824	-4.26679
ARL2	0.166784	3.48438	1.64432	0.104667	0.999824	-4.28179
PILRA	-0.27426	6.86703	-1.64371	0.104793	0.999824	-4.27559
MYL12A	-0.146867	7.71828	-1.64351	0.104834	0.999824	-4.28275
BPTFP1	-1.05243	-1.60527	-1.64329	0.104881	0.999824	-4.50225
AC243960.7	0.405938	-0.843016	1.64283	0.104976	0.999824	-4.48197
SLC7A9	0.524719	-1.85195	1.64278	0.104986	0.999824	-4.51957
AL079307.1	0.378041	-0.298494	1.6424	0.105065	0.999824	-4.46083
ZNF562	0.0894601	4.02424	1.64239	0.105068	0.999824	-4.2731
PTGIR	-0.201358	2.83403	-1.64237	0.10507	0.999824	-4.29979
TNFRSF10C	-0.326676	8.08309	-1.64158	0.105235	0.999824	-4.28925
LDHC	0.554472	-2.25937	1.64154	0.105243	0.999824	-4.53852
ELP5	0.110643	3.41799	1.64115	0.105325	0.999824	-4.28471
AP003108.2	0.184956	2.56122	1.64115	0.105325	0.999824	-4.31282
CTSD	-0.260648	8.34451	-1.64108	0.10534	0.999824	-4.29069
MIB2	0.141295	5.26921	1.64094	0.105369	0.999824	-4.26996
IDS	-0.20658	7.46936	-1.64045	0.105471	0.999824	-4.28406
SAMSN1	-0.28302	3.86804	-1.64022	0.105519	0.999824	-4.27796
COL4A4	0.420593	0.410392	1.63998	0.105569	0.999824	-4.40672
ALDH16A1	0.158903	4.9269	1.63971	0.105624	0.999824	-4.27078
TXNDC12	-0.208744	3.77861	-1.63916	0.105739	0.999824	-4.27997
CSGALNACT2	-0.224862	5.09289	-1.63898	0.105777	0.999824	-4.27128
TTC31	0.112421	4.12943	1.63883	0.105809	0.999824	-4.27506
MYCL	-0.222935	3.83751	-1.63875	0.105826	0.999824	-4.27761
TMEM59	-0.150036	6.20056	-1.63847	0.105885	0.999824	-4.27538
AC010680.2	-0.2506	0.901994	-1.638	0.105983	0.999824	-4.39823
UCN	-0.32228	-1.08308	-1.63798	0.105986	0.999824	-4.49711
GCHFR	0.229495	1.71694	1.6379	0.106003	0.999824	-4.35389
JADE3	0.323689	0.0302392	1.63774	0.106037	0.999824	-4.44047
XYLT2	0.114325	4.07241	1.63755	0.106076	0.999824	-4.27731
JAG1	-0.250757	0.715475	-1.63729	0.106132	0.999824	-4.4061
ABCB8	0.109266	3.85633	1.63722	0.106145	0.999824	-4.27961
AC129510.1	-0.345924	-0.802814	-1.6372	0.106149	0.999824	-4.48552
DGCR2	-0.169347	6.6779	-1.63711	0.106169	0.999824	-4.27963
AC020917.4	-0.214001	2.48912	-1.6371	0.106171	0.999824	-4.31948
GUCY2C	-0.448023	-1.93491	-1.63709	0.106172	0.999824	-4.52858
AC012313.3	0.294524	0.575614	1.63707	0.106176	0.999824	-4.42127
AC009093.2	0.327995	-0.603842	1.63688	0.106217	0.999824	-4.47107
AC104162.1	-0.416979	-1.52135	-1.63624	0.106351	0.999824	-4.51759
SLC19A1	-0.280806	6.06565	-1.63621	0.106356	0.999824	-4.27648
AL034397.3	-0.276112	6.97925	-1.63615	0.10637	0.999824	-4.28226
MZF1-AS1	0.232759	0.662499	1.63593	0.106416	0.999824	-4.40901
AP000766.1	0.272103	0.251446	1.63582	0.106439	0.999824	-4.42728
IFNG-AS1	0.580348	-1.10113	1.63564	0.106477	0.999824	-4.49833
BMPR1A	0.209186	1.87902	1.63523	0.106562	0.999824	-4.34375
LAMA5	0.406966	1.45036	1.63499	0.106613	0.999824	-4.3498
ZDHHC3	-0.113351	5.4171	-1.63491	0.106631	0.999824	-4.27506
FLCN	-0.110204	5.3785	-1.63398	0.106825	0.999824	-4.27571
TRIB1	-0.302947	4.17505	-1.63394	0.106833	0.999824	-4.27855
DBT	0.122403	3.35421	1.6335	0.106926	0.999824	-4.29014
ZMYND15	-0.348811	1.04107	-1.63348	0.106931	0.999824	-4.40101
AC090607.2	0.402145	-1.44787	1.63314	0.107002	0.999824	-4.50803
CRNKL1	-0.120586	4.63229	-1.63307	0.107017	0.999824	-4.27671
TDRD9	-0.407777	1.48277	-1.63295	0.107043	0.999824	-4.38184
NLRP3	-0.243151	4.35202	-1.63242	0.107154	0.999824	-4.27804
UCKL1-AS1	0.242068	0.475005	1.63137	0.107377	0.999824	-4.42084
IGHV3OR16-8	-0.969701	-2.93753	-1.63109	0.107435	0.999824	-4.55065
IMPDH1	-0.230602	7.4023	-1.63103	0.107449	0.999824	-4.28971
PINK1-AS	0.177027	2.53774	1.63072	0.107515	0.999824	-4.31903
KIFC2	0.172732	4.07183	1.63034	0.107594	0.999824	-4.28265
AC090192.2	0.380055	-1.05684	1.63031	0.107601	0.999824	-4.49601
KCNH3	-0.298421	2.56318	-1.62954	0.107763	0.999824	-4.32032
AC097375.3	0.330374	-0.225863	1.62931	0.107813	0.999824	-4.46418
AC010463.3	-0.483751	-1.89607	-1.62917	0.107843	0.999824	-4.52553
DYRK4	0.220379	1.76558	1.62905	0.107867	0.999824	-4.35222
AC012645.4	-0.368594	1.01406	-1.62887	0.107905	0.999824	-4.40162
SPATA21	0.507685	-2.45892	1.62887	0.107907	0.999824	-4.53924
GLRA1	-0.59131	-1.87836	-1.62846	0.107993	0.999824	-4.53106
CEMIP	-0.297401	-0.392765	-1.62832	0.108022	0.999824	-4.47116
LCTL	0.404059	-1.22761	1.62805	0.10808	0.999824	-4.50253
ACTN1	-0.313603	7.8881	-1.62771	0.108153	0.999824	-4.29689
ZNF280C	0.220659	0.722209	1.6277	0.108155	0.999824	-4.40101
AC091564.1	-0.558828	-2.14467	-1.62764	0.108167	0.999824	-4.53437
ZMIZ1-AS1	-0.505592	-1.92112	-1.62756	0.108184	0.999824	-4.53014
SRP54	-0.108196	4.62688	-1.62741	0.108217	0.999824	-4.28142
MIDN	-0.211104	6.88284	-1.62713	0.108275	0.999824	-4.28895
SYNE4	0.316334	-0.557912	1.62699	0.108305	0.999824	-4.47777
ZNF578	0.178619	1.76152	1.62678	0.108351	0.999824	-4.3552
TBL1X	-0.240451	6.11987	-1.62673	0.108362	0.999824	-4.28451
ZSCAN2	0.181254	2.16146	1.62668	0.108371	0.999824	-4.33487
ZNF839	-0.122093	3.67294	-1.62655	0.108399	0.999824	-4.29066
ZNF48	0.139487	2.39515	1.62655	0.1084	0.999824	-4.32748
A2ML1	0.549415	-2.13844	1.62611	0.108494	0.999824	-4.53197
CALM2	-0.178701	7.76388	-1.62606	0.108504	0.999824	-4.29674
AL136129.1	-0.440995	-2.01661	-1.62572	0.108575	0.999824	-4.53025
PIAS1	-0.156882	5.98294	-1.62565	0.10859	0.999824	-4.28499
POU5F1P3	-0.309963	0.468083	-1.62555	0.108613	0.999824	-4.4233
SMIM20	0.260037	1.28444	1.62552	0.108618	0.999824	-4.3789
ASIC3	0.284971	0.00743106	1.62542	0.10864	0.999824	-4.45095
VASH2	0.392739	-0.894107	1.62542	0.108641	0.999824	-4.4848
FRAT1	-0.254491	6.43159	-1.62528	0.108669	0.999824	-4.28737
PKNOX1	-0.124731	3.66223	-1.62519	0.108689	0.999824	-4.29171
RTN4RL2	0.694193	-2.72033	1.62485	0.108762	0.999824	-4.54722
LOXL1	-0.421523	-0.992067	-1.62436	0.108865	0.999824	-4.49967
LINC01973	-0.720288	-2.456	-1.6243	0.108879	0.999824	-4.54493
NLRX1	-0.227072	4.3949	-1.62402	0.10894	0.999824	-4.28532
ARIH2	0.092565	5.52472	1.62367	0.109014	0.999824	-4.28477
MZF1	0.126457	4.05786	1.62356	0.109037	0.999824	-4.28786
SYBU	0.447988	-1.80994	1.62349	0.109052	0.999824	-4.5116
AJ003147.3	-0.177358	1.51107	-1.62347	0.109056	0.999824	-4.36963
SEMA3C	-0.23927	1.3694	-1.62291	0.109176	0.999824	-4.37138
ZNF785	0.126736	3.27388	1.62263	0.109236	0.999824	-4.30064
RASSF6	0.405282	-0.54994	1.62252	0.109261	0.999824	-4.46511
AC098657.2	-0.546108	-2.29636	-1.62246	0.109272	0.999824	-4.53721
AC092447.5	0.557652	-1.52166	1.62224	0.10932	0.999824	-4.51474
MNT	-0.143103	5.07506	-1.62148	0.109484	0.999824	-4.28569
ZCCHC9	-0.146668	3.09134	-1.62142	0.109497	0.999824	-4.30704
GOLGA8K	-0.550209	-1.07633	-1.6214	0.109502	0.999824	-4.49275
CCDC6	0.151297	3.75328	1.62128	0.109527	0.999824	-4.29248
GRIN2A	0.825237	-2.60557	1.62122	0.10954	0.999824	-4.55271
KHDC1	0.332031	-0.619394	1.62121	0.109542	0.999824	-4.47509
AC104066.2	-0.518886	-2.15623	-1.62064	0.109664	0.999824	-4.5398
GYG1	-0.186398	4.9085	-1.62033	0.10973	0.999824	-4.28669
MTG1	0.18701	3.73957	1.61987	0.10983	0.999824	-4.29513
NECTIN4	0.707143	-2.50565	1.61977	0.109852	0.999824	-4.54322
FER1L4	-0.467023	-1.55363	-1.61969	0.109868	0.999824	-4.51895
AC017035.1	-0.433075	-1.02657	-1.61925	0.109964	0.999824	-4.50359
ANGPT4	-0.479109	-1.85794	-1.61915	0.109985	0.999824	-4.5255
AF127936.2	0.469805	-1.99769	1.61903	0.110012	0.999824	-4.52555
CHMP1B	-0.167383	6.0484	-1.61894	0.110029	0.999824	-4.29063
AC087721.2	-1.21526	-2.56386	-1.61893	0.110031	0.999824	-4.53835
RAP1A	-0.148184	6.44554	-1.61876	0.110069	0.999824	-4.29282
HPSE	-0.268775	4.79593	-1.61828	0.110172	0.999824	-4.28845
C1S	0.359188	-1.0529	1.61735	0.110373	0.999824	-4.50069
AC093278.2	0.914035	-2.06753	1.61734	0.110376	0.999824	-4.53787
LRP5	0.3133	-0.0231259	1.61733	0.110378	0.999824	-4.44331
PMVK	0.159169	3.49658	1.61715	0.110417	0.999824	-4.30177
AC127024.4	0.397102	-1.80621	1.61705	0.110437	0.999824	-4.52804
LINC01004	-0.312298	0.0206979	-1.61681	0.11049	0.999824	-4.44334
ASPH	-0.289302	3.59356	-1.61676	0.1105	0.999824	-4.29941
B3GNT5	-0.321089	2.8725	-1.61598	0.110671	0.999824	-4.31671
AC093690.1	-0.405747	-0.520794	-1.61571	0.110728	0.999824	-4.47147
MAP4K4	-0.178233	7.21026	-1.61516	0.110846	0.999824	-4.30093
ASPSCR1	0.131817	4.10544	1.61473	0.11094	0.999824	-4.29501
NABP1	-0.267369	6.63829	-1.61463	0.110963	0.999824	-4.29713
CRB1	0.523734	-1.28474	1.61446	0.110998	0.999824	-4.51283
MEX3D	0.235288	1.17974	1.6143	0.111034	0.999824	-4.38927
CMTM6	-0.20373	7.52392	-1.61422	0.111052	0.999824	-4.30429
NAT9	0.119712	3.88928	1.61375	0.111154	0.999824	-4.29781
AC132872.1	-0.181035	2.08281	-1.61363	0.11118	0.999824	-4.35303
NPIPA7	0.223365	2.13741	1.6136	0.111187	0.999824	-4.34505
MADCAM1	-0.408373	-0.0814342	-1.61357	0.111193	0.999824	-4.46236
ABHD16A	-0.129445	5.04559	-1.61335	0.111242	0.999824	-4.29235
AC133919.3	-0.837137	-1.84603	-1.61287	0.111345	0.999824	-4.52455
NPAP1	-0.39657	-1.30981	-1.61275	0.111372	0.999824	-4.51277
PSPN	0.164773	1.158	1.61274	0.111373	0.999824	-4.39447
TNFRSF9	-0.250121	2.94852	-1.61212	0.111508	0.999824	-4.31462
STXBP3	-0.178027	5.27231	-1.61211	0.111511	0.999824	-4.29363
ECI2	0.118538	3.57376	1.61186	0.111565	0.999824	-4.3032
IFNGR1	-0.240673	6.65275	-1.61185	0.111567	0.999824	-4.29951
RP2	-0.257709	4.89569	-1.61181	0.111575	0.999824	-4.2936
SVOP	0.486158	-1.58716	1.61146	0.111653	0.999824	-4.52326
SNX27	-0.170748	6.13318	-1.61142	0.111661	0.999824	-4.29679
CA4	-0.455935	3.40149	-1.61127	0.111694	0.999824	-4.31152
RRP12	-0.279441	5.75888	-1.6111	0.111732	0.999824	-4.29579
VNN2	-0.414665	8.3408	-1.61109	0.111734	0.999824	-4.31334
LATS2	-0.203073	3.33495	-1.61096	0.111762	0.999824	-4.30703
SCLT1	-0.177833	4.16807	-1.61089	0.111777	0.999824	-4.29721
FLJ45513	-0.29856	0.344035	-1.61088	0.11178	0.999824	-4.44663
HSPA1A	-0.310988	7.78201	-1.61039	0.111885	0.999824	-4.30908
TMEM252	-0.418806	-0.0806115	-1.61033	0.111898	0.999824	-4.45072
KCNH7	-0.390308	0.11875	-1.61033	0.1119	0.999824	-4.44701
PELI1	-0.259963	6.3912	-1.60997	0.111978	0.999824	-4.2999
RNFT2	0.260823	1.36155	1.60993	0.111987	0.999824	-4.38337
SDHD	-0.10847	5.23157	-1.60993	0.111988	0.999824	-4.29527
AC007106.1	-0.495772	-1.81217	-1.60986	0.112002	0.999824	-4.52914
ZNF587B	0.125611	3.41298	1.60945	0.112093	0.999824	-4.30696
CD40	0.23404	3.02815	1.60921	0.112145	0.999824	-4.31255
AC008938.1	0.359283	-0.260154	1.60912	0.112163	0.999824	-4.46983
TCEA3	-0.300284	1.9106	-1.60867	0.112262	0.999824	-4.36681
RPS5	0.2334	7.64244	1.6086	0.112278	0.999824	-4.30868
FARS2	0.156688	2.15692	1.60845	0.11231	0.999824	-4.3499
CNN2P9	-0.410109	-1.24274	-1.6083	0.112344	0.999824	-4.50492
UBN1	-0.24417	7.02475	-1.60764	0.112489	0.999824	-4.3049
AC098934.2	0.500807	-1.46036	1.60732	0.112558	0.999824	-4.51815
AL355377.2	-0.615486	-2.72754	-1.6067	0.112694	0.999824	-4.55293
DIABLO	0.120111	3.96278	1.6066	0.112718	0.999824	-4.30279
GLA	-0.160393	3.52908	-1.60638	0.112765	0.999824	-4.30924
CMTM4	-0.216423	1.74944	-1.60618	0.11281	0.999824	-4.3655
KLHL21	-0.201841	6.50031	-1.60615	0.112815	0.999824	-4.30279
AC010226.1	-0.334075	-1.2266	-1.6057	0.112915	0.999824	-4.50513
CD14	-0.294866	7.62942	-1.60524	0.113017	0.999824	-4.31152
GNL1	0.111164	4.56232	1.60505	0.113058	0.999824	-4.29982
AC022144.1	0.276933	-0.192684	1.60494	0.113083	0.999824	-4.46306
KDM6B	-0.276349	7.50972	-1.60454	0.11317	0.999824	-4.31104
TTYH1	0.3456	-0.754229	1.60415	0.113257	0.999824	-4.49139
FOXP1-AS1	0.551264	-2.00082	1.60353	0.113394	0.999824	-4.53176
MAN2B2	-0.101106	5.84736	-1.60352	0.113395	0.999824	-4.30192
GGA2	0.167565	5.90416	1.60346	0.11341	0.999824	-4.30291
ZNF829	0.202728	1.21348	1.60344	0.113413	0.999824	-4.39001
SIRPB1	-0.300925	6.90652	-1.6032	0.113466	0.999824	-4.30819
PAXX	0.173418	4.26591	1.60314	0.11348	0.999824	-4.30286
AC016042.1	0.489803	-1.18282	1.60272	0.113573	0.999824	-4.50317
TBRG4	0.103571	4.60398	1.60255	0.113611	0.999824	-4.3018
MIF4GD	0.122626	3.80188	1.60239	0.113645	0.999824	-4.30765
AC012636.1	-0.286177	0.603955	-1.60236	0.113651	0.999824	-4.42796
ZNF891	0.219838	2.43871	1.60186	0.113763	0.999824	-4.33864
AL117344.2	-0.345271	-0.763667	-1.60171	0.113796	0.999824	-4.48676
AAGAB	-0.104494	4.00989	-1.60168	0.113804	0.999824	-4.3057
MXD3	-0.201583	4.37856	-1.60142	0.113859	0.999824	-4.30375
AL031600.3	2.02565	-3.37007	1.60125	0.113898	0.999824	-4.56715
AD000671.2	-0.916928	-1.05243	-1.60124	0.113901	0.999824	-4.49688
YTHDC1	-0.103447	5.93	-1.60121	0.113907	0.999824	-4.30433
AL354798.1	-0.232375	1.84229	-1.60117	0.113916	0.999824	-4.36534
CALY	0.586572	-2.46392	1.60113	0.113924	0.999824	-4.54637
SDR39U1	0.149566	4.44433	1.6011	0.113932	0.999824	-4.30369
AL391832.1	-0.606509	-1.75028	-1.60105	0.113942	0.999824	-4.52641
LRP12	0.299758	0.240889	1.60066	0.114029	0.999824	-4.44395
POLE	0.1366	4.19426	1.60034	0.114099	0.999824	-4.30543
S100A6	-0.230698	7.71867	-1.60023	0.114124	0.999824	-4.31515
ZNF688	0.120222	3.54511	1.60013	0.114146	0.999824	-4.31288
PRPF38A	-0.0873996	4.92047	-1.60001	0.114174	0.999824	-4.30324
PNRC1	-0.182052	7.55528	-1.5999	0.114198	0.999824	-4.31515
AC026979.4	0.229586	0.303849	1.59971	0.114239	0.999824	-4.44335
FAM184A	-0.384946	-0.553987	-1.59904	0.114389	0.999824	-4.4838
KNDC1	-0.545011	-0.473007	-1.59889	0.114421	0.999824	-4.47055
AC127459.2	-0.446311	-1.54207	-1.59881	0.114439	0.999824	-4.5301
PDCD7	0.110017	3.93353	1.59853	0.114503	0.999824	-4.30883
METTL7A	0.162552	5.40103	1.59838	0.114535	0.999824	-4.30516
ATL1	0.330841	-0.0723832	1.59833	0.114546	0.999824	-4.45137
LINC02035	-0.211314	3.98595	-1.59828	0.114558	0.999824	-4.30882
TRHDE	0.687132	-2.09744	1.59823	0.11457	0.999824	-4.54125
PLXNB3	-0.752419	-2.28509	-1.59797	0.114627	0.999824	-4.54595
[truncated: 19,445 more rows]
