# Supplementary material for: Molecular Profiling of Axial Spondyloarthritis Patients Reveals an Association between Innate and Adaptive Cell Populations and Therapeutic Response to Tumor Necrosis Factor Inhibitors
Source: Biomolecules. 2024 Mar 21;14(3):382. doi: 10.3390/biom14030382 (PMC10967957; doi:10.3390/biom14030382)
Supplement: Supplementary file 1 [file biomolecules-14-00382-s001.zip › SuppTable10.xlsx]

## Sheet: Transcriptomics BL
logfc: Log2 of the Fold change
AveExpr: Log2 of the average normalized expression CPM among all samples
t: t-statistic of the differential expression test
P.value: p value of the differential expression test
adj.P.Val: p-value correctedfor multiple testing
B: B-statistic (log-odds that the gene is differentially expressed)
	logFC	AveExpr	t	P.Value	adj.P.Val	B
AFF3	-0.916816	2.7049	-6.25456	3.42319e-07	0.00639727	6.35722
BANK1	-1.03254	4.11596	-5.99472	7.54925e-07	0.00705402	5.79081
SAV1	-0.521778	2.27352	-5.20514	8.39555e-06	0.0223571	3.47471
CCR6	-0.70921	3.15547	-5.18318	8.97607e-06	0.0223571	3.49143
RAB30	-0.782525	2.63834	-5.17973	9.07087e-06	0.0223571	3.44164
PAX5	-1.14242	3.63992	-5.14546	1.00676e-05	0.0223571	3.40205
FCRLA	-1.14613	3.02855	-5.07518	1.24654e-05	0.0223571	3.18118
SLC9A7	-0.490018	3.02465	-5.06774	1.27503e-05	0.0223571	3.16927
FCRL2	-1.12348	2.84348	-5.06497	1.28582e-05	0.0223571	3.14097
EBF1	-0.94067	0.847985	-5.04603	1.36194e-05	0.0223571	2.72989
MS4A1	-1.21326	5.32815	-5.04448	1.36837e-05	0.0223571	3.13472
ZCCHC7	-0.463223	3.18203	-5.02868	1.4356e-05	0.0223571	3.0693
PTPRK	-0.909462	0.286824	-4.90912	2.06265e-05	0.0296513	2.18766
RIPK3	0.297248	4.39033	4.84916	2.47281e-05	0.0330085	2.58767
DNAJC10	-0.394965	4.73879	-4.7653	3.18512e-05	0.0389949	2.35337
RALGPS2	-0.79368	4.14369	-4.74968	3.33861e-05	0.0389949	2.31124
SEL1L3	-0.560363	4.81886	-4.67734	4.15079e-05	0.0394872	2.10859
TMEM19	-0.348109	3.45738	-4.66805	4.26831e-05	0.0394872	2.08456
SNX29P2	-0.833757	1.38168	-4.66595	4.29539e-05	0.0394872	1.91538
P2RY10	-0.577226	4.35984	-4.64887	4.52149e-05	0.0394872	2.0312
ADCY4	0.556274	2.61881	4.59981	5.23859e-05	0.0394872	1.88334
BLNK	-0.774667	2.44447	-4.5969	5.28437e-05	0.0394872	1.86005
CR2	-0.847017	1.55449	-4.55673	5.95996e-05	0.0394872	1.66441
SWAP70	-0.657139	4.37265	-4.55639	5.96603e-05	0.0394872	1.77584
FCRL1	-1.10075	3.37979	-4.54447	6.18276e-05	0.0394872	1.74532
ZNF365	-1.2903	-0.883824	-4.53552	6.35048e-05	0.0394872	0.787167
ELP2	-0.304646	4.27612	-4.53494	6.36145e-05	0.0394872	1.71655
ZNF772	-0.697017	0.891008	-4.53025	6.45118e-05	0.0394872	1.4801
AC063949.2	-2.07083	-0.977441	-4.53001	6.45595e-05	0.0394872	0.633649
CYB5R1	0.35808	4.45348	4.52625	6.52884e-05	0.0394872	1.69059
ATL2	-0.391986	2.99644	-4.52516	6.55021e-05	0.0394872	1.6904
C1orf162	0.360228	5.7048	4.46793	7.77048e-05	0.0439719	1.52823
CCDC50	-0.636284	3.59252	-4.46096	7.93357e-05	0.0439719	1.51903
TCL6	-0.933798	1.82167	-4.45816	8.00002e-05	0.0439719	1.44366
CD19	-0.995078	3.08746	-4.43416	8.59266e-05	0.0458799	1.44494
TMEM222	0.267996	4.72428	4.41501	9.09668e-05	0.0468306	1.38274
NPM1P25	-1.08555	-1.32513	-4.39838	9.55757e-05	0.0468306	0.311456
BIRC3	-0.671355	5.48709	-4.37471	0.000102537	0.0468306	1.27272
PHYKPL	0.244482	5.53085	4.36639	0.000105101	0.0468306	1.24866
VPS9D1	0.397654	4.65606	4.36399	0.00010585	0.0468306	1.24319
THNSL1	-0.517615	1.10061	-4.35992	0.000107136	0.0468306	1.10659
OSBPL10	-1.04999	1.97313	-4.35837	0.000107631	0.0468306	1.19745
ZBTB10	-0.68309	1.44216	-4.34318	0.000112589	0.0468306	1.11104
PDCD4	-0.267375	6.58675	-4.34042	0.000113513	0.0468306	1.18433
TCL1A	-1.15708	3.96307	-4.34027	0.000113564	0.0468306	1.18985
DMXL1	-0.583054	3.29981	-4.33146	0.000116566	0.0468306	1.17009
LINC00926	-0.793624	4.6009	-4.32183	0.000119938	0.0468306	1.13151
AL139020.1	-1.06813	0.701454	-4.32086	0.000120284	0.0468306	0.91734
NTNG2	0.628895	5.41671	4.31207	0.000123453	0.0470534	1.09971
RERE-AS1	0.514289	1.46346	4.30546	0.000125892	0.0470534	1.03201
CD79B	-0.750177	5.12152	-4.28866	0.0001323	0.0484788	1.03794
RRAS2	-0.650035	2.26586	-4.27146	0.000139197	0.0486961	0.995311
ZNF35	-0.485593	0.536438	-4.26849	0.000140422	0.0486961	0.775104
AC040162.1	0.34045	4.06184	4.26779	0.00014071	0.0486961	0.987431
HSDL1	-0.473032	2.94026	-4.25473	0.000146238	0.0489138	0.965551
STRBP	-0.58637	2.80455	-4.24945	0.000148536	0.0489138	0.95079
ZNF227	-0.300641	3.02533	-4.24469	0.000150634	0.0489138	0.93881
NIBAN3	-0.777565	4.99563	-4.21399	0.000164891	0.0489138	0.835595
ZNF420	-0.483922	1.56916	-4.21062	0.000166533	0.0489138	0.795021
MIR600HG	-0.772777	2.79845	-4.20153	0.000171044	0.0489138	0.823997
AL117692.1	0.866915	-1.61149	4.19902	0.000172314	0.0489138	-0.139327
AGL	-0.609677	2.80622	-4.19735	0.000173159	0.0489138	0.813234
ATG4C	-0.441181	2.1842	-4.19723	0.000173223	0.0489138	0.800868
NCK1	-0.291776	3.59559	-4.1908	0.000176528	0.0489138	0.788656
SMC6	-0.509207	3.2955	-4.17657	0.000184064	0.0489138	0.755673
HDAC9	-0.6913	2.82579	-4.16641	0.000189632	0.0489138	0.731789
PLIN4	0.595387	4.23881	4.1631	0.000191483	0.0489138	0.701672
BMI1	-0.574985	3.76892	-4.15899	0.000193805	0.0489138	0.701587
ZBTB21	-0.485104	2.43327	-4.15724	0.000194806	0.0489138	0.704113
BEND4	-0.938399	-0.609248	-4.15615	0.00019543	0.0489138	0.152109
HLA-DOA	-0.584567	4.33027	-4.15583	0.000195609	0.0489138	0.683755
CD180	-0.642765	3.57691	-4.15296	0.000197264	0.0489138	0.689126
XPOT	-0.312822	4.32734	-4.15234	0.000197626	0.0489138	0.673089
CTSA	0.467278	6.59252	4.15102	0.000198389	0.0489138	0.671497
CCDC91	-0.342075	2.89379	-4.14877	0.0001997	0.0489138	0.68527
AC083862.2	0.599095	1.70273	4.13633	0.000207114	0.0489138	0.624206
UTP23	-0.36076	2.93934	-4.13461	0.000208161	0.0489138	0.647764
CHD9	-0.507848	3.47524	-4.1278	0.000212352	0.0489138	0.623269
NR1D2	-0.540454	3.58495	-4.12448	0.000214428	0.0489138	0.612563
CD22	-0.806508	5.03366	-4.12287	0.000215438	0.0489138	0.589431
TSPAN13	-0.873457	1.82849	-4.12284	0.000215459	0.0489138	0.588301
NBEAL2	0.355655	8.59825	4.11855	0.000218182	0.0489138	0.602561
ZNF140	-0.333693	2.72615	-4.11417	0.000220996	0.0489138	0.594698
PAWR	-0.665325	1.09387	-4.10938	0.000224114	0.0489138	0.487167
TNFRSF14	0.239596	6.94353	4.10405	0.000227634	0.0489138	0.549213
CDCA7L	-0.686527	3.03458	-4.09946	0.000230706	0.0489138	0.554908
SLC39A6	-0.374015	3.435	-4.09713	0.00023228	0.0489138	0.541972
QRSL1	-0.419298	3.02671	-4.09704	0.000232345	0.0489138	0.548118
C17orf80	-0.404291	2.75358	-4.09615	0.000232948	0.0489138	0.547546
ZFP3	-0.513381	2.03713	-4.09122	0.000236328	0.0490722	0.522153
FAM3C	-0.540748	2.90128	-4.08707	0.000239205	0.0491237	0.523276
DLG1	-0.252607	4.0335	-4.07978	0.000244356	0.0496362	0.48315
WDR11	-0.409869	4.72144	-4.07014	0.00025132	0.0505018	0.447921
BCL11A	-0.444775	3.41658	-4.04476	0.000270611	0.0529141	0.40384
ICOSLG	-0.521064	3.2101	-4.03965	0.000274666	0.0529141	0.394673
ZDHHC21	-0.747101	1.76987	-4.03329	0.0002798	0.0529141	0.360281
TNFRSF13C	-0.861867	3.88852	-4.03263	0.00028034	0.0529141	0.363987
IFITM1	0.510454	7.86594	4.02829	0.000283901	0.0529141	0.357862
COBLL1	-0.845278	1.45859	-4.02583	0.00028594	0.0529141	0.318175
FAM238A	0.533704	-0.102411	4.02521	0.000286455	0.0529141	0.0769517
CENPC	-0.313303	3.4173	-4.02509	0.000286555	0.0529141	0.351482
AC091057.3	-1.50258	-1.07134	-4.01862	0.000291997	0.0529141	-0.35161
COG6	-0.492733	2.344	-4.01782	0.000292671	0.0529141	0.342263
SEPTIN7	-0.250838	6.50403	-4.01112	0.000298427	0.0529141	0.296171
CEP44	-0.44042	2.32084	-4.00668	0.000302301	0.0529141	0.313518
C1QTNF3	-0.53715	0.236905	-4.00619	0.000302727	0.0529141	0.0948846
PLEKHG1	-0.776781	1.54543	-4.00163	0.000306765	0.0529141	0.267072
AC079414.2	0.600732	1.69012	3.99293	0.000314606	0.0529141	0.261834
EIF2AK3	-0.4569	3.02797	-3.99069	0.000316661	0.0529141	0.269417
HNRNPA3P2	0.770043	-1.34873	3.98928	0.000317961	0.0529141	-0.422248
TPD52	-0.569516	3.14455	-3.9806	0.000326065	0.0529141	0.241249
FARP2	-0.302224	2.77954	-3.97918	0.000327406	0.0529141	0.242606
CD79A	-0.812189	5.72717	-3.97806	0.000328471	0.0529141	0.20205
MIR3142HG	-0.745547	0.249473	-3.97656	0.000329903	0.0529141	0.0233856
PHOSPHO2	-0.991791	-1.79302	-3.97585	0.000330576	0.0529141	-0.689953
PALM2-AKAP2	-0.610994	3.32272	-3.97204	0.000334247	0.0529141	0.2153
ZIK1	-0.458012	1.45744	-3.96949	0.00033673	0.0529141	0.184614
ZFP69	-0.4853	1.27757	-3.9682	0.000337984	0.0529141	0.16563
AURKB	0.660948	0.193519	3.96238	0.00034373	0.0529141	0.0047206
DYNLT3	-0.577294	2.29347	-3.9582	0.000347914	0.0529141	0.188936
SELP	0.797684	2.26168	3.95759	0.000348531	0.0529141	0.188075
ZNF678	-0.563896	1.03813	-3.95741	0.000348708	0.0529141	0.114248
ALOX12	0.555126	2.9704	3.95637	0.000349766	0.0529141	0.179229
TRAF5	-0.433389	4.54445	-3.95272	0.000353479	0.0529141	0.13686
RABAC1	0.366894	5.17221	3.95227	0.000353931	0.0529141	0.128943
APOL4	0.530731	0.57943	3.93953	0.000367212	0.0540182	0.021521
LCN10	-0.897934	1.54754	-3.93762	0.000369243	0.0540182	0.10637
HLTF	-0.488917	2.43027	-3.93693	0.000369987	0.0540182	0.135628
CYP2U1	-0.504147	1.61971	-3.93383	0.00037331	0.0540807	0.106272
DDX18	-0.312097	4.94014	-3.92732	0.000380395	0.0546833	0.0649478
TRIO	-0.491903	3.46486	-3.92189	0.000386412	0.0550517	0.0800451
ZMAT5	0.307176	3.23392	3.91899	0.000389656	0.0550517	0.0757906
GOLGA4	-0.378687	4.56641	-3.91475	0.000394447	0.0550517	0.0356409
CCDC191	-0.477543	1.94396	-3.91449	0.000394741	0.0550517	0.0716751
SNX25	-0.596224	1.599	-3.90455	0.000406226	0.0559292	0.0319836
KLF8	-0.701284	1.81828	-3.90387	0.000407019	0.0559292	0.039851
TRIP11	-0.336454	3.63127	-3.89678	0.000415424	0.0566675	0.00892949
PDHX	-0.359059	2.13017	-3.89094	0.000422468	0.057006	0.016677
ZNF720	-0.322226	2.0738	-3.88948	0.000424249	0.057006	0.0122541
ENOPH1	-0.393346	2.67025	-3.88718	0.000427057	0.057006	0.00675887
RHBDD2	0.275685	4.68108	3.87876	0.000437533	0.0570169	-0.0630539
CORO2B	-1.2879	-0.490968	-3.87783	0.000438711	0.0570169	-0.409178
WDR27	-0.489801	2.19016	-3.87737	0.000439287	0.0570169	-0.0171185
SECTM1	0.513249	7.20822	3.87733	0.000439342	0.0570169	-0.0477739
SIAH1	-0.359412	3.26188	-3.87222	0.000445844	0.0573207	-0.0445508
NT5DC4	0.698851	-0.0059455	3.87068	0.000447818	0.0573207	-0.24479
ZNF528	-0.511485	2.34821	-3.86567	0.000454318	0.0574625	-0.0459174
ISG20	0.411973	6.23633	3.86434	0.000456053	0.0574625	-0.0958256
HTATSF1	-0.396389	4.25376	-3.86087	0.000460623	0.0574625	-0.10071
CHORDC1	-0.425373	3.51468	-3.85541	0.000467902	0.0574625	-0.0951904
GGA2	-0.361446	5.67169	-3.84982	0.000475467	0.0574625	-0.139063
BCL7A	-0.614429	2.307	-3.84874	0.000476948	0.0574625	-0.0888234
CIDEB	0.386537	4.83542	3.84772	0.000478341	0.0574625	-0.146408
WDR89	-0.573112	1.92045	-3.84507	0.000482001	0.0574625	-0.102916
TMEM64	-0.428255	2.34268	-3.8425	0.000485558	0.0574625	-0.10458
ZNF860	-1.30964	-0.578787	-3.84201	0.000486246	0.0574625	-0.513476
SMAD5	-0.493447	2.87253	-3.84169	0.000486685	0.0574625	-0.113157
WWP1	-0.419771	3.98999	-3.84134	0.000487178	0.0574625	-0.145381
PRKD3	-0.381802	3.97133	-3.83987	0.000489237	0.0574625	-0.149027
RBL1	-0.385217	2.38307	-3.83791	0.000491989	0.0574625	-0.116346
USP14	-0.333297	3.92012	-3.83575	0.000495048	0.0574625	-0.158725
PDE7B	-0.702154	-0.818163	-3.82247	0.00051425	0.0583701	-0.595521
DIAPH3	0.695073	0.45317	3.82233	0.000514452	0.0583701	-0.270342
PDS5A	-0.357294	5.18332	-3.82225	0.000514579	0.0583701	-0.212947
PRICKLE1	-0.824836	1.04386	-3.82106	0.000516322	0.0583701	-0.216533
AC098935.2	-1.09757	-1.57016	-3.81279	0.000528699	0.0583701	-0.899717
RDH14	-0.483975	1.45116	-3.81163	0.000530459	0.0583701	-0.203489
TRPM4	0.487278	2.71786	3.8115	0.000530645	0.0583701	-0.189226
ACBD3	-0.383249	4.00808	-3.80833	0.000535485	0.0583701	-0.232261
DENND5B	-0.764046	1.14288	-3.80705	0.000537443	0.0583701	-0.239114
AC025682.1	0.642596	-0.478599	3.80432	0.000541668	0.0583701	-0.503491
LARP4	-0.501249	2.62712	-3.80228	0.000544835	0.0583701	-0.209129
DARS	-0.322796	4.16142	-3.80225	0.000544878	0.0583701	-0.252486
CCT6A	-0.286471	5.18245	-3.79863	0.00055055	0.0583701	-0.275172
HLA-DOB	-0.734269	2.75149	-3.79746	0.000552381	0.0583701	-0.222773
ZNF559	-0.366811	2.82894	-3.79687	0.000553318	0.0583701	-0.22749
P2RX5	-0.647083	4.24341	-3.79563	0.000555285	0.0583701	-0.269324
SRFBP1	-0.44849	1.09429	-3.7924	0.000560434	0.0583701	-0.274437
FBXO6	0.496427	3.35459	3.79173	0.000561508	0.0583701	-0.258467
ZNF134	-0.261039	3.3186	-3.78933	0.000565361	0.0583701	-0.261331
ANAPC4	-0.336	3.53161	-3.78922	0.000565539	0.0583701	-0.268006
BLK	-0.815242	4.06456	-3.78742	0.000568459	0.0583701	-0.284999
MFSD6	-0.422655	3.45585	-3.77928	0.000581815	0.0584475	-0.290745
NCLN	0.27525	5.48763	3.7786	0.000582941	0.0584475	-0.328148
SRA1	0.38391	4.63151	3.77718	0.000585309	0.0584475	-0.329241
AEBP2	-0.409878	3.19024	-3.77518	0.000588658	0.0584475	-0.292847
CD72	-0.810645	2.9286	-3.77396	0.000590713	0.0584475	-0.286365
GPAM	-0.540717	1.12945	-3.7735	0.000591493	0.0584475	-0.31763
UBE3A	-0.360827	4.28035	-3.77215	0.000593774	0.0584475	-0.333498
ZFP14	-0.410879	2.51515	-3.7706	0.000596396	0.0584475	-0.287869
ZBTB24	-0.34265	3.30353	-3.76995	0.000597507	0.0584475	-0.310358
NAA15	-0.293682	3.77511	-3.7682	0.000600488	0.0584475	-0.330489
AC133644.2	-0.938417	-1.72235	-3.76578	0.000604644	0.0585471	-1.0315
ZNF92	-0.811642	1.74337	-3.76302	0.000609423	0.0587057	-0.311759
QSOX2	-0.454906	3.4905	-3.76081	0.000613277	0.0587626	-0.339269
TCN2	0.649032	1.97554	3.75908	0.000616303	0.0587626	-0.314462
USP51	-0.608019	-0.899884	-3.74956	0.000633228	0.059709	-0.763425
TLR10	-0.451602	3.29333	-3.74828	0.000635548	0.059709	-0.364928
FSD1L	-0.567305	0.7331	-3.74813	0.000635814	0.059709	-0.417182
GNG5	0.392836	5.38457	3.74539	0.000640796	0.0597128	-0.415368
ELAC1	-0.353034	0.956469	-3.7446	0.000642245	0.0597128	-0.398815
CD83	-0.709751	1.75652	-3.74073	0.000649338	0.0597354	-0.365412
PCM1	-0.306032	5.30073	-3.74062	0.000649543	0.0597354	-0.42656
FANCM	-0.755768	0.436638	-3.73925	0.000652077	0.0597354	-0.48232
LINC01531	0.558813	1.3516	3.73742	0.00065548	0.0597542	-0.384206
SEC23IP	-0.294781	4.08591	-3.73279	0.000664174	0.0602529	-0.431233
SHISA5	0.42239	7.74711	3.72885	0.000671641	0.0606359	-0.425034
ZNF649	-0.447611	1.3363	-3.72104	0.000686702	0.0611146	-0.428471
NSUN6	-0.431855	2.06995	-3.71975	0.000689233	0.0611146	-0.411973
CFL2	-0.422975	1.07254	-3.71602	0.000696553	0.0611146	-0.45713
KMO	-0.603764	1.90245	-3.71568	0.000697241	0.0611146	-0.423568
FUBP3	-0.375459	4.01733	-3.7156	0.000697391	0.0611146	-0.473148
ATP2B1	-0.315946	5.74488	-3.71152	0.000705501	0.0611146	-0.499919
ZNF551	-0.410804	2.11393	-3.71012	0.000708316	0.0611146	-0.435815
ABCB4	-0.836842	0.215806	-3.70674	0.000715128	0.0611146	-0.592409
AGPAT1	0.336462	5.23984	3.70592	0.000716808	0.0611146	-0.518319
NAPEPLD	-0.345534	2.52023	-3.70373	0.000721272	0.0611146	-0.456481
ANGEL2	-0.367517	3.7184	-3.70109	0.00072668	0.0611146	-0.501215
UST	-0.453006	1.12518	-3.69976	0.000729427	0.0611146	-0.492312
ECHDC3	0.882825	1.46983	3.69821	0.000732631	0.0611146	-0.474087
POGLUT3	-0.448238	2.02114	-3.6946	0.000740166	0.0611146	-0.474263
B3GLCT	-0.494073	1.13253	-3.69307	0.000743384	0.0611146	-0.507603
ZSCAN12	-0.535193	1.21206	-3.69244	0.000744714	0.0611146	-0.504945
PIBF1	-0.454922	1.9558	-3.69234	0.000744909	0.0611146	-0.480143
PMEPA1	-0.677267	1.33091	-3.69144	0.000746817	0.0611146	-0.501334
SS18	-0.309681	4.18187	-3.68972	0.000750462	0.0611146	-0.545012
PMS1	-0.447377	2.22166	-3.68902	0.00075195	0.0611146	-0.48861
AC011912.1	0.566954	-0.83565	3.68382	0.000763102	0.0611146	-0.852008
LRCH4	0.290791	7.14227	3.67927	0.000772978	0.0611146	-0.562828
KCNH8	-1.23773	-0.827427	-3.67459	0.000783286	0.0611146	-0.921808
LILRA5	0.616471	6.46638	3.67389	0.000784832	0.0611146	-0.58821
CCSER2	-0.356193	4.00141	-3.67313	0.00078652	0.0611146	-0.582308
SYPL1	-0.349772	4.3898	-3.6728	0.000787257	0.0611146	-0.593221
DHRS12	0.596441	3.9182	3.66852	0.00079683	0.0611146	-0.594862
APPL1	-0.390657	3.9427	-3.66807	0.000797853	0.0611146	-0.5932
TOP2B	-0.284033	5.9129	-3.66773	0.000798616	0.0611146	-0.611603
DNAJC21	-0.310481	3.72583	-3.6661	0.0008023	0.0611146	-0.59169
SLC33A1	-0.240752	3.51841	-3.66454	0.000805845	0.0611146	-0.588641
GTPBP1	0.295103	5.82062	3.66409	0.000806857	0.0611146	-0.622787
AK3	-0.273478	3.39906	-3.66221	0.000811158	0.0611146	-0.5899
AC093297.2	-0.518534	1.29573	-3.66137	0.000813076	0.0611146	-0.573504
GPR174	-0.468406	3.61783	-3.66064	0.000814772	0.0611146	-0.60077
USP47	-0.33434	4.49774	-3.66018	0.000815816	0.0611146	-0.628046
MSANTD4	-0.46281	2.26252	-3.65808	0.000820662	0.0611146	-0.565704
METRNL	0.308874	4.88951	3.65518	0.000827416	0.0611146	-0.64848
DKC1	-0.236612	4.34469	-3.65426	0.000829561	0.0611146	-0.640745
EXD2	-0.371664	1.73024	-3.65408	0.000829978	0.0611146	-0.576069
ZBED5	-0.400677	4.21644	-3.65162	0.000835767	0.0611146	-0.643232
SOCS1	0.513752	1.77187	3.65133	0.000836445	0.0611146	-0.581374
TEX10	-0.265448	3.12603	-3.65108	0.000837032	0.0611146	-0.607882
AC008894.2	0.398384	3.89893	3.6493	0.000841264	0.0611146	-0.643463
NPEPL1	0.286786	5.74518	3.64876	0.00084254	0.0611146	-0.663108
MIER3	-0.632285	2.16274	-3.6471	0.000846495	0.0611146	-0.59155
CTSD	0.451045	8.4677	3.64702	0.000846684	0.0611146	-0.622562
TRABD	0.258662	6.24618	3.64679	0.00084723	0.0611146	-0.661609
COL19A1	-1.05321	0.0285218	-3.64543	0.000850476	0.0611146	-0.767469
RRN3	-0.396454	3.76592	-3.64522	0.000850997	0.0611146	-0.645746
MRPL50	-0.597736	1.84147	-3.64443	0.000852885	0.0611146	-0.598515
ZW10	-0.299653	2.25068	-3.64357	0.000854967	0.0611146	-0.601854
NUP160	-0.313403	4.14833	-3.64154	0.000859863	0.0611146	-0.667889
ZNF12	-0.455787	3.48567	-3.6384	0.000867497	0.0611146	-0.6522
AL021707.6	0.545108	1.8961	3.6371	0.000870696	0.0611146	-0.615573
GTF2H3	-0.277292	2.79135	-3.63561	0.000874353	0.0611146	-0.635115
WDR35	-0.374979	1.67591	-3.63535	0.000874981	0.0611146	-0.62244
CLN3	0.240731	5.27553	3.63374	0.000878964	0.0611146	-0.704651
RBCK1	0.281921	6.45401	3.63132	0.000884979	0.0611146	-0.697966
PLPP5	-0.505001	3.30457	-3.63128	0.000885082	0.0611146	-0.663201
TSPAN14	0.213608	6.92988	3.62832	0.00089247	0.0611146	-0.697219
LARGE2	-0.724858	1.55926	-3.62791	0.000893511	0.0611146	-0.644551
ZNF549	-0.344118	2.64594	-3.62566	0.000899186	0.0611146	-0.655193
WNT16	-1.00987	-1.56821	-3.62561	0.000899311	0.0611146	-1.23859
CCDC14	-0.489951	2.93987	-3.62516	0.000900437	0.0611146	-0.665282
FCRLB	-0.663306	-0.229102	-3.62472	0.000901576	0.0611146	-0.847462
P2RX1	0.577503	5.26266	3.62383	0.00090382	0.0611146	-0.730261
RPL23AP64	-0.721454	-1.06787	-3.62343	0.000904855	0.0611146	-1.0683
DNAJC24	-0.359541	2.39458	-3.62273	0.000906619	0.0611146	-0.655895
TCF4	-0.508923	3.24321	-3.62182	0.000908945	0.0611146	-0.685012
RBM27	-0.384492	3.89705	-3.62175	0.000909131	0.0611146	-0.710205
VEZT	-0.418638	2.85268	-3.61494	0.000926711	0.0612524	-0.688246
FCRL3	-0.685107	4.24987	-3.61418	0.000928695	0.0612524	-0.737584
KIF20B	-0.590798	1.77749	-3.61407	0.000928983	0.0612524	-0.672841
EPHA4	-0.486676	1.92046	-3.61316	0.000931345	0.0612524	-0.674021
HIP1R	-0.390549	4.4214	-3.61264	0.000932707	0.0612524	-0.748224
DENND4A	-0.365059	4.39565	-3.61245	0.000933217	0.0612524	-0.748318
BAG5	-0.239517	4.25796	-3.6121	0.000934125	0.0612524	-0.74676
ARL13B	-0.586209	0.867628	-3.61005	0.000939516	0.0612768	-0.723479
UBALD2	0.401031	7.07924	3.60659	0.000948714	0.0612768	-0.749859
CACNA1E	0.730747	2.03731	3.60645	0.000949084	0.0612768	-0.691344
AC000093.1	0.865546	4.60719	3.60596	0.000950382	0.0612768	-0.771469
E2F5	-0.419137	2.10678	-3.60577	0.000950892	0.0612768	-0.692962
TRIM4	-0.305368	4.25072	-3.60059	0.000964809	0.06196	-0.775476
SMC5	-0.406501	3.7288	-3.59844	0.000970654	0.0621219	-0.763376
ZFP30	-0.429389	1.60674	-3.59666	0.000975528	0.0622207	-0.716912
SLC7A1	-0.38746	2.79623	-3.59373	0.000983566	0.0623433	-0.73954
GPR183	-0.486608	4.20717	-3.59353	0.000984122	0.0623433	-0.791014
CEP290	-0.565968	1.86931	-3.58822	0.000998885	0.0629979	-0.73472
MTREX	-0.291086	4.39507	-3.58677	0.00100296	0.0629979	-0.814449
SMARCAD1	-0.519692	2.90085	-3.58518	0.00100744	0.0629979	-0.763707
IGHM	-0.756275	7.6579	-3.585	0.00100794	0.0629979	-0.79378
CCND3	0.385637	7.39391	3.5832	0.00101304	0.0630482	-0.803336
L3MBTL3	-0.354491	3.34836	-3.58189	0.00101677	0.0630482	-0.791071
ZDHHC12	0.328421	4.08424	3.58112	0.00101896	0.0630482	-0.823334
APOL2	0.359751	6.48126	3.57955	0.00102344	0.0630482	-0.829756
PNRC2	-0.399742	5.65603	-3.5788	0.00102561	0.0630482	-0.84198
ZNF638	-0.287687	5.22908	-3.56951	0.00105265	0.0639444	-0.867799
ZNF146	-0.438227	3.99932	-3.56948	0.00105272	0.0639444	-0.846286
MAP1LC3B2	0.508313	2.30126	3.56657	0.00106133	0.0639444	-0.793973
CYREN	0.363943	4.79923	3.56546	0.00106464	0.0639444	-0.877872
REC8	0.321845	3.54907	3.56509	0.00106574	0.0639444	-0.844777
U2AF1L4	0.319646	3.62421	3.56395	0.00106912	0.0639444	-0.850682
ZNF532	-0.453359	2.11864	-3.56361	0.00107014	0.0639444	-0.796108
HSPH1	-0.420019	4.22141	-3.5626	0.00107319	0.0639444	-0.870611
PDE4DIP	-0.233322	4.36844	-3.56088	0.00107835	0.0639444	-0.880191
CCDC66	-0.409711	2.63835	-3.55979	0.00108163	0.0639444	-0.818447
SEC63	-0.249266	4.60085	-3.55939	0.00108285	0.0639444	-0.88855
PDP1	-0.522308	3.4078	-3.55928	0.00108318	0.0639444	-0.848776
MIS12	-0.365356	3.1171	-3.55849	0.00108559	0.0639444	-0.840138
SEMA4A	0.423054	6.43421	3.55766	0.0010881	0.0639444	-0.88626
FGD3	0.357087	8.37368	3.55644	0.00109181	0.0639618	-0.852746
SPIB	-0.698443	3.82119	-3.55442	0.001098	0.0641232	-0.875878
SP4	-0.497975	3.01558	-3.55145	0.00110716	0.0644567	-0.852497
SMIM3	0.461064	3.14731	3.54977	0.00111236	0.0645586	-0.8666
NUP107	-0.267126	3.49404	-3.54655	0.00112241	0.0647764	-0.886521
LANCL1	-0.39966	3.44855	-3.54585	0.00112458	0.0647764	-0.88523
AL451062.1	0.764005	-1.28093	3.54267	0.00113463	0.0647764	-1.25611
DHX36	-0.29307	4.30996	-3.54233	0.00113569	0.0647764	-0.925423
SEMA3B	0.836285	-0.430769	3.54108	0.00113968	0.0647764	-1.04658
N6AMT1	-0.396672	1.52636	-3.54083	0.00114046	0.0647764	-0.851742
VPREB3	-0.948417	1.42063	-3.53945	0.00114485	0.0647764	-0.860139
AP002026.1	-0.69271	-1.12445	-3.53693	0.00115294	0.0647764	-1.24759
RNF6	-0.357604	3.95019	-3.53647	0.00115443	0.0647764	-0.928826
GEN1	-0.33884	2.17009	-3.53638	0.00115471	0.0647764	-0.863555
F13A1	0.634544	6.27409	3.5361	0.0011556	0.0647764	-0.943633
UBE2L6	0.469132	6.31015	3.53516	0.00115865	0.0647764	-0.945524
DPY19L1	-0.438885	2.38487	-3.53438	0.00116118	0.0647764	-0.873217
C1QC	1.14762	-1.19084	3.5302	0.00117478	0.0652804	-1.25559
MTSS1	-0.497751	4.51529	-3.52623	0.00118783	0.0652804	-0.969437
STAP1	-0.815364	1.42111	-3.52589	0.00118898	0.0652804	-0.891208
MEX3C	-0.502923	3.87114	-3.52289	0.00119894	0.0652804	-0.958987
ITPR1	-0.410199	4.0654	-3.52272	0.00119952	0.0652804	-0.966996
DRAP1	0.304545	5.2312	3.52204	0.00120181	0.0652804	-0.990248
MICAL3	-0.483563	3.0105	-3.52107	0.00120505	0.0652804	-0.928393
AC025279.1	-0.595184	2.3278	-3.5188	0.0012127	0.0652804	-0.909269
AGTRAP	0.367863	6.32386	3.51836	0.00121418	0.0652804	-0.987878
NAA60	0.21805	5.25243	3.51711	0.00121839	0.0652804	-1.00261
CCAR1	-0.258333	4.77954	-3.5163	0.00122115	0.0652804	-1.00052
ARMCX5-GPRASP2	-0.526286	-0.434613	-3.5149	0.00122593	0.0652804	-1.11779
ZNF302	-0.42915	3.50838	-3.51474	0.00122647	0.0652804	-0.965975
RIN3	0.318405	7.25301	3.51335	0.00123121	0.0652804	-0.982567
GNPDA2	-0.482096	1.92987	-3.51303	0.00123232	0.0652804	-0.916454
DENR	-0.306144	4.18042	-3.51254	0.00123398	0.0652804	-0.997112
THOC1	-0.317938	3.19678	-3.51155	0.00123738	0.0652804	-0.961171
ASPRV1	0.609127	3.39788	3.5109	0.00123963	0.0652804	-0.974967
MOB3B	-0.38803	1.28296	-3.51084	0.00123983	0.0652804	-0.928555
BDP1	-0.51711	3.4363	-3.51009	0.00124245	0.0652804	-0.973427
ZNF787	0.338676	4.81113	3.50942	0.00124475	0.0652804	-1.02039
DIPK1A	-0.499389	2.02393	-3.50712	0.00125273	0.0652804	-0.93173
NUDCD1	-0.764048	0.890258	-3.50616	0.0012561	0.0652804	-0.96229
TMEM14A	-0.591758	0.358452	-3.50601	0.0012566	0.0652804	-1.00975
KBTBD8	-0.787642	1.4239	-3.50574	0.00125754	0.0652804	-0.938372
RAB1B	0.344105	7.24516	3.50312	0.00126675	0.0654611	-1.00845
LY6G6F	0.973777	0.860512	3.50265	0.00126839	0.0654611	-0.964414
FAM30A	-0.78767	3.02696	-3.50176	0.00127153	0.0654611	-0.974025
CCNC	-0.384993	3.09005	-3.49989	0.00127816	0.0655318	-0.984862
ZNF467	0.497193	6.28324	3.49895	0.00128151	0.0655318	-1.03757
UFM1	-0.464534	4.02972	-3.49841	0.00128343	0.0655318	-1.02652
ZNF507	-0.498968	2.73439	-3.49633	0.00129086	0.0657317	-0.97788
TMEM8A	0.319494	6.41328	3.49382	0.00129988	0.065842	-1.04824
FEM1B	-0.367803	4.0634	-3.49377	0.00130007	0.065842	-1.04022
PDCL	-0.249114	2.93244	-3.49128	0.0013091	0.06612	-1.00034
MTERF1	-0.364655	1.8374	-3.49012	0.00131333	0.0661548	-0.970928
LGALSL	0.66101	2.99001	3.48744	0.00132313	0.0664696	-1.01507
CAMKK1	0.487527	4.18415	3.48621	0.00132766	0.0665182	-1.0668
ZNF404	-0.713974	-0.552468	-3.48419	0.0013351	0.0665225	-1.20881
MLKL	0.338147	5.66955	3.48314	0.00133898	0.0665225	-1.08621
GNB5	-0.233403	3.64287	-3.48295	0.00133972	0.0665225	-1.05267
CMTM5	1.05207	1.89329	3.48234	0.00134198	0.0665225	-0.99067
EIF4A2	-0.380259	6.65519	-3.47824	0.00135733	0.0669991	-1.08261
AK6	-0.567913	0.181313	-3.47613	0.00136528	0.0669991	-1.09584
ARHGAP5	-0.528489	2.74321	-3.47602	0.00136569	0.0669991	-1.02784
ASF1A	-0.439734	3.10928	-3.47579	0.00136655	0.0669991	-1.04497
ZNF75D	-0.373437	3.05256	-3.47501	0.00136952	0.0669991	-1.04496
PDE1B	0.360262	2.68652	3.47272	0.00137822	0.0670788	-1.03783
IFT57	-0.551045	1.6687	-3.47194	0.00138123	0.0670788	-1.01392
COPS8	-0.346993	2.72454	-3.47176	0.00138192	0.0670788	-1.039
TMEM209	-0.396289	2.50147	-3.47015	0.0013881	0.0672044	-1.03396
SPOCD1	1.02641	1.1304	3.46894	0.00139274	0.0672045	-1.02932
DDX50	-0.358488	3.48604	-3.46802	0.00139629	0.0672045	-1.08207
SERTAD2	-0.291838	4.47081	-3.46651	0.00140215	0.0672045	-1.12078
PSD4	0.286197	7.77181	3.46553	0.00140596	0.0672045	-1.09174
RABL3	-0.350802	2.85494	-3.4655	0.00140609	0.0672045	-1.05973
LPAR2	0.473111	6.33286	3.46422	0.00141106	0.0672704	-1.12414
STX2	-0.481806	2.91703	-3.46153	0.00142161	0.0674293	-1.07151
PTPN11	-0.326804	4.49006	-3.46043	0.00142593	0.0674293	-1.13613
NLGN3	0.35328	2.18341	3.45978	0.00142851	0.0674293	-1.05125
ZBTB38	-0.512207	3.88103	-3.4597	0.00142883	0.0674293	-1.11787
INAFM1	0.413928	2.43209	3.45794	0.0014358	0.0675873	-1.06396
C14orf93	0.246653	3.07708	3.45235	0.00145815	0.068467	-1.10538
FP565260.6	-0.35707	4.00088	-3.44907	0.00147145	0.0687098	-1.15023
CCDC77	-0.287482	2.05221	-3.449	0.00147173	0.0687098	-1.07268
BACH2	-0.535861	3.85118	-3.44709	0.00147953	0.0687098	-1.14782
EDEM2	0.217892	4.88918	3.44666	0.00148128	0.0687098	-1.17922
TTC27	-0.371466	2.21025	-3.44611	0.00148351	0.0687098	-1.08326
C3orf86	0.655194	3.22183	3.44492	0.00148839	0.0687098	-1.13119
STARD3	0.192363	5.70154	3.44453	0.00149003	0.0687098	-1.18297
TSC22D4	0.322322	7.26148	3.44358	0.00149393	0.0687098	-1.15712
GTF2IP12	0.397781	4.51437	3.44171	0.00150166	0.0687098	-1.18664
KIF3C	0.422031	2.96815	3.44142	0.00150287	0.0687098	-1.12763
REV1	-0.299239	3.56752	-3.4399	0.00150917	0.0687098	-1.15605
AL136368.1	0.498014	-0.363595	3.43901	0.00151291	0.0687098	-1.24644
PRPF4B	-0.351375	5.28282	-3.43865	0.00151441	0.0687098	-1.19865
PNOC	-0.662612	1.06906	-3.43823	0.00151614	0.0687098	-1.10655
AC091045.1	-1.5851	-1.89793	-3.43768	0.00151847	0.0687098	-1.68019
ANKRD26	-0.452945	1.72899	-3.43626	0.00152441	0.0688119	-1.0984
ZNF461	-0.366738	1.29252	-3.43501	0.00152968	0.0688834	-1.10507
KTN1	-0.455644	4.91221	-3.433	0.00153817	0.0690366	-1.21058
AC073548.1	0.402291	2.15024	3.43132	0.00154534	0.0690366	-1.119
OSCAR	0.393209	5.60423	3.43072	0.0015479	0.0690366	-1.2187
BLOC1S5	-0.330084	2.59513	-3.43004	0.00155079	0.0690366	-1.13573
OXCT1	-0.427656	3.01545	-3.42975	0.00155203	0.0690366	-1.1544
SLC6A4	0.631158	-0.488727	3.429	0.00155525	0.0690366	-1.28946
RNF152	0.752784	-1.00339	3.42718	0.00156309	0.0691172	-1.40371
JMY	-0.434161	2.74457	-3.42632	0.00156681	0.0691172	-1.15052
AC100861.1	-0.446968	1.28454	-3.426	0.00156816	0.0691172	-1.12636
DDX21	-0.331941	5.22017	-3.42341	0.0015794	0.0693018	-1.23693
ENPP4	-0.787448	2.19973	-3.42293	0.0015815	0.0693018	-1.13657
AASDHPPT	-0.334935	3.50062	-3.42153	0.00158758	0.0693018	-1.19827
NAE1	-0.300553	2.7752	-3.42067	0.00159139	0.0693018	-1.16665
ZNF180	-0.44811	2.05414	-3.41941	0.00159689	0.0693018	-1.14292
ZWILCH	-0.478284	1.09744	-3.41887	0.0015993	0.0693018	-1.14867
LEO1	-0.226369	3.15342	-3.41838	0.00160145	0.0693018	-1.19058
PIGF	-0.385516	2.23631	-3.41779	0.00160407	0.0693018	-1.15208
RBM26	-0.313441	5.0048	-3.41562	0.00161364	0.0693018	-1.25573
AC083862.3	0.5905	0.791067	3.41499	0.00161647	0.0693018	-1.16786
TGFB1I1	0.60398	0.371843	3.41497	0.00161653	0.0693018	-1.19887
IRF4	-0.573807	3.33864	-3.41479	0.00161733	0.0693018	-1.20521
SLC26A8	0.634226	2.8487	3.41192	0.00163015	0.0693018	-1.19446
ZNF408	0.212404	3.07281	3.41131	0.0016329	0.0693018	-1.20624
MRPL39	-0.498713	0.902709	-3.41073	0.00163553	0.0693018	-1.17569
MIOS	-0.31719	2.96293	-3.40928	0.00164206	0.0693018	-1.20303
IGHD	-0.820345	4.73078	-3.40915	0.00164264	0.0693018	-1.26461
AC099489.3	0.688813	-0.815207	3.40853	0.00164546	0.0693018	-1.39704
MMP17	-0.501174	2.39793	-3.40759	0.00164971	0.0693018	-1.18152
KHDC4	-0.220102	4.71183	-3.40727	0.00165116	0.0693018	-1.27402
SH3BP5L	0.350439	6.10129	3.40604	0.00165678	0.0693018	-1.27384
AC092368.3	0.531809	2.45833	3.40588	0.00165751	0.0693018	-1.19157
FBXL17	-0.374845	3.0291	-3.40585	0.00165764	0.0693018	-1.2142
VAV2	-0.46936	3.38898	-3.40438	0.00166435	0.0694271	-1.23429
CEP128	-0.513322	0.955921	-3.40322	0.00166968	0.0694943	-1.19024
SLC25A32	-0.704767	2.17186	-3.40071	0.00168121	0.0696764	-1.18929
SMAD3	-0.393503	4.69945	-3.40065	0.00168151	0.0696764	-1.28921
SLC30A5	-0.34101	3.85613	-3.39775	0.00169494	0.0699095	-1.27258
FAM98B	-0.344605	3.13844	-3.39687	0.00169904	0.0699095	-1.24164
AP5Z1	0.189476	5.44942	3.39672	0.00169975	0.0699095	-1.30473
LNPK	-0.216437	3.20591	-3.39584	0.00170388	0.0699095	-1.24861
IL7	-1.12968	-1.61967	-3.39526	0.00170656	0.0699095	-1.66686
GBA	0.294696	5.18281	3.39431	0.00171104	0.0699095	-1.31167
IER2	0.258817	7.09702	3.39346	0.00171503	0.0699095	-1.28524
FAM76B	-0.493142	3.41311	-3.39258	0.00171921	0.0699095	-1.26419
PRDM4	-0.25104	3.74506	-3.39078	0.00172771	0.0699095	-1.28603
NR1H2	0.261516	5.98595	3.39033	0.00172982	0.0699095	-1.31481
VPS50	-0.370728	2.81845	-3.38877	0.00173728	0.0699095	-1.24587
TAF9B	-0.363511	1.98275	-3.38815	0.00174024	0.0699095	-1.2161
ZBP1	0.535221	5.08184	3.38778	0.00174198	0.0699095	-1.3279
TMEM50B	-0.32577	4.26458	-3.38777	0.00174204	0.0699095	-1.31183
FADS3	-0.545932	2.55427	-3.38724	0.00174456	0.0699095	-1.23669
NFE2	0.409141	7.56266	3.38674	0.00174699	0.0699095	-1.29156
PTER	-0.419657	2.26465	-3.38544	0.00175321	0.0700085	-1.23041
C11orf68	0.261621	4.75924	3.38215	0.00176912	0.0704932	-1.33926
MAP9	-0.478376	0.989902	-3.37992	0.00177993	0.0707689	-1.24144
FAM114A2	-0.255964	2.88269	-3.37872	0.0017858	0.0707689	-1.27422
CHML	-0.63176	1.63971	-3.3784	0.0017874	0.0707689	-1.23396
PLIN5	0.47467	4.15895	3.37681	0.00179522	0.070863	-1.3394
TTF2	-0.302484	2.60269	-3.37589	0.00179973	0.070863	-1.26749
COL4A3	-1.06854	-0.363179	-3.37422	0.00180797	0.070863	-1.40775
OTUD3	-0.343248	2.84116	-3.37411	0.00180854	0.070863	-1.2827
PANK3	-0.458691	3.91432	-3.37369	0.00181061	0.070863	-1.33339
CALD1	0.470702	4.19086	3.3733	0.00181253	0.070863	-1.34908
NDUFAF6	-0.341732	1.25905	-3.37071	0.00182546	0.0712197	-1.25416
ZCCHC3	-0.193983	4.23567	-3.36791	0.0018395	0.071534	-1.36124
ZNF582	-0.84991	-0.204176	-3.36758	0.00184117	0.071534	-1.39007
FOLR3	1.2355	3.62451	3.36669	0.00184568	0.0715603	-1.34147
LRPPRC	-0.358895	4.69741	-3.36381	0.00186028	0.0716567	-1.381
NUP155	-0.254659	3.20216	-3.3621	0.00186898	0.0716567	-1.33067
CD1C	-0.531478	2.37181	-3.36176	0.00187075	0.0716567	-1.29045
NDC1	-0.407444	2.23459	-3.36099	0.00187469	0.0716567	-1.28775
MYL9	1.38487	3.76928	3.36082	0.00187554	0.0716567	-1.36108
PRRC1	-0.37312	3.56429	-3.36066	0.00187636	0.0716567	-1.35094
ADRA2A	1.37643	-1.72326	3.36052	0.00187709	0.0716567	-1.7198
PARP15	-0.469577	5.08904	-3.35952	0.00188222	0.0716567	-1.39497
SAAL1	-0.35638	1.41532	-3.35943	0.00188268	0.0716567	-1.27826
MPP6	-0.358803	1.44466	-3.35806	0.00188977	0.0717805	-1.28131
MYOM3	0.795064	0.4147	3.35707	0.0018949	0.0718294	-1.32227
OTUD4	-0.442566	3.80579	-3.35561	0.00190247	0.0719705	-1.37352
GTF3C3	-0.404975	2.97196	-3.35435	0.00190902	0.0720723	-1.33668
GPR155	0.318235	5.16507	3.35281	0.0019171	0.0722314	-1.4149
ZDHHC23	-0.629446	1.01624	-3.35195	0.00192157	0.0722543	-1.30438
LINC00514	0.561631	0.75937	3.35112	0.00192594	0.0722731	-1.3131
LY6G5B	0.291983	3.60958	3.35003	0.0019317	0.0723179	-1.38331
SGK3	-0.21926	3.82719	-3.34943	0.00193488	0.0723179	-1.39177
GPATCH11	-0.46452	2.7066	-3.34636	0.00195116	0.0727812	-1.34261
LMBRD2	-0.554181	2.62546	-3.34549	0.0019558	0.0728088	-1.33994
RABGGTB	-0.341879	3.06367	-3.34274	0.00197054	0.0732115	-1.37023
AIMP1	-0.344108	3.6457	-3.34176	0.00197585	0.0732391	-1.40156
TMEM168	-0.342073	3.4963	-3.34115	0.00197912	0.0732391	-1.39581
C10orf105	0.423404	3.74777	3.33938	0.00198869	0.0733609	-1.41601
AGPAT5	-0.486988	2.72644	-3.33909	0.00199026	0.0733609	-1.36052
SLC26A2	-0.427717	2.40814	-3.33505	0.00201233	0.0734042	-1.35632
CISD1	-0.413664	1.04852	-3.33465	0.00201454	0.0734042	-1.34146
TDRD9	0.743787	1.61182	3.33335	0.00202172	0.0734042	-1.33967
AC096537.1	0.350889	0.881369	3.33322	0.00202243	0.0734042	-1.34819
AF131215.5	-0.508584	0.996395	-3.33317	0.00202269	0.0734042	-1.34718
FLJ45513	0.49793	0.430021	3.33026	0.00203882	0.0734042	-1.37972
AL353743.1	-0.506945	0.133295	-3.32959	0.00204251	0.0734042	-1.41701
AC005332.2	-0.812504	0.208376	-3.32909	0.00204528	0.0734042	-1.41542
IQCB1	-0.469094	3.09504	-3.32894	0.00204614	0.0734042	-1.40398
REST	-0.304706	4.24142	-3.32867	0.00204766	0.0734042	-1.45741
AKAP11	-0.537461	3.95862	-3.3284	0.00204918	0.0734042	-1.44569
IL23A	-0.547381	0.537908	-3.32648	0.00205989	0.0734042	-1.38675
RFX7	-0.488485	3.13357	-3.32511	0.0020676	0.0734042	-1.41508
NIPAL2	-0.494654	2.66407	-3.32362	0.002076	0.0734042	-1.39504
ALDH3B1	0.323884	5.32364	3.32362	0.00207603	0.0734042	-1.48691
TMEM263	-0.517556	2.85939	-3.32346	0.00207695	0.0734042	-1.40459
ZNF525	-0.423342	2.0594	-3.32337	0.00207746	0.0734042	-1.37133
SMC3	-0.300645	4.58083	-3.323	0.0020795	0.0734042	-1.48022
TRIM56	0.210381	7.49183	3.3226	0.00208181	0.0734042	-1.45088
USP24	-0.327064	5.17712	-3.32224	0.00208381	0.0734042	-1.48836
BTLA	-0.718503	2.23793	-3.32195	0.00208551	0.0734042	-1.37878
MTM1	-0.310465	3.49138	-3.32106	0.00209053	0.0734042	-1.4448
ZNF341	0.288372	2.96852	3.32103	0.00209069	0.0734042	-1.42124
TCEA1	-0.37608	5.09224	-3.32102	0.00209078	0.0734042	-1.49083
LAMA5	-0.7768	1.12362	-3.32063	0.00209302	0.0734042	-1.37268
GALNT11	-0.281555	3.33358	-3.32026	0.00209513	0.0734042	-1.43918
MAP3K7	-0.285376	4.40375	-3.31982	0.00209761	0.0734042	-1.48408
DNAJC19	-0.42362	1.82741	-3.31916	0.00210142	0.0734042	-1.37509
C19orf38	0.401915	5.63369	3.31766	0.00211	0.0735351	-1.49949
PHLPP2	-0.338462	2.08062	-3.31674	0.00211525	0.0735351	-1.38811
RALY	0.262615	6.66976	3.31619	0.00211843	0.0735351	-1.48518
ZNF616	-0.296361	1.71014	-3.31576	0.0021209	0.0735351	-1.38117
CAND1	-0.280866	4.81549	-3.31227	0.00214115	0.0740511	-1.5106
ZNF260	-0.425305	1.93482	-3.31183	0.00214371	0.0740511	-1.39491
LGALSL-DT	0.669308	1.01161	3.31021	0.00215319	0.0742413	-1.39577
AASDH	-0.357428	2.17791	-3.30822	0.00216487	0.0745066	-1.41153
BEX3	0.569599	2.66347	3.30672	0.00217374	0.0745401	-1.44024
CYBC1	0.285925	7.80884	3.3067	0.00217382	0.0745401	-1.48235
KIAA1143	-0.248678	4.32513	-3.30562	0.0021802	0.0745652	-1.51714
SYNPO	-0.744199	1.15681	-3.30523	0.00218253	0.0745652	-1.40655
ZBTB1	-0.508661	4.25564	-3.30275	0.00219727	0.0747587	-1.51953
EFNA4	0.306509	1.79872	3.30212	0.00220107	0.0747587	-1.41577
SNHG7	-0.383378	3.35153	-3.30145	0.00220508	0.0747587	-1.48503
HIBCH	-0.272759	2.13482	-3.3013	0.002206	0.0747587	-1.42655
ATG9A	0.280645	5.19393	3.30093	0.0022082	0.0747587	-1.54301
PSME1	0.29909	7.49015	3.2989	0.0022204	0.0750358	-1.50875
POLR2B	-0.255631	5.73959	-3.29614	0.00223711	0.0753358	-1.55016
G2E3	-0.377176	2.7836	-3.29518	0.00224292	0.0753358	-1.46996
ARMC1	-0.418614	2.90307	-3.29431	0.00224825	0.0753358	-1.47801
CD40	-0.488277	2.73417	-3.29411	0.00224947	0.0753358	-1.46882
ZNF830	-0.223664	3.48586	-3.29325	0.00225473	0.0753358	-1.51319
AL136295.5	0.453171	3.34348	3.29266	0.00225832	0.0753358	-1.51041
MGAT1	0.229478	7.54659	3.2924	0.0022599	0.0753358	-1.52329
MEAF6	-0.193345	4.39687	-3.29214	0.00226152	0.0753358	-1.55261
AC132872.1	0.36521	2.10739	3.29002	0.00227458	0.0754814	-1.4541
SMARCA5	-0.346317	5.35522	-3.28993	0.0022751	0.0754814	-1.56771
EBAG9	-0.307003	2.34291	-3.28906	0.0022805	0.0754814	-1.46381
FXR1	-0.266906	4.67554	-3.28823	0.00228565	0.0754814	-1.56773
AL022098.1	0.471486	2.4144	3.28784	0.00228804	0.0754814	-1.47278
ATAD1	-0.445493	3.21681	-3.28665	0.00229546	0.0754814	-1.51288
ZNF17	-0.340085	1.27941	-3.28571	0.00230132	0.0754814	-1.44811
MEF2C	-0.39137	4.46966	-3.28554	0.00230237	0.0754814	-1.56897
DDX20	-0.228087	3.20127	-3.28499	0.00230579	0.0754814	-1.51815
RAD17	-0.315402	2.98829	-3.28491	0.00230629	0.0754814	-1.50628
WDR75	-0.412142	3.16704	-3.28376	0.00231353	0.0755859	-1.51784
SNX22	-0.4999	3.41268	-3.28309	0.0023177	0.0755902	-1.53161
MALT1	-0.328033	4.73611	-3.28129	0.00232906	0.0758283	-1.58527
HIST2H2BE	0.53258	4.38785	3.27791	0.00235045	0.0763915	-1.58966
IFNLR1	-0.570939	1.42519	-3.27634	0.00236051	0.0764622	-1.46915
CTRC	0.695002	-0.41621	3.27539	0.00236657	0.0764622	-1.59002
OPN3	-0.344411	2.7397	-3.27446	0.00237251	0.0764622	-1.51753
ZBTB11	-0.44165	4.20579	-3.27353	0.00237851	0.0764622	-1.59011
ALKBH4	0.257782	3.05036	3.27177	0.0023899	0.0764622	-1.54456
ZNF680	-0.626712	0.397585	-3.27136	0.00239254	0.0764622	-1.51722
OTUD6B	-0.606046	1.38076	-3.26958	0.00240408	0.0764622	-1.48452
TBC1D9	-0.584848	3.97441	-3.2695	0.00240459	0.0764622	-1.58989
C2CD5	-0.363174	4.18917	-3.26919	0.00240663	0.0764622	-1.60098
AC099792.1	0.696261	-1.39109	3.26919	0.00240663	0.0764622	-1.79339
FUT8	-0.367452	2.49322	-3.26859	0.00241056	0.0764622	-1.51881
PEG10	-1.30981	-1.34621	-3.26847	0.00241129	0.0764622	-1.82958
PTPDC1	-0.53006	0.305167	-3.26785	0.00241533	0.0764622	-1.53107
FOXO1	-0.328173	4.48033	-3.26777	0.00241591	0.0764622	-1.61328
SLC5A9	0.636057	0.167626	3.26757	0.00241719	0.0764622	-1.53639
NLRP9P1	0.766731	-0.399899	3.26743	0.00241809	0.0764622	-1.60371
MIGA1	-0.288801	2.61927	-3.2661	0.0024268	0.0765528	-1.53177
IRF9	0.324763	6.73907	3.26424	0.00243904	0.0765528	-1.61067
KIFAP3	-0.272859	2.7486	-3.26401	0.00244057	0.0765528	-1.54363
UNC13D	0.284372	7.53897	3.26332	0.00244517	0.0765528	-1.59411
CCDC69	0.2106	6.86699	3.26297	0.00244745	0.0765528	-1.61088
CMTM7	0.226791	4.70635	3.26266	0.00244951	0.0765528	-1.63315
ZFR	-0.32577	4.99901	-3.26264	0.00244962	0.0765528	-1.6339
BCKDK	0.334279	4.80643	3.26062	0.00246303	0.0766858	-1.6397
PPP4R3B	-0.309929	5.57397	-3.26018	0.00246596	0.0766858	-1.63962
SUPT16H	-0.20204	5.48675	-3.2594	0.00247116	0.0766858	-1.64256
SLC4A7	-0.605906	3.22047	-3.25877	0.00247538	0.0766858	-1.57866
HIST1H4I	0.553598	1.95191	3.25836	0.00247814	0.0766858	-1.52276
FANCF	-0.325486	2.9023	-3.25729	0.00248534	0.0766858	-1.56764
RPH3AL	0.47454	0.899351	3.25614	0.00249304	0.0766858	-1.51982
TCIRG1	0.295211	8.30933	3.25594	0.00249436	0.0766858	-1.59379
AL137003.2	-0.482162	0.18757	-3.25563	0.0024965	0.0766858	-1.56707
RNGTT	-0.437892	3.23399	-3.25449	0.00250418	0.0766858	-1.5915
PLEKHA1	-0.278303	4.03752	-3.25399	0.00250755	0.0766858	-1.63336
AC020658.5	0.727409	-1.15873	3.25397	0.00250773	0.0766858	-1.76869
U2SURP	-0.359612	4.84376	-3.25364	0.00250995	0.0766858	-1.65415
NUP37	-0.329861	1.7372	-3.25315	0.00251323	0.0766858	-1.52677
CEBPG	-0.336704	3.48711	-3.25283	0.00251543	0.0766858	-1.61001
N4BP2	-0.527979	2.13617	-3.24893	0.00254207	0.0772544	-1.54807
ITPR2	-0.352294	4.05364	-3.24838	0.00254581	0.0772544	-1.64673
PPHLN1	-0.188881	4.71798	-3.24801	0.00254835	0.0772544	-1.66727
RAP2A	-0.541137	3.45225	-3.24725	0.00255363	0.0772544	-1.61975
CEP120	-0.467696	3.54636	-3.24708	0.00255475	0.0772544	-1.62568
ARHGAP12	-0.468292	2.71908	-3.24598	0.00256238	0.0773598	-1.58324
BTBD2	0.194789	5.79016	3.24427	0.00257422	0.0775919	-1.67739
RASGEF1B	-0.369604	1.68522	-3.24274	0.00258484	0.0775946	-1.54943
CTDSP1	0.256489	7.3023	3.24238	0.00258736	0.0775946	-1.65051
PLEKHM2	0.212014	5.75941	3.24067	0.00259934	0.0775946	-1.68658
ZNF816	-0.472205	1.60036	-3.24064	0.00259957	0.0775946	-1.55242
ZNF770	-0.526337	3.62754	-3.24049	0.00260063	0.0775946	-1.645
AL513327.1	0.566511	3.31683	3.23922	0.00260951	0.0775946	-1.63827
KCNQ5	-0.598687	-0.23079	-3.2391	0.00261038	0.0775946	-1.6514
AL023875.1	0.272392	4.04014	3.23895	0.0026114	0.0775946	-1.67307
PIK3C2B	-0.397295	3.37054	-3.2383	0.00261597	0.0775946	-1.63848
RIMKLB	-0.462405	1.8018	-3.23829	0.00261605	0.0775946	-1.56211
MAP3K11	0.279168	7.13344	3.23774	0.00261998	0.0775946	-1.66581
SET	-0.195251	6.75338	-3.23672	0.00262716	0.0776049	-1.67714
ZNF256	-0.427487	0.753861	-3.23651	0.00262863	0.0776049	-1.57023
UFL1	-0.522577	3.43059	-3.23495	0.00263972	0.0778094	-1.6481
ACOT8	0.241248	3.50779	3.23405	0.00264611	0.0778749	-1.66037
BUB3	-0.270714	4.99596	-3.23137	0.00266527	0.0780679	-1.7105
NR6A1	0.46679	2.67852	3.23098	0.00266808	0.0780679	-1.62165
SLA2	0.346112	4.45577	3.23074	0.00266985	0.0780679	-1.70625
AGAP9	-0.800766	1.86879	-3.22982	0.00267646	0.0780679	-1.58252
AC093227.1	-1.57366	-1.26223	-3.22927	0.00268042	0.0780679	-1.90107
AL133216.2	0.455636	4.09456	3.22898	0.00268252	0.0780679	-1.69963
AL732372.3	0.55744	6.13199	3.22873	0.00268428	0.0780679	-1.70963
BLM	-0.341186	1.81464	-3.22848	0.00268609	0.0780679	-1.58557
ZNF253	-0.397328	1.5354	-3.22752	0.00269306	0.078149	-1.58154
ING3	-0.239095	3.18488	-3.22635	0.00270159	0.078275	-1.6582
LIMD1	-0.23649	4.34025	-3.22546	0.00270801	0.0783387	-1.71321
ZSCAN29	-0.327264	3.5562	-3.22489	0.00271218	0.0783387	-1.68117
ZNF184	-0.486668	1.62148	-3.22244	0.00273014	0.0787359	-1.59428
NBPF20	-0.532909	1.98115	-3.21985	0.0027492	0.0789902	-1.6101
LTB4R	0.343358	5.96923	3.21927	0.00275351	0.0789902	-1.73557
AC006064.6	-1.34406	1.9793	-3.21879	0.00275709	0.0789902	-1.60729
AC098934.2	0.829286	-1.43548	3.21871	0.00275765	0.0789902	-1.89488
MATR3	-0.400171	6.14608	-3.21771	0.00276505	0.0789902	-1.73529
TULP4	-0.318695	2.64422	-3.21739	0.00276747	0.0789902	-1.64845
HPCAL1	0.26764	5.84163	3.21629	0.00277565	0.0789902	-1.74474
BCLAF1	-0.301059	6.08566	-3.21619	0.0027764	0.0789902	-1.74026
COL4A4	-0.790281	0.0204657	-3.21611	0.002777	0.0789902	-1.67083
BTG3	-0.445779	0.325328	-3.21469	0.00278764	0.079058	-1.64159
CD200	-0.894447	0.555851	-3.21351	0.00279644	0.079058	-1.63376
RABEP1	-0.361752	4.59854	-3.21307	0.00279974	0.079058	-1.74867
SETBP1	-0.441913	1.58343	-3.21257	0.0028035	0.079058	-1.61631
SACS	-0.637538	2.09598	-3.21254	0.00280375	0.079058	-1.63054
KPNA3	-0.301071	3.86658	-3.21233	0.00280537	0.079058	-1.7266
C1QTNF12	0.71244	-1.51242	3.21141	0.00281225	0.079058	-1.92574
DNAJC27	-0.396579	1.3762	-3.2108	0.00281689	0.079058	-1.61773
GNE	-0.238973	2.97066	-3.2102	0.00282141	0.079058	-1.68453
ZBTB5	-0.357631	2.61907	-3.20988	0.00282384	0.079058	-1.6642
GOLT1B	-0.448012	2.98521	-3.20961	0.00282592	0.079058	-1.68459
TWSG1	-0.486295	1.58063	-3.20878	0.0028322	0.0791154	-1.62469
CSE1L	-0.263598	4.06317	-3.20772	0.00284029	0.0791353	-1.74639
SAMD14	1.3971	0.38519	3.20739	0.00284283	0.0791353	-1.65063
TCF12	-0.403192	3.69564	-3.20702	0.00284562	0.0791353	-1.73023
ATP2C1	-0.250892	4.22208	-3.20464	0.00286384	0.0794819	-1.7597
GFM2	-0.317885	2.69035	-3.20357	0.00287207	0.0794819	-1.68343
HGS	0.199908	5.81183	3.2027	0.00287881	0.0794819	-1.77804
SIPA1L3	-0.363679	3.88667	-3.20214	0.00288311	0.0794819	-1.75159
MAPK3	0.433615	5.95931	3.20213	0.00288326	0.0794819	-1.77724
NEK3	-0.339805	1.42923	-3.20208	0.0028836	0.0794819	-1.63799
MAGEF1	-0.406217	1.94203	-3.20018	0.00289838	0.0797716	-1.6545
HNRNPDL	-0.265425	6.5525	-3.19782	0.00291676	0.0800611	-1.7756
RAB11FIP2	-0.531295	2.76976	-3.19773	0.00291747	0.0800611	-1.69949
AGAP2	0.25399	5.74953	3.19683	0.00292449	0.0800724	-1.79313
ARL8A	0.253333	5.30116	3.19658	0.00292645	0.0800724	-1.79743
GLO1	-0.316236	3.60295	-3.19451	0.00294273	0.0802901	-1.75663
FGFR4	0.592511	-1.41921	3.19434	0.00294408	0.0802901	-1.9352
USP1	-0.418122	4.18315	-3.19371	0.00294907	0.0802901	-1.78304
TRAM1	-0.355347	5.92289	-3.19331	0.00295221	0.0802901	-1.798
C16orf87	-0.33443	1.50344	-3.19285	0.00295589	0.0802901	-1.65993
CHST7	0.386688	3.33452	3.19228	0.00296038	0.0802956	-1.75155
ANKRD13C	-0.421664	2.73976	-3.19052	0.00297438	0.0804662	-1.71622
ZNF639	-0.27162	2.80966	-3.19008	0.00297789	0.0804662	-1.72257
NIPA1	-0.319732	2.57398	-3.18958	0.00298184	0.0804662	-1.7099
ACP7	0.462078	0.860612	3.18887	0.00298755	0.0804662	-1.66951
GLRX2	-0.27184	2.79261	-3.18879	0.0029882	0.0804662	-1.72454
FAM169A	-0.750402	0.491325	-3.18735	0.00299975	0.0806351	-1.69244
MAP3K4	-0.275668	3.92003	-3.18693	0.00300311	0.0806351	-1.79045
DNAJB12	0.223272	5.30448	3.18482	0.00302016	0.0808589	-1.82581
ZNF615	-0.284982	1.96923	-3.18413	0.00302567	0.0808589	-1.69337
WDR3	-0.240218	3.31057	-3.18288	0.00303583	0.0808589	-1.76918
ADAM23	-0.861097	0.243108	-3.18243	0.00303953	0.0808589	-1.71964
AGPS	-0.346501	3.79669	-3.18165	0.00304585	0.0808589	-1.79659
ZNF248	-0.420231	1.79325	-3.18138	0.00304809	0.0808589	-1.69279
GORAB	-0.511109	1.31225	-3.18119	0.00304961	0.0808589	-1.68383
OGFR	0.248602	6.93226	3.18091	0.0030519	0.0808589	-1.80765
ALCAM	-0.465887	3.02437	-3.18083	0.00305251	0.0808589	-1.75534
TRPM7	-0.347652	4.26967	-3.18025	0.00305732	0.0808589	-1.81924
PAPLN	0.362236	1.26486	3.18004	0.00305904	0.0808589	-1.68662
CALM3	0.247349	7.56094	3.17638	0.00308906	0.0812527	-1.80284
KANSL2	-0.268318	3.28853	-3.17633	0.00308952	0.0812527	-1.78311
OSBPL3	-0.385286	3.36928	-3.17461	0.00310376	0.0812527	-1.79083
COPDA1	-1.00399	-1.11929	-3.17386	0.00311	0.0812527	-1.93943
SENCR	0.463688	0.8876	3.17322	0.00311525	0.0812527	-1.70337
MBNL2	-0.578187	2.8374	-3.17269	0.00311968	0.0812527	-1.76204
STRADA	0.193712	5.11858	3.17242	0.00312199	0.0812527	-1.85573
MRPL19	-0.273213	2.88762	-3.17226	0.00312329	0.0812527	-1.76913
TERF1	-0.199589	3.26077	-3.17194	0.003126	0.0812527	-1.79269
IPO11	-0.38351	1.88057	-3.17122	0.00313195	0.0812527	-1.719
STAMBPL1	-0.360949	2.1017	-3.17102	0.00313365	0.0812527	-1.72886
PPIP5K2	-0.357848	4.54334	-3.17099	0.00313393	0.0812527	-1.84907
TNFAIP8	-0.281849	5.54796	-3.16957	0.00314584	0.0812527	-1.85972
MAPK8	-0.326462	3.16248	-3.16937	0.0031475	0.0812527	-1.79173
AATK	0.512956	6.55977	3.16842	0.00315554	0.0812527	-1.8463
STXBP2	0.350003	7.60266	3.16804	0.00315869	0.0812527	-1.82165
TRMT13	-0.559337	2.38575	-3.16798	0.0031592	0.0812527	-1.74803
MT2A	0.716546	3.5325	3.16766	0.00316192	0.0812527	-1.82142
NKRF	-0.397249	2.41979	-3.16764	0.00316209	0.0812527	-1.75207
MAN1A2	-0.388523	3.87456	-3.16751	0.00316322	0.0812527	-1.83376
LRRC40	-0.524287	1.7528	-3.16716	0.00316613	0.0812527	-1.72332
AKT3	-0.326986	3.42228	-3.16675	0.00316959	0.0812527	-1.81327
NADK2	-0.298923	2.19733	-3.16575	0.0031781	0.0813593	-1.74585
RGS3	0.236175	5.31653	3.16476	0.0031865	0.0814627	-1.87415
DDHD2	-0.28528	3.75487	-3.16368	0.00319567	0.0815856	-1.83839
WDR43	-0.377889	3.31562	-3.16284	0.00320289	0.0816585	-1.81557
F2RL3	0.439648	0.697678	3.16166	0.00321297	0.0817312	-1.73299
METTL15	-0.319594	1.76479	-3.16148	0.00321449	0.0817312	-1.73766
AC092747.4	-0.36288	1.94344	-3.15847	0.00324041	0.0822783	-1.75091
NVL	-0.240301	3.04689	-3.1571	0.00325227	0.0824673	-1.81492
HAAO	0.361134	1.51737	3.1558	0.00326359	0.0826421	-1.74514
TARSL2	-0.285949	2.57065	-3.15465	0.00327357	0.0827829	-1.79177
TMEM156	-0.410955	2.25246	-3.15257	0.00329184	0.0831165	-1.77826
ATXN3	-0.215575	3.97559	-3.15084	0.00330699	0.0831165	-1.87972
SCN1B	0.563428	2.11909	3.15079	0.00330748	0.0831165	-1.77954
AF127577.3	0.624836	0.0794296	3.14895	0.00332368	0.0831165	-1.79294
GP9	0.973811	2.89838	3.14864	0.00332647	0.0831165	-1.82875
NT5DC1	-0.240329	3.32335	-3.14835	0.00332906	0.0831165	-1.85187
SYTL3	0.331623	4.81538	3.14806	0.00333164	0.0831165	-1.91242
KLRB1	-0.596121	2.78346	-3.14753	0.00333635	0.0831165	-1.81837
TDRD3	-0.238175	2.50604	-3.14722	0.0033391	0.0831165	-1.80582
SH2D1A	-0.546732	2.9706	-3.14704	0.00334065	0.0831165	-1.83096
NAB2	-0.234617	2.54073	-3.14704	0.00334069	0.0831165	-1.80797
SINHCAF	-0.412387	3.93937	-3.14696	0.00334142	0.0831165	-1.88537
NOL8	-0.318694	3.98258	-3.1466	0.00334459	0.0831165	-1.88934
ORMDL1	-0.343483	4.12157	-3.14541	0.00335521	0.0831975	-1.89744
PARP10	0.335856	6.50326	3.14524	0.00335675	0.0831975	-1.90321
SBDSP1	-0.440558	0.890822	-3.14438	0.00336439	0.0832764	-1.76776
AC012645.3	0.298575	2.4205	3.1435	0.0033723	0.0833619	-1.81216
AC118344.1	-0.761285	-1.48739	-3.14272	0.00337927	0.0833802	-2.06606
CHMP1A	0.238288	6.15287	3.14242	0.00338197	0.0833802	-1.91738
HNRNPA2B1	-0.188576	8.15672	-3.14184	0.00338728	0.0834012	-1.87018
CROT	-0.349326	2.07816	-3.13996	0.00340424	0.0837084	-1.79925
SREK1IP1	-0.291655	3.36399	-3.13918	0.00341133	0.083747	-1.87531
ALKBH8	-0.426216	1.84602	-3.1388	0.00341477	0.083747	-1.79153
UBA5	-0.342314	2.98478	-3.1383	0.00341928	0.0837478	-1.85438
MBLAC2	-0.678109	0.955914	-3.13731	0.00342827	0.0838581	-1.78277
CKS2	-0.893719	-0.944708	-3.13613	0.00343912	0.0839129	-1.97234
DCK	-0.442326	4.51992	-3.13563	0.00344368	0.0839129	-1.93246
PLEKHF2	-0.503099	4.03579	-3.13488	0.0034505	0.0839129	-1.91706
TBKBP1	0.433534	4.8197	3.13431	0.00345576	0.0839129	-1.94552
ZNF671	-0.240173	3.44331	-3.1342	0.00345677	0.0839129	-1.89228
ESF1	-0.483791	2.26258	-3.13411	0.00345763	0.0839129	-1.82126
TADA3	0.209459	5.94862	3.13326	0.00346541	0.0839129	-1.94299
CHIC1	-0.489444	1.87731	-3.13183	0.00347861	0.0839129	-1.80815
KLHL42	-0.368916	2.89961	-3.13116	0.00348483	0.0839129	-1.86563
PUS7	-0.338404	0.95726	-3.13107	0.00348568	0.0839129	-1.79549
TYMP	0.390649	8.3605	3.13064	0.0034896	0.0839129	-1.89128
CARD19	0.284852	4.85073	3.13052	0.00349072	0.0839129	-1.95474
CFD	1.01563	6.26289	3.12917	0.00350333	0.0839129	-1.94603
AC103718.1	0.607856	-1.06172	3.12884	0.00350639	0.0839129	-1.98234
CYBA	0.329355	8.65101	3.12883	0.00350642	0.0839129	-1.88843
FAM135A	-0.482806	1.29298	-3.1286	0.00350858	0.0839129	-1.8008
DYRK2	-0.44166	4.94498	-3.12859	0.00350867	0.0839129	-1.95664
KLHL24	-0.265229	4.74378	-3.12797	0.00351451	0.0839129	-1.9569
UPK3B	0.65333	0.0867529	3.12783	0.00351583	0.0839129	-1.83615
TOMM70	-0.299524	3.88106	-3.12388	0.00355289	0.0844484	-1.93897
ZNF480	-0.32129	2.27652	-3.12374	0.00355415	0.0844484	-1.84692
PRR14	0.268803	5.19082	3.12362	0.00355537	0.0844484	-1.97309
UTP18	-0.276358	3.82827	-3.12351	0.00355634	0.0844484	-1.93753
GANC	-0.242514	3.18958	-3.12061	0.00358379	0.08499	-1.90946
ICE2	-0.29726	3.67839	-3.12015	0.00358824	0.08499	-1.93787
C17orf75	-0.262809	2.28473	-3.11891	0.0036	0.0851606	-1.85882
PAIP1	-0.363093	3.06338	-3.1183	0.00360591	0.0851924	-1.90577
CEP95	-0.31415	3.45997	-3.11676	0.00362061	0.0853653	-1.93376
SLC38A1	-0.441873	6.08676	-3.11658	0.00362236	0.0853653	-1.9792
INPP5F	-0.277935	2.37956	-3.11555	0.0036323	0.0854124	-1.87158
DNAJB9	-0.3523	2.82779	-3.11522	0.00363546	0.0854124	-1.8985
SCN3A	-0.929169	0.21237	-3.1146	0.00364145	0.0854124	-1.8643
NOC3L	-0.562671	1.96076	-3.11424	0.00364489	0.0854124	-1.85113
ARID3B	0.236007	5.01974	3.11371	0.00365002	0.0854124	-1.99618
KRIT1	-0.31335	3.58349	-3.11353	0.00365178	0.0854124	-1.94815
CNKSR2	-0.394738	1.18139	-3.11219	0.00366479	0.0854522	-1.83635
AL157871.1	-1.51899	-0.701181	-3.11197	0.00366689	0.0854522	-1.99311
CKAP2	-0.295355	2.6636	-3.11155	0.00367099	0.0854522	-1.89733
NPC2	0.292478	6.07187	3.11098	0.00367657	0.0854522	-1.994
POLR2M	-0.448139	3.51952	-3.11074	0.00367884	0.0854522	-1.94962
C5orf24	-0.452349	3.22602	-3.11049	0.00368128	0.0854522	-1.93276
ACOT9	0.288007	4.78603	3.11006	0.00368549	0.0854522	-2.0028
CFL1	0.281088	8.99982	3.10844	0.00370139	0.0857144	-1.92789
MDFIC	-0.400203	4.49924	-3.10671	0.00371841	0.086002	-2.0013
ZNF30	-0.526451	0.570349	-3.1059	0.00372634	0.0860261	-1.85979
CRY1	-0.33759	2.49682	-3.10567	0.00372866	0.0860261	-1.90057
RNF31	0.215441	5.64625	3.10346	0.00375049	0.0863674	-2.01837
FYTTD1	-0.27143	4.47169	-3.10252	0.00375984	0.0863674	-2.01172
C18orf15	0.556361	0.0814211	3.10239	0.00376118	0.0863674	-1.88913
SLC49A3	0.401552	2.64732	3.10228	0.00376227	0.0863674	-1.92185
CU639417.1	0.607815	2.76617	3.10185	0.00376656	0.0863674	-1.93052
AC243960.1	-0.518613	1.87132	-3.10082	0.00377684	0.0864669	-1.87805
VPS36	-0.384492	4.34491	-3.10049	0.00378015	0.0864669	-2.01175
ABCB7	-0.222421	2.8929	-3.09923	0.00379276	0.0866124	-1.94127
MLH3	-0.290046	2.8963	-3.09893	0.00379578	0.0866124	-1.94135
C19orf25	0.183634	4.50038	3.09588	0.00382645	0.0872057	-2.03087
ASGR2	0.590596	3.50603	3.09501	0.00383534	0.0872744	-1.99223
RSPH9	0.67275	-0.306109	3.09423	0.00384327	0.0872744	-1.93995
AC022239.1	-0.831817	0.229784	-3.09421	0.00384347	0.0872744	-1.90498
SH3BGRL3	0.421821	8.38949	3.09223	0.00386356	0.0873983	-1.98084
FCHSD1	0.192146	5.42973	3.09211	0.00386487	0.0873983	-2.0473
ABRAXAS2	-0.233291	3.18936	-3.09176	0.00386844	0.0873983	-1.97704
ZBTB2	-0.270453	3.44978	-3.091	0.00387622	0.0873983	-1.99408
IPO7	-0.377238	4.50942	-3.09099	0.00387626	0.0873983	-2.03911
SPDYA	-0.864049	-1.62121	-3.09092	0.00387699	0.0873983	-2.18956
CFAP97	-0.427653	3.15306	-3.09006	0.00388578	0.0874832	-1.9768
DIMT1	-0.265726	3.63523	-3.08964	0.00389012	0.0874832	-2.00779
KLHL14	-0.884051	0.659615	-3.08882	0.00389861	0.0874923	-1.89464
ARV1	-0.452376	1.02442	-3.08869	0.00389989	0.0874923	-1.88747
COMMD2	-0.279131	3.20126	-3.08701	0.00391726	0.0876352	-1.98846
EZR	-0.301077	6.67471	-3.08646	0.00392295	0.0876352	-2.03871
MAP4K5	-0.355154	3.11838	-3.08642	0.00392332	0.0876352	-1.98393
PTCRA	0.816359	1.71378	3.08544	0.00393352	0.0876352	-1.91016
GNPNAT1	-0.311523	2.15183	-3.08529	0.00393508	0.0876352	-1.92817
SNX5	-0.243178	4.87721	-3.08511	0.00393691	0.0876352	-2.06093
NCBP2	-0.284177	4.42948	-3.08491	0.00393908	0.0876352	-2.05225
LINC01988	0.644749	-1.40842	3.08408	0.00394767	0.0877219	-2.12927
SUCLA2	-0.274953	2.69233	-3.08286	0.00396042	0.0877397	-1.96589
VTA1	-0.269409	3.73071	-3.08271	0.00396198	0.0877397	-2.02923
TFE3	0.303149	6.62049	3.08265	0.00396256	0.0877397	-2.04925
ABCB10	-0.400722	3.01241	-3.08202	0.00396923	0.0877835	-1.98708
METAP1	-0.224854	3.72335	-3.07936	0.00399718	0.0882386	-2.03705
ELP4	-0.229061	2.36148	-3.07888	0.0040022	0.0882386	-1.95528
SDC3	0.680587	1.0769	3.07871	0.00400398	0.0882386	-1.90953
PAQR3	-0.431598	1.49205	-3.07733	0.00401862	0.0884569	-1.91826
LATS1	-0.396011	3.62896	-3.07637	0.0040288	0.0885526	-2.03715
NACC1	0.218108	5.06669	3.07548	0.00403828	0.0885526	-2.08726
MGAT4B	0.294099	5.33364	3.07535	0.00403969	0.0885526	-2.08771
AC006064.1	0.789872	-1.63779	3.07473	0.00404627	0.0885526	-2.19231
AC104695.3	0.62061	-0.151709	3.07417	0.0040523	0.0885526	-1.96516
FASTKD3	-0.299325	1.48924	-3.07406	0.00405346	0.0885526	-1.92606
AP5B1	0.345994	7.33645	3.07338	0.00406071	0.0885526	-2.05275
TAF2	-0.282082	3.32875	-3.07336	0.00406087	0.0885526	-2.02815
CFAP44	-0.425918	1.85634	-3.07154	0.00408047	0.0886464	-1.94422
RECQL	-0.418921	4.12751	-3.07136	0.00408234	0.0886464	-2.0726
NXPH4	-1.20993	-1.59214	-3.0708	0.0040884	0.0886464	-2.22577
SVIP	-0.414519	2.67389	-3.07079	0.00408849	0.0886464	-1.99144
LAMTOR1	0.276376	5.81951	3.07046	0.00409203	0.0886464	-2.09444
RANBP2	-0.345356	5.18489	-3.06984	0.00409879	0.0886464	-2.09854
HAUS3	-0.322971	3.09605	-3.06926	0.00410498	0.0886464	-2.02282
RFX3	-0.361603	2.89219	-3.06923	0.0041054	0.0886464	-2.00927
DNAJC16	-0.264969	3.35762	-3.069	0.00410786	0.0886464	-2.04027
USP6NL	-0.287975	2.55563	-3.06855	0.00411267	0.0886477	-1.99028
LINC02731	0.746607	-0.683834	3.06714	0.00412807	0.0888772	-2.03853
ZNF132	-0.381252	0.428138	-3.06542	0.00414672	0.0890277	-1.94994
PRIMPOL	-0.406554	1.46041	-3.06541	0.00414688	0.0890277	-1.94398
CARF	-0.440337	1.9508	-3.06501	0.00415124	0.0890277	-1.96317
AGPAT2	0.329227	4.60906	3.06448	0.00415705	0.0890277	-2.10805
CWC22	-0.266339	3.64376	-3.06431	0.00415888	0.0890277	-2.06786
AL513548.4	-0.672532	-0.88153	-3.06165	0.00418816	0.0894043	-2.09095
ZNF322	-0.393272	3.01625	-3.0615	0.0041898	0.0894043	-2.03472
ZMYND11	-0.482406	3.83246	-3.0614	0.00419083	0.0894043	-2.08202
SNAI3	0.322031	3.77537	3.06086	0.00419684	0.0894306	-2.0866
GTPBP10	-0.302916	3.01835	-3.05902	0.00421725	0.0896056	-2.04201
TSN	-0.266567	4.46183	-3.05857	0.00422222	0.0896056	-2.11554
NUP42	-0.263456	2.97523	-3.05838	0.00422435	0.0896056	-2.04098
AC007569.1	-0.578512	0.500713	-3.05813	0.00422715	0.0896056	-1.96301
ABCD1	0.240869	4.17339	3.05768	0.00423205	0.0896056	-2.11136
GPSM3	0.38019	8.38881	3.05649	0.00424541	0.0896056	-2.06437
VSIR	0.394305	9.47672	3.05626	0.00424795	0.0896056	-2.03766
CLASRP	0.184054	5.28986	3.05611	0.00424965	0.0896056	-2.13317
SPIN4	-0.59977	0.331479	-3.05586	0.00425245	0.0896056	-1.97595
SBDS	-0.315779	3.2868	-3.05581	0.00425301	0.0896056	-2.06639
CTDSPL2	-0.331021	4.01927	-3.0547	0.00426543	0.0897661	-2.10812
C1R	0.389833	0.728441	3.05274	0.00428746	0.0901283	-1.96663
LAMC1	-0.726994	0.681367	-3.05217	0.00429383	0.0901607	-1.97098
METTL6	-0.281878	1.85434	-3.05174	0.00429875	0.0901627	-1.98938
VPS13C	-0.416857	5.38349	-3.05034	0.00431455	0.0903757	-2.144
GABPA	-0.425068	4.09626	-3.04999	0.00431857	0.0903757	-2.12136
FAM126A	-0.34097	3.28845	-3.0481	0.00434002	0.0905145	-2.08401
ETV6	0.232996	5.64519	3.04806	0.00434044	0.0905145	-2.14961
AC093627.5	-0.376065	0.69775	-3.04751	0.00434675	0.0905145	-1.9793
SMIM14	-0.323283	4.4154	-3.04739	0.00434816	0.0905145	-2.14008
EEA1	-0.414973	2.77918	-3.04688	0.00435392	0.0905145	-2.05311
PBRM1	-0.290873	4.38348	-3.04592	0.0043649	0.0905145	-2.14285
PRMT9	-0.289036	1.66654	-3.04579	0.00436644	0.0905145	-1.99483
TMEM184B	0.295707	5.56776	3.04538	0.00437109	0.0905145	-2.15684
CNTRL	-0.315755	4.99494	-3.0452	0.00437317	0.0905145	-2.15592
ETAA1	-0.492578	1.53513	-3.0451	0.00437438	0.0905145	-1.99069
SRSF6	-0.253386	6.12659	-3.04474	0.00437848	0.0905145	-2.14903
NT5E	-0.653339	2.01066	-3.04415	0.00438526	0.0905545	-2.01134
ABCD2	-0.580782	2.0138	-3.04359	0.00439175	0.0905882	-2.01322
ZNF280D	-0.581568	2.52759	-3.04268	0.00440218	0.0907034	-2.04453
IPO8	-0.255147	4.35321	-3.04054	0.004427	0.0909055	-2.15484
JRKL	-0.429713	1.45825	-3.04035	0.00442928	0.0909055	-1.99911
NBPF12	-0.278232	4.24512	-3.04019	0.00443111	0.0909055	-2.1518
ANKMY2	-0.296226	2.2639	-3.04014	0.00443163	0.0909055	-2.03729
ICK	-0.376236	2.80551	-3.03924	0.00444211	0.0909055	-2.07282
HLA-C	0.410087	11.1403	3.03849	0.00445094	0.0909055	-2.04068
SPRED1	-0.678609	0.779489	-3.03825	0.00445365	0.0909055	-1.99838
SASH3	0.184127	7.60291	3.03802	0.00445638	0.0909055	-2.12848
MRPS30	-0.298229	3.02155	-3.0373	0.00446475	0.0909055	-2.09245
FUBP1	-0.278055	5.02577	-3.03712	0.00446697	0.0909055	-2.17547
NUP54	-0.27696	3.16487	-3.03642	0.00447508	0.0909055	-2.10394
LEMD3	-0.440299	3.9309	-3.03613	0.00447848	0.0909055	-2.14628
NEDD1	-0.387782	2.72038	-3.03565	0.0044842	0.0909055	-2.07523
PDCL3P4	-0.629772	-0.246048	-3.03544	0.00448662	0.0909055	-2.0607
ZBTB33	-0.488845	3.66997	-3.03521	0.00448931	0.0909055	-2.13435
IBTK	-0.357575	3.43437	-3.03517	0.00448982	0.0909055	-2.12284
TOGARAM1	-0.334211	1.93745	-3.03378	0.00450625	0.0911355	-2.03361
DESI2	-0.332904	3.37073	-3.03332	0.00451163	0.0911355	-2.12337
CBLL1	-0.271488	4.2918	-3.03272	0.00451877	0.0911355	-2.17104
SMC4	-0.332857	4.01115	-3.03218	0.00452516	0.0911355	-2.16071
ZNF175	-0.2825	2.20489	-3.03166	0.00453136	0.0911355	-2.05313
RAB8A	0.211197	6.02983	3.03128	0.00453584	0.0911355	-2.18316
GLUD1	-0.233715	5.6843	-3.03097	0.00453945	0.0911355	-2.18824
PWWP2A	-0.237761	3.8647	-3.03091	0.0045402	0.0911355	-2.15767
OS9	0.261921	7.64939	3.02939	0.00455838	0.0912906	-2.1473
AC010894.3	0.500705	0.866743	3.02901	0.00456286	0.0912906	-2.01636
CNR2	-0.450604	3.174	-3.02849	0.00456908	0.0912906	-2.12087
DAAM1	-0.31709	2.22374	-3.02828	0.00457156	0.0912906	-2.06157
AC245884.11	0.498035	1.17915	3.02683	0.00458906	0.0912906	-2.02392
HSPD1	-0.240189	5.42681	-3.02657	0.00459215	0.0912906	-2.20072
C2orf69	-0.44787	2.17136	-3.02631	0.00459528	0.0912906	-2.06186
IPO5	-0.311789	4.71619	-3.02629	0.00459548	0.0912906	-2.19679
AC145098.2	0.544419	1.75209	3.02594	0.00459971	0.0912906	-2.045
MGA	-0.319665	4.10186	-3.02594	0.00459972	0.0912906	-2.17933
MPP5	-0.290734	2.15134	-3.02533	0.00460701	0.0912906	-2.06419
AL021707.1	0.483413	-0.0631974	3.02526	0.00460788	0.0912906	-2.05661
ZNF567	-0.362209	1.24463	-3.02497	0.00461143	0.0912906	-2.02801
TSPYL1	-0.222517	5.35297	-3.02316	0.00463333	0.0916272	-2.20914
CYHR1	0.192695	5.99074	3.0215	0.0046535	0.0917338	-2.20681
SYNCRIP	-0.314109	5.28486	-3.02145	0.00465412	0.0917338	-2.21279
SGPP1	-0.4793	3.11121	-3.02066	0.00466377	0.0917338	-2.13427
METTL14	-0.276336	3.16223	-3.02046	0.0046662	0.0917338	-2.1407
NEPRO	-0.245349	4.10315	-3.02003	0.00467135	0.0917338	-2.19388
RB1	-0.310559	4.1489	-3.01967	0.00467579	0.0917338	-2.19575
INSIG2	-0.397648	2.67534	-3.01937	0.00467942	0.0917338	-2.10941
UAP1	-0.274423	2.46201	-3.01894	0.00468479	0.0917338	-2.09787
PARG	-0.240622	3.18172	-3.01883	0.0046861	0.0917338	-2.14603
CERS4	0.374018	3.61728	3.01753	0.00470211	0.0917338	-2.17953
FAM107B	-0.267635	6.28737	-3.01747	0.00470276	0.0917338	-2.20975
PRAM1	0.393241	6.45093	3.01714	0.00470684	0.0917338	-2.20724
RIF1	-0.454417	4.11346	-3.01663	0.00471307	0.0917338	-2.19984
RUFY2	-0.239389	2.29882	-3.01646	0.00471522	0.0917338	-2.0934
MRPS31P4	-1.45518	-1.96212	-3.01644	0.0047155	0.0917338	-2.38964
FAM229A	0.230291	3.33641	3.01606	0.00472013	0.0917338	-2.16564
DHRS7B	0.285097	3.01164	3.0159	0.00472217	0.0917338	-2.14498
C12orf42	-0.646009	-0.661333	-3.01357	0.00475103	0.0921954	-2.14991
AP001372.2	-0.579267	-0.327251	-3.01318	0.0047558	0.0921954	-2.11084
GPR18	-0.418846	2.29651	-3.01148	0.00477698	0.0925101	-2.10339
AMMECR1	-0.284015	2.39275	-3.01051	0.0047891	0.0926488	-2.11256
IMPA1	-0.396525	2.80095	-3.01	0.0047955	0.0926766	-2.13937
IGIP	-0.500083	1.88103	-3.00873	0.00481145	0.0927053	-2.08555
ZNF566	-0.254201	2.04183	-3.00823	0.0048177	0.0927053	-2.09685
ADH5	-0.338552	4.13932	-3.00815	0.00481871	0.0927053	-2.22213
SIPA1	0.247902	7.62578	3.00794	0.00482133	0.0927053	-2.19776
RRAGB	-0.387102	1.51902	-3.00791	0.00482179	0.0927053	-2.07263
AC010733.2	-0.248171	4.23769	-3.00681	0.00483558	0.0927129	-2.22993
AFG3L2	-0.241343	3.89396	-3.00665	0.00483759	0.0927129	-2.21566
NEMF	-0.220332	4.6618	-3.00661	0.00483812	0.0927129	-2.2426
PTCH1	-0.465984	2.48388	-3.00624	0.00484276	0.0927129	-2.12663
NAPA	0.436268	6.4491	3.00591	0.00484699	0.0927129	-2.23347
UBA2	-0.271449	4.55516	-3.00442	0.00486586	0.0928972	-2.24488
GPN3	-0.369432	2.08494	-3.00437	0.00486657	0.0928972	-2.10676
CAPN7	-0.387508	3.30352	-3.00334	0.00487962	0.0929547	-2.18791
MNAT1	-0.431514	0.692747	-3.0033	0.00488008	0.0929547	-2.07275
SMARCD3	0.369788	4.50503	3.00296	0.0048845	0.0929547	-2.25027
PHTF2	-0.581752	3.25119	-2.9997	0.00492621	0.0934098	-2.19008
NDUFAF7	-0.278172	2.40385	-2.99967	0.00492659	0.0934098	-2.13769
ATP10D	-0.434978	2.99386	-2.99956	0.00492797	0.0934098	-2.17552
CEP192	-0.458648	3.72885	-2.99925	0.00493201	0.0934098	-2.22177
C12orf4	-0.366826	2.1311	-2.99885	0.00493707	0.0934098	-2.12196
ERCC8	-0.415208	0.686456	-2.99875	0.0049384	0.0934098	-2.08239
FOPNL	-0.344456	2.69937	-2.99804	0.00494757	0.0934886	-2.16035
CA4	0.731652	3.6406	2.99729	0.00495728	0.0935714	-2.22796
ZNF736	-0.434996	2.94479	-2.99692	0.00496197	0.0935714	-2.17826
CCDC97	0.180715	5.26414	2.99624	0.00497075	0.0936425	-2.27378
HMGB1P6	-0.452837	2.9087	-2.99561	0.00497893	0.0936504	-2.17913
RAD1	-0.234966	2.7252	-2.99479	0.00498966	0.0936504	-2.17063
PTPN18	0.23756	6.60027	2.99461	0.00499199	0.0936504	-2.25618
MVB12A	0.235066	3.33356	2.9939	0.00500126	0.0936504	-2.21673
TRAPPC1	0.310285	5.92887	2.99384	0.00500204	0.0936504	-2.27261
URI1	-0.3159	4.02319	-2.99345	0.00500703	0.0936504	-2.25161
GATAD2A	0.226136	6.25454	2.99332	0.00500884	0.0936504	-2.26732
PHF6	-0.395549	2.93465	-2.99313	0.00501126	0.0936504	-2.18685
ARID5B	-0.327362	3.7089	-2.99201	0.00502592	0.0938305	-2.23915
ITGB1	-0.341175	6.7758	-2.99158	0.00503151	0.0938411	-2.2585
IFT80	-0.494743	2.31449	-2.99099	0.00503924	0.0938731	-2.14956
DEK	-0.426922	5.28843	-2.99025	0.00504907	0.0938731	-2.28501
ACADSB	-0.339032	2.8366	-2.99011	0.00505078	0.0938731	-2.18782
ATAD2	-0.392677	2.31218	-2.98992	0.00505332	0.0938731	-2.15273
MTX2	-0.414832	0.98757	-2.98886	0.00506727	0.0939944	-2.10231
MICU3	-0.823051	-1.13826	-2.9884	0.00507337	0.0939944	-2.26841
CEP85	-0.265881	2.88953	-2.98828	0.00507493	0.0939944	-2.19632
SRSF10	-0.372312	5.056	-2.9877	0.00508262	0.0940436	-2.29064
ZNF568	-0.298558	1.66672	-2.98534	0.00511392	0.0945291	-2.12869
WBP2	0.389346	7.55053	2.9839	0.00513312	0.0946177	-2.25538
ABLIM3	1.03775	1.88423	2.9839	0.00513321	0.0946177	-2.14486
AC004771.3	-0.596116	-1.71427	-2.98384	0.0051339	0.0946177	-2.37805
HNRNPH1	-0.290343	7.61532	-2.98329	0.00514133	0.0946612	-2.25519
SEPSECS	-0.411273	2.20431	-2.98208	0.00515754	0.0948663	-2.16345
COPE	0.265234	6.3609	2.98127	0.00516838	0.0949374	-2.29293
EED	-0.253409	2.93849	-2.98082	0.00517445	0.0949374	-2.21692
AASS	-0.446088	0.40863	-2.98053	0.00517835	0.0949374	-2.12679
EPN1	0.268245	6.07988	2.97999	0.00518559	0.0949374	-2.30197
HNRNPR	-0.250033	5.64032	-2.97981	0.00518804	0.0949374	-2.30825
LRG1	0.455752	6.56294	2.9789	0.00520029	0.0949374	-2.29348
MMP9	0.814589	7.09661	2.97812	0.00521088	0.0949374	-2.28087
ZCCHC18	-0.577342	0.314105	-2.97809	0.00521128	0.0949374	-2.13603
CDH23	0.239367	4.79934	2.97776	0.00521579	0.0949374	-2.31439
HHAT	-0.50096	0.216972	-2.97697	0.00522653	0.0949374	-2.14193
MAX	0.189881	6.84127	2.97668	0.00523042	0.0949374	-2.29159
ZNF664	-0.290651	4.11173	-2.97658	0.00523183	0.0949374	-2.29485
DDX5	-0.250212	8.96504	-2.97629	0.00523572	0.0949374	-2.23452
AL606500.1	0.672661	-0.424479	2.97607	0.00523873	0.0949374	-2.18369
PIGK	-0.413336	2.92944	-2.97525	0.00524987	0.0949374	-2.22706
CD69	-0.790286	1.00695	-2.97475	0.00525673	0.0949374	-2.13207
SESN1	-0.453846	3.47095	-2.97459	0.00525896	0.0949374	-2.26363
ANP32E	-0.385092	4.39307	-2.97437	0.00526191	0.0949374	-2.30927
SAP25	0.434027	4.01483	2.97432	0.00526261	0.0949374	-2.30004
AC007384.1	-0.440624	0.589059	-2.974	0.00526699	0.0949374	-2.13569
CR786580.1	0.638996	0.90803	2.97322	0.00527766	0.0949374	-2.13553
SDK2	-0.663296	1.09897	-2.97313	0.00527897	0.0949374	-2.13673
ARHGAP45	0.201442	9.1813	2.97298	0.00528094	0.0949374	-2.23626
AL162431.1	0.514682	0.19255	2.97281	0.00528333	0.0949374	-2.14795
TM9SF3	-0.294356	5.48016	-2.97224	0.00529118	0.0949872	-2.32702
ZNF623	-0.261192	3.52066	-2.97163	0.00529955	0.095046	-2.27607
DCAF17	-0.412107	2.76373	-2.97119	0.00530559	0.0950631	-2.2251
TMEM87B	-0.342646	3.61885	-2.96994	0.0053228	0.0952801	-2.2847
ZNF721	-0.466094	2.67803	-2.96934	0.00533107	0.0952938	-2.22248
GSDMD	0.209695	6.32675	2.96905	0.0053351	0.0952938	-2.32204
TAF1B	-0.357213	1.61818	-2.96851	0.00534258	0.0952938	-2.16285
KLF12	-0.576479	3.87538	-2.9684	0.00534412	0.0952938	-2.2991
TNK2	0.167365	6.70731	2.968	0.00534964	0.0952938	-2.31516
RNF125	-0.30146	4.49645	-2.96768	0.00535416	0.0952938	-2.32865
C12orf29	-0.47715	1.74661	-2.96684	0.0053659	0.0953334	-2.17174
KCNE1	0.576173	2.58136	2.96679	0.00536658	0.0953334	-2.22813
ARHGAP9	0.383691	8.4051	2.96591	0.00537885	0.0954137	-2.27303
STAG1	-0.236681	4.30075	-2.96545	0.00538519	0.0954137	-2.32829
SNHG1	-0.292245	3.98628	-2.96419	0.0054028	0.0954137	-2.31804
MPC1	-0.247089	3.00621	-2.96413	0.00540366	0.0954137	-2.25964
PXN-AS1	0.372856	1.89678	2.96407	0.00540461	0.0954137	-2.18979
KIAA0319L	0.277396	6.27378	2.96378	0.0054086	0.0954137	-2.33546
ZNF224	-0.282077	4.18204	-2.96365	0.00541037	0.0954137	-2.32763
CEP57L1	-0.37857	0.164595	-2.96317	0.00541711	0.0954137	-2.17153
TNFRSF12A	0.539847	1.27422	2.96285	0.00542167	0.0954137	-2.16494
MRFAP1L1	-0.254935	4.71851	-2.96281	0.00542216	0.0954137	-2.34534
HSPA9	-0.25402	5.71372	-2.96203	0.00543323	0.0954198	-2.34867
LRFN1	0.385377	4.1762	2.96186	0.00543565	0.0954198	-2.3354
KLHL9	-0.367784	3.78081	-2.96162	0.00543892	0.0954198	-2.3125
LCAT	0.283271	2.04483	2.96134	0.00544293	0.0954198	-2.20425
MRPS18C	-0.419273	2.11229	-2.96012	0.00546025	0.0954363	-2.20708
LINC02680	0.573905	-0.108387	2.95958	0.00546786	0.0954363	-2.19058
CHD1L	-0.252733	3.8228	-2.95853	0.00548273	0.0954363	-2.32337
FADD	0.323068	4.84521	2.95779	0.0054933	0.0954363	-2.36153
FAM117B	-0.344043	3.73482	-2.95753	0.00549695	0.0954363	-2.31961
ADNP	-0.246396	5.36977	-2.95709	0.00550325	0.0954363	-2.36298
MLLT10	-0.312056	3.35583	-2.95648	0.00551192	0.0954363	-2.29976
PLCB2	0.241947	7.95655	2.95633	0.00551413	0.0954363	-2.30752
TENT4B	-0.267343	3.35169	-2.95632	0.00551428	0.0954363	-2.30029
NUP88	-0.293526	3.79768	-2.95623	0.00551548	0.0954363	-2.32692
SOCS5	-0.360098	2.30434	-2.95575	0.00552236	0.0954363	-2.22924
AL050341.2	-0.538517	-0.0687171	-2.9554	0.00552732	0.0954363	-2.20231
BTBD1	-0.284589	4.24203	-2.95471	0.0055372	0.0954363	-2.35049
WASL	-0.321171	1.96161	-2.95458	0.0055391	0.0954363	-2.21114
CSNK1G2	0.180914	6.86962	2.95404	0.00554692	0.0954363	-2.34313
CDC14A	-0.455145	3.23786	-2.95393	0.00554848	0.0954363	-2.29593
UBA6	-0.430072	3.95574	-2.95322	0.0055587	0.0954363	-2.33995
TIMP1	0.530758	5.57876	2.95292	0.00556307	0.0954363	-2.3727
TARDBP	-0.169335	5.85938	-2.95262	0.00556738	0.0954363	-2.36871
NRAS	-0.357785	4.11245	-2.9526	0.00556765	0.0954363	-2.3494
HP1BP3	-0.251533	6.4137	-2.95203	0.00557581	0.0954363	-2.35901
PDCD4-AS1	0.36242	2.47054	2.95167	0.00558103	0.0954363	-2.25404
RNPEPL1	0.267353	7.34699	2.95162	0.0055817	0.0954363	-2.3355
RALA	-0.239938	3.57663	-2.95155	0.00558276	0.0954363	-2.32559
CAAP1	-0.348639	2.21977	-2.95114	0.00558872	0.0954363	-2.23428
MAP3K3	0.269581	7.22166	2.95113	0.0055889	0.0954363	-2.34015
CDA	0.575689	6.25721	2.95066	0.00559558	0.0954363	-2.36601
CAMSAP1	-0.299533	3.17059	-2.95053	0.0055975	0.0954363	-2.30114
TGFB1	0.309799	8.14753	2.95053	0.00559752	0.0954363	-2.31538
CMTR2	-0.408766	3.4483	-2.95031	0.00560068	0.0954363	-2.31842
GMIP	0.26283	7.61972	2.95021	0.00560219	0.0954363	-2.33104
BET1	-0.294862	2.34334	-2.9493	0.00561541	0.0955745	-2.24708
HS2ST1	-0.396592	3.18871	-2.94883	0.00562221	0.0955894	-2.30502
ARID1B	-0.243787	5.06176	-2.94825	0.0056306	0.0955894	-2.38317
SLC30A4	-0.258652	1.95124	-2.94818	0.00563163	0.0955894	-2.22534
RBIS	-0.572782	1.28547	-2.94735	0.00564373	0.0955949	-2.19584
TUBA4A	0.411511	6.74129	2.94652	0.00565587	0.0955949	-2.36375
RHOG	0.383664	7.47477	2.94634	0.00565852	0.0955949	-2.34393
RBBP9	-0.298026	2.00902	-2.94614	0.00566145	0.0955949	-2.23288
FAM210A	-0.308111	1.60477	-2.94613	0.00566162	0.0955949	-2.21154
HIST2H2AA3	0.742997	3.46418	2.94606	0.00566265	0.0955949	-2.33552
ARL1	-0.290296	2.67269	-2.94563	0.0056689	0.0956141	-2.27783
DNM2	0.205063	7.68596	2.94509	0.00567686	0.095662	-2.34092
HCN3	-0.577161	-0.457267	-2.94362	0.0056985	0.095902	-2.25803
SACM1L	-0.341808	4.84451	-2.94343	0.00570136	0.095902	-2.39145
ZNF451	-0.320728	3.81465	-2.9424	0.0057165	0.0959496	-2.35913
ARRB2	0.326107	8.78965	2.94136	0.0057319	0.0959496	-2.31855
ZNF33B	-0.303517	3.67712	-2.94116	0.00573493	0.0959496	-2.35472
JAKMIP2	-0.46363	1.60809	-2.94071	0.00574148	0.0959496	-2.22299
CASD1	-0.449777	2.65962	-2.94051	0.00574449	0.0959496	-2.28658
PDLIM7	0.419269	6.60702	2.93978	0.0057554	0.0959496	-2.38275
MTDH	-0.243947	5.64935	-2.9395	0.00575959	0.0959496	-2.40157
YIPF1	0.259508	4.48908	2.93929	0.00576266	0.0959496	-2.39731
HAUS6	-0.354359	2.98829	-2.93907	0.00576593	0.0959496	-2.31411
TCEAL1	-0.592874	0.151263	-2.93852	0.0057742	0.0959496	-2.22332
PNPLA8	-0.412066	4.01069	-2.93826	0.00577802	0.0959496	-2.37731
RENBP	0.332543	4.53034	2.93766	0.00578691	0.0959496	-2.40229
GLOD4	-0.256361	4.30913	-2.93751	0.00578927	0.0959496	-2.39294
ZNF761	-0.480456	2.07365	-2.93746	0.00578998	0.0959496	-2.25391
ANKRD12	-0.287759	6.54278	-2.93718	0.00579414	0.0959496	-2.39009
C3orf52	-0.560224	-0.73365	-2.93705	0.00579615	0.0959496	-2.30113
B3GALNT2	-0.370749	2.30936	-2.9368	0.00579991	0.0959496	-2.27224
PEAR1	0.85201	0.933716	2.93678	0.00580009	0.0959496	-2.21304
SIGLEC16	0.355401	1.10586	2.93667	0.00580175	0.0959496	-2.21646
AC240565.2	0.752261	4.57356	2.93548	0.00581967	0.0960257	-2.40821
DHX15	-0.224413	5.35324	-2.93543	0.00582036	0.0960257	-2.41319
CAMTA2	0.231877	5.77525	2.93489	0.0058285	0.0960257	-2.41171
ATXN7L3	0.161322	6.13122	2.93445	0.00583508	0.0960257	-2.40622
CCT8P1	-0.690532	-1.50313	-2.93409	0.00584051	0.0960257	-2.42643
SLC25A36	-0.457816	3.46684	-2.93408	0.0058408	0.0960257	-2.3561
INSL3	0.650092	0.309428	2.93397	0.00584232	0.0960257	-2.22267
PAXBP1	-0.401936	3.52172	-2.93204	0.00587152	0.0961544	-2.36503
DENND1C	0.235275	6.0383	2.93144	0.00588061	0.0961544	-2.41507
BACH1-IT1	0.751367	-1.77242	2.93116	0.00588491	0.0961544	-2.46091
SEPTIN5	0.660974	2.53439	2.93061	0.00589326	0.0961544	-2.30628
MED15	0.167473	6.39125	2.92893	0.00591882	0.0961544	-2.41309
RBM12B	-0.397392	3.13494	-2.92821	0.00592984	0.0961544	-2.34827
CBFB	-0.309201	4.68727	-2.9279	0.00593461	0.0961544	-2.42479
MAP11	0.303584	5.96503	2.92756	0.00593992	0.0961544	-2.42545
TMTC4	-0.360352	1.58522	-2.92727	0.00594423	0.0961544	-2.25124
ANKRD46	-0.405722	1.89742	-2.92724	0.00594477	0.0961544	-2.26679
ZNF546	-0.26806	1.94182	-2.92721	0.00594523	0.0961544	-2.27086
RAD18	-0.265933	1.9423	-2.92718	0.00594562	0.0961544	-2.27086
F5	0.480892	4.60811	2.92715	0.00594616	0.0961544	-2.42848
CNST	-0.349468	3.92657	-2.92664	0.00595401	0.0961544	-2.40066
ETNK1	-0.464595	4.68801	-2.92658	0.00595484	0.0961544	-2.42634
LZTFL1	-0.343509	1.89831	-2.92631	0.00595907	0.0961544	-2.2696
ZNF737	-0.331639	3.05361	-2.92604	0.00596312	0.0961544	-2.34827
AKAP7	-0.435476	1.5376	-2.92599	0.00596392	0.0961544	-2.25143
ITGB5	0.852661	2.78739	2.92586	0.00596598	0.0961544	-2.33478
MAPKAPK2	0.293469	6.51125	2.92572	0.00596814	0.0961544	-2.41755
MCPH1	-0.214844	3.10865	-2.92554	0.00597081	0.0961544	-2.35483
ZMYND15	0.542067	1.14473	2.92534	0.00597397	0.0961544	-2.24175
TMUB2	0.227019	5.35396	2.92517	0.00597654	0.0961544	-2.43837
TCERG1	-0.338033	3.96177	-2.92481	0.00598215	0.0961544	-2.40672
HS1BP3	0.252883	4.64599	2.9248	0.00598221	0.0961544	-2.43431
CTLA4	-0.484053	1.28981	-2.92382	0.00599747	0.0961544	-2.24691
CHMP2A	0.389841	6.69108	2.92358	0.0060011	0.0961544	-2.41779
ZNF782	-0.395038	0.854837	-2.92305	0.00600939	0.0961544	-2.2404
PSMB10	0.285007	6.25836	2.92267	0.00601529	0.0961544	-2.43059
SPON1	-0.586671	-0.293436	-2.92248	0.00601813	0.0961544	-2.28433
RANBP6	-0.490137	3.16757	-2.92246	0.00601851	0.0961544	-2.36235
ALDOA	0.349287	8.91308	2.92233	0.00602054	0.0961544	-2.35831
AC245060.5	-1.02638	0.835536	-2.92192	0.00602687	0.0961544	-2.2424
GSE1	-0.326586	4.45582	-2.92186	0.00602779	0.0961544	-2.433
COASY	0.182194	5.14818	2.9217	0.00603023	0.0961544	-2.44659
U73166.1	0.513065	0.367335	2.91918	0.00606951	0.0966651	-2.25137
TFRC	-0.30142	3.40948	-2.91832	0.00608293	0.0966651	-2.3904
REM2	0.493599	4.03252	2.91832	0.00608308	0.0966651	-2.4298
PLGLB1	-0.728162	0.932939	-2.91779	0.00609131	0.0966651	-2.25185
ZNF80	-0.69853	-0.561616	-2.91771	0.00609263	0.0966651	-2.31877
TSKS	-1.01533	-1.18023	-2.91766	0.0060933	0.0966651	-2.40701
SLC35B1	0.198945	3.44374	2.91695	0.00610458	0.0967151	-2.39979
DYNLRB1	0.270972	4.70436	2.91654	0.00611103	0.0967151	-2.4545
AL021368.2	-0.561878	1.17128	-2.91648	0.00611197	0.0967151	-2.25874
OPRL1	0.338485	3.74142	2.91513	0.00613325	0.0969696	-2.42219
EXOC5	-0.340823	4.0853	-2.91336	0.00616124	0.0973299	-2.43848
GHR	0.504401	-0.954636	2.91129	0.00619405	0.0976777	-2.3652
AGGF1	-0.25632	3.76586	-2.91102	0.0061984	0.0976777	-2.42894
FAM214A	-0.374409	4.20331	-2.91093	0.00619988	0.0976777	-2.44869
FCGR3A	0.565436	8.62649	2.91041	0.00620808	0.0976777	-2.39295
NEMP1	-0.378969	2.91754	-2.9099	0.00621626	0.0976777	-2.37458
CLDN12	-0.606646	-0.752375	-2.90976	0.00621847	0.0976777	-2.35315
NCAPD3	-0.328037	3.07674	-2.90968	0.00621984	0.0976777	-2.38714
SLF2	-0.254561	3.98956	-2.90873	0.00623499	0.0978333	-2.44569
TMEM161B	-0.415093	2.40933	-2.90792	0.0062481	0.0979568	-2.3422
ITGAD	0.734732	0.0764236	2.90732	0.00625773	0.0980255	-2.28445
ZNF85	-0.457136	0.215419	-2.90686	0.00626515	0.0980595	-2.28295
NFX1	-0.187417	4.62997	-2.90592	0.0062803	0.0982145	-2.47515
SRP72	-0.32806	4.97263	-2.90522	0.00629163	0.0982457	-2.48095
PREPL	-0.372629	3.40213	-2.90514	0.00629282	0.0982457	-2.41906
AC116353.6	0.522813	0.844452	2.90431	0.00630625	0.0983733	-2.2801
SBNO1	-0.169868	5.03663	-2.90357	0.00631821	0.0984777	-2.4863
PUM2	-0.312598	6.22286	-2.90263	0.0063336	0.098489	-2.47663
HTD2	0.469565	1.99044	2.90259	0.00633425	0.098489	-2.33107
AL365361.1	-0.443517	3.99821	-2.90256	0.00633475	0.098489	-2.45795
PPP1R11	0.198835	5.49641	2.90159	0.00635051	0.0986258	-2.4915
KLHL28	-0.429003	3.12233	-2.90137	0.0063541	0.0986258	-2.40755
BORCS8-MEF2B	0.415734	2.52343	2.90097	0.00636068	0.098646	-2.3714
ZNF22	-0.560026	2.61583	-2.90016	0.00637391	0.0986982	-2.37216
CLECL1	-1.07874	-1.50124	-2.90011	0.00637474	0.0986982	-2.49257
NUCKS1	-0.284191	5.29322	-2.89971	0.00638119	0.0986982	-2.49511
BIN2	0.237749	8.1371	2.89934	0.00638739	0.0986982	-2.43214
FLCN	0.192121	5.37103	2.89915	0.00639046	0.0986982	-2.49797
THAP9	-0.644287	-0.190814	-2.89852	0.00640085	0.0987771	-2.32331
IKZF3	-0.328051	6.10326	-2.89809	0.0064078	0.0988027	-2.48937
EBLN3P	-0.400362	4.95762	-2.89654	0.00643339	0.0991156	-2.50004
PMF1-BGLAP	0.442594	1.32838	2.89607	0.00644119	0.0991539	-2.3103
TRIP6	0.281937	1.84469	2.89478	0.00646245	0.0992289	-2.33876
ZNF234	-0.301621	2.2416	-2.89462	0.00646525	0.0992289	-2.36138
PGLS	0.235751	5.41525	2.89416	0.00647284	0.0992289	-2.5092
RTN2	0.554908	2.71126	2.89354	0.00648319	0.0992289	-2.40204
USP46	-0.355298	1.61841	-2.89341	0.00648525	0.0992289	-2.32608
G3BP2	-0.28594	5.60163	-2.89324	0.00648811	0.0992289	-2.50813
TAP1	0.270855	7.75128	2.89267	0.00649754	0.0992289	-2.45836
BAIAP2L2	0.482646	-0.954468	2.89242	0.00650186	0.0992289	-2.39922
PPWD1	-0.309954	3.82835	-2.89209	0.00650736	0.0992289	-2.47503
BATF2	0.804251	2.20897	2.89204	0.00650809	0.0992289	-2.36906
ATP6AP1	0.257374	6.15854	2.89176	0.00651285	0.0992289	-2.50356
AL356356.1	0.626947	1.08969	2.89174	0.00651318	0.0992289	-2.31154
CD151	0.583113	4.51986	2.89162	0.00651508	0.0992289	-2.50785
NUP133	-0.243486	3.91273	-2.89082	0.00652859	0.0993536	-2.48294
RCHY1	-0.291131	3.27859	-2.88816	0.00657316	0.0999505	-2.44999
CHM	-0.387916	2.52632	-2.88726	0.00658832	0.10008	-2.39689
SLC25A44	0.285423	5.8668	2.88679	0.00659625	0.10008	-2.52059
NAA35	-0.276737	2.65577	-2.88631	0.00660443	0.10008	-2.40973
RIC8A	0.155381	5.5729	2.88628	0.00660485	0.10008	-2.5257
FOXJ3	-0.19916	4.73374	-2.88607	0.00660847	0.10008	-2.52246
RNF19A	-0.320872	4.669	-2.88487	0.00662892	0.100301	-2.52297
CMTM3	0.208554	5.62413	2.88458	0.00663377	0.100301	-2.52911
ACADM	-0.415603	3.04609	-2.88378	0.00664743	0.100426	-2.44214
DOK3	0.369397	7.61431	2.88322	0.00665692	0.100488	-2.48369
TREML3P	0.91221	1.11447	2.88217	0.00667484	0.10061	-2.33241
SPDL1	-0.526954	0.805252	-2.88212	0.00667575	0.10061	-2.32499
TYW3	-0.3485	2.54713	-2.88116	0.00669216	0.10065	-2.41216
PDLIM2	0.213074	6.17154	2.881	0.00669485	0.10065	-2.52779
G3BP1	-0.228711	5.62304	-2.88084	0.00669767	0.10065	-2.53647
ATMIN	-0.242794	4.03121	-2.8807	0.00669994	0.10065	-2.51169
AC008555.5	0.81044	-1.96193	2.87879	0.00673284	0.100981	-2.58152
CGGBP1	-0.308634	5.58633	-2.87842	0.0067393	0.100981	-2.54199
FAM98A	-0.225329	2.85677	-2.878	0.00674644	0.100981	-2.44331
UHMK1	-0.386881	5.64556	-2.87795	0.0067473	0.100981	-2.54208
FRS2	-0.366122	2.72313	-2.87786	0.00674897	0.100981	-2.43199
WDR70	-0.220683	3.02283	-2.87708	0.00676232	0.100995	-2.4577
CD7	0.361136	5.89227	2.87708	0.00676232	0.100995	-2.54231
CSNK1G3	-0.437765	2.85144	-2.87686	0.00676613	0.100995	-2.44291
VAMP4	-0.372763	3.1635	-2.87622	0.00677726	0.100995	-2.4678
SPTY2D1	-0.263356	4.14014	-2.8761	0.00677943	0.100995	-2.52664
CIP2A	-0.581825	-0.408127	-2.87585	0.00678365	0.100995	-2.38163
CEBPZ	-0.447526	3.44549	-2.87562	0.00678778	0.100995	-2.48754
PEAK3	0.449389	4.5346	2.87478	0.00680228	0.101131	-2.54659
MRPS10	-0.185951	3.38926	-2.87413	0.0068136	0.101174	-2.49045
ITGAX	0.393874	8.86196	2.87381	0.00681917	0.101174	-2.46885
ZXDA	-0.53938	0.188733	-2.87365	0.00682191	0.101174	-2.35056
NRADDP	0.598075	-0.823095	2.87337	0.00682684	0.101174	-2.41814
SLC5A3	-0.422061	3.043	-2.87306	0.00683229	0.101174	-2.46553
CUEDC1	0.374595	4.28658	2.87275	0.00683767	0.101174	-2.5437
LINC01271	0.92241	-0.411186	2.872	0.00685078	0.10123	-2.38196
PHC3	-0.328551	5.26045	-2.87188	0.00685294	0.10123	-2.55837
TIMM17A	-0.299582	2.92192	-2.87161	0.00685772	0.10123	-2.46189
ZNF318	-0.360641	3.99053	-2.86988	0.00688801	0.101463	-2.53287
AC118549.1	-0.412583	3.12114	-2.86952	0.00689442	0.101463	-2.47938
DENND11	-0.397008	4.48363	-2.86917	0.0069006	0.101463	-2.55331
AQP11	-0.567549	-1.38095	-2.86901	0.00690334	0.101463	-2.51284
PAK1IP1	-0.311876	1.48996	-2.86862	0.00691028	0.101463	-2.37334
TMPO	-0.346119	5.50339	-2.86851	0.00691219	0.101463	-2.56505
SELENOI	-0.367761	2.33016	-2.8685	0.00691231	0.101463	-2.42437
ITGA2B	1.17876	4.54723	2.86824	0.00691698	0.101463	-2.55957
GON7	-0.544525	0.534466	-2.86793	0.00692247	0.101464	-2.35429
NCBP1	-0.25789	3.88114	-2.8666	0.00694603	0.101543	-2.53608
BOD1	-0.331189	2.18049	-2.86649	0.00694807	0.101543	-2.41863
DGAT1	0.282552	5.3701	2.86647	0.00694829	0.101543	-2.5727
PYROXD1	-0.418014	3.10198	-2.8664	0.00694954	0.101543	-2.48488
ATR	-0.255141	4.07446	-2.866	0.0069566	0.101566	-2.54684
PRPF39	-0.459407	3.07526	-2.86524	0.00697028	0.101687	-2.48498
GCSAM	-0.323883	2.46142	-2.86373	0.00699716	0.101999	-2.44512
TRAPPC11	-0.218537	4.19873	-2.86316	0.00700733	0.102068	-2.55887
PLIN3	0.324735	5.93211	2.86142	0.00703851	0.102442	-2.5772
AP000769.1	0.449659	1.28413	2.85915	0.00707948	0.102939	-2.38706
ARID2	-0.250843	3.8548	-2.85783	0.00710334	0.102939	-2.55443
RORA	-0.496379	4.60436	-2.85774	0.00710494	0.102939	-2.58144
ADAM28	-0.459758	3.23275	-2.8575	0.00710935	0.102939	-2.51403
POU2AF1	-0.454316	3.99092	-2.85742	0.00711066	0.102939	-2.56014
SH3BGRL2	0.750044	2.97004	2.85742	0.00711078	0.102939	-2.50188
KLHDC1	-0.506591	0.454767	-2.85651	0.00712728	0.102939	-2.37815
AP000428.2	0.538	-1.18867	2.85588	0.0071387	0.102939	-2.49457
PDIK1L	-0.453807	1.91085	-2.85584	0.00713938	0.102939	-2.42265
KCNQ1	0.242838	4.89715	2.85556	0.00714455	0.102939	-2.59634
ICE1	-0.334365	4.08594	-2.85538	0.00714773	0.102939	-2.57039
ZNF800	-0.248063	3.80609	-2.85528	0.00714955	0.102939	-2.55754
CLASP2	-0.261813	3.84498	-2.8552	0.00715111	0.102939	-2.55977
B3GALT4	0.236322	3.68283	2.85494	0.0071558	0.102939	-2.55499
PSIP1	-0.218526	5.56327	-2.85473	0.00715975	0.102939	-2.59647
APOL1	0.365147	5.12391	2.85467	0.00716077	0.102939	-2.60002
TMEM150B	0.404157	1.87781	2.85367	0.00717902	0.10307	-2.43051
KCNAB1	-0.661048	-1.55693	-2.85327	0.0071864	0.10307	-2.56631
YPEL3	0.367643	8.08085	2.85327	0.00718645	0.10307	-2.53743
SSB	-0.312675	3.91488	-2.85243	0.00720184	0.103212	-2.56924
WAS	0.345267	7.70442	2.85169	0.00721544	0.103273	-2.55214
RNASEK	0.307603	6.73962	2.85159	0.00721719	0.103273	-2.5803
TRAP1	-0.316843	4.05929	-2.85008	0.00724504	0.103592	-2.58162
TMEM18	-0.266094	3.02516	-2.84871	0.00727032	0.103818	-2.52063
THUMPD1	-0.294525	4.36948	-2.8484	0.00727612	0.103818	-2.59788
AC138150.2	0.489033	0.281326	2.84832	0.00727751	0.103818	-2.39598
GABARAP	0.397586	7.61637	2.84739	0.00729474	0.103893	-2.56435
EEF1AKMT2	-0.31679	1.60356	-2.84675	0.00730672	0.103893	-2.42582
MOSMO	-0.370751	2.15872	-2.84662	0.00730911	0.103893	-2.46
INSC	0.834482	-0.961995	2.84612	0.00731846	0.103893	-2.48296
API5	-0.314253	5.14199	-2.84579	0.00732453	0.103893	-2.6175
ZNF131	-0.284368	3.62843	-2.84537	0.00733253	0.103893	-2.56918
POLR2E	0.219541	5.96314	2.84534	0.00733299	0.103893	-2.61299
TBCK	-0.259146	2.47722	-2.84506	0.00733819	0.103893	-2.48773
TOMM5	-0.445243	1.34945	-2.84503	0.00733885	0.103893	-2.41672
RBMX	-0.257817	6.04317	-2.84473	0.00734445	0.103893	-2.61202
NDUFA5	-0.504465	1.89601	-2.84446	0.00734942	0.103893	-2.44661
C18orf54	-0.496429	0.0114114	-2.84446	0.00734947	0.103893	-2.41428
FCRL5	-0.806554	3.39081	-2.84378	0.00736219	0.103916	-2.54998
LRCH1	-0.289979	2.73631	-2.84283	0.00738009	0.103916	-2.51181
DBF4	-0.266912	2.00064	-2.84281	0.00738043	0.103916	-2.45866
TRMT44	-0.25289	2.1532	-2.84279	0.00738084	0.103916	-2.46938
CBR4	-0.274586	2.87854	-2.84246	0.00738687	0.103916	-2.52352
AC010894.5	0.381557	1.64118	2.84242	0.00738775	0.103916	-2.44023
RDX	-0.289275	2.55365	-2.8423	0.00739001	0.103916	-2.49914
ERI1	-0.256721	2.77458	-2.84199	0.00739586	0.10392	-2.51703
CXCR5	-0.499533	4.39531	-2.84136	0.00740775	0.10396	-2.61267
ZNF235	-0.370585	1.26843	-2.84112	0.00741214	0.10396	-2.42202
SKP2	-0.218155	2.48539	-2.84095	0.00741541	0.10396	-2.49765
AL138778.1	-0.60358	-1.28169	-2.83982	0.00743674	0.104181	-2.54539
UPRT	-0.26758	1.83428	-2.83915	0.00744934	0.104253	-2.45587
AC008124.1	-0.30382	3.05793	-2.83896	0.00745302	0.104253	-2.54431
AC006230.1	-0.769352	-1.44804	-2.83852	0.00746127	0.10427	-2.57525
MFSD12	0.164507	5.0452	2.83831	0.00746538	0.10427	-2.63637
NRGN	0.820756	7.05875	2.83783	0.00747453	0.10432	-2.60182
RAP1GDS1	-0.19054	3.86983	-2.83701	0.00749006	0.104348	-2.60287
ELP1	-0.226116	4.17991	-2.83669	0.00749609	0.104348	-2.61788
PCID2	-0.288808	3.90898	-2.83637	0.00750219	0.104348	-2.60529
HIST1H2BK	0.54952	2.73584	2.83637	0.0075022	0.104348	-2.53092
NDFIP2	-0.512275	0.306339	-2.83625	0.00750451	0.104348	-2.42118
AC004882.3	0.563638	-0.498939	2.83566	0.00751578	0.104422	-2.45728
MAP2K6	0.261755	3.71909	2.83539	0.00752101	0.104422	-2.6011
ACTL6A	-0.189889	3.5318	-2.83385	0.00755038	0.104683	-2.59002
PGM1	0.285135	4.22918	2.83362	0.00755479	0.104683	-2.62993
SFXN5	0.286361	4.39018	2.83353	0.00755661	0.104683	-2.63573
AC011445.1	0.396148	1.24616	2.83301	0.00756664	0.104708	-2.44049
UBTD1	0.402685	3.22493	2.83268	0.00757293	0.104708	-2.57539
DEDD	0.175032	4.74333	2.83251	0.00757618	0.104708	-2.64621
IRF8	-0.338278	5.42028	-2.83182	0.0075894	0.104708	-2.64871
ZNF24	-0.289236	5.38315	-2.8318	0.00758991	0.104708	-2.64921
RFXAP	-0.337348	1.38413	-2.83169	0.00759202	0.104708	-2.44671
TTC5	-0.294914	2.62011	-2.83119	0.00760164	0.104764	-2.52842
ANKRA2	-0.326006	2.58582	-2.83052	0.00761468	0.104866	-2.52696
CCDC17	0.419338	1.92444	2.82935	0.00763732	0.104962	-2.4861
ST6GAL1	-0.326752	6.35121	-2.82932	0.00763788	0.104962	-2.64005
TFAM	-0.388032	3.82366	-2.82907	0.00764273	0.104962	-2.61566
AP001273.1	-0.416596	0.634059	-2.829	0.00764409	0.104962	-2.43285
PGM3	-0.379157	2.1738	-2.82813	0.0076609	0.105033	-2.50138
AP006623.1	0.576639	-1.0832	2.82771	0.00766916	0.105033	-2.53018
IGHV3-43	-1.08607	-1.67369	-2.82762	0.00767085	0.105033	-2.63749
ZNF354C	-0.519877	0.830258	-2.82757	0.00767175	0.105033	-2.4374
EPM2AIP1	-0.257126	4.08287	-2.82571	0.00770816	0.105445	-2.63804
ZNF257	-0.578007	-0.602975	-2.82545	0.00771314	0.105445	-2.49229
GTF2F2	-0.298893	2.03745	-2.82484	0.00772523	0.105462	-2.49999
BCL2	-0.382498	4.73649	-2.82481	0.0077257	0.105462	-2.65982
KLHDC2	-0.209361	3.9814	-2.82411	0.00773948	0.105568	-2.63739
ZNF229	-0.679602	-1.43731	-2.82384	0.00774474	0.105568	-2.59806
SASS6	-0.506942	0.872559	-2.82279	0.00776541	0.105773	-2.44785
PXN	0.278366	8.55724	2.82202	0.00778054	0.105901	-2.59317
AIDA	-0.327888	4.8513	-2.8213	0.00779485	0.106019	-2.6702
TRIM32	-0.297071	2.00297	-2.82011	0.00781837	0.106209	-2.50766
ZNF43	-0.342098	2.32332	-2.82002	0.00782015	0.106209	-2.52995
GTF2I	-0.209328	5.93554	-2.8187	0.0078463	0.106486	-2.67279
CPOX	-0.38461	3.15891	-2.81668	0.00788666	0.106746	-2.60009
STX17	-0.277623	3.7573	-2.81635	0.00789317	0.106746	-2.6418
ALOX5AP	0.545767	7.42722	2.8158	0.00790423	0.106746	-2.64059
CEP126	-0.372588	1.19268	-2.81553	0.00790961	0.106746	-2.47274
RALGAPB	-0.219858	5.03627	-2.81549	0.00791039	0.106746	-2.68595
PRKD2	0.26809	6.7166	2.81543	0.00791164	0.106746	-2.66227
PSMB9	0.30192	6.95988	2.81537	0.00791291	0.106746	-2.65554
S1PR1	-0.373391	5.75633	-2.81536	0.007913	0.106746	-2.68246
MALAT1	-0.373112	10.0463	-2.81512	0.0079179	0.106746	-2.56618
G6PD	0.371204	6.76236	2.81468	0.00792665	0.106746	-2.66264
AC096719.1	0.709448	-1.902	2.81402	0.00793999	0.106746	-2.67388
PDXDC1	-0.230897	4.79272	-2.81366	0.00794713	0.106746	-2.68723
FASTKD1	-0.417044	2.23988	-2.81353	0.00794977	0.106746	-2.53742
DNM1P47	-0.505409	0.409766	-2.81334	0.00795372	0.106746	-2.46497
PURA	-0.227229	3.81848	-2.81329	0.00795458	0.106746	-2.65268
HLA-E	0.273174	11.4084	2.81318	0.00795685	0.106746	-2.53391
CBLB	-0.314993	4.1853	-2.81241	0.00797244	0.106879	-2.67181
ABCE1	-0.413913	3.65657	-2.81163	0.00798817	0.107013	-2.64454
TMEM120A	0.358172	4.8962	2.81049	0.00801121	0.107208	-2.69833
OSGEPL1	-0.298209	1.61716	-2.81006	0.00801987	0.107208	-2.50472
SETD7	-0.295138	3.36957	-2.80987	0.00802387	0.107208	-2.6315
BZW1	-0.225927	6.0865	-2.80968	0.00802767	0.107208	-2.69017
SNX2	-0.271571	5.1342	-2.8095	0.00803139	0.107208	-2.69962
GDE1	0.286555	5.66035	2.80846	0.00805259	0.107414	-2.70107
ITGA7	0.549478	-0.396935	2.80798	0.00806234	0.107467	-2.50191
MIR210HG	0.437867	-0.29637	2.80763	0.00806933	0.107484	-2.49654
RNF2	-0.295069	3.01721	-2.80722	0.00807775	0.107519	-2.61146
RAP1B	-0.276287	6.61595	-2.80673	0.00808771	0.107575	-2.68421
MIR122HG	0.445669	0.824206	2.80632	0.00809622	0.107612	-2.48245
MIR155HG	-0.910083	-1.59893	-2.80602	0.0081023	0.107616	-2.65537
FCER1A	-0.636997	2.73427	-2.805	0.00812334	0.107754	-2.58977
SRP9	-0.399525	4.79356	-2.80495	0.00812423	0.107754	-2.70527
CNOT7	-0.202172	5.18695	-2.80464	0.00813065	0.107759	-2.7111
AAGAB	-0.16894	3.88267	-2.80389	0.00814616	0.107759	-2.67788
FBXO45	-0.301418	2.19998	-2.80389	0.00814619	0.107759	-2.5562
TRIOBP	0.265042	6.10632	2.80381	0.00814766	0.107759	-2.70357
HSPA13	-0.501169	2.94006	-2.80318	0.00816077	0.107856	-2.6114
LINC02397	-0.594735	1.19456	-2.80272	0.00817022	0.107884	-2.49824
NCF1	0.429111	9.02012	2.80252	0.00817442	0.107884	-2.62268
AP1M2	1.06266	-0.200282	2.8012	0.00820157	0.108166	-2.5038
PYCARD	0.341781	5.90385	2.80079	0.00821013	0.108202	-2.71443
PLEKHD1	0.571854	-0.354402	2.80035	0.0082193	0.108217	-2.51357
GTF2IP13	0.419197	4.10274	2.79996	0.0082275	0.108217	-2.70054
TAPT1-AS1	-0.460528	0.787409	-2.7999	0.00822865	0.108217	-2.49333
AC099489.1	0.532772	5.73204	2.79918	0.00824365	0.108333	-2.72089
RAB22A	-0.175105	4.35003	-2.79892	0.00824901	0.108333	-2.70957
LARP1B	-0.328788	1.58053	-2.79814	0.00826525	0.10847	-2.52781
TRMT10C	-0.376234	2.16887	-2.79582	0.00831385	0.108834	-2.571
GCFC2	-0.367391	2.21971	-2.79564	0.00831768	0.108834	-2.57486
MTF2	-0.270906	3.66433	-2.79554	0.00831979	0.108834	-2.68266
ZNF326	-0.279296	2.87216	-2.795	0.00833113	0.108834	-2.62769
UBA7	0.171179	6.2582	2.7949	0.00833326	0.108834	-2.72005
AC084824.1	-0.745168	-1.22655	-2.79475	0.00833644	0.108834	-2.61824
ARHGEF1	0.168078	8.55637	2.79468	0.00833776	0.108834	-2.65378
RPL28	0.269701	8.78652	2.79453	0.00834108	0.108834	-2.64725
PPP3CC	-0.30957	3.6397	-2.79432	0.00834543	0.108834	-2.68341
ZNF614	-0.322788	1.85713	-2.79377	0.00835702	0.10889	-2.55386
SLC16A11	-0.659179	-1.04278	-2.79343	0.00836417	0.10889	-2.5962
CCDC47	-0.192676	4.52774	-2.79329	0.00836721	0.10889	-2.72745
CDC37L1	-0.346106	2.23881	-2.79293	0.00837468	0.108894	-2.58261
MBNL1	-0.445005	6.96996	-2.79272	0.00837918	0.108894	-2.70558
AC010186.2	-0.3566	2.53714	-2.79238	0.00838645	0.108913	-2.60644
ZNF644	-0.526832	3.39902	-2.79181	0.00839852	0.108994	-2.67002
ATG4A	-0.243023	2.23305	-2.7914	0.00840722	0.109002	-2.58653
UBE2Q2	-0.341027	3.69011	-2.79123	0.00841079	0.109002	-2.69306
HDHD2	-0.282049	3.19955	-2.79056	0.00842503	0.109111	-2.66222
ZNF185	0.457313	5.0484	2.79017	0.00843337	0.109143	-2.74518
ATF1	-0.306752	3.11282	-2.78965	0.00844434	0.10921	-2.65739
DCUN1D4	-0.462105	2.44604	-2.78788	0.00848219	0.109563	-2.60767
IFITM2	0.555165	10.202	2.78756	0.00848888	0.109563	-2.62164
ILK	0.235711	6.19806	2.78736	0.00849318	0.109563	-2.7383
EPB41L2	-0.444051	2.38497	-2.78727	0.00849508	0.109563	-2.60432
CLDND1	-0.368169	4.17031	-2.78607	0.00852087	0.109728	-2.72932
TRIM59	-0.308529	2.16547	-2.78582	0.00852621	0.109728	-2.59277
PNISR	-0.219939	6.59882	-2.78572	0.0085285	0.109728	-2.73164
TTC19	-0.208257	3.43177	-2.78556	0.00853178	0.109728	-2.69046
ZNF304	-0.33785	2.33148	-2.78506	0.00854251	0.109728	-2.60647
DPH5	-0.376298	1.8579	-2.78492	0.00854553	0.109728	-2.57261
GAS2	-0.646166	-1.16109	-2.78468	0.00855089	0.109728	-2.62727
PPP1R16B	-0.333097	5.09212	-2.78449	0.0085549	0.109728	-2.75506
AC015818.8	0.437567	0.0644316	2.7839	0.00856766	0.109796	-2.52751
AC011498.4	0.479424	1.06737	2.7835	0.00857632	0.109796	-2.53667
TMEM106B	-0.375053	3.92277	-2.78343	0.00857778	0.109796	-2.7231
PPP4R3A	-0.21305	5.67157	-2.78308	0.00858529	0.109817	-2.75653
CORO7	0.230282	6.84035	2.78241	0.00859982	0.109927	-2.7325
ELK4	-0.356256	4.64758	-2.7789	0.00867617	0.110717	-2.76108
IFI30	0.334991	8.47613	2.77881	0.00867821	0.110717	-2.69104
CCNG1	-0.283898	4.42233	-2.77875	0.00867935	0.110717	-2.75593
NNT	-0.236524	4.15052	-2.7777	0.00870242	0.110822	-2.74855
NOL10	-0.203774	2.69169	-2.77764	0.00870381	0.110822	-2.65235
TIGD2	-0.361907	0.539528	-2.77756	0.00870543	0.110822	-2.53588
ZMYM5	-0.269154	2.62349	-2.77679	0.00872228	0.110866	-2.64806
GTPBP4	-0.178332	3.87467	-2.77646	0.00872973	0.110866	-2.73842
TRIM21	0.266541	6.0148	2.77587	0.00874263	0.110866	-2.76793
TP53I11	0.451	5.9135	2.77579	0.00874438	0.110866	-2.77011
GOLGA5P1	0.534933	-0.603922	2.77575	0.00874527	0.110866	-2.57618
VPS13A	-0.447912	3.48408	-2.77551	0.00875058	0.110866	-2.71317
WEE1	-0.363456	1.69938	-2.77538	0.00875344	0.110866	-2.58262
KRR1	-0.316263	3.14412	-2.77519	0.00875761	0.110866	-2.69132
MYBL1	-0.644985	3.48063	-2.77498	0.00876227	0.110866	-2.71154
ZBTB6	-0.358483	3.00796	-2.77344	0.00879618	0.11122	-2.6841
FBXO3	-0.302964	4.03156	-2.77283	0.0088096	0.111314	-2.75299
MPIG6B	0.899202	3.53962	2.77191	0.00883017	0.111434	-2.73139
RBM5-AS1	-0.423059	2.00597	-2.77186	0.00883129	0.111434	-2.60995
RASGRP4	0.334156	7.08357	2.7716	0.00883696	0.111434	-2.74933
GNPTAB	-0.292826	4.63569	-2.77095	0.00885142	0.111541	-2.77912
SECISBP2L	-0.389048	3.85486	-2.77012	0.00886982	0.111698	-2.74881
RRM1	-0.293296	3.08491	-2.76919	0.00889072	0.111754	-2.70011
RNASE1	0.87412	-1.74701	2.76893	0.00889651	0.111754	-2.7211
HACL1	-0.221231	2.7154	-2.76878	0.00889986	0.111754	-2.6732
PSMD10	-0.32609	2.82006	-2.76837	0.00890912	0.111754	-2.68117
LINC00494	-0.757143	0.816848	-2.76829	0.00891087	0.111754	-2.5571
USO1	-0.295946	4.50585	-2.76801	0.0089171	0.111754	-2.78225
FDX1	-0.281776	2.32618	-2.76786	0.00892041	0.111754	-2.64376
ABHD10	-0.342271	3.02372	-2.76778	0.00892216	0.111754	-2.69793
NKIRAS2	0.20845	4.48371	2.76721	0.00893494	0.111812	-2.78672
VRK1	-0.323932	1.61087	-2.7668	0.00894413	0.111812	-2.59588
MKKS	-0.281359	2.91727	-2.76677	0.00894491	0.111812	-2.69282
SHPRH	-0.355692	2.55887	-2.76628	0.00895593	0.111812	-2.6646
LNPEP	-0.259888	5.41217	-2.76625	0.00895671	0.111812	-2.79615
INTS2	-0.31434	2.30081	-2.76522	0.00897982	0.11193	-2.64705
OMA1	-0.24397	3.03077	-2.76495	0.00898598	0.11193	-2.70608
TSGA10	-0.551423	0.0643991	-2.76482	0.00898891	0.11193	-2.56652
BRMS1L	-0.485732	-0.0234172	-2.76432	0.00900018	0.11193	-2.56996
STYX	-0.321164	3.67438	-2.76406	0.00900597	0.11193	-2.75248
BBS2	-0.280695	3.86187	-2.76398	0.00900784	0.11193	-2.76433
TREML1	0.927643	3.74792	2.76393	0.00900892	0.11193	-2.76169
MSI2	-0.238623	4.35216	-2.7637	0.00901407	0.11193	-2.7876
AFAP1L2	-0.352053	0.638245	-2.76312	0.00902726	0.11202	-2.5656
UBALD1	0.31316	4.1911	2.76263	0.00903841	0.11202	-2.78719
HSF5	-0.598565	-1.06607	-2.76259	0.00903925	0.11202	-2.65219
DNAJC25	-0.430794	0.860954	-2.7605	0.00908673	0.112452	-2.57486
CXCL16	0.396845	5.17723	2.76043	0.00908837	0.112452	-2.81174
MIR4435-2HG	0.229221	3.86409	2.76015	0.0090948	0.112452	-2.77671
C11orf58	-0.270576	5.39537	-2.76	0.00909825	0.112452	-2.81005
AC099524.1	0.520988	1.84734	2.75956	0.00910831	0.112453	-2.63011
SRSF2	-0.244195	5.87773	-2.75905	0.00912	0.112453	-2.80693
PHLDB2	-0.431239	0.974312	-2.75873	0.00912725	0.112453	-2.58181
MGAT4A	-0.324076	5.24877	-2.75849	0.00913269	0.112453	-2.81338
LDAH	-0.310958	2.02191	-2.75848	0.00913301	0.112453	-2.64105
DIPK2A	-0.43341	3.19962	-2.75826	0.00913808	0.112453	-2.73076
CCDC117	-0.271387	3.79351	-2.75816	0.00914041	0.112453	-2.77317
ZNF124	-0.310834	1.18056	-2.75784	0.00914763	0.112453	-2.59173
TTC21B	-0.310518	2.68949	-2.75735	0.00915903	0.112453	-2.69492
UBL3	-0.34905	4.85228	-2.7573	0.00915997	0.112453	-2.81298
TRMT11	-0.481469	0.665505	-2.75707	0.00916542	0.112453	-2.57776
TRUB1	-0.440446	1.70543	-2.75628	0.00918343	0.112453	-2.62243
AC012360.3	-0.472152	-0.237455	-2.75598	0.00919053	0.112453	-2.59481
EML1	0.459282	-0.229366	2.7554	0.0092039	0.112453	-2.59199
AL445423.3	0.518706	2.47704	2.75529	0.00920629	0.112453	-2.68766
ZC3H12D	-0.257475	3.99578	-2.75505	0.00921199	0.112453	-2.79131
FCER2	-0.58971	3.55479	-2.75498	0.00921348	0.112453	-2.76109
AL138694.1	0.701714	-0.336259	2.75487	0.00921594	0.112453	-2.59778
GCM1	0.457581	0.184588	2.75474	0.00921905	0.112453	-2.58191
TMEM267	-0.484906	1.33029	-2.75451	0.00922433	0.112453	-2.6044
ZNF25	-0.418712	2.09628	-2.7545	0.00922469	0.112453	-2.65317
LRRC8C	-0.319367	4.30451	-2.75414	0.00923285	0.11248	-2.80597
ANKRD27	-0.172925	4.21249	-2.75277	0.00926475	0.112744	-2.80693
GDPD3	0.352275	2.77443	2.75252	0.00927045	0.112744	-2.71711
SIRT1	-0.357454	3.76998	-2.75235	0.00927437	0.112744	-2.78337
TRA2B	-0.253554	5.19556	-2.75172	0.0092891	0.112744	-2.82883
ATL3	-0.18782	4.54621	-2.75154	0.00929334	0.112744	-2.82092
LINC01320	0.675212	2.2246	2.75132	0.00929843	0.112744	-2.67616
ETS1	-0.386828	7.68858	-2.75126	0.0092998	0.112744	-2.77592
LINC02610	-0.741978	-0.408266	-2.75093	0.0093074	0.112744	-2.61559
OTUD6B-AS1	-0.526186	1.55166	-2.75071	0.00931256	0.112744	-2.62452
RBAK	-0.429451	2.61186	-2.75061	0.00931488	0.112744	-2.70172
NGLY1	-0.160464	4.4337	-2.7503	0.0093223	0.112761	-2.82057
AL121594.1	-0.63249	1.02857	-2.75	0.00932931	0.112772	-2.6001
FBRS	0.234996	6.71971	2.74948	0.00934134	0.112786	-2.80887
CTRL	0.490955	1.98495	2.74931	0.00934524	0.112786	-2.66179
AL136295.2	0.421428	0.176257	2.74908	0.00935074	0.112786	-2.59303
ZDHHC3	0.196126	5.42539	2.74891	0.00935461	0.112786	-2.8362
CD200R1	-0.523787	1.99578	-2.747	0.00939954	0.113255	-2.66086
AC007448.5	0.670892	-0.838121	2.74671	0.00940645	0.113265	-2.64765
PFKFB4	0.387335	5.96779	2.74541	0.00943696	0.113402	-2.83648
C1QB	0.832752	-0.0246585	2.74531	0.00943941	0.113402	-2.60402
CDCP1	0.592825	-0.454444	2.74512	0.00944386	0.113402	-2.62241
COMMD3	-0.39853	2.74739	-2.74503	0.00944599	0.113402	-2.72518
SSH3	0.290538	4.33185	2.74459	0.00945653	0.113402	-2.8323
AC098828.2	0.800712	-1.16459	2.74458	0.00945664	0.113402	-2.68405
AC092953.2	-0.492395	-0.490201	-2.74443	0.00946025	0.113402	-2.63087
DAPK3	0.221977	4.49688	2.74395	0.00947151	0.113448	-2.83869
GALNS	0.214869	4.66239	2.74375	0.00947627	0.113448	-2.84314
MPRIP	-0.263309	6.05072	-2.74257	0.00950434	0.113694	-2.84019
NAF1	-0.320239	1.32706	-2.74237	0.00950901	0.113694	-2.63044
GPANK1	0.203721	3.60638	2.74154	0.00952879	0.113858	-2.80221
JAZF1-AS1	0.637926	-1.00925	2.74113	0.00953851	0.113901	-2.67361
MAGT1	-0.179508	4.8815	-2.73976	0.00957143	0.114222	-2.85357
PGRMC2	-0.192219	3.65548	-2.73922	0.00958439	0.114303	-2.80735
ALDH6A1	-0.204749	2.41075	-2.73882	0.00959397	0.114306	-2.71366
WDHD1	-0.44487	0.288257	-2.7384	0.00960404	0.114306	-2.61334
CREB1	-0.265091	5.52242	-2.73825	0.00960754	0.114306	-2.85744
POGK	-0.205512	4.53106	-2.73808	0.00961154	0.114306	-2.85008
PHC2	0.474699	7.85137	2.73793	0.00961522	0.114306	-2.79978
AC011416.3	-0.628768	-1.33681	-2.73723	0.00963205	0.114433	-2.72642
CD226	-0.327177	4.22607	-2.73671	0.00964464	0.114439	-2.84156
ANKRD13D	0.236818	7.00489	2.73617	0.00965752	0.114439	-2.82989
IRF7	0.415732	5.59562	2.73599	0.00966209	0.114439	-2.86337
GBP1P1	0.606641	-0.407254	2.73561	0.00967123	0.114439	-2.63725
TC2N	-0.441901	4.69583	-2.73542	0.00967584	0.114439	-2.85771
HMGN3	-0.277567	2.71587	-2.73535	0.00967746	0.114439	-2.74527
FAM136A	-0.284847	2.96318	-2.7353	0.00967871	0.114439	-2.76486
TBC1D3B	0.470899	1.12939	2.73518	0.00968153	0.114439	-2.63864
CAMK2D	-0.431174	3.53891	-2.73483	0.00968992	0.114461	-2.8063
SRSF7	-0.324958	5.43004	-2.7346	0.00969564	0.114461	-2.86581
SMC2	-0.400528	2.16488	-2.73423	0.00970466	0.114484	-2.70235
TASOR	-0.305303	4.96284	-2.73401	0.00970981	0.114484	-2.86626
DAND5	0.569526	-0.24671	2.73365	0.00971856	0.114504	-2.63343
VIRMA	-0.168733	4.65764	-2.73344	0.00972373	0.114504	-2.86375
BORA	-0.476159	1.28075	-2.73281	0.00973901	0.114611	-2.64672
MRE11	-0.190794	3.89471	-2.73245	0.00974771	0.114641	-2.83635
AC015813.5	-0.663621	-1.7283	-2.73201	0.00975849	0.114696	-2.79171
FGF7	-0.687966	-1.18687	-2.7313	0.00977592	0.114763	-2.71938
KCTD7	-0.22999	4.39763	-2.73127	0.00977646	0.114763	-2.86082
LNX2	-0.291722	2.02499	-2.73094	0.00978453	0.114785	-2.69947
MYPOP	0.221982	2.50621	2.73068	0.00979106	0.11479	-2.74218
TAF1	-0.277993	4.66136	-2.73036	0.00979873	0.114792	-2.86969
AC126474.2	0.290883	2.40061	2.72961	0.00981722	0.114792	-2.73597
ODF3B	0.394697	4.80513	2.72937	0.0098231	0.114792	-2.87784
ST3GAL2	0.250078	6.41247	2.72927	0.00982558	0.114792	-2.86178
AP001056.1	-0.622508	-1.47219	-2.72916	0.00982809	0.114792	-2.75695
LRRC37BP1	-0.229964	2.86513	-2.72889	0.00983469	0.114792	-2.77157
ASXL2	-0.335376	4.47697	-2.72873	0.00983866	0.114792	-2.86782
AP005061.1	0.450646	-0.657553	2.72809	0.00985433	0.114792	-2.66693
SENP7	-0.400134	4.06186	-2.72807	0.00985489	0.114792	-2.85191
AC018695.9	-0.628645	-0.559897	-2.72806	0.00985526	0.114792	-2.66644
SUPT3H	-0.402478	0.663292	-2.7277	0.00986398	0.114792	-2.63648
PRELID3B	-0.236183	4.00423	-2.72752	0.00986852	0.114792	-2.85238
AP4E1	-0.266485	2.73336	-2.72741	0.00987111	0.114792	-2.76355
NATD1	0.385672	6.26097	2.72652	0.00989306	0.114976	-2.8716
HEATR5B	-0.312988	4.33897	-2.72561	0.00991567	0.115142	-2.87028
TAPT1	-0.310624	3.52589	-2.7254	0.00992084	0.115142	-2.8277
KLRC4-KLRK1	-0.577004	1.85878	-2.72499	0.00993105	0.115142	-2.69721
ARMCX5	-0.353597	1.74008	-2.72468	0.00993858	0.115142	-2.69169
PHKG2	0.215191	4.70852	2.72453	0.00994234	0.115142	-2.88651
AC097376.3	0.308267	3.12315	2.72445	0.0099443	0.115142	-2.80561
PTPN22	-0.281602	4.15563	-2.72282	0.00998487	0.115534	-2.86961
KIF1BP	-0.22624	2.38168	-2.72259	0.00999057	0.115534	-2.74599
EIF2S1	-0.227785	3.81688	-2.72194	0.0100066	0.115649	-2.85459
ALDH3A2	-0.185774	4.13482	-2.7217	0.0100128	0.115649	-2.87197
NUDT21	-0.351729	4.47431	-2.72125	0.010024	0.115694	-2.88408
TTC33	-0.395438	2.58429	-2.72099	0.0100304	0.115694	-2.76336
TPP2	-0.325646	4.62709	-2.72058	0.0100406	0.115694	-2.88998
RAD9A	0.191653	3.55919	2.72055	0.0100415	0.115694	-2.84503
EPC2	-0.286684	4.0002	-2.72015	0.0100516	0.11571	-2.8677
HACE1	-0.281033	1.69636	-2.71957	0.0100659	0.11571	-2.70044
ZNF439	-0.335117	2.42305	-2.7195	0.0100678	0.11571	-2.75464
PPIAP53	0.371774	1.54503	2.71949	0.0100679	0.11571	-2.69363
FURIN	0.321358	7.23918	2.71926	0.0100739	0.11571	-2.85983
UBR7	-0.190498	3.67301	-2.7188	0.0100853	0.115715	-2.85321
RIOK2	-0.298728	2.40991	-2.71851	0.0100926	0.115715	-2.75645
UTP20	-0.294202	2.43983	-2.71819	0.0101006	0.115715	-2.75951
LINC00662	-0.23991	3.55618	-2.71809	0.0101033	0.115715	-2.84701
SNHG26	-0.356556	0.364862	-2.71801	0.0101052	0.115715	-2.65271
PRRT2	0.356009	0.267124	2.71771	0.0101128	0.115731	-2.65331
IMPDH1	0.338763	7.50802	2.71727	0.0101238	0.115786	-2.85579
UBR3	-0.277258	3.78119	-2.71594	0.0101574	0.116085	-2.86505
IRF1	0.271034	8.58157	2.71574	0.0101624	0.116085	-2.82559
ZMYM6	-0.283662	3.65187	-2.71536	0.0101722	0.116126	-2.85832
SEC24A	-0.3358	3.06383	-2.71465	0.01019	0.116162	-2.8165
OTX1	0.549554	1.11954	2.71433	0.0101983	0.116162	-2.68077
AC016026.1	-0.404131	2.05194	-2.71429	0.0101992	0.116162	-2.73582
TMEM115	0.189591	4.17853	2.71421	0.0102012	0.116162	-2.89294
DCAF13	-0.340603	2.5581	-2.71401	0.0102065	0.116162	-2.77765
BMS1P1	-0.452659	1.93381	-2.71305	0.0102308	0.116369	-2.72922
FAM214B	0.310417	5.8345	2.71096	0.0102841	0.116739	-2.9149
CCT2	-0.343502	4.01278	-2.71051	0.0102955	0.116739	-2.88902
TLE1	-0.378207	1.90689	-2.7103	0.010301	0.116739	-2.73332
SLC16A7	-0.305414	3.13687	-2.71018	0.0103039	0.116739	-2.83285
C5orf15	-0.262543	3.90643	-2.71012	0.0103057	0.116739	-2.8851
SELPLG	0.341585	8.533	2.71006	0.0103072	0.116739	-2.83934
S1PR4	0.302222	7.45536	2.70988	0.0103117	0.116739	-2.87358
CREBZF	-0.490713	4.28463	-2.70982	0.0103134	0.116739	-2.90073
TMEM127	0.260544	6.95074	2.70937	0.0103248	0.116774	-2.89022
E2F6	-0.244964	1.7442	-2.70903	0.0103335	0.116774	-2.72551
XPO4	-0.320176	3.28446	-2.70897	0.0103352	0.116774	-2.84626
CNN1	0.605875	-1.58352	2.70872	0.0103416	0.116776	-2.79492
GMCL1	-0.273978	4.32194	-2.70808	0.010358	0.11689	-2.90851
PIK3R4	-0.249985	3.61187	-2.70764	0.0103694	0.116936	-2.87294
TANGO2	0.304931	5.939	2.70721	0.0103805	0.116936	-2.92119
PANX2	0.437601	4.67817	2.70701	0.0103857	0.116936	-2.92486
LINC01004	-0.41477	0.0437056	-2.70695	0.010387	0.116936	-2.67695
ODF2L	-0.288763	3.28923	-2.70643	0.0104005	0.116983	-2.85281
EFCAB12	0.439369	1.47094	2.70631	0.0104038	0.116983	-2.7165
TMEM181	-0.354293	4.13567	-2.70527	0.0104305	0.117086	-2.90624
YWHAQ	-0.212297	5.82714	-2.70525	0.0104312	0.117086	-2.92653
NFATC2	-0.380455	4.50879	-2.70491	0.01044	0.117086	-2.92079
TRIM52	-0.303324	4.40601	-2.70462	0.0104473	0.117086	-2.91887
ZNF585A	-0.252327	2.15112	-2.70457	0.0104489	0.117086	-2.76518
DHX9	-0.184577	6.01948	-2.7045	0.0104505	0.117086	-2.92479
C11orf80	-0.290119	1.84019	-2.70404	0.0104626	0.117151	-2.74263
NDST1	0.428052	5.80603	2.70302	0.0104892	0.117215	-2.93283
LINC00173	0.400553	3.38259	2.70299	0.0104898	0.117215	-2.87182
CHMP6	0.192716	3.8865	2.70284	0.0104938	0.117215	-2.90365
MYO1E	-0.535469	2.00136	-2.70281	0.0104946	0.117215	-2.75426
KLRC2	-1.39417	-1.08855	-2.70261	0.0104996	0.117215	-2.76763
ZCCHC4	-0.2963	1.45443	-2.70227	0.0105086	0.117245	-2.72047
RBM12	-0.198397	5.12327	-2.70162	0.0105256	0.117364	-2.93942
RPL21P16	-1.75927	3.05773	-2.70123	0.0105359	0.117408	-2.81604
PDLIM3	0.396429	-0.661423	2.70026	0.0105611	0.11762	-2.71721
COTL1	0.264026	9.50476	2.69953	0.0105805	0.117741	-2.83242
TMEM128	-0.343647	2.1452	-2.69932	0.0105858	0.117741	-2.77508
CACYBP	-0.213985	4.15901	-2.69909	0.0105918	0.117741	-2.92217
TMEM11	0.266585	3.20968	2.69889	0.0105972	0.117741	-2.86746
AC018638.5	0.36995	3.99789	2.69787	0.0106239	0.11796	-2.92092
CLINT1	-0.292946	5.24486	-2.69766	0.0106296	0.11796	-2.94774
GNL2	-0.226391	3.48928	-2.69683	0.0106514	0.118132	-2.88849
PIKFYVE	-0.329846	4.62719	-2.69605	0.0106721	0.118148	-2.94368
SETD4	-0.179233	2.90293	-2.69597	0.0106742	0.118148	-2.84611
MKNK1	0.294909	6.07134	2.69575	0.0106802	0.118148	-2.94351
GATM	-0.627205	0.451059	-2.69561	0.0106837	0.118148	-2.69645
IKBKG	0.196694	5.40945	2.69459	0.0107108	0.118148	-2.95594
PLXNA2	0.474519	2.02877	2.69401	0.0107264	0.118148	-2.78219
KLHL15	-0.299494	2.03515	-2.69382	0.0107313	0.118148	-2.7782
PMPCB	-0.15564	4.48746	-2.69379	0.0107322	0.118148	-2.94654
TMEM88	0.553027	1.31002	2.69339	0.0107427	0.118148	-2.73352
NFKBIL1	0.220222	2.75662	2.6931	0.0107505	0.118148	-2.84332
IER5	-0.298789	4.97352	-2.69304	0.010752	0.118148	-2.95646
C9orf16	0.340829	4.4	2.69261	0.0107637	0.118148	-2.94896
FRYL	-0.259841	4.68793	-2.69247	0.0107673	0.118148	-2.95359
B3GNT8	0.43173	4.7421	2.69239	0.0107695	0.118148	-2.95805
DBNL	0.210274	7.82147	2.69229	0.0107722	0.118148	-2.90031
HNRNPA3	-0.171426	6.96616	-2.69228	0.0107724	0.118148	-2.927
ANKRD42	-0.214216	1.97539	-2.69212	0.0107767	0.118148	-2.77809
MPST	0.279694	4.07545	2.69205	0.0107786	0.118148	-2.93714
TRAF4	-0.376656	2.42818	-2.69104	0.0108055	0.118148	-2.81513
LINC01355	-0.337537	1.53369	-2.69104	0.0108055	0.118148	-2.74819
GTPBP8	-0.272603	1.67945	-2.69104	0.0108056	0.118148	-2.75845
TYROBP	0.36838	8.27412	2.69088	0.0108099	0.118148	-2.88888
EPRS	-0.23097	5.08503	-2.69086	0.0108103	0.118148	-2.96256
NAP1L1	-0.238896	6.99537	-2.69082	0.0108114	0.118148	-2.92926
FBXO21	-0.245276	3.4088	-2.69076	0.0108129	0.118148	-2.89562
FAM13B	-0.280584	4.53603	-2.69061	0.0108171	0.118148	-2.95368
PSMC6	-0.416863	3.40784	-2.69027	0.0108261	0.118177	-2.89454
NAALAD2	-0.532656	-1.40106	-2.68958	0.0108448	0.118312	-2.81201
DGKZ	0.195804	7.43658	2.68877	0.0108665	0.118458	-2.92013
CLU	0.870393	5.62148	2.68861	0.0108709	0.118458	-2.96659
IGHV3-49	-1.18231	-0.839615	-2.68681	0.0109193	0.118916	-2.76798
GOPC	-0.433161	3.6796	-2.68646	0.0109289	0.118951	-2.92068
ZBTB14	-0.319474	3.26649	-2.68591	0.0109437	0.119043	-2.89485
MNT	0.192226	5.09585	2.68495	0.0109697	0.119256	-2.97752
WDR36	-0.372493	3.2555	-2.68471	0.0109763	0.119259	-2.89544
ZC3H14	-0.164881	3.89558	-2.6844	0.0109847	0.119281	-2.94165
RNF135	0.197484	4.24586	2.68354	0.0110081	0.119415	-2.96267
ZNF550	-0.341605	2.37213	-2.68348	0.0110098	0.119415	-2.82685
EFL1	-0.244152	2.95869	-2.68122	0.0110715	0.120014	-2.88156
AP003393.1	0.76431	-1.5402	2.68063	0.0110878	0.120067	-2.83485
NAA30	-0.302215	2.90886	-2.68057	0.0110892	0.120067	-2.87801
DOP1A	-0.314674	3.33395	-2.67993	0.011107	0.12019	-2.9127
USP33	-0.205682	4.71175	-2.67964	0.0111149	0.120205	-2.98255
SLC25A29	-0.449693	4.54586	-2.67895	0.0111339	0.120226	-2.97776
SNHG8	-0.5267	1.34577	-2.67888	0.0111358	0.120226	-2.75984
PSENEN	0.330728	4.8355	2.67861	0.0111434	0.120226	-2.98947
MRPL42	-0.220284	3.75836	-2.67845	0.0111477	0.120226	-2.9459
ARL5A	-0.43788	3.38523	-2.6784	0.011149	0.120226	-2.91801
ZNF292	-0.407123	4.44409	-2.6779	0.0111628	0.120305	-2.97711
SLC20A2	-0.246784	2.61434	-2.67719	0.0111823	0.120356	-2.86141
AC055839.1	0.491008	-0.837103	2.67705	0.0111864	0.120356	-2.77085
MPHOSPH10	-0.256078	3.45318	-2.67691	0.0111902	0.120356	-2.92868
IFI35	0.439511	4.65436	2.67678	0.0111939	0.120356	-2.99045
FERMT3	0.247511	7.34278	2.67614	0.0112115	0.120356	-2.95041
CPT1C	0.517837	-0.621914	2.6757	0.0112237	0.120356	-2.75837
ZBED4	-0.26299	3.40507	-2.67565	0.0112251	0.120356	-2.92775
WDR61	-0.231002	3.17234	-2.67552	0.0112285	0.120356	-2.91091
DNAJA3	-0.180617	4.0588	-2.67507	0.0112412	0.120356	-2.97016
PLEKHA2	-0.219602	5.97269	-2.6749	0.011246	0.120356	-2.99022
ZNF250	-0.219748	1.80639	-2.67469	0.0112518	0.120356	-2.80178
MTR	-0.355018	3.85047	-2.67467	0.0112524	0.120356	-2.95803
CMPK1	-0.325634	5.20034	-2.6746	0.0112543	0.120356	-2.99783
NARS	-0.198383	5.36531	-2.67448	0.0112576	0.120356	-2.99868
CUL5	-0.424341	3.15656	-2.67305	0.0112975	0.120713	-2.91223
HECTD1	-0.289737	4.91497	-2.67259	0.0113102	0.12078	-3.00048
SARNP	-0.568391	1.16074	-2.67217	0.011322	0.120809	-2.76418
FMNL1	0.269588	8.91627	2.67159	0.0113383	0.120809	-2.9103
PLCXD2	-0.435013	2.0697	-2.67157	0.0113389	0.120809	-2.82611
PPIL4	-0.299542	3.08048	-2.67147	0.0113416	0.120809	-2.9114
RAB37	0.209451	6.5051	2.67134	0.0113452	0.120809	-2.98586
RXRB	0.14878	5.6428	2.67076	0.0113614	0.120843	-3.00549
ARPC4	0.251625	7.78187	2.67076	0.0113614	0.120843	-2.94803
STIM2	-0.229612	4.10998	-2.66938	0.0114002	0.12096	-2.98438
UBTD2	-0.268276	1.94698	-2.66915	0.0114067	0.12096	-2.82335
KCND1	0.383529	1.21437	2.66913	0.0114074	0.12096	-2.77727
CBX3	-0.342652	4.82005	-2.6686	0.0114221	0.12096	-3.00735
SLTM	-0.141117	5.9775	-2.66858	0.0114228	0.12096	-3.00408
NBPF11	-0.326414	3.94254	-2.66851	0.0114247	0.12096	-2.97668
COQ3	-0.350521	-0.173165	-2.66805	0.0114377	0.12096	-2.75514
PGD	0.355775	7.87702	2.66801	0.011439	0.12096	-2.95084
SERPINI1	-0.642203	-0.491646	-2.668	0.0114393	0.12096	-2.76955
CAPRIN2	-0.299697	3.3968	-2.66789	0.0114424	0.12096	-2.94355
SBSPON	-0.415904	-0.322861	-2.66784	0.0114436	0.12096	-2.76093
C2CD4D-AS1	-0.72334	-1.05431	-2.66683	0.0114723	0.121091	-2.81521
TASP1	-0.311671	1.25877	-2.66624	0.0114888	0.121091	-2.78236
MZT1	-0.379064	1.30649	-2.66617	0.0114908	0.121091	-2.78477
CDC40	-0.239089	4.39302	-2.66578	0.011502	0.121091	-3.00368
AMIGO2	-0.323609	1.96764	-2.66513	0.0115205	0.121091	-2.83302
RARS	-0.219092	3.54546	-2.66496	0.0115253	0.121091	-2.96131
CD63	0.312402	7.05524	2.66475	0.0115312	0.121091	-2.98396
TBC1D27P	-0.590666	0.527895	-2.66472	0.0115321	0.121091	-2.75741
MARC1	0.45684	4.8242	2.66471	0.0115325	0.121091	-3.01971
THAP12	-0.329504	4.53553	-2.6647	0.0115327	0.121091	-3.0096
VMA21	-0.266868	3.42941	-2.66469	0.0115331	0.121091	-2.95301
GSAP	-0.286706	4.23959	-2.66466	0.0115338	0.121091	-2.99981
GNL3	-0.43854	3.14309	-2.66397	0.0115535	0.121231	-2.93083
C4orf46	-0.311261	0.96042	-2.66342	0.0115691	0.121261	-2.77348
DOCK8-AS1	0.390812	1.21897	2.66341	0.0115694	0.121261	-2.78899
ZNF286A	-0.296505	1.92381	-2.66262	0.011592	0.12143	-2.83492
SH3RF3	0.405914	2.55004	2.66195	0.011611	0.121498	-2.89283
GPRIN3	-0.340114	4.10379	-2.66194	0.0116115	0.121498	-2.99907
PIGA	-0.281459	1.92589	-2.66108	0.0116361	0.121687	-2.83837
BTBD7	-0.163055	3.60324	-2.66067	0.011648	0.121743	-2.97492
SLC16A3	0.342167	7.76559	2.66004	0.0116659	0.12184	-2.97156
DNM1L	-0.235926	4.00309	-2.65989	0.0116703	0.12184	-2.99968
DDX31	-0.294678	2.15045	-2.65942	0.0116837	0.121912	-2.85974
TCTA	0.18435	4.16117	2.65912	0.0116924	0.121935	-3.01216
PRDM11	-0.303111	2.01919	-2.65865	0.0117059	0.122007	-2.85063
FAM20A	0.675464	0.776312	2.65828	0.0117167	0.122052	-2.77898
DCLRE1A	-0.394224	1.19513	-2.65767	0.0117343	0.122118	-2.79581
MLF2	0.29792	6.30269	2.65761	0.0117361	0.122118	-3.02096
C20orf194	-0.261142	2.57123	-2.65684	0.0117584	0.122282	-2.9008
ARFGEF2	-0.447741	3.67721	-2.65657	0.0117661	0.122294	-2.98482
MAGOHB	-0.313097	1.08838	-2.65611	0.0117794	0.122364	-2.794
WDTC1	0.284302	6.83387	2.65561	0.0117939	0.122447	-3.01045
NOM1	-0.263084	3.22859	-2.65495	0.011813	0.122577	-2.95894
STK26	-0.309857	4.56029	-2.65415	0.0118365	0.122701	-3.03334
E2F1	0.424338	1.097	2.6541	0.011838	0.122701	-2.8014
TMEM68	-0.238193	1.99578	-2.65298	0.0118705	0.122902	-2.86121
CARNMT1	-0.411609	2.01616	-2.65298	0.0118706	0.122902	-2.86077
GAPDH	0.323695	9.14219	2.65249	0.0118848	0.122981	-2.94395
PEF1	0.180908	4.66739	2.65209	0.0118966	0.123	-3.04372
SCRN1	-0.344326	3.49014	-2.65195	0.0119008	0.123	-2.98355
AC091959.3	-1.40125	-1.32515	-2.65176	0.0119064	0.123	-2.87979
DNMBP	-0.343377	2.63816	-2.65135	0.0119182	0.123017	-2.91688
LCMT2	0.765718	7.74853	2.65109	0.0119258	0.123017	-2.9909
NHLRC2	-0.306821	3.34041	-2.65102	0.0119278	0.123017	-2.9753
ZNF558	-0.284377	2.68644	-2.65012	0.0119546	0.123225	-2.9245
HERC2	-0.3357	4.06865	-2.64979	0.0119641	0.123256	-3.02363
LARGE1	-0.676333	0.639687	-2.64891	0.01199	0.12342	-2.78993
TSNAX	-0.319402	4.12842	-2.64859	0.0119993	0.12342	-3.02914
SLC22A18	0.492033	3.98205	2.64858	0.0119999	0.12342	-3.02717
PNN	-0.231393	5.52625	-2.64804	0.0120156	0.123514	-3.0548
ATG5	-0.394253	2.6444	-2.64765	0.0120273	0.123565	-2.92454
PCDH9	-0.445696	2.47573	-2.64674	0.0120541	0.123617	-2.91224
CBR3	-0.628344	-0.208754	-2.64673	0.0120546	0.123617	-2.79662
RPS24	-0.441451	5.01812	-2.64665	0.0120567	0.123617	-3.05656
FUT7	0.366112	5.29221	2.64625	0.0120688	0.123617	-3.06197
MPZ	0.332754	1.81355	2.64577	0.012083	0.123617	-2.86519
TMA16	-0.294308	1.45814	-2.64569	0.0120852	0.123617	-2.836
RGMB	-0.552133	0.937339	-2.64559	0.0120882	0.123617	-2.80691
AC004263.2	0.272685	4.16582	2.64557	0.012089	0.123617	-3.04189
SEPTIN4	0.504175	0.668814	2.64547	0.0120918	0.123617	-2.80044
HMGCS1	-0.279554	3.0969	-2.6452	0.0120999	0.123632	-2.9689
GADD45B	0.238341	5.3638	2.64439	0.012124	0.12375	-3.06551
CCDC51	-0.240144	1.47371	-2.64437	0.0121247	0.12375	-2.8403
FBXW5	0.18166	6.30327	2.64396	0.0121368	0.123804	-3.05041
UBXN4	-0.272021	5.68344	-2.64311	0.0121622	0.123804	-3.06357
ZBTB25	-0.291871	4.12971	-2.64297	0.0121664	0.123804	-3.04167
KXD1	0.158543	5.31536	2.64291	0.0121681	0.123804	-3.06875
AC008105.3	0.217024	5.30583	2.64282	0.0121708	0.123804	-3.0691
DDX1	-0.252167	4.02673	-2.6427	0.0121743	0.123804	-3.03772
AP000547.3	0.575232	3.32104	2.64263	0.0121764	0.123804	-2.99754
EXOSC6	-0.232559	4.05416	-2.64088	0.012229	0.124235	-3.0434
UBA6-AS1	-0.260584	2.25799	-2.64057	0.0122384	0.124235	-2.90821
BAK1	0.273007	4.84997	2.64041	0.012243	0.124235	-3.07239
EVA1B	0.380484	2.63135	2.64009	0.0122527	0.124235	-2.94592
ARL15	-0.187068	2.56128	-2.63995	0.0122569	0.124235	-2.93605
ZRANB2	-0.482982	4.89895	-2.63989	0.0122587	0.124235	-3.06924
SLC39A10	-0.436423	3.06268	-2.63945	0.0122719	0.124302	-2.97636
FAM199X	-0.284312	4.09975	-2.63889	0.012289	0.124401	-3.04899
CSF3R	0.329433	11.2385	2.6385	0.0123008	0.124401	-2.90938
DHX33	-0.194729	2.81289	-2.63847	0.0123016	0.124401	-2.96092
IKZF5	-0.365893	3.66035	-2.63798	0.0123165	0.124421	-3.02466
MAP3K1	-0.385348	6.0663	-2.63796	0.0123169	0.124421	-3.0678
NINJ2	0.433431	3.86608	2.63771	0.0123245	0.124431	-3.04423
MAK16	-0.258361	2.58801	-2.63713	0.012342	0.124473	-2.94368
SLF1	-0.276934	2.23663	-2.63702	0.0123456	0.124473	-2.91372
MAP3K9	-0.320491	1.47996	-2.63663	0.0123571	0.124473	-2.85604
DDX11	-0.41393	3.83114	-2.6365	0.0123613	0.124473	-3.03829
AC004877.2	0.586268	-1.33857	2.63647	0.012362	0.124473	-2.88436
ZNF879	-0.347603	0.839207	-2.63609	0.0123736	0.124517	-2.82269
PRKACB	-0.4975	4.93646	-2.63589	0.0123798	0.124517	-3.07827
AL356019.2	-0.395795	-0.309434	-2.63541	0.0123944	0.124597	-2.81916
DCAF11	0.223072	6.11287	2.63478	0.0124134	0.124722	-3.07482
PGM2L1	-0.259773	2.44779	-2.63127	0.0125208	0.125732	-2.94421
SLC24A3	0.515731	0.49203	2.6293	0.0125813	0.126273	-2.82701
SC5D	-0.318411	2.52711	-2.62882	0.012596	0.126353	-2.95509
MOB1B	-0.368273	2.89128	-2.62771	0.0126306	0.126425	-2.98806
AC015674.1	0.349593	1.51944	2.6277	0.0126307	0.126425	-2.8804
WNT10A	-0.508666	0.333528	-2.62752	0.0126362	0.126425	-2.82633
ENY2	-0.21939	3.13578	-2.62733	0.0126423	0.126425	-3.0111
HOMER3	0.356454	3.56192	2.62681	0.0126583	0.126425	-3.04827
AC007620.2	0.350967	2.33433	2.62635	0.0126726	0.126425	-2.94872
BAHD1	-0.21796	4.23999	-2.62632	0.0126735	0.126425	-3.08322
LIX1-AS1	-1.0703	-1.87586	-2.62609	0.0126806	0.126425	-2.97861
RPE	-0.349498	2.6743	-2.62575	0.0126911	0.126425	-2.9739
AOAH	0.223954	6.25705	2.62571	0.0126924	0.126425	-3.09086
EEF2K	-0.203795	3.40969	-2.6257	0.0126929	0.126425	-3.03566
LRSAM1	0.158206	4.01509	2.6256	0.012696	0.126425	-3.07726
AL157938.3	0.598308	-0.715639	2.62539	0.0127023	0.126425	-2.85293
PWP1	-0.22602	3.59294	-2.62522	0.0127079	0.126425	-3.04979
RAC2	0.250847	8.82101	2.6252	0.0127084	0.126425	-3.01205
CEP68	-0.249512	3.69293	-2.6251	0.0127115	0.126425	-3.05602
AC010327.7	0.84959	-1.6628	2.624	0.0127457	0.126614	-2.94024
GAS2L1	0.521061	3.32697	2.62388	0.0127493	0.126614	-3.03792
OTUD5	0.202923	5.9905	2.62367	0.0127561	0.126614	-3.10141
AC068831.4	0.360775	3.51449	2.62362	0.0127576	0.126614	-3.05178
CCDC59	-0.252274	2.59443	-2.62285	0.0127817	0.126786	-2.9744
UGDH	-0.274763	2.1281	-2.62224	0.0128008	0.126908	-2.93528
CLIC4	-0.390849	3.46157	-2.62164	0.0128197	0.126929	-3.04543
LINC01270	0.510251	2.90499	2.62158	0.0128213	0.126929	-3.00861
PJA1	-0.25294	2.96997	-2.62137	0.0128281	0.126929	-3.00966
ATG2B	-0.240742	4.00825	-2.62081	0.0128455	0.126929	-3.08386
CDIPT	0.223645	5.93836	2.62031	0.0128613	0.126929	-3.10969
ARMC7	0.206207	3.87855	2.62025	0.0128634	0.126929	-3.08159
ATP11C	-0.431906	2.81716	-2.62009	0.0128682	0.126929	-2.99659
TPK1	-0.202683	2.70783	-2.61977	0.0128783	0.126929	-2.99115
ZNF395	-0.266108	4.48471	-2.61974	0.0128793	0.126929	-3.10578
ERMP1	-0.355506	2.86649	-2.61974	0.0128793	0.126929	-3.00291
GABPB1	-0.2362	3.01006	-2.61965	0.0128821	0.126929	-3.01641
XPO1	-0.27946	5.67129	-2.61952	0.0128862	0.126929	-3.11449
AP1AR	-0.45273	2.35995	-2.61914	0.0128981	0.126929	-2.95907
CSPP1	-0.250344	2.82695	-2.61873	0.012911	0.126929	-3.0032
TUT4	-0.219082	4.58368	-2.61872	0.0129113	0.126929	-3.11118
PRKAB2	-0.339013	3.15687	-2.61853	0.0129175	0.126929	-3.02952
RPS6KA3	-0.238876	6.05612	-2.6185	0.0129184	0.126929	-3.11032
RGS19	0.257404	6.72691	2.61769	0.0129441	0.127103	-3.09511
ARHGAP4	0.171364	7.84627	2.61751	0.0129497	0.127103	-3.05999
USP45	-0.410361	1.31381	-2.61707	0.0129636	0.127122	-2.88389
JAK3	0.256011	7.61825	2.61702	0.0129653	0.127122	-3.06843
ZNF829	-0.281747	0.97876	-2.61649	0.012982	0.127122	-2.86778
CGRRF1	-0.428132	1.30184	-2.61642	0.0129843	0.127122	-2.88459
PRR13	0.275714	7.42861	2.61638	0.0129857	0.127122	-3.07595
PNPLA1	0.567606	1.54242	2.61595	0.0129991	0.127127	-2.9064
FAM133B	-0.239091	3.35947	-2.61581	0.0130037	0.127127	-3.05263
HSPA6	0.398538	7.23324	2.61566	0.0130083	0.127127	-3.08365
SH3PXD2B	0.725998	-0.368618	2.61547	0.0130145	0.127127	-2.85516
ZMAT1	-0.51117	2.8741	-2.6152	0.0130232	0.127127	-3.01109
CLCC1	-0.226557	3.00015	-2.61473	0.013038	0.127127	-3.02647
CASK	-0.26433	2.90208	-2.61468	0.0130396	0.127127	-3.01799
CPT2	0.147165	3.37744	2.61459	0.0130424	0.127127	-3.06009
TIMELESS	-0.332253	2.60275	-2.61444	0.0130474	0.127127	-2.99169
EIF2AK3-DT	-0.411884	-0.317114	-2.61376	0.0130691	0.127234	-2.85873
HMGN2P3	1.46513	1.45088	2.61365	0.0130724	0.127234	-2.9034
MAP4K3	-0.524822	1.06148	-2.61317	0.0130879	0.127234	-2.87642
LIN7C	-0.253546	3.13117	-2.61306	0.0130912	0.127234	-3.04029
PUSL1	0.271785	1.9692	2.61303	0.0130924	0.127234	-2.94503
AP002381.2	0.370715	2.31441	2.61274	0.0131016	0.127257	-2.97527
ZNF367	-0.407243	0.636974	-2.6123	0.0131155	0.127326	-2.86193
BICD1	-0.34288	1.15876	-2.61162	0.0131375	0.127429	-2.88614
LRATD2	-0.384821	2.38396	-2.61155	0.0131397	0.127429	-2.97843
EEF1A1P13	-0.482805	0.568163	-2.61109	0.0131546	0.127482	-2.8621
NSUN5	0.167806	4.37744	2.61095	0.0131589	0.127482	-3.12414
ANKIB1	-0.379632	3.5721	-2.6101	0.0131862	0.127681	-3.07813
ZFAND1	-0.398578	2.17761	-2.6094	0.0132088	0.127834	-2.96468
TPST2	0.217634	5.61766	2.60913	0.0132176	0.127852	-3.13898
PPP6R2	0.139347	5.83368	2.60737	0.0132743	0.127924	-3.13931
SSU72	0.165895	6.11173	2.60737	0.0132743	0.127924	-3.13362
IGHV4-31	-1.28832	-0.75161	-2.60723	0.013279	0.127924	-2.89922
SLC15A2	-0.355468	2.24227	-2.60706	0.0132844	0.127924	-2.97537
KLHL20	-0.288239	2.56026	-2.60706	0.0132846	0.127924	-3.00388
AC009779.3	0.301031	2.33958	2.60701	0.013286	0.127924	-2.98925
KIF5B	-0.27927	5.26473	-2.60668	0.0132968	0.127924	-3.14482
KATNB1	0.185115	4.13493	2.60666	0.0132974	0.127924	-3.12369
NLRX1	0.331738	4.53168	2.60659	0.0132999	0.127924	-3.13879
SFMBT1	-0.254042	2.59203	-2.60658	0.0133002	0.127924	-3.00837
HIKESHI	-0.263463	2.5271	-2.60647	0.0133037	0.127924	-3.00273
SEC23A	-0.275617	4.02448	-2.60626	0.0133103	0.127924	-3.11513
CASP8AP2	-0.469896	3.29738	-2.60563	0.013331	0.127924	-3.06586
NRIP3	0.428227	0.167795	2.60543	0.0133375	0.127924	-2.86746
NCF4	0.382416	7.8286	2.60542	0.0133376	0.127924	-3.08606
ZNF10	-0.444767	1.099	-2.60538	0.0133391	0.127924	-2.89459
MAP1A	0.596594	0.839627	2.60531	0.0133414	0.127924	-2.88574
BIRC6	-0.266809	5.28785	-2.60507	0.0133492	0.127933	-3.14832
SLC66A2	0.386277	5.4638	2.60422	0.0133767	0.128132	-3.15134
PGGHG	0.272558	7.79895	2.60381	0.0133903	0.128196	-3.09055
ESYT2	-0.282484	5.58316	-2.60347	0.0134014	0.128236	-3.14989
HS3ST1	-0.514202	-0.296856	-2.60324	0.013409	0.128243	-2.87746
AC103858.3	0.378901	2.99043	2.60298	0.0134174	0.128258	-3.05483
ZNF236	-0.388766	2.45855	-2.60238	0.0134369	0.128299	-3.00354
SCOC	-0.6792	1.30368	-2.60235	0.0134381	0.128299	-2.91003
TUBA8	0.615882	2.11562	2.60222	0.0134423	0.128299	-2.9805
IFITM10	0.858115	-1.84877	2.6016	0.0134624	0.128379	-2.99776
ZKSCAN2	-0.369024	0.734188	-2.60154	0.0134645	0.128379	-2.88602
ZNF252P	-0.231263	2.69433	-2.60126	0.0134738	0.128403	-3.02842
ATP2B1-AS1	-0.380001	0.759534	-2.60067	0.0134931	0.128521	-2.88849
SLC35D1	-0.267761	3.0201	-2.59882	0.0135539	0.12898	-3.06101
MUC20P1	1.28326	-1.94598	2.59879	0.0135551	0.12898	-3.01506
TMEM243	-0.267694	3.13	-2.5982	0.0135744	0.129045	-3.07122
TWF2	0.219701	6.518	2.59816	0.0135757	0.129045	-3.14282
AFG3L1P	-0.19705	3.50509	-2.59719	0.013608	0.12924	-3.1033
AQP10	1.08636	0.891858	2.59713	0.01361	0.12924	-2.90361
ZNF570	-0.229511	1.66581	-2.59655	0.0136291	0.129337	-2.95121
CCNT1	-0.228601	4.17061	-2.5964	0.0136341	0.129337	-3.14394
PRKAA1	-0.27404	4.85936	-2.59619	0.0136413	0.12934	-3.16451
RSRC2	-0.155568	5.02202	-2.59545	0.0136656	0.129505	-3.16879
SH3D21	0.338742	1.70238	2.59523	0.0136732	0.129511	-2.95998
ZNF181	-0.468011	1.39607	-2.595	0.0136807	0.129516	-2.93326
KIF2A	-0.269273	4.02436	-2.59435	0.0137023	0.129626	-3.14076
CICP27	0.41102	4.41781	2.59424	0.0137061	0.129626	-3.1619
DBN1	0.295992	3.85499	2.59386	0.0137187	0.129679	-3.13675
AP001033.2	-0.801747	-1.65651	-2.59347	0.0137318	0.129691	-3.00064
HM13	0.228467	6.1073	2.5932	0.0137407	0.129691	-3.16401
LIG4	-0.449448	2.55283	-2.59303	0.0137464	0.129691	-3.03014
SUGP1	0.14715	4.50408	2.59284	0.0137528	0.129691	-3.16676
UBXN2A	-0.151295	2.6673	-2.59279	0.0137546	0.129691	-3.04457
AC025031.4	-0.616199	-1.58596	-2.59233	0.0137698	0.129768	-2.99046
BTBD8	-0.390713	0.157153	-2.59112	0.0138105	0.130043	-2.89381
UTRN	-0.350256	5.46893	-2.591	0.0138147	0.130043	-3.17713
LINC01480	-0.717537	-0.531131	-2.59069	0.0138248	0.130043	-2.91009
ZDBF2	-0.582069	0.125091	-2.59064	0.0138268	0.130043	-2.89457
TTC7B	0.348013	2.39525	2.58976	0.0138564	0.130195	-3.03024
LRRC58	-0.215612	4.03419	-2.58974	0.0138569	0.130195	-3.15174
AC084824.4	-0.802674	-1.46223	-2.58934	0.0138703	0.130255	-2.9861
PRMT6	-0.32449	2.34469	-2.58912	0.0138777	0.13026	-3.02154
MSRB2	0.396389	3.1313	2.58867	0.0138929	0.130332	-3.09667
ZGLP1	0.422334	0.266767	2.58848	0.0138994	0.130332	-2.9004
[truncated: 16,695 more rows]
