# Supplementary material for: Molecular Profiling of Axial Spondyloarthritis Patients Reveals an Association between Innate and Adaptive Cell Populations and Therapeutic Response to Tumor Necrosis Factor Inhibitors
Source: Biomolecules. 2024 Mar 21;14(3):382. doi: 10.3390/biom14030382 (PMC10967957; doi:10.3390/biom14030382)
Supplement: Supplementary file 1 [file biomolecules-14-00382-s001.zip › SuppTable11.xlsx]

## Sheet: Sheet1
	BL-Res-043	BL-Res-054	BL-Res-066	BL-Res-069	BL-Res-001	BL-Res-018	BL-Res-025	BL-Res-028	BL-Res-032	BL-Res-033	BL-Res-042	BL-Res-002	BL-Res-004	BL-Res-005	BL-Res-016	BL-Res-017	BL-NonRes-062	BL-NonRes-006	BL-NonRes-020	BL-NonRes-039	BL-NonRes-041	BL-NonRes-046	BL-NonRes-052	BL-NonRes-059	BL-NonRes-067	BL-NonRes-023	BL-NonRes-024	BL-NonRes-035	BL-NonRes-038	BL-NonRes-056	BL-NonRes-009	BL-NonRes-019	BL-NonRes-010	T4-Res-002	T4-Res-066	T4-Res-016	T4-Res-017	T4-Res-042	T4-Res-001	T4-Res-004	T4-Res-018	T4-Res-032	T4-Res-033	T4-Res-054	T4-Res-069	T4-Res-007	T4-Res-025	T4-Res-027	T4-Res-028
ENSG00000000003.15	13.1632088519848	10.1934780360021	4.6263651992936	7.61036384985703	20.7182791921272	18.8448491142572	13.3390695874063	7.1340562117519	18.1443881055329	1.31724749260177	15.7739924263561	2.08725076166178	20.8475211057706	17.1236091353333	19.5172463813018	2.6533107182345	22.0600218703741	3.51519449810174	16.9529529725772	8.29603624608655	15.619644353163	9.20476477548708	27.3760156261309	9.30041365332342	10.472952105172	9.39213508178525	13.7807345510749	32.7049076612986	30.5656832409528	10.6520761322349	15.1048814899224	8.35720909172233	25.5454685712881	23.6871385504473	5.18339220068045	19.970301299593	16.549346068092	17.2262978758471	19.123428611424	15.4898501879354	32.9803888484954	64.2855692678102	10.5585164930215	13.3701618252132	14.2193666027411	14.3694269799689	9.09055156881258	1.09251253089417	5.01805608854571
ENSG00000000005.6	0	0	0	0	0	0	0	0	0	0	0	0	1	1	0	0	0	0	0	0	0	0	0	0	0	0	0	0	0	0	0	0	0	0	0	0	0	0	0	0	0	1	0	0	0	0	0	0	0
ENSG00000000419.12	220	96	179	122	273	162	118	162	303	66	215	93	81	83	236	101	509	184	348	98	198	355	298	100	80	248	420	415	565	220	296	76	385	537	327	340	323	814	971	151	404	384	89	159	257	83	216	92	190
ENSG00000000457.14	475.795200147769	335.785459925968	453.686224585021	500.999773308367	718.778550847478	885.628885578157	341.440037940746	520.050478822256	740.875790062759	263.078070970001	588.064695424476	240.574853561364	366.337957044785	318.433372245479	689.67194008528	237.157723439095	704.53038475968	490.386222718271	609.625137458636	351.66199976504	399.530709947339	551.392618429715	646.677000434385	475.958175736998	296.497355100415	431.182998331361	984.699553747363	1060.82802596476	706.504171159571	656.825720579138	893.415833200784	330.913455527953	1040.15135910775	820.485791678212	616.736365616914	954.119953747364	592.476969671729	917.115525268207	972.402938588359	710.199812640716	1182.81806804284	814.683607962852	291.673820986761	488.230017655589	866.608545034908	362.129405031115	419.091473652817	379.434245974469	420.84455291938
ENSG00000000460.17	64.4561537195903	52.0774347623779	50.6368459348757	56.7392901108679	82.7053376912617	78.654505272498	38.8236666198334	77.1871811665521	76.2701408811076	27.0056631785356	50.5972706974724	22.8537748928033	30.0272024944506	45.7913479196922	78.5514589178348	38.1844568793012	95.444905253019	48.073216438601	80.406731687793	38.011557749404	67.6553679692727	76.628592838621	66.4203356707477	73.3733684740602	27.6124501074057	45.736816631763	119.135899326292	116.757308197955	58.872220989267	65.746601910935	86.8788295684503	37.4376519002157	111.983077280943	66.7600714835255	59.6070257061451	105.375430357633	78.6669430426738	130.080060959358	120.827448378041	55.2126047195285	119.187559375627	113.280333074776	23.6420218391331	58.7187824185744	76.5241852070814	32.7410610200231	51.0395045540763	32.9661994564383	54.0500025955846
ENSG00000000938.13	13515	8705	12706	13515	19219	21512	12184	11246	21946	6131	20072	3730	11227	9042	10959	7298	15844	12432	13069	10066	15228	21332	13468	11660	6244	10744	20826	21090	12865	16309	19846	10307	21322	10187	11943	14721	11312	28400	15349	18353	22590	21492	3482	12230	17010	11534	7340	7696	6686
ENSG00000000971.15	85	43.2363643842061	31	47	84	28.2682368334969	11	50.340644739083	26	52	69	67	41	26	54.4510752778107	35.050898164689	42	45	151	68.0111723953231	41.3347651431791	68	54.0631258510636	53	23.8668146503885	32	151.968806757786	136	72.128865094939	63.027825677444	158.622212141961	45	141	335.521650006753	16.0149165149838	109.030143961878	121	194	299.187087356819	95.5464919313967	135	45.1510240995797	59.399793947627	58.4475162964203	126.924497198467	7	44	82	58
ENSG00000001036.14	381.396639628978	192.259073747086	263.454590432253	354.548516078538	596.850004600561	593.343026531291	278.311747303288	353.725147140898	537.679341806725	183.921178367419	611.551184157186	159.839672592813	251.023593638116	89.4114833169887	330.894230036252	201.098986221584	452.315198102742	215.529585009311	550.183829054487	243.044549189267	263.229506980714	604.743278471587	391.912579873909	404.911127384198	185.072629688511	353.75841067929	701.824361612809	715.43521751862	512.373143423058	429.633094595593	847.946406164392	270.372522446473	763.509496347155	617.17213820175	321.948214424667	546.250871131878	347.322905708421	1028.84585710333	766.127665722245	575.002504516326	542.191753059933	648.932445926542	225.841063716022	353.809389931712	534.332213182706	391.045254554718	360.125413519938	349.741735678273	268.759210263744
ENSG00000001084.13	253.869779445792	196.437231839746	260.395480968388	283.460704485395	445.265209570133	536.252039409368	176.998180531448	390.501008309552	412.616440093196	203.267515988837	278.231377609911	181.012458677523	78.1126144095445	62.5911590455364	274.976498329207	306.107370981213	374.63213686872	286.440927153625	470.080305203601	300.975475356792	297.765276460364	402.326539469953	408.618584793424	402.792377049143	146.273261125967	281.24636867644	549.081945842545	748.502915033248	446.049778213255	398.139653564803	624.281926548015	196.181004329619	755.350929481498	625.067984639234	312.241346210598	628.071963835692	463.354156396311	602.254918753361	718.316992917557	313.769067025385	714.197274745008	546.487591177662	204.330604295653	316.209991247267	601.281784646457	160.897741205426	197.059667507706	180.529991218698	275.335936799886
ENSG00000001167.14	621.888118592518	513	623	656	830.71236708162	1446.55997967314	412.182338403578	670	1022.73396746545	301.983134653458	839.756186088689	249	212	324	518.832277841537	287.947300095004	795.45022142743	616.862109930922	856.847736685946	474.751762866223	747.935020383214	738.927647196181	868.387298017337	635	395	446.953668711808	1432.87473723957	1214	782.722255542309	844	1339.85079792422	426.927796762374	1444.40391454739	825	642.688821850321	1064.90372593977	673.866166956218	1098.74714896599	920.768477064206	635	1642.91166891744	1117.75412415852	168.883131594967	697	1108.7764435323	404	558.674623755896	347	515.844811200529
ENSG00000001460.18	61.6521082685897	67.7921045991124	58.9726030853436	55.4803925185501	77.544500937769	121.732409327175	51.7724063301358	82.1634108623721	111.440603419916	43.4147060105751	78.3880293058151	32.3761093902569	102.194369621707	53.0258954697781	143.848426824778	29.1619321788996	87.6310609923876	75.5289206672732	82.0818953542933	61.9377813094034	73.8999089278559	90.7183994273767	123.015240488193	99.8621555171366	55.162484512571	53.5453645215708	147.161862593734	129.587411584267	124.125299539526	87.3943800740138	112.793921221286	87.1560467330027	147.429692390628	79.3078813996788	79.8816182676064	133.206576602748	86.9284776911041	104.769130454967	144.313166412239	123.4106586064	145.994295296479	233.106811088315	109.851187097268	75.4856183269568	153.332707265486	49.7191994513667	76.3032220288041	50.42895907993	34.3469384475813
ENSG00000001461.17	832.25903612365	456.749936546751	777.840122528752	761.48245067536	681.256015781093	1337.99507351122	618.293475588863	793.349208310724	970.668701859831	396.171624904896	630.617013893384	342.399551356535	386.236628492636	207.209263827008	944.899241281298	366.886152814662	1038.47178954547	752.37415780001	865.770691980376	548.529204731118	488.040470384907	652.990067440135	1056.39404212492	1022.15021365122	462.208122470443	453.242834399504	1379.98053934831	1716.46221601532	1111.18337571663	831.532973050583	1629.23505751736	493.083535607611	1898.09028147419	1135.76435006598	758.774901966841	1380.00223273617	881.262815475413	1078.18828329975	1512.36833068235	1072.88397343105	2104.39517108204	1403.82637446442	479.478937622542	861.820188303875	1878.1558097805	548.225021622214	780.529695167925	542.112902599721	785.927658237213
ENSG00000001497.16	455	276	349	469	456	701	351	537	628	237	466	291	339	118	613	274	575	410	439	427	304	633	727	749	310	309	886	857	700	575	962	363	1108	754	539	906	612	832	798	974	936	1020	287	792	1217	462	369	442	495
ENSG00000001561.7	112	80	129	144	193	273	69	210	215	60	129	111	19	11	78	36	233	208	461	105	179	112	252	206	51	196	259	438	295	357	385	92	458	503	109	219	254	306	537	86	384	236	77	156	241	59	147	67	218
ENSG00000001617.12	1	0	2	0	0	1	0	1	1	0	2	0	0	3	0	2	0	0	0	0	1	0	2	0	0	0	0	3	11	0	0	2	1	1	2	0	0	0	2	0	3	4	2	0	0	0	0	0	0
ENSG00000001626.15	5	6	4	2	4	8.88737947298724	3	3	3.86622298093705	3	6	7.95434999248234	9	3	19	4	1	1	2	3	5	2	10.8000298324545	5	1	5	11	7	6	0	3	8	5	1	3	4	3	2	1	8	4	40	11	9	3	7	0	13	0
ENSG00000001629.10	332	191.693478734666	286	432.539373082503	500	701.747621096594	217	560	610.67193613215	173	369	169	79	94.4628308369704	351	124	534	461	704	249	326	473	574	407	202	323	716	1018	631	622	877	151	1158	700	393	800	487	809	1045	310	1262	801	138	449	846	157	333	123	472
ENSG00000001630.17	149.289208100944	89.6121915964657	106.493501150856	146.882560062123	172.772003295102	228.879032606506	83.2094797642978	164.268576132746	203.725276137468	63.3381840091681	142.500833657764	77.2666124964726	109.295616224731	48.9061608914366	162.393573703964	71.6239948591298	154.358205002283	153.660428858764	298.471311431479	124.390370725033	110.789304342484	193.605303617409	197.246169456737	215.602754295817	84.6100510603166	110.153617987808	215.075528187819	378.570543493196	172.814766840231	137.818427034595	388.529080725335	107.270693528957	294.106084370389	268.444360768764	103.231882127394	246.21684933121	185.950910286904	242.756445464725	239.318232590869	296.478779527275	258.711968038401	298.715806497315	63.8374052556571	181.07804679112	290.681331001808	95.7497077299266	110.46915239538	119.939055341371	143.262541940331
ENSG00000001631.15	330.32430311248	211.850668618925	368.730889104426	406.153175167002	420.578902510365	671.253600317843	222.99130201299	459.368504108053	535.670278850096	180.234986970197	383.59285992552	178.399534053477	124.142104596748	94.8725144570885	403.399383755967	129.079768006335	563.931299385853	407.176774569781	604.440569723637	268.770114653699	345.632883057764	432.323353282584	514.974229788311	452.010381781297	204.133984607825	370.925326840859	726.741679189614	793.250599225793	614.719478647545	573.162466036446	808.17964270881	203.54867039413	1032.5912914627	700.205919412689	318.650101078899	711.970767987344	398.227090450074	658.403115347128	1006.90035392166	409.180345488667	860.208709553598	629.304800298368	170.626730491711	466.059646463187	741.528661830755	157.523187559837	361.911409253625	182.16013814621	395.764518501546
ENSG00000002016.18	182	130.992476614874	178.869701706597	181.652928299084	269.488495943798	258.637289965661	170.039872592805	197.561772726904	278.926021330099	88.5921881750574	186.435355015777	68.7885610522997	161.882585468891	83.866114326972	207.389350001456	101.705527404727	274.602161304245	136.001673699884	229.638495739774	146.040299163185	144.274076428174	202.284170848248	250.477422799947	256.695486640101	115.811214176073	139.11169079842	395.389714590028	381.659013011887	223.723731948066	250.654324591622	332.038300978036	141.993581806634	467.308537513182	226.29478627026	253.182881844108	325.309598926389	231.596652570007	285.952312557318	470.132034762572	302.47592783957	548.738307282838	391.006392770819	81.2146058433448	198.328940190606	364.651779558059	133.895763395632	192.916591095821	47	169.214685377793
ENSG00000002079.14	0	3	1	0	0	1	1	0	0	0	0	0	0	3	4	0	1	0	1	0	0	0	1	1	0	0	0	0	5	3.68367777008774	0	3	4	0	0	2	1.06787172273667	1	0	0	0	18.0670901950171	1	0	1	0	0	0	0
ENSG00000002330.13	281.331552217953	148.665736438683	185.853729742524	241.487260036032	403.39994733165	366.510796499867	265.349778199581	229.452566691319	394.33135530166	133.152628359284	350.137856825269	114.071429143452	350.205967534391	133.33118453073	363.284911800715	118.315597847366	379.415999359069	169.616495874708	267.079881021506	158.644508157677	255.276085057354	297.356235141187	329.707033991672	183.079850957577	182	196	474.107849708764	392.907487638044	337.514198661828	311.980770984902	413.220218587928	232.604150063368	397.573217550205	356	242	413.233442987325	260.229002261723	518.18866180668	509.265489415501	463.413197436904	424.157516718627	377.701734571828	167.979566461543	337.474813518227	371.036985067445	246	71.604372748396	166	137.193577574123
ENSG00000002549.12	739	530.946575121139	762	771.98904567823	2211.62760452252	2587.97519859417	1339.91102867499	3115.97412628835	1479	639.991556143542	1365.96960724627	405.971739727795	626	224	1179	701	973.97186619052	566.990166801043	1187.96902229147	657	529	1610.96137983819	815.973613105179	1506	1011.98490682388	622.989605339833	1540.97498510201	2455.94597665722	1819	1025.97408014018	1903.97111916254	556	2507.98648320304	1670	1039	1496.97447663898	1178	2725.98958867856	2483.96918805547	2279.97068113518	1251	2847.95919401695	603	1152	1458.96003898819	1036	1598.98839691717	1062	686.98981188727
ENSG00000002586.20	1490.5	721.002665761712	1035.5	1585	1770	1707.44262052407	1690.50109164318	1275	1715.38884378378	1047.5	1644.5	891	1724.007362929	481	1675	879	1369	978.505853185464	1795.5	1089	1193	1079	1590.76690788723	1790	837.5	945	2406	1953.50155374173	1724	1497.84717551928	2783.5	1268.5	2602.00313442192	2362.5	1273.5	2023	1902.5	3082	2308	2687	2127.5	2114.85946726848	1066.0148894459	1485.5	3054	1546	850.5	977.89240434226	1234
ENSG00000002586.20_PAR_Y	1490.5	721.002665761712	1035.5	1585	1770	1707.44262052407	1690.50109164318	1275	1715.38884378378	1047.5	1644.5	891	1724.007362929	481	1675	879	1369	978.505853185464	1795.5	1089	1193	1079	1590.76690788723	1790	837.5	945	2406	1953.50155374173	1724	1497.84717551928	2783.5	1268.5	2602.00313442192	2362.5	1273.5	2023	1902.5	3082	2308	2687	2127.5	2114.85946726848	1066.0148894459	1485.5	3054	1546	850.5	977.89240434226	1234
ENSG00000002587.10	30.3205445310221	7.19569176793404	17.4898295832779	42.1797211786725	18.4335286711461	31.5170822488126	33.453754796107	18.0433782371697	37.4645365193009	15.0901473173274	12.819545060876	8.00165284039825	15.0013711627622	7.55978791430915	23.681116784284	6.56452826113263	66.9962896381564	23.317928546238	45.7130345729717	14.4560385272394	13.9620797775593	37.6677226528631	41.1139988954068	42.093979705332	17.511869399321	14.0406974864545	48.3049936317025	29.5423005260498	67.8537639472159	48.2924899665535	46.8899174363943	19.5215805527155	94.3405514032447	43.5032904671518	9.04400595893645	46.7281843526391	14.0345605786942	17.032076942303	65.1343218843982	73.384341691687	47.374845254629	70.8754682790707	17.6263293895203	33.6121253943664	99.3154593186401	31.2501443905374	63.336403360768	13.4106470352899	25.0317425033426
ENSG00000002726.20	224	36	17.0008667423164	7.00012791894141	76	14	1	70.0751749644519	19.0007937531639	79	76	3	60.0005767917173	17.1121705437047	6.00011687152581	7	133.223150994299	14	88	28.000000303539	8.00413124888708	4	12.0593262874934	4	5	10	129	86.0502837530858	77	9.0003502134794	201	109.002533098037	5.10463684610004	5.00003085586595	7	31	4.00025302257364	46	15.0003953037643	67.0004369815667	2	42.1882138136126	38	30	9.00138606270158	19	8	23	44
ENSG00000002745.13	6	1	7	15	25	5	3	14	5	8	8	4	2	2	7	5	47	16	11	9	15	12	21	18	6	19	13	12	16	31	26	10	38	59	5	14	13	34	87	11	11	21	13	34	31	7	22	20	11
ENSG00000002746.15	5.28940866603555	10.4615511092683	3.07986191383638	7.01410542058166	3.01056346165046	7.63675729090717	1.18872829167804	5.03498041340377	5.13772847036213	2.01596988195531	2.68802235871145	2.51521094207525	16.8452617319987	14.5488696723893	9.46178522349178	4.91379319348889	3.06704125340904	2.06105853494184	1.00868140928021	3.88405218084104	6.92126662271723	1.99300562207755	14.6624114659185	4.96963586934685	2.12665304058723	0	1.01068346992307	8.10134801564643	13.6845147811999	5.07360088097118	3.03003914698608	16.6376905829452	5.11768023886184	0	4.08090199556136	3.78901026867389	1.02139281483155	6.46415673894751	9.39769036837841	17.2547217220799	2.00265710403789	47.252280047927	10.1976827163864	6.17103520474473	6.65116955016114	7.82910232989933	4.00220716332468	5.20088502037869	2.01714962284492
ENSG00000002822.15	559	321.916772382955	421	613.831939336386	660	1107.19326573842	572	573.136281149042	687.078295446627	337.244583625211	568	285	640.062797732465	185.974144747685	972.22694030353	327.730209620892	737	450.93200839254	614.182876805302	386.271192741476	740.758660212177	715.477279382134	772.234522802296	819.923025144588	414.643073876865	553	1142.91123257226	1195.46498234062	930	759.51020929125	1291.58648971514	624.319272079821	1533.23949597425	743.767373780662	655.594777286703	1115.56363294947	725.300306062494	860.785193642697	878.667975131164	1262.34127453389	1424	1068.4383309401	417	939	1490.9399578451	913.047085179327	464	669	609
ENSG00000002834.18	12177.340219309	7428.76262218768	10389.6467021151	12379.1058128015	12626.4775333857	16986.7105195847	10089.4779326306	9403.85903205884	17729.5265439173	7176.0356196523	17897.461707228	3003.7889176413	9788.02840546987	8939.07224361012	10359.399202009	5929.22913229547	12705.0204545808	9177.51731421169	9123.6779791587	9597.632743766	11473.9423826247	12043.7501429538	12624.2715316103	11790.7364378819	7110.04165484813	7292.61824067733	18029.6673182262	17178.5198945743	10054.2072012348	12661.3963882043	19076.8836395868	9541.17711748211	16728.6414783721	7850.77267386823	9917.13389923707	14872.2653827869	9318.10220351814	20626.3412217082	9963.66859218931	16722.3955426679	19485.7180140958	18144.5174638408	3106.87456131579	11799.4747868991	18045.6963511359	10819.5317954259	5599.89284804003	7890.52048959048	7375.50321587096
ENSG00000002919.14	1538.25117789853	715.407006867108	949.010638949213	1637.62089365841	1943.39516626594	2295.47507288331	1278.3011300925	1093.56008070156	2468.76611754306	788.004720231763	2078.74424396095	332	1169.7169573581	1182	1139.74154889265	638	1942.80486891579	979.496906015548	1157.00000000648	931.729280251418	1428.43369108646	1515.95014040168	1442.20979446879	1259.14375112512	910.802795606094	1040.00727431982	2570.60696947442	1993.22577128751	1259	1681.9382829465	2267.56326113679	999.471137478146	1836.82117401953	890	1339.3155862933	1571.36052057993	1105.8761839006	2824.80946317276	1755.00296101576	1946.06744171557	2059.02609698592	2169.52379227484	405.134951341643	1138.00075280251	2205.34901617525	1208.41242348756	644.406751635912	811	861
ENSG00000002933.9	1588	415	114	160	1430	30	48	1324	221	711	1144	23	1075	157	242	146	962	48	1844	570	74	371	54	349	73	762	1299	1105	525	163	1433	456	33	16	149	201	123	1759	1063	1187	29	244	543	107	200	56	6	482	665
ENSG00000003056.8	3486.00923430985	1552.52965216679	2206.36636829164	2904.80003499986	3646.93531567037	4134.67283028407	2405.73248562938	3211.96287774473	4192.35380512271	1520.75596639811	3579.57838682509	1343.72328416349	1946.30165921337	922.401517216185	3135.86432355445	1462.05368449586	3686.76826728822	2480.57174934698	4016.85520351898	2197.0064196015	2099.54080383648	3899.95090314029	3945.14843852428	3743.28310886803	1794.13525822081	2276.91236044483	5046.40061985756	6277.14010132991	4280.50386596383	3863.21631323734	6264.0839006981	1990.21803718674	5939.7031359446	4662.07088767094	2790.74571553395	4846.23630268932	3556.46833116042	6549.06386711739	6170.49572895402	4580.66113950174	5357.22824692233	5418.66718790244	1494.20773555473	3554.15045868619	6110.93623495077	2580.77214020054	2373.06457175393	1721.46728371125	2561.42521964372
ENSG00000003096.14	15	3	15	12	2	28	1	15	13	4	7	5	4	5	8	3.03426107275869	3	6	10	3	7	16	18	9	3	9	9	23	22	15	24	6	15	15	14	16	7	6	20	4	18	17	1	8	16	4	0	0	14
ENSG00000003137.8	0	1	82	0	0	0	0	0	0	0	124	0	38	2	0	0	0	0	0	82	1	40	160	0	24	42	0	0	2	1	71	0	0	0	37	0	0	116	0	47	0	12	0	0	0	0	0	95	0
ENSG00000003147.19	70.4631370600789	62.9602440563825	58.7373882219543	85.3063797434985	92	110.103571665322	43.0913541551573	59.715870071635	130.233289353521	25.8229974654819	81.2198443078062	15.006700962647	62.5254747976667	64.6303984508032	72.7349846768243	46.3020905589116	100.37956681583	48.1520717762747	57.8715681648749	31.6408393449007	60.6437789386641	80.5572049413344	96.2686179168208	56.9230313668543	60.6203401921561	70.2255710886762	163.308960643247	140.095626398082	77.6786638841908	78.2942124614812	106.259577477589	55.2688112922419	119.392594082458	55.4973935831748	75.4275237696397	69.7999898076917	51.5098323575373	131.960795016054	83.7707939682784	118.10593800949	127.343710235223	160.177479124182	49.7861883817172	76.2773963492565	92.6269487122157	86.4348143958082	30.3940320262404	114.88569212484	39.9895804011097
ENSG00000003249.13	70	22.0024312484514	44.5764097490934	71.0046461047692	30	85	68	95.0025245185448	75.0051996589609	28	24.0002406568754	23	29.2480124129665	15.2008340189251	42.352973846377	16.0016737695914	105.706579585408	36.0867732549996	54.0175428377146	34.3627875055942	27.3769121484232	29.0004050284717	87.8097811969422	92.1318116140729	64.5059941377757	22.0005067572831	122.000523586935	42.3943534706125	142	122	138.005015502885	109.770160742411	218.305017900635	79.0015591088473	43.3450528655737	86	58.0005885470528	64.0033116498344	62.0120523595118	106.355107852102	119.015026258703	140.063938142339	48.019100977799	135.305804784039	245.004582438662	74.0066429917849	102	47	140.302803065708
ENSG00000003393.15	241.108459491056	151.049912404937	208.633060392288	229.153372594404	261.379231980524	412.154647224991	157.019180028158	243.856479022499	231.621226701593	112.284322956126	266.905390902788	91.3935712750511	96.4281645020226	69.6874433913336	211.284603505963	80.4298977793739	326.497363129758	211.465584055972	248.372286098949	192.778024436198	188.807101358094	214.370252674149	290.397567413539	228.068605798664	119.834806376844	183.04203773361	504.120439173334	551.659327833136	318.504329294411	266.809815458356	439.692780849667	149.391877662992	464.13791385612	297.40272191034	196.899959085052	433.380506874558	257.13464683126	456.742529765473	319.018270224587	265.936728416389	644.279515516589	396.495593951901	91.87388855548	246.698258450861	364.296994174956	154.850920862975	161.365162402854	85.2326707227841	238.850222733409
ENSG00000003400.14	1199.22854444807	736.231973159903	956.209662599467	946.359692239964	1244.9341410895	2075.51934365061	986.967400986143	1513.17714568324	1626.7375351475	566.696498545081	1386.24033687568	398.925159077323	613.134216438603	568.820152006181	1121.14206616912	416.029369628729	1601.31532813409	816.699653046626	1428.26480312239	772.693942495292	725.520616653647	993.521114893395	1172.54360110321	1220.66205649828	545.467104460639	721.178347678479	1749.11067762269	2257.19409030118	1316.82291813824	1433.05403421448	2111.73800716769	673.336637928792	2270.16937270198	1213.7636105884	1106.46573774239	1843.52920389567	1052.87632694355	2217.28095355748	1740.97861324233	1400.42623184877	2332.83805350403	1987.56676967631	476.620452991958	1175.15080085852	1716.31983203349	860.862061094289	917.209986830097	566.551801793222	858.779705466786
ENSG00000003402.20	13164.2704346851	7951.37184925628	12757.770201835	14100.5116029611	17709.3384312771	23482.4225917629	10227.2135768147	12259.3628910137	22372.7723462756	6055.93599954508	21104.0500009594	3004.68040969933	7494.71635576283	11738.7381235327	13137.4219249764	5017.46675167196	20190.3167093714	11656.9348963084	13829.2660786954	9740.22022015542	15515.4242237044	10716.9149774838	13524.9689241468	10593.9884871607	6755.48385229915	10243.9404464488	27418.561249374	26791.6941015596	13503.2849229811	16020.4739030324	18205.779221618	7825.13250034931	21330.1766253648	7979.87346330787	12465.8582642231	18719.2025770738	8677.05296932717	24276.1568874306	15906.2165348256	10928.6636035744	30001.3452096447	21581.267515156	2879.62287014527	13012.701682101	16124.6546043156	8649.1679522651	6825.43358866269	6012.35001934428	7662.18307812557
ENSG00000003436.16	82.4733231100223	96.2940147417876	97.9958574436176	82.1060996606286	173.669582276077	261.204996685811	77.8084449460142	150.374757965678	165.499421490773	51.8307840835622	121.141447177208	40.7285015754068	70.4452589244812	170.395396560981	140.413594875738	32.6840949817811	171.488109118371	95.2551404580048	145.135115400577	71.6938072771967	115.059531226239	163.589743339523	157.19387644888	109.890716464941	52.2158486754358	79.1833426090986	183.512398571241	225.883809628746	138.449935646755	185.769245652245	177.528494309236	118.568949551144	291.794428936022	159.366031502589	103.887162505659	219.558423745871	110.508943869023	167.483918509331	263.63590730833	96.3627032674926	401.060759746122	529.751945736186	82.2016282832732	129.507299048529	156.662019009435	51.3085722404989	117.514440293056	53.3297588242256	100.370115601669
ENSG00000003509.16	180.195429769221	110.310449739862	140.08564318794	129.12214028251	239.860016091032	207.619408248455	114.610129239378	141.534716917803	276.307719452699	56.9779076347684	174.67169972777	59.6873359913322	69.2558527400815	75.8931324813342	215.021249876454	58.1399006524957	297.236925718213	132.912980900914	247.459090189429	101.923277415962	168.202931981409	220.395669339634	231.636763166984	166.941115859809	90.8154451251634	164.809949658541	411.543193274228	393.928913059639	303.13486163733	208.477178619374	260.274804149443	103.968674992674	401.528793383808	346.08216169081	192.388038102041	290.653850542636	190.953824745164	461.434803181309	567.369915432781	132.95795871993	465.807336154928	281.201909435031	65.5988435581566	196.169215416378	281.937744938713	90.5280667992646	162.45287993679	67.3892161394886	202.329818194602
ENSG00000003756.17	5940.32227752552	3109.82853786337	4834.92731314926	5048.06141308529	6714.55453591714	8696.88390342199	3904.35526482199	5041.8155476161	8740.77086385869	2272.77384353627	7400.35272027287	1726.82421003047	2814.29821233832	3097.28110411554	5179.0325075599	1868.27404443943	7996.19147930757	4155.31156994524	6064.99839918381	3797.62037758779	4724.34142939513	5242.97390509087	5579.67365519474	5163.2385053815	3137.48468433534	4472.77450952054	11087.0444346207	10826.4518079773	6641.24507368574	6962.95683812468	8388.51774742685	2756.04424853655	11089.7723831318	5347.52122764291	5222.82353743297	8414.80064229178	4894.83481532028	10783.1777495377	9761.80099785788	5770.04327409657	12331.1060106646	8375.07218389278	1428.61262219682	5965.0799089665	8081.05900879948	3481.23498138301	4120.79599711628	2892.93552423571	3735.51188617393
ENSG00000003987.14	22.650709778958	15.0324876622977	21.2413468369383	21.8951503781209	28.2880467647442	42.4976386613539	24.8350812944844	30.7867724936436	52.9911704025805	7.65721215118467	48.873501022508	8.40964799855241	11.7671335837228	11.6706205472893	33.1064267097126	9.07184635424071	68.448037862374	18.0208435382686	36.3327394958068	18.3979090275589	25.4734022964633	31.7949782393018	51.3157279752426	24.1201901394979	22.6391682329754	22.7181227938486	57.1562073519525	64.8824160597123	41.5061459990652	46.6471895522258	72.7803987578215	22.8399254677034	42.7836820091134	57.2646734114619	28.2943390213093	53.269348480458	29.6097291160621	71.0406522191165	97.6214120914819	21.1233671197733	73.7467571020606	51.7107625851556	9.78326865850418	23.2898732513492	44.3535738681892	15.4832265109911	21.2236117749012	5.4711850756686	16.0456044591376
ENSG00000003989.17	4	6.0009385515559	1.00000639290327	1	2.00001056113149	2.00001355997024	1	2	0	0	1	0	7.00209829135239	14.0002115961856	1	0	1.00000257967068	2	0	2	0	1.00011194007165	4.00923273424419	2.00001920354969	1	4.00001611829924	16.0000644185943	9.04138972822372	4.0000398163789	2	2.00014798158349	5.00096696221312	2	1	0	1.00000689965719	0	0	3.00000958952468	4	2.00012565722147	21.0001725317433	7	1	5	7	0	1	1.00000830783193
ENSG00000004059.11	2797.93181452407	1329.94063143553	1873.8622564162	2305.67076974409	4025.81043357014	3160.33313426497	2955.91638729598	1827.17283822962	4170.78074517618	1517.92563140274	3601.83817793527	873	3004.11392852169	1635.97834458835	2794.70480624248	1402.70946922161	3479.45780891831	1780.73434036462	2633.96099488314	1627.74253534483	2356.56737658666	3272.83223602611	2692.43680532191	2195.72676016806	1615.92889459336	2093.59028816697	4387.52411171209	3306.15058456285	2829.15781527549	2733.96547720141	4436.58477038423	2079.97219723796	3864.58450778262	2550.90900894524	2546	3281.45270890489	2301.97223606843	5809.70889102907	3879.92459029607	4564.8629799448	3491.59182426866	3707.5242952052	1142.80810683947	2238.99309213902	3214.871700783	2558.91702751561	1658.51578233161	1794	1451.99994669482
ENSG00000004139.14	466.663289575546	285.339531939086	320.043048207758	340.274926532294	493.461243251599	704.192769878065	333.430686523305	515.387102580475	702.161150340838	256.531323584501	340.418563622181	291.899682682835	222.145325407579	98.4357364282966	538.679596232888	169.028925561186	521.283971740805	346.879321429577	482.561787894483	358.001683643431	266.705520793991	350.516072372397	599.18380431621	605.430270133765	282.648024215971	314.62424611081	980.019815815589	743.764423429981	644.422420495876	596.201030186036	858.667375329143	247.498275082033	1163.08641936236	731.688153719536	466.095261934925	777.669644096165	621.377075348021	754.594790285982	1291.56235061948	598.209272616302	1141.80600137324	814.869508189889	162.635067380697	608.474126849388	970.631624998055	222.35027245443	393.934668599045	350.990531719667	481.198604861153
ENSG00000004142.12	760.64632899327	528.789799716655	722.817835646724	820.205946841064	997.224001485882	1142.93855565367	758.649911044366	801.396441116056	1162.46758587105	487.647655657704	892.456795082963	419.907465855329	771.007421659943	381.455457828844	1025.55124564958	552.427512045924	927.922640206244	572.008108427182	807.61162044725	640.559376200569	667.620997468123	1038.63492561586	923.015939176574	902.94984765304	598.70715147514	572.744413964374	1359.77606366989	1338.4031131886	954.542843806362	831.229112121395	1533.73575740751	711.482979829439	1416.73870129921	951.960129053245	757.324016684624	1212.9117428909	922.868039968277	1664.09205292821	1148.26540408832	1471.02806462679	1369.2092666744	1393.95006074777	454.804950411922	924.236932667775	1593.19039326777	768.272291290257	596.821083656497	554.518948935697	746.266512653354
ENSG00000004399.12	1155	828	821	1130	1652	1688	827	1161	1553	848	1926	757	1248	250	1255	580	1038	734	1366	938	723	1810	1780	2072	594	852	1930	2169	1127	1425	3120	934	2504	1934	879	1343	1086	2577	1355	1781	1637	2126	409	1657	1837	1482	675	933	1069
ENSG00000004455.17	1553.23405039662	899.902081306408	1092.47166123637	1458.94303497724	1873.66311855395	2077.38129930359	1248.77149304348	1425.12055949758	2231.07735691373	698.469650812857	1487.84585100778	612.00614386277	1008.81573981672	429.541406423592	1586.22744695532	722	2054.40352477294	1200	1993.79466747985	962.359499373723	1123.85845084697	2173.87550627214	1952.06202240353	1621.12242123177	840	1148.09850547641	2712.79445160507	2916.38247751333	1873.02174921743	1855.93337075863	2942.71400200609	969	3106.98542372638	2243	1457.55972462389	2587.8953598386	1654.19623271442	3081.77661744659	3130.67003416589	2008.93687787393	2899.36176968074	2611.76306107586	626	1639.42366285286	2676.59357941886	1323.46043751859	1183.72389232238	1028.8210535104	1314.12058232312
ENSG00000004468.13	195.602141594085	227.092009421179	320.510241362145	208.597569830563	286.364153778171	545.707526176004	360.270888087016	723	517.512579309603	156.743280465351	241.427622626216	113	105.251667503852	94.1578953965793	367.650939221954	83.6356917051489	408.191699598943	222.205354091651	415.226067523919	180.421679008389	174.649943846652	567.845191891492	258.355895815562	304.792195370278	131.353692874165	193.329837128015	368.83143191101	677.173714819744	522.583831170006	478.62599747939	365.244916792223	193.090407850901	704.3333318837	349.348334911195	197.691174717575	538.6969725421	159.785355627215	511.32278118834	415.768700403066	240.320076233996	827.414475540184	1149.43140931496	116.732154379722	444.234775470868	372.444583289624	122.971014708044	319	140.841089375805	352
ENSG00000004478.8	807.873068393724	340.288307890597	641.211109196724	658.488714144281	561.656183595048	851.217094486324	474.966032823291	586.270721317193	749.937585003697	322.790358032029	728.399269282197	221.683844081714	525.0164115203	128.024343469568	820.322319041877	399.565610841294	704.746445586381	538.712963755242	590.084848728704	617.221019790993	460.442748138544	855.548508880461	839.693779704027	971.520194847753	433.892478149314	423.114312844218	1169.52588137015	1234.63783885941	747.733365735139	716.603999882415	1187.87379718945	383.463295991075	1277.41095187331	679	635.515319298299	1090.5544301928	736.774629138072	1251.00957004313	1002.43230032842	984.279632881283	1469.34334984052	1359.72527770649	360.22350177443	762.186576608608	1531.02867967007	638.173420664002	525.049148770872	464.845328866478	599.970708861873
ENSG00000004487.16	716	455	550	681	693	1111	493	762	905	338	667	345	473	171	656	300	809	581	745	551	503	983	1107	1059	435	435	1093	1359	888	807	1440	529	1539	993	660	1271	772	1263	1124	1159	1605	1426	278	844	1619	610	502	598	761
ENSG00000004534.15	2664.30373985008	1203.87556964249	1714.7175972822	2266.89138200057	2153.22362250861	2687.05987536452	1679.47594419777	2184.88244366034	2665.0088635397	1138.72952111496	2016.63667095882	1076.12183816504	2001.93817053026	980.58004584524	2521.286127947	1022.22014152506	3134.24588576389	1821.9941743117	2101.30790968924	1858.55285874512	1926.92677649847	2857.75721720946	2772.57101931737	2793.47991616647	1108.92341774122	1860.58147429873	4104.04630260998	3990.28540450903	3458.33753446825	2798.63782421029	4554.70790393281	1387.56293245516	4467.40657023562	2852.24771757399	1859.07599471627	3622.10519056409	2306.03795054265	3715.18182170103	3633.64574135895	4087.40476459231	5246.80856484558	3949.56363711311	990.820957422676	3390.96242616098	4919.34200601035	1903.65291692477	1820.72529754836	1471.45458818706	2121.87131551408
ENSG00000004660.15	717.262956142264	357.013901710648	744.285639573538	616.11693192976	756.581996957768	1016.88985820779	493.067792153146	338.047199044611	1074.17643820813	288.12279858703	1074.41272458159	186.030194507807	644.537319453728	674.11026845259	788.209448408728	308	1008.3105113431	387.486114076298	529.055347231048	350.079920456617	647.315948672212	616.039444049884	384.60106451541	370.998074239597	270.043363246125	469.126096190749	691.295999763613	787.066852231927	641.588155487253	726.127626850004	662.243561231065	467.671317611149	979.047537832552	348.03226618166	767.013709642738	1119.27468349968	524.007536049485	1300.3147896793	570.077202329286	781.716026488304	1412.08749289516	749.892865764341	172.237904075329	671.185829137208	783.013261170615	772.156244257466	270.093191071432	341.029527551253	325
ENSG00000004700.16	620.978809818132	204.494614758418	417.379290082033	558.94247877526	698.5626560516	866.797581859509	321.793647638107	711.029026422508	860.153766141009	239.058939004439	561.438443036621	298.488996195795	174.088162652331	116.458348830316	462.460687115853	217.658892252323	930.851061398563	645.937864536728	1239.73395373079	329.588202822385	499.275443479308	651.14738604415	747.700635033714	554.599728742271	283.209372880729	512.190521574163	1182.01835726412	1523.41859768253	1107.89162214572	824.263587480909	1106.85308014571	253.363454319454	1676.76317649813	1468.88218414148	566.659129897987	1113.35550209863	848.101629265763	1503.50825246697	1861.10597852082	432.478608993234	1532.93441680923	1076.79888347207	253.664983727512	533.608858186062	973.225721108095	277.767889793567	673.457980544468	271.745517763055	543.428984836283
ENSG00000004766.17	231.40793069461	130.434524369519	181.646062215288	168.236621732088	296.651957173371	364.649740327361	111.051005357153	220.260262447931	304.776161260101	69.3052925577747	268.264339948657	106.859032936942	102.6299202657	64.12535314938	222.450845654209	91.3958882476077	355.76063473409	221.616601057924	422.528811620623	110.091470430457	181.257565075906	314.078116244151	325.424284411351	265.839606256378	124.130640562539	172.039560504387	520.545642188867	620.629778871911	436.276929828472	337.994393093744	414.663729544329	115.723031271483	577.304543678184	579.674177419872	215.642066905289	435.751511862802	305.27657297342	566.389440174078	697.446439475256	253.848125966878	528.070012626403	438.307844251019	111.774545447025	213.381556042298	426.516122078045	167.319033649945	203	94.2334493474631	182
ENSG00000004776.13	1	2	0	6	5	0	1	3	4	0	0	0	2	1	2	0	1	0	1	3	0	0	6.89022468683317	0	2	0	3	0	1	0	4	0	5	0	5	2	1	2	0	8	0	4.72875	0	4.72875	4	0	4	0	6
ENSG00000004777.18	165.759621140089	99.2132201403232	48.8752785322407	79.9668792377177	135.88395544154	152.293297055388	89.7442291478155	111.886613608556	157.541923642996	50	119.777878634795	79.814868094661	61	52	181.798806369477	57.8543538128405	172.108114444011	80.6019407044965	92	113.942356202964	86.5212247447021	101.467327279023	158.887900319307	159.450144131426	68.8837632020706	54	213.171635539259	214.663449786591	155.575775660342	112	216.821187624862	102.42221023236	246.564752666299	181.872578998002	79	201.512186130971	137.718164843714	225.954094014224	222.618832468232	133	266.714000431949	244.474265751626	47.5856848550941	213.481938958539	215.580406052361	69	104	48	139.868094251043
ENSG00000004779.10	280	117	126	177	265	257	171	221	344	115	235	121	181	42	274	110	266	200	325	146	165	347	225	187	123	189	346	415	303	245	422	121	432	430	243	402	253	554	686	322	388	402	128	145	381	173	190	167	200
ENSG00000004799.8	91	164	250	122	208	1040	145	551	518	161	321	143	57	106	106	99	245	361	675	193	381	364	141	103	34	415	549	761	631	500	480	198	454	884	194	751	388	1090	455	296	484	717	94	338	578	282	252	133	260
ENSG00000004809.14	14	19.0969971036453	16	21	52	34	15	22	48	16	43	5.07151283830107	18.9479412793823	3	23	17	79	12	48	11	53	19	48	17	12	29	59	44.2483488099844	41	13.8260706174652	67	9	27.696392947236	16	9	23	18	66	55.5249186837379	32.2787707985618	28	38	17	14.3822946541294	25	22	12	8	6
ENSG00000004838.14	21.6612510585038	28	24.715104774553	37.1663434412565	26.5056675206774	39	24.2332550602124	28	46	21.7154523885547	58	17.6029443814207	40.3264776391278	10	54.964711010273	11	45	25	31	21	20	32	32	33.9647110102731	19	18	62	55	24.6029443999712	50	47	23	65	48	21	44.159758023542	50	83.773544154535	60.1705997731152	49	56	45.6882442679779	6.24117775256826	74.9715683818155	57	13	41	14	13
ENSG00000004846.16	9.29644584312142	13.2686768960377	6.43122123188686	2.0607169150763	4.20246089207583	4.15620814622701	4.25145848332887	4.09137497856543	9.70434885547357	1.12017152722547	6.58290501154451	3.03919160327922	6.62841395983348	15.6047606002057	9.37995730705766	10.3858576377905	12.3975576306069	4.29206456986902	8.23440065471413	6.19366980894654	4.12477343209646	6.1157344083254	10.3854712920043	5.09440548089424	4.78980100040758	7.07770431296335	12.7298913421939	3.07968304947203	6.21771837229904	9.65467278266554	11.3659048454727	3.19331390040523	16.5079301590305	4.05688881260828	2.05794734983182	19.3542298874385	12.2588711822409	17.6437075221682	25.2867664034289	3.13563170081039	24.6539912715536	45.9164295215122	3.23329844031498	8.20039566495408	6.14440486827411	4.81186867656574	2.21399430267503	2.02566537842065	9.39156712444798
ENSG00000004848.8	2.01512764224025	3.03504006582403	0	1.00062488502041	0	0	0	0	2.01255482026859	1.00153569982922	0	0	3.03451020546413	7.22420205004077	9.03900869006269	0	0	0	0	2.00872336750483	1.01510088578502	1.00129966920952	8.12318545931095	1.00559761559373	0	1.00749578438703	7.03770766766067	5.01510958725345	4.01567294993657	1	0	4.07597942564862	3.00852870064971	1.00385109165851	2.0025120823965	2.00949580121824	0	3	0	5.02257375577966	7.04428558949074	25.9265056307806	14.187683298481	2	0	3	0	0	0
ENSG00000004864.13	121	81	143	135	195	214	118	140	169	76	165	45	73	55	111	34	159	86	210	88	102	198	167	117	77	97	249	310	159	196	228	84	237	140	134	214	133	248	243	191	256	228	38	149	327	108	111	110	111
ENSG00000004866.20	94.6010291484016	50.7993669122461	69.2774178892169	81.8300414923065	101.12608228212	91.086533697408	77.844757861054	94.4323783410169	80.3423069767673	46.3919569511897	85.7280550647013	59	62	34	86.9184628439033	63.3528452524126	97	67.7295949910106	114.783185974193	81.9855049482404	92.8850138992606	72.7419551548331	104	107.673583835269	53.0464942502139	54.6659099037398	155	96.2794836985696	112.355176828873	75.6173773362423	133.838973135403	80.5416544735678	138.860207462822	175	81.9468577114125	81.8328102751026	107.702582635567	166.919642548492	109.783992535068	142.382432158122	133	145.675390002576	68.8948866517511	81.515233255744	171.53988865479	47.0236220510869	50	58	69.102368633557
ENSG00000004897.12	527.604549368634	303.632894340172	451.751981543378	542.820866320409	700.419463128435	923.494867338043	288.809484945352	682	708.630271840605	258	562.445796535597	224.348694637072	171.865453762082	227.357612622652	463.950615571223	296.801638412345	659.816821552815	464.929069877823	744.462349615659	365.005657069028	511.153325377168	608.818001929674	795.800267436002	575.725041022664	277.322364664161	395	909.917451412976	1127.15439581123	781.938076646225	644	1047.5435508914	345.808896424924	1160.29623181767	971.780455077138	527.820675812446	904.309392747089	616	1128.57670786181	1134.59048414443	453.714712270575	1254.23290672382	1227.5582414182	204.982657512613	516.528226300685	919.898443232543	316.565624116371	456.83528263123	278.574139743252	442
ENSG00000004939.15	5484.08850486509	5669.18752010356	11010.4054980182	3508.34870972924	10104.2356156751	2223.67063490919	7123.2231357502	9144.47498616548	8206.00769840527	12687.3717951271	5553.07146315559	8381.44834357663	7688.53220392323	1700.65490240312	17607.0709002243	31131.8988992488	2191.48054225412	9281.56767278184	8635.30160094561	22025.6731713886	6432.45814488625	6777.58882503398	8208.70295077273	14864.9410432651	7123.81445655664	11073.8066673181	7201.95636546469	8637.00182828427	6624.00440646267	4468.385443648	8532.58197158003	11190.5345679826	2302.76432121453	5667.24320031695	10480.3660945226	15048.5353837179	28318.6829221038	4192.74600770331	5694.65651135896	7969.88160358518	1842.66013581675	5428.06807345912	12933.6676160176	7852.10006767242	4834.00606100137	3753.07456113682	5371.62118182186	2652.62534525428	4853.14559778082
ENSG00000004948.15	0	1	0	0	0	0	0	0	0	0	1	0	2	1	1	0	0	1	0	0	0	0	2	0	1	0	0	1	0	0	0	1	1	0	0	0	4	0	0	0	4	5	2	0	0	0	0	0	0
ENSG00000004961.15	320	164	217	272	465	438	220	226	378	134	318	117	209	86	236	157	388	228	410	155	239	356	321	275	161	245	473	495	290	330	539	181	491	419	219	415	312	524	474	387	470	423	99	255	507	248	181	186	253
ENSG00000004975.12	397.011361295044	230	356.002034184954	405	366.002447218816	662.607003759701	364	433.021573997577	513.966143258789	225.00203541497	384	209.380856307483	215.131322747783	129.433416791607	470.445277432753	166	457.005217152529	351.010309394293	348.00124357411	341	293	540.006090781317	548.614724128771	486	258.506338184624	271.548011072852	792	717	567	450.009972624415	757	259.627236836405	893	557	425	641.918695520628	486.006736184766	726.023786717735	614.506939519173	609.708632558804	909.340849412978	640.126585608529	142	535.384499444647	993.006507276602	403	284	247.002612281775	406
ENSG00000005001.10	4	2	1	3	3	10	0	8	0	0	0	3	1	2	7	1	2	6	6	9	0	1	20	9	1	0	3	11	3	4	4	2	18	3	0	19	2	0	10	2	18	3	0	16	1	5	0	0	1
ENSG00000005007.12	4106	2542	3187	4636	4183	5065	3138	4065	6512	2436	7225	1131	2633	3281	3730	1811	4558	3003	3334	3462	3542	3645	4809	4152	2409	2526	6671	5548	4122	4725	7307	3307	6646	3160	3667	5212	3574	7244	3883	5543	6968	6492	1154	4891	7120	4295	2610	2559	2876
ENSG00000005020.13	2867.47546911388	1442.83461298172	3073.90116363419	4423.92120520565	3436.80355934924	6589.66896915731	2146.77995482749	3265.75498743311	4674.47640841066	1830.15565583865	3296.2542721274	558.358410769204	1034.12864701594	2090.51713772857	2632.80673991898	1038.96535808617	4100.18746602165	1663.01508765799	3415.88958145147	1843.67614877378	5260.94141216847	2908.40434755405	3028.16396208085	2155.86929734425	1790.48022932937	2568.89508570867	6404.6321133343	6046.79670128979	3466.63825453018	3892.83090059901	5210.59225434282	1636.34889105459	5837.91897891858	2050.8550981562	3207.4260641453	5302.81308213909	2046.09532543691	4300.22189760106	2794.05313530288	2250.94380983325	6565.31086402822	4214.47244009645	812.399489199629	2247.64475564897	4666.83570762401	1867.86412982533	1900.31085156391	1339.55340609954	1789.98722663245
ENSG00000005022.6	1988.9959647449	874	1280.97799205169	1876	2311.99265592497	2200.98262376564	1523.96343572663	1525.9824987129	2451.98512095998	951	1956.98702778201	851	1606	531	2292.97471386792	1099	2129.95775016373	1311	2481.99101925682	1194.98350974004	1440.99576531524	2596.99118427885	2151	2142	1107.98350993299	1374.99919302355	3058.9951871383	3391.87328685803	2365.99686876754	2308.93409727237	3452.99131275155	1330	3420.93943927513	3130.99205732893	1910.96593789151	3199.99328840713	2020.97304090448	4351.98525676646	4046.97270278248	3602.97750433918	3190.98651854735	3461.99967343051	889	2023.98483014099	3954	1869	1497.99475691953	1656	1595.94456800413
ENSG00000005059.16	844	324	579	680	736	963	488	727	970	222	647	267	333	126	824	291	1079	631	1005	414	628	942	835	659	399	492	1198	1573	1066	712	1242	342	1630	1411	792	1190	723	1662	1924	864	1461	1244	296	673	1451	414	649	580	702
ENSG00000005073.5	0	0	0	0	0	0	0	0	0	0	0	0	0	2.71618780658725	0	0	0	0	0	0	0	0	0	0	0	0	0	0	0	0	0	1	0	0	0	0	0	0	0	0	0	5	0	0	0	0	0	0	0
ENSG00000005075.15	595.285399816618	344.456464209797	436.331326494744	453.53303796985	753.595461627862	500.423333556698	498.287726881422	400.378220864048	740.820422936842	255.367044818033	575.023508228555	266.372266911521	540.128556240584	361.408797848544	746.687016740447	404.812719124486	682.523079683262	414.443213975938	596.562093176842	355.086693922378	488.927884466018	710.616564542021	520.020852082694	452.77877975741	364.317230122668	366.451268128802	798.103862607024	724.526756307905	693.473614345391	504.658038689536	812.788459318312	417.698390339016	691.539911106922	523.457995315163	525.288435566509	701.223899869406	578.862925937659	1190.41150736597	756.852177580265	742.210400543606	758.986478168246	769.790539569138	315.739031416884	454.727590089691	675.96718255354	463.146586183644	266.443040301508	307.229037597882	339.032901127013
ENSG00000005100.13	205.641395911814	110.308839088468	186.537302433036	185.566245749696	265.367057622625	320.637380011588	176.850328055414	308.378657109829	303.463766388027	122.905265578074	232.22101915739	93.7927827676423	106.126702882999	85.9604112691164	251.242653159268	76.0796293770573	316.832889487832	185.329768236851	304.09418019038	131.534787674273	195.161603477372	277.220505009336	307.380995445984	266.663147852599	125.78136745641	177.237844376531	435.351830468777	448.876201649384	325.941597262165	291.083298024939	498.635867450938	134.653192274858	596.709827570244	326.655609930296	215.255355497032	376.740496535222	265.151345911823	395.759125443373	518.38742427801	263.351632891683	529.236139775387	540.35323273553	107.240757285513	277.223474595866	496.65953716033	152.670763058679	188.440989381698	153.610945834412	196.130637951128
ENSG00000005102.13	48	62	30	53	50	21	33	32	53	10	23	15	26	12	64	14	43	31	32	26	15	23	55	35	30	22	81	77	24	21	43	13	63	59	37	84	45	54	101	45	54	88	12	28	102	17	39	69	29
ENSG00000005108.16	1	4	10.3380795584345	4.13117279433009	2	16	0	2	1	0	11	0	2.00062549500628	13.7282583263249	1	0	2	0	5	6	4	1	6	1.00013594000496	4	2	12	12	3	12	18	3	2	0	9	3	0	12.4085089589776	0	0	7	28.5945405818404	0	11	2	0	3	0	0
ENSG00000005156.12	448.357377454338	342.956119732159	507.383005781412	434.799338459667	420.987387924245	701.038263693488	316.955410191264	560.162698795404	659.381501266665	204.824125053874	523.965745616026	216.590992986264	283.776820593379	215.64414802913	514.079177346976	217.689592456121	594.997936691781	345.169146892016	557.601244516308	307.902562578168	388.064246149188	505.292208962563	599.176190620194	555.174697379822	277.022963910948	286.464060193885	821.067848918793	963.644356643452	706.409175452925	526.20744240891	843.065831296242	311.412757193511	950.969249041114	614.366985652685	414.025087053026	772.169379456303	535.304103789042	923.920519730712	814.1229417007	532.565195949541	1094.2103642615	864.74399396497	169.062288518241	539.13276305328	896.026669353958	426.57098313454	430.406115860619	383.749635824027	395.792216151799
ENSG00000005175.10	479.009795124549	227	400	457	456	696.014669752537	339	513	636	130	467.024577505525	136.281540770493	237	178	414.110587249678	188	657.233748732805	443	618.222610794787	275.210773820238	388.240172660908	526	456.163834108236	385.208182054428	238.362830505835	416.018599488446	900.182699244201	855	912.603582192608	529	790.026755279693	238	790.163196269247	629.035485293716	462	734.011218790177	524	966	1136	506	1070.1770765109	802.223894870586	201	352	772.141349249987	257	395	231	395
ENSG00000005187.12	190.212355800874	69.4285572807356	88.3827984271555	84.6873475231376	145.582567165153	119.06710288268	70.0746409524242	77.1719536394534	155.491524848836	33.9263821699504	89.0608731401644	23.7964010428847	50.4507172904668	38.4020176122829	80.9758104563836	64.5815055506176	124.614039926214	132.803226827856	98.1287387868642	42.4719114597327	95.5881209627436	285.442577465627	141.032328552762	59.5156934005056	60.5282928355534	55.2869760330335	195.252052817067	176.238000637423	248.272029883776	121.645935637992	98.7179593324115	38.9093856917834	162.928229348862	124.539814402535	82.8477533702533	223.003717985135	97.6987049764016	209.429877992407	254.408800008155	100.593510678494	151.570142640996	173.020403957955	35.3175094243865	160.847011456023	145.762563305425	48.764353166552	74.2997942717156	62.396367897914	79.4545779005655
ENSG00000005189.19	13	13	25	24	18.0227666383047	23	22	10	28	4	16.0107503698745	9	8	8	14	7	30	22	22	12	11	13.1265517070182	17.473894931988	14	1	10.0480826435546	13	19	15	17	28.3571110982381	18	27.7084651273854	14.4486976788362	17	31.2967058034497	9	30.7015824058499	14	15	39	41.490660095076	8	25	27	10	7	5	31
ENSG00000005194.15	486	243.960552891535	330	390	504	640	370	428	616.98799583232	185	480.992441458284	186	321.871414191903	133.964837021811	542	230	480	357	480	259	357	564	587	505	244	281	757	800	529	485	954	292	812	610	474	798	490	829	804.988386158299	656	806	765.797391568934	179	413	832	430	308	310	379
ENSG00000005206.17	889.60377065833	605	620.122225756754	729	875.335622080825	1168.57426244253	769.419859298921	862.074299906095	1368.76459495548	406	857.312624852162	464.831995712153	534.078422298109	329.934117596852	1038.97084155256	338.854134015214	1211.37963800787	611.205406474601	705.131326184307	617.764700362696	540.656708335728	895.728475273513	1129.53438305538	1050.17701929465	526.073953215512	642.451417345405	1991.30900710233	1424.01332483456	1519.45976781975	1164.61919583163	1331.41223558601	601.346979066841	2111.46910510435	1041.41790618529	895.139032841132	1116.21013410615	894.020135457164	1449.38513907765	1414.3395557595	1216.12600540997	1928.79987116882	1618.77304992708	343.90445593579	1241.80211797116	1631.6982695131	776.405358664398	808	682.101950659876	876
ENSG00000005238.19	1974	1047	1723	1777	2342	2385.99260763981	1649	1242	2916.99824138967	1257.99555225798	2573	714	1498	1600	1809	1597	2235	1422	1769	1677	1984	1623	1717.9921750088	1454	1114	1504	2957.99469650565	2419	1909.99215060159	2155.9858618563	2239	1429	2469	1069	1510	2079	1884.99339673608	3086	1673	1936	2637	2439	743	1701	2083	1326	858	952	800
ENSG00000005243.10	27	9	8	13	52	18	13	10	33	12	17	25	24	10	26	12	12	14	29	17	16	12	34	36	8	22	27	32	15	18	32	14	30	31	14	8	18	27	36	31	37	27	21	9	27	65	20	1	20
ENSG00000005249.13	569	275	529	734	1056	558	643	671	534	426	717	340	192	518	191	281	471	391	968	449	805	284	248	514	417	378	866	428	1197	674	691	581	525	699	555	430	666	458	359	260	365	518	336	612	869	295	250	129	657
ENSG00000005302.19	2749.00638913646	1067.92517669336	2250.97368520195	2375.84188468801	3003.42876494012	3386.77824742207	1523.49592020708	2351.90092424458	3602.93592295034	723.38704436561	2962.53916305951	757.364881456797	1046.68799612714	1530.43802715442	2531.36445731355	726.436691476941	3091.79836337941	1878.33351378373	2426.9233308574	1202.47896646803	2148.20557004168	2227.14618610052	2261.50727752425	1938.77874798638	1070.04073474544	1557.90382970989	4947.60642897977	4596.96535706015	2552.27235932102	2309.95947471022	3319.91604148999	861.921583721743	4042.28517684566	2563.7166428446	2001.85656281763	4100.83328526632	1724.44688759528	4365.2457862599	4032.17493523001	1879.54707506936	3992.41692982225	3484.0026987958	535.977307178739	1738.6452176561	2943.95153511244	1195.4617618521	1555.88985918237	989.591099349559	1646
ENSG00000005339.14	2573.04093097646	2524.46774012392	3068.01535826763	4327.77136433388	3146.54127319432	5542.2203550858	2224.92614637357	4116.47480224481	4456.75988707346	2212.75518947659	5582.71778706146	781.049026082374	1392.66912519791	2235.09111208126	2661.43527553539	1225.45105170967	3890.38627498578	2510.03564356381	2570.24670731102	3078.70885574162	3574.70743438372	3075.08287799874	4519.02444320344	3783.10275431899	1766.99935580215	2013.66505583442	5526.64494697257	4791.94637545326	3466.48971198573	3810.31139204564	6385.8392822571	2519.27137815815	6602.35652156564	2259.66461687889	2508.91545840376	4333.11623676803	2664.60156919364	5388.06476249654	2622.65826047742	3356.92718388939	7456.47376817647	5878.5464312378	636.729797842166	4461.17242159434	5934.99665438064	2445.93989500791	2231.87462430202	1761.02291308242	2878.79125294271
ENSG00000005379.17	516.294364409012	491.00765467896	358.312899681154	375.235104879911	601.612121923813	678.33607434089	507.419796979421	518.239195407055	1244.64473163643	348.253698658934	456.825766394861	442.565792090716	252.084281028584	122.869033534798	524.638659334931	200.283642551662	967.041892035358	317.212297690384	567.035724714453	483.951555318048	242.419603200315	301.40990110608	644.406531797507	938.746755349972	219.80661423559	603.465383788978	810.45355708569	888.554901544959	618.578499980723	1091.29747260019	712.019803986801	642.354274357405	1832.50714583835	1002.18560010457	431.01257496251	906.032968275227	583.78486460446	1116.4647578992	1103.06483092527	416.162969816404	915.022081896823	1240.31148346024	198.914212132377	906.985939839545	789.635939068905	202.261566144173	317.905669157968	178.237994346362	417.388932337759
ENSG00000005381.8	98	329	370	100	129	77	119	69	523	131	270	27	83	8	78	85	86	63	180	67	113	687	215	114	84	95	81	183	147	137	323.960570273213	317	199	102	164	79	110	338	152	130	92	370	48	93	127	384	236	33	68
ENSG00000005421.9	2.00202235499383	0	0	1.00130158053818	1.00120778754422	3.00140748116659	0	0	2.00064292106925	1	1.00129090752246	1	0	2.02476649012244	1	1.01432886271336	0	1.00110646464888	1.00097979950177	1.00020853585112	1.0009000762145	1	5	1.00043015370264	1.00056741028415	0	1.00416907116698	0	0	0	0	2.01898496105244	2.00285889847787	0	0	4	2	0	0	1.00196419072997	3.00041672507883	16.0705363599454	0	2.00261583200714	4.00380953205181	0	0	0	5.00182043184755
ENSG00000005436.14	176.326350341036	96.2261402753209	85.8869073248658	134.446398072051	167.046498334434	255.494069397172	85.3651686689326	181.895140040616	198.907169146162	43.6036684569168	116.153538868759	99.8182001837942	58.8746312279967	23.6621148353104	211.349897375506	57.0658522610649	251.014604870482	143.877658084919	275.883082270644	89.4953444473166	124.086056437786	219.455089288095	191.098101137692	165.559016003056	104.555471262619	143.32119741743	321.969009932012	308.761822989936	236.71168306478	154.555198192164	313.791540096887	90.8525453753931	411.316531649706	312.042575738397	141.084773701874	345.843386200803	207.62154079614	315.825843268089	463.83861187328	172.591509897606	411.762751848691	306.033614003965	76.7589258010662	156.52948838179	310.033830921357	101.486705119067	141	82	167.976600891804
ENSG00000005448.16	140.116765647111	84.0977918647055	78.0662920526426	150.749634345703	162.137970601811	210.768838524775	119.993820780933	149.961634312533	140.941805486703	93.0032630223247	127.648595962873	97.0741445630874	147.8665167217	39.2438276822272	221.29813384115	111.450302069411	188.301803959812	137.280400143579	99.577385401666	130.957072796081	119.383068005036	151.445067030815	185.603747311142	240.015378586065	119.314625011251	128.515023430315	297.462347413828	287.303108958778	186.574923395528	176.969851579039	270.734425153679	106.021294458477	340.684669397853	297.150753770802	121.192385660254	296.82359595442	178.637940437897	319.421405126214	276.871077722676	318.916245116683	345.5110489938	313.24973769069	120.146871438894	220.343733389406	368.991102044902	130.047076896183	85.5566793973007	106.149923863732	173
ENSG00000005469.11	113	90	87	139	136	186	89	185	171	58	112	73	56	24	163	63	201.727413159872	125	193	135	106	125	199	191	70	143	279	315	178	169	273	85	360	273	126	300	208.868952512332	244	360	166	320	244	77	192	285	92	86	61	162
ENSG00000005471.17	30.6246965837268	24.9887880803073	10.5363668095094	43	20.2307538970306	51.3759280475566	32.5566347899614	44.1356025039258	36.622852193647	9	19.5773197969719	17.0984847656612	26.1286651257986	6.1634797284055	29.3796328658151	10.3404069016486	47.7946757240684	50.0275511309022	35.9294568127437	46.2400267373524	17.449129824417	97.5845314356361	59.9831403968484	40.5126849503925	23.5191132519758	44.0424861212201	100.56706839971	39.5641168311642	123.556722192912	75.8142598242568	87.3149013171487	31.7766797115574	168.444504752767	72.6590224007912	12.0799897327005	42.5091410936544	18.1534160193424	29.5516457914508	81.5386118536629	93.0339014448827	113.729514546731	79.625381259145	18.1060454915378	66.6958154862276	107.791813175469	21.2131718131079	65	13	23.4746430590462
ENSG00000005483.21	2421.30288927497	1789.67403913049	2254.90126640344	2931.17270542589	2845.44032317517	4756.30562741138	1757.46087239321	2974.8815431953	3641.00566148464	1506.92122941682	3582.29502972515	738.117205348426	1226.46562779759	1315.39387000392	2253.03933673924	1038.03272351949	3315.76550757219	2261.05980406172	2626.96729458889	2312.98561735451	2458.12673215602	2710.17027844575	3297.04291270602	2943.78794606633	1463.52733099741	1736.20056672573	4699.57169490362	4570.96970638872	3562.04258691782	3401.58779355055	5212.08687069289	1845.60262531087	5701.14423565873	2852.0401111277	1861.36852473139	4163.1974084101	2357.00874004959	4531.26976957007	3274.35645210367	2848	6174.63420823131	4303.92122140728	834	3021.56188953293	5414.50067357155	1944.30558880362	2094	1504	2437
ENSG00000005486.17	817	542	750.606897926511	872	987	1249	767	727	1087	489	1197	325	806	506	1051	426	912	658	685	649	742	678	876	825	499	525	1389	1412	908	943	1267	654	1293	809	770	1159	772	1556	967	1365	1602	1033	407	890	1329	793	489	586	575
ENSG00000005513.10	55	16	50	41	34	110	26	44	25	14	21	9	21	12	36	16	50	31	41	22	35	39	56	53	34	9	80	71	90	32	61	23	93	30	62	57	33	41	55	101	139	36	4	32	86	37	46	47	65
ENSG00000005700.15	321.580906053129	199.158823552502	272.209021480732	369.751035053737	348.758789795424	610.43392949446	186.181614438002	513.457318939972	459.137715348269	135.699711716748	350.734930807603	184.071295017831	129.862173803671	70.1285938964219	308.978458664651	129.83199182449	504.920870671408	332.669110354226	622.942494664681	233.236253224021	317.433524550494	422.499536859442	524.678658481485	396.804276628679	162.011481165612	262.385288701761	651.285301716943	847.126138635263	528.74841878283	501.211215371756	839.853451258798	187.13529828862	1063.15175551882	912.843613521504	314.714480835239	705.767443352998	414.941140245821	682.504905848878	829.367519871508	309.961858306863	865.344725178362	756.283793612487	152.53091046506	404.225317036271	762.954996498494	194.479108972044	324.870966012374	184.532705748039	346.092710008303
ENSG00000005801.18	228.559738641238	110.60748660873	164.99300937426	157.338350506921	231.063497271908	386.019451974219	133.592919128178	243.255354872669	289.029050037814	77.4985276247301	169.664664512364	90.8923430376003	123.183984194561	110.418025665425	251.629112288839	74.603228971478	377.841812858908	149.441029025389	368.087801346152	183.871060617814	140.429175369338	296.098723938941	309.025443886513	228.834857362689	83.2578401673923	208.44207309839	384.629263410168	556.007957110437	425.409726836043	249.618964463439	353.868679386414	122.357943478538	501.902332206622	378.818718719021	164.930150428147	428.522705832411	286.84273099378	427.02460275994	660.182891188051	185.094520537827	556.399267350114	491.944070129105	138.624015541172	274.184176494309	270.673970612191	109.213477542222	245.246829481767	79.3172410047585	191.353129806156
ENSG00000005810.18	1054.89030402414	925.228989898283	1155.57281759126	1643.78387934108	1290.0985183852	2484.90794822537	749.949651601784	2442.38925828313	1649.58377187099	802.242851526176	1463.16782129	485.925546843654	609.081199246431	465.732749793962	1290.40392391428	512.165143997362	1604.86211362336	1250.40656182206	1475.63978771844	1142.96526107634	1158.38806467234	1625.11616168972	2396.40655079207	2159.19638341666	710.66575146565	868.49996313896	2486.95417297966	3020.05623431964	2314.42613718482	1852.6651839606	3386.77687123154	951.695522580919	3868.5323017236	1885.15031447921	1001.49673438163	2204.73367432037	1580.66278092375	2194.1393512591	2147.43128270467	1715.42299497025	3961.26482530453	3001.32944777755	645.353129794454	2382.39639159597	3740.53136074883	921.095224153091	1486.40992606447	875.78911243025	1937.80313527423
ENSG00000005812.11	1066.06117926761	613.502249915702	1076.57899311177	1312.30274454076	1174.42061895088	2410.55335749704	715.659849311149	1306.45750024037	1837.68106334874	515.23111667936	1603.497833621	275.163778147824	300.610517519559	475.259088340442	829.888731527539	376.52714581754	1828.81423651586	1269.28315064193	1800.42875979093	844.7293859869	1515.36951980454	1312.95372555403	1648.47971234582	961.334007397234	576.955241133908	886.468220605457	2383.05084891565	2755.95479630726	1548.70028746167	1620.26971016671	2375.75851779763	594.811247782932	2650.46370126515	1363.31674433821	1253.58635030918	1925.96012295621	1197.99526484048	2224.51737002072	2044.81763485631	820.750031499349	3363.34702752213	2081.16321237821	371.560303048902	1009.92449062617	1820.94151179021	629.716916317201	1061.57099521104	481.799347350222	1066.81801771447
ENSG00000005844.18	6900.71518368091	4392.85660768604	5243.21655222556	7271.02950733005	7635.45356466208	9311.97236609868	5614.83087450058	7658.37187308746	9225.49453186131	4148.69795867251	8445.75153225294	3805.24404542149	6097.69896992088	3219.67789337685	8179.11456109436	3467.60411073892	7748.13061262828	5383.56333451424	6461.62765160532	7041.7864029533	4966.25784702313	7220.40831207899	8901.40663657123	9858.45113297383	3373.9720004866	5883.61474505371	10151.041678926	11802.7270961745	7305.81593841987	7127.86930093329	15104.0516920561	5664.33641536257	13272.7348542716	8793.9631952079	5037.33769789972	9897.94836922704	8966.14012537666	12482.7170209611	10917.7540429347	12933.9709193477	11158.0674136135	12738.1791895128	3284.69205884288	9468.24631690763	14061.4245655802	6392.13007464561	4678.70012666382	5605.4317120765	6027.60391455269
ENSG00000005882.12	250.001203602292	156	237.166375487151	336.023171554339	307.629647838425	540.874937374257	281.490743289333	351.386991329291	434.375609475082	187.35269968678	265.947903510363	209.505751595958	236.931938275438	119.047815812433	355.242490846144	219.686217150313	385	220.409798009505	343.280950280484	187	249.294627737783	402.625078663538	439.679267215076	453.142189060228	218.889674471515	191	456.428305900993	502.298744797419	347.016089835544	351.637248889498	483.478978992383	338.305287192954	640.329767666874	500	241.217056741942	427.794572372287	387.277547127994	514.000071493174	446.456041557712	478.501327902155	508.068164795531	600.193144203072	170.693389418964	379.281072125113	655.183689071331	341	212.000890091456	256	318
ENSG00000005884.18	106.316703638177	64.6725629207679	68.6324149991314	79.8836880911585	96.1562521126964	101.701852852808	45.8671897523647	99.2003681465399	74.2486630972337	35.1456549399203	38.6404571165878	40.1887099334679	83.77678516337	42.8716789597461	133.227655109856	36.3208637429913	86.8127642240952	74.277594211333	70.4682707373235	77.1615366924739	54.5753259858427	75.0437426417925	145.472542221746	105.137349143089	35.9152661292221	50.3723177227568	137.716278830787	169.751265717611	97.7988721975742	91.5911121081199	150.043838345865	75.2836522148288	159.922262292385	72.0497261378365	61.2982346673374	176.415653502959	91.6028847334575	90.9052654570104	148.444154334902	125.392011101436	200.030220163366	300.851672572204	69.9523815484011	121.214610941874	200.331625976153	66.5572072582011	60.0810241101897	99.0326499743361	83.4100567549139
ENSG00000005889.15	690.733443536467	277.966905551245	444.500678202253	606.801658915812	758.074844443482	879.049151716106	303.347986428511	629.338766690179	785.114094885138	225.871147513805	727.03218550292	182.43176932985	143.077947532655	266.504448319249	615.122223771039	160.289929584821	1086.63874473863	767.122190558055	659.946046061911	541.405622038913	528.382986320121	536.612051292642	697.591748000982	761.293556100807	284.303566760482	450.782169978466	1023.49943601133	1604.87586290859	666.250221621414	728.494487136544	937.965302777044	309.350569574819	1220.81433928939	696.228602711962	486.639505765787	1271.21930999842	564.055821512838	963.133679577409	1290.43284273514	377.823895043214	1402.51593387809	913.957466974827	148.525354308802	515.256970535425	945.446829358182	231.628153418548	476.333772195481	289.309229795172	474.765404870574
ENSG00000005893.15	4774.23444910857	2619.99414862819	4066.40315249128	5792.86145169058	6072.96438572728	9220.89180327725	3376.03841648299	5111.94696554358	6875.8037942776	2537.81701897336	7986.33949085031	935.811533813997	2781.85084094546	3219.33155467969	4218.70521206023	1875.66965401329	7033.45578069869	3551.42742655037	5409.06583157906	3739.6722493573	5818.63290992929	4681.03857339398	4924.1684781878	3485.28111202451	2976.13405771501	3520.00243777074	8921.90999626699	8041.57576804557	5197.484548864	6282.21743373309	8533.71119918605	3071.86769025838	7202.00068515956	2778.63827832486	4244.30639065392	6821.9207759713	3268.43555714216	8775.71806604013	4410.45189411954	5006.56107128894	8683.41579866928	6215.19156768154	1072.476122936	3691.09462557909	6419.22185796548	3733.53905996086	2799.62522583918	2101.6362892277	3144.77141927105
ENSG00000005961.19	550	537	958.050175762424	788.028606717726	736.00041568645	553.055323574294	2248.03978438107	784.501189673444	512.044141555692	1690.03611869587	1125.0683682422	792.42723160191	1733.50708924557	1994	822.058989884434	754.029387069094	145.021155661814	246	806.065861003862	523.033021375753	996.046968872838	281	192	1167.27182217421	504.009107516544	236.021675502801	1114.13386956226	277.039835324245	3696.18795294014	597.023264811273	1215.06964216536	1761.25219812003	369.003203846514	800.144244079023	642	347.211506989772	750	340.351058919057	106.102104638303	1039	281.078866890151	619.508952857353	1223.34899426925	1072.7222759323	959.109868745173	992.046802093563	310.617207929506	232.229510497564	488.000284803438
ENSG00000005981.13	6.43100619139014	11.0772551370659	3.51538563586134	9.63222909875079	11.2947160615051	24.8422693004143	3.06119946963944	5.8210251685441	5.98531812327723	11.7928241107286	8.31027866060898	4.39366768046509	9.93350891462452	15.830425395778	12.237932813669	5.28037121241586	8.06582545691394	10.6087264277117	8.13110136154429	4.79442416262418	8.83462672955186	9.95266098610403	16.1317777039034	10.8967132302743	8.56302433296238	6.18660113462171	22.6513516693783	10.9924244944015	8.66382998463382	13.0939633043137	10.7568822203464	13.4465488947127	15.9400148331674	21.4564570215003	9.09754903310769	17.8874860698367	8.56060347267144	19.1301127532623	21.2942233980555	14	33.2102868434832	68.7754091590562	3.15364334437278	15.31319479723	9.01705491369178	0	0	7.28058602848935	8.50597993424246
ENSG00000006007.12	1858.44478228285	1042.81052674397	1278.29853483683	1711.55776970384	2268.33081303575	1923.62137453662	1368.70130649879	1323.08612821414	2132.63579604938	1102.5844364099	2194.73158383287	737.191325806552	1240.65554641954	1204.42113062912	1602.75295010827	1396	1912.33044860128	1318.12014161537	1753.96603183877	1194.38941902756	1967.36501028553	1653.52367890926	1568.83513821264	1461.72548245351	969.693442853478	1072.09455582352	1906.80431248077	2453.44633977476	1820.77348793864	1879.74299813232	2636.39359817309	1225.07078103551	2060.1233361301	1548.50902156481	1272.9810229625	1979.05276162138	1656.20351518719	3363.39388324017	1840.18944603613	1761.79923848885	1851.37665298346	2115.7834599286	1006.67872875505	1295.87247919187	2081.86950002961	1323.73657373785	837.373114869697	820.461691616308	885.173612003135
ENSG00000006015.17	775.530764059858	245.373038557236	399.692264443124	495.810790073229	772.653218424944	857.933452903235	435.440830323644	515.499065412633	858.74464746431	275.189410045305	672.178611902388	331.683011350169	720.511255289885	307.988290496842	1006.07391704686	320.03917588366	822.773124390408	478.08452173748	616.230227493608	423.675485225335	404.297461491064	733.269628308098	751.323822381584	571.598364659454	401.63710596909	510.7051483858	1093.49465664225	1049.64749343074	832.842608853646	723.873799489158	998.157426129663	476.87595828459	1238.1451014468	946.426605145958	745.257951634451	939.702139648824	706.76484326036	1390.38550634161	1415.97541768683	1231.12219095786	1091.33215936335	1297.35727860448	435.035898280678	835.784721948446	1021.10696813184	658.653542530024	434.361533894562	570.092999296748	463.97142784459
ENSG00000006016.11	42.3120685110796	7.39658718356023	23.5397834090548	37.0055849739059	37.9788539479875	26.4791036814302	26.1640339181338	22.2639420561683	62.6022537613971	20.9237727649704	37.422624637433	17.2987345646401	16.5832350655193	15.7413715722043	46.9696648857637	32.8303169786968	30.5372010825344	20.5894964654794	35.0165868650609	23.1637232053179	22.6586284973559	37.424229518262	39.7327547465096	37.529407913352	23.2257738773672	54.0114645388873	78.2921641396845	45.5148281814181	43.6525042797092	41.6380840412949	42.5169956597463	29.013207976705	55.3823715717577	37.135989143436	33.8733120427632	38.5846732821675	49.8927308225902	76.719375358552	55.5161185416845	16.6552553508987	85.6469602379862	25.9819116828039	18.3490572630377	57.6179095650502	41.9698623454445	44.1651718708017	17.4758599688012	19.6947071570962	36.1916540318115
ENSG00000006025.12	376	217	258	349	443	457	289	395	458	244	347	268	262	117	566	208	442	291	325	356	203	351	478	586	179	244	584	628	499	433	636	252	895	583	320	645	472	786	732	631	709	697	223	699	827	310	251	194	327
ENSG00000006042.12	4.06508541531186	3.0148564635339	3.24589788517646	0	5.02081582496129	4.38891461664922	5.11044019730033	10.637984424577	3.27528936359691	9.08138394741537	2.08388252537934	4	10.3167769180902	14.8535036644741	8.50835889741187	9.02142504825963	11.8318279192922	6.00395347721917	3.15357937472344	2.06152750859989	4.09022266136316	3.00481924901442	18.9681841609469	2.13256160179187	6.88571411421655	13	6.64171638396059	16.7132756910993	5.13403280335309	0	9.22287052494281	7.85077096889332	14.7805840244127	9	1.06430503696549	5.32509125731822	6.11438880843429	2.01763566938008	11.4737206995318	5.38572021910689	6.36622558705503	42.2508929328686	8.09280618557281	8.32449628857738	7.48550631165233	0	1	0	13
ENSG00000006047.13	12	3	5	5	7	1	3	2	16	0	6	2	2	2	2	0	4	2	5	2	5	3	15	5	2	1	4	7	4	0	2	4	8	0	1	6	5	3	9	10	7	14	0	6	4	0	3	2	8
ENSG00000006059.4	0	1	0	0	0	0	0	0	0	0	0	0	0	0	0	0	0	0	0	0	0	0	3	0	0	0	0	0	0	0	0	0	0	0	0	0	0	0	0	0	0	0	0	0	0	0	0	0	0
ENSG00000006062.17	970.494267503417	671.2075956379	852.523652961653	1062.96680275326	1090.78789943563	1418.51156130879	874.83145946885	932.583388483202	1428.18396907144	597.541813486405	1291.96360237644	464.866304990941	695.580489450662	414.04221416861	1152.95455927301	462.64971970875	1217.17150011552	754.302668544176	881.732032733393	896.688826656365	790.667596574798	1058.95366369249	1427.35065446897	1320.74450936944	761.194205177892	641.795605322674	1902.41744635799	1949.6967068549	1366.11790646467	1239.53671138494	1987.341908155	782.906114143402	2541.99348376734	1223.48983707902	922.176043876774	1547.80668872519	1097.64425630697	2097.58065238418	1671.69860464518	1793.62488761719	2364.41745187199	1703.40796834797	430.13033628121	1391.98357090641	2334.31996006229	939.140855349401	884.168314791343	823.989003013208	887.923840595944
ENSG00000006071.14	0	4	1.01168596531529	1.00442903749162	4.03193306568203	1	1	3.00030304358887	1.01210494707782	1.04244375317395	1.01029104292514	3.01445379444909	3	13.2323646204322	1	3.00185117106303	0	0	3.02284428147803	2.00178432764688	3.00987099454831	0	10.011027584441	1.00225180017558	4.02070256212393	3.0289617762663	3.01545815762734	2	3.37244229593901	2	2.00593557033841	4.0078767609168	2	1.00949560165764	0	4.000539924985	0	9.0162350670111	0	2.00014888384938	4.63333195795901	43.2473898523727	3.00218857112974	0	1.00351389643181	0	0	0	8
ENSG00000006116.3	1.04201357611947	1.01985039121523	0	0	1.01494282410282	5.03715171710547	0	1	0	0	0	0	0	0	0	1	0	4	1.008845507313	0	0	0	1	1	0	0	3	1	4	1	0	3.0378617454634	1.00517197694839	0	0	0	0	2.01653308070415	0	2	1.01144977029486	6.0571184598854	0	0	1	0	0	0	0
ENSG00000006118.14	7.01206250531474	7.07683495336593	8.60042475957416	3.00513243159838	21.0787647255415	22.1933708628423	6.05728744354664	10.0619402579652	11.3499233568743	10.3037309410649	6.09016181529064	5.00890385298198	6.39551907284598	20.1128659021443	19.1219135865895	3.0331645947248	15.0802546258189	12.0511940122594	14.3833405984354	4.00334684630343	6.03970605866108	106.853112738305	11.0715571766561	12.6164653284819	2.35144905455691	8	18.3916200862369	13.0802116530658	26.1848543668814	6.02488594003889	9.05348590438902	11.473560579807	14.0370504078792	15.2039967610281	7.09908483083794	10.2621794424732	3.01412865218201	13.0753507440213	24.1137707634881	9.8871860508355	10.0321211432214	71.2789160571272	12.1944045428778	13.6731240559052	19.1308975777443	5.0528634551968	18.104608914588	0	0
ENSG00000006125.18	2312	1699.94815439889	2195	2508.93039779145	2587	3577	1689	2976.9574331571	3013	1402.85609878003	3082	1237	1630	1027.95578849101	2795	1914.92628277033	2712	2281	2446.948053893	2429	2152.92598721082	2893	3526.94178937478	3741	1623	1739	4090	4387	3111	2642	5121	2087	5007	3544	2132	4202	3140.95173282828	4705	3441	3615.77100571448	4842	4474.9168295256	1102	2803	5144.29571641362	2011	1687	1707	2515.98723356426
ENSG00000006128.12	0	0	0	0	0	0	0	0	0	0	0	0	0	0	0	0	0	0	0	0	0	0	0	0	0	0	0	0	0	0	0	1	0	0	0	0	0	0	0	0	0	5	0	0	0	0	0	0	0
ENSG00000006194.10	620.025661870633	378.852694287742	484.131549663741	571	582	815.000022340624	424.973312391803	527.762637362637	779.835948811872	305.458449777707	677.881855615582	276.2290167049	419.513356416482	177.531954887218	742.200506372999	252.002599547418	710.057969004876	484	694.756122239788	416.101724669764	439.457700692291	813.913619841543	820.112867933435	722.743007282618	372.216996573517	412.723271046465	998.548369388623	1062.00497794355	738.753720313576	773.767929891839	1146.77264396608	365.84213737673	1148.65828008238	849	591	1058.52233355519	637	1150.63027691746	1265.43483230753	900	1182.85849099903	1012.34937981713	267.103222504765	757.774921280561	1218.04308555315	455	369.515044633222	452.395487206699	533
ENSG00000006210.7	9.95043628920367	9.92547461841894	6.19788074577856	4.12338750847029	10.7768162670667	7.05713860852404	10.4948561529093	6.07504450656637	10.4634199235376	1.2439646172637	7.76879391287996	2.01376700769677	9.34882876810783	18.9565241716716	11.4605927289267	0	10.9296463962294	5.22175292384573	9.53215823041093	4.08925578334982	4.1527052088182	5.94319078481512	16.7716862111602	9.61475879534291	5.08225996236251	6.40645530272446	14.3766794902589	11.3544536932219	2.92586204771571	2.24398004484993	4.22218361344747	18.5047894315784	8.37142879039593	0	10.8424018840361	15.1995485953262	10.3909501851349	3.13332335351866	17.3110867415132	9.22135422377334	2.49360694114071	73.67281361674	13.4672053502138	7.12906506714804	16.36643131356	7.60456538954003	12.5152909571004	0	0
ENSG00000006282.21	461	185	74	214	546	623	363	262	557	209	484	237	80	56	365	158	142	86	500	156	164	625	327	572	61	358	511	417	449	437	707	183	958	709	190	349	332	1065	1075	196	846	716.85247611553	182	615	545	311	301	114	266
ENSG00000006283.18	1	3.04236419038942	2	3	4	4	0	0	4	1.01737116645515	1	1.0586787840702	9.05176725910728	7.04485019286359	1.01232552340929	0	3.01932822952949	2	1	1	0	1	7.08743242600861	3	1	0	2.03042007649448	1	0	4	1.02788808073096	2.11388923096634	7.08994466338382	0	0	1	1	3	2.03132929199267	7	1.00439337028044	29.4429294489453	0	6	2	1	2	0	5.78480729764933
ENSG00000006327.13	133	46	64	63	129	99	62	49	234	42	164	24	87	65	112	35	125	45	73	37	81	94	106	33	48	59	127	78	115	78	115	69	59	27	82	111	65	199	112	174	106	128	31	68	71	78	43	73	29
ENSG00000006377.11	3	17.2211114761051	12	6.32183278884364	28	11.825226514936	6.62454857048458	21	25.5169526311457	23.6379140770821	16.0030903740353	6	14.7802511876185	16.9393758077381	17.1494951511062	14	24	10	4.2200052277049	7.32730364798557	9.83515896822504	11.4830730398178	16.6078221955238	7.34969833882251	10	24.6509676431362	18.7596720594564	26.2888288333816	14.2133986432563	17	27.9384505652416	17.7825335240749	16.7259636861077	6.34190896698309	28.2095687132462	18.1348681312702	8	13.7788833301191	16.002929306906	21.9629481513023	10.6322220112667	48.6430097777388	26.1039262737562	23.086881825353	11.3476545518231	14.4606736247659	3.27271139236183	6.38625242115521	8.48322600516138
ENSG00000006432.15	90.231783422976	79.4552812043447	69.3707273382127	99.6118013750768	85.2284392459074	121.41326937834	53.0913792459964	94.207410410107	87.2979646166983	56.1118633471702	55.2045727829084	32.1251126335304	47.0179270433974	30.7538593468576	109.801078060078	27.0236826557439	113.171719911229	81.4245250954718	107.134827090082	58.0551599458566	62.0940257726728	99.1625605474268	139.681658256532	176.147818964733	65.122259135912	57.1519515990799	183.332335348238	141.397226402539	152.184930473233	119.120661996404	168.758835819833	70.2803211441135	259.250992622306	147.048475831465	70.9442225424797	138.212087853886	112.182421653922	122.179823850464	168.193155023051	96.7056175125944	281.366026610644	270.145771852826	51.1214249077181	94.0266313478545	208.183425820679	84.3940740256252	106.227222670714	50.2106592032487	80.0308664020497
ENSG00000006451.8	420	193	329	418	389	600	219	379	617	175	372	159	173	105	410	175	615	373	573	241	330	537	510	374	238	304	755	830	595	467	816	216.955060188614	830	825	414	724	507	912	984	470	970	768	149	394	892	190	363	207	378
ENSG00000006453.14	44.7803096160032	7.0821701854922	25.0377435341764	30.23862776669	59.4275200817369	85.2224638218269	28.3986065729854	42.9308265440706	79.961674824388	25.3056986133283	35.1240594513594	8.66110755140852	12.2573117491185	26.8517376616398	36.1494460063688	6.638349806453	56.9733031419047	25.2726790499217	40.9657434956286	20.634376404118	20.1513343010938	30.1646130360358	53.0004204611837	18.0873904011253	10.4993017925406	20.8017167516396	66.8681936741123	94.8725351412122	51.328295219664	47.7970138237674	42.7567865607713	14.8785908022471	76.254839493159	21.0359160675256	33.7082093234832	60.6359697790922	29.9183868438684	64.8444777188506	72.9330552607275	26.7487791302145	81.8688490853385	60.8913676619256	11.0334829620601	23.499781187822	37.071330430233	24.0213551356315	41.2972390979944	16.3263507744412	19.0279353042318
ENSG00000006459.11	1229	888	1298	1820	1508	3112	925	1610	2211	681	1659.90114114009	400	596	802	1086.81029413988	761	2240.32232815499	1165	1861	1094	1551	1580	1622	1173.64805594954	825	1261	2777	2857	1494	1824	2677	820	2875	1316	1219	2318	1217	2188	1784	1354	3535	2210	323	1285	2191	920	1086	647	1027
ENSG00000006468.14	1	0	0	1	4	4	2	5	2	2	1	4	7	10	0	3	4	1	4	0	4	3	9	7	3	1	2	3	0	8	1	10	3	2	0	4	1	13	9	2	0	32	11	3	2	0	5	4	0
ENSG00000006530.18	436.00672793991	284.841631192239	410.450971476166	408.476321287678	536.182318952817	656.928444383148	320.962347946293	531.723303905928	674.51739450838	189.281018661724	399.57969063338	217.544487264673	216.289879963749	146.421656268009	524.373656663804	175.163484409938	619.885293213543	417.991002063957	565.536744312663	317.758215634258	320.672512796215	435.440603771755	552.456165635261	658.42984162005	293.702784750769	373.173704850756	843.91387026592	899.696081156831	687.460246784026	664.993448296152	941.156841247797	268.141068796724	1010.34065619403	719.317741042997	436.488924102788	808.428158264953	532.288216572527	866.57690749184	1300.9633770177	543.551443617236	1036.78405081804	943.522771032855	218.004709303952	604.7525463897	881.207173323587	173.382569911376	339.388828689461	324.441399651779	488.703105093709
ENSG00000006534.16	1294.57298182564	909.575153815517	1063.69155902062	1392.07830791795	1961.93614065005	2013.60265755751	1210.92882138529	1031.68288312158	2120.8567249684	793.685872837456	1778.6124437024	483.637840100301	1683.160407565	638.811887037653	1461.7184429825	635.838717878131	1468.95165739127	644.058283174047	1400.79596873215	852.883326377882	1054.56691571415	1771.36499143413	1269.05892897616	1122.1306823942	747.274518047472	880.460055840282	1983.58787306605	2001.55001519183	1213.51995201092	1600.71789016764	2561.78029653634	1024.53822475789	1679.80911806959	1407.74765327576	973.485516947027	1710.33204848674	1078.58567234183	2298.88582569728	1280.17969352834	2187.24804683904	1719.08225862427	2179.04324198569	528.520802950695	1375.82736938341	1783.51177393842	1584.23507571099	594.247028278993	725.351099505373	574.595458764363
ENSG00000006555.11	229.181827116976	184.5071310291	156.299031046509	216.696291136469	236.282003839967	349.208637013933	250.890341953496	251.582119810489	402.981349780951	161.579205970581	325.278825321718	164.97244403032	152.348696935439	113.027238365253	294.010669628759	133.720934158403	394.996905153833	204.829275497877	317.356424447714	215.071375766241	153.195655523358	214.474366403702	308.938882031999	381.638078982287	128.944736605439	209.312607475274	439.885188641608	395.227483001792	291.98502265501	317.374251672416	600.799176536026	206.587757979005	526.507639449526	557.173581388079	230.42831400071	501.622648243295	416.423477618479	602.645861725326	462.668076882236	325.377833721271	476.683760428727	472.088610048884	124.30049559665	338.684895434429	449.876905107846	226.04928852136	141.933647288926	164.290315396219	340.30794510197
ENSG00000006576.16	363.024083752081	116.118529560201	229.073001559508	339.086794248804	427.504785248812	699.908757306031	122	441.072457381878	457.378991859527	112.0519984589	297.147289046348	142.017822352071	45.3782681516176	57.3819312255952	252.101774646317	71.0046331628475	587.346476518257	326.080366900807	731.403214184813	230.040885253692	323.082790493974	414.056528661577	451.081151040321	258.12734172579	137.292490129512	350.688729200956	655.31478111298	824.187325525801	783.005903506731	486.152915240734	641.232508438578	120.236028581015	995.371784795132	823.40054499189	268	641.228693451885	449.09295856962	631.165681234823	1210.27326190307	188	891.121953394902	555.00091418042	181.157523662763	419.249794752102	552.134894058992	141.963881754593	359	93	311.031468335979
ENSG00000006606.8	0	0	0	0	0	0	0	0	0	0	0	0	0	0	0	0	0	0	0	0	0	0	0	0	0	0	0	0	0	0	0	0	0	0	0	0	0	1	0	0	0	1	0	0	0	0	0	0	0
ENSG00000006607.14	219.571779890818	109.292524530625	147.16014129801	181.145975142484	249.893218668421	303.296020426968	164.924764698378	309.94841825375	282.080015907061	120.670094272124	197.402816031144	78.435451283708	94.5549174466781	87.2750297348751	211.7230385289	79.9123802161253	385.707126780445	211.891059042609	280.884922272693	169.505331364422	172.52266491383	265.080013433881	297.259860414319	271.429168428098	136.503725512132	203.808468257088	439.501503324277	452.353096305814	318.823519090574	221.439963864882	427.391738890818	158.830177572653	596.975416898999	263.435324912245	175.014147822915	353.477455458817	275.465073507707	340.053246067352	521.671772414849	320.475390834632	513.366434691179	411.028620568451	112.404123691276	278.07652897307	436.190810445139	128.73806055437	217.780054816894	170.227590230753	252.593626611562
ENSG00000006611.16	0	0	0	0	0	0	0	0	0	0	0	0	0	0	0	0	0	0	0	0	0	0	5	0	0	0	0	0	2	0	0	1	0	0	0	0	0	0	0	0	0	9	0	0	0	0	0	5	0
ENSG00000006625.18	147.827430369808	63.5839710517746	64.7814638206936	86.1599018007131	101.4149792643	127.563797014836	77.1510282796531	92.5965407450881	130.822666949084	47.8482176707339	95.2147681224464	36.6630395132459	46.0673573304157	25.8848084803862	125.707984123935	46.854752208138	120.18026843974	93.2675246660224	179.628305626361	73.3055867568414	66.7226224089688	136.517093108801	137.818084810001	109.210860274804	40.6057264382592	81.0186578413109	185.363862563794	194.828067761655	166.928338119292	113.528318498093	206.259319449352	42.6346417692175	231.256650369709	193.366335068748	83.2878260565658	230.162381200409	143.052804887064	269.068039912926	338.900196871326	129.458841043438	211.992200273074	176.891431745864	37.2846804479925	116.166934328629	207.6372670908	59.633561631064	116.904272508625	33.9562877221826	83.2451446740369
ENSG00000006634.8	156.078661526781	66.4113432866191	124.078965797815	130	113.344448963088	163.702995550273	105.020171270193	124.053079596609	159.523624416267	63.1169643729972	117.160250108559	63	46.2861629930879	40.2294346833986	147.711980044825	49.0200068907752	188.799186980918	127.681205497386	215.067509534802	101.017162361	112.003505440431	151	196.754298410303	144	67	99	211	273.109685802992	186.006193397828	130.114314593768	253.133402374862	88.2799935210276	338.237256780991	355.040040098363	146.155369910299	282.519371678886	177.118901981831	276.122114370133	341.473285678345	108.004270706549	318.21258546298	283.804005792307	55.1088125426988	132.113342424258	319.600273073993	113	120	91	122
ENSG00000006638.11	92.4863567882198	24.8483292030944	85.0567938906505	101.090488393489	78.4448517822861	80.8596844160437	114.060731316722	61.1642689528018	88.1874556874514	45.9341580201136	80.7546387544715	52.1637566713363	74.1553740648205	80.3793779617948	99.9287473440196	31.668757173083	105.993349120493	58.6062390474593	57.9580445440153	26.6961986432525	62.6400808961157	56.4163417277071	74.7743054728381	76.9230222825872	42.3320490545658	32.6077756019911	187.443616845695	124.33443037419	156.602578637647	59.6942320047697	137.956874188432	103.288682897028	131.336035690857	69.209634344126	113.866845720112	83.9274396502275	36.1218706169676	60.3190620191213	59.6698946589495	88.4900079268513	144.8751019154	164.355756252816	80.5228020921844	79.187693623866	137.064796482183	87.22687061146	85.8188826458639	50.2712145127466	91.9690036987289
ENSG00000006652.14	1677.34312340132	723.58897169469	1006.53162767622	1171.43347797708	2087.11902499281	2790.5838010795	1021.84479298509	1307.44266609088	2285.36087139594	630.446382584979	1931.78421169958	280.624401297593	522.478563737313	809.573062885641	1064.70005283426	396.17051955709	3092.40915766162	1005.21203201549	1705.60581725253	890.283898365495	2184.99536808276	977.442448714029	1469.02367612171	732.352221532687	612.213841949339	1381.01257846638	3634.4391440589	2442.55385982617	1600.51638479476	1926.41610311634	1582.50501021644	556.598974026104	2103.62875634974	1012.8587756771	1136.95114484104	2125.75486386136	741.155871590826	2988.71275237319	2122.63442361419	928.823504467534	3571.88294463654	1841.68287048054	271.924084317718	1009.13081223145	1251.58584409665	659.769017125776	892.104487695417	477	756
ENSG00000006659.13	3	2	2	1.0806889455363	7	2	0	1	3	0	1	1	5	14	11	0	7	3	6	1	3	2	8	4	2	5	8.11235841729342	0	8	3	4	4.19518931087371	9	1.1657606148735	1	1	1	12	9	0	5	28.6847918877414	6	1	7	10	0	6	0
ENSG00000006695.12	183.968586111001	142.356088270694	137.768644948513	156.445893616482	129.26624847958	250.472663267341	127.596244095252	173.53030197702	225.000274490652	84.7145227653359	143.784701800778	96.4018096189172	98.0078206461916	70.3589218711546	212.763221542289	81.3430524056986	214.401937572883	154.429805842882	195.930921438638	136.22489726679	105.354622800472	227.799898280405	227.506927559352	227.689858768363	98.9084916353362	89.0043110795448	265.532458482627	289.121001155701	210.101750023027	228.112733033881	329.940801519253	130.903040926471	395.348767187899	290.730388040856	180.008057037383	241.353626367817	200.834341067166	355.231726555733	355.641158064477	198.501683471255	383.409777149194	409.300674663073	130.879612161456	206.446552671777	395.325791539141	114.245422113125	159	113.640556869535	169.468265860499
ENSG00000006704.10	14.5478090471149	19.5882632446618	12.3273790950452	10.3668249706308	27.651115555849	24.9362502635235	22.1834686468001	16.5719149042915	13.2249183477256	8.65271962820201	12.8919842053856	8	20.8503766549942	24.5169066579937	36.2688686059578	3.28952112780791	23.0245687881129	14.4252353204747	19.147514408052	6.2139027810282	17.4796041937118	57.8775554933112	23.3486012712872	26.997871519719	14.3392555445279	0	48.2090809870072	41.1636937354079	17.240632138664	28.7350514586879	40.7913948955489	20.4846527408838	43.0818572536227	37.4330951301862	12.2061269281453	29.5532493598703	19.4934210189445	29.4571144861707	38.0996017427516	45.4309337059509	32.509664749729	80.0701936436973	22.2515490724906	26.8983216458576	31.6340459647738	22.5459753852139	29.2709785091408	20.6641700951984	12.1908806429133
ENSG00000006712.15	1127	654	930	1210	927	1370	883	1068	1300	624	1622	405	1153	537	1232	529	1083	876	862	959	934	1210	1271	1357	761	649	1767	1530	1254	1117	1904	965	1882	1032	1021	1419	1026	2057	1234	2053	2071	1836	542	1582	2351	1386	666	1096	795
ENSG00000006715.16	902.235656483231	550.814233854003	681.880791605566	1134.11849464777	1093.39001875571	1923.53355633693	596.328613095043	1151.35309790411	1364.23170476267	654.254369865242	1428.24598692575	392.486472106371	578.604559411243	521.44576123869	820.566011898217	422.39193815756	1398.73227157281	716.229234870599	1222.70751507522	609.535199651612	883.065727357309	1151.88175822434	1113.3394441635	1063.17823491145	612.95647548547	735.676803978852	1782.55976460439	1780.85314498686	1413.57476179019	1303.09893283802	1375.11883654465	589.337949659136	1959.09903282399	1342.35059583176	855.804655696579	1619.5359551877	980.862759201368	2252.9349650972	1409.13460803955	1294.43488797755	2391.72139601024	1539.91390121167	399.329509116769	1034.48588906735	1925.41289855305	819.730161184354	828.171441755398	443.362511294702	832.244474578354
ENSG00000006740.17	9.00898103845235	15.0327871975764	12.0086753526937	33.049163374785	34.5854191296412	55.3229570970904	11.0115373556232	31.5386953130607	64.569063338219	9.03912985092711	31.1886807201502	5.04613119659403	26.4293737066198	20.268382164216	32.3346082470671	22.024088151024	25.0807533979764	11.0497750365937	18.332300783782	14.0182055061289	23.0946532775225	92.2263779566763	31.272219564564	44.204982193004	23.1262181362984	13.1056812607117	24.2118951649045	55.4193098358886	32.3825639000209	37.3892325812892	27.1709032585693	26.0779031438696	60.9188344320178	43.0313133592141	21.4638542804157	36.0312818633226	26.0506554924274	37.005077003777	48.6389303204867	28.1602301690992	86.0879346024401	93.0726713202105	34.4165504499118	47.0830379714403	55.151738106362	21.2559870458335	20.0241420478419	18.0293747621041	26.0831806367465
ENSG00000006744.19	649.682670412537	413.487065630226	444.268441493557	678.642994386545	580.788484036426	910.889976169116	487.089275449798	717.008859437961	836.684949418257	386.988824089281	652.969668947536	316.450812517497	529.358982623511	175.428475630244	688.00328587134	326.005101935071	700.621007211808	583.829460347813	645.857111788794	558.864602614466	425.238793904569	797.010971188294	881.036921826289	887.242722505077	429.892718735734	481.002772763021	1089.02447082538	1098.7195994174	887.810388619747	744.785996111349	1406.7768017194	522.387799873629	1481.02634917227	1059	576.775931563779	1091.252803232	843.257592669112	1190.0292605799	920.358543941703	1209.51024730255	1276.59456628115	1232.03318196911	349.489576934451	833.367774597355	1558.89704986312	633	540	686.452879553377	680.200773498328
ENSG00000006747.15	49.5388521146686	68.5979922848529	65.0434517474332	63.156825345353	198.706677306767	99.6759712984182	84.3325888950492	76.2511396138848	116.896069685992	103.331186891526	71.2263473781579	101.637700593068	89.3828884134436	84.4955516351218	143.084407684325	51.1382701779129	136.847653526779	76.6484875558449	69.8103786973172	100.212368105221	54.2409760300435	70.8950380450353	113.389750374032	86.093072998992	75.7830108745125	198.838694862505	164.284695937276	154.323120292646	97.1438676179341	163.092217409523	138.981431236807	108.578218859338	99.109470734387	167.94496345062	231.70354130527	187.419163974284	152.042217346811	71.5932576677515	129.958640903732	81.4673896597754	107.249046825817	263.943460766836	141.122121006433	130.440617093981	80.7861491329608	80.1380009474126	57.1425163034051	60.8197521212943	61.6684380019188
ENSG00000006756.16	472.018704683408	233.748567406619	266.836844995266	355.730893662582	694.584212612235	488.566839708596	294.511947068756	297.119402824893	538.59215955756	194.512060838378	445.191473964551	134.085062548884	373.236896976732	201.883343178437	536.669633519547	195.873625528073	578.171285274534	292.673661832215	388.080622873495	380.708937357781	254.7907766759	634.371085707137	474.088209719833	578.123331021426	162.974647669306	299.726557643755	562.133725977663	1160.67853663147	471.495906228625	380.56998824994	658.011665509079	280.931211924489	673.155091083033	424.374708116277	272.19026255458	551.261721108485	407.466129941111	675.795428738368	807.321941889132	697.800545101704	572.000585551072	738.862872614095	283.124392835732	360.822621665053	622.784971231705	300.243910006687	212.286015134424	305.104822420366	224.055749795659
ENSG00000006757.12	100.599654256507	44.4482850241017	47.4633706523139	63.6764817751745	78.3528626421619	101.408576703156	45.4716709849721	82.1545198951075	89.3680028733118	28.887373439704	91.5040991789287	32.1306982724062	36.28554383949	49.4192339538827	100.63092647575	27.2722653385074	146.736938578108	68.5187284987966	61.86966669297	58.4085137696155	40.4579760745088	72.786104466558	94.100077334951	94.6717752751879	35.5763500882832	58.2122341787036	131.024722491192	174.244443802407	89.5230623035578	74.0702768849034	125.423382686476	58.2202779607232	139.294551855943	140.240885631437	49.5296029987529	152.457825441065	80.8978608779723	160.108016041927	150.473094429847	120.069654165764	145.711120800484	131.600757507152	19.0287884719376	79.0765611515861	117.968092763287	58.0835113200586	43.4523975296396	43.1750934553457	58.5492980482006
ENSG00000006788.14	0	0	0	0	0	1	0	0	1	0	0	0	2.0539533172632	7.67725142205406	0	0	0	0	0	0	1.01309213127718	0	4.05034671661372	0	0	1	0	0	0	0	0	3.04023535083511	0	0	0	0	0	0	0	5	0	11.7321320733373	0	0	0	0	0	0	0
ENSG00000006831.10	1133	659	820	1044	1162.95260725131	1442.3529788165	799	1019	1399	579	1427	515	745	497	1047.15501810367	617	1273	916	1211	721	919	1134.27049548477	1160	1224	649	828	1723	1870	1159	1239	2156	807	2022.11455429231	1456	872	1675.12637737565	1215	2317.17744466743	1456	1509	1913	1642.46411942552	429	1211	1890	971	777	637	867
ENSG00000006837.12	21	17.9217367034081	6.980494435136	12.9200349046084	39.6336338103498	27.3896150836756	23.9625508617837	16	34.4056680351547	16.1281616897353	29.8551898984192	8	14	9.73468108891923	21.5354310111694	14.1870323257307	16.2155474107938	18.9194328035579	25.9756171588554	8	31.6506083871863	19.2545123021699	23.3536929583661	21.6385089160531	8	13.9486932184196	70.045447573555	35.4272302833762	40.8877916157289	30.831446361036	43.3860342635769	18.8700357325192	38.5628962180062	33.436131228559	26.2515626472049	39.161817045192	21.8811222236601	27.7590971509407	64.7191399849423	22.3244756360444	53.8847289320985	85.761377379269	14.8796855594659	21	48.913196628996	8	14	19	30.8968034083534
ENSG00000007001.12	0	0	1	0	0	1	3	0	0	0	0	0	0	1	0	0	0	0	0	0	0	0	0	0	0	0	0	0	0	0	0	0	0	0	0	0	1	0	1	0	2	2.12719050464042	0	0	0	0	0	0	0
ENSG00000007038.11	67	14	12	28	34	40	25	20	57	8	14	30	26	10	65	39	30	53	14	20	7	14	3	50	11	6	11	63	32	42	24	15	96	74	19	89	114	34	37	27	51	91	14	56	47	47	6	20	15
ENSG00000007047.15	800.959475573111	498.114503946915	569.652671689685	708.260343246764	973.685172736348	1102.44299002341	747.04159165585	515.047927793834	701.055428775125	395.888822289079	993.494215643595	266.755515493049	426.604652371598	343.799176923042	861.211832626134	294.63560199449	642.121967462384	353.256047467226	660.145921675981	528.20740351826	674.373121570763	939.135963400814	707.909956944782	806.016652494956	552.014987730323	462.729963813851	1326.15227837868	902.76322637146	556.603570472482	604.158600458462	1457.32515912553	460.678170402223	1094.0674694854	705	583.325366214144	1076.21039795856	631.965173264948	1450.27092365381	894.520856747017	777.249532344935	1229.45516503421	727.496843073812	246.008738703313	610.94851872976	1195.62697743127	650.039484439965	380	528.151546074664	392.019496276239
ENSG00000007062.11	2	1	8.00114493541238	2	11	1	0	2	24.0012559615663	1	5	1	6	9	4	3	2	1.00099204117756	9	3	3	9	13	4	5	10	7	3	4	6	5	4.00991618270118	11	7	3	0	6	6	12	2	7	36.0195072017939	3.00975323319235	7	12	0	0	2	3
ENSG00000007080.11	642.117976322295	347.177382259981	502.881534367102	561.612603006067	923.982165562474	762.495895220799	657.711383635997	723.178286625512	832.266557565641	583	657.507670750027	488	836.262598412925	183.65031364307	915.067538576274	567.891027583011	680.495290252574	492.109193390694	745.074103671642	601.239835299451	531.790438872688	721.898713371212	774.656737702813	864.479087065946	597.221947591007	700.020158214749	1085.65967477166	956.273212097058	952.851155177738	709.901112595066	1176.05957655114	879.563160429885	1013.06830182187	968.010908358869	707.891083162796	883.147701726245	899.434492986777	1092.67456021615	1082.55416483017	1407.25060772704	842.975792152416	984.803872544534	769	907.700035302777	1121.56146502004	792.355412258417	451.490711170355	570.075880175984	651.000205346741
ENSG00000007129.18	372.124121208465	191	194	314.485556075238	327.665061208878	389.122751807417	283.686310119891	268.238157298861	173.175750759419	154.169312720158	373.653524259771	82.2863061499613	291.210083307516	206.389638621387	303.560876718994	111.607419322023	416.792302536517	197	319.237170969679	219	251	340.427918426058	220.258421620585	281.323783057962	143.154810571995	158	234.562343571499	474.363214576371	304.330448438215	342.413834455515	481.763870359437	228.427149367734	622.735428428717	281.400333856558	199.228247065239	440	220	611.705576684619	540.900249978121	482.873418711129	465.654974387002	159.149149159266	141	338.219425607725	595.050219455502	246.368618401735	174	194.178159751408	257.343016055235
ENSG00000007168.13	2096.70184911313	1371.65815925581	1828.97388574078	2706.7002394896	2460.95743785239	3641.03211947588	1643.2456478695	2289.87009276745	3188.09777535866	1282	3085.87634656564	732	1275.23522409903	1144.29101150143	2063.37789509475	1006.25035851232	2957.42978926656	2149.2924381912	2460.92890690912	1779.18989284711	2367.19197807018	2511.18553325366	2889.84920523276	2399.36636954543	1228.26018319243	1678.57210516191	3735.1098005742	4185.83640752526	2463.47463817193	3024.58797657101	4267.01003327935	1537.42638249821	4645.53100750598	2800.71853898002	2010.03435149637	3867.49463063193	2111.39595088329	4058.48119134898	3028.41376661265	2668.26528822282	4930.1186053573	3759.63251854079	754.574909819785	2279.22962142798	4337.00534454632	1846.37964655861	1630.00165313895	1594.38149171948	1942
ENSG00000007171.18	0	3	4	7	6	6	3	1	1	0	0	1	8	5	1	0	2	1	0	0	5	4	5	2	1	0	4	1	0	0	4	1	1	11	2	2	2	1	0	0	1.8527679623086	11	0	6	2	4	3	3	0
ENSG00000007174.18	2.30609775713236	4.07491917041016	5.58089181311579	0	8.35493818625947	5.12468452449745	7.03083777278654	0	5.18498682656862	0	4.05357562438163	1.09987904095151	7.08829349487412	13.3513116040809	5.14307387782859	0	2.07846375536404	3.17297220752563	4.1682301012909	0	4.34929285852056	1.01494709974059	8.16218610980412	4.16666882788316	6.80514168670163	4.02347738159948	4.23924833781858	6.12662233791734	14.6583052075848	2.72716500945465	1.0914694556166	13.60304338319	2.30629964824633	0	2.03531341633238	7.24193738500612	1.00914548526939	6.38228639553373	4.17456229499082	0	26.7497426333299	58.878370190329	6.47681376211969	2.04409856828355	4.21502808000331	2.16381545457627	0	0	0
ENSG00000007202.15	2308.56281415404	1458.8827674491	1781.78651451134	2437.803397791	2577.94664902948	3392.37155114253	1852.10002820098	2627.77498354112	3076.03350771848	1364.73173309279	3307.15001498775	985.79261077388	1472.27104089923	753.103510612824	2449.5415576842	1135.12430940749	2705.26734752069	1812.10550089957	2621.9446276358	1881.2577991313	1936.54110333525	3033.47880253326	3267.46622506144	3256.22795395791	1393.71803655769	1510.05318633465	4068.03963188711	4417.63998014209	2783.32863475156	2766.99337159604	5183.88068890357	1583.63873526308	5253.14985356858	3110.63918045542	1947.85477265691	3767.04165255773	2503.75980414372	4610.81492532856	3417.25007720429	3654.42551137451	4823.81302458963	4397.21990664154	944	2697.31869535243	5135.3192022471	2245.32864963937	1763.32321601814	1597.12940508228	2112.88622900582
ENSG00000007216.14	0	0	0	0	0	0	0	0	1	0	0	0	1	3	0	0	0	0	0	0	0	0	4	1	0	0	0	0	0	0	0	0	0	0	0	0	0	0	1	1	0	9	0	0	0	0	0	0	0
ENSG00000007237.18	2458.98825757852	1758.16264504935	1905.61040396455	3024.86075960098	3348.07240718141	3122.05539802227	1778.19490560546	1947.02376270514	2696.50416345432	1245.42709358033	4294.73101121422	761.749773158817	1682.45902243003	1390.39233968291	2223.79128663995	1176.91487964526	2683.08300918949	2323.87226675992	2852.49118922198	2583.78770505994	2381.41303069152	3265.61808419097	3785.28736430429	2972.4484900051	925.937741522047	1834.32863753997	3943.49346523141	4973.38681950287	2471.81603904256	2335.24817695424	4744.89210030487	1927.98901443525	4278.68659316583	2438.66005047641	1667.00897828266	3013.68133371063	1966.3925862555	5210.03113445349	2455.26273625011	3063.87987279533	4902.01626947189	3186.21342309847	937.18790853023	1847.93730179929	4085.65360258651	2220.33195997557	1223	1521.18761156328	1535.69030205787
ENSG00000007255.10	409	137	226	283	378	465	292	279	424	196	232	180	331	84	528	155	400	269	323	229	200	333	401	352	218	247	592	548	483	317	540	206	589	536	431	644	440	547	716	579	533	455	228	379	678	316	270	291	361
ENSG00000007264.15	776	378.482826327589	575.516383443985	557.578401556093	1193.05855231486	1052	825	1042.60734039863	1517.34336337275	518	747.000013732594	761.023781194072	1037.5390192833	290	1562.06867709385	527.000451456475	1159	883.013775618696	1062.01843199911	899.030471837515	557	393.106554578862	1195.51269000284	1443.03033518498	461	966	1406	1844.21028842145	1331	1289.09755741471	1608.00570915027	872.068756105933	2166.10996297699	2114.11500783107	781.322968491414	2335.870488955	1556	2010.02661363682	2338	1451.24203882349	1580.05519860591	1677.95498424336	756	1289.04489558203	1337.54110068536	705	462	488	1291
ENSG00000007306.15	2	0	2	2	0	0	0	0	1	0	0	0	0	3	1	0	2	1	0	0	0	0	4	0	0	0	0	0	1	0	2	0	1	1	2	0	0	2	2	0	0	1	0	0	0	0	0	0	3
ENSG00000007312.12	1317.62119449599	340	492	1230.72883548387	851	1606.71775412287	990.767666742443	892	1079.54961262041	538	678	640	654	228	880	263	2287	1116	1054	966	834.575258937869	3736.44219530239	1494	1562	1081	1113	2357	1307.86626440625	3447	1621	2029.60400791677	901	4006.71103403722	2190.80124475785	824	1532	885	1777.70274104275	2337	3146.16852875137	2474	1962	951	1853	4298.71943395324	1264	1668	1525	1387
ENSG00000007314.12	3	1	3	4	4	8	2	11	4	1	7	2	4	10	2	3	5	13	4	5	4	21	24	12	10	0	12	11	32	8	21	11	29	21	3	1	5	6	23	11	11	33	9	8	22	0	8	2	6
ENSG00000007341.19	143.835185432038	52.5223026595563	68.4071184585145	78.6636381765184	149.84925680388	139.683917233241	74.9930804409201	85.2053369804285	105.019707668632	48.984881887431	96.1234518801655	42.5777851759452	58.3874406615884	70.8360887633131	103.77972197554	43.5879318631368	146.939328198147	66.5452597807713	120.316079081966	59.7684498187291	56.2958806746732	114.302494514048	145.456863699161	98.9603422677605	46.2217227225135	77.8218230444719	174.948158949937	186.837624603983	163.849511263217	125.908020419333	166.095136467125	55.4555707355576	167.098209987773	105.43202214122	102.092613589052	173.018035580597	74.7682066834788	169.301255652337	203.016163695786	177.964659296317	188.91535334989	188.116499159649	41.8145308703246	125.142348289816	177.275664317427	78.8100628132921	62.1365995386473	64.5331539921123	79.9044389106527
ENSG00000007350.17	65	69	68	117	37	149	153	77	205	94	71	33	46	28	79	32	103	97	79	44	59	55	79	70	42	52	118	157	143	139	97	216	108	127	118	183	76	139	83	94	145	274	62	73	200	108	111	98	82
ENSG00000007372.23	0	7.40262909518577	2	2	0	7	1	2.00590948336053	1	2.2945913997707	1.95659099406246	3.08016274249994	13.2558919714361	18.1876294250628	1.00130553799206	1.74694937779014	1	0	1	2	3	1	16.0302456453686	0	1	6.34234553064307	1	1.00618091475033	1	3	7	9.55561475092449	1.55993293989863	6.00007588939882	3	5.01133331925757	1	4.00251205270103	9.27998357665167	0	2.02413461630784	73.5142698861356	6.88981936686019	0	1.00000793017608	10.8053712715721	2	0	1
ENSG00000007376.8	408	264	293.984868514171	454	539	550	414	408	558	232	515	208	431	134	553	202	501	294	415	313	288	517	439	433	258	333	734	721	605	536	713	337	837.963635785118	709	397.959729038284	593	398	921	634	821	571	714	228	469	772	356.976770309317	224	229	257
ENSG00000007384.15	2	1	1	0	3	2	0	3	2	2	1	1	0	4	1	0	2	1	2	1	2	0	3	0	4	0	1	3.0010513483914	5	4	2	1	11	3	0	2	3	0	3	0	4	10	0	1	10	0	11	0	5
ENSG00000007392.16	1035.73244151628	383.534512307941	527.70655767642	681.077322904548	1054.76480519193	962.156556434459	599.116319990363	879.681981299988	1075.71650788884	356.930976415708	717.690724891308	386.00562493495	543.620984654988	262.282499310208	983.614393346695	350.512186559659	1067.03060177627	628.678297496782	829.903191244181	630.771323366243	519.125924855436	910.055417994683	1039.83257714291	1194.15388054589	500.236932514401	620.576270882307	1714.92095558484	1726.61221684935	1184.35546710229	1005.64047856372	1412.1620287745	492.13035755202	1948.19729496655	1238.5180100611	892.325423653109	1343.37841863562	904.048248980896	1699.23305594809	2259.14894096766	1220.39772441403	1965.07973876104	1631.23869054809	362.745852893331	1212.2697184045	1686.24753918107	605.011802064562	797.225661880947	612.756674553317	801.256451981694
ENSG00000007402.11	78.9005256295687	64	71.2419953908178	71.3229819804599	124.207825406389	127.063862296862	80.8001881565963	210.39692879413	159.56636104274	109.834815467877	135.590843956569	159.769122276955	94.4234119837013	16	121.038955547502	74.9256507063442	149.291102224752	132.568377680226	138.65427329231	121.029504171217	100.371926630145	54.2562237545367	161.338279898154	351.158313341712	42.176926592211	119.281600804724	136.645140802682	208.465404358078	119.059339185517	114.196099492954	299.905616773196	113.101277524553	391.355680957931	372.72038041005	82.9797065771033	187.293486931241	310.622625692352	327.270227045414	277.026188782427	122.208572242496	175.237657485715	209.260541845932	61.4384661995619	155.169625701333	212.30019335943	49.4989921655892	77.7717784983109	79.099335434151	210.298394087779
ENSG00000007516.13	422.11641702799	255.164376393438	231.480186533634	350.725578483173	412.689332292866	397.505508203504	189.139900069116	434.249022726621	287.059167091271	228.267506379509	345.299145792869	181.229783515844	184.045598945126	554	614.428163698743	310.265306491403	457.722737902012	319.481594950343	132.087055789463	303	393.48879816675	1190.8214074869	661.689806925978	357.220941803227	256.121979952175	401	1038.82387675595	944.851421794251	354	541.792033577149	269	340.554298447377	660.185688720966	550	276.167931637741	898.385979740104	465.649465130817	504.668591069496	467.576558509408	520.178499425201	1043.77574239189	287.703309787813	157.236871382051	652.333697165367	966.33164307136	216	240	262	358
ENSG00000007520.4	642.88358297201	269.835623606562	436.519813466366	546.274421516827	833.310667707134	703.494491796496	498.860099930884	530.750977273379	883.940832908729	343.732493620491	668.700854207131	285.770216484156	706.954401054874	303	755.571836301257	404.734693508597	800.277262097988	508.518405049657	671.912944210537	431	440.51120183325	723.178592513103	694.310193074022	583.779058196773	415.878020047825	452	1027.17612324405	952.148578205748	781	704.207966422852	1005	459.445701552623	1037.81431127903	814	650.832068362258	823.614020259896	671.350534869182	1218.3314089305	970.423441490592	1130.8215005748	907.224257608113	827.296690212187	418.763128617949	642.666302834633	994.66835692864	562	406	478	480
ENSG00000007541.16	496.685422631408	325.275735618441	413.397237748914	476.550442163834	565.219766265564	591.348816821598	506.419488146866	484.273927296425	693.912680773635	343.097933440328	584.525509116686	310.408517866634	518.465304538233	194.463943578291	765.517787676471	382	672.901371663201	391.331528310624	460.434732065203	465.137970897869	337.445221241713	545.58708967719	555.47792973473	595.35764989748	323.342844624724	482.674266988116	1040.84106376509	842.910062596847	664.492226036353	494.044067091035	820.984817074621	499.762854536409	821.98450871472	581.375924173117	384.558360305398	808.804378192181	624.473987669552	961.541574687351	653.110478201902	851.284337636164	799.516362271721	841.525117064355	301.165195961342	654.243938081933	914.958513057326	537.400361617737	258	429.641206819865	387.181971465408
ENSG00000007545.15	410.961230899473	268.858093739772	393.516156920092	547.538820600984	491.665787042966	804.643881733739	364.883829448786	580.62364424039	749.991373689899	254.923413600925	526.707947601584	158.830499917798	180.784681814723	183.189044025586	454.503269130413	158.34983296972	651.04764219506	423.552324257407	655.895741139351	373.258993247346	322.781961365277	610.958841276804	577.56465901496	565.854332347488	279.753306208877	430.63018836176	909.133568057896	958.450676411055	635.326388119051	751.824992217349	938.353109456949	252.278306444409	1227.91034654323	595.130709755126	403.931182784939	797.055726834702	485.821630705917	867.875050349544	720.579860940185	535.632697238822	1033.28278620662	843.508876951542	125.481402651406	606.635192187359	1040.14431342237	379.989694455438	493.257910730588	232.929867141303	471.328593618858
ENSG00000007866.21	5	7	4	11	6	9	5	8	3	2	27	2	5	4	5	2	7	4	2	1	2	5	5	12	3	0	8	9	8	9	10	2	8	2	0	19	7	18	10	11	8	5	0	0	21	11	2	8	6
ENSG00000007908.16	0	1	0	0	0	1	4	0	0	4	1	0	0	2	0	1	4	0	0	2	1	0	1	1	0	0	0	0	0	0	2	1	0	0	0	2	0	3	1	0	0	5	0	0	1	0	0	2	0
ENSG00000007923.16	525.911469478565	331.612503618446	400.276179752203	459.982334802123	559.460544477981	664.184716406423	414.386008634056	590.680323410616	715.267099184816	265.991822767455	491.058112844056	308.478045827323	337.549403418063	133	639.848614404041	270.492486495499	588.675219725299	443.597061603591	578.499509754307	478.629281943583	323.608073977525	634.316748634	630.475710734791	816.428159116041	306.507588238369	314	935.45475549966	872.582984098761	684.239994911946	620.643267639734	1104.35859646883	356.614104454249	1171.99603766872	795.588899080607	485.523329997893	816.160076275762	607.492473107631	885.377617653253	868.469586376973	955.782801293226	1028.82675673969	1020.18787194479	253.283837801841	686.677333703664	1167.05506585022	457.90111528362	441.891079442456	447.641993157739	494.621847367279
ENSG00000007933.13	7.54998675037088	9.038904148655	10.4839934871505	10.6308705378845	18.2619136106882	11.6050072425077	11.6305952512847	4.6117741286684	19.4726814572413	9.07876219867509	15.513832670758	4.58016152506189	23.9738316570188	20.0703049607074	19.5008696324449	5.85555629645261	20.0917579861692	7.01231437845158	4.42870797941931	5.84355779611937	3.52877852376898	8.29151195715831	16.4980240343436	10.7057716368571	5.18308553058224	9.65635706605781	23.1513289053662	27.1552074535575	34.8545869587398	17.6646153688525	18.2037636483163	8.53680865854529	20.7850877511052	2.83029372878975	11.5760299610315	16.2804215155157	9.9880859057122	32.3953593929631	32.7734703838938	19.8688266465751	18.2226516319488	42.2990070603663	13.215076076715	12.5175297424047	4.20653789793143	1.04783410728334	16.3219440574511	12.0420686836854	6.78680950754022
ENSG00000007944.15	1325	711	917	1746	1583	2156	884	1505	2023	596	2123	314	560	621	1027	358	1918	1067	984	705	1513	898	1454	1239	728	501	2492	2150	1369	1455	1982	618	2302	888	977	1976	709	2264	1176	1139	2318	2033	270	1191	2063	798	791	600	967
ENSG00000007952.18	0	1	1	1	0	1	0	0	3	0	0	0	2	2	0	0	0	3	1	1	1	0	2	0	0	0	1	0	0	0	1	1	3	4	0	0	0	3	0	0	5	4	0	0	1	0	0	0	0
ENSG00000007968.7	194.384055021413	165.308110357664	234.551777396644	290.372762754283	355.118974994547	302.908238798967	356.307116329359	311.053409206106	287.737829189152	258.63533109071	181.723091124948	293.373622454816	332.418855647611	65.7963735958435	359.617601227711	452.62359469607	230.483266776296	276.267004351459	260.665256024033	312.691393764599	239.98113506974	437.527715701026	244.506478226536	330.421331353498	185.517781070149	268.312457697559	418.626247699832	382.11539731365	324.441512947934	300.642510515946	518.592642389305	359.541000300875	359.349879501728	427.634972765431	194.31538642461	420.194002328852	514.670693885229	405.515720045142	368.977536795075	456.273824692432	365.4587019539	692.005062367023	392.350931025531	522.145247953135	605.265496481631	246.851630649023	204.426598439142	272.666589361345	282.805888534921
ENSG00000008018.9	1020	384	574	612	1499	571	703	647	1386	311	855	372	516	491	1157	537	1523	658	1251	498	668	1332	865	646	589	811	1737	1314	1490	1089	1372	561	1547	1723	1057	1366	1128	2486	2614	1032	1245	1487	440	876	1058	516	679	563	717
ENSG00000008056.14	3	13	6	6	3	5.52547318188079	6	2.22067377683859	4	1	7.16673262894153	3	14.7886532654949	2	4.26253383598936	6.27160197037554	10.5335398909325	3.50913370231807	3	4.37667462040029	3.12931177144324	6.12698802145745	10.1842610365725	2.31594080878424	4.34159602549085	6	2	5	0	28.8935905332906	4.19511656318212	1	10.2951935859317	3.02903718666477	2	4.34159602989171	5	12.8434164927259	1	9.65331521358502	14	3.06091591444512	7	36.4147721001503	6	15.6985512190529	0	2	2
ENSG00000008083.14	1616	1381	1536	2374	1765	3376	1430	1655	2516	1183	2393	505	1070	875	1285	668	2254	1431	1783	1840	1784	1554	2376	1891	1163	1497	2945	2528	2174	2447	3622	1587	3884	1315	1420	2214	1436	2719	1704	2483	4546	2742.98660936889	579	2450	3746	1681	1389	1512	1408
ENSG00000008086.12	227.115593599236	239.180179618001	279.580058570522	363.455198657782	348.282934897082	541.740535445749	193.525504049511	329.961556220453	413.196612530661	148.283364383659	472.431172645375	69.8621549984421	240.917349513941	322.188133381555	289.460198595741	111.584764163384	376.06527229664	212.617317800737	270.762729824712	205.938281065923	309.661743944781	260.84351619959	437.590393072662	307.211946624009	146.466597617481	194.06717848204	513.534456390244	522.425359619264	351.483768635646	339.018984542415	593.671336036305	298.569815494388	457.948917479336	244.608669710251	231.324743865463	429.63984129731	228.081075764224	468.02670340639	274.232416538532	264.336107872855	533.950308151298	952.087736562592	229.926941442149	278.329234560272	392.479534179439	202.738359853357	141.447532506566	137.223705266236	235.192069998961
ENSG00000008118.10	1	0	0	0	0	1	0	0	1	0	3	0	1	1	6	0	0	2	2	0	0	0	0	1	0	2	0	0	0	2	0	1	0	0	0	0	1	3	0	0	0	5	0	0	0	0	0	0	0
ENSG00000008128.23	1003.89201003419	918.310410914031	1186.51446912547	1401.02535458583	1443.77456161506	1739.61798890429	998.897191644996	1314.89586576607	1751.97172219084	948.826165166155	1340.37986904888	52.960549377943	1157.95248069623	750.884301031596	1950.90777168273	661.240256039339	1676.72383142631	1069.06387277491	1248.55836642298	1179.42764287728	1253.44405268076	1406.55895613727	1646.48941675474	1664.07559708896	887.521196573011	915.214108931056	2652.76176804885	2410.67225435563	1493.88137736936	1737.67172620036	2165.78797930692	1108.67922599741	2591.91005212591	199.089403593799	1103.48743983736	1975.38597635387	1195.89114169875	1784.82056159796	2002.19465755599	2303.77871131738	2755.31320107918	2053.69059038304	1007.68441086394	2058.9446697288	2808.67420245557	1173.28218729838	983.397331381171	1025.75157939632	1173.51326068003
ENSG00000008130.15	12967	7357.04360893137	11769.5256024839	14169.064739322	13205.1152282016	27586.1099734558	10614.9987824343	14541.2174555653	18722.756141544	6342	20704	2415	9953.79788874219	11622	10692.0455278662	5389.13270540562	17061	8972.36621777743	10199.0522028476	9270	13950.3440731925	14288	12143.1333360762	9347	7313.13878916351	8753	19342.707549924	18435.5679220299	12514.1459354433	15839	17286.0316057779	8117.02099812172	17876.9086113891	5451	11228	14699.0050834412	7700	24475.3460294684	8988.93505841555	16930.9274835915	22101.4434713024	19211.7545438384	2498.68043755121	12413.0376001231	16970.0240853666	11361.0420005568	6638	7066	6952.41756961749
ENSG00000008196.13	0	2	1	1	0	0	1	1	0	0	0	0	0	5	0	0	1	0	0	0	0	0	3	0	0	0	0	0	0	0	0	9	1	0	0	1	0	0	0	0	0	22	10	0	0	1	0	4	0
ENSG00000008197.4	0	0	0	0	0	1	0	0	0	0	0	0	1	0	0	0	0	0	0	0	0	0	1	0	0	0	0	0	0	0	0	2	0	0	0	0	0	0	1	0	0	10	0	0	1	0	0	0	0
ENSG00000008226.20	193.021375413381	80.2465681518306	81.2233528226566	115.903288763809	171.346432432118	198.114679109361	96.8316015761183	107.987754990859	206.525503711103	37.0172022615132	167.250198385973	80.5964771136161	68.3241880399591	89.8549728292846	166.84021610112	39.2860585881948	225.311330776809	91.7479842586163	128.501040941807	104.02772660746	73.3759938073919	84.4195174387893	134.540764687967	155.780974810716	48.3497578048605	93.3314057587153	321.051077478926	208.384349513081	231.235613049174	132.61929871451	249.087000675061	72.5405256775462	245.649182665483	232.482805102359	98.3946215374519	237.201523332808	124.208532172375	275.592352164027	291.572683104466	140.571023477162	297.474131812746	240.428690319778	61.630932371678	197.461080249868	182.716648827272	61.7591377784117	75.8458694693708	85.9903566961804	123.93234967007
ENSG00000008256.16	167	85	165	235	188	299	118	283	298	127	303	91	93	76	249	108	254	222	285	261	209	247	289	275	91	184	304	522	232	300	366	182	563	354	150	426	292	421	277	334	544	351	108	237	464	96	129	129	287
ENSG00000008277.14	53	23	44	35	57	88	19	55	49	19	31	44	11	15	56	21	66	59	64	38	31	32	57	54	24	27	106	190	54	51	111	24	120	99	42	83	63	102	120	47	192	101	18	58	97	10	36	18	54
ENSG00000008282.8	781.038154323948	308	510.028473512136	711	772	1240.21141231574	496	661.135984772154	865.093551542895	317.000000000151	714.105866586571	258	276	139.087720887052	601.261897670445	237	1023.64888576394	645.004663361938	930.083746376803	475.104913214797	566	1144.15222097143	873.114012763746	800	483.315103923359	582.166358653746	1274.89706135135	1455	1080	912	1379.16589191806	382.002528198256	1610.24213261148	1028	556	1149	693	1196	1394.36235151764	755.00771682374	1563.00627310213	1094.16765065174	267.654243495808	588	1646.09094153952	440.001583677011	506	333	661
ENSG00000008283.16	520.331052740055	214.182725783852	252.807829156516	391.446268553696	732.862141529785	989.044455092872	367.206987926769	867.5005935434	566.870101767374	341.477729419361	427.057509468886	322.013182135808	514.161226354424	218.829684465113	825.620444349797	259.468832347311	476.90691924642	413.92615595914	609.960441993087	471.726651496583	464.380403384385	435.020521581471	548.69511258228	551.83109522618	347.236850362133	375.361633535136	827.367992393785	911.998318294396	496.860229380645	692.328761380233	807.547131283472	352.727282476592	1039.06805838477	993.595167355914	361.92962293333	1024.67316019073	665.760461831661	1015.70741637135	1429.38050286751	1423.62011034292	1169.04577300111	1058.16257851632	349.607482223244	804.694577696737	1012.91409017991	307.975250046176	390.27396509191	443.304693293624	798
ENSG00000008294.21	1966.68160765426	1149.2286464745	1797.10581400407	2289.97492928958	2581.22898399589	3699.62384405627	1316.95235463784	2019.85613514167	3278.10626212938	1025.65235681289	3073.15138143526	397.536063764966	721.556935062497	1198.06330234254	1534.33331338116	608.696536532039	3189.95634946182	1599.37239221423	2274.50728928853	1436.42031490586	2294.58036969421	1942.27821863677	2524.18456518323	1525.42001634988	1039.90467829451	1569.44972406827	3900.86449265368	3556.1779565647	2504.84305568831	2777.34030301726	3392.223070561	1204.46416640514	3733.33284153692	1484.49134731139	1978.0932327867	2877.10368839844	1615.32458304943	3900.06230192022	2731.90911715454	1499.97719910945	5294.91914388016	3200.78073622272	532.175399074211	1815.32465743938	2913.03501277883	1075.83178276988	1511.37486178024	869.16114404323	1398.49251709859
ENSG00000008300.17	87	43	52	138	73	143	99	83	110	36	70	64	27	34	144	20	66	65	103	68	69	54	116	116	36	19	148	129	126	139	105	78	249	169	55	139	93	143	166	62	218	211	27	180	234	38	123	44	69
ENSG00000008311.15	53.6825154851058	27.1078544732304	31.2050959874349	41.2928217702953	23.9773025041122	96.5866253277935	18.3333266037267	33.7654493071416	36.3876059155388	12.6222040976587	33.0647736443581	22.1558591480319	23.6360076187323	17.5536428489488	52.5473212505069	12.0925739282806	65.7085346680291	37.1747522221557	64.1083582724681	36.5718655767914	52.8539421924281	47.8929310133316	57.1200888624911	66.9839059021087	26.2271317411775	39.792170342753	97.3047314277854	101.681468680622	66.7741900977224	32.4686434936191	59.3997560820064	34.3779324198421	129.839167952945	53.4349181578826	40.1292862221793	67.9508669422854	25.1688862075241	94.1346378639667	72.6568944429015	60.6059039218538	140.16713533149	107.144044619125	33.7495236889313	37.4106763512156	65.249645882995	15.1289085776351	23.5846946844363	36.0195623553401	62.3746865531825
ENSG00000008323.15	27.8906147835343	10.0361985717051	18.0896908657239	22.2034910453062	46.0787313015654	65.0957173643419	12.0519532965699	22.0534568845192	56.197165895188	13	57.0384999126203	10	12.0941304819492	21	32.0656091405169	11	45.0017039454935	21.284465805896	26.0608492301912	12	15.6048087217442	9.13363836130311	33.3750201921792	18.1062398643981	19.6270732431987	27.0264823816663	69.251930934788	61.7837158899394	49.3649320816157	34	39.4100404443302	16.1952915500476	66.2526709977151	15	15	33.0226049236858	25.0962635051422	71.3727513768722	66.1392963728512	13.2549163631116	59.103942826905	61.1326675418327	9.07427072078188	45.2247585380615	31.1495096710252	30	25	15	39.3673732884554
ENSG00000008324.11	187.012885605789	55	95	103	137	113	64	97	172	39	106.392370595218	76	65.0153063101047	33	176.133630159601	81	207	112	209	52	90	201	164	94	86.3584969352549	153	190.020024306902	210	302.617398477872	153	217.382493789353	76	259	427	181	221	188	416	574.271163615075	159	228	249.302765171653	90	93	195	121	138	83	139
ENSG00000008382.15	226.109499301044	145.05866135623	179.270078176161	266.882205945199	352.650884194011	374.656442250748	310.819397530679	253.548956000313	428.016170671131	155.527333339373	311.024538614066	122.629860195458	285.316661743017	107.070196480341	371.973683794305	168.37531678921	321.546754256759	172.542729738127	294.417222244024	209.128983124054	205.185282182321	333.405759241528	323.045987336196	330.66096186984	183.689705479179	231.94624063134	432.307427219522	529.675425081364	357.766259025877	317.125084353146	453.296364818523	267.234997148654	460.017549124345	379.43952134697	258.227407483766	399.108241824529	304.042384886986	508.612484166602	443.752186631772	500.511862079813	518.024531470095	477.493181721269	203.03032687354	316.258141853218	527.17705819242	313.072127013385	145	198.506771589845	274.650292845059
ENSG00000008394.13	274.480832464864	134.234070467141	124.076297244867	161.088247459408	433.439378009402	181.425939704267	147.001113056568	89.265655130833	338.123760435921	70.4194077460988	255.173767131729	60.003595654362	238.875987496962	91.973644044351	222.144651645172	106.083483008519	228.390148446491	72.0926848040943	401.140200145088	86.0089012807056	184.046999396909	335.096836169399	186.829456708733	177.213502543872	97.8559053368355	237.245367430829	361.867525287999	324.028568110708	153.460768434665	203.078711379434	475.233155200753	128.003076616576	307.282972551313	284.051029308359	161	196.468799221347	161.281716120674	466.384340668186	396.136497791513	278.366819709269	233.187954846182	291.078919202555	78.659601233697	147.683823883896	235.455911383856	184	87.7330347774006	165	67.1250096321794
ENSG00000008405.12	206	100	137	186	183	315	99	239	221	89	187	71	88	33	154	70	259.58098614399	219	193	146	143	224	331.933282281667	241	87	160	342	455	254	255.952324423824	308	119	506	365	196	394	274	341	439	203	514	356	73	278	399	136	174	93	233
ENSG00000008438.5	1311	440	801	959	701	261	760	249	1428	445	1019	81	1198	605	792	444	1235	330	416	341	1071	1133	462	256	259	256	1248	921	197	486	935	335	361	100	536	929	300	1090	261	1084	176	982	124	345	456	571	125	427	166
ENSG00000008441.16	279	421	545	272	738	315	422	550	529	786	403	783	592	109	1074	1644	271	647	578	1202	530	457	630	1169	611	658	441	386	596	294	676	1035	388	653	425	820	1253	408	519	791	304	492	892	574	460	528	238	320	307
ENSG00000008513.16	2631.23520602444	1758.0694460134	2407.19777617541	2300.06448806746	2902.43296916386	3918.50254787695	2228.2870812202	2924.77122635861	3468.91833253293	1818.41639738427	2969.83489691632	1330.98546505309	1944.8317808394	1506.66472859188	3077.71295224166	1843.44409732555	2946.29095531507	2401.96741035997	2702.84063942984	2536.4433359653	2195.66554380779	2622.29430553074	3636.95529511794	3230.9880950244	2013.31721756237	1861.1437578183	5239.42640303035	5549.75338825429	3502.58156224032	3332.29604895953	5810.89833223727	2786.39911371004	5318.93856895167	2670.27048887149	2413.26390615166	4153.30706310395	3399.79627944428	4170.7235139343	3309.12848161327	4029.74530178312	5468.82719939217	4378.22347368108	1533.1636642717	3336.11787972346	4958.16200568773	2223.36879911853	2080.64914955299	1828.85137634096	2569.07879153634
ENSG00000008516.17	17896.9383347956	13682.9705303441	40203.6789774599	35890.0132213217	26141.8771087638	25798.8590465393	14939.9135518897	12588.3583741522	28791.7693715172	8227.27937002604	30302.0516635208	2649.16006428992	15337.352963525	19330.1992653311	24430.476820697	8050.84814805053	21094.6503577825	16352.8343878679	11362.6309893532	23488.2996009262	22860.5445658574	13626.0388862907	16921.2955347232	22963.5212934151	14298.288704692	10849.7200235807	32725.584088291	25125.4036227268	15128.6586800478	16388.0139410388	22111.1724276582	13376.1313993225	21485.0350339894	3775.42000851674	30117.9171450837	25206.8226835573	11725.219786828	33922.7377742505	15929.6496278351	18059.2180311418	31157.9475425192	22238.8409355922	2200.83115628746	12955.7427322104	33644.8844413998	13868.3986364298	6140.82031251352	15378.6534978726	7045.09776905302
ENSG00000008517.16	6450.06868920484	3357.2792129914	3481.51950609402	5310.50987858682	7639.12767860145	3808.33649246798	4483.56974254556	4131.75496014172	4510.9970152829	3044.21770790958	3782.05207930149	3884.06513234818	5493.34900223317	1824.21203932192	10659.9123309841	3831	5532.5903609428	6048.51153311993	6018.39361731234	6467.20928394885	3663.21463135769	3844.51345499362	6090.73124388009	8800.09434546638	2771.38060148776	3501.54071756966	9566.31708062032	8791.94622888333	4088.65935907795	4521.3659771929	11605.5368929844	3745.07289478618	9103.6291422978	10793.1322967336	4621.20275298314	13557.7781013235	9224.4308695805	8940.59605863775	14661.5427910831	11112.096371452	6270.26755851942	6836.53313309633	4756.19360637867	5799.05526234736	12527.5004513198	5540.1025189947	3152.27757109447	6280	4971.03184259737
ENSG00000008710.19	838.316541075962	561.726304873895	728.578320112109	854.810620455375	876.790685195476	1621.96934070521	636.922965396269	1229.53345399649	1069.42616029957	502.476018810064	827.910051605627	402.115210615136	323.628448947661	208.815399199733	1176.47584940382	298.279015295928	1182.62385409672	708.749770205807	891.8585296681	769.99313615654	501.618007125694	800.844785152574	1393.06752539474	1359.64130207919	484.683492234131	563.453102538614	1689.10390465209	1822.32435095897	1211.23190604174	1145.73206935667	1636.8765449513	541.277269604336	2527.02809412806	1307.08950260866	713.372909617735	1554.04055302068	1167.0908059505	1372.60926518542	1601.92159584205	914.500770308583	2269.48873001256	1861.34191968199	262.521684694169	1480.23674296132	2040.23807360933	476.318357079334	781.971591487613	531.128137352579	1002.76459532866
ENSG00000008735.14	19.1290767521229	6.26497624220234	11.1093608300794	16.1835384946827	31.4000575922147	20.1998699845384	13.0724363355863	17.2854929179736	23.2217361817242	9.02503758937233	24.2016043317986	14.2028704237194	28.4640673755386	20.8019331348202	26.5643845946837	7.06232763608907	17.5658142019542	6.08733287765463	23.1834784215844	12.4079329765592	13.0295465810236	12.101872387242	28.3855830934622	16.9550991251715	12.1337912316469	14.0426065342587	24.4272327958223	23.7899301208379	24.3603577734784	22.2411355130071	35.3028749757359	23.5933201544726	27.2943371018351	16.0141719516078	26.5406212808668	23.1621278401136	5.05886709584075	15.9921526393349	25.1994383543568	26.2543784309834	35.4833592667517	58.3089246647367	11.2113103794803	10.1399144464297	19.6714592858664	10.0859169021939	22.1440078484395	5.04750072172263	3.02639852474172
ENSG00000008838.20	567.043629136552	402.786397579052	520.030715659259	592.759136021428	615.363247246074	877.384604939967	482.108255711277	659.416335604877	745.460330441433	310	584.728967446206	302.659945226155	420.386292945044	144.178301950253	679.377393447623	315.596915100757	599.68791176177	471.052306731975	540.153750659424	452.144725888371	416.809576373298	751.355915614461	878.071930510739	968.135923683645	365.55063423997	427	900.690349039974	1066.22527036223	788.02322894098	804.213842254165	1232.86988109304	448.347057485215	1427.45930418664	995.342614148267	518.505660580033	997.250668935078	734.090437951666	1023.30412087305	930.18804825985	1037.46556493326	1182.46954561369	1328.52287815383	269.841680914838	864.729351662203	1467.26265923233	571	454.93245869782	425	634
ENSG00000008853.16	249.171262446291	99.0248699964659	144.609556325756	262.84480590397	212.688298536857	473.079928867708	156.081605496819	299.65436386072	270.37668892593	158.265669912502	188.342468275259	147.435217056916	118.492311454753	40.0876267670421	229.644428782397	84.9909135722783	317.965640639822	200.141267446127	240.406531296734	229.245596161805	161.65108625424	299.735655126327	353.285708183217	338.573761961295	139.102094007646	265.31890245019	320.155342216008	410.336782630916	404.449484977816	265.344507637657	405.828557627365	167.684836411208	650.024104664654	509.69078083418	171.73768052941	423.238631895498	235.687743690095	349.073379975494	456.599592112298	344.924184654677	611.837472835075	463.306047060709	127.574190157317	326.860839865322	649.404054945707	136.29865335767	193.935453895153	218.097759034543	371.014117085867
ENSG00000008869.12	547.038727677867	372.244295937718	583	710.043209042301	647.075050837397	1401.03250236438	449	934	823.012086804687	330	766.000029101684	210.165990181868	242.208970087141	139	505	222	880.011438621481	711	832.080246596237	595	633.011609773113	655	1002.02492938215	903.01144742493	332	432	1403.18047187341	1475	955	814	1493	383	1677	1000	548.088451750652	1180.0161425381	774	1146	1253	867	1761	1359.40886761125	191	786.012185574771	1668.0126782032	573	801	385	869
ENSG00000008952.17	2387.60304437479	877.211928456015	1557.9327135666	1710.07607840388	2614.34689568227	2058.81129784135	1473.91559737243	1556.64889028535	2730.34940595555	1318.22223969888	2373.89695471924	1356.62933394283	1752.47194946735	781.988788537303	2609.38373257517	2354.72726943194	2964.62782988786	1667.14873143281	2829.48094696973	2409.24806727314	1859.74663075567	3041.12082275374	2129.11453947796	1655.37072998453	1200.34382767288	1986.63544138429	4341.74733796722	3634.44101317368	4287.5846006305	1837.2493667263	3457.99881749308	1328.40772022614	3685.76964117527	3613.1472400851	2485.11075156495	3446.6497406839	2609.26143108552	4369.68063583979	4588.12291890197	2578.14472018121	3233.2365073625	2723.32571860253	1738.09892808351	1772.47599507684	3581.74340258811	1871.83079893637	2045.22693958877	1455.90367851883	1687.04899692174
ENSG00000008988.9	6322.32111755884	2180.36725825416	3192.32106694989	2928.0622899651	4542.84913092366	3079.57113178513	3858.15031367011	2573.95797016374	4757.38217524508	1586.20362213198	2544.84957078766	2396.13014344615	3245.1683011062	1208.64561209818	8014.69345159859	2085.8012077158	5936.9897067846	3360.39529403567	5107.52194813736	1819.58008660378	2392.67531528469	5993.37489359445	4467.32976750662	3910.32478360467	2834.71370814078	3607.10175709834	8232.04137885738	7187.5439378122	8682.52410277419	4461.19193688949	6209.17944110959	2552.01506367484	7667.21109366934	11276.8966565823	5264.78095972692	7887.27280836172	5069.43515410423	10808.7874498686	21373.4138190522	5578.21745027143	6825.89166743713	6029.73032638262	4169.08246242303	3713.54838002802	8232.7283215634	3249.406352913	4884.73923846648	3580.88044923382	4592.74310116263
ENSG00000009307.16	7856.50029549311	4368.67487724763	6440.62437864266	7729.58888001788	7682.42946653601	9966.24870636861	4685.78884146751	6744.4072174849	9740.50996727833	3561.79048493778	8475.69915838366	2902.87382047122	3828.92009521933	2679.95768419258	6505.42306978652	4860.85589055377	8743.33300952276	6843.63419572721	8934.33899941257	5691.75377270828	7448.57997144933	9610.38365522532	9436.15282358625	7196.51473518577	4193.7458845012	5383.69812614105	12876.3719765606	13543.0010628738	9558.95018406716	8357.20308167864	13642.3067778284	4549.91992629128	14024.8784529982	11412.1826217551	7128.64217493193	12348.8975678761	8606.10069185209	14248.2052542225	11209.2240609319	8577.79807748113	14694.4368392182	10796.1593551355	2589.78588028206	6922.41779871106	13983.9251722417	5542.92878332935	5560.28750893054	4641.86345790738	6208.44996334792
ENSG00000009335.18	828.78570687737	510.063150453742	630.300863722192	952.712136770646	976.55960219031	1238.34047177137	620.466837196433	988.901043126366	1132.73423840089	472.031858867218	1029.43656440499	336.252405182754	357.569464983206	271.462458691506	742.481160035045	341.038674357328	1027.18724079275	758.169896090993	1096.42571795888	647.043213587169	737.870380009178	984.317649009793	1085.23031377375	1020.3610666562	452.304481405748	624.59569374886	1668.67110094893	1879.84917312153	1019.47739479005	1211.46007134739	1794.29250183036	565.904488443042	2014.86167685666	1357.44801327221	649.647572271469	1458.41258382134	943.149265114056	1620.96090543998	1389.24779394748	1030.19543683121	1726.10900985344	1594.34543288786	319.508143219538	836.240893856105	1655.96310157965	784.198622433975	788.765801282507	387.133211159737	765.330301563677
ENSG00000009413.15	344.912560199319	284.889364966439	385.892205653035	479.232151092628	318.625211122882	696.924207670291	218.125742580059	469.004866475512	494.093310202563	160.723986043701	411.275265828951	142.178798774871	96.6604765618346	106.075385084411	332.345538669219	142.148757326693	574.994330992153	416.441743979009	440.546465502316	298.894711204723	323.861073244436	378.194661132787	654.532980096185	383.339465029077	193.679522161313	234.432579260488	741.117491439458	810.487012104041	506.649712512356	512.987146002701	891.711616598173	217.348054300054	964.384867067628	661.5570272184	338.230513463734	721.081931403423	397.331395554789	688.56012505921	610.696238513823	351.263222556677	974.484858029712	785.387122840703	90.9952124598749	454.496860629338	869.476429284434	194.730349915718	354.930148664869	287.301556528171	387.995683571815
ENSG00000009694.13	146.121837717037	56.2229422940014	122	38.3846767637806	53.8054581113159	248.394061751216	86	180.751332724325	57.8979585817765	14	28	35	35.1968101583402	107.472087757918	107	12.9155524250161	177	31.0270921763452	236	38	148.891368577941	32.0268092950476	99.6517218196264	71	39	97.9323085659661	97	168.991378473263	86	203.676139130315	275.497710261281	52.2805908232961	203	102	94	220	58.7750264126508	51.2497315524874	198	84.3263349816829	259	127.514195274562	26.0980942095311	104.20381108127	72	86	84	13	106
ENSG00000009709.12	0	3	0	0	0	2	0	0	0	0	0	0	0	6	0	0	0	0	0	0	0	0	3	0	0	0	0	0	0	0	0	1	0	0	0	0	0	0	0	0	0	14	0	0	0	0	0	0	0
ENSG00000009724.17	64.3609718305337	32.0310571473072	76.4633208182027	64	77.4556446208503	105.592499212428	30.2891232164534	86.2144764292731	108.910733797709	24	65.0472783506403	14	19.3108737032191	20.4392003396626	54.3105603415368	14	121.978998944487	34.0576563288118	76.7074249399941	33.0834211776059	37	49.2467272282488	64.5212442976897	68.4023291663528	36.5314045981817	51	151.693408466286	135.111867432383	86.2762346340335	75.2078707958136	113.637388050849	19.2954015640663	128.52428844507	40.3751995335241	51.032902969602	118.835537159694	48.1034978584736	66.3146553971709	172.178240613837	25.2691933788299	162.677413894605	117.846738306254	17.0353124349929	94	88.2582241176431	16.0057572896904	73.1442047016199	22	66.4888781562728
ENSG00000009765.14	5.51105587606036	25.189636591016	10.9834039587914	12.504276745735	9.00131982181311	26.6913773646446	6.26059107067467	6.0852068958781	19.4971963978694	4.28431711287175	6.92942096305917	3.61510824432917	23.7541128723885	17.1779449507822	14.2515863597229	4.53270487005109	13.6834563705764	7.75780120278362	23.2204132739384	3.2866855190897	4.28416407054981	5.17277894373766	29.5718332067066	13.0827382735783	6.59573914207061	6.38633529006996	29.4116958139346	34.0056061879187	9.63336309653281	11.8678387179393	16.6878675865378	19.8558019643081	18.3495583212682	13.5474561265251	1.10807224892269	14.0891344783362	5.29102157971928	9.26061180686562	40.2540474031268	25.7826973681194	34.8796616990243	72.7395019637577	12.4295642261511	12.1286199832127	22.6770949593955	1.00062855048534	12.3748005692006	24.2483791400495	24.3900254746731
ENSG00000009780.15	235.109701158326	123.919561446871	158.656952775999	188.358120133997	252.297327535205	389.789798203123	148.28013202202	240.002088977134	367.803409315712	99.4407176740381	195.989051751948	111.281323081267	136.849093702478	91.6290517754367	278.154087057383	124.329892549829	321.273848856949	193.590477900085	284.590572091996	143.396448570096	215.137046031383	247.635791641259	273.259562779742	224.232961337566	115.019963029828	171.829338360261	464.325613875081	482.153902607713	360.248767915686	372.631592770695	381.016937378544	144.928888887987	508.653536174567	371.256717746692	262.965097826975	381.165113949938	272.386763053723	483.713037883431	482.962395465932	283.35635834419	547.253488243111	484.003420504611	170.102862839969	249.054218896294	455.764316679292	123.157594094434	241.283321678888	130.267656426014	228.907327111478
ENSG00000009790.15	5469.62443199627	2345.3833611581	3695.71090341843	3970.74532680476	4885.72469830643	6461.30437504658	3269.90993089988	4059.59042204804	6126.42759548626	1675.8645135244	3989.54143297141	2030.84323643176	2806.73137871939	1739.51216239071	5248.93773162929	2172.37483318605	5841.10083593495	3835.85085960143	4715.00730629457	3012.4148540583	3905.04791317949	5026.80385533557	5516.61418797746	5987.03149812238	2712.67840062119	3167.6032821837	8057.38257694307	7990.26036448326	6315.54415757391	5094.26353489157	8252.97639087181	2538.75381321162	9852.65052657062	6974.66625175738	4375.08087628396	8293.72036752618	5565.66029661634	9203.83697325501	10791.5286250731	6577.86921341674	10448.4816077241	8571.25581660477	1798.15891567163	5424.01296396043	8770.55803632729	2745.10102403155	3548.04977944845	2939.18008171422	4006.75036560326
ENSG00000009830.11	155.715130885371	68.3785646370411	110.557485206833	80.118970015244	129.407111349445	122.980101991035	83.1247361454666	113.09504166801	150.441262729919	39.4829168183151	87.163682970752	44.1863563029289	60.280401921297	47.7206517712829	149.915563509417	54.8794798906387	181.14244688409	69.6043940671672	134.796994205189	77	65.1530175995023	127.505279310564	163.738382654945	131.575626227312	58.5668082776992	75.8102379838548	224.984818438535	200.367498017	128.350281071124	121.330515442947	215.153360817202	69.9459737189619	210.157108150042	153.899555882798	89.9304054809669	168.234289589337	106.178260456171	188.378870000331	239.727126457423	132.254658681014	287.30899850612	225.731639566029	65.8828081296779	115.126999250028	232.403988128012	98.9937084405794	90.0131765293472	75.4021957855182	75.5308470869902
ENSG00000009844.16	421.002940122348	216.116262132346	355.007224803118	464.007626995363	497.254394951649	682.495049016078	310.058443625817	515.246759759142	549.273729430314	143.671714659092	361.01211900318	132.01061358111	203.124292654038	172.383620931533	386.035791011492	209.005651665308	699.032043077913	458.012710194741	691.018667748207	245.2028578929	456.026240146832	619.028533380284	540.158690800598	401.225685826358	221.013957761737	300.522940758533	854.02807249836	1033.53078181271	635.688696533935	567.026627128632	883.032108161434	255.262598169958	890.485461248056	766.045497180611	443.012337156362	751.312689333254	524.007753099969	789.142635174494	1014.02892866515	416.022640669621	833.242237919246	699.012291637606	140.214593269225	404.089703834886	670.135313377145	238.242158150199	442.079328989438	240.000577589233	354.003762260085
ENSG00000009950.16	6.13228507200346	9.31081261850506	3.23644133815181	2.19051366843659	18.6056170068111	7.10839174053213	6.03219456787395	5.14547306006982	11.6096691685008	2.30843160627304	5.18193039792624	2.15842123898684	20.1001421761653	19.471862163555	18.2389192010987	1.06605431971655	7.15740760907793	2.06876238745965	4.42555398629156	2.14378489129061	8.37958485369808	8.17640516329547	16.8622042627715	10.4234784982174	3.16667194915708	3.06147891667387	12.1923065527059	7.23730833181417	11.3122323089081	7.12911735333544	7.37151961158333	10.0790230868225	6.14718918205607	16.2586535492041	4.50405854935221	8.37744533301504	12.3141249274926	8.21787004076131	7.21249143311287	10.2771257925498	6.94670837173668	87.5651447992814	17.5766595961805	7.34697642154305	10.531276205746	3.00499179483891	12.245575140832	2.05729877962349	17.0462888461613
ENSG00000009954.11	1043	757	823	1254	1084	1615	706	1425	1314	609	1241	584	564	328	1060	519	1181	1068	1149	1064	886	1267	1764	1747	646	836	2096	2230	1542	1371	2698	868	3022	1878	920	1876	1473	1972	1804	1603	2767	2434.92130360619	467	1564	3267	915	1005	737	1332
ENSG00000010017.13	632.387535503135	373.881830460653	630.892772635627	681.578757631063	623.963961590975	984.149632129635	456.905986765553	701.233325102643	838.669930094214	305.574439353479	715.159891148784	226.532905907303	292.524069908962	278.479780166794	528.719815745382	239.830845527352	823.948826220947	600.560763075351	832.288034532105	427.746024842522	587.363479226787	705.662797078034	785.715314933438	664.737345495087	377.302335717119	468.040321420043	1161.05765966862	1258.35527376889	647.374305071433	792.038031920254	1283.08958800269	372.733667550075	1354.225158111	911.820428778093	557.644091087322	1069.86019928053	713.790500057629	1197.04963559499	1024.83858343721	605.247899419419	1362.71764786425	1002.90285657777	190.430816691889	620.26989584754	1103.15892795279	358.137916424803	486.737499779996	385.967391560979	569.831966978658
ENSG00000010030.14	120	28	126	32	83	1007	190	255	132	92	130	22	73	113	228	107	247	98	58	17	24	74	29	71	100	70	90	310	163	106	326	55	251	37	239	137	116	346	102	471	244	516	73	163	42	78	231	137	38
ENSG00000010072.16	147.887645901574	86.8700171448924	147.523473886121	188.292227266881	204.968626136702	313.901970593742	110.234038144169	199.511563851676	276.584569966985	69.3329166108583	184.058094853223	68.881830804649	67.1957335737147	55.270809564854	152.932825428231	57.4787911429918	210.843389217141	150.706630099642	206.515498629401	115.957593660592	153.699790446898	183.594738791451	202.679522272828	130.239625891285	85.4757605125527	122.06141553093	325.24299106345	326.93983782509	215.108444215838	189.461014197149	356.969798860098	112.493433637853	308.045389269119	228.949640823766	180.428429348221	271.691220728302	175.416411821967	350.088030907512	318.220569325711	151.397509525817	369.219376237849	212.912480663826	57.8389810293247	146.220908054737	241.805847304432	102.356525719268	216.821444137379	84	137.575076736104
ENSG00000010165.20	535	271	352	517	553	717	424	502	624	257	531	213	380	139	512	245	536	424	558	377	372	615	723	604	301	372	867	975	650	527	957	362	1203	768	582	840	601	1000	854	800	1020	908	224	588	1121	444	371	386	499
ENSG00000010219.13	101	62	81	70	96	103	45	80	118	32	63	64	91	22	109	64	114	78	114	56	63	143	111	119	58	85	152	144	189	98	178	66	198	235	96	150	121	255	261	130	192	195	47	129	235	51	89	106	62
ENSG00000010244.18	2593.83421644733	1573.32184388239	2395.8972948775	2536.59879872545	3547.92427889249	4676.99333114771	2121.93118431636	3255.78623916988	4140.591442833	1278.85936299891	2970.93242932665	1105.9017706496	1330.15977044939	992.132562755697	2810.96422330923	1047.20736514429	4114.66422617321	2313.07306269627	3904.974117938	2049.91762695106	2327.77510646652	3068.80232332953	2843.85897086059	3173.31647275523	1474.08042834822	2402.30089992334	5233.19332430726	5256.88763823351	3786.52776336152	3523.86955775129	5499.93768447333	1451.09004952181	5976.98748682191	3570.48934661526	2711.8005060637	4760.63961635908	2766.89364148371	4853.18111310925	5828.17927212868	2876.54153274801	6518.99864280273	4638.39961784586	1008.76854216694	3045.81739732572	4257.56583881719	1711.20389750778	2271.31744281091	1528.58215937028	2305.09973223119
ENSG00000010256.11	1591	836	995	1575	2158	2144	1617	1538	2029	953	1921	668	1906	732	1958	962	1685	991	1604	1112	1177	2140	1728	1767	951	1261	2446	2803	1888	1808	3040	1340	2672	2089	1491	2125	1678	3347	2284	3364	2406	2638	989	1713	2849	1892	1056	1389	1208
ENSG00000010270.13	398.811427065117	142.484849334808	252.137666619185	343.076217208935	501.138813288523	344.54669140604	275.086933319259	360.373830773531	586.128225117483	113.573602657085	609.40118783398	120.390263266719	161.503114025743	97.4051822212859	281.51961300306	159.331241727394	715.916475651306	238.107232072568	477.036516816473	158.377200936257	360.625583572221	494.136188821589	337.853260137302	214.57741480544	115.772356859629	328.80680578786	519.353091091695	528.925224266219	656.39695298452	376.963092621824	498.612943971681	166.142518494838	553.908099813742	555.770321460402	353.412739622905	475.730225978507	386.696537129369	1172.96051592581	936.181541262344	394.472504239769	525.441394314342	545.189276405747	136.286060675888	281.179178836558	401.39145997872	217	330.015057409275	122.262751653097	209.428789930083
ENSG00000010278.14	694	158	285	425	587	752	394	286	730	180	284	135	273	160	221	339	454	270	415	293	261	591	419	296	335	127	629	568	990	612	399	584	298	179	159	529	709	248	406	469	761	564	88	560	641	168	182	306	231
ENSG00000010282.15	0	1	2	2	0	2	2	1	1	3	4	1	5	9	3	1	6	1	1	1	0	0	2	2	0	0	2	0	3	0	2	1	0	2	0	1	3	9	0	1	9	1	0	2	4	2	5	0	0
ENSG00000010292.13	888.041135770974	631.179159953053	876.769583638392	1017.92382195985	810.91719934251	1291.82666946253	661.104138550068	1134.15716264476	1295.28149350352	567.231876260511	1138.08948320726	437.0321857577	570.246865081145	427.927574485921	982.82630822313	482.63585639675	911.286150190651	934.288718692292	856.901468513012	952.274553520757	790.688032777297	1325.81362438343	1368.94544696684	1662.12922288608	611.460988768372	495.365983442521	1424.01570797668	1859.40566337314	1205.17783389465	1124.15727584695	2262.15677679611	766.302673093218	2105.52737844425	1318.91583654276	848.593789002199	1541.80120037682	1132.36556191444	1698.33701545539	1035.64085875143	1455.14491576934	2267.99064531456	2318.09172988637	338.48221163859	1331.65673501618	2274.22653674713	824.610210958198	641.590122934038	945.058182856272	946.1301454891
ENSG00000010295.19	1585.52850763139	869.869675711022	974.5549276099	1332.57656801704	1881.28268286778	1802.49514060225	1157.984420491	1171.05374797065	2322.14654657911	547.324805629237	2057.97727372397	593.830367549507	935.904235965436	489.91514397766	1578.90130131045	597.448253905286	1760.28011266823	732.024808014463	1615.08294562139	846.930681743408	963.876399218443	1392.0088093542	1485.63932654771	1390.19027195296	629.830938191303	994.312964959958	2652.62072027143	2366.83533356502	1606.69405169112	1656.40907992908	2400.48567754535	784.97488102051	2760.34707221472	1496.00834661867	1124.95293285987	2052.11108797697	1399.45153644484	3078.35083657407	2573.36982342674	1758.42762829331	2424.65018351401	2196.26952173099	387.582995878956	1713.87174824534	2255.38025198708	1175.16176910884	968.0118788697	814	944.062826479377
ENSG00000010310.9	128.168336356718	57.9162538327987	50.4812948849744	46.9041467537223	123.173407573515	96.5024552310194	74.3839566200343	72.7579705568213	109.879711689506	37.7134674061206	63.3041963608485	42.6862575505237	55.9347197948834	36.2358214683009	90.246959112542	25.1869643981937	125.898804774705	88.8289461217279	78.0523884279869	52.7428311328867	42.291787619362	44.8132259638162	77.9433346718517	181.603658551481	41.901854909764	55.1087043880737	167.528578289625	119.475358953608	120.537029845129	103.783380383713	114.642287098014	66.7115237214701	204.810116023208	93.2836389323258	53.3907342287482	147.623126193663	109.972094652003	141.346163080087	257.770309504754	136.150556502955	154.490341300769	166.533073222725	44.0236699514214	132.123944683234	106.269251525178	54.4275470509021	58.8232851729403	65.5681806466403	117.528237157538
ENSG00000010318.21	48	28.0385421620836	50	38.0247056912357	80	79	51	58.0169740242019	74.2815063188839	25.0906284323298	46.029683745128	24	35.3777855596978	19	83.0562520527362	37	80.2088356486731	61.0133600650901	70.008328628924	45.066315908267	46.3173293340914	48.119253696591	71.0195290579907	56	27.2103021508374	51	121.14471826425	121.182841430128	93	84.0119057200692	87.0497623238179	36.040990575408	137.041179153865	84.1337872412691	65	130.298388279991	71	92.562818697482	135.245172178156	96	121.060273198129	80.2408759318552	32	88.9377633398043	126.033978954901	53	30	65.0882921978653	85
ENSG00000010319.7	17	17	2	18	17	7	14	18	19	5	3	5	10	5	13	9	13	17	9	4	13	17	38	24	9	5	36	26	25	11	38	10	44	22	4	22	17	13	48	56	21	32	6	25	52	2	22	27	12
ENSG00000010322.16	2407	1333	1714	1996.01299866506	2416.04477388283	2823.23258314946	1741.13172848294	2175	2918.02902631022	1080	2352.02985601384	992	1373.02387739827	779.045421159851	2478	838	2981.09119276791	1484.01281353987	2209.21252149526	1542.00162801022	1306	2111.07638451977	2672.28134276856	2558	1182	1400.00700252125	4006	3472	2391.16117405189	2536.34072871993	4155	1271.15156674135	4630.16697999035	2605.36440912573	1720	3367.07341189352	2268	3862.06609188617	3849.10418533014	2919.58342180119	4646.66432489094	3504.14167167016	660.524674333101	2632.45657565793	3942.09760089406	1470.05339805645	1585	1157	1902.04092114085
ENSG00000010327.10	2605	1936	1093	2224	3802	2280	1293	1824	3236	886	4421	743	2237	765	2437	901	2261	723	2576	793	1550	2681	2535	1826	833	1532	4249	3503	1902	2615	4248	1045	3817	2261	1070	1975	1532	5739	3233	3066	2505	2915	665	2342	3074	2053	1084	1722	710
ENSG00000010361.14	403.025252460021	232.340706153251	261.898523006171	392.146066273499	491.978160905679	482.612122835766	362.853552717122	290.772044469183	536.754547419439	225.23245312445	486.610769818374	148.606103113782	341.135966682688	360.551457213255	518.909062033176	209.579770324008	499.363258299306	395.253364560468	296.81150047117	337.732924254795	412.899032925198	309.552382624718	483.711627287337	262.158336606971	263.140940717705	367.033416639279	774.846782152662	700.492295659342	472.930417113567	453.660367957444	591.282222756694	396.154206463696	752.188330013052	324.983279353891	398.345319247623	440.503293183637	376.425365272502	824.875045287863	472.301486496118	509.111818229255	799.30522882686	520.338200884219	236.3866607257	440.586397941807	675.582225085983	339.334199284827	223.6913447289	281.915155122988	276.751701954876
ENSG00000010379.16	0	1	2	7	0	10	7	4	3	2	9	0	6	10	6	2	9	0	2	10	1	6	8	4	0	0	2	15	4	4	8	1	14	5	6	5	3	13	3	4	3	15	2	2	3	4	0	9	0
ENSG00000010404.18	5492.19606460897	3503.36815785293	5166.11503675628	6884.83991729321	6924.95119043057	9200.9410549845	4437.42223851049	4941.7546559408	6841.91818406624	3456.20658513818	8984.90250942601	1502.2022927812	3145.78225351147	4561.47202861921	4177.34418161368	2687.7504954091	8446.46539282241	5652.65736308945	5874.0913056767	5310.10822781656	7485.25802475715	4385.07964853156	7574.32256655807	5062.61232837263	3509.41234353358	4400.34555914086	10377.4915775701	9366.84837914929	6290.55067368007	7678.50063517136	9521.66624772912	4832.16237723392	9446.18148527389	4381.77591214058	5426.96135163905	7827.04235824546	4890.84845349211	11073.9420237263	5766.46703470624	6196.44637732685	12965.1364911717	6772.57368692265	1757.04365694348	4662.85262452165	9528.97044942033	3914.56546254319	2903.23770445077	3087.48317369748	4079.54956239233
ENSG00000010438.16	1	2	6	1	3	8	0	0	0	2	2	2	5	12	3	0	3	1	4	1	1	1	2	1	2	0	8	17	4	1	3	4	2	0	0	5	0	4	2	5	6	2	3	1	3	1	0	2	0
ENSG00000010539.11	481.601423477154	286.73121734049	526.775774780361	571.048481654144	806.930850728554	1351.71226669766	596.529671415478	627.438893066734	901.52231172939	222.046203053324	691.153879621488	137.818427880119	358.417820657767	390.524371783715	536.529841582182	264.677867041984	861.070815309782	498.240589659754	583.374033549588	432.488997266266	642.333943165602	546.133828718865	630.068728906163	434.225745051427	340.356691235527	391.309082826298	938.492719378799	1003.67176390817	867.466066780462	1302.92450057316	928.294522718716	323.86806160988	1034.40897468728	477.242436877933	473.335849691608	848.272952933729	481.864932620785	1160.18820956167	791.768906440335	740.957060666605	1431.24038370192	995.204711565978	221.316512377831	765.518860252485	831.772921221884	432.203890353731	473.024677920957	300.12519495828	506.068828304546
ENSG00000010610.10	4385	3314	3313	4910	4324	6254.00999178062	3455	4058	5148	2625	5629	1408	4009	980	5302	2474	3929.00972513414	2887	4327.00583200344	3052	3249	5961	6288	6758	2923	3127	6798	8895	4657	4286.0137515523	10261	3549	8331.00900086549	4307.00238672417	3554	6618	4764.00396916548	7714	4885	8468.00488733464	7660	7996	2109	4565	10342	4549	3123	3376	3215
ENSG00000010626.15	49.2474630085376	14	49.0168226605798	46.9709490181005	76.9093979437901	109.902681445712	58.4893965558437	54.0808212832519	68.3768653353257	28.7647444045643	69.2736790195351	20.7993150738728	29.9665638047059	20.4777164865133	76.046380758105	20.1663297836425	41.2867326187767	28	53.6248170877975	50.8070158163635	29	72.7975953480046	79.1591715828116	41.8713308476337	37.22741107839	62.329907805807	120.835493150947	123.724600083164	55.8970692464001	45.2805877840183	108.862825696952	44.6116795730641	134.53618659078	63.6636890930206	37.265872655699	110.493949880085	59.8262530629586	144.095705000412	137.975044920555	81.0770471161794	178.214260125589	91.231947388137	61.3449865076215	77.2829361622254	95.3285896287298	82	55.9057371054337	48	42.3330134333721
ENSG00000010671.15	1849	907	1513	1621	1961	2430	1140	1490	2286	712	2341	468	1088	572	1071	588	2325	1198	1713	1058	1316	2561	1787	1368	921	1359	3235	2752	2578	2001	3002	998	2768	1748	1316	2092	1252	3649	2315	2254	2876	2777	552	1951	2983	1333	1240	1024	1166
ENSG00000010704.18	170.706187012348	112.585020740866	115.679658602444	170.045887484132	294.873240822409	298.95900796803	136.699267265403	138.769123847398	242.854311491929	70.4244747615935	247.779762935808	62.3175960622586	120.038610047019	80.4797302082777	187.61729993342	82.7790179000464	235.914908501867	126.94271669209	237.506109360197	117.232285366657	167.3547812106	157.420993262122	193.132201391312	167.652991009221	132.575245298557	151.313572654048	363.890000916654	361.883132432002	227.61756722026	210.618463331394	315.86697787693	99.5623500858189	354.598941111439	183.344336759074	195.657586068179	241.903542982955	181.845712318747	349.560683442938	359.593646445218	235.43756347813	337.825129402182	349.813215731771	86.2006737823806	170.76786668589	295.4058237033	156.72921923259	95.0056391736864	143.993361007678	109.594175327555
ENSG00000010803.16	203.772020327946	114.804691436887	124.774890177768	174.919624275095	186.583372561404	218.596957463645	120.809685762593	202.492774520886	205.353315873917	96	121.739071496268	54.6170687416027	78	36	214.526038895207	64.8920411145878	175.259569780316	137.725280477033	170.727651315946	138.722002167109	96.8507972491816	173.61709266021	228.636411336119	246.718570095246	75.6417170070218	80.6258436648787	277.926572638181	269.72333445407	230.90703994058	197.915650826521	325.948126398784	135.883946937852	397.198698021047	249	113.85056876527	343.106264389506	201.794072507209	264.179619934654	407.490207371703	265.694700553724	339.547086515236	252.67567990669	77.6853676282	225.752929787331	377.777892909839	109	144.530179557232	150.308082025813	160.957684558166
ENSG00000010810.17	2946	2019.05333009123	2153	2726.13138442455	3357	3988	2170	3132.04732100157	3697.01467382323	1704	2980	1712	1893	713	3426	1592	3008	2625	3134	2442	2277	2443.00943245099	3873.04221269855	4275	1806.0226812814	2012	4840.04278374828	5679	3350	3657	6278.87558256222	2329.39029878436	6842	5971	2415	5127.89494815898	3932.89872076984	6283	5740	4597	6276.78423170793	4944.48431886502	1674	3842	6242.01912624744	2512	2162	2264	3344
ENSG00000010818.10	746	574.017902121141	803.574297503854	1204.97255901172	664.684894437074	2054	556.446235968024	1402	954.450344322371	517.715272732889	1009.95815112859	265	281	274.303348257913	602	279.025556085724	1095.63406611203	1072.12071404192	938	716	943.460824038687	962.465107229189	1415.42224013391	1052.60723646393	589.310448207366	608.218942739209	1443.80419193169	2109.16506153475	1050	983	2057.00000005277	626.665866625604	2330	1074.99373061343	578	1326	786	953.055844569205	892.762661901685	995.135664893092	2972.8177940645	1697.6107341083	250.963348838706	1030	2460.69859672743	450.862223255913	764	577	1022.91421614062
ENSG00000010932.17	1	9.29163265971918	0	0	3	0	0	0	0	0	0	0	5.07284029081661	7	1.00025020827818	1.00054289435103	0	1	0	1	3	3	8.10514204650546	3	0	0	4	6	1.00010151963777	1	3	6	10.0010907397198	1.00009444560592	3	1	0	1	2.00013606865056	0	2	18.0041242959454	3	0	4	0	7	0	6
ENSG00000011007.12	585.341290068033	456.225981928864	474.462009782145	652.972648415883	544.272121901511	891.951494364652	504.883240364543	640.058583636007	789.389592703096	304.625951085581	849.12663205868	279.934554257054	333.102442859574	177.708780375883	645.998870935981	348.357373342959	781.254426927358	499.355368092057	720.964294872354	529.608472349005	559.833641157912	908.047188149224	923.689071641892	805.423164274073	365.630588407053	419.055250967045	1062.70963869984	1056.2664087148	735.718326743088	653.958180878668	1369.82992144041	431.338952105395	1432.73965839051	1131.88662115911	538.544405524059	1084.31454726643	794.38963962292	1281.59926309358	1081.31517595383	956.311224082615	1340.86163596182	1158.37704250593	251.655194622476	703.601526564417	1358.929581344	604.486096463296	402.592016653588	587.467319030764	696.253968253968
ENSG00000011009.11	1345	732	880	1299	1586	1615.12696783897	1233	1060	1801	718	1691.69617438713	448.651444470478	1443	659	1495	646	1387	932	1138	956	978	1392	1392	1420	788	860.593767312759	2191	1980	1360	1396.633615363	2187	977	2027	1353	1111	1792.71040216741	1264	2336	1790	2330	1995	1914.12285315811	615	1555	2079	1400	701	1073	803
ENSG00000011021.23	393.009643183043	227.966064836734	310.001686331456	301.158044332961	466.036607244037	683.253324743161	318.946470890024	415.456613466436	447.719724126972	153.074233807232	359.223925728844	197.737281644037	174.942920415062	113.897484466777	444.123861204815	122.671953914873	573.553855154835	224.718481471093	410.179918490473	241.848247006749	272.87571894171	604.624078763339	430.278967705416	512.815429062841	188.666114469367	252.536440804008	626.311494883161	684.679445316611	511.34624401522	436.676780950227	775.430234653165	217.969706711943	947.429090796503	498.704196800683	327.470209901706	609.401403745642	421.965297598805	676.999021236995	745.17954958617	409.41454671185	889.68406398935	652.709150330344	114.003666002029	442.731205402123	642.884517099668	238.337794774356	387	178.73044562525	251.495207450141
ENSG00000011028.14	227	216	324	209.798407956125	329	174.780491387712	297	411.970323536687	336	503	166.469135699615	322	326	30	405	608	148	360	160	303	256	242	276	303	194	408	254	413	342	314	396	680	134.96883741551	329	318	388.994788375685	757.799037683445	145.788431898291	223	390	142	226.71507010624	464	453	382.837250462839	157	243	223	174
ENSG00000011052.21	71.7591457894882	12.1897498910451	41.6629199620828	47.9503923886359	43.2767021937786	0	62.9200896956369	28.8763757756739	30.7682530909237	23.9430473926607	5.78699606024943	16.8356527872924	24.3130812814401	16.8471430041641	44.22632657831	54.0202273977921	20.8319197332899	65.3115650233485	33.68694737993	30.9550938688337	37.3218197485646	47.5877152167631	72.9691234187655	80.687801749489	35.1209299370751	53.7592066311283	85.4621518150681	147.716514549547	4.58480550953059	45.5833783086245	21.6426782122977	3.17534779632366	46.4675016497615	33.4064017169177	194.24792325665	118.5356509921	54.0948299239936	193.211081154462	135.704098217074	41.0312916086355	67.4490431725789	117.615886288994	31.9686890902515	71.0614863564848	62.2800132755399	49.0377301481645	169.225203621653	115.584088809714	48.5446175359632
ENSG00000011083.9	0	2	0	0	0	0	0	0	0	0	0	0	0	3.39049152253735	0	0	0	0	0	0	0	0	2	0	0	0	0	0	0	0	0	4	0	0	0	0	0	0	0	0	0	5	1	0	0	0	0	0	0
ENSG00000011105.14	94	76	65	166	126	59	225	134	59	161	115	108	116	189	58	46	62	45	79	57	96	31	49	112	63	25	148	55	200	99	120	142	89	86	78	58	90	53	28	102	103	99	76	103	198	33	60	22	97
ENSG00000011114.15	349.644299250972	219.960763609225	288.380613510244	447.648828431618	479.480246559755	519.801530116867	280.288634747615	461.486317299869	577.295969067324	193.968135526219	425.280977507836	148.029949216486	196.747848665332	172.229948214061	348.060170344293	142.69601177479	503.225049275318	339.989808172959	526.634373715731	322.8175538546	354.744117910896	400.104526876615	480.044161850527	453.983242118112	212.836160782849	379.570232914999	816.606360900007	743.426426191567	485.367832135468	454.443832560854	812.166046301381	245.239273330926	891.974197197074	478.993990665829	310.15447959356	651.598649219067	385.951243307103	642.05432355241	633.296103356224	394.081855799257	744.884678791718	767.541661122279	167.919218462337	380.324048864939	787.970403881098	248.274761414666	337.914096901929	194.053513340102	292.706797499089
ENSG00000011132.12	525.757033640584	306.177659458375	468.864062042879	533.063551991147	737.00450209643	825.760071164568	526.699159943237	566.646453019795	766.826618481103	300.033914632459	711.339682184691	229.265049501481	445.028620170337	242.852828747592	711.186561765156	253.963931063106	734.6457887925	452.784515700402	459.882763345736	463.915942770897	367.378294244119	743.481275554611	738.59823035893	639.759694159077	377.386772755884	426.933128859031	1120.26275480496	946.352750268019	657.881036227544	641.381968733917	1015.89399117844	371.30218995135	1143.19551808313	634.56043539212	514.645772007631	763.025572898409	574.554417469949	1058.00075490864	854.943834145187	681.693774321362	1150.77012421108	883.749194789293	221.84445368374	719.428902149569	969.817333806122	426.366289092343	396.691918288001	379.059718253099	483.682826228227
ENSG00000011143.16	86	56	97	93.9460153569978	137	168	76	128.991400951033	140	55	82.9384911758093	75	66	51	94	43	123	69	110	77.9838213841265	74	127	142.934522784538	137	55	85	194.868871457937	245.879055541427	135	156.812384405626	192.984077615786	81.9423758659217	212.925576682985	178	122	208	109	187.918052658352	244	145	240	229.66371471488	35	138	266.996059949785	85.4789051204875	102	113	98
ENSG00000011198.10	1814.20528737634	1023.16175043889	1635.33908786557	2052.99803213703	2539.41769427198	3128.40716367659	1432.79504702124	1555.08677564437	3523.84122549176	1100.59941390197	3195.50207161727	354.539885870648	1128.21327070815	2213.11897101892	1461.45732400107	881.408436902715	2593.66916788584	1231.3135505077	1699.43185517405	1397.97628188249	2768.39715067207	1218.96435767234	1937.55139448701	1085.99335155332	1302.06542823138	1109.235528627	4030.57882530195	2720.34085636728	1555.77954661707	3257.35482532181	2349.74178554088	1392.98723054568	2711.21395764202	955.083308176828	1662.74871703132	2259.16822832187	1436.204424209	4154.73488253938	1579.2151120628	1576.86036033933	3892.082895407	2561.27623899423	427.41822145047	1753.86280147727	2297.51135014478	1630.4579535795	932.057437205838	690.76113215048	1057
ENSG00000011201.12	8	10	13	43.7217495163988	12	25	5	7	20	8	17	4	4	5	0	8	4	2	36.6039144218359	1	10	13	16	3	2	10	30	28	28	28	25	5.20358203794153	23	35	7	5	13	18	1	12	31	18	11	12	39	5	13	0	14
ENSG00000011243.18	1521.72018274865	923.108027408997	1242.14140770576	1382.0453029956	1584.5102645431	1620.69209491667	1157.56496188862	1242.55046707847	1909.7987613667	801.578370237736	1729.09349880745	687.500990396287	1415.83850436558	828.947291288442	1835.84811030878	859.01162411757	1658.83052058324	1062.44170780225	1110.92047980241	1248.68782199311	1083.93763328036	1493.55769529475	1606.91668215524	1675.97405236286	884.715446825161	1147.28874571184	2411.80785872485	2174.72601995453	1922.07092818384	1601.08411080274	2509.60358452418	1140.50950459443	2556.70387425176	1541.26668692215	1344.77928258125	1955.51910209428	1502.37320952714	2688.03443946139	1956.92771593696	2382.025551514	2544.7306257482	2172.69592317775	764.907274790804	2173.72558314754	2552.27033524687	1419.67231396881	1049.53281517974	923.078112841387	1097.80497277741
ENSG00000011258.16	424.222826387282	238.156815164023	413.057367416455	485.672155416317	638.202900165408	685.001984491384	302.001995428458	546.465964262189	604.573046764885	157.004329607937	495.068224160173	145.139976597709	153.250291688066	139.601565384569	322.438359491578	135.369648485394	712.577612199761	397.85642344744	725.465302435346	258.508641111792	473.248767795864	523.809518785101	599.998754608816	396.319190195742	196.290377768136	454.529097547278	963.861101475168	967.228468444527	709.153367247341	590.359385503225	807.72364170509	219.84628890068	971.147376447134	648.204383567548	406.021750240275	692.48643380442	463.036670857828	769.321712811954	842.527415283869	331.918044622161	1048.61589875532	699.307268894895	132.031409988624	363.838918027956	787.672722449724	192.240564047054	386.054881740727	237	432.60510092563
ENSG00000011260.14	519	182.969471238683	291	390.993200052759	571.954623353609	607.916794081325	358	477.97623472446	687.976977308499	169.940310086797	422	199.980474876879	263.961750230475	116	538.923969196498	226	694.966413314452	420.99079992631	731	267	379.959104373903	580.982128728433	531.985110151434	481.967130923243	325.992071357457	388	924.972536178491	1053	847.983059557701	584.991015848301	855.931062398051	280	1013.94905906036	929.941877830299	538.995263093511	817.918050524935	643.993922455737	1065.97664917273	1283.95725698565	651.993846749131	976.946748986001	722.974069203653	238	529.942886004839	896.992565735832	367	400	370.98864110637	458
ENSG00000011275.18	1830.95413411608	1101.58194402168	1425.10335775946	1794.18865237281	1932.41275600387	2314.73231821852	1399.82485743339	1643.14825713923	2773.28457212718	1028.68050963491	1995.23734724158	671.686349908795	1059.32559636375	595.990423057678	1954.67120851613	762.127250644881	2009.20572561002	1334.38016112872	1640.25237151577	1206.69104442501	1281.15238014286	1935.61010212482	2190.03273965661	2032.97653814666	1047.84745906666	1073.99949115522	3220.53031358169	2888.54327070812	2227.99473434046	2001.91092963118	3416.34461576629	1322.69083769799	3218.61056241832	2005.66755504031	1569.42747758998	2810.4555652859	1715.86876458811	2833.55232280726	2897.13938973888	2166.67480030538	3341.31382387629	3081.41452056327	686.117235970017	1896.62035480367	3418.16488473334	1376.57111298663	1474.33225003924	1130.46689922893	1517.49271867388
ENSG00000011295.16	372.886409700354	198.662673174332	293.17701388045	301.773293652874	397.671045015031	596.258792295795	163.367997853458	329.427954300671	514.038085954995	127.929729456255	308.577808827131	165.117603542913	220.372084885394	127.468512686418	374.170277945071	152.486717342876	473.551498984735	328.70986608106	484.316372303597	259.581498115137	295.824278397119	409.37767672449	464.704225167525	374.186944434669	200.282328498642	257.45739536987	700.60795320297	639.171552029805	568.458409529041	488.305159143141	606.074116307195	201.830315444794	889.674378701834	633.06641549207	370.863059666364	692.08581901128	423.786764438886	679.419669933328	801.717356647771	589.380439017095	879.358546990076	698.420895431481	226.632094791069	352.777985942185	628.183537794641	193.57482518285	295.061788728503	264.136438982665	312.896645953437
ENSG00000011304.20	2627	1877	2411	3203	2589	3834	1992	3200.99811686656	3427	1515	3235	1100	1547	845	2808	1316	2776	2242.99470436776	2672.99622772163	2441	2165	3228	3787	3935	1665	1772	4409.99721423585	5278	3313	3201.99829831567	6045	2076	5842.97403051297	3738	2458	4226	3235	4615	3729	4042.99856381215	5874	4993	937	3647	6133.99547221799	2400	2144	2112	2560
ENSG00000011332.19	1.4885828663045	7.32423895523487	8.13709431246309	1.02667701361077	8.44147996220116	11.0364962124859	5.06146301655964	9.40209755012691	8.3373185585336	7.13678196324791	13.3557761923567	1.00606287619832	17.2112507470546	20.8688069121211	13.5629319446997	4.0027253927323	15.6141909500028	3.09401360265484	9.04624562394245	8.01822216372232	7.04582308103649	3.14182855449236	20.9659262335418	6.28953421660138	1.12601424586009	4.07980999726256	18.306676579965	14.0844647291721	2.01654962955619	6.21192157442958	9.42088492274321	13.3737765844801	14.3443636626348	6.12664708295639	0	9.2745468612604	5.16116479423145	13.7149680236811	6.14200786920123	5.24121228836511	6.20273872411116	40.7617821217296	10.7378738183657	6.1332200896332	6.05753539827054	5.03113946530624	2	0	2
ENSG00000011347.9	2	1	2	1	0	1	0	0	0	0	0	0	4	6	2	0	0	1	0	0	1	0	11	2	2	0	0	0	0	0	3	3	1	0	2	1	0	1	1	2	0	37	3	0	3	0	0	0	0
ENSG00000011376.12	169.879065057425	137.586826456459	146.836672375551	208.955967922239	199.223792371643	343.142883195527	175.106772561281	250.388356199314	263.417435270025	108.704246831938	186.19241281902	100.963889917384	116.008912675804	66.5165993104355	192.513817716934	91.573931457876	193.042064288938	174.411590292301	199.082414858214	162.030527322703	141.391494134152	238.630176121251	312.178583104911	250.876414504024	127.717347280208	131.569247505244	346.017827031329	355.869675359723	272.604616753169	257.020429165962	409.032862974987	141.888790056004	443.841702449682	227.157260097304	141.573896375777	287.318098581549	258.817751364895	318.730139618002	375.156333915766	299.944305109342	511.049658476575	424.411290795737	89.6917377209794	296.567101283963	458.416950383317	191.000000012711	215.887511757755	124.033463058052	199.070950446785
ENSG00000011405.13	318.470349413082	230.934520905497	368.743293137385	404.705183246245	493.561298677922	881.774493840592	187.434830917087	564.074208329078	637.658291554422	155.615481288963	425.880317022577	159.243090533274	93.4548513031523	92.1692997192285	309.635152100754	97.8034053965531	635.631825636493	378.259193712717	573.115722262755	267.465630603458	390.290046302912	418.34105783452	586.232402285483	398.992489928959	188.248052745827	304.14724373108	722.798534501617	935.709559691898	677.265696047756	655.300478498034	787.445417395239	171.776518314545	1111.66484112438	615.160475249023	312.808987749856	707.015186819724	457.965483502365	721.978450708138	882.416344068391	245.153626902116	1117.94071395363	770.523790985051	114.408174364935	440.75824292799	614.555805852212	179.650145058668	395.021044520073	136.246432717118	380.321486522876
ENSG00000011422.12	2238.01280351235	1302.97727449278	1734.44886659189	1887.11525787241	2511.23894155527	3828.44336251857	1804.34424803308	1477.66691506395	2863.69059530645	1038.89941423545	2875.82832720917	344.483124877272	1990.49812295427	1592.38450341041	2147.99781780751	847.041372334698	2796.49236277764	1515.58609369649	1795.90559820912	1332.96068131346	2058.23735080371	2386.78100327266	1841.7537905308	1314.16711135194	1083.80337401544	1166.08946331829	3113.57038570475	2984.07963551891	1518.25541919916	2187.84062752256	3027.83113592324	1384.19258654509	2098.61191503035	752.942867936937	1489.4004705762	2151.93726426531	931.540443884742	3582.92333485533	1360.64170937743	2947.58068558743	2432.15285432552	2757.82615971945	422.488944638698	1550.27986064693	1841.38493388522	1581	1076.01093152654	1116	793
ENSG00000011426.11	7	9	28	15	7	13	17	14	14	3	9	5	3	7	8	5	12	13	20	5	11	20	25.1918676296733	8	5	4	11	21	17	6	22	1	21	12	17	21	9	19	14.216489659655	14	26	85	5	26	15	16	9	0	8
ENSG00000011451.19	572.718299222821	431.421717179727	525.407101517642	523.075482034367	625.550614944544	876.094927770114	442.354173225752	620.113594919496	752.037586132097	337.00279039388	646.11270968191	286	341.319994957406	277.772924772285	712.215360376417	337.03063009967	708.735016219605	397.415866847047	610.51736095493	431.711770271521	482.427799359555	732.873623334481	731.417080826765	813.614602072984	335.035604891957	369.0125878413	815.044759674923	894.306539941139	550	638.109836622325	1105.03040542467	403	1209.70386323231	709.058618530506	480.172262483845	834.114536748817	654.168542239926	1013.24526618546	846.572479416145	689.41345228572	962.22939108267	998.270987342442	188.242021634755	888.702166361109	1084.87723653674	430.259981430634	400.978133361102	278	484
ENSG00000011454.17	441.815067597468	346.964142850168	461.02998200795	597.252630618104	548.583174453453	858.714848681343	289.635310748145	620.316420893448	685.238041425404	236.011778709093	643.451436103272	182	295.887444193797	168.274655603461	407.13724981836	202	695.31714237681	471.347428710736	593.390878508517	388.639294399598	447.263135510375	567.413400099933	742.78961110911	571.830498365466	249	360.197102438741	862.196821952319	1024.61596442581	655.582214487789	690.685350753567	1081.44904078246	296.117445075243	1209.76793013237	695.351316341047	444.72477144791	811.979623445947	566.147104289065	942.139789334362	801.702140218114	653.338086058567	1364.17992000602	901.31724354832	143.547060970143	565	1109.96646343015	361.151526769687	466.182859798038	323.016028848517	462.284688170436
ENSG00000011465.17	6.45947678165101	7.57390952106723	12.4271647272179	0	0	1	3.12019979093348	1	6.34174789216689	1	7.89622168543759	0	9.31072036044968	10.8555952485365	13.4021502282363	2	6.34675710276683	1	5.1424324855207	1.12182470832946	6.36584715302683	5.67803596951666	9.63651760318547	3.14469543347967	4.24491181696204	6.4893104197546	4.53448552987882	4.17433051627885	1.04530657075416	2.05038809864076	4.65398594812177	4.0035263503289	8.23740942297636	0	1.12401113842428	9.58985693684054	1	26.3096274402419	2.07273589432023	3.1623810646288	4.06813015785425	55.3960437230761	1	4.39603350233093	6.13793247345606	6.44317917925906	0	0	3.00826243605114
ENSG00000011478.12	92.5868085719303	65.2981072979362	85.2495625644795	98.7253321685278	99.1477975352611	112.536193957967	93.2344346424675	113.310262689174	162.482383212585	60.328827015565	64.0057349575875	48.283806682074	99.6750960917949	45.275915027736	159.753984427006	37.2572933484782	95.2583937956347	78.4283739003559	110.941966732798	72.6176361080253	78.3609014363108	125.133597580624	129.923376596792	151.881700828302	59.7616401589193	71.9409818439009	152.017185302521	184.334672201701	144.462440449019	72.526572859278	152.602794597129	67.838287891233	241.623414232577	119.675925238382	128.313103701406	195.239077822997	99.0181354069455	168.004320033665	206.298870622774	164.921356910222	171.433140601747	249.950135244104	60.7353131573063	118.474307001991	281.919063325031	85.3760597408367	72.4757578257616	104.413546414121	106.964341149651
ENSG00000011485.15	552.035555094518	366.582618790852	359.108082999331	412.476283521376	631.148606047469	772.5239197033	375.878010611908	503.964974431862	734.381027746276	260.610078019816	376.790893282944	278.300425073799	322.27099887957	133.79360811957	636.585509807202	189.185613826212	403.535098799227	282.052257270081	577.686888833068	424.935621682261	297.456865004447	545.337535093563	431.748316922183	770.545041411861	260.404070542315	324.277703677131	686.838690779819	659.68016765599	550.166137134828	694.72841604237	1013.49687443109	328.718066214229	760.406093618081	730.517613805996	386.647327437529	953.754905047538	509.406120141554	787.09390272295	1050.64154193185	721.542159962186	1044.01130001837	1028.81569322314	223.160689936545	759.099114467718	960.295721871503	346.306130369136	273.207243325673	431.093125045517	405.184870996883
ENSG00000011523.14	441.402956874423	255.650215788462	357.175458318097	418.647203732955	486.566160168414	829.994712409609	216.734985147054	473.237832892878	560.097741949731	194.361347754368	386.61370403298	165.604884738526	166.542207635207	103.407941206178	440.122483691332	160.608212497477	694.235811533476	372.315209262667	495.090555994447	310.092594216234	341.558508611502	453.340474088396	705.358535378253	510.357633507743	279.074793459814	303.529967506825	800.933819791609	917.876299020898	543.355866666161	498.260028049878	913.369637797118	231.013623578701	1095.47755102152	626.887278962484	406.139228796269	737.813509378491	449.676315077542	619.526131414769	869.648925639357	429.105210754308	1220.24763876245	761.423815316525	140.624231616463	426.654204261649	938.723976734243	139.308810182909	369.378965349633	272.434286297241	426.160347276686
ENSG00000011566.15	96	34	55	69	75	150	31	107	95	22	64	33	6	14	57	19	136	67	124	50	77	93	87	76	26	73	149	216	109	106	138	25	219	155	75	149	93	145	255	63	167	136	26	83	134	24	67	50	98
ENSG00000011590.14	25	26	45	52	28	42	42	41	56	27	27	28	12	11	49	8	99	54	17	33	38	49	32	53	53	32	48	71	68	70	49	18	106	103	47	76	44	91	103	75	65	155	46	125	116	23	37	42	65
ENSG00000011600.11	11379	4843	6702	9393	18597	16860	12275	7365	17201	5237	16530	2565	13341	9632	13164	4423	14488	6074	10254	6275	10180	8777	8934	6889	6769	7798	18009	15372	10751	10830	14036	6977	11881	5859	9753	11943	6267	22103	12139	15537	14102	12895	3945	7095	10672	10249	4991	6829	4785
ENSG00000011638.10	223.069997215772	100.374242299491	130.617424972088	189.210454728987	217.762264949602	380.797614773845	149.791824110695	135.543985181313	230.863412345302	79.2230572865123	239.948305279373	100.759875439453	119.56432800046	83.0166843305191	225.392474639772	92.8244018354158	234.813755523717	142.135866006109	217.098018802802	126.276368846974	133.441508441672	251.722168188871	253.802215307967	161.466033793959	101.314117892492	155.384264025527	288.690295549605	351.259660512353	284.090164919885	233.257152024268	300.575360865615	145.314775334356	336.038104104165	263.829435568742	181.361198970631	354.889820760491	191.666774145427	400.149559985487	310.395043278119	256.694652666237	418.710131713229	342.395459889976	123.746592564873	156.021827805339	430.051745013541	165.20363050795	120.251612897008	157.675355512381	140.802300785542
ENSG00000011677.13	0	2	0	0	0	0	1	0	0	0	0	0	0	5	0	0	0	0	0	0	0	0	1	0	0	0	0	0	0	0	0	1	0	0	0	0	0	0	0	0	0	8	1	0	0	0	0	0	0
ENSG00000012048.22	128.911609273171	129.421602667665	177.832631903615	169.343390999595	197.731669025118	381.106544651726	118.349487478374	205.614665285642	248.114994563841	73.0034627277198	272.070637668078	56.2499718518194	100.804990528881	100.397169794782	171.324978020312	55.6795595368953	319.059675608396	149.924338829333	144.644175695534	106.551936818434	165.866002149873	203.879076957284	186.606264355721	117.248279929093	97.8774860681154	122.991859963452	366.059217343177	331.765063171457	237.447414175653	212.470894617494	244.890360108127	97.7108181740935	334.315325714729	185.38177203929	107.208088727426	217.532412027065	123.620366176515	447.640612639831	199.030280599851	145.672370713686	490.286898683049	422.12127459029	92.74223714249	178.160514252503	290.595990333836	148.188433488911	120.593288912156	80.7939228220281	120.203667117636
ENSG00000012061.15	887.006763127857	510.339156544735	556.146605142491	669.731890439233	940.78466539467	1021.66514709013	600.065752511351	652.273957316904	959.902412332237	371.979851294795	797.994745061901	371.98937162548	688.78064044958	243.17219668601	1022.12399755675	369.030291167172	754.207458978167	577.685830096189	808.348054857104	576.281772859482	498.019564174008	953.632722471625	899.39601519209	854.673402046559	450.409396257473	511.597608268003	1301.35584348673	1238.4636781344	955.220811042832	885.322868195749	1353.41157831619	585.604046751979	1500.27349216122	1095.01878143526	770.104897784872	1152.14758426086	808.125217733202	1452.68555032327	1482.91223496089	1330.55857864947	1593.66014136302	1111.82723538154	468.144430757063	910.320273171589	1444.40579095787	589.562509934733	477.380605555411	664.186221869147	649.974323996795
ENSG00000012124.17	1262.2498983502	468.001574101896	518.957835784051	1243.69605009359	830.092924161577	1360.27600619985	1047	1009.01334687544	1118.46923301237	463.929685644985	500.215566098038	474.86154218803	529.067517555464	184.704634481462	738.952060673011	183.836529977866	2617.6979699604	1274.36586821803	1021.25116836404	1015.70180438505	772.221430861321	2746.8123052482	1662.217686669	1887.09500914463	1017.66963236598	944.002770301404	2499.62040146384	812.856462614675	3074.25357989843	1295.89298254311	2375.56432595762	746.995278586762	4629.88748080487	1524.66709137111	555.003182435748	1347.59518527662	856.851559548926	1028.10911016005	2499.98122616037	3330.0973675236	2930.72644097841	2358.55528350887	609.930684144231	1953.61306860863	5312.33769638705	980.9705723375	1963.781305702	1204.17311488777	1372.72941277855
ENSG00000012171.20	33	26	10.064087455084	20	30.0095433226306	37	40.0002038684937	26	44.6074760203087	6	59.1685676325092	10	39.2235190987672	43.0915925345433	33	17.0074156161723	37.0275003799375	12	14	29.4886847308577	25.0098867904481	17	15.273668425447	13	5	17.0302608773279	50.0428843401635	24.0000008584539	40.6287702753166	28.1819505826485	24.107224000698	13.0678328075121	14	13.0116100565985	14	31.1411872586693	16	54.1774491583929	28.0032328413271	35.2620932254363	29	41.1065771910464	1.12210634412999	28.1638985024394	32.2746484229652	13.2787020530772	13.0090125775492	22	11
ENSG00000012174.12	66.0091281204741	45.5738081732868	58.102526226679	60.3695548383677	94.0470918086948	124.239430083293	30.051264138294	92.4121937075797	85.9106527297773	31.1354068215141	56.737949742264	33.0940697315365	27.1358921840829	34.2838552568114	64.5258413687544	27.0670637429181	80.1012610339622	74.9503764583904	106.103765070658	46.0135126598802	41.0906309904546	92.3017832411405	89.3892293645513	82.6472044305613	41.1801601640719	74.5371374154243	117.964821923454	172.709640695739	90.2342353604126	103.009697091013	185.568035031807	53.1923502393748	179.893160834017	151.449269299749	36	123.460456610475	84.07651638349	166.82657187975	118.114046494192	77.1671107997326	198.8371374424	114.397831986691	23.8432811204242	90.9985180900033	133.127445808933	21.1244948634497	69.1855977937983	34.1472469793349	70.0043601413688
ENSG00000012211.13	202.518926309038	139.633621188721	216.907022451808	251.482627269369	259.177633229074	313.90906685706	204.894467874189	157.339748543638	355.956708798535	87.9086115337264	207.035861580311	77.8121737990122	189.814023986223	114.188273112649	235.701458996188	71.4767791299507	251.410021777725	172.754976676811	238.257342751278	145.525705472141	157.906807185066	281.040800449808	253.190254800387	243.37659841276	127.791570416233	122.907496584743	368.007817969533	335.098133697737	209.483827029591	259.033683342061	427.344949105954	158.818545612205	423.281340040797	221.926558354014	180.192888298809	322.345618729704	180.354981415397	329.504917835552	242.99088852943	343.650697485451	399.392111441819	402.579243584859	70.3551178614625	233.576913085954	370.703275297202	192.317060879887	100.845347642764	100.648385531129	132.028162004116
ENSG00000012223.13	2019	1543	2021	565	678	129	1036	107	1560	453	2694	168	396	60	291	1618	176	252	798	478	1725	2758	1717	694	488	274	171	1267	265	340	874	2630	478	334	971	112	1319	3073	414	678	267	1116	250	302	435	1589	1417	452	40
ENSG00000012232.9	1705.99897052919	1040.89914485039	1118.52105245068	1855.18334886155	2138.23148260773	2318.93930812908	1451.22454477891	1325.89869237235	2558.7077658343	1157.16313467967	3265.89613610767	427.049821400621	1210.85350748423	2086.43475463854	1843.91082613064	768.242857652441	1996.06243061815	1337.68326956211	1309.30964155859	1192.42933275056	2100.76244675073	1461.61355326833	1864.56425869429	1460.89706346175	996.389439099859	1080.87028081094	3473.43646568768	2414.19825367692	1503.7129859874	2342.42673359225	2659.16868031617	1455.66732302665	2556.00170611306	1048.05881653393	1124.55470249714	2233.35836369811	1044.00023642759	3584.11675374089	1351.87753404726	1808.84245111531	3035.27245333658	2277.1551037423	541.093042232975	1587.94289826281	2316.45892801931	1446.09177468578	860.055563269044	787.048624773554	1036.53090570639
ENSG00000012504.15	1	2.02776748161788	0	3	5.03187099716536	1	2	1.01018340704752	2.01209558950351	0	0	0	1.04485955397576	2.51263016607168	6.53127185173191	2	1.01318529632758	0	0	2	0	0	1	4	0	0	0	0	0	2	1.0051757915798	10.2169527679582	1.00788757441544	0	0	3	1	1.01205054018615	5.04924823087008	0	1.00378866434034	15.0669509355644	1.77222326309785	0	0	0	0	0	2
ENSG00000012660.14	3877	2068	3545	4393	4544	7335	2501	3974	6024	1652	5040	808	1673	1713	2906	1347	5618	3759	4671	2833	4246	4044	4336	2854	2410	2607	6699	7406	4290	4434	7295	2205	6910	3226	3167	5703	2723	6867	4644	3789	8229	5927	893	2859	5606	2294	2547	1659	2803
ENSG00000012779.11	9256	5789	7222	8857	9561	10787	6194	5736	13118	4547	15108	1654	6058	7272	7121	3998	10845	6864	6899	5757	8847	10236	7408	5636	5167	5727	12930	11176	7538	7883	11200	5229	10674	3946	5204	9798	5044	17034	5590	8488	12118	11543	1701	6848	9770	7251	3513	4702	3191
ENSG00000012817.15	4.28649093960232	702	1097	1338	3.00239123968562	2137.37562700336	926.397913654795	1758.00935865471	1841.88703680203	529.773917716471	1371.1390949031	660.734903627856	552.00000000001	5	2.00049824674243	566	2.00308834554359	0	1754.51111385318	2	869	1123.06156869499	1732.40061420812	0	735.315551413995	1029	2827.02683805581	8.00010089821822	1946.00316087718	1777.00000641531	2715.01259112126	731	3922.11353732405	2373.0022573086	1108.18408399624	2.00162171896196	1801	2788.35214352808	36.0619603535593	1572.30372078466	3989.49716218495	2536.11586035164	415.445253104608	1779.93942212489	3096.86267802004	653	1225	0	1483
ENSG00000012822.16	2980.71873822811	1962	2604.02492298274	3402	3724	4202	2282.0035363399	3045.03437378711	4558	1706	4520.44195331894	1175	1820.05005368584	2535.06826746902	3000.08760573228	1502.0151858216	4058.03965111868	2223.0304511289	2395.0319776048	2394	2802.03407762098	2825	3637.0508859244	2973	1820.09542694375	2218.15051835464	5542.0608477951	4681.35849085945	3385.39356977461	3911	4933.05896899657	2233.07430630669	5729.47160661464	2740.47190807449	2673.73170581526	4047.17061436789	2811	6753.22557405031	3883.43848121931	3901	6042.27533291038	4788.68127292746	749.03961962671	3930.23225489113	5201.09170701824	2373.00926666686	1580	1678	2207
ENSG00000012963.15	360	278.873900070615	292.179136736056	435.789393510898	411.323306185867	633.354732027465	288.551604746961	427.344789174801	576.48366097145	210	448.440635115611	173	179	133	363.644738775285	215.69766020722	528	395	476.713847570217	302.614947526491	364.948039629877	433.005341326262	592.80717645114	489	283	298	713.80939627431	714	553.999163865476	626.999272054858	885	303	817.302211891726	637	374	736.928537156847	476	923.464357326721	630.969104743286	504.892902928872	870	765.771235157283	147	452.236547250215	764	277.774682228442	294	236	395.637564320467
ENSG00000012983.11	300.518155249756	153.919206474095	257.421641021472	271.229724769995	291.583501826089	409.735100339873	137.211746449673	291.486260418682	377.571415204785	125.712809739626	255.442718154458	120.299841120706	76.334571000453	84.5469922456992	202.04041068663	197.972885676642	345.918705229481	265.021822621057	503.358297234339	318.745814862089	255.967741072329	385.952503650767	367.648596915261	319.708799754829	158.677106441616	246.973865423013	403.194254944143	611.038051944225	487.061643560603	363.033728236533	485.268977070681	189.88282284985	627.612358665694	498.230435146763	347.837649351932	564.647407625252	416.74192577851	496.725798228161	663.42375413205	204.224211803541	673.463634861256	504.345268802576	135.778533639701	339.592819068285	469.013562469336	110.454854995562	218.202319167841	130	328.613700533696
ENSG00000013016.16	151	123.019450708997	154	272.001479554762	200	189.013451146298	163.039096910712	246	191	215.033322206229	241	141	175	230	145.202210709946	88	221.021669816916	151	190.351408189041	169	162.014112375641	175	189.019484288155	287	153	96	227	214	358.035981026308	266.025454349844	320	243	375.0259390262	337.038302860012	125.035356696075	203	172	289	158.021022764785	268.509690899176	250	362.045307765833	132.43954371778	311	569.03806191302	221.027813310115	89	70.0052334219174	280
ENSG00000013275.8	973.832937619823	450.229375494558	696.013147248959	955.567308412008	1030.29240551851	1255.16917101685	929	882.185770308587	1166.04971830722	580	1136.38034050248	430	944.478462650489	363.303214087989	1159.20265466196	556.010926158316	1093.57346710984	698.025317601983	965.244490929962	734	692.001249812229	1349.0981875216	1186.42529676352	1295.11497297744	665.081581765343	675.375472050913	1535.12624106881	1675.32152757578	1135.63236213889	1029.40972711989	1780.1609620033	763.353907715659	1674.38341470495	1146.01139056422	893	1449.81292107775	1020.06681184482	1799.23201905428	1483.32410290562	1875.57295622574	1660.82896193117	1575.77529447768	467.64987556478	1246.94518441255	1993.22677106169	1054	675.100201600932	861.218745616148	841.563519180143
ENSG00000013288.9	1751.09597624194	1325.48643080873	1761.34742453842	2059.93572947222	2011.08583919003	2623.41995617968	1621.66089710974	1501.90968161227	2386.377135286	1098.38046616615	2480.45906011098	682.809680694564	1213.84035387921	919.700306126988	2232.90833189369	872.476311369877	2013.99817080925	1397.8266309445	1754.48799160804	1280.05808850983	1415.80602632377	1663.45439303604	2184.41897466898	2053.00511432821	1034.19614230482	1283.80675650633	3708.3812914012	3211.7578986626	2014.18995179021	2315.02111465216	3507.45584156519	1225.82836457928	3418.02931406467	2014.98233659907	1619.63358671327	2865.81259794545	1990.3623864071	3218.06044397109	2578.52384149744	2256.34609528266	3640.63831454931	2866.66543527435	655.120613111922	2143.02797760204	3332.93652587479	1487.03947179467	1225.70095826891	950.344378610106	1173.98677747933
ENSG00000013293.6	3.56113001238683	20.8204641287055	7.75008888573383	9.37908657564435	15.8321707675099	36.9379612151789	6.81331597058566	17.9342613889084	12.5363734216909	9.76901340688765	24.7608071878273	5.23582325995047	36.9602003954311	66.9765361043623	26.121297031517	15.8345380438181	21.5225570052425	21.253599145962	20.7008396041989	6.78560248234394	17.121855617399	9.94848833525308	42.1460675995113	11.9415686329831	9.92142564786957	12.7381979604818	27.1899599344912	23.5481799985216	21.5365450533118	15.1864307422826	29.9346139289694	43.5625651634934	24.0286296072177	14.1395761592071	14.7799136591433	19.0559355986867	10.5878519029251	29.4364905135295	11.9764654597398	28.8966696332291	31.5092159634985	195.778604512247	47.1553417741432	21.973856779469	29.2731539543549	8.50398175059271	18.1933041516531	10.6091791378166	1.04601922829041
ENSG00000013297.11	129.636972089086	140.809793996951	185.907754994582	94.0119353212327	397.121127630831	211.706163858354	269.92153766593	160.28576393736	257.560648219752	462.615427168398	179.941771843959	609.699245829291	181.64526218629	61.2064646913979	450.907613625528	201.742931110437	195.957575401808	182.594103996595	103.159600919974	326.527744832561	116.291366304496	260.211741728458	150.761456688674	214.734652023358	253.381525350996	584.439993021962	223.484120044225	227.4315828887	218.894261321108	246.145650596064	356.715959598988	314.292650502227	150.265275029038	697.210653691519	652.728818003897	824.072516581448	610.857741692358	169.613917999609	319.288372299509	186.631877522574	102.731422224298	161.821089412694	576.471990273774	210.703418989653	158.472981328663	165.191069942098	233.002330258203	212.450543770654	144.146535014194
ENSG00000013306.16	16609.1523141035	16497.0711103283	26959.43215988	14025.2555954042	39949.2858957312	13345.4640580776	33752.0048961336	26071.316080354	25573.0129906876	34081.1398521736	22096.3195769091	34686.3638512695	26788.4617179661	6604.31146292705	37072.3187014838	54123.3634615288	10315.0897842652	20345.0856288899	28574.8055983615	40979.6250216738	34377.2357930973	18750.4667900558	24693.6675288171	35273.8635030833	33471.5499920208	36469.376402197	32521.3504399467	20116.3034163535	20068.5346981382	27989.0000751451	29187.4554967503	62846.2957575752	9163.31778027937	24171.3068396521	30954.3433445686	37905.4413010184	61515.579822487	13893.852540188	18644.3571350306	33357.9513839518	9221.04928403599	20910.0643178899	33891.6758973586	30219.8865721522	23149.1291658914	15837.5013306439	13198.0712272328	17083	16686.6080134742
ENSG00000013364.19	8295.02157327274	4258.22841526313	6954.6653241991	8118.98911170901	10657.7010751668	10836.1486825147	6292.49280408511	7239.69221052067	11156.6357894264	4129.05168865675	11978.0175937768	2158.60902442199	7956.78360522508	5286.71221628243	9014.04752003707	4020.87019584951	9907.63509162568	5659.58470722702	6347.67689744831	5644.66517789272	8270.69074238709	7950.07533016332	7475.03089152385	7230.26709833767	5157.76914969634	5355.84871775942	12802.8958387787	14468.4986161157	7848.25280852043	7497.42421075166	12547.0463096421	6187.92516408471	11773.4625907448	5232.1849936202	7348.27207250517	8897.92047034539	6079.1230896658	15878.0164694663	9124.93650348978	12883.8055007077	12658.2234066405	13258.691821115	2911.1219242086	7211.40055118759	11573.100468788	6934.60744915272	4240.83771025521	5839.88330334224	4398.78781938056
ENSG00000013374.16	1682.83106724255	1248.23142447875	1772.73844580226	2000.30045743638	2028.45672281996	5145.88325865804	1720.06045225667	3821.00732852758	2253.39626854839	1019.12747382599	2231.06383239046	747.626194248791	1273.18371268138	1046.49122856696	1862.033785419	975.19457187564	2223.75469673704	1627.37309528648	1916.03718396394	1378.23204581486	1830.06960229296	2072.26113476	2072.13728789015	2169.86094276369	1254.86559685916	1416.01724978179	2565.61423456928	3333.11888898429	2472.70385284125	2469.43924507051	3632.25345804261	1517.24660773122	3835.23225160874	2279.29002031213	1798.61120564239	2906.58588252915	1930.32114245891	3838.32448105107	2710.39422019267	3216.36279549286	3883.00356962014	3708.46066624532	835.195384394028	2713.99220924246	3840.88244377192	1535.27092201877	1771.24001356789	1442.20587677274	1770.99751873677
ENSG00000013375.16	144.860069426047	101.595057726397	148.373791487849	127.027393376698	155.830842505664	240.505164950285	98.4232689777539	205.170681567998	187.991091735039	43.4088084597145	111.332741197586	64.1279064602704	29.1327007857529	46.2118571198689	155.422851491094	55.8755840749947	254.776618466951	149.357099612437	245.523818915063	100.234893660322	112.589875510383	208.497063172606	192.068688114301	182.730323966377	63.526446350898	112.260017819037	299.098916430328	390.444037314635	264.602680997222	201.715105876794	267.394086137252	73.9297905066062	387.072789361493	270.451636344907	135.061642756549	280.027799782747	186.81808673382	268.915575145199	496.679224139108	77.607314788003	402.277045626339	271.165135086443	67.1612277066908	151.055915950823	296.174761963805	42.1963915514715	172.033720229109	49.1128919891432	124.642803405776
ENSG00000013392.8	41.1148693186013	42.2299971427035	48.224737593139	37.4088975044182	67.0080734074966	68.6984965798535	19.6639758572065	47.8204395147425	48.815514496625	17.0203348069707	28.3302963868146	17.2656016526861	17.3180546400823	12.274481811736	56.4983483173448	23.018408698355	59.1006853045202	40.6333647776359	60.002253553853	22.0729886107548	33.2485884329643	52.1144202416297	42.5819640601827	46.2420001491901	26.4689110423381	30.6339802767542	98.9960157831079	87.6010946981597	71.462966258123	68.4339935753719	80.2943526171444	20.0239806598918	101.112954204358	65.0593466246521	45	96.3675235230443	57.6604289010556	71.9397136375971	138.955370608034	56.8542208800509	113.082858564448	73.951081140263	15.2008355144895	54.2369949260467	70.0178254407245	33.0136943976521	45.2758400891158	39	25.0139606056655
ENSG00000013441.16	2113.3130573305	1154.16446285614	1811.78803860905	1568.72562817282	2720.7034606935	3168.85106941571	1124.14748550906	2165.50425814016	2884.58437892646	584.774133968823	1990.16418030164	714.003814345857	466.115368294153	775.797065244257	1730.68539562845	485.4282032873	4185.40490888883	1726.79466962541	3664.2042898132	1289.90655880386	2011.2720906262	1828.44375541201	2538.64561574513	1405.27368600512	818.927642810529	2103.49844705239	4960.4697674607	4818.95901357151	4064.39556430157	3284.71055530128	2769.45068643613	629.710449347582	4685.93198479436	2924.62847237742	2047.61149274646	3541.81607911119	2043.29200734161	4902.29667186445	7300.57679462789	1154.14110891049	6107.65406966123	2982.28463726321	675.40896596669	1633.43581334098	2471.0328239456	679.709881678454	2316.37820054042	602	1472.99450433775
ENSG00000013503.10	116	75	115	108	82	165	98	121	121	48	112	40	64	38	90	57	120	87	140	96	59	129	186	132.921024849321	63	57	200	223	109	138	247	79	250.820333951573	196	128	183	138	196	159	135	264	241	35	121	270	82	83	51	149
ENSG00000013523.10	321.963761840979	191.338414507522	293.198019352915	308.448235756632	380.935520225779	562.481376572107	216.688423916157	361.238840261334	429.202680498582	153.395668233197	309.696508417348	168.180686563538	176.963144186631	105.593319386365	388.428395482963	137.286003137061	426.316258013613	333.375261478267	377.637224499211	298.823201600341	240.992886592479	394.224879027092	422.223531392981	448.700076131764	201.683964585709	211.411106480374	565.919458604178	721.933161374526	404.490461971621	395.747043154592	655.612550554362	191.604191063305	797.661226455714	513.922350066022	276.518634884636	618.95036021472	420.679239643144	520.746330011918	676.819223826991	435.59936868418	774.694269078549	542.2483745046	108.487786988389	360.512470405167	720.78199172473	217.888927381191	256.119821794727	238.183149607109	282.346686165029
ENSG00000013561.18	342.752570273822	230.645703763788	340.037335346259	365.658211504424	558.498046571782	646.164988682877	283.929452806677	414.151191886656	550.429624862205	214.600566100282	432.700761911874	217.282705031037	154.682990242749	117.760618891392	369.066228363421	471.508936270388	537.656814787991	377.041630694375	656.405472999169	290.223947570448	382.41472530319	497.361730321565	556.649927473836	397.180854819077	249.295470245971	389.707749206741	809.450336121788	861.388750268055	642.927128814484	544.901047019917	684.782956974533	249.495296872719	825.598788116218	751.338687119249	394.725160581665	702.489030443392	654.125733428444	761.205777280746	882.834106853631	473.1279196318	824.089001636537	720.305964621534	270.639427378338	414.414835566149	719.633136338076	287.960543353787	431.237565929411	192.12730724827	344.399238106383
ENSG00000013563.14	849.597828437806	451.053515035161	676.043874409365	718.860526529075	1200.4245564294	1144.35132478276	700.860875558474	711.560520455024	1091.7873629625	395.98300180587	1058.779116928	263.578105696946	652.40919565824	368.818488863128	756.391993271488	303.548080035986	922.563250316643	468.578454672793	784.487062389374	518.457872187266	587.880009087204	870.195063828561	866.316257754005	745.083740281889	450.486166321701	649.620413494602	1470.95288003282	1376.40715184467	803.487538367758	812.644191267064	1402.09522486505	623.401315704558	1169.1490486757	783.416211675061	722.837244178876	900.958632338925	644.465632357393	1484.44485545656	1300.77840456411	962.537590387531	1002.09605586317	963.712698090317	281.186313034804	815.785132975641	1155.30752321555	696.782067293919	506.573575397733	539	550.017098280593
ENSG00000013573.17	462.628318834778	203.271564631682	363.177499111553	612.634503202388	437.458158291007	311.725713061826	378.100716922726	516.710206957609	843.385433505945	188.287179002284	381.694381760151	295.173136929224	116.503637513345	99.5038982433789	540.571709885914	183.249107826036	554.328209838869	373.46452666502	404.941126003623	325.700937360329	430.497274946825	664.992528347563	873.676004973491	773.097088917008	384.839523980873	471.688605615101	802.88238551371	844.055107074162	685.583732421464	845.026288328458	1285.33298689019	225.910910919775	967.300318098478	665.146447284134	386.385228144949	766.565506594353	445.668341284934	765.640175341496	1037.51020612954	265.628845599652	628.080945128287	1546.13742991987	216.455289549594	1031.85413731503	1656.33528265598	559.705833804941	405.967803368834	507.232440391154	525.131460713863
ENSG00000013583.10	585.205651000777	248	567	413.128537526775	921.652771444781	654.214098186445	280.169373036021	311.160025387666	643.01346390849	289	511	222	398.555046346004	175.874348125659	450.636931556098	225.26221518678	388.44114753446	262.760054140828	493.668746470572	682.116697588741	339	537	392.238677901537	366.00175812032	222.203033405172	304.810726343428	672.490106497503	701.049129538261	382	426.227379138818	790	368	545.128916334698	581.826337942855	638.040673854341	595.051028576838	323	782.032588387864	713.276546310059	725.355302134308	599.961403109884	569.350985549092	249.159846398308	309.01218418199	646.484426220898	276	260	297	218
ENSG00000013588.8	28.4478309966134	33.2226562914239	10.0845205104772	39.2164913345152	24.8349603102217	29.7694293073206	22.0864419680239	15.0178978713428	25.4020731388546	16.2929643270664	23.4138573363143	8.65645970363512	100.549292671203	165.063935295455	41.026844444458	16.0145780236548	34.3414504457597	23.7798027274076	31.6295970949833	20.7220141607457	67.5533901278401	25.2236149324243	105.659514933752	22.0227728877627	24.4086929953157	28.719162701627	31.3151843938289	67.0145272470441	45.5693065106762	36.8728842359129	35.4010627006034	82.527776592333	33.3825934842739	11.2879966658582	29.8051879105194	22.8317321421623	13.5250079967748	48.455537529927	44.3775019433676	78.3347706321501	39.1063925220748	506.1320143091	148.707878393679	25.4265861054161	33.402427207643	20.8960373214624	18.5807075729731	19.9419353944158	3.76024733584996
ENSG00000013619.14	20	9.00148187105008	11	15	47	25	13	7	17	10	27.1496768037118	6	4	11.0098917882562	13	9	29	19	28.4129027984888	19	25	15	21.2069930094604	29	12	5	33	28	8	7	44	16	66.9999998529479	50	4	29	14	26	89	8	30	28	5	13	51	13	3	19	2
ENSG00000013725.14	2968.01047143656	1576.81755023855	2111.15561516764	2735.00481032726	2527.38673070967	3638	1970.03622189744	2310	2637.05626088917	1396	2048.27469934946	1577.00459499246	1523.05721248543	608.911445312183	3730.40302716851	1429.45882300238	2439.30399437257	2474	2678.42179842509	2727	1452.63137461166	2022.00245825848	3223.99025714248	4113.37962802754	1758.0033908843	1567.00203370718	3436.74564096717	4982.00005348928	2998.01303335135	2237.00187597499	5526.77043369619	2003.86459842511	6050.99733760824	3982	2604.54754089038	4231	4129.30571000175	4302.97843546994	5028.87593103442	4090.51924096021	5852.10317008753	4265.28432797201	1393.80579533186	3022.63551265692	6231.2875427489	1856.32856876868	1713.10268015621	2209	2517
ENSG00000013810.19	5019.16888320391	2395.89972593079	3846.56717572683	4537.60533528508	5189.55005493193	4884.27977686366	4119.1798429067	2867.11572485197	7658.79442969466	1945.44415392197	8020.33001754391	1211.61575445101	4688.4292593113	2690.27243480467	4316.95184279689	1920.663151901	5593.04616042128	2606.39342028293	3732.67432474934	2889.64692446731	3780.39450136794	4243.2138459018	5064.91802124414	4158.26690413245	2758.84668606436	3345.14790755899	6862.26090302115	6483.54925068991	4660.97835384119	3920.57106586679	7093.7869323071	3191.55398350181	6131.82365064992	2577.65940556761	4254.44437442879	5000.222084958	3473.42535923764	9596.11751665948	4454.40386619498	6564.18633311571	7064.36937093753	6844.071493558	1170.71169186661	3858.26473370771	6313.27518176536	3440.38623379535	2268.34755936302	2926.48160120402	2277.55652426273
ENSG00000014123.10	352	185	296	369	405	621	163	469	500	132	325	171	76	44	305	123	663	387	723	225	361	411	530	300	180	322	752	985	718	509	807	161	984	956	319	730	444	828	994	234	1172	592	183	383	732	167	426	137	444
ENSG00000014138.9	184.290082516996	150.177517038738	153.377624397231	212.08232976261	234.133420136201	362.685604397604	174.856944430259	276.69022627407	322.809564905019	81.9557725223502	291.210681675095	127.590566154541	186.728885971575	89.8371581833297	304.832789753955	134.956410577512	281.274862872293	160.310114685624	208.027093212645	131.911218256924	170.001999589637	283.770447534219	258.453983170799	309.840520017641	148.09455276012	190.878537515335	439.905938227391	386.656931206434	338.928002601438	271.697371068703	417.18332629136	169.410870788694	491.808985506587	328.215306421135	175.791548149296	353.561954044497	249.237935024849	500.784027139642	411.547758762003	333.99353713223	473.766410325579	582.252390160526	125.817965627708	259.137964498024	417.819924815559	132.292763242401	163.074342680389	157.609242783214	263.046601354596
ENSG00000014164.7	770	405	738	760	872	1271	678	809	1078	487	1078	251	733	503	1004	387	976	638	594	619	691	803	889	812	600	510	1340	1124	828	802	1285	634	1310	690	666	1101	688	1292	744	1230	1317	1150	251	896	1205	825	369	540	559
ENSG00000014216.15	3141.74795625411	2121.86070921647	2435.79260959944	3741.03251618873	3655.66596152594	4411.96013988617	3053.67157930807	2691.78608763322	4211.99768012592	2219.34833659984	4992.65669906448	1479.26340515846	3159.42966098827	1913.25368901211	3409.36663905876	1997.49809783982	2872.91744990069	2505.21800397065	2956.54392409106	3008.38642503569	3086.67865505494	4315.51803872997	4108.70326173975	4288.43008941937	2357.04226882428	2095.42360611431	5068.85447315098	5025.8477050986	3547.17706737877	3737.46417650505	6431.90764301134	2768.29863327438	5736.95710047542	3356.37673771788	2509.8785301774	4323.12291434885	3042.26514972458	5794.53951241493	2991.82893036658	5544.06532141598	4870.76070993345	4990.88612060563	1458.54943195034	3859.42626657543	6074.12477307507	3068.77717326568	1763.71832750559	2623.28270453585	2264.2104042463
ENSG00000014257.16	244.01745007017	247.855516849169	350	443.902633406095	389	374.708093342767	508.055674830117	159.66486373321	709.780504709686	139.006479999401	703.703522708897	62	278.729074865359	172.852613732448	213.657948722197	126.928245291691	379.708140384329	267.081142141041	421.521620441144	236.219828901739	263.889546153891	415.189645980416	477.248351690005	305.083248030952	168.422387760795	433.924408975299	699.888374846417	716.187178441757	420.859725642388	319.237613338977	596.312435964616	191.80587899544	437.00908325108	226	315.016600014206	369.82076472393	248	912.882994468248	367.036966879298	434	430.55831700752	544.311585923351	100.959045722607	216.234708369775	537.460852970493	192.020594808995	332.427690469858	126.024112913842	71.7139318766146
ENSG00000014641.19	717	233.083444993038	354.169909284545	359.056156321674	771	564.401702440982	359.597805560616	465.024557479417	750.253525941602	219	492.091428937365	302.005101952347	400.216618003751	140.176415800558	657.292171226381	320.014777695599	845.155421737461	502.004996702782	794.314004677528	297.348904585514	416.002216438041	766.403990121425	622.248366498874	481.010285928695	318.078993588787	499	963.082849763391	1147.1697507533	1048	596	1055.00323528205	289.55180689596	1198.42499076996	1450	508	1017.04285052149	703	1429.01183741476	1912.44501300744	591	1042.18876638147	1069.60279321717	357.460095839659	473.044224290346	879.436329836724	278.001489100576	532.076250537235	315.027438024493	521.359132327732
ENSG00000014824.14	359.118992968284	167.96886463947	289.48479507078	321.895091875819	551.901945899221	621.392636361587	190.74786315112	436.48790091195	511.533971331018	167.577827481885	404.710843443452	159.001833414396	150.009143898921	152.35955829507	366.043684818551	151.006127656939	731.878804124948	335.32558185575	622.850304927821	206.281995628415	360.39690630644	446.640754051187	481.199953408824	280.484535323712	197.786701012025	319.320851818142	838.392441900856	850.805648624317	572.76346190906	477.666795351294	642.755457005493	196.815091744005	1001.36458969417	924.911334656453	394.58241282149	649.110647379072	498.789655003461	886.226218970795	1088.94713657	349.04308514045	1031.84435145141	642.048499038598	137.19315497054	387.797209886258	572.637831066539	151.268826130072	322.042161071025	217.892673321516	356.110093008227
ENSG00000014914.21	261	203	190	246	526	324	232	246	312	118	233	93	198	22	304	137	283	108	400	166	184	524	382	355	125	181	419	469	284	337	546	163	504	372	265	310	256	721	625	314	295	361	78	259	427	197	226	148	82
ENSG00000014919.12	517.44054640928	322.599199068816	455.822371969075	564.549420257531	502.250806507304	775.838154685439	326.011517758357	507.967736318911	742.178119518611	270.917305474257	703.360368176282	202.095514968743	276.377561657516	270.84821315683	537.913196189291	235.89339015361	652.272575931929	494.731295467708	662.231463966975	371.505369096882	430.608658176989	630.905944096353	709.423039393146	628.461417265459	311.879288742805	382.119981492404	1097.60298123983	1078.81221145651	761.115656574723	632.041437587957	1182.84953661641	331.318101149025	1129.12209203146	652.882841808558	477.322373892605	857.914609263316	528.613696431792	1116.04370973904	639.12470680597	709.658273187031	1053.93922958074	938.638410502936	184.272685002731	521.308900005368	1072.62445108681	448.484060005068	423.613438211969	327.456313918877	507.600451900578
ENSG00000015133.19	2157.01370600894	1569.00689453698	1713.01941416948	2097.02001030039	2687	3450.30049556355	1526	3193.01001943858	2717.02990834879	1207	2235.00921028131	1321	986.018015296998	518.761378815689	2661.87207274405	1050	2838.04629998035	1877.97399732486	2646.0051960976	1974.20487117872	1629.08827514227	2157.05577315161	3294.00562526583	3727.29714803799	1219.1683466145	1634.62163920988	3868.14176305523	4773.01312400237	2846.11708443348	2983.01819855755	5499.66099812404	1478.19156359719	6398.45379143055	4217.83334119841	1845	4256.23941758627	3774.00652843244	4054.06109876767	4995.29949513014	2701.05026710122	5676.08011993239	4104.39331444136	864.154712020068	3388.97436156053	4868.71488695475	1437.00832921787	2203.76910688256	1405	2769.09832671647
ENSG00000015153.14	305.613855634825	144.176373097177	215.403528505317	228.684350177114	306.794165386864	360.598586836824	163.826212150876	274.378574014134	413.100231041128	109.975731304887	292.032197497979	95.0545354614176	179.413353311264	138.60601972159	266.963258530755	115.093010511755	354.061225731876	236.310334476025	389.928084576515	144.21703731496	263.027717734112	329.5878424576	354.984276537707	180.067605962156	150.279973685251	259.616901325338	447.75348486991	439.889025495924	394.643646083022	371.573408486211	404.129534183915	163.125747468024	508.758903151057	378.18070174602	304.767424816616	422.607300131333	257.496306520408	614.401891902364	650.602492080135	297.76904405655	585.179127689375	607.276340104598	182.700217523328	263.743285904923	367.702813211009	202.172224607278	193.973179055325	137.174483465351	240.242690082677
ENSG00000015171.19	508	281	433	536	457	794	235	673	628	202	373	240	99	67	329	157	695	575	768	330	412	506	774	625	240	309	1004	1304	690	752	1004	235	1384	1020	470	1035	681	923	1088	377	1407	955	185	587	1274	239	480	251	592
ENSG00000015285.10	7122	4868	6093	7594	7190	9092.2885911849	6494	5613	9313.26857091363	4343	11900	1798	8024.7549435644	5763	7421	3773	6721	5013	5205	5489	6645	6539	7132.01380501491	6720	4679	4056	10577.7184948116	8547.16450276084	5932	6914	11612	5931	9110.24511414663	3742	5438	7777.43661753783	5282	13112.4331988154	4629	13015.2705150997	10304	10180.387885514	2184	7684	10233.0483391014	7742	3215	5236	4047
ENSG00000015413.9	0	1	0	0	0	0	0	0	0	0	0	0	0	0	0	0	0	0	1	0	2	0	2	1	0	0	4	0	1	0	0	1	1	0	0	0	0	0	2	0	0	2	1	2	0	0	0	0	0
ENSG00000015475.18	2139.0213369637	1023.236803873	2044.01723046368	1942.40230135588	3063.62127541595	3092.34956527761	1775.73739110068	1651.83162856033	3856.35174209026	864.358189672278	2791.90340606564	459.04985447355	1652.76129392124	1286.61528317039	1810.23846027044	831.639221111878	3307.17337655933	1846.51721018121	2308.90352609219	1436.68199653262	2616.49336894422	3306.19146331399	2016.27382322512	1486.37155747978	1231.0977953125	1897.24123577294	3220.34523284039	3237.65530066873	2239.5920631967	2292.92655290465	2840.95827980569	1511.68012543162	2739.01402899036	1265.61402534897	2416.60804947888	2364.7042996943	1449.09891975884	4615.15801764303	2849.44855438831	2486.7073366185	3640.14915989215	3440.79043037977	612.249769994981	1699.97465991665	2434.19649503024	1669.8210650109	1094.83262261208	1126.07679742809	1086.54045030649
ENSG00000015479.19	2938.86120239178	1106.52799667972	1988.12708269857	2138.91469756073	2667.18917698311	3477.57810630573	1118.06368051318	2479.08921063274	3398.43323589537	808.043168146839	2481.28716429287	941.78208117416	707.763070281485	616.316055043621	2238.09887727712	805.869752344828	4138.73298492382	2386.42673197713	3789.90128323335	1316.91901203189	2197.48114366494	3442.07247145316	3242.76554620622	1872.01352328274	1082.8069439883	2026.34757487591	5004.93120205553	6338.44424423774	4463.28459085956	3127.76144102867	4340.4767025196	1121.66735540854	6481.3318704734	5318.52312617973	2521.85102077807	4658.61445972651	3141.70279713318	5753.21559474987	7444.1099546973	1868.12186454024	6396.37973268216	4342.24683836522	1167.80161405665	2072.03663950526	4254.85188495247	1062.3757180939	2725.95930382597	1046.70366123575	2255.88203459066
ENSG00000015520.14	1	1	1	0	0	1.00000003748173	1	0	1	0	0	2	0	9.09348511781786	0	1	0	1	0	3	1	0	5.07724334997596	3	2	0	1	2.02948446113961	0	1.01062114942438	0	2.01732868291376	0	0	2	5	2.02158746771615	0	4	6.08071375674157	3.03218023877755	12.6185507248885	4	4	1	4	0	0	7
ENSG00000015532.10	534.761736107673	307.42439924672	416.981612825377	493.546145555876	581.672759654894	719.843765311382	461.909239151433	428.518884555833	690.407721931982	289.423036789056	501.773460254397	263.252895713504	352.895709935944	166.603884011848	640.019641184153	231.134008936923	534.982309682884	373.861549675767	505.929716924468	356.093494572435	319.458202927209	515.533706071444	499.405592391809	644.393196043849	295.565005687672	305.851132901212	848.598608989737	799.272119274859	585.761917907821	482.519392181846	1058.70019419888	348.077851365357	1085.07546927059	730.811631779697	436.040219791087	808.768158370153	560.079062247036	830.587582849608	919.558556720775	890.811682324587	1076.91062183887	827.495638996065	267.933492410909	594.584349712778	1072.4229353511	452.359532446341	328.513910245025	401.317773556276	457.063910094147
ENSG00000015568.13	50.4881702103119	51.9725238048734	25.6817772395076	56.3510388974999	154.629180168175	83.312618647697	64.0081485009444	108.706977911648	77.9741550996828	26.6211381154088	41.5631308650229	114.996161971615	88.269760445682	63.7252487413682	87.7188154914155	25.8929556663447	72.6835429854501	59.2176080446846	134.57555756484	55.3163717380927	75.0009565883258	59.2940417963898	112.151026299138	51.9655677120541	31.5424823845694	63.5889755000622	237.419790886621	162.520588244874	48.5516259345023	327.072625715331	263.248589098383	54.8872802549058	258.275390544643	95.3941334968691	58.5975742705026	112.621896950166	71.6656781496399	75.7048102963225	226.487713979097	119.006857365008	129.430163740737	224.465549659324	59.7104825398728	288.343347272655	101.230242984659	48.8792166936524	186.072826285773	34.2166344914526	213.823826230309
ENSG00000015592.16	2	0	0	0	2	5	4	1	3	0	4	0	0	2	3	1	4	1	0	3	1	4	2	1	1	2	7	2	8	0	4	5	5	2	0	1	4	2	2	3	9	9	3	0	2	2	11	0	0
ENSG00000015676.18	983.112026741067	588	731.168946807115	1086.5526580471	1096.08022156362	1670.14567901484	828.057189207011	1112.25059621187	1251.06634587664	598	967	483	665.046609596836	307	1171.32537245882	530	1278.238480188	888	1068	808	673	1132	1275	1342.05772244173	631.145039434281	698	1777.80906030428	2126	1263.8140016744	1098	2211.72819017084	732	2243.29539375763	1443.45546274293	998	1737.0097303727	1143.07259519482	1706.20102450475	1777.06511625198	1653	2240.16096556613	1772.71147406858	505	1072	2519	918	800	831	1138
ENSG00000016082.15	0	0	0	1	0	1.00087994289016	0	0	0	0	0	0	0	2	0	0	0	0	0	0	0	0	2	0	0	0	0	0	0	0	0	0	0	0	0	0	0	0	0	0	0	3.01167863336786	0	0	0	0	0	0	0
ENSG00000016391.11	35.7285156444604	28.1250480353091	30.4772433452441	15.993377259191	69.7789367961099	34.6963745550675	16.5552685891369	22.889319678794	50.6078622696438	29.2087763220653	24.2886725364001	28.7251994149635	57.3769013542569	46.235588134775	60.6326876223494	16.8341215864462	58.0824640161447	15.5756032025692	26.9013108945456	43.5438660795701	22.8993088587839	82.5191553178036	60.3506821311459	50.4054109512392	22.5579357985638	51.6400349705264	44.1889856204115	62.1275720184414	61.1887353229813	31.7388251021683	46.3205630641119	42.2780515879301	59.3971253028112	48.5525075931315	42.0676597422614	76.4654176834808	51.1555379561579	42.6614283037553	50.470633634248	68.0650392780327	57.6611683518042	149.632574964044	74.2799189805003	44.5461070159851	52.6312252247431	23.6086466329196	43.3189707447203	16.0136433093132	17.7365298765232
ENSG00000016402.13	0	0	0	2	0	0	0	0	1	0	0	1	0	4	0	0	1	0	0	0	1	0	3	0	0	0	0	0	0	0	0	1	0	0	0	1	0	0	0	0	0	20	1	0	0	2	0	0	0
ENSG00000016490.15	0	0	0	0	2	1	0	0	0	0	0	0	0	0	0	0	0	0	0	0	0	0	0	0	1	0	0	0	0	0	0	0	0	0	0	0	0	0	0	0	0	9	0	0	0	0	0	0	0
ENSG00000016602.9	0	0	0	0	0	1	0	0	0	2	0	0	0	0	0	0	0	0	0	0	0	0	0	0	0	1	0	0	0	0	0	2	0	3	0	0	1	0	0	0	0	5	0	0	1	0	0	0	0
ENSG00000016864.18	442.003376357762	240	324	416	534	613.001531617307	299.00081212345	386	568.0015614319	175	415.013153804934	215	248	139.008908339677	400.95042291399	193	591.125831627774	373	495.159983287558	292	340	498.017537574295	531.932666302325	450	234.009310803058	312.016788137369	807.085260869954	802	561.137518312123	521.036011814388	834.938879638014	262.053603564838	828.200344590325	651.00162327108	415	805.00172073839	497	956.013140405696	874.003480640321	544	770.031745671403	663.524685172602	201	441	840	288.218475582305	319	143	409
ENSG00000017260.19	556.531894519565	296.31957476767	467.84683138647	693.478657963832	825.240630290626	957.35022654009	363.284030810052	647.504544488371	763.680978391363	277.009088628107	740.881217717053	237.483707253772	218.816657364784	239.421684279437	513.035138212998	220.789305927349	931.001478991439	555.017374542931	890.732522738207	421.912742049335	478.251082180646	826.14010410646	843.374426399266	612.696271669395	330.657120916072	544.493419464454	1116.58524775385	1335.2573049262	836.615377699811	807.514890061719	1213.8326563955	353.352320722232	1384.31984848349	990.836792658723	575.677654854914	1141.32819173971	685.238774382779	1194.66762753514	1224.26974405052	541.70393181046	1507.68748258591	1039.29598380826	181.521072455832	591.56830172321	1170.66553113315	425.975633930724	584.880537120799	326.259313375964	535.81338483676
ENSG00000017427.16	2	0	0.257128955314276	0	0	0	0	2.03627809743153	0	1	0	0	3	4	1	0	0	0	0	0	1	1.36245686879416	1	0	1	0	1	0	0	2	0	1	0	0	0	0	0	2	0	0	0	12	0	3	0	0	0	0	1
ENSG00000017483.15	971	371	868	919.997254905673	886	393	1209	1221	503	1126	646.959100047705	1323	742	254	1566	955.584742621844	652	804	1140	2241	613	1059	867.707061342597	886	960	932	1673	656.212666215727	602	1017	1260	2439	598	1005	959	1652	1575	433	528	1062	485	729.943687018741	1042	963	1478	507	376	712	816
ENSG00000017797.13	3164.71044540074	2390.75198754334	2488.55243920478	3946.01528426557	3710.87192226319	5360.2660256947	2512.21073874012	2893.31780403029	7349.66644041967	2055.07488930396	4916.81164939015	1344.17074457621	2572.00587996115	3022.6236633986	4000.62556443806	2888.48326826692	5056.85697660962	2751.56116555457	2885.95846844686	3161.53466966115	3692.66870304623	3246.50359563355	4917.80694128501	4797.62338996067	2037.16162590028	2441.13035783617	5872.34317943139	6049.53364516512	4184.97625705665	4825.18642090733	5083.75065565743	3795.09757368201	5913.85498640438	2997.79757771237	3165.38757641538	5093.20406785548	4061.90678523946	6278.09127408443	2839.07802375619	4415.97288731415	7564.89715582844	7341.7387980998	1683.3674435414	3407.26182293881	5876.28137913801	3018.7521688343	1707.09627274499	2787.71725842948	2258.17148008716
ENSG00000018189.13	387.913801032533	185.090005229293	231.90562352414	259.793409545045	459.248977994849	582.491104476284	206.777566326281	434.653331210824	492.616925966815	119.251345273578	289.905296642907	149.963661148157	129.741150314525	85.332102983553	355.832951166419	138.952834032634	502.037501752046	241.175407736153	617.077485724165	259.220550344961	249.255992612563	758.900636574767	472.560894140858	363.217322010826	142	267.209687934075	636.808615823655	822.688389399119	446.268743730081	391.640301393633	626.500742777748	166.792602482254	924.697245683023	642.999714912962	277.41289650561	646.869013122523	361.989234901963	633.166761476871	952.357770908632	396.372025492799	853.694385409533	696.788608261026	158.201211999955	287.284540162817	701.38929874641	164.858180552515	379.46588677631	180.192518895916	306.028152299262
ENSG00000018236.15	2.00208251276352	5	0	1	3.00066115984905	4	1.00228960284939	2.02989105764611	2.25698057998391	0	0	0	1.04315732473968	0	2.37708618237997	0	0	4.70075375382652	1.00066795632146	1.00061812068465	1.09187357472682	2.02173561780434	6.00969589364799	0	1.09502708116923	1.01750555213353	0	3.12975354800029	0	1.00094871611255	2.02509732796352	6	2.62047074486385	9.00070972391697	0	1.12583418251722	0	5.02685397643926	1.92744973967666	5.1977773352533	0	20.6095052285458	0	0	0	0	0	0	4.07643152141003
ENSG00000018280.17	11329.3446598952	6192.13984246753	11168.534468768	10989.4019039101	13835.5460840878	13474.1857899545	7975.51773074249	5749.21317091116	19341.7712398008	4184.65588427584	15879.8863300697	2204.97513738592	8497.10128283611	11857.9684788719	13663.8455618484	3481.63207296355	15785.4648458653	6810.00239439964	6146.52873986136	6040.89150386473	11905.8769786244	8701.43101151005	8860.38018958771	7183.78874955299	5471.66440344801	8121.15068474758	24926.21683906	15514.3466035805	7345.52036427688	7426.80732821151	13025.776311504	4802.02270064212	11308.9091728243	3894.65264243728	7851.14410245399	14991.8775499641	4741.2924900252	23495.5799518126	8808.98872229463	8890.89712598737	17766.6312833922	13327.9642536341	1816.79196819077	6173.50629758848	9338.48496930166	7594.02402213553	3930.28209820294	2697.17424252088	2986.2539368075
ENSG00000018408.14	13.0817986863742	17.0480293125879	13.0922950926888	22.2115827967578	13.1611437999693	29.0858668151362	7.15810428274771	13.2850363238255	23.3782740884932	18.0992569947106	15.0389720180386	16.0329832251087	18.5435834618935	23.6891261934172	16.2589691999024	16.1965442822229	31.6929518200504	26.141321059695	7.08995544272701	19.2135749713813	25.3584749204475	17.0855795350895	30.9451126390972	17.4891491426454	9.10101589858563	20.1050599641102	49.5630136805001	26.1510491813076	16.101458195671	34.2425086536914	32.376867974389	20.1855674038223	48.4806284889384	41.8217987613507	33.3068716349276	24.1168456773526	22.1415583842703	30.5003089022077	41.5044759583497	44.8836850109001	45.6803340073187	89.2233712969291	26.4086328067269	29.0946778047282	31.3305969929188	20.1404524461596	17.2686082196274	6.00600747324167	21.1493739569935
ENSG00000018510.16	526	234.816615437307	306.000158583997	424	554.739163099242	730.043315648575	341	510	665.274430602621	158	480.038894402651	195	149	96.137021775858	400	162.724131078326	661	422.110259674222	874.993164447569	291	402	602.010246853426	680.360247435376	424	250.492115148127	449.061046312976	824.000004386543	1186.00017186326	627	588.737826743066	1015	259	1003.57983451316	773	424.032840509318	802	504.584845515114	1010.60462108435	1016	446	1125	926.006220161185	157	397.504211894629	715.010757079398	305	390.548729091681	257.187651301604	374.308417622279
ENSG00000018607.6	0	0	0	0	0	0	0	0	0	0	0	0	0	0	0	0	0	0	0	0	0	0	0	0	0	0	0	0	0	0	0	0	0	0	7.37969219341184e-08	0	0	0	0	0	0	0	0	0	0	3.00975927714967e-07	0	0	0
ENSG00000018610.14	273.416910218418	157.316832068751	146.763413235771	218.157724196733	285.267842960055	342.539818575064	173.010088007213	113.607285518822	303.873245005141	115.8705660891	282.826725561796	106.80818593991	190.868712852438	90.8076898047393	259.377643625099	123.902680210108	279.192205828153	209.820833185547	300.075980769279	133.388286227379	200.3830677262	325.388905646643	291.01905619872	218.699249282763	88.0128786251087	193.133851247349	455.015425771151	508.874548508803	353.540964810646	267.505109770928	360.141467187114	156.835279635685	572.18098012275	465.900177366486	252.242358004736	456.320370376088	274.745389202109	565.349492383088	603.04228004616	321.619171137356	479.830463415411	515.622788767506	149.901058121273	250.2124010455	504.121560616486	307.855035232493	213.774868414191	160.229163603293	136.303100626616
ENSG00000018625.15	2.03733872764376	4.0229456710301	4.02574141254714	2.22499182648286	6.00710872567706	11.1647071009321	2.00596742518134	1.08242899218251	0	3.11776916872785	3.08451966234183	5	5.31174297779626	12.2446429422565	10.1517374740041	1.02184504323632	3.28416122961381	2.00564130236573	4.18322641128767	4.03665801644527	2.13338586972222	8.03545800866032	8.12079429361261	4.2921639630883	2.17228925513908	0	12.0994502682485	6.16381537912747	7.02957716868963	0	3.22555573377082	10.9082196445924	8.51407727646824	9.54584412264271	5	9.24044225082526	3.00068693750977	9.6940309033163	7.16200747997452	9.02938820744695	11.0789805050379	40.952566832286	4.04330484077736	5.15461019801117	3.00348521292162	0	10.0152199114759	0	0
ENSG00000018699.13	143.053367077458	70	76	132	129	219	91.028924301068	214.118299232062	185.079371191552	88	143.044371153839	48.0280762100772	101.090475211404	44.0970954269436	118.071716591339	78.743445153382	201.104655138806	152.504442381698	193	71	127.055740721016	214.679505413886	206.737755131924	233.017528203491	86.1121684219144	135.031680666965	348.187170301414	306.367809867856	226.106976700323	172.073952752388	397.560579560486	86.0464324074322	374.059751884231	343.017537143738	127.214349673837	288.029974955956	186	297.089436462555	339.056456934054	231	372.124644186577	375.441861159099	67.1242838829833	142	415.061803021922	159.058553007301	116.169515948891	112	158
ENSG00000018869.16	29.8160393460231	3.67491489723655	22.7856018909749	41.3646512813627	10	34.654717973314	12.4253504039094	24.1982886228653	50.8786893517552	13.2222841857619	28.635747645431	23	2	2	48.8622808421778	15	47.8313874678029	27.9879299033626	60.6083191594932	20.5289560002069	22.1275183777386	33.5335937550565	48.7367422633663	27.893301391635	11.7040535384475	31.4267372199274	91.3455613306126	78.0379465570718	74.2879439300922	53.013826203737	62.2543194351447	28.5873414942742	78.5591120473379	71.669189284152	31.2204823683381	52.3900418137655	38	78.2534519792427	124.824334555312	32.8176629728522	96.8982344497251	64.6959643766298	13	42.0474587659266	68.0793848888639	25.2076395382385	28.5579328109036	9	70.996222513775
ENSG00000019102.12	47	21	24	36	40	22	82	32	24	42	38	16	37	37	54	30	24	14	30	19	26	31	19	44	28	11	49	28	89	32	77	50	40	47	24	33	43	33	19	50	51	29	33	52	67	39	6	24	44
ENSG00000019144.19	56.0383088317851	46.4471309614315	41.358264817935	33.8436821878719	55.9979415492531	92.2058054040724	39.9768795741915	42.4304601790997	62.8361430487994	24.2534806258253	59.5798904334912	20.9627076101645	86.0431976114966	81.6293698305083	96.5430956139806	20.7710392250549	63.4339562253624	43.2877425403123	60.5469872534427	42.5010768998996	42.2564710612553	39.7677667627839	83.4755341489099	55.6588556621175	21.0002890772635	48.7700238826802	74.9588145528792	64.6722331459542	55.4095701258133	43.7112253295463	92.2752039229353	73.4615433396246	88.1608209378269	23.9724470515807	50.8424029793366	66.5981900902781	33.9014209929894	73.2891145547552	67.6613748774668	82.5663242413242	69.898235493339	254.470760817934	59.7138798708082	39.6344484651087	78.7545067174917	52.7134446980438	47.8553355498952	20.4156561222731	24.487528627804
ENSG00000019169.10	414	169	208	155	408	343	129	230	272	70	381	78	333	94	331	83	371	169	496	161	151	305	172	377	210	123	433	246	278	236	604	174	650	285	220	154	157	497	335	316	142	314	116	225	195	331	75	222	52
ENSG00000019186.10	9	11	1	9	6	2	0	5	5	1	1	3	1	2	5	1	1	1	2	0	4	2	10	2	1	1	2	8	3	3	5	1	13	2	1	13	2	6	10	4	7	26	1	5	22	0	0	0	0
ENSG00000019485.13	129.101772249748	81.2592450465004	85.2560753638901	151.017702039458	122	203.920060127172	104	135.07493210165	171.066900142105	77	113	68	47.0300740445721	28.0588963918245	138.70141417091	46.09444230588	165.890066900395	100.233634252678	146.05290997237	84.0803954653712	74.0693475973743	174	203.881891093361	202.966496030866	88.0611204069597	129	253.704793703268	318.836490286117	196.126845520565	177	252.015761285031	83.1109583249348	369.246402362822	199.079618977773	79.142993503453	232.909225636428	162.954933000354	222.208790418664	223.048057938776	183	362.93567463697	224.912767160964	40	146.302493445426	292.213085012887	108	109	76	159.441702316322
ENSG00000019505.8	1.08536987791433	2.19631830954592	0	2.0092287340197	2.00749992927965	3.35294343908958	0	0	0	2	2.10578969870766	1.02057117183029	4.61092668712236	2.6789875417537	2.17985259316782	0	3.10835117571675	2.00802948064489	2.10230024042816	0	1.01188336526405	1.0026192254028	9.04286887410942	6.17355180081629	2.07745986800289	0	3.08106970662721	4.0801936745079	0	1.0339664214763	3.21104307761385	4.10423325642133	7.4869379843249	0	0	3.01358196610793	2.00441908991849	5.19889880135653	1.01870194430632	6.09259840474652	2.00764819722334	21.4852710997668	4.0614085004953	5.33456998316181	8.0388037923764	0	0	4.00140111626172	0
ENSG00000019549.13	0	2	0	0	0	1	0	0	0	0	0	0	1	5	0	0	0	0	0	1	0	0	4	0	0	0	0	0	3	0	0	2	0	0	0	0	0	0	0	5	0	9	0	0	0	0	0	0	0
ENSG00000019582.15	34903.6972756289	25282.1152615526	24622.5404472701	44514.4982092635	48406.5191006364	58480.9505595744	34155.5602572858	46163.8229407849	45861.3152054403	25117.8451702221	45666.5962625138	17112.9921595251	41979.4936442912	7281	44977.1066975075	22011.170344033	42344.7409921831	26251.2806649526	44367.6551065089	33857.3819238428	29650.0232455423	62776.4278922474	55493.3768568566	57717.902197643	26527.7793204138	32867.3026165561	65737.1487764392	70341.5978984454	54844.6583539696	46794.6660007717	79513.9810319364	33577.3715939245	101857.96432453	50877.9489690731	25450.4991014566	56347.5159569619	42575.6796408587	77417.7951667939	61554.615287811	112060.290261524	65338.7372711268	75265.946761196	28709.9072240093	62888.2987652122	115626.142623842	48857.498021865	41004.124317312	42037.4297794664	38636.8116079922
ENSG00000019991.18	107	38	97	92	137	253	59	127	141	33	162	23	29	53	70	23	148	61	171	72	83	87	78	84	55	77	160	256	102	130	183	29	166	94	78	120	66	225	122	46	230	156	31	86	118	41	74	23	49
ENSG00000019995.6	663.344603400975	448.675192818203	697.740758521718	677.570418450832	792.309910795247	941.364735384801	470.09684603863	611.584892066274	922.592934084277	469.805176855141	774.574963888957	313.254520000629	343.029392508496	373.02961822458	569.239020430083	496.00161947123	776.646530492078	701.106801775976	687.848526497609	849.811303267782	776.851769500013	659.713261129987	799.953352479352	655.469156089921	416.563795998764	538.295841168973	1213.83291654818	1139.67484328388	809.959532396089	828.176974815388	1146.89006569431	522.599837130758	1060.95429967127	780.515282226761	730.955913951557	1049.37814252286	885.224816007343	1151.04869239317	886.327550991798	607.231712394435	1192.62086591591	886.584485633906	249.649467979459	549.015689694885	1218.0488183799	394.206091457041	462.992249932199	445.704222965514	574.324879457075
ENSG00000020129.16	349	209	227	352	339	417	254	374	358	193	328	136	234	104	470	123	314.702079575416	210	355.730677964569	243	182	354.820178742768	399	471	211	181	623.182672390242	568	461	391.700424715369	757.817896571085	222	766	500	303	501	367	603	564	526	746	647.916659437922	120	378	779.003357790384	341.006344048841	269	240.003038548297	255
ENSG00000020181.18	170.927370787286	65.1488418019677	30.3958178296395	90.0601741415348	184.154965799535	50.8935705944672	72.70170976296	89.5822344315867	113.787804664697	51.4425004653326	99.6097121892705	19.2898225416396	93.4458972378071	9.89389262671497	100.989897855424	50.6447817286945	121.315424137954	59.7631832813395	86.1075105563064	68.5361130924021	39.0899693079688	160.095942533923	156.199090968536	172.818167976099	30.1051058609842	70.4460850484019	67.060178795311	119.394188568253	51.9257762380485	116.406597358004	200.830095989915	88.9650474923005	200.132953440566	62.6178236738845	21.8752597649123	106.402095078266	92.7535881109193	126.327619393518	127.355676070804	173.065813584401	76.9055881112895	120.147434511394	43.3256726469668	146.014068886229	168.413596928891	84.7101136785376	81.4535353953984	42.6575063212638	66.1926098292894
ENSG00000020219.9	0	0	0	0	0	1	0	0	0	0	0	0	0	2.3025333013465	1	0	0	0	3	0	0	0	0	0	1	0	0	1	3	0	0	0	2	7	0	0	2	3	0	0	0	5	6	0	0	0	0	0	0
ENSG00000020256.20	129.217852726266	111.813125050609	118.981702338649	162.519238088469	157.088608190118	259.478088166225	116.0331132621	181.438333967982	210.081350026	76.3094421799511	147.179656511999	44.1965411263407	99.910914484867	71.163158792179	175.7686201628	86.2622444724643	166.008533991046	127.199909997653	139.700549584423	136.235314483439	148.343757232119	205.45075537536	282.558467892033	216.094805780698	109.308552289317	106.986629665971	228.481538024171	307.072681964568	195.388267873172	185.90040638167	334.300728522788	138.736071498955	331.198734803542	181.671554964949	108.501698682543	281.29988267619	196.285684429591	264.130441238151	202.821082684405	197.587779865689	366.668881266098	312.551432415529	61.5961878608444	201.684970126125	363.090715236528	138.42204281263	81.3461943147036	105.432490063414	186.165081105841
ENSG00000020426.11	49	30	45	47	56	32	38	62	74	18	45	24	29	13	39	25	68	54	62	33	44	89	73	49	35	98	78	123	113	69	96	30	106	151	79	90	58	134	171	73	96	103	35	59	99	36	38	23	44
ENSG00000020577.13	51.2942892427161	53.1264444339104	47.3993433084872	55.645626437144	114.002850111109	188.980473943289	41.7211672252789	265.053168912521	80.3529296742044	41.0051984670116	54.0554871052357	46.0987642895327	47.6745134515182	36.4511470926904	63.6286721369953	21.5368243081882	79.0836894507779	39.8233583146873	93.0829512955754	42.0398169935537	50.6162522465188	81.1262168241358	73.2878132313223	71.0845111626454	33.1106465593529	74.1506937137015	115.250954437407	212.996231559898	107.152157318346	108.205429411851	91.453045523174	47.1762489464767	219.368761276816	111.054352719954	78.0240626422336	113.037556584576	90.1250815684052	116.362623831428	207.38737426466	95.3883957897909	151.743648930131	258.269274947424	61.2471861179635	103.349754561421	108.54276066255	30.7158710367355	77	50.0332985340943	56
ENSG00000020633.18	3037.91425684345	2364.99491240499	2309	2840.92711162513	3479.91053666918	4012.97193008526	3228.98180537713	3693.98939912514	4435.9685307725	2641.98342388443	3831.97925985789	3041.94794507151	3927.90866011268	888.605424904649	3749.98192984338	2382.99096396342	3630.96578411816	2996.99593969607	3468.99615718664	3607.99129813022	2302.99369394008	2916.59589250941	4321.99323986884	5445.8805712567	1982.90619749144	2499.85451578343	4781.97607921364	5665.96247568546	4378.96568936238	4508.9611138468	6905.9644178742	3776.94743028505	7409.98317474804	6880.98324476778	2834.99705121697	5184	6148.96831677041	7328.99365757785	5919.80471621216	7504.96574088598	6278.9982623439	6149.5049012501	3191.708764076	5147.99483080861	7349.96648405555	3353.93223672869	2173.76217291777	2559.94402662928	4109.99704148014
ENSG00000020922.12	426.10160096547	237.344188135303	308.914608318315	373.086125666968	579.357797343869	847.920981900721	349.218426575082	517.134956066526	817.395376844484	199.992814904347	457.012955309641	215.317334493498	244.996247470085	217.818710036542	516.064318248531	179.45300935669	757.057905401998	449.703643092464	592.03260778722	412.850608523929	331.768832748504	565.112957558608	643.96701799188	496.856336579144	264.977754541814	404.499970356445	935.933332500114	889.643593171093	673.396485679008	786.847692642077	837.52350157371	306.754847756329	1044.57259306211	683.962408670245	406.553235182665	836.079298076794	558.774075203462	763.761532230027	1231.48949061866	480.559418403773	1404.49900968859	985.357796346177	172.427976822483	578.990952254804	753.342953729389	292.594139367147	438.263973357947	235.788371749288	389.605184982034
ENSG00000021300.14	480	220	342	353	317	644	211	303	393	173	317	145	203	80	457	128	379	284	231	226	164	341	379	518	288	134	460	595	405	292	568	232	612	380	440	541	318	417	537	568	864	455	183	339	779	237	196	376	336
ENSG00000021355.13	3720.84430350948	2091.52613914963	3686.91634531986	4176.89542295479	5038.21278929557	5321.54782716969	3343.79022612704	3312.03646504641	6698.09580398302	1596.52028690542	5139.93382754038	1048.07780173089	3309.26235135673	2373.27773637566	3617.27437178643	2312.04868984097	5526.05426192002	3097.02406248609	5025.19840189932	2016.16736855627	5342.11331621503	4668.44494848177	3293.16114583149	2754.23833123701	2211.82174275256	2849.46129095895	6781.80195247417	7704.67992732488	4472.73307712651	4309.60221947819	6448.16832882919	2648.24832555137	5343.22039553159	3862.86096483375	3695.62653943232	5758.82913735017	3508.06788272126	8676.47565552462	4863.62927391897	3890.98496520136	5842.46246827145	6136.45368882565	1172.36238456882	2542.6043344931	4915.41091998939	3122.68375714738	2485.78925621716	2020.45156541044	1878.22094807501
ENSG00000021461.16	5.05256827717756	8.59183341472565	3.52215471648156	4.28923416605804	11.1200009869637	8.86617395633468	3.57106305531885	11.5171916590478	14.4844375567504	0	16.0404635305451	3.10896132722338	10.2253809057959	14.3798485991655	3.35772479919051	3.43170447424089	9.50986747678601	6.49930101931288	9.19094742580084	7.05940491065422	8.72166446431273	5.47735809520251	12.0581759409116	9.77846989914846	3.40768797624961	5.5703034422173	24.9835668010235	14.6640570341808	6.87887898128646	7.53256782894962	13.6197715936573	12.26024595474	22.1917579261793	8.44575611936575	12.5164698592526	5.6871782083231	2.31625425158687	11.5961475024045	13.1397747412265	18.4132946363368	19.1760793306524	35.2230337361234	0	10.4803142365738	10.2105077520627	10.1709832576377	7.88671804208268	0	2.40895465655486
ENSG00000021488.13	9.12560892418111	8.66257387021485	1.46273047170864	12.7391962938521	5	10.6965790974463	2.50321296395763	9.59444464279776	9.34990719795338	5.20668013129308	4.3040987255721	2	4.51546258099313	13.4524808071386	4.55741513556684	5.02904494009387	16.9113516149237	3.28929282664159	5.58138234752466	5.46236837421722	10.4247936938994	10.2092284436197	18.3562122479311	8.23237271962458	2	1	14.0893616006296	9.63148379447973	6.44606549305408	8.23917313886416	17.7243243298078	17.4088175177587	7.72997287312211	4	9.01790218472205	11.7633633132092	10.221353273684	14.6824581172565	9.02350901472486	15.4493023994723	22.6414971692189	57.6259542872369	13.0659537829148	11.8208170327979	5	25.9104998542696	2.34347637996276	2.06119635309683	0
ENSG00000021574.12	595.696823179677	333.348266923098	474.814075916803	786.397603497958	796.61550320108	1195.31287419817	349.336091934479	630.357026326246	957.239075765527	290.397815486745	821.365664164243	172.746545991489	216.525704813211	312.97643665497	472.773658760094	205.097812828181	957.976016670212	555.894734427251	810.818822848716	408.65671747731	684.449119575263	618.109440184338	776.128579134407	471.012522981062	304.643920910758	533.401246412915	1210.82306134756	1257.68105542785	942.851420908043	729.372307798934	1073.42660320458	357.473974670954	1275.66615101874	718.995699445713	566.832928594577	978.011150406318	626.290678451389	1286.57523760402	926.694447099248	457.369644249443	1291.61069185527	1143.59134437558	219.597743434929	521.511406748385	978.444086555102	356.712517564474	517.899237877764	216.383325172032	495.059496379941
ENSG00000021645.18	2.06569475600604	2.08478328353009	5.40115880753744	0	6.11079032154512	7.10519659674853	5.12211818105021	2.01835001552966	10.0446318782862	3.05826620876263	5.15600335782979	1.06356613294205	15.1663938087024	49.4275345006619	6.06727499140568	4	11.0400319848168	8.29135871290753	8.05804917226495	8.02135515721701	6.01885644973522	4.00818472288243	24.4557023737274	3.0012924744405	4.00362825158816	11.0576007462151	10.1775935068381	5.39183140013686	8.03758837910299	10.5249206678169	2.14770019011647	12.4194223950851	5.35003547874937	5.03758252047897	12.117252593521	5.04506190220602	5.01680552644519	3.03660947543307	9.12618729096972	17.7971215029267	6.04852527017973	121.155076971934	21.293922195879	13.7262442807772	4.23130405179966	8.0018621057578	3.18207271987067	12	5
ENSG00000021762.20	639	664	422	500	871	1123	632	842	1034	477	729	438	556	243	571	398	516	305	1047	693	397	519	742	1055	360	548	914	1158	889	1253	1144	688	1397	1020	468	854	1065	1409	1332	1074	1071	1278	325	1451	939	531	427	398	578
ENSG00000021776.11	649.12308132222	484.004542226008	581.654424208504	729.214580447333	642.345619038838	1155.10517411645	395.343886551008	849.163147821954	829.243686752231	326.935174605134	773.423606225197	279.049650955168	316.868073571563	222.393168921456	583.02753152268	321	873.975468983411	608.989797570989	820.501947062194	486.026710870276	648.327074977921	919.767544288617	980.548203872874	813.455314333796	412.940098203097	518.64745166546	1098.95264982219	1329.43754879942	913.907543870076	833.078770050724	1502.21466761264	436.904214000275	1532.21246837226	1061.80917492068	588.939687961539	1177.4991643274	821.003354224841	1184.97925509026	1038.12163941525	773.278867975213	1561.63489307116	1298.05260965441	248.068407180454	811.229752068621	1414.44942400463	472.902576482561	586.487060876671	397.418409564749	726.978478458994
ENSG00000021826.16	12.2627108604382	12.7627230057534	10.2918395329784	7.0823565734761	10.1120302536719	16.0483228553845	13.2479597250274	8.51788325445166	9.02587265447102	3.4278747627091	4.32988848398007	2.05497484054184	8.6693511108792	16.0610417694441	13.0668392725033	5.05827283476698	17.1078092106489	7.06055254395074	15.2577972178368	5.35451982463434	3.06298082021692	4.1414906512861	22.9872892288212	14.2923443497701	6.12783023887412	9.31365347132681	10.162863206918	21.1949367056809	5.45321397803604	12.3499563980132	21.8675920156584	27.4896725646328	17.6487959515587	16.2357251946335	8.25641413869284	14.2312588692508	4.0677162614105	30.326301713633	18.5259374410285	16.8811127452914	7.06269567502526	97.9459052920079	30.7182342253909	5.11558827020762	11.3359231548353	2.04484279989765	2.00936372814083	10.1356182481021	2
ENSG00000021852.13	0	0	0	0	0	0	2	0	3	0	0	0	0	0	0	0	0	0	0	0	1	0	1	0	0	2	0	0	0	0	0	0	0	0	0	0	0	0	0	0	0	10	0	0	0	0	0	0	0
ENSG00000022267.19	308	114	189	205	259.920269690592	327	178.191019863228	201.998008134665	144.445758000576	253	247.67708364923	127	150	173	192.997913913254	118	138.199882970828	197.450260578826	217	203	217	308	106.814929305248	350	172	149.82299553045	365	352.809746411477	305	188	440	175.972182185311	483.154342158471	349	205	353.609364416407	275	247	296	250.479536177916	447.622720831352	226	145	170.312430773194	323.761335834046	150.766916560545	112	157	212
ENSG00000022277.12	3653	1825.08382359166	2793	3677	4547	5272	3066	2687.8553274582	5522.29847270794	1980.78969739762	5717	963.59301015982	3293	3000	3552	1961	4631.84708036608	2629.51711415972	3188	2371	3932	3706	3554.80016386807	3139	2475	2465	5711.17907577065	4621.3559929179	3687.52670536257	4137	5541	2630	4594.14273377042	2632	3231.01087558736	4695.62507516825	2874	7470.44314293596	3816.30588496493	4870.57714775563	5462	4934	1374.76533286367	3164	5152.27508079514	3405	1835	2487	2216
ENSG00000022355.18	0	3	0	1	0	4.00051346661608	0	2.03183353087488	4.03465453051674	0	3.00038723431172	0	5.08594655436305	5.01665703108916	1.00743602588977	2	3	0	2.02570211986767	1.00066948305953	2.03766950604735	3	6.00106702692839	0	2.14162683055563	1.00054684238432	0	5.00030102474871	4	1	6.04270358909322	2.02555486101802	4.05722178453793	1.00062376532906	0	1.00866322813648	0	9.17879546403428	4.0005400702096	0	0	17.0540858032138	2	0	2.01476017169079	2.00065057314874	0	0	0
ENSG00000022556.16	275.04881832636	91.6740238774674	31.1855324071587	52.6400256834552	406.996359105708	197.14534397138	106.843295933115	71.6479697203873	138.713181627295	70.7658804699213	44.0753836140936	39.1393591676358	24.6498693647143	86.5234528940777	111.406709322425	62.0716667972479	448.935112877783	85.9646216943017	29.1406289418238	174.128775346223	95.1124714881164	234.128397471799	170.654623798281	241.30595666992	33.4681076159504	106.574097622903	393.565982226482	343.571485308839	481.003486734306	121.299799629118	173.879519133843	124.042665587899	356.635871463646	104.312258119664	66.6222146370469	146.32531787922	183.068689521102	81.0253866628393	724.896345124789	28.7805147866597	295.062612885697	220.259812786269	98.1822582703976	105.556919324556	62.5744676494161	24.2475426101796	54.2562669216989	21.0216999295733	47.6852623979421
ENSG00000022567.9	2606	1870	2456	4236	3644	4398	2367	2298.95266569312	4919	1206	4934	622	1601	3099.92992242835	3410	1238	4669	2096	2478	2174	2697.98671100938	2217.87633733284	3204	2155	1465	2688	6078	5161.97608979539	2590	4165.96627112899	3073	2243	4347	1041	2473	4076	2064	6005	2998	2982	7133.97910242899	3786	526	2852.86690770628	5125	2442	1421	1313	1780
ENSG00000022840.16	8159.84616670493	5543.49699447754	9699.18715227983	7733.75354946447	14434.0707964668	7493.56758597865	8946.17181741059	9261.13270786675	12388.8156200044	11032.6526521258	10905.7202071085	7558.86716052425	8103.01281287737	4415.63777917328	10124.7102536019	18578.2152061482	5562.78750361894	8302.47295329301	9839.53909759916	14331.78176301	12808.4782581572	9732.88190831415	8505.25170528268	11271.3814717995	7732.56563922989	11492.2792536034	15148.9166885827	12933.3707909563	7889.73129185232	9351.70893139418	12836.3979374498	20626.780335344	7839.90016957885	8831.77103110061	10242.7353173616	12736.4131602695	21943.7808506232	10061.4079640496	8083.04841951094	10575.7521651097	7227.55349195568	9707.86219172226	6978.35400647598	9361.46869564381	10515.3203332324	5689.45949187583	5497.95815478419	5037.30451396385	6331.79296821047
ENSG00000022976.15	418.045668620105	285.650351372396	324.940310375054	362.203579885132	621.192770694951	707.544244537651	349.374002806496	296.03046532509	613.154214669862	210.021902332065	507.273075530986	128.537807790827	243.19002782634	249.031645535539	472.814113240537	156.7153776892	584.623844848564	337.522960032242	421.164146141619	268.710852919535	370.96202805556	369.640567366432	497.139148363047	424.021386471089	254.645643174246	328.434718429482	877.70805699295	673.185848651837	481.391853763314	462.953202401081	616.248951735147	212.526647276442	787.157677198364	341.490316413834	356.53659695633	610.635326377822	370.399624456246	752.689266088306	712.394749667934	484.495417547154	936.582231562024	651.660078829871	122.55445368353	412.411455193076	637.423521517867	326.762258185562	278.447782468827	264.622141061256	210.261124436492
ENSG00000023041.11	586.608693994467	390.36584943448	438.359155357502	516.946696441327	661.029268110537	737.535049317688	380.943605045534	580.423670771708	765.940510797253	193.163258330121	703.30826467393	225.486816349792	278.45120074353	207.235291316847	603.765557338968	257.110435663948	775.08578812615	520.866618459367	801.591386759293	336.283851026629	478.981598751318	646.400643824393	614.301541920429	562.014772384835	280.718649977803	412.658520179611	1126.00327576533	918.088248322346	727.871893954473	690.275846202164	999.468775951312	290.971986251993	1168.97269885576	850.825181791277	538.94420535108	988.692480714001	600.883586112154	1197.45538359817	1385.4487816758	620.249936243881	1063.0759427702	801.418056639838	188.719455136533	494.182862983806	907.789157997216	295.553383111602	381.260328186925	410.417234041283	489.116335620044
ENSG00000023171.18	172.884753541947	178.201244698849	237.190286533812	334.076645781101	357.219217332801	794.325680740452	215.178476272224	597.328174244581	335.33587997155	93.0888793463038	340.61449367571	101.417195103188	150.463098332485	126.648292061165	294.703874706743	88.0896553444564	304.258498080504	165.079144468447	282.858835394643	195.023477553927	181.073531808087	252.528131256166	313.62793252076	265.332072203637	120.038081889234	178.122588662352	329.866206781435	658.252606635027	335.490413391412	355.1396914895	540.139212939682	165.593343684729	527.120625655268	370.270919359175	253.05016395747	551.064528868929	234.066558212768	568.110877345474	472.432793186302	321.088900207085	555.270253007815	616.700162966774	72.2654069097315	431.068547055645	620.350712411464	231.066583655924	282.032835537332	129.01489672154	239.158433675854
ENSG00000023191.17	2267.0446422776	1369.53035400277	1414.0735762924	2049.14530523604	3283.00925746415	3157.15056199178	1873.16931632591	2416.6499097762	2980.19601602661	1306	2858.30454079594	1055	2487.74046743758	544.816581187272	2721.20091723523	1137.06305357278	2387.86234181964	1388.13393200705	2549.19971220473	1729.18615058573	1412.1079322401	3054.18982429454	2604.25503557514	3016.41141240419	1276.12825023427	1547.87704873378	3684.65235175761	4477.19372792835	2331.05841752744	2517.10680512602	4292.06350620558	1837.94629348707	4187.46828565893	3176.48130707202	1925.36058874134	3258.22088164967	2254.07261195158	4341.12886937829	3629.66769297602	4745.49236682741	3203.64868336197	3921.01957609476	1288.18679405585	2684.88492601512	4411.79373655785	2616	1605.0059474928	1944	1537.0296098672
ENSG00000023228.14	718.481493565807	524.335936042289	694.446255625384	806.470728360728	898.295891014	1483.42806564166	656.830760852763	912.025440016533	1230.38940772334	458.337553641887	950.378110713907	295.807718895614	544.283036987043	387.859603575751	743.806230730251	373.795107923059	1015.69145608414	737.132995348272	953.700232108183	615.899494981584	705.892323651392	958.60090899124	1109.87056367109	990.461728941591	459.946306199136	696.763138796932	1517.03736990139	1535.26596932951	1033.34674568582	1103.26595565772	1648.92131894977	618.086697478903	1831.84286733089	1293.93096646625	767.724701084626	1336.74256431481	817.93069062754	1531.53508664862	1292.06302173869	986.505379013379	1757.08840722215	1664.80686294086	370.299000788358	951.221076440707	1632.59343524855	657.201797196815	615.518507438985	594.420652005676	695.458480996409
ENSG00000023287.13	1044	492	909	1177	1149	1760	417	1232	1484	372	1432	273	166	423	645	329	1641	964	1528	545	1426	1099	1307	619	420	853	2061	2314	1680	1546	1618	405	2212	1202	788	1545	893	2441	1970	458	2538	1603	257	916	1543	397	910	328	890
ENSG00000023318.8	1301	732	1103	1282	1605	2350	1002	1377	1704	632	1810	417	861	618	1282	585	1609	1021	1628	906	1157	1442	1337	1224	838	989	2291	2594	1488	1415	2260	732	2183	1355	1138	1960	1038	2753	1901	1819	2179	1879	388	1145	1805	1035	815	792	919
ENSG00000023330.15	940	462	691	981	799	1162	714	645	1086	407	960	239	533	418	751	285	815	587	767	629	681	1142	844	811	436	511	1254	1127	727	686	1449	638	1167	582	643	1155	567	1266	822	957	1340	1205	173	810	1368	623	421	476	492
ENSG00000023445.14	1697.20860638742	766.448216853593	1091.93560347049	1341.85053676824	1468.29400568662	2472.54847452201	651.895577245117	1454.62671516771	1684.82431490587	486.266194088715	1144.12791524625	686.936271874958	398.599516094116	215.634000810484	1313.13827799499	517	3215.51270808994	1846.51934171834	2650.17061168164	929	1496.96483641469	2901.54286008312	2023.94778274844	1399.97804179173	707.963273177471	1328.92107685242	3162.78933914335	3780.05936800613	3198.47201904184	2043.12064859768	2671.61432446493	780.330804035836	5175.57277727191	3134.55777685721	1414.72704302901	2452.53391763703	1559.9760842091	2419.50935951221	5393.88560447453	1820.86031758924	4622.99939487071	2400.92145161971	668.565610153113	1348.66973318691	3590.94095770085	569.5099255312	1732.99549937635	1049.82864789769	1372
ENSG00000023516.9	469	230	331	552.001429611728	623	1085.52514381583	260	780	633	217	415	250	105	73	429	164	937	547	897	403	509	572	863.016577985104	556	225	412	1077	1343	951	748	1170	237	1571.00214831497	1087.00263338182	582	1074	643	933	1366	337	1680	974.00152358401	177	590	1165.00176955815	298.002002881846	541	250.001071378504	541
ENSG00000023572.9	205.187565836101	93.452711651775	163.745067215824	206.272947449833	299.294996758721	331.192215971804	143.102104410676	243.951788380331	322.98294521922	85.9275116080505	256.239044520144	108.917916003032	88.5116971010793	88.9800647788998	215.46280706083	83.8668069766857	397.49525325469	173.003325737496	340.171436951138	135.117731581983	224.257406419143	275.279743404603	267.956063467739	209.393779090557	136.946978161292	213.878337102396	476.794742970534	484.006707105967	394.361039274364	270.36208458366	388.870510802178	128.894828660339	571.521294750512	445.637301590212	261.295895037705	386.456925984589	247.16340467303	629.437927061166	659.401711490065	229.854638852455	453.948172570641	365.252777494688	148.050598099403	198.995061823022	362.637901986159	211.672744380413	169.623619207283	86.608006531553	186.100955907664
ENSG00000023608.5	40.2994752493624	44.8720567593029	44.8264974483056	55.746783451377	92.116941957381	89.0515021407728	33.6673709756212	57.3105273728571	77.5751821437217	23.6976786624106	46.0702515032741	30.4113395854206	48.7516250336208	35.1756025511305	56.8601128591695	40.7950367435149	113.756192106918	63.4543320359214	60.4373783594615	28.158777129126	65.9522556123257	75.2784802596163	79.6928974348732	68.47514069696	18.8164013719305	66.1660636141323	142.30841621457	173.163388194426	105.215124238541	51.636926916048	93.933342552682	33.5854405406088	137.898614083272	88.6950928356207	88.5496280932952	83.7938015544463	66.3907758256028	145.728418656884	170.943649295651	44.1604059742793	136.797688987942	162.929246649559	36.918403293378	63.3073423018044	89.0523163266338	38.3189001541965	85.0587641805324	40.3300854709105	39.0314095057841
ENSG00000023697.13	235	85	164	207	319	276	158	215	318	90	275	100	139	63	191	81	277	181	309	142	159	303	197	178	148	152	395	311	276	225	368	137	427	328	239	301	199	499	401	180	391	337	120	215	345	119	154	174	180
ENSG00000023734.11	961	477.995915708231	747	960.948360684647	1134	1272	766	877.997606758468	1294	453	1052	389	515	287	914.920104974735	617	1125	798	1317	754.966786520662	892	1196	1149	1006	642	773.922433632601	1748	1734.94296889842	1098.9888816469	1147	1780	585	1762	1555	954	1745	1222.99207224354	1906	1812	1108.97588607729	1697	1475	446	926	1718	701	766	519	857
ENSG00000023839.12	97.3452109791847	63.4552745478367	69.4099358456593	57.1607313404885	93.0355796316766	135.117288198139	36.8915176852097	68.107389093713	98	20	86.6775215366909	29.5857294748234	31.5858729786231	47.5294457339935	63.9488905044528	28.1367744870447	94.2151322858302	52.2109626684958	68.188273980099	39.1841511358631	54.6822746279407	60.4968781334375	91.4336546351393	68.1802484994422	32.869362044253	47.7540068828948	162.078670192933	136.811023155551	82.5246923186581	90.7435453224454	109.121046339998	30.9428541294065	143.462946365951	65.2544814334508	65.7102713795908	91.0865757434991	76.5175395701587	138.482686161407	118.170905627585	53.3175656220368	162.662884806961	131.920742426808	18.9010539536305	44.3168448243397	101.472381090828	44.0760243252224	24.4562531566156	17.5772649014458	66.4845918309486
ENSG00000023892.11	4952	2513	2865	4702	4471	6667	4294	3712	7106	2580	6465	1611	4683	2318	5282	1996	5729	3309	3824	3286	3340	4253	4530	4660	2966	2509	7023	6504	5450	3764	7900	3417	7538	4471	3904	6355	3918	7623	5584	7480	7605	7019	1532	4040	7225	4304	2836	3095	3079
ENSG00000023902.14	5019	2878	3406	4101	7081	7565	4992	4387	6598	2625	5535	1526	4405	2028	5014	2339	6093	2953	4551	3159	4042	6255	4781	4248	3066	3810	6766	7190	6507	5360	7844	3243	7213	4058	4569	5098	3841	9676	7266	8211	8137	7092	2400	5355	6714	4306	3084	3628	2856
ENSG00000023909.10	261.392704860124	148.660857456747	220.752207981804	273.511780703271	303.067164246945	366.903542430459	205.270646368332	251.392488561691	387.154739967446	154.278212207584	308.814659128497	128.143851189713	147.933308616327	120.532085143734	265.677690816765	175.558348724923	318.019562801277	235.598421033044	381.532300374743	207.51907707762	296.888120119351	234.797805474449	284.942418676885	312.346100444708	140.749634666667	191.291628609265	422.693698671141	530.662267048607	341.049728931348	311.325896382477	537.281412427735	194.80509632275	527.988721349245	539.908138281072	231.336004781703	508.654780048706	363.082843469932	448.906472347029	523.384865519323	273.030479326794	454.988085734254	430.124874139545	159.749459837644	216.411714675214	422.064222625563	175.415932616268	200.448066484625	108.533361561673	172.643399567104
ENSG00000024048.10	3413.21616860538	2269.33924534308	3053.00542434951	3742.53931895639	4299.65636554215	6721.73121308042	2118.96169615341	3557.5933463075	5264.4943284871	1521.20397236131	5164.59860512648	790.986982972673	1613.6778921377	2613.20402957732	2736.55490116751	1403.75015508555	5211.44127068059	3126	3332.25760643892	2738.83845198413	4161.99328908502	2917.29596981006	4209.04662005063	2991.44022220427	1997.75530129975	2377.2942931286	5714.27398042984	5810.40599473055	3886.25808049525	4580.05575824501	5254.2752594103	2022.65159289599	5972.93271846652	2248.12737972386	3143.61037363912	4695.0797885922	2889.99111632151	7071.02959499101	3935.79282005049	3290.60621877921	8093.82512388345	5679.23266308584	716.683008159825	3301.01715104428	4962.42984449461	2149.65838975938	2332.91495193757	1698.2785004219	2433.00368848841
ENSG00000024422.12	11.7790223416853	10.0974708271223	16.0853284580862	7.52291873568611	4.25719541683772	18.7615515672038	8.78680917642141	20.9328655481167	10.2951611218018	7.41928192372864	18.8062122328051	4.10092751288674	10.5484391932056	24.043906687859	13.6025380803876	4.36612142187155	20.1045528472014	5.34449691287299	5.25229110166296	4.24188295660635	12.0000979516982	7.1687288996593	15.6797678718381	13.9439572608875	9.06354703250322	8.94958906695995	23.4998375721652	16.0709777644616	6.01832742790083	18.7163430602647	17.9510790054334	21.8646450566377	15.3605788828675	6.4170913308118	1	16.1821213441184	11.6615132166044	9.41494019225166	19.0495592682171	14.8046147529362	7.83873902897221	43.1911997845874	19.903777633021	20.0625447862207	22.1096492722996	23.849035829525	9.69748264877224	12.0003894858931	30.7275538588662
ENSG00000024526.17	2	5	10	6	8	9	3	9.17329633055812	6	0	2	2	2	1	3	3	9	2	3	2	6	3.89634864546525	6	0	0	5	4	9	8	6	5	3	3	22	0	14	0	18	10	0	12	52.4437966708945	6	4	1	3	1	0	0
ENSG00000024862.17	705	344	509	691	918	1002	648	605	962	270	1073	175	479	483	594	328	746	548	718	395	766	673	738	489	459	478	1228	1020	743	836	1040	427	1096	763	592	1014	559	1698	993	843	1237	831	215	622	1184	645	411	425	552
ENSG00000025039.15	410.77684400762	255.716506990078	379	478	593.890789570792	830	334	285	740.855546211021	248.930653691385	765	75.8094688925065	254	269.855078011439	328.579490644299	176	657	306	469	271.595056092083	514.795692323903	510.500624028859	504	272	252	343	694	645	462	515	811.887552241769	295	604.869714051658	254	350	595	330	929.317125490147	445	420	668.627667294949	663	80.3688715538868	332.836893639606	455.442432105104	295	156	245	140
ENSG00000025156.13	228	81	126	121	120	245.967904511488	93	174	182	48	99	70	42	43.5982515257131	184	52	223	146	215	87	137	170	216	177	63	95	307	364	252	178	307	57	340	305	192	371	185	263	380	111	440	230.956952427146	57	119	278	79	143	76	154
ENSG00000025293.17	1223.44345504999	734.592729972471	988.582420477292	1326.35057978978	1215.58043475565	1727.57734505606	778.535015489971	1113.87900307188	1725.1260271341	664.036624274146	1752.56199846885	404.031750290265	948.167726599929	531.949175900833	1158.31539800029	477.170089584394	1564.45537430445	1079.51311512733	1255.32369574016	1072.82428928704	1183.22067320585	1475.51096760902	1740.58047129256	1269.82534057499	712.212574402001	935.488140360735	2214.46796291703	2169.94291423761	1804.88861178058	1593.74835324031	2367.25206526755	983.159631400781	2409.18222089807	1274.0622304148	1227.05043019309	1856.74476145304	1256.98357139435	2366.82971808386	1676.20243657471	1874.24608416194	3098.98681024004	2170.11061073013	693.317971681073	1344.75580931666	2417.53015298009	1195.73361120792	994.796538839931	840.112984541658	1104.62785376687
ENSG00000025423.11	10	2	9	5	1	11	4	4	6	2	1	11	1	3	12	1	9	2	9	3	6	2	10	8	2	1	1	9	10	0	5	3	11	11	0	14.4658372298173	10	10.0929042754913	21	21	19	13	1	3	11	3	4	0	0
ENSG00000025434.19	84	54	93	95.0000000684102	129	172	72	112	132	46	98	41	123	35	119	34	140	54	103	56	58	104	91.1583097266447	80.3227817780148	49	87	155	207	132	90	138	73	153	106	125	125	104	185	148	205	203	202.197444517555	46	97	205	66	49	41	92
ENSG00000025708.14	9342.25917447367	5470.18103366974	7042.56560842001	9979.93535327429	16508.4315373955	20531.0303717698	10598.1410397381	17696.6540853399	15593.0878394156	5947.50218393812	17793.0220308929	3394.0017490539	16350.0285006351	5845.31238668109	15773.3034114023	4233.01895063317	13435.9001757108	5322.57004246841	10821.9311724244	7087.67589704686	7249.58327275937	7991.20433176353	9458.63118510509	7200.58914438959	5776.08179338859	9252.22010692527	16843.8199432667	16457.6426681951	17616.8539351556	11345.9971975562	20649.0507377773	7432.61028682222	15567.2334641015	8106.66939866382	8643.16589910858	11493.7606722607	5819.12033937627	27373.5844891597	11722.8409640346	26804.8120950936	11506.0783591227	18736.7409207794	5683.09183145835	9888.37290889617	11964.6322693394	12981.4397170519	6745.71933655849	7468.03252824021	4988.90378095941
ENSG00000025770.19	647.454597884398	428.087360231526	474.624303702345	731.59192404951	801.030194790657	969.203773118905	719.206621690789	694.827651546963	1037.41508911719	412.263560315184	782.285407854596	371.354441276494	628.132894342372	264.486881675956	954.399072762774	281.144407192434	768.799459616813	520.533509026104	656.729951094497	596.359818979067	428.031226999467	751.169696275371	908.376444438124	896.7737773052	452.020033612826	533.781595174434	1155.12309678122	1170.65273176017	978.4704237259	766.774181268751	1226.04582119202	530.022867958261	1559.26357790933	1032.66247189964	682.744662725474	1170.73701403063	801.114830137117	1586.84195238436	1231.07422801967	1339.00872350288	1441.04249104217	1359.92866701244	494.287352475751	891.52347844374	1507.60203474909	710.37233802097	496.99203789321	640.142822900958	611.045459314462
ENSG00000025772.8	227	157	183	164	266	300	212	217	308	100	234	56	161	99	261	89	277	220	247	150	183	433	323	336	150	79	385	401	306	212	538	156	389	183	184	397	191	453	338	431	424	379	118	232	474	203	171	175	200
ENSG00000025796.14	750.125805571837	436.453704133606	624.774214990632	814.168557285183	898.14740282464	1124.66840871486	460.685592335395	884.303426572211	987.003835262916	388.279359021107	923.546445404951	350.076191473892	336.153297054463	233.628506402459	707.232210442933	324.136939549052	1011.5461187298	710.106489295583	935.628597906765	539.424363356959	694.868099837807	1020.74781149333	1088.71438461092	990.548848992052	442.439919815431	622.253802576023	1426.67260704646	1669.45996454256	1235.74708954442	1024.56318749827	1790.42795025861	495.658144003846	1751.89580962567	1340.45500483909	641.608665408726	1358.43206799699	843.28592294418	1513.33336434743	1462.27059651677	991.785400497701	1884.14587579337	1363.38967357208	274.419543420945	951.392190142675	1648.61976730495	724.735663235533	655.532721001746	486.09658421161	627.326853680281
ENSG00000025800.14	1256.37878261889	832.426019482882	971.353181288446	1427.52625461199	1308.45009810456	1768.94983959499	1013.9588836973	1337.56409555492	1676.53207500023	770.77641795881	1477.11167624067	592.758519425689	1161.92284320113	491.105668467409	1694.11564840633	722.556439551861	1462.20814560312	1013.51987740208	1258.18622360423	1019.46329033648	940.791728530631	1326.44454151822	1571.20926039103	1701.5649592342	754.889587251175	998.996704157695	2189.43651060417	1999.59769817684	1739.44720762275	1397.98895732426	2606.78291955403	1067.72320001405	2471.02946656031	1576.0751959995	1151.40461533459	1966.21611876471	1401.99131774146	2126.19536620301	1826.96253723041	2089.52536834106	2636.33014744582	2168.00679958699	845.920527653947	1390.63143788363	2650.8204843456	1178.0750138553	980.898514316449	781.499513311962	1080.70478063978
ENSG00000026025.16	29013.0727340311	18676.8564550687	23261.2674286761	31021.7744288722	36515.8655404824	36824.089993715	24714.7034972215	18310.5070909488	31742.6245809664	15715.3104764033	35857.1223945739	9505.94296642354	29787.3475687697	19023.8460639026	27347.4246789984	15624.151874147	34843.7635768205	19843.5507361097	28678.4021094454	23626.1287177087	24683.3728422002	34683.1923050053	28642.1968546305	29585.7128098881	14641.8396444771	18692.8687542724	44383.5001991793	44290.0247773405	24156.0538742207	24873.2355296792	51347.7111942859	24260.2808175515	36084.1093277082	28476.5542059654	22227.8745523465	35377.7697984101	21423.1588329873	50853.5225226684	30035.9240495083	40900.5998241696	36799.1559052229	34024.0823258869	10391.4884195549	19018.3758816789	45890.2762666947	26346.4101017238	11932.297009294	20821.1791519374	13723.1262702715
ENSG00000026036.22	165.968221112708	91.2319870393398	163.431715164236	152.079381341941	264.112965905164	220.687453411662	165.288619359931	199.323672256292	245.950073465567	66.8587605251889	108.935952747426	126.525829759134	67.9012995703816	27.8929982644683	258.729054603672	90.4226927781509	135.77807755456	94.8205551478354	113.926551347246	120.040650445074	122.315023409116	155.618987939564	223.936599877142	227.555078283465	104.164033622433	117.519051911337	321.037894797132	184.898168427971	179.080587473861	146.098662241097	336.484037546667	135.344700908227	314.55901484939	223.36128188311	50.2898548531961	222.834870860072	261.967461780654	323.126922510151	387.682045732966	177.722805809775	300.877525287324	336.421642065201	72.9070077176361	357.835851958733	340.677486164726	168.827442085355	131.538201824431	49.6522937947004	87.8618767067092
ENSG00000026103.22	769.732651669638	449.191154728227	933.191433954537	784.612814435687	1039.53359587648	1368.45635035184	530.381883674536	882.342572639542	1497.64626965816	264.428802295756	1176.46473693398	174.979867847711	227.716848584664	486.151745574734	727.557846729836	358.552336702631	1524.74706618314	836.483200318872	1303.37813579201	449.291841510483	1109.11851772228	940.295744300155	780.511580880507	592.306880044702	326.076710339528	788.787229014891	1429.51484700449	1751.89245304168	1271.1347640586	1189.45923945073	1325.48413169557	438.778629055543	1272.82690559278	782.214580893507	883.520731829586	942.14695458162	822.021498167711	2487.31012632751	1539.67731369304	598.469007413305	1665.86139830384	1695.8960433204	209.536507123788	810.64980754288	949.504100630138	319.610937186308	689.817347656895	344.947394143419	552.280361186999
ENSG00000026297.15	13949.5532982367	5442.30703231011	8145.19220319124	12773.4520236332	9069.31638624189	10035.3141189591	9006.05755967031	9968.60961261209	11133.238074908	3663.09545769915	20274.5771927359	1944.62419698669	8818.7511709962	8243.15233097397	11233.4118046555	5932.72739366421	15645.6455359335	8239.96927346589	6871.5926569702	11302.8645135516	8614.83262120328	8478.82102064916	11620.0644824546	6057.27014761213	6748.70474816876	6728.73343547649	21385.9895164886	15144.573828363	8616.61768235442	10426.2062074462	11479.5436351072	5864	15293.990421152	5233.07571484874	10005.2464600181	14095.6995963773	10259.9765750394	23279.1473874271	8356.4608370413	13002.7211652405	13793.2588199579	10443.52964723	2335.84465163477	9270.70404281415	18903.5797244297	13214.85640278	5744.12577288234	8785.95018363763	7419.06331367324
ENSG00000026508.18	8010	4708.99763375217	6911.99046472434	8319.98872609168	8712.75537068483	11763.9403133769	5045.98705384726	6720.96885915399	8999.94705757131	3316.99716580009	9501.97818322534	2834.97601190792	4921.94413179616	2324.59724483941	7579.92832868662	3737	9129.92003668493	8242.98326696227	9338.82591555983	5636	7843.97056432863	11825.9856231239	8851.76593081779	8558.98847781152	4733.97807347302	5192.96037779893	11947.9511298833	17284.9485239382	7793.98901834323	7806.95464978928	15621.9489437481	4855.94113843055	14662.8271819986	10443.9911724855	6019.9718994433	11736.9829792713	6795.99121304748	14642.9949796895	10406.9223042909	8996.95421723957	14059.7635226698	11733.2924980759	2536.73940733591	6565.99266205109	14326.9908827133	5955	4224.98101903458	5090	5871
ENSG00000026559.14	103.690129428224	21.3669446908207	32.1166914417418	105.583652818962	25.4705688387059	146.887299353174	114.358637032038	57.1999760594932	74.3422495324815	25.0978023967944	15.5064048946403	24.1073088735841	14.3626664004555	18.4234366146546	32.3522402364244	15.049331098029	113.603951121223	40.8309864875738	69.5401424785701	28.2849170448328	24.9588718266543	21.2336051091468	87.8724518483994	115.827371515816	78.4981459643682	91.2794197433232	148.436686954634	52.9913450503801	78.2290648145911	132.38312437338	121.298818687522	36.508888046002	319.011632198715	53.9004360853627	57.8010210674605	43.8164185124999	45.2053757238163	20.1866143732142	51.8126156334757	31.3999174762073	239.031455053855	180.37875834538	30.0112994222512	116.155475714651	314.55307328042	55.5598967668481	75.9632531956298	87.1489420437912	103.45472928865
ENSG00000026652.15	252.004317503509	197.008532440999	242.449002474928	235	410.007765287912	347.003950224384	266.031367832556	333.006536634775	393.12668972768	171.006594297543	436.042995731823	198.006562814756	273.030909856643	98.0286053920592	317.017869117491	205	371.006068209263	173	481.015415413538	265	262.123946038184	233.005080298764	271.005922633758	431.012203288292	142	320.008860730125	650.228663386285	736.025970283948	384	543.007182482053	556.001410175829	252.004892173809	632.009549543685	580	266	690.011660482627	372.009665544044	930.040491762998	637	404	678.016933220617	569.029012496713	146.852017815736	385.008104760137	430.002129775594	257.909469333446	182	144.001831389114	318.020913952987
ENSG00000026751.17	618.727891826712	518.224637955309	773.279490412279	539.941127034602	1182.43443009396	1142.13945470991	805.305855004903	1372.32580610974	1125.75665619289	365.747768081561	741.606785805276	670.902218670908	494.595903785576	220.106554247887	987.037210809654	486.24082043754	1004.84477808877	786.069196062679	1238.687037989	694.092626954282	805.804911916563	1781.28604425543	846.057375862039	1416.14354694544	363.749741290838	837.815683056949	976.60364739094	1857.47111154978	900.258326708569	1288.90812763703	1389.26743982001	715.332584146257	1941.80384107107	2441.60138178701	572.047116541145	1575.07961001803	1346.33286369805	2393.55692906043	2261.62184565336	956.416347000511	1279.84691206794	2129.65557029152	486.544526864246	1304.48388271733	1190.81512593166	289.567822773851	548.982043321874	328.800706101448	1131.80410340032
ENSG00000026950.17	4105.56516304532	3738.09290958505	4261.82734722171	4347.24394595534	6170.75738818016	11525.8952048386	4530.07733987255	6098.04852918973	5486.3810023182	1648.66326020703	4878.54893389924	1940.51455858755	2300.26881954748	2437.68623333122	5996.77621634358	1979.12456969979	6687.64215114925	3223.62797744933	5159.97147886395	3307.3134781867	3804.62827365858	3855.06136745379	4860.31448547863	5271.69889364583	2396.0184528541	3384.72040453797	9809.22006373909	9005.2588982803	6974.76571103917	6513.1289362003	7740.00318603049	3012.83763690178	8285.8851435246	6022.29088508684	4133.56485991068	7953.51990377998	5216.64007095942	9604.0553386719	10390.4754966305	6600.88092636612	11366.806143157	8823.86623112852	1491.02835547395	6309.02350206338	8007.03678587479	2353.03337295284	4331.22009679254	2760.33981918358	4620.01501720945
ENSG00000027001.10	41	46	35	60	64	116	52	102	72	23	65	35	33	10	65	33	72	50	62	50	43	97	116	78	38	50	116	122	87	115	121	47	154	131	55	130	79	119	124	133.989247166882	163	115	37	82	143	67	31	66	58
ENSG00000027075.15	1700.75270533498	1245.70297210696	1580.85421462217	1963.29070078603	1624.82657245021	3054.64458012501	1517.49699065339	2488.79825315318	2216.96612313314	1163.80634397372	1710	1126.83970310668	727.43769433149	478.607373488489	2006.19716576235	902.949236603582	2183.36418883516	1976	2153	1630.50658003621	1642	1245.5772936307	2877.8388327074	3108.74446806463	1169.2421998413	1147.48960704441	3087.19427185938	4166.05473380654	2107.20412474769	2481.69246183438	4265.87541953388	1536.59570971272	4694.78542332366	4166	1790.60323448747	3989.2159126038	2696.15693447266	3363	3525	1921	4783.87880058326	3489.1208045173	991.022293411213	2494.44517366743	4628.52040828502	1229	1553	1299	2733.3232606932
ENSG00000027644.5	2	1	1	0	1	4	0	2	3	2	1	1	0	4	0	0	0	0	0	0	1	0	6	0	1	2	0	4.15752481560298	0	0	1	7	5	4	3	0	2	2	2	0	4	7	0	3	5.09674746481862	1	0	0	5
ENSG00000027697.14	4723	1599	3172	3138	5392	4521	1708	2718	6358	1066	6717	819	1438	1975	3291	1251	6797	2719	5315	1654	4344	3759	3735	1951	1626	3240	6279	6349	4614	4098	5131	1555	5315	2943	3278	5109	3066	9093	6347	2605	6120	4653	823	2458	3538	2076	2176	1220	1725
ENSG00000027847.14	274	188	139	263	331	390	232	267	364	111	277	177	282	88	386	102	325	194	309	222	224	353	365	313	220	246	484	505	298	269	504	421	550	407	191	480	251	479	512	476	454	527	109	354	472	165	217	187	172
ENSG00000027869.11	382	410	300	348	419	558	536	493	501	465	550	548	496	132	659	358	498	390	427	403	367	216	620	704	293	250	797	697	489	710	674	420	1166	1227	373	933	694	1356	809	803	969	822	484	911	835	509	348	283	633
ENSG00000028116.17	181.815861360111	95.6173977411835	169.843326303087	167.142076301379	299.829262112692	329.521654747726	155.496440810276	256.362257687864	268.43698458831	56.9340895037697	173.544359929809	56.4853272123579	77.5755020803827	54.6050448752367	161.84364190005	87.5428755631477	264.592372627362	149.636790558464	310.956803216115	114.085982915628	162.820440174399	257.040746531757	241.16683874864	163.092038393769	85.6157477124552	149.330541401235	305.406024641224	411.072975251065	302.170668125102	280.457787315248	365.396699868528	90.3363740943673	405.727766767683	371.27781110065	114.504756331377	299.59334466596	268.067060718511	476.41010205178	569.015019499742	213.237454369656	363.431949191436	429.475928457332	70.5429642873424	194.821524599177	335.816719672239	110.503700592556	240.01469633263	66.1610984357563	207.195980553398
ENSG00000028137.19	14640.5597075713	9308.66435019707	11696.8951050818	16348.1146712577	21078.2108653077	27807.9604129868	13943.9908628134	13803.2067051476	20818.7221325979	10499.0570800957	28246.5170580199	4614.71023850766	17132.0053726715	9961.48361929951	17800.4035060424	7124.21811168103	18884.7268445258	11009.143045232	15175.8113382901	13426.2044523048	14609.4391239297	15508.1731105224	16894.4995440171	15320.1098658911	9329.55435320198	11689.1275394785	26601.2829697241	27425.8699011801	15296.0758755644	18528.0928885844	25967.5964648148	11752.7340413335	25441.1492682474	10917.8958726724	13665.0070109059	19136.215222579	12108.6163617664	33301.7697229511	14000.7992678099	27837.2430397049	26312.8856764891	22786.3409698564	5797.52040269163	14489.6962341183	23510.46147229	17694.2856763149	8104.25964422207	11229.5937039038	8597.72397125101
ENSG00000028203.18	186.172151881465	156.331319550685	199.862018101001	249.980641889707	269.46006814867	351.484166693965	117.252641317171	256.324225907841	290.123566639349	94.3060600347802	207.183681293115	128.393485398451	81.0283425283949	42.89555999332	266.074262256903	75.6796118975508	401.454988556473	256.464474573041	376.329996337215	168.132069053441	220.127992949744	333.085839770835	325.342945020296	284.892618813765	95.1432625645456	218.83972572852	458.641843011808	568.819191723165	339.66611604995	312.813485822013	469.805101335804	130.089395906089	668.818543777418	604.254622950168	237.46667755316	505.517691942302	257.965895927096	434.484225684801	628.012852525996	202.903307774022	690.641604097429	406.579295759144	125.252875726814	192.775477059677	492.646995632142	119.380868849346	216.745193148603	96.0032769521154	206.317560655766
ENSG00000028277.21	3366	1896	2235	2882	3630	4358	2354	2750	3849	1722	2994	1560	3746	877	4314	1246	3450	2300	3215	2604	1953	5433	3175	4019	1766	3007	4240	5390	4738	3011	5830	2436	6629	3639	2269.99577419686	3654	2691	5082	4765	6655	5099	4728	2831	3423	6782	3273	1838	3233	2058
ENSG00000028310.18	695.348253444397	420.479851966238	528	690.35686909529	919.371941952613	976.894492007782	578	801	1084	361.573490162124	819.835164709167	426	610	230.762774239005	1006.3555237423	374	918.98068381298	612.967696148188	877.385397891975	541	568.506149882987	940.166917750912	864	938.49175081304	385.8648256573	598	1562	1402.43377214844	1021	1019.76921405899	1348.43832624666	498	1940.07561565105	1244.89541747709	704.828251900747	1271.95513977675	860.764376793627	1470.59475150494	1549.96280999488	1266.9880338495	1732.0308936043	1368.84992298394	429	1000.9874994837	1461.4883504576	709.954196294428	665	599.679697428312	682.399010742153
ENSG00000028528.15	2705.49969380706	1787.97589719992	2292.23001991513	3110.71092074316	3662.17837681056	4041.33691566769	2370.51121134926	2663.88765832593	4014.71135686728	1217.46150230382	3619.66887716784	923.788205893163	1955.11844791022	1398.95103673213	2475.51951410484	1178.13864714926	3416.88302342531	2241.90473865841	3044.47064878371	2000.44081678234	2436.93924014486	2994.63245994961	3232.22009511256	3004.92024280764	1657.22480588113	2031.04339496737	5682.61078972142	5412.35072436698	3169.63182653886	3141.44591461387	5203.98933591578	1683.21005392913	5354.68912105277	3172.06249601895	2450.50188509179	4181.43818469309	2618.84269530565	5655.12582505418	4403.85266524695	3777.67665055756	5325.47284057737	4172.66511007474	900.384408666733	2839.18134103325	5144.23000396066	2223.71205041187	2043.55224476154	1675.24484277014	2055.05551467145
ENSG00000028839.10	293.049001449268	170.40557699006	257.017086097746	290.851297796125	312.026772120766	411.257784501359	194	254.947848013831	395.032442659865	144	323.223665169751	107.13453805403	144.026920510145	129.31652617452	242.481845819241	169.067795357575	407.591788583572	274.417620774632	381.623691598019	234.00526033429	291.020544333132	325.888744435739	318.919224219998	223.37856388528	184.033354516054	238.465831138335	528.063137373573	513.679009853895	374.476465384972	336.236752069198	474.299299506991	160.359647321465	467.966911158722	396.025382544313	298.462392866288	462.044173289956	344.645273687122	551.764420242297	589.784305076078	253.149683797719	507.463682662216	412.824598379609	101.201753237141	238	434.793981896995	152.795134247217	234.029109374512	101	233.657739334926
ENSG00000029153.14	60.094157987876	29.8263028313906	25.4023171365824	50.698935470494	89.7735506303398	77.399436778445	47.9392693688891	42.0044985862059	67.4714356210559	20.2557052352567	97.0427698937501	19.3918221219093	53.5257222263834	36.2728460366914	57.3515436170011	13.0871472785795	71.8380531702784	39.2762892764419	73.0370751759833	18.7225377058571	45.8284871602184	62.61069177218	66.0953419855075	45.8840519404393	22.4331790450054	49.8820086144457	88.8320376165508	101.649381898811	107.637222958204	46.7840021901444	50.2101809476402	49.3045496033869	73.7671637810644	50.1830730721475	54.9580714876498	58.8617934584426	31.5930501789619	110.954062668699	79.1354251856452	79.9830953568588	65.874021236523	167.998560237277	52.0871262180968	35.0491806269055	72.4598301226845	44.2889690048613	39.4448436779277	36.4457448001013	54.6501556997903
ENSG00000029363.17	2000.35490087069	1294.53190473737	2158.3543949699	2417.97952340783	2442.79448950438	3363.17662804062	1378.59679979501	2620.40554758037	3196.92361607675	917	2549	728	688.910162222452	780.068067494397	1761.13017458511	800.190672034795	3160.59904756305	2209.19524582727	3087.45075520076	1695.93547654985	2505.86183656476	2313.73229789697	2946.03622507611	2264.41298565002	1199.10652822328	1803.10677903576	4536.71799536733	5207.7754547539	3272.55074737665	3118.24953094167	4293.39342353638	1169.01742279397	5115.95782190821	3255.32648953849	2071	3758.3750886823	2414.83948196059	4333.65389332926	4501.98997018551	1979.5923643947	5755.70868444832	3698.90654638339	705.314658837211	2336.87047309734	4007.96594596107	1196.71871591717	1876.58908969806	965	2082.8577433559
ENSG00000029364.12	700	483	571	807	904	1151	531	812	1091	366	1027	286	413	311	725	393	953	590	1041	527	630	1053	1024	811	432	551	1317	1609	903	983	1570	504	1664	1155	628	1219	755	1529	1272	978	1537	1199	256	693	1404	694	555	426	686
ENSG00000029534.20	467.508744277413	491.147531392684	677	325	606.592805171508	261	491.047364946491	747.040276714067	505	1001	417.418002875465	889.278532303362	552.806380797266	128	1000.73338232469	2689	185.463475910911	643	718.396224062027	1264.01667475287	563.030486673688	684.351951962989	543.626101224884	1170	689.010148676712	874.042885737503	567.016817953506	461.10900395999	660	478.311124534071	916.326754070455	1002.88364497129	507.522061950742	940	588	1046.92892949602	2487.69094189326	334.183698565082	467.093307241392	764.356960171492	344.412124915506	571.750029931883	812.446852777362	760.552291769388	689.351655203784	322	494.524420573444	439	413.128973954954
ENSG00000029559.7	0	0	0	0	0	4	0	0	0	0	0	0	0	0	0	1	0	0	0	0	0	0	0	0	0	0	0	0	0	0	0	0	0	0	0	0	0	0	0	0	0	1	0	0	0	0	0	0	0
ENSG00000029639.11	121.063826721374	79.9821297001968	128.348705477044	142.390781596942	304.548653763123	253.24380691447	106.162994471867	154.953641689316	242.580996987459	72.6356045069107	175.854238672215	68.6433310080222	99.1670061717169	59.1101643375558	141.756632948012	55.540731558324	144.137942482368	166.521047712761	190.158057482655	104.01485380567	104.981511728871	161.943189908398	172.210655888911	162.542995661949	81.5613512587214	131.756488910706	284.721030502659	280.026211217616	189.316044786562	195.857251836728	247.459857159224	103.658992618296	320.782032754432	206.326279719536	190.112131006741	290.314503481187	132.918734099046	315.547059287585	414.306753233759	162.032752679554	387.832094699189	250.794946946387	62.6278378751015	136.342297931124	290.47640552057	96.5133186799336	138.615390616147	69.1142686291938	129.565620583032
ENSG00000029725.17	894.974727843359	442.339205030578	627.781744938241	779.14147898381	819.870355403335	1481.13914065892	454.747957732055	1028.96046855422	1039.13746759804	345.83037945028	749.063115716557	303.47893840516	268.108085385255	178.109814120458	616.519265357107	281.381983728936	1294.25124257762	782.190218758506	1181.69308238308	525.153467637594	710.113599418796	993.303316555625	1174.75148124111	889.75303793331	379.028199415945	658.378985496371	1788.24042715936	1855.44011139474	1430.28899367686	969.014477034067	1524.1393401217	377.512454208059	2275.38112568808	1389.73272454275	674.650656120927	1411.386665914	957.430385981991	1667.77459403219	1809.8638572378	687.418094089391	2279.30040770631	1332.97384293077	266.802472490962	891.348656550678	1598.93639468045	432.584731767546	955.26963371588	221.336496279561	761.178845431553
ENSG00000029993.15	30.8167937944882	22.661452527487	33	41.2262734812016	39	37.5793666968947	53.4572423994121	35.5733916885935	58.5308167121131	26	29.9190851659628	22	24.6218629689175	23.2415891498692	53.6071050741668	22	74.2312612588899	37.5908466185298	51.0355131026086	25	31.7331116868467	104.229301717935	45.70940170861	49.7934555294872	29.3184882170009	26	111.963745883024	77.1967334134632	66.0466466424449	60.8933788136714	55.5488239995744	23.5057181405318	86.051685033181	53.6076473813038	37.6833198739255	65.8016630920243	31.538932842444	143.359118895589	71.9289416479043	53.7255205573732	79.1149897428476	129.384601416239	23	46	78.1920956732829	48.8179489290987	21	43	54
ENSG00000030066.13	596.098522297487	317.029586310566	458.565060691332	564.924030643027	523.046845445568	1046.01370063333	346.877037424705	764.384680506494	701.825799461502	264.864721337227	594.296784235189	206	236.803528203181	166.216131160649	498.628761513818	208	713.794280831416	557.247304088316	668.45392070753	478.108647418983	416.778613024409	803.722315356907	779.710886435056	779.284947666508	352.017734906755	429.132039015073	1141.25394823251	1151.76926727733	969.605531335262	751.010323771999	1242.27212956305	375.469180463579	1503.97371977048	905.098634252662	557.928601758904	1053.18347960609	648.744266834548	982.384272464496	1051.9933355564	644.428968454891	1521.04657730527	1200.48513221728	182.201089610949	665.240630691468	1263.49422961007	464.284257269468	673.383504041449	365	742.218977078974
ENSG00000030110.13	1075.02803230504	576.373092043683	594.483794848525	786.253829040122	1131.67737342052	1446.60581604394	1279	831.535399449979	1312.02218044019	467.561459507084	1422.83311311933	381.816027540822	851.546445376292	502.589739540165	1131.9290961689	592	934.381951013355	591.404030296932	1054.5931288444	667.003562087775	569.607531978269	1118.53602898607	737.388069183042	924.999240823559	738.170729666342	530	1381.6625077901	1561.37566311948	1122.86732234322	1128.69524040233	1350.77804497094	877.570441114637	1589.84339992302	1118.37632614939	643.894735029014	1218.62241415646	1007.85069885435	2444.65050181357	1570.21758565132	1695.21730571312	1381.20254188408	1935.19262873385	401.974739652587	1123.40523010992	1503	801.662105050846	789	648.682891392873	648.781196270704
ENSG00000030304.14	1	0	1.00805756437731	2.00568304065464	0	2.06083348791352	1.00472527749553	0	1.0005564160181	1.00008224844608	0	0	1.00031669763891	6.07323978959391	0	0	0	0	1.00369132322101	0	4.01064355567793	3.01035915338265	6.05279682375241	0	1.00001523449321	1.00088664719277	0	0	5.69390046437712	3.00149840853717	0	3.02297847785088	3.01260681326786	0	0	0	1.00480694996846	0	2.00549235762535	1	0	24.3162339279183	3.04016976399947	0	2.00553416035077	0	2.00010023388989	0	0
ENSG00000030419.16	223	98	119	179	200	373	101	296	372	84	128	231	69	23	154	45	261	282	429	99	121	155	416	248	80	193	340	624	373	329	506	121	505	939	107	431	237	316	621	146	547	463	106	195	380	79	216	115	244
ENSG00000030582.18	9044	7812	7633	10769	11345	17763	10091	10497	12174	8165	19180	3149	13288	6697	11179	6419	10772	5829	10088	7908	10370	13632	9331	10350	6466	6690	13590	16453	9930	10199	19911	10736	16883	7724	6955	8986	7875	18870	6222	20766	11616	14732	4266	10605	13445	16646	5607	8776	4629
ENSG00000031003.10	729.642543893942	386.241202514574	639.003777927257	911.5591182559	934.012697118194	1437.27569912225	445.483176358517	886.437205145892	992.538077534706	336	898.752138959667	261	206.601540617459	255.106010730456	604.003208742595	270.893500829151	1177.4978195272	739.009898131761	1037.81347156173	527	809.701830002485	894.850421724225	1102.14672761819	687.356015976282	400.865717794167	568.769652152133	1566.87546432877	1615.29718909638	1108.15092529171	1106.60858385411	1570.82517347675	396.953834894677	1831.27622066704	1246.03581010693	620.542738296751	1359.6891380001	839.999775613893	1678.81121913569	1531.78803863951	778.982520420794	1905.03023957932	1263.30950101753	241.901468482993	792.030889735639	1484.54727853678	413	667	241	863.960848943895
ENSG00000031081.11	219.681150165676	238.986643195437	179.110005929952	277.614306779791	323.488572765911	369.577826124602	156.559566131756	303.832527763047	258.844666858514	165.927460790209	327.36720887518	89.091231789739	154.877692750978	59.3122549235837	249.576857432465	107.809946892132	252.37708788305	229.279705134527	360.820126541684	172.535337624598	203.832092462262	487.922515979855	425.432446439925	412.905011039067	120.814001550537	169.811131889152	316.802944856136	473.695413278632	321.373445220133	313.902400236434	695.827638665267	191.781827572997	605.607280923495	341.611462895058	121.593415916554	396.439543131234	258.09951983318	360.101130282578	309.765952486676	453.329871901594	421.341877039653	436.985310726996	133.576783201609	328.071334071711	544.390097557629	204.120283927041	203.310068196402	216	178.532709181978
ENSG00000031691.7	26	7	24	21	24	34	9	25	42	6	13	10	6	0	16	13	56	20	40	5	23	47	47	11	3	43	43	100	52	40	20	7	85	54	37	28	38	104	116	8	56	54	13	21	42	5	51	13	25
ENSG00000031698.13	1950	1025	1292	1659	1872	2300	1414	1641	2376	931	1969	826	1511	767	1977	1064	1861	1497	1708	1411	1454	2057	2276	2146	1067	1197	3247	3072	2128	1801	3330	1483	3551	2309	1646	2847	2090	3256	2631	3245	2904	2998	929	2011	3567	1750	1115	1740	1537
ENSG00000031823.14	1317.73749698217	944	1157.24556248195	1353.79062713048	1490.78641346731	1861.16274786892	1130	1288.61668849627	1906	742.009266972125	1559.13840502871	566	1019.77062138839	623	1599.83692660918	608	1477.18279862529	1015.0618417485	1279.38427094435	1032.61524525218	983.637031808698	1440.90228616135	1559.36025759852	1559.53512156034	831	910	2283.53901941935	2176.53743600598	1438.53084229102	1502.29643542305	2433.3862310021	994.092306378101	2596.61833349224	1397.64072951468	1249	2028.95001283279	1323.28488344578	2395.67107302661	1894.21375200331	1915.35430304533	2659.13865363132	2172.922622003	490.90915106358	1593	2519.83738731306	1080.24111203305	698.359311194672	909	1146.01323376623
ENSG00000032219.19	1583	810	1261	1466	1641	2205	910	1482	2205	598	1862	410	737	755	1220	598	2221	1357	1680	936	1661	1665	1390	1155	694	1259	2809	2865	2205	1726	2492	826	2966	1591	1293	2234	1276	3166	2311	1396	3227	2107	416	1392	2309	1034	1052	906	934
ENSG00000032389.12	233	146	190	217	341	346	222	241	304	107	237	154	189	106	333	144	306	221	291	146	203	328	318	314	147	158	422	480	330	307	506	185	686	433	224	460	286	422	392	488	431	433	164	322	527	235	124	224	260
ENSG00000032444.16	3269	1232	2088	2205	2813	3046	1888	2057	3084	1351	3248	1028	2134	1130	3003	1394	2611	1815	2188	1955	2005	2618	2400	2737	1330	1682	4040	4009	2836	2713	3889	1879	4079	2545	2493	3620	2290	4965	2706	3708	3878	4164	1133	3261	3886	2092	1269	1510	1865
ENSG00000032742.17	128.862614437496	45.2563388192861	66.050110632034	72.1956167619621	146.145855864279	150.974798909278	53.4620427679421	96.6626044835923	135.38388178513	39.3258563776707	123.387477505211	40.2039508680112	69.8583644253274	29.1314782729104	86.304613196694	37.0932534614314	166.273909869615	108.553182807986	92.1035153388788	51.269336341363	75.6795305221068	148.88070079251	137.229991642428	115.129235745316	69.0708875220497	83.264226511333	217.877036757869	204.861136490204	153.604494505917	91.0743184483801	201.301203342093	52.1324750643146	255.872061117077	111.129325280442	59.6377786862873	175.291713293798	88.216306002783	212.755298918169	237.59930395318	110.760893544929	255.812369112311	162.376359461296	48.7240472840202	72.485128585297	164.257909277562	80	78.2050329822813	76	95.6026526999085
ENSG00000033011.12	219.474214240954	132.002657159301	178.88096534791	248.012569304075	257.140504147319	445.398250843452	202.105879157313	295.346909362868	349.584503364195	127.241901153116	268.887492471012	139.106825735871	258.762642227211	73.7004979931317	380.651766729899	141.477772501522	284.663451422561	229.117887534974	308.33015647394	188.127018125756	196.392748379327	340.727482383497	324.479867998896	320.345863029117	154.310689429418	226.973433833092	469.775792496181	515.943653833543	347.165523749905	317.046619655014	532.912467556578	231.380665572861	558.214162380609	432.037767849541	255.265587990258	430.202516194587	284.363474526905	533.237736969946	498.416264610853	486.607367293041	535.724615678471	544.008102145175	184.022518683011	302.161629192318	593.210148182492	254.662278292621	168.292106536127	230.046925776125	326.538330708214
ENSG00000033030.14	564.24898054011	333.397078378314	516.866231410455	619.747411732005	658.173654781848	815.178072692239	377.713814160276	556.522805378339	762.788393651084	243.236671345417	640.910578922156	244.64089506843	312.060395765317	244.406629547591	551.271313285789	242.1349833869	729.733773453494	504.047212249467	777.176373850033	414.506143472393	457.88118871709	629.586331356152	719.427394876613	614.004051141987	316.284853088462	410.32775309157	1123.50544345315	1160.78781683907	782.879372311242	723.704534120022	1091.08241421147	315.51741969173	1207.6413590097	801.006863187052	519.845537917705	980.632563441074	624.221949056474	1090.83317420855	1060.99016043078	724.470633653966	1465.35676977851	1048.35803713678	254.909349690647	627.206356987527	1056.36566282881	341.562248597736	549.931664011944	331.906430527412	468.337004824522
ENSG00000033050.9	328.449322013737	292.230247619804	316.609593854217	352.933006688633	444.141465104428	564.617467206859	319.821790530717	441.385485425636	485.392334304586	242.997661512424	380.619646581115	235.368762443431	240.583515615726	138.426256805156	515.36185960796	223.349667023787	498.436602955652	309.694673985967	502.781751562337	295.628749023033	281.66805191544	471.454299391333	507.05576218833	595.452772841118	265.948905907127	236.159816572784	748.746263658414	714.640157010616	580.816156355764	487.254471693975	979.273167785939	375.669182072923	827.009096925874	479.223173996724	451.010418584279	728.415972300961	381.646561917487	676.244738251218	769.049086987384	599.969999586586	903.348698543984	697.738207353375	173.293428235	454.013500975061	849.04974301985	353.897213017777	404.091389979778	364.185746920277	446.28525432297
ENSG00000033100.16	1490	831	1206	1559	1941	1960	1312	1443	2127	857	2323	528	1151	791	1772	592	1798	1117	1437	1073	1220	1474	1715	1575	882	1226	2701	2541	1598	1648	2732	1107	2471	1378	1327	2097	1293	2939	1970	2505	2311	2253	489	1649	2206	1239	980	975	1123
ENSG00000033122.20	6	16	21	17	9	34	15	5	6	1	8	4	7	8	17	2	15	4	8	6	8	9	13	7	10	2	12	37	29	1	35	8	18	11	28	32	15	11	35	7	64	25	5	5	17	2	17	11	2
ENSG00000033170.16	161.973720641272	66.9758214734718	190.199840374477	211.951731387028	208.624064289602	252.022614540446	139.329922162378	226.93404730325	230.834742648353	67.7406197094014	114.728314190093	73.30703112822	94.0768716261456	42	178.863159653279	73	322.665524552529	221.636457735392	214.775263878437	118.637745428159	132.631129868895	308.426145216391	269.614567342666	245.599175202894	106.39632893982	141.503334756363	286.795915080096	412.421828403877	270.534651667506	215.807127465646	416.635172587538	126.803164417774	432.674308660299	399.336540497788	152.499274031233	373.750990631461	212.584325749327	304.191644690527	442.238936261287	189.91636282755	524.116745755627	467.182168533006	154.793647668237	284.991189865927	575.746018925048	77	225.134278033802	117	285.200817262366
ENSG00000033178.13	469.039698414342	230.943677461541	459.787498310122	514.244619428068	629	902.619263004672	255.347165001353	779.845087282884	775.661345101153	159.946317724136	543.700095137554	229.956963349938	97.4533678130614	118.256330523837	438.000906348433	160.034364121485	954.623535213054	535.018811901733	927.979279440328	325	532.010542577625	618.166687406701	733.830341344911	534.065097179408	258.525599031558	461.094303386599	1078.21135177543	1259.21186502909	919.41685583354	651.857735283804	1052.5187640648	234.275451564133	1216.06229269452	948.929443927511	490.970399453478	1032.60956150507	546.280961815801	1166.00168720289	1456.15006095336	408.759322319804	1274.78426365422	998.39240108706	184.951889817027	489.994829102408	966.719758361082	238	520	186	393.100133431613
ENSG00000033327.13	4518.89648734632	2801	4087.98893766904	5229.95646719936	4901.89875820968	7780.84779202987	3320.84928716584	3757.75659033096	6530.89946678016	2071.97501486993	7407.93946357725	766.965577825666	2297	3637.97397418122	3597.97803192095	1476	5078.92873364738	2875.97897537171	3437.91641166144	3222.94762435013	5355.98539339525	3382.98330253645	4114.92098410037	2727.92453243668	2472.98460799322	1887.96875677745	6588.92111427795	6178.8676591469	3404	4829.98985380541	6201.87797906227	2855.98695440415	5768.91246732979	1580.96716120752	3030	5217.95007911818	2600.73703666943	7454.87214107052	2878.71918743521	3653	7854.97167591562	5737.84303076256	689.925280509295	3707	5646.93629852495	3050	1861	1807	2018
ENSG00000033627.16	1357.58339581156	805.511263310692	905.68377737906	1284.90957818947	1647.42902891562	2124.51614494805	1080.45665641725	1000.42368529336	1733.22574736728	783.939727900029	2345.27351126303	347.565481804884	1223.92332271502	775.264682472378	1615.14798631524	463.951649473601	1818.55100052608	626.166612218758	1296.8401539568	992.369409597996	1098.24707544092	1338.21509449982	1234.41874517105	1303.2921961044	845.453744487511	964.301367256349	2025.91238612162	1761.36850642218	1428.96963293559	1364.84022881599	2160.64832335351	942.922963172567	2119.11935345401	802.501272837618	896.938026361132	1705.04409559012	773.560500592356	2448.39104456171	1552.26076129082	2167.83383289673	2274.13534168093	1867.75788129801	392.554067626677	1349.64665193499	2084.88034731271	1291.7601467653	657.116348555248	651.627977801742	747.447576491445
ENSG00000033800.13	2069.8935153243	1331.95139135504	2084.90054740272	2164.10719012902	2403.36252500621	3744.39652564978	1576.9921381962	1990.67419553228	3420.3358226534	1040.38879767597	3103.6200507805	515.699026235506	1043.5327165384	1075.79761340398	1656.56056593744	755.315448408308	3280.61481228297	1695.61764224643	2392.37184069771	1555.73931539457	2488.91146378329	2220.45539096552	2489.4472050525	1898.3039560192	1182.44518394268	1498.52036588158	3982.06711143992	3446.95357964772	2262.23149596499	2633.93183644538	3450.84526937363	1173.46306226332	3490.27409685823	1778.44771904564	1973.26248822114	2914.40217858398	1745.70153963162	3920.81579059163	2622.448541458	1696.15794002576	4169.96423932432	3082.80419110539	556.599344132146	1727.36229322474	2983.70652099185	1161.77578667673	1542.67977441517	1050.56165127648	1205.79107394492
ENSG00000033867.16	239	145	178	314	401	562	133	457	356	113	227	178	52	43	353	117	561	418	687	268	292	276	457	313	147	231	573	990	564	463	727	126	1100	906	252	739	488	578	1235	204	988	534	150	350	665	116	429	102	385
ENSG00000034053.14	724.780545394712	465.733048937355	656.132790036522	691.575058951415	579.23172534855	1238.07145168261	594.469899859551	626.612066909838	963.963104726338	341.103610702957	529.586220352915	300.381250706944	293.333560253529	223.286258599807	808.539363045486	267.046204871126	615.451748043204	406.186623887748	623.330066324134	513.821467738804	318.66811901679	310.030550466008	749.297076142717	583.994993297008	432.664490361663	258.21076525072	1361.92198272368	1338.07896861369	837.305988164389	789.44282820922	1359.6465217152	549.104369522032	1208.17018006695	939.665850638575	923.938370991512	1032.93287501202	738.744627695639	937.823372354648	1153.84708125571	609.47953688302	1823.05216881259	1201.9326907355	327.780998994143	761.922685095388	1233.01430207504	614	602.184406363917	492.855305985463	573.060840447911
ENSG00000034152.19	4529	3192	4360	4495	7619	5840.96104117904	4589	4200.97475566058	7042	5114	7026.97094855276	2067	5309	3297	5006	5766	4173	3767	4070	6184	5666	4402	4260	5486	3370	3870	6634.9754689575	6318	4208	4774	7132	5501	5179	3062	4519.95052674862	5720	6996	7900	3934	6117	5759	5753	3054	4446	6008	4220	2273	3082	2469
ENSG00000034239.11	5	2	2	4	13	6	1	17	5	5	5	0	4	23	6	3	11	3	1	1	11	8	9	6	1	2	17	6	4	18	12	7	12	6	0	10	6	6	10	6	10	31	2	5	9	4	4	0	15
ENSG00000034510.6	11010	4499	6345	5939	12586	7782	8726	6807	11188	4089	6665	4426	9551	2558	13808	5365	10847	6657	10079	4706	5133	11819	7856	8339	5898	7173	13453	14671	13700	8007	15731	6151	14583	15892	10018	13838	11689	21148	25415	16032	13063	15439	8020	9419	14781	7787	6967	9376	7804
ENSG00000034533.11	227.468105480435	134.680425232329	183.15316861353	220.521342036168	259.759369709374	342.64977345991	175.715969189948	208.495455511629	308.319021608637	94.9097948079634	215.118782282948	97.5162927462283	128.183342635216	97.5783157205627	201.964861787002	140.210694072652	318.998521008561	219.982625457069	244.267477261793	150.087257950665	200.748917819354	269.85989589354	339.625573600734	225.303728330605	126.342879083928	158.506580535546	439.414752246154	561.7426950738	337.384622300189	260.485109938281	379.167343604505	143.647679277768	484.68015151651	365.163207341277	242.322345145086	465.671808260286	278.761225617221	433.332372464862	431.730255949476	291.29606818954	473.312517414089	394.704016191743	114.478927544168	241.43169827679	416.334468866853	132.024366069276	156.119462879201	141.740686624036	217.18661516324
ENSG00000034677.13	734.663683638437	516	731.946024459926	873.492884759776	907.316288997648	1434	475	948	1167.29835002903	334	925	309.963476433525	238.453030172578	314.400090085099	621.379702993789	286.007950983475	1338.13926976984	888.305232859133	1247	646	1082	1005.3451768135	1021	741.656240928207	366	758.449037826028	1558	1990	1191	1233.11052205934	1538	378	2122.30536104727	1395.80423635386	701.088154812964	1584	878.501816877521	1773	1924.21733348275	613.05979453841	2097.39839390428	1309.17123987662	289.491053460691	920.443822134471	1346.33383120223	444.086320484661	814	399	780
ENSG00000034693.15	77.8416513693379	47	86.900057739634	103.804050668779	103.136114747032	119.509978312859	42	96.6468646514761	112.466271668102	36	63.3045901543414	62	42.5939121839489	7	102.37774110332	35	126.042744903914	97.3323062873948	125.854511487022	51.6251663764828	85.711285917609	114.832731558037	137.940791690684	106.805622660106	54.1876038072638	75.8223322150378	147.133061962966	206.287209602154	131	100.426232078812	160	52.557221111447	222.82815409207	197.084655995356	127	188.457764411569	99.7288013421915	159.056724038997	294.215363252755	119.535370603338	250.790597345718	168.39734130343	35	100.74590589613	227.584271694255	47.6132783588255	99	29.1375804760829	74
ENSG00000034713.8	2152.90902746795	836.603134072901	1500.2254375126	1663	2468.57696071575	2212.68197820591	1636.96042700943	1204.14382609966	2900.19369923778	920.031334687606	2534.23924012974	658.049622041442	1173.50777168096	1445.37056533081	1789.2135417541	2353.99316836609	2556.25796663002	1595.78305480513	2112.64078219044	1481.7950619563	2027.61830207005	1684.21669665775	1740.59435985273	1338.05912971537	1191.09672343105	1870.53591187571	3272.19225249004	2727.04974264203	1835.10705850302	2032.01330571825	2572.02907739678	1150.49310377942	2457.57655096062	1975.97317317364	2007.52282473312	2607.148981632	2385.1647204977	3656.06796093271	2634.56461137139	1845.11706394921	3158.30226890273	2308.90685146559	638.363784467841	1313.83742182255	2204.8041126805	1199.62683039142	1083.67868935144	993.021355807056	1116.1188504799
ENSG00000034971.17	0	0	0	0	0	0	0	0	0	0	0	0	0	2	0	0	0	0	0	0	0	0	1	2	0	1	0	0	0	0	0	1	0	0	0	0	0	0	0	0	0	6	4	0	0	2	0	0	2
ENSG00000035115.22	626.080039981009	212.56487915031	276.740203380581	364.569537475742	246.084274246551	706.932583835819	285.500135066158	389.952363956421	585.540095972533	139.615567267159	280.941783027815	173	94.4466007601859	122.850020941378	535.624294961541	127.55978660238	535.283134704482	335.829624536067	530.038376595717	192.659976564937	261.83192727735	410.168183514999	599.259591846242	321.569177862026	261.297404617791	263.510210981353	444.704111323249	759.287828313182	702.645103094723	502.437514270248	686.279393382795	107.93210670689	889.189582798526	622.599416797113	364	864.950366519252	401.326558593354	614.498343624856	852.9515166734	305.123276689267	1200.89629872742	891.300719771522	159.818602459955	442.001639432387	890.505369428853	221.848530017501	520.855964840398	225	473.43568482927
ENSG00000035141.8	315	139	202	227.95879491544	331.244656349876	340.078027708075	151	275.008735322197	383.102788318702	97	189	125.604978122142	109	60.0043703065993	288.178909601323	98.0167775649277	428.014178491918	229	346	156.046981941776	203.043718333698	400.936902518028	345.00661687634	247.003596690841	119	249	484.652935329306	531.983910414879	518.2485005435	317	452.062907668959	146.001225255512	596.044112840652	563.048740209519	338	454.115540764602	349.026261711188	584.921421173361	835.124141008873	279.053012276737	613.050784384229	446.399332961881	116.028398202148	321	516.004705209693	222	201.085474801042	136	292.028905487112
ENSG00000035403.17	2447.0396766053	2053.12020265115	2363.80679348644	3295.27879290918	2914.46773840069	3305.3995758195	2179.25309464042	3230.63688774587	3134.23049169616	2149.60826581929	3751.58642907048	1087.9009135734	1598.99094989651	1979.98642103036	1970.99076605445	1431.08605104567	2449.11375382923	1895.33778498829	3131.78288386848	2784.00299263748	2673.04427182914	2816.1162195422	3113.44304187355	4195.38680641157	1561.30702031068	1586.94650565902	4077.33113168617	3757.91501474572	4412.7251670701	3086.3256601892	5758.36132844255	2391.90418870088	4627.28205579918	2912.07796565374	2084.99997276922	3811.13128650222	3210.68325748118	4043.12945205322	2843.11059846014	3389.72375096991	3777.28749301438	3935.06473803568	990.864088142606	3586.07122675141	4801.51813289649	2550.84649171331	1430.19800886951	1391.76178355454	2528.80355849165
ENSG00000035499.13	9.75328968365863	5	15	14	12.0618608615984	7	23	12	7.21817268050799	2.63168639992736	4	6.24776606274846	6.74835408520275	4.41766568619509	8	2.33525566071176	10.5856205852174	5	16.4680782911576	6.00683052462035	11.6556159906656	16.3536280279506	21.7065741174459	1	5.78937013045533	1	23.6319774405192	28.6881828920022	13	13	17.6820600866612	8.65707816937032	26.2729208684413	36.106615847506	10.1247033466245	22.9829778760917	5.33049936640133	21.9883431816579	25	6	35.5099972144972	78.344019493382	0	18.5376410588097	6	0	5.29013662682478	2	17
ENSG00000035664.11	1772.64644674152	1048.71628019088	1252.365365988	1649.11094186328	1882.99813810788	2024.64229054973	1652.42981295618	1215.07356626915	2908.03139604339	828.783954996839	2220.2822048528	278.94338379768	1057.46596483108	2213.98387681805	1281.67147896672	750.073793095319	2219.21604746841	859.127128622122	1047.90844763715	811.625270501616	1801.79143295706	1419.48197815451	1312.80175786513	657.3371544945	929.211043312744	1025.03933494141	2987.8459382155	1775.92602052303	1570.60804374715	2416.02053348862	1929.42436415816	1168.62257537609	1784.08929063374	546.248113205691	1186.04481254976	2143.24296301698	1141.55836754117	3007.73436901642	1421.14341603541	1279.45830419226	2720.35000757389	1996.04271581288	304.015821285604	1706.35307637927	1599.67606605009	1333.55802114232	678.770486334561	683.455906890065	718.600635888723
ENSG00000035681.9	1050	447	741	1044	1013	1358	559	847	1198	354	1183	272	412	306	870	335	1377	689	1124	566	937	895	1160	850	483	596	1729	1615	1054	913	1604	484	1791	1342	763	1400	865	2016	1547	869	1875	1328	318	759	1671	554	619	567	826
ENSG00000035687.10	947.831508703769	649	810.890742117656	1190.86089921296	1461.63370983482	1529.81169720764	717.713731953939	1139.64258289081	1701.85889624821	566	1106	377.888907507781	477.862700592101	415.965711439668	887.819863483161	475	1592.91405142563	1047.96832102392	1595.81780817411	838.673653808523	1004.81832737117	1093.91674986424	1345.90519925877	970.770840775846	542	814.836152596942	2228.1881563382	2213.76709699282	1371.74006283508	1364.80093252099	2322.67936383198	728	2253.55468688857	1739.77749395372	1054.93793512507	1875.65213672029	1138.96290117423	1985.53402444497	1784.0361646495	1124.9679181412	1959.67056980116	1602.88012613355	360.955386287061	1103	1802.82971807687	757	788.94544724913	542	1045
ENSG00000035720.8	128	28	49	86	70	126	93	108	68	22	47	33	27	17	77	22	267	105	121	47	61	299	106	119	70	54	226	98	377	111	188	52	364	139	60	151	93	166	305	109	232	143	33	120	349	101	224	102	140
ENSG00000035862.12	4861.0141191083	2717.24766036539	3777.02433810588	4808.05866392142	4519.64055330737	6941.68059816372	3802.43843340353	3530.69849540605	5692.23841417863	2413.70895604706	8719.3984892678	854.551800500579	3821.9365870313	3424.80557620362	4568.00350847202	1633.5329774358	5333.71555514824	3093.61695999901	4438.51254766928	3126.91360213179	4199.59274592294	4152.21476653605	4313.71238036841	3717.480220486	2123.19739179978	2917.1543031185	7751.25805135648	7486.54584954602	4033.71145702344	4633.51063114095	8227.31557677981	3394.14971759238	6280.54859725253	2197.99007492512	3139.49649670549	5999.15307460832	2655.41895976406	8118.52741445608	2592.22020572179	5758.89647571589	6326.08925647682	5469.62690990485	980.247642920417	3590.82216071004	5016.07905124318	4414.96658203959	1881.90848169791	2814.38555409493	2104.25341095894
ENSG00000035928.16	577.94777310263	428.304869631922	552.398274725095	727.31850660364	633.167651358365	938.923148136294	356.941340065083	713.428710483764	786.376947327942	311.332914951178	602.112189191274	276.050265628957	230.313349410716	179.917003342183	593.7786972003	334.554040218477	757.63697291311	572.729428159785	761.569027489824	419.592713743247	531.053541303723	948.393074939475	928.80957291707	889.847490966485	336.159464116849	432.02897127462	1159.10620900277	1296.69005011483	899.65912832502	689.028143587656	1406.56914640104	413.480271537986	1442.3424972733	1127.91262071017	597.691681934007	1205.34372766695	716.053358268207	1093.85390921601	1059.60147425857	888.017388588871	1686.24137088278	1178.20900551405	269.926919070984	721.299010053399	1524.80425055564	414	568	339	649.125723522599
ENSG00000036054.13	647	289	491	528	766	932	333	622	943	219	785	207	166	230	456	197	1004	554	929	356	596	642	684	433	274	554	1176	1315	920	772	948	241	1195	775	602	990	573	1425	1257	350	1266	918	150	519	733	286	482	157	414
ENSG00000036257.13	1539.15319758895	895.134228860701	1453.11816552234	1724	1711	2170.82492967288	1008	1436	2038.62199814152	746	2337	425.530890084487	753.853391540433	916.567605733903	1091.73164007552	670	2140.92380076599	1515	1791.84835118408	1124	1755	1795.68134260453	1858	1470.16669450776	890.137395121021	632	2914.45848358604	2701.28334639888	1863.61459970732	1811.99999862828	2692	907	2904	1613.28292974427	1376	2380.68017898874	1460.44453200808	3183.72829224289	2071.32267175656	1601.76950117393	3419.30478514172	2278.55452576047	426.466486228412	1296.27374543491	2674.8115678017	1097	1109.19074878032	806	1205.63586363914
ENSG00000036448.10	51	103	313	211	133	599	442	269	939	1010	37	103	28	74	26	11	211	387	228	221	10	42	127	25	16	48	196	79	100	341	39	510	145	446	350	47	28	71	220	76	705	886	1231	277	512	158	192	50	336
ENSG00000036473.8	0	1	0	0	0	0	0	0	0	0	1	0	0	1	0	0	0	0	0	0	0	0	1	0	0	0	0	0	0	0	0	0	1	0	0	0	0	0	0	0	0	3	0	0	0	0	0	0	0
ENSG00000036530.9	46.4443180823054	61.7545823419279	25.3484397478249	30.1879828186473	66.0331233201609	60.1052247916714	30.763337680047	39.396735274657	62.2051252485501	10.3191483105296	41.6092977509303	11.9139777317089	44.0502063231726	95.5847913716565	49.0163595655843	17.8579518414749	58.7498201846312	35.189562244118	48.4719178921464	28.0490960327592	50.191613962024	37.5255498371921	110.63703809818	31.1626105638054	23.1304148635465	47.5616182425312	84.9329413134368	83.9100968459775	63.0092463893757	35.5266681022055	72.3879857837979	78.9798976548513	74.2875776199871	18.3057120173914	28.7086752466041	72.348400434782	27.0620508190295	66.6336597683654	56.1744794824661	41.5487109361503	89.5713638554944	316.114657743965	87.6184574220878	24.9140757008226	56.1001784553619	39.9395051476843	37.6201688279248	24.3586944013455	55.4263595398893
ENSG00000036549.13	313.133285379063	151.056428693727	239.139567019473	293.059687144018	299.946228717894	515.120428000125	117.543565248546	399.081589976006	402.937076664744	118.015686717598	252.946749659322	110	76.4046004561066	55.8746874405106	294.707136142851	102.145156681098	482.80287363888	307.979576839889	463.653361359007	190.625054421623	309.035044636737	345.885255692306	449.42635619013	310.933261819056	121.343543424612	203.465776232338	595.04087874765	829.954579605967	553.053043928498	356.114750482022	603.125124638368	110.769638750889	805.131458061539	557.267874525584	324.357046418222	609.314842565454	399.050000234628	582.13120248457	832.60447423682	226.807888039947	811.919371715249	629.116503849335	152.881444860982	273.192933680936	557.927811741536	140.022368187477	342.149675606974	131.194929560285	341
ENSG00000036565.15	1	5	8.03684092956522	11	2	23.0321869620954	5	5	6	4	2	2	0	10.0741869691427	5.03572913397777	7	10.0331882200733	7.15403856310623	5.07195373756044	1	2	35.1885058544151	9.32033692077903	7.06235018503671	4.01215163441257	4	16.2084520779597	6	4	12.0051946943798	10.1052337661256	5.18313611017762	15.561408318403	9.39412964740423	5	4.11288186967421	5	11.0849254449955	20.0125780894142	22.031671951396	22.7382853935105	20	6	16.0075902478103	16.102261071789	5	0	0	3.53722404785478
ENSG00000036672.16	4	6	0	5	3	4	4	1	1	0	1	0	1	2	4	2	0	0	1	4	2	2	6	3	1	1	7	5	1	0	1	2	1	2	0	2	1	2	0	0	1	12	2	1	7	0	0	9	0
ENSG00000036828.16	9.26852084731304	38.809698748283	4.78666630894184	11.3063823473654	14.4718557161938	26.2668512291572	20.5986242536988	19.471123985142	24.4491258379628	6.32464934097079	11.8079731559108	6.02290951663779	59.7371705610805	92.5168681154411	15.3055513177109	12.4470262837942	9.23640955089683	12.3015730998456	20.2385908411801	11.3782584361104	27.8991155379278	15.5810698987055	57.5347991929359	19.2943674649025	24.5736168902103	1.2806338953353	18.1331829339985	13.8595335124009	40.3552015621013	4.88431714779891	37.4750839152803	48.1031198277437	22.8107267356272	17.3346617091883	9.41388443215869	51.2412646204045	19.3301567034783	25.9002371963662	29.2574950468721	39.1926359098134	32.6646907026929	328.735623060167	71.3928811694231	13.9023999836735	17.6215774409547	16.4833133705749	11.8928679467824	6.00963117708626	3.54287809016142
ENSG00000037042.9	123.061173186878	49.5676544583086	86.3288866860236	66.0372984422672	133.07885613371	126.934476190385	70.2420750967934	110.287380376079	107.739380840653	41.2790864044786	66.1744800199097	60.2597012744476	67.0080673540494	19.4370183849002	145.048479757708	45.4399283701589	111.202983997484	66.3431001887382	75.8218177007614	52.7292611021643	52.6822484340896	118.680064577641	100.254698847763	162.032161548871	69.5814443461397	63.9561125669304	177.070332843403	147.70600181412	137.136403796645	105.78809069883	140.789815761017	67.3539513816478	184.434230369071	134.724893373304	52.2145718714015	173.180838971947	129.832576831571	166.068041392816	262.974700604416	147.282418162929	217.043547300229	116.343805927652	26.1161411271208	117.576313357931	225.737068180525	59.2736327812284	69.6810696394199	46.5899559484661	68.8577839327817
ENSG00000037241.7	21.7563231900982	20.9679646760815	18.8012287892938	14.5995521315482	33.031691818534	9.23260357560655	13.1155049973567	15.831289862155	56.3406634521763	7.4912945807559	23.6735353762279	11.2425109228047	16.5454618017513	10.8555000901149	15.8928070182329	17.7973339386552	76.952683961632	20.3097620929241	60.7614904530062	1	18.8568706913402	65.7568592920956	38.4616769239618	10.4127317438479	12.4532069650298	39.014310821216	49.612753770355	55.3103442123725	98.5493144606689	16.8299855281297	21.9935067518862	7.86777391886966	37.146333871266	104	25.7930225823549	19.6548037698	61.377748563429	161.183756954697	235.72086505891	23.0765821849515	30.887005746894	61.888854326323	24.8203601680587	25.0717938194068	22.4640881745316	9.97294144529625	32	26	36.9778764783443
ENSG00000037280.16	51.0614782396283	49.295147113817	64.1129019618971	84	92.2611086798626	110.515704258431	50.2717964442996	121.416013213747	97.0602289386092	28	57.201170518561	18	19	52.0721027866487	148.068125916713	8.02224767970556	114.121616038695	116.271115648956	119	57.1695786079729	29.2077796562288	45	141	96	43	46	62.2034978391795	274.09006611193	59.2042489654367	99.5282947555983	95.0932251294857	23	272.017402172595	85.1307802152298	61.4199145166211	171.461109810579	41.0927968881658	93	175.732384689891	52.1602791769654	170.238571523946	162.127722613056	21	96.6126096525479	171	36	67	35	131
ENSG00000037474.15	838	536.015611765433	675	1017.17875576104	1217.0936541568	1684.07644653481	714	1197.01360388458	1277.14689204648	454.046675962169	979.376681409971	372	417.922414693869	321.267244377612	900.030187636717	413.025530891779	997.249546243003	1054	1034.10834226154	637	706.003723818896	1227.08655681498	1264.03297607261	1280.01676165822	597.021944167236	638.125728845944	1679.43839682025	1889.04201363917	1442.06015164438	1182	2038.09967191039	571.254872549479	2574.04973692965	1326.26012003531	803.131641334897	1748.01784495738	1184.0389282184	1623.7378113715	2048.04667269388	1232.32652109599	2605.27085374627	1717.49352050539	342.529366604422	1155	2181.96022048981	807.016686430127	884.029126823289	631	983
ENSG00000037637.11	531.105720842008	395.373432204361	469.587172788183	676.590809813705	611.028412897066	926.272786974738	460.00499158954	587.669375121423	855.368078945089	344.426708910869	791.061711043413	211.037304145557	450.75967973455	248.273586061583	561.050801827303	241.026464569911	649.527920991042	485.089167477093	582.036156236651	457.056493461366	482.291137668546	662.021390796685	698.29217319725	770.036878958912	368.621759084899	374.096461002225	952.920106808659	1012.63099839379	659.092098667709	740.07552771545	1183.23193369504	425.556289330799	1180.15189948228	572.005160753649	549.134750719121	865.122766414338	536.059658149382	1189.08421044084	901.157482956463	887.101547410955	1156.17842033622	952.632763135214	183.41791165191	578.520483997593	1233.61118848211	471.005103156173	433.000224957874	343.006464672146	536.033827549979
ENSG00000037749.12	168.177182803388	87.0401087652138	154	194.795673187177	232.212634607445	366.775115441417	116.893814732652	245.176439610576	256.646389292881	100.27439400729	216.298338926455	63.0350348721381	35.2613400602444	53.8782565983679	127.943666275149	51.1769507036985	213.473106552452	181.708204889403	260.243227105019	123.583517249004	183.309584199293	166.161671581876	234.571231053788	154.120655664937	86.9003216222715	149.051604861026	342.989721965894	485.284680425384	216.289692300451	260.382869828276	341.331932903581	89.121774648073	405.825203218746	230.066741682164	120.006911050074	361.236222823323	175.576833768455	305.171375325749	279.46184681005	151.394431066057	525.045207030202	345.568628953642	45.0797510560036	169	300.604765482968	79.0380131856991	172	95.0041047789788	126
ENSG00000037757.14	469.153796135287	266.179571254524	393.541851880534	414.336280648802	531.506507583625	672.661743271944	179.309940392101	489.182081459184	683.010486407592	183.684904856339	425.02633684039	193.631213769642	230.511106401164	62.2345926418238	561.544135586204	176.396473928274	534.882184596319	400.583509515241	467.003994189046	334.869965235018	346.868547647594	456.575159508224	588.096099935986	563.810246595868	223.327672636237	316.414219672761	906.082045133346	802.242927943193	587.120438635969	621.897899502341	850.621450536286	232.441809648603	1080.47355939277	677.103683820317	434.572446972765	818.302895076232	501.817481928238	736.355718307125	975.13475067297	421.504680813622	1025.87842373418	840.748116836114	147.964833254807	706.197473988509	898.955553699092	277.316266288638	196.875891576978	192.706663688072	350.156512267103
ENSG00000037897.17	51	50	58	26	43	61	49	37	49	25	37	10	23	18	68	26	51	44	36	22	31	59	71	41	23	43	96	72	55	44	83	36	75	57	68	101	59	45	82	86	99	87.8489599616296	35	67	112.435604903873	73	33	67	20
ENSG00000037965.6	1	4	1	0	0	1	0	0	0	0	0	0	4	7	0	0	0	1.00018198356416	0	0	1	0	9	0	1	0	0	1	2.00031445610036	0	0	4	0	0	0	0	0	0	0	5	0	38	8	0	1	4.00079004299853	0	0	0
ENSG00000038002.9	282	83	147	122	310	242	100	231	280	98	211	102	136	53	291	119	205	152	306	189	194	308	307	195	146	193	332	399	230	360	474	83	476	416	218	579	238	457	602	287	437	345	103	270	334	187	142	139	176
ENSG00000038210.14	185	71	131	169	230	395	94	465	233	84	158	70	45	31	169	52	275	209	401	132	182	227	272	157	68	164	383	527	330	258	416	79	580	470	170	354	209	350	657	134	464	328	92	177	404	68	309	60	174
ENSG00000038219.13	4671.62256719008	3323.11074699395	4408.61297833652	5650.65741907894	5767.86056212632	8307.49651106397	2819.64804849216	4677.67195299067	7477.41036916852	2587.44123119952	7406.47160856756	996.06828743725	2607.40575044011	2782.72569195706	3447.58349933269	1787.42780749838	6165.60561269113	3842.20482364504	4196.79604663103	3729.80600350034	4778.61641657168	4478.0366882594	5894.09468633096	4059.01250330007	2532.40964046029	3788.98323317298	9270.88753671248	8075.1455536392	5487.9757999329	6298.9851908815	8327.79092776175	3007.03614920604	8464.2799846642	2875.83868302146	3784.5202827392	6345.42042902409	3471.19713138833	8457.87869704271	5145.0020976142	5865.44105641304	11758.4169130909	7574.09881777498	1181.07425480815	5035.62278378457	8119.75021736936	3687.07066566112	3510.54847507199	3339.77280409738	3545.02575234184
ENSG00000038274.17	2504.3622740579	1252.70082401163	2247.0119330062	3039.14105782404	3418.80618745746	4864.71195109927	2295.24819372191	3236.67439701061	4182.52728450945	1321.00224093112	3144.32757009124	932.00373408047	1098.84985254631	1215.05494625189	2026.40885832469	1329.14771395207	3948.87639756356	2679.16018381348	3749.05109966267	1983.07039037443	2856.08025687052	3052.02028444733	3175.27782286009	2417.27470585691	1599.2198418519	2185.66987815901	4755.41245451127	5541.90826886535	3460.83399169959	3990.37794899174	5289.1259461141	1688.21435771166	5593.31078292246	3893	2813.23909834952	4487.22848766033	2967.1744480678	5330.04461550686	4811.18172656728	3317.44804025502	5687.74801584565	4290.18624887528	1021.45231705226	2746.3663334231	4964.05346584082	1823	2347.10449831888	1428	2343.01907524874
ENSG00000038295.8	0	0	0	1	0	0	0	0	0	0	0	0	1	1	0	0	0	0	0	0	2	1	3	0	2	0	0	0	0	0	0	0	0	0	0	0	0	0	0	0	0	14	0	0	0	0	0	0	0
ENSG00000038358.15	1378.18230586373	786.635608642619	986.434930241266	1309.76963492961	1245.36362323142	1797.24574128863	950.372724340828	1299.78490541827	1799.62271515125	763.75363810646	1674.30835160252	632.943866130233	992.116942529376	463.298890754302	1476.40863267023	592.848289466853	1477.61386444404	987.914822379522	1165.20250961108	1096.87232139364	953.552732765676	1457.76449519575	1678.73905022478	1778.77999774508	852.079336372312	863.908270773643	2225.52718025269	2050.21834474306	1709.32587380434	1452.68218406103	2693.46337913259	934.532195799943	2666.04987150592	1730.74089726031	1162.86027620796	2004.84635097675	1436.84796582151	2212.76338581335	1901.89498716139	2177.02393431376	2370.34387505169	2364.18428344717	501.83200732209	1640.19558612838	2696.48260897065	1055.35988559838	1004.60003504829	975.699280100219	1022.25907458428
ENSG00000038382.20	274	199	246	432	369	568	245	559.981754904003	471	144	359	122	117	84	233	102	493	271	464	348	310	631	569.902035475118	528	158	233	665.964451148591	807.94484011307	610	625	801	265	1164.71048706461	472	201	538	334	605	516	440	843	765.344126559989	148	661	996.905387517776	249	386	259	333
ENSG00000038427.16	6125.64977669527	5320.73439045118	4031.76247137728	6334.49839902729	9258.28459276996	7086.51618649124	3526.31115955552	5226.94064452864	7016.71759918858	2087.6914912263	9858.22998872834	1719.22727567464	3172.36210261501	1375.27277927877	4204.62370986138	2545.27246857517	5612.76100058576	2233.98380754586	8696.56059333164	3206.96322955863	3872.23360928596	7779.20174447196	6948.11143278605	6176.71883578189	2494.62680377642	2717.5769116509	9553.42880178645	9803.55074261993	6288.03635490709	6340.93043094394	14060.0989082515	3341.05602086855	11446.0433429975	7778.24747001407	3204.3320849148	4771.06591335303	3654.83907497824	14527.3409720719	7988.67489846185	5609.06328269472	6794.49423692064	7335.60228104614	1111.48890666942	5685.07715103901	7612.79939649536	6500.68693070514	3691.85069622991	3154.35815821049	2000.66525383225
ENSG00000038532.16	533.246011586083	361.904150434594	463.319509261638	532.167524437118	541.894729981707	684.148868913075	403.519838691989	650.757996717286	691.039488740176	417.708953979367	682.90390621192	238.352768816309	366.483070284483	236.519229975928	578.863503544327	257.126720749327	569.109883953681	418.149080391334	507.763919212859	445.534716462208	415.513042854859	682.476905369828	695.764952988194	755.447963696015	347.189638107926	365.46514492734	901.597559816888	1037.02209594969	650.473094965704	635.661573375516	1022.3888009139	487.930912880325	1164.8425031955	567.805462809564	488.256534085666	833.622868590782	622.271363711692	1021.55924117272	738.061806042521	751.296610077672	1067.04926676974	1051.15581104792	221.986456218644	720.408081690064	1156.91545884578	469.204674245516	481.781101198845	362.161305989853	576.332689882076
ENSG00000038945.15	143.273528613738	57.4123200503144	64.2035520009421	52.5838388636943	321.943140561093	415.764812837106	87.7576946958198	135.62457907601	133.798145018377	44.026367467343	108.18247274595	54.0441796683772	52.8017286174988	52.4657261400791	90.4834019787977	42.515891307881	135.881643693967	50.0174187409435	154.987769069517	61.4889433816095	70.8330631849892	90.4855903428324	116.127904939839	49.545159903411	56.1514493138633	94.408346267489	307.188542747707	205.551645174375	158.242354081843	129.660885934309	173.26877576725	55.2441763850235	191.219768376782	272.798122608632	169.272673908215	158.928341691613	108.133495570239	139.622246353355	371.319011219971	165.868264370506	178.466855647187	145.228539897954	48.7105359514731	91.5372852054697	112.17480260782	81.2675842676025	121.508984774456	46.7341808726766	48.8623608643821
ENSG00000039068.19	18.3393108638694	28.5852326120455	13.521208339544	15.8699135103201	25.5522221236122	44.3661720551268	21.9964716001686	25.4870801502175	28.40718666402	16.5382764114439	28.0622966320319	12.0138556078128	42.4330381303889	25.9607938048997	36.6108435215073	15.5479754207365	42.4677421199676	16.7216907739877	19.1397297409974	19.7302827167881	28.2029725081958	18.6311244788307	46.3720835401363	20.2585441805777	14.0879617946593	13.1814692714257	78.0612422701078	48.7762264647641	22.9143938471248	16.0527283295146	75.2568473325236	30.8520835940202	51.0714297388453	21.0893689412017	31.3475497926687	35.1111363331488	35.5992427802967	27.5077082212578	40.0251404187747	27.6152418752522	29.3222729787719	110.982222826111	32.5237018326902	52.6503532873937	53.7622321426663	19.841907823506	13.0100333920859	40.2359932882828	3
ENSG00000039123.16	741.43204777355	365.177538583232	533.410738340397	597.270635091205	916.478755720134	928.811574291516	359.986002072999	744.176634143227	953.173902485216	267.521598427699	699.785575749165	305.953119085303	296.851552363501	204.997551750826	640.784188249869	290.063021881072	1181.20376685673	679.806021577995	1074.0263675203	423.26312722713	557.019238698028	881.322704292479	789.855192098332	714.266539868698	363.989504805793	567.13696544063	1315.35075359808	1622.55284298194	1034.42173923252	906.260105948073	1392.85351384318	411.921155025043	1691.00649294774	1501.75678029962	705.100492304167	1379.72191106868	822.282167390609	1523.58946272668	1861.52226057927	739.620951615416	1664.04169225553	1242.91833364094	262.184741089363	705.664360338405	1377.87293064177	350.365757284138	740.96954216617	279.531076598701	562.336301659824
ENSG00000039139.9	0	2	0	2	1	1	0	3	0	0	2	0	2	9	0	0	0	1	0	0	1	1	8	1	1.1414484202022	0	1	1.06599734341444	5	0	1	9	0	0	0	1	0	0	1	1	0	32	9	0	0	0	0	2	0
ENSG00000039319.17	838.370027376131	458.643316983856	845.686751395651	1006.22144701508	1261.49275509676	1765.80642650004	464.757096804209	910.896879064827	1388.69745561292	334.098245962471	1117.67983349687	202.218509161077	233.606985573066	455.727586283849	623.620377318125	226.644329151938	1736.23124299293	817.833125093695	1368.66140842296	515.458084113321	1198.09484542834	755.862726669726	980.718331365533	567.950098770814	392.117233413939	818.839050507485	1982.96699961622	1939.92293845321	1147.4323630009	1142.66476875304	1276.86178968924	349.02342936213	1596.43306503056	730.795918661964	693.90360174344	1520.98253113816	570.147464829853	1735.73731254318	1310.47815711992	428.909098561097	1920.95509752566	1408.80960547968	196.844744344062	730.41143323653	988.562221946237	327.276031341352	690.990517209669	201.785819005701	526.026114773166
ENSG00000039523.20	1525	866.960196806399	1257.9663094267	1543	1478.95450439503	2264.96524917031	1327	1317.36813369425	2348.8684861883	753	1962.9193736909	436	1173.97267474743	561.907657866111	1177	626	1553.59116225803	1132.95076819453	1335.90180823587	1256.96482119707	1106	2399.65393043244	1866	1775.95167902139	914	1303.94282324259	2304.90941782963	2076.59093214289	1741	1581.56086914188	2775.77372960462	1181	2672.81092677734	1100	1335	1585.95067924823	1359.72588335714	2288.96245953889	1623.96526148148	2505	2396.4904330846	2596.94693771652	418	1822.11802923222	2442.74440435133	1255	918	1284	1047
ENSG00000039537.13	0	2	0	0	0	0	0	0	0	0	0	0	0	0	0	0	0	0	0	0	0	0	2	0	0	0	0	0	0	0	0	0	0	2	0	0	0	0	0	0	2	6	2	0	0	0	0	0	0
ENSG00000039560.14	8	2	4	1	1	18	7.18881546494147	7	6	6	10.5775635895941	5.50380463313963	10	5	5	6	2	4	6	5	8	7	23.5133055869221	17.1709962669877	2	6	8.18489128815163	10.5964285215884	22	2	20	6.18943743943317	11.436051633671	3	7	15.0922834117925	11.5604806085353	7	17.3817135302464	10	13	18.0469041172909	8	4	7	3	8	0	6
ENSG00000039600.11	2	4	1	3	2	1	1	1	2	3	0	0	2	1	3	1	2	2	2	1	1	6	9	5	0	0	2	5	17	3	14	0	5	2	7	9	3	3	3	1	5	20	0	4	10	0	13	0	7
ENSG00000039650.12	831.735520557785	555.187480713153	593.266895673112	758.648154197259	946.859108525731	1096.86119368097	711.649558995658	644.419353677996	1195.16685658452	399.903537786082	1077.78034742272	351.017316681215	678.397259704891	469.719000217599	1197.5890722287	333.198812324535	1167.36541874307	646.649278169067	703.15026401955	685.827424729276	573.999161047298	776.364706113641	908.895377509649	903.389619509219	442.930176503404	588.278360634949	1475.44513799802	1228.04761421641	1055.72654847172	1004.5659352449	1338.05908168563	613.086543027511	1932.75921604868	965.522924960873	679.818748799669	1237.10278227482	843.432187458833	1708.97339916585	1283.78228793432	1200.50109552503	1744.86211321923	1446.07721811205	314.925290625607	1243.69773214628	1473.72183198643	685.025650398728	538.394490940577	392.205121543754	485.911091477139
ENSG00000039987.6	11	4	4	5.01303645969056	1.02380421018704	6.0130756485349	5.03319626384132	4	4.01641907732852	8.06031761803191	1.00058363534704	5	6	2.00677312596884	5.05787082479689	1	8.113739932248	0	4	2.00163716499883	3	2.02219563059114	9.03656152302823	8.05406816746402	1.00827564336397	0	13.1427808165865	6.52071180073603	8.0276503952268	2.07995352409684	7.78780230073499	6	5.09154423304572	2.80690522030172	3	2.01624630235159	7.19165205523136	9.07806577263925	16.0761461413424	3	7	9.00949414712208	2	0	10.0407321919945	0	1.00831244625615	0	0
ENSG00000040199.18	100.09625576233	69.2642740220401	120.140449090202	144.373164475773	116.773327815029	172.402774897501	107.560154904147	185.842828898756	127.122828470054	64.4522247860545	108.471509272766	55.1229097858491	67.2216069891775	53.2587076220862	123.000998067861	72.6506417401527	164.424031485297	121.513770336702	231.069054747857	135.543977453756	127.425287277638	129.662230747851	182.39399316291	151.897380033333	85.2745320122607	99.0000854632304	245.158626439568	333.127477380024	220.98196681934	172.474488976777	227.902535148649	87.7952091924503	392.142853820678	293.864663731143	116.853695000448	195.32227638449	186.88249355452	197.069052440244	290.558158102277	141.243870389855	358.658849938688	269.61599698752	64.8746321145114	209.606019685049	282.931489308919	72.5608521357195	156.311712437501	90.1635912912907	181.503049462297
ENSG00000040275.17	42	34	49	42	68	109	48	68	65	28	45	27	13	4	68	20	66	77	96	33	53	93	90	57	26	62	123	169	110	94	134	23	145	114	75	130	93	104	240	48	219	136	38	72	143	40	88	30	70
ENSG00000040341.18	332.015776607412	209	326.762450033348	394.645533205102	410.114011688924	506.043199183662	214.675737049486	365.520951463601	399.300037630557	135.019858233201	386.065233972321	79.8523063725837	113.277461258463	128.882777420472	260.886463137884	135.749853305764	443.176292940498	246.886328533598	437.411380497794	234.620696260566	325.915110061217	420.680967059361	392.751787617525	347.799485951364	163.498214571556	294.187209239174	680.29472172319	742.18756600136	452.622297060994	386.113713633361	619.439313745992	185.217878245675	727.960446444604	505.879873707906	296.232348289571	543.260248143454	329.358159286089	653.21215387859	626.513178823812	311.210757134983	677.340113904827	527.978823122615	142.013430284436	343.576695990429	564.036595904338	187.724226744244	219.960967950511	168.209490766913	292.002341984874
ENSG00000040487.13	168.455416985899	107.613421756775	125.00060680275	188.987396371892	239.611670347389	196.175003745938	130.566030590194	146.353961427062	230.559119592097	73.8870852010896	255.173753953861	66	155.980856561604	64.6440572215691	181.766826308989	78.0667309319558	159.757891088685	112.043608355616	168.081937068998	112.132317121832	120.381721829127	189.797526154826	174.406365351196	172.829199883527	102.941364590281	166	233.681195829866	261.010886921479	182	161.753371870596	246.28095147813	110.003116058136	301.946575262799	208.436716624044	152.969785228726	226.161642972807	137.47816755033	367.734742864502	210.17528880552	294.932195068898	262.724230716877	223.695385814661	62.3256393043286	185.291416459942	283.984016240408	164	107	70.1188374459445	141
ENSG00000040531.14	323	182.000253781689	219.735857097452	242	309.558198217033	355.755895028814	173	248.719590062431	328.780614742943	110	285.660738053753	125.912451233204	189.805511213559	91.4714681696579	260	117	289.962484874248	186	214	177.89188472148	157.004896582653	295.891043651584	300.489455691341	355.004370303349	143.025590834252	185.014766471133	386.692809102424	418	321.51921609336	281.933243690795	457	190.007999921875	450.859610550239	262.021225815159	189	365	235.932126856231	487.980394685679	299.885793827604	401	396	442	91	286	443.914040115626	214	156	115	196
ENSG00000040608.14	55	25	20	33	28	58	20	39	32	12	15	15	18	6	56	15	29	38	18	44	28	25	49	51	22	19	38	64	37	48	50	29	86	66	42	74	46	68	84	47	65	98	13	37	58	24	24	41	59
ENSG00000040633.13	916	562	924	1063	946	1229	799	720	1296	481	1238	268	763	550	960	437	932	786	793	707	894	1085	1074	916	675	627	1483	1360	1032	963	1692	679	1410	818	840	1431	826	1882	1229	1362	1600	1347	317	1014	1559	820	549	746	539
ENSG00000040731.10	3.05884938962319	0	3.00034432576323	1.00004328026484	0	0	2	0	0	1	2	0	1	0	4.08046508400108	0	0	1.0290525965055	0	0	0	1.04339007837811	3	1.00003029232306	0	0	2.02484417020774	2.00127759637127	1.0231794419569	4	2.02296563683555	6	0	0	2	3.06949167929437	1.02470201125344	1	2.01121583023781	0	0	8.11400179071968	0	2	0	0	0	0	1.13695245474282
ENSG00000040933.15	2039.30518098495	1109	1723.21193166072	2002	2300.64835271328	3851.62436282417	1442	2507.39418450065	2811	988	2135.27136838842	821	856	858.653110355284	1946.64305552955	802.70359050745	2944.40778204937	1764	2674.14748303495	1464.2973552791	1751.30950579295	1733.37437435437	2637.28168475291	2534.32790579449	1022	1519	3602.62008629635	4475.33331675061	2281	2681	3839.20922010451	1227.54902037788	4634.71731733313	2757	1908	3884.43331824734	2413	3793	3694.50142462683	2116	5523	3393.29080600547	659	2158	3429.38694609291	1222.71756430758	1542	911	1974.11885421668
ENSG00000041353.10	138	72.4122604537437	84	113	250	160	89	192.135706332796	158	60	158	82	22	71	57	48.5597880092746	200	111	257	92	134.208033629575	49	120	119	81.0898066525632	105.178042213068	276	167	212	126	176	132	197	270	121	152	182	152	295	34	152	148	46	90.5407710487733	193	41.2299564947172	52	40	147
ENSG00000041357.16	647.003964910768	227.281523232499	341.021118149134	310.010996195024	743	458.039201703403	298.003802579395	573.001954292783	698.252006746706	148.002109254562	554.001611124346	191	179.531895914916	161.954726062003	573.030842792638	286	1057	391.024459994808	833.004183505927	205	447.194566141392	843.068083798404	513.065106987943	298.014583622958	214.001996551472	635.612390699579	834.735496137464	1099.03375698257	1605.61163856064	577.031281268714	785.041318470802	196.013937867733	1174.52444057672	1586	603.000944825268	819	665.001311006038	1981.80045819064	3265.52605509059	401.095044025799	856.006917111962	991.189535599136	284.518759282321	570.010709962057	633.590706582007	278.006431450684	670	322	446.001541351911
ENSG00000041515.16	3.0126326687305	3.01161304201707	1.00565946648979	33.1392089797851	27.2005516173798	9.0202174471212	2	9.12178025502418	8.05233923768308	4.03401889514513	9.02986160328896	1	3.00845964060663	7.07079537786612	8.0619168392658	6.05684373046142	5.04896926246587	3	19.0532816928097	2.01376831407936	5.02628479171869	4.00419760024026	18.0217313364018	10.0440337644594	2.00436420979548	7	28.176644815548	18.0941202065958	27.1671288748796	26.0597313276059	17.0953496965389	18.1079836113878	4.03959715794892	12	4.02516972042544	21.0748239064644	6.02378513130589	1.00639576241141	42.2164627922128	10.0767510712968	7.0448626385728	48.417049687632	8.02924694635764	33.1656816013518	70.2022685860191	0	6	13.0059924203783	3.03480807370673
ENSG00000041802.11	497.511885603347	303.475057040609	532.396990626996	654.095749467614	491.928985129553	731.642992810114	485.252481100072	692.486412661625	669.120882074509	249.096444827079	518.640660830045	296.039090630003	315.828694203551	112.988915884412	494.487886124	237.104423694813	569.787600646482	439.395905768406	577.528067569574	370.928645753445	340.036286018437	714.265813660329	642.885845865162	665.454310394069	298.246689289112	363.859183358959	962.29550504405	979.848878449808	691.17465579734	687.538424471608	1081.60510342529	388.104539814716	1160.06480999536	1064.10574884569	631.493011309228	818.409437302635	632.371540658243	858.524560723509	911.896297567057	811.439715243068	1199.06494439189	915.985696286759	203.317793469187	661.996690189802	1297.40313753655	493	558.244164772156	297.357709329903	631.419871077734
ENSG00000041880.14	129	105	95	131	180	205	90	158	178	72	146	83	80	33	133	60	144	91	151	69	105	251	161	133	74	74	184	205	176	84	245	81	238	301	98	140	165	259	343	180	244	245.716081097553	86	136	308	90	70	77	206
ENSG00000041982.16	14.0765570057958	7.53420858023485	7.10412064884941	5.09230180008514	4.17563908102004	8.28554164734609	5.03906012299534	7.04140479587315	4	1	4.23822256276609	1.00822982980686	18.932319779973	24.8172973901977	12.6205716122812	3.06442746991157	11.2383581652064	2.2192604684144	4.03198194230882	3.00213440456456	7.10418289376756	12.6554551614052	16.4311305526263	9.50419624264844	3.18663529915728	1.04641514066528	16.0540335134569	6.32327756412445	1	5.17808294959276	7.19775163199232	14.6418265127777	10.4844053320548	16.0008381066281	5.11488250653127	0	6.1038604057053	10.2687846691106	16.9142577901455	5.10187239541978	6.35240004663065	66.3869592778497	21.3450798265126	5.72151964449225	4.226715762822	4.04720666143259	0	3	0
ENSG00000041988.15	213.06137803529	120.387496381554	133.723820247797	189.017665197877	231.539455522019	258.727459320642	147.613991365944	160.804928075445	263.534483382447	92.008177232545	247.941887155944	106.521954172677	206.450596581937	67	285.151385595959	110.507513504501	289.870637346829	158.402938396409	217.500490245693	144.370718056417	171.391926022475	274.683251366	243.171582926238	203.535272633364	127.492411761631	161	420.54524450034	343.417015951532	257.760005088054	220.356732360266	283.6232881832	136.385895545751	344.003962331277	295.026727990532	248.476670002107	308.756231758006	242.507526892369	451.622382346747	377.511089589804	319.362789346667	428.07528080085	373.737961658892	112.707011808668	222.322666296336	405.502044240819	204.09888471638	167.108920557544	163.358006842261	121.37815263272
ENSG00000042062.13	76.3399956415358	50.2753558173838	58.0648895475532	53.227019593448	106.391637682985	76.4921801941715	84.8351894892564	85.7577937129447	102.261903082483	51.3700571755993	95.1614264098761	75.1305000742939	65.4854028610869	21	100.629797422956	84.5179047504333	74.0826084656874	65.787517574854	66.6103314969122	76.4341708036476	54.4749409335584	87.0687615684742	89.1088687120011	81.7195777840992	54.7388614901528	69.746065257874	103.154201286834	117.690495604039	113.640919679361	106.673632729413	117.639142596829	143.986109995881	94.2297720171733	118.034221989232	68.720366122318	125.496334847435	122.667642594531	113.094885780941	135.920418109949	106.511936842556	72.4445272434575	138.519427239084	95.3032456335854	100.056452983804	114.821624353964	61.4569172268976	55.1817920405894	58.0876227772197	53.2542069679155
ENSG00000042088.14	343.923536247763	205.630082305297	305.77978170122	325	285	458.341800448564	256.127867722809	330.293487322044	400.260635722813	143.876850904116	237.088504639966	160.217207868872	154.68563489938	95.1157473923861	294.335075835882	143.880390138506	354.443029726672	340.655276274964	297.596493949645	219.828179933662	215.698246181576	340.573551699523	436.820459921723	413.394580436706	226.968369908288	161.684972577291	518.776953670729	571.604815471179	332.958813097309	356	585.593673375245	183.058464417356	654.733621382366	571.852395878182	269	555.447277087887	350.478549135323	533.613451144023	576.299891069764	380.437237820848	748.593543192004	611.666961676976	181	377.593113079744	714.790972027922	231.883033383857	227.651470641924	218	322
ENSG00000042286.15	145.301718642426	67.691041626069	100.095610388356	86.5198029633036	175.8482040747	159.237899642993	70.1357191252841	116.599531230766	161.964302410694	57.8269234404957	93.0964655085299	75.7098202900179	89.7338313625792	45.8692598393895	143.797283893504	46.5250858467535	195.890911473142	96.7109785079798	122.384014392363	87.8968907225633	71.6835907481947	86.0666792445152	109.55764506529	148.219573315005	59.8715783063708	69.578847794291	248.354805428299	204.374322142305	132.119548932759	173.798261598848	204.36038614091	83.184879895161	226.459654808424	219.69143340568	93.9167834680644	205.206760829185	126.670250996122	199.019351672986	286.593289838824	192.326869399097	241.190071985973	253.773720625755	60.469792531123	136.663539779597	193.216152569328	68.5684441756459	63.907987008832	68	113.290234260584
ENSG00000042304.11	11.167349143513	11.223304637628	8.04132858288878	15.6528934824914	9.24545015951089	19.1017635649562	10.9299219840208	11.9122444912721	20.2140405328362	2.00963189899347	20.5631025100436	11.5075629949154	26.5733416710675	31.2747694281977	16.3142602556078	3.05602279983612	8.93970408281337	8.06710842909508	8.57897733457281	11.0598410882687	11.7219884773509	6.61703164888065	25.4720658582245	9.10620163440355	11.8829335463332	10.8688433481715	32.5941811574498	23.207632935733	9.51844052856523	31.9713636826663	20.5023904960603	25.9282166401688	24.4201015078915	9.35247906054772	17.0689910400881	14.5552322655188	9.20402768411516	32.0086057545512	7.31928937793746	5.10798469147834	40.330754607302	65.3655379203279	26.195803722697	15.5946256398877	17.8970910213356	8.04512547462009	7	0	6.56111076813249
ENSG00000042317.17	29	25	25	25.5333163597378	20	32	10	21.8468325377824	20	8	21	12	23.1260459623547	20	18	18	24	13.0873855972312	31	13	29.9345057511425	24	42.109459215381	33	20	9	44	49	38.828	26	39	21.0203283460241	59	46	14	44	31	60	77	21	57.8009259259949	65.3326046104787	19.0647513756593	27.3024265223308	30	20	15	24	45.8939860916915
ENSG00000042429.12	617.846777819679	348.025068786994	448.03304598764	672.216208471089	749.603049606536	977.584918249303	524.40550887386	602.524284068968	876.264809297057	296.127926549966	762.218077037484	194.121254620798	366.303925657113	312.544246683813	628.325337684441	267.846879497159	841.752524699374	566.514305342205	740.196125645644	429.54308519885	572.069170739744	712.847489894035	819.996137730185	658.534064117625	328.632020114162	333.818139442414	1121.20443609652	1142.81100698938	739.777373842606	664.173953094871	1157.92980819807	395.590794857174	1261.56872851882	758.680719747572	651.609585308873	1008.7140594873	633.473271684169	1199.12270982317	1183.27577877281	709.203698061681	1205.46839331523	1220.15182486074	281.146691901573	676.825618430576	1112.51817804893	412.833090627927	541.35684989683	365.26247839702	462.523070190485
ENSG00000042445.14	428.456814340759	357	461.520488261081	623.062663142454	775	942	513.449964605388	686.347775307883	723.919351202747	207	595.882188666759	232	297	181	626	241	755.45381084791	422	543	447.62362685074	584	697.625378036598	481.637146524242	591	260	411	984.980134145445	748.503749563825	649.782047802233	680.203942053804	1049.34139026069	319	921.633613838999	735	436.496842058535	950.654764349291	545.778145450966	1002.62556001905	1126.03652776406	663.745100162006	1339.97551386449	814.864579202341	194	713.575569067964	1095.63524100005	307	469.572629415322	375.198700928081	542.57402441462
ENSG00000042493.16	2346	1165	1611	2211	3472	2778	2355	1784	3524	837	2686	712	3865	719	2812	1299	2547	950	2000	1102	1668	3905	2876	2216	1165	906	3127	4203	1918	2137	3709	1470	3860	1948	1968	2577	1800	3962	3186	5289	2098	3376	1040	2173	3485	1973	1419	1350	1024
ENSG00000042753.11	938	528	798	880	1288	1066	1043	854	1187	860	1217	572	1362	347	1403	984	858	612	1160	826	761	1302	1000	1154	737	867	1431	1313	1313	1056	1734	1078	1316	1296	1064	1396	1305	1943	1481	1851	1124	1266	1196	911	1517	1051	513	888	701
ENSG00000042781.13	0	4	0	1	2	0	0	0	0	0	1	0	2	6	0	1	0	0	0	0	3	0	6	0	3	1	0	2	1	0	0	6	0	0	0	3	0	0	2	5	3	24	7	0	0	4	0	0	0
ENSG00000042813.8	0	0	0	0	0	2	0	0	0	0	0	0	0	0	0	0	0	0	0	0	0	0	2	0	0	0	0	3	3	0	0	0	0	2	0	0	0	0	0	0	1	1	0	0	0	0	0	0	0
ENSG00000042832.12	56	37	36	34	36	49	24	29	57	10	51	2	10	27	37	4	55	12	22	18	33	23	26	37	9	22	47	57	34	27	27	18	29	22	16	57	14	53	26	40	98	84	8	9	29	12	20	4	11
ENSG00000042980.13	316.588173556161	203	127.978682352726	306.228928521388	236	477.258982983414	227.573679826587	449	373.379664993044	157.903308705111	206.135273663434	138.192615321625	169.93704937344	93	220.498138869127	77	779.25053532179	231.185078723655	482.219498951655	182.327746166998	186	291.038233919799	410.666591299165	366.423400860881	173.683836121222	288	798.45772506381	334.270843841581	755.240290449592	619.255956787163	660.387841324034	184.249602635005	1049.45388768832	601.513867309684	148.718365294277	557.369214879917	251.079184855782	400.146302684574	919.742916093916	555.694418746345	893.033663826165	433.749087677586	139.625315509849	516.007278441318	861.467672730235	252	449	199	366.133892913876
ENSG00000043039.7	3	4	2.15516733604837	2.05257793211381	0	4.32278150064389	6.91538624593708	1.56431000816147	1.46301827756398	1.010192465941	2.03460659875864	7.7391796108698	15.1878008728296	15.0498026624166	6.23060640333836	4.01965712144644	5.6692809151646	5.00257929153625	6.09583658174424	3.29400387928475	6.49600409000813	2.16923743916368	16.1875705547707	3.12762739107736	1	5.11791564776342	9.04018624399245	11.1922910017145	3.05522213655049	3.42668590194837	6.12576038447781	12.8739343178304	4.3078300973248	4.07204979563073	3.7668300140892	4.12869164340564	1.19499002349347	9.78927974301991	4.99382966834742	8.40598946256187	4.1962914022985	44.0288488517966	5.01695665147444	2.29586564906634	5.49536988274899	6	1.23338335187164	2.00046600005448	0
ENSG00000043093.15	616.941741003692	282.651704830448	431.056367071676	510.010907994206	764.127040849287	938.50092929868	337.96997662886	591.976958303208	904.059664905032	258.981436850243	772.904391519545	222.829021613053	183.673133268055	235.143678868841	407.103327553278	427.032803478712	975.170507261596	571.104603132665	988.659278317605	520.982695251678	649.961790111413	808.212604153564	705.035706744703	458.1812133382	305.978700833984	556	973.830959544999	1150.24617393225	763.025651572131	676.959539895653	1014.0011988589	373.458214514161	1011.40242329993	852	670	1023.43069385614	808.010496895582	1317.09438261496	1196.39214604508	359.918803582837	1208.93483355268	893.624108777527	257.703756119677	491.144088126007	742.737486193334	305	408	256.380446746375	456.060445136419
ENSG00000043143.20	1555	947	1303	1787	1403	3144	1331	2497	2074	1037	1701	806	749	659	1849	694	2086	1633	1845	1589	1157	1741	2529	2463	1139	1121	2895	3495	2170	2093	3945	1206	4428	2749	1503	3131	2275	2692	3112	2327	4132	3205	758	2005	4238	1117	1483	1132	2117
ENSG00000043355.12	0	0	0	0	0	4	0	1	0	0	0	0	1	6	0	0	0	2	0	0	0	0	4	0	0	0	0	0	1	0	0	1	0	0	0	1	0	0	0	0	0	12	5	0	0	0	0	0	0
ENSG00000043462.12	5816	4208	6710	6663	5837	11051	5208	6435	8941	2836	7345	1672	3370	3227	5311	2376	6718	5024	6099	4807	6215	5604	6227	6129	3505	3637	8653	9229	5884	6259	10499	4104	10175.984180834	4531	5624	8556	5236	10497	6512	6930	12017	10446	1573	5688	9833.99399909737	3514	3383	3313	4253
ENSG00000043514.17	173.189987665674	116.00405971826	121.32688244986	161.084591939962	259.019340299919	282.066726484708	104.091421804722	158.355276653209	234.367696430258	69	197	87.1388416453216	138.762937506195	52.0733657959755	200.238599280977	88.0008088724437	219.113346688094	173.001195291115	224	130	131	272.063122616215	252.509946193158	248.154362884206	91.0611468522851	213.604298239016	385.207651370185	317.428186775275	275.216237016084	207.470523713594	388.064557190399	125.389863488887	390	357	143.089701951426	320	208.123554802805	421.463548614925	412.607868604652	248	363.399486116006	330.779186166816	67.0542999859682	143.832151594572	305.188979585505	115	140	101.004513125525	93
ENSG00000043591.6	20.2961975847213	12.2126724835681	2.0352014298233	26	18.0116662983323	41.1301096861032	21.1611495051764	14.0692738168046	6	3.04314249216324	19.2958875070882	17	22.474857153265	22.3015731844947	24.6062026890302	2	8	7.23942216116987	13.1112013269087	10.0926712563743	4	13.2990361089838	42.3192563841702	16.064114439584	3.12247657791578	11.0895841432415	15.1321967898758	9.03238823175066	21.1525021679068	23.2395777483796	16.160652352311	25.2208991662356	10.0321848520164	37.318208208677	5.07663977027599	13.1844023238958	12.083570569499	39.1445630564883	32.2002751411813	28.4215237910042	64.7101011040236	81.6543242120807	23.4334559632739	21.4035138538039	47.5085646075433	15.2095383040816	20	14	10
ENSG00000044012.4	0	1	0	0	0	0	0	0	0	0	0	0	0	0	0	0	0	0	0	0	0	0	0	0	0	0	0	0	0	0	0	0	0	0	0	0	0	0	0	0	0	2	0	0	0	0	0	0	0
ENSG00000044090.8	349.385099049852	217.441465655617	257.793129045493	313.123381167561	420.71856670826	462.262292901613	239.483651844694	339.035373330341	478.730574279028	201.499408404239	464.879740166501	197.170898464443	215.7224031315	127.089520925314	389.934084853617	110.655156983791	485.578400796462	246.696922979819	289.927578695058	225.4136736431	241.252139030446	424.455061941582	439.270090008072	386.069207094635	190.243698392646	261.89793456883	634.535491829708	639.526064288928	408.092995830808	333.548384649946	601.277739292954	160.924271770959	770.204578396672	459.162948377606	313.745428516235	494.763553842993	295.185007405689	704.249661100371	478.708792850274	513.080446250189	792.42835573784	584.254417088115	120.711950595437	356.060919771183	717.650721818949	293.291729517195	287.861179595905	286.457513233665	308.67873806407
ENSG00000044115.21	1697	1016.25766397627	1562.13197084199	1613	2344	1974.99860294025	1331.08684328813	2133	2001.25339648482	1362	3642.90941055467	473	1640.08382675015	880.315326486186	732.380312356794	1091.23363110534	1802.35469951604	1507	1708	1602.26122170723	1770.29840619849	2481.18190178168	2292.448818376	2428.68724073128	915	1302	2495.62476992492	2871.21006721675	1750	1808.08202388562	3937	1403.14030055892	3266.82221709802	1579	1492.36137499457	1186.68542986709	1493.38804425514	3731.48262406777	1661.4083655734	3330	1937	2436.81225745478	523	1595	2577	1732.83238184169	1075	1223	1061
ENSG00000044446.12	1236.81144807391	708.981374813746	977.851467362433	1228.36232708899	1204.65927533526	1565.65176560742	843.148456517153	1066.37000793896	1590.75562182736	572.571624985395	1635.03665350892	360.593233504838	825.482257404031	891.319295603582	1142.4039209558	461.253184635284	1533.97503896112	790.943779376953	1189.46683277483	787.15731839807	873.04031376022	1184.03244071517	1096.61827553389	1280.43145762413	661.498317682931	782.129540305527	1806.20768656589	1877.42383204227	1262.71250665264	1367.77879213904	1928.65368078019	663.571429417614	2081.47220833357	1111.2851966206	955.119282445289	1845.2605280428	922.850217526131	2434.6494313242	1705.37268303883	1521.19452234476	2195.04789606348	1822.20281829661	325.465143338525	1336.39561221483	1962.98161359057	914.502381182387	796.1217032093	761.45042332222	731.206413702818
ENSG00000044459.15	65.5409908156321	42.6272569392147	38.7133797865747	52.1241065509883	71.298171247584	75.3656362302551	19.6407050031018	76.2353730678432	90.8652933790919	20.1720497472672	52.1718171311935	14.454761625356	45.096317627913	39.5692531385872	43.9749019353869	17.5642300660968	86.2727760075272	33.0200966377908	102.771338637234	23.2805365778271	42.1718797458148	75.1386581414559	51.3278605072784	59.3578219438564	26.3254924559337	43.3232508965849	105.238888374359	124.745822246213	96.1818025971251	51.1558787278241	91.128357072154	44.7439305589696	96.8889045441054	62.0397389140911	40.7204960665861	57.3998745324787	48.815741717903	143.232149462726	133.369144043438	78.0504562934226	77.6005264165458	157.701280288972	30.5810213853421	40.1171761837812	69.0791922722916	41.5296548271946	25.0436510418517	24.7450448442547	57.2382475662973
ENSG00000044524.11	1	1.03035716734806	0	1	0	0	0	1.0398049001686	1.20000084162836	0	1.0029712569621	0	1.05087048137455	1	0	0	0	1.00569277378382	0	0	1	0	8.10782666787837	0	1.30630470865447	0	0	0	0	1	1.0004892786171	4.09110741728599	2.01975001914078	0	0	1.0001301437365	0	3.00131175732104	1.00147345910388	3	1.0115689031192	20.2520428327022	4.05914355963725	0	1.00209365472967	0	0	0	0
ENSG00000044574.8	3396.57819874413	2639.62468410603	3498.95165950407	4035.72231282161	3382.42206697006	4688.75321770893	2306.79641343312	4027.96361473945	4482.3683948299	1993.25416076838	5340.51535327817	1215.29781888895	2434.32762551808	1420.63951685767	3077.84452727035	1587.61415855653	3628.65030510661	3697.67738529451	3050.47070026041	3025.56613904956	3220.70074751861	3916.03202994014	5162.72742679277	4784.13305119397	2130.44479755698	2432.7734077711	6268.01073945397	6422.51495241338	3830.9520478499	3663.04166192253	6991.65636473593	2772.38360524842	6385.96825816042	4364.58112436376	2999.88152059799	5250.77843568998	3143.95123777181	6262.71713334276	3767.35585236118	5339.48827548358	6981.70706057124	8462.0944577938	1301.4222391392	4309.72051001909	7096.19781337722	3798.51111210888	2447.83738427943	2816.15863865092	3209.51674163807
ENSG00000046604.13	4.1508148299528	7.13816527623126	8.33530831133012	4.14696623331947	12.135521767192	10.2196420291677	4.06209300469211	7.03245247137284	19.6239800182555	7.03345536939167	9.43098494428147	4.09104280606339	9.7878800719849	15.8404399008298	8.31821441095102	1	10.870637963557	7.15898246361063	6.25697614986838	4.06914462776297	4.44897017927633	11.6990504182771	12.4267997809575	7.13938185061973	4.02037729303244	1.04451204308096	11.2236766771875	22.9428495905737	10.3339216177502	4.31212380721272	8.1699863000488	6.45552007746857	16.8689953498921	2.05561299319805	5.02087001034182	7.17308754540857	3.16939263419104	6.39716608128275	13.0846215885903	20.7735234447189	13.2989826963909	53.1089123711475	9.1045714379377	9.02655925951009	14.1786903102892	0	5.28563139102102	0	2.05866085671293
ENSG00000046647.13	160	64	73	129	138	155	70	97	180	60	88	37	91	32	107	37	117	105	129	73	77	173	124	124	75	69	169	246	165	135	239	49	259	164	117	221	110	226	283	166	306	211	52	130	264	68	98	97	106
ENSG00000046651.15	800	401.960466830728	590	550	668	1014	326	675.990336352723	803	226	522.924649269457	342	232	227.937435430582	848	257	1032.9811278697	701	713	490	431	605	873.930089918137	889.966657478185	359	566.999006160036	1048.9661930985	1344.95543317056	868.983305297663	755	1126.97806549965	350	1785	1266.98466691385	685	1606	747	1215	1628	809.96099703793	1660.95959434637	985.913964913759	258.865382497356	655	1372.94260306714	301	428	398	754.69094312984
ENSG00000046653.15	13.0156261251872	22.2108239641135	32	33	41.2047217154254	61.4745328975682	14.1720384274643	40.2980082028555	49.1067360325642	10	20.4530190996753	22	7.19316517248508	21.0936976652201	35.9346433950049	6.0839794294663	59.6571811143836	20.186999862309	63	24	21.1383752514653	25.128450435982	41	22	16.0962411804555	28.5202118709191	65.2313697889982	92	54.3287187825606	34.5310821868843	42.4434099394841	19.1713605686512	99.6635525526845	33.4243157195087	35.269913956261	58.7271891479705	35.8185725061224	32.2641029419922	74	39.5640460633588	101.185796667786	76.3972672779711	6.25814711197176	27.0917957039602	48.14221406879	10.6160112018867	20	7.16611406508001	29
ENSG00000046774.10	0	0	0	0	0	0	0	0	0	0	0	0	0	4	0	0	0	0	0	0	0	0	2	0	0	0	0	0	0	0	0	0	0	0	0	0	0	0	0	5	0	2	0	0	0	0	0	0	0
ENSG00000046889.19	2.00137984633774	7.05067243088107	2.03008232420407	4.00419279337005	2	6.00040476001459	0	1.43919746139657	5.0003166110355	3	5.0773333000192	1	0	12.1601025411938	2.0354193015786	2	10.4776707427635	3.62112326911573	0	1.00379834136929	4.00637155655275	2.00031146476129	8.07853862481822	2.02206847378848	2.00187911141194	3	4.01390659411318	4.65709659617682	0	8.09026623469527	4.00764419508874	6.05037572035067	2.0017523215953	6	3	3.04330828994429	2	5.36407542146592	0	8.11458732111679	4.00137199319979	55.1439917638126	11.4764287800174	2.04517509466752	5.09035260668741	0	1	0	4
ENSG00000047056.16	937	493	638	992	1065	1290.67011351637	642	948	1268	470	1074	348.954646945284	443.232842462241	330	821	325	1077	760	1006	698.753759566782	752	883	1046.67772754464	1076	444	690	1516	1865	967	1138	1846.73401334174	660	1935.65050643281	1165	759	1594	936	1575	1418	988	1970.95559656185	1516.85740656003	266	822	1578	665	705	501	703
ENSG00000047188.16	355.187106230044	258.239336104779	338.024054517422	427.064462728698	545.93248133946	747.054316421611	242.023049000501	565.021079197357	606.647691592223	155.112391012685	324.860350269577	165.003336237128	123.197590795166	102.114005447588	320.404473796655	150.009548251415	570.353196181613	415.009026061178	615.024223307425	291.146993852764	379.036148853787	371.077730743696	571.567464401702	382.026793155843	202.041517757122	365.90104522788	865.019694492867	945.797692850031	722.013399655611	561.003447212988	774.002262697933	179.103282356357	1045.37841828963	780.759083335628	402.636266781611	810.043615933265	493.02204875153	643.002409357869	1004.49972401545	357.057102934954	1068.17090103038	852.937977814347	139.176382349875	434.329742645478	741.020159047353	258.089277234482	396.102208003039	220.015736938864	410.105045156392
ENSG00000047230.15	82	69.3631725712353	76	100	88	166	59.6329658428374	103	127.302437924779	42	113.400063083737	40.6737107924553	43.5235457333224	22.9719868717073	85.2205023199229	35	143.323168738552	63	117.83256027161	63.6287083128268	72.2274519154747	171	127.948669079661	133.944436875072	58	62.5328949046735	164.578462618702	188	133.330057188891	96	203	51	219.655717795836	129	84	167.915945604663	78	155.869022772611	152	158.665496287986	226	162.990009868453	30.5540577358108	123.465105524135	179	27.1555386720732	98	61	67
ENSG00000047249.18	414.090774012429	245.001366890964	279	532.000540113096	412.000369841192	613.825125189556	394.051494549978	422.011632828408	590.990725733964	228	620.025108054117	177.051508190443	337.004861271771	139.001457296288	369.560570673783	227	463.014459218245	347	450.000352822479	301	405	567.582159214286	501.00100193761	554.067375459575	296.000186321002	365.100455712065	717.150634517049	761.784988050132	436.961998849575	462	845.042770501627	329.306639108537	737.021449581119	569.032539234841	426.000676977259	668.037427384025	443.103879593214	829.052432897465	615	645.123058768213	636.035883466031	728.200674675275	214.014015556019	376.010703338454	841.255633695309	546	352.047936078197	403.068746001275	314
ENSG00000047315.16	1842.57813921836	1017.85693026382	1413.89586186451	1763.24054785433	1989.95953908765	2306.08414661257	1122.40973875341	1699.47043771469	2632.30677606693	803.843749082776	2131.26930554469	610.474294638621	798.750478628867	504.302066296389	1315.04105411645	759.289863459844	2520.25507964383	1745.39449687774	2340.76885333432	1166.33657782896	1608.03810427336	2012.82292259101	2386.51650450789	1820.12338725969	1057.98498335244	1451.99796412046	3760.06315595807	3637.92182948595	2665.01692722127	2214.38149016664	3662.73585699845	843.248346289092	3884.52511801369	2982.97625224466	1727.87177691961	3077.2954081978	2157.02278010517	3724.66101847205	3475.34091032224	2002.27103418502	3975.36025735006	2796.0548901291	586.454974529534	1836.81654680763	3194.70079776023	1290.77846106207	1632.45409485522	1009.62097917029	1777.28831240746
ENSG00000047346.12	426.293900971118	361.999257163604	509.44447071811	641.876617303023	658.719789789222	1041.47154829602	391.982938516062	803.038499161271	848.861970635739	276.836552494876	695.730821629275	215.225872195949	114.948127348564	219.011895426839	512.712030808501	169.562736827294	1125.24793785772	624.148651561982	857.668903523001	427.366017230446	714.920177796023	680.781361731382	904.072562739557	496.745874406582	303	492.519184308648	1228.03302802416	1319.52390170399	938.002876897705	998.304106484259	1048.72293925675	348.802326047992	1555.95588993286	908.658098162826	566.79790977901	1074.52736701168	585.048081452288	1397.59437648558	1202.16729457152	480	1728.76381512375	936.978087360772	208	710.920134852075	1022.09995451762	287.155589926197	602.295080336422	303	642.476017555157
ENSG00000047365.12	451	254	376.015259512402	435.20342410672	677	1089	357	871	860	294	612	285	168	90	494	215	909	550.02265231244	1014	450	632	569.011155094022	758	670	214	481	795	1522.02030156087	849	921	1227.01879657048	284	1474	1231	380	1127	766	1138	1484	565	1424.07945814846	1086.33225480604	207	615	869.022070350952	205	529	191	640.009562165637
ENSG00000047410.14	2453.340877707	1866.58362013911	2767.34716741527	3293.47024187262	2564.86742220925	3874.11070910529	1816.22504464647	2754.93667801444	3957.73965577768	1092.27026364495	3912.74830208407	836.95582089306	1230.32795021071	1168.57791005792	1942.60354537476	1181.87479645605	3468.32638200831	2660.33500809078	2527.00927709875	2145.06527582189	2855.68546708465	2771.80655682099	3949.59070302003	2973.28510089061	1582.7782689043	1908.20660406593	5328.16416353723	5473.94353572506	3367.47976019678	3369.05880836594	5366.08945631681	1563.25350524115	6135.65783554257	2837.30650361896	2529.51678618361	4124.07679580637	2831.45572123591	5022.19115751463	3712.7814300677	2824.85376736903	7138.99689920208	5271.35432635083	702.250291290974	3324.55016196557	5923.70316327724	1962.25496418454	2509.78332363071	1842.13497615083	2347.95638098847
ENSG00000047457.14	9.87882124293278	1	2.40698574631727	3.42151400698578	7	5.0133938055238	2	3	2.12213353855649	0	4.39637616568249	1.28674270827814	3.64643756016151	6.61745371198444	3	2	2.14654127578243	2.1043072552983	4.47273123982862	1	2	4.31434016300112	2.28273889111426	2	1.21420772640444	5.27927561361335	6	0	2	10	2	10.4872203273542	14.0176503882592	4	8	3	5.09259688395579	4	4.43311210040469	17	4.76125065176115	25.582833707666	1	4.68230849263639	2	2	0	1.4276139653382	5.48459795327897
ENSG00000047578.13	623.76381532703	423.088822634434	669.881214578662	704.744998321875	796.945813988354	1261.11717307022	453.158524884127	685.036345833333	1000.86606995628	323.075835985	1023.40650610284	213.061228496024	326.233036926687	451.766922002304	759.684429009565	242.213161051429	933.491887268679	518	606.555686447458	518.268218610621	630.397014758518	687.175742749409	858.449545070844	625.577412384814	405.994519793984	501.438739772462	1348.72379740255	1185.53308392199	759.94636030151	847	1015.29837910736	424.022536001388	1372.74805213688	571	577.435629978073	869.91299018263	525.330795728768	1506.46674430575	836.035099755961	620.856934446595	1843.83944044268	1051.08115298774	169.007234200171	744.650270034241	1136.57556705617	365.020482177488	428	353	555
ENSG00000047579.19	411	158	255	310	400	495	319	329	444	149	373	141	292	116	368	162	387	294	333	213	227	567	363	373	256	257	597	576	497	337	667	234	605	594	337	433	345	708	531	560	599	558	200	399	595	317	247	341	288
ENSG00000047597.7	159	72	196	70	178	64	94	120	212	130	109	157	92	46	210	890	55	149	443	296	195	137	106	160	154	211	188	134	216	118	113	169	56	225	210	296	659	72	103	62	51	148	93	121	106	43	121	33	61
ENSG00000047617.15	1	1	0	6	13	2	4	3	2	2	1	5	1	9	1	3	3	4	3	1	1	1	1	5	1	0	2	0	1	2	3	3	0	9	0	1	3	2	1	0	0	17	0	1	0	0	1	1	2
ENSG00000047621.12	128	78.2099859229438	134	91	220	193.40822727336	76.605356590461	156.820057834636	210	41	136	71.7909918618419	49.0001208345412	29	145.999162667993	82.4741318783004	247.464408653676	120	255.355093862712	87.0511615680769	106.697670924011	213.655960418842	210.302309059562	148.751243799457	69.0596626597486	119.469624192399	279.982396835818	320.50650670296	263.65496117168	226.23129870609	228.834300037583	99.5028387303928	332.126292671958	324.479887398957	149.208421840188	248.069772644255	149	445.80088221777	458.327308318803	170.616907534481	321.137785010516	228.517075442179	52.3141070471944	147.012015658214	248.431514190906	73	122	51.7499142867919	140.394345795561
ENSG00000047634.15	108.873818160121	57	93	85	97	197	57	119	160.737158758351	24	67	33	0	14	109.779734422673	26	190	96.9133681249796	175	26	54	67	149	39	35.9073183823117	60	212	295	218.935487947801	103	180	26	237.8611869609	134.882022590348	157	156	104	121	275.90530591743	35	418.870638135646	185	28	81	145.437214107224	31	183	30	84
ENSG00000047644.18	2243.79497904829	1342.85752286817	2052	2328.8459914216	3008.98777672519	3861	1897.87735525841	2221.91916039564	3388.2180344171	959.441642546719	3116.58919573888	478.263776512753	1229.64661651282	1761.21507414101	1985.53935876602	1031	2910.88856449629	1707.51139488475	2062.92248439035	1622.92045898621	2018.29267053821	1733.38376398296	2831.77077075543	1810.36365339628	1313.11879017367	1328.31974991129	4217.78609537481	3925.767256906	2333.24061667361	2449.22975904037	3043.55325144174	1261.95717505025	3540.67756147055	1108	1761.95117199855	2818.19554165103	1778.81282149085	3668.27812017062	2545.08195916332	2582.0120635564	5040.38383762382	3486.38011642868	540.626998187717	1860.44559770914	3434.49232465537	1459.1641779979	1509	1167.32715543938	1639.84927261574
ENSG00000047648.23	44	23	41	63	52	42	33	48	39	44	56	27	5	30	15	21	21	27	47	37	52	131	26	47	27	27	61	39	94	43	49	51	66	73	8	37	32	42	22	32	49	62	20	45	88	25	10	10	42
ENSG00000047662.5	23.7271609008229	24.4130972428406	17.2976878594435	10.9206795499274	10.230411678578	28.3468191448641	19.840210002708	20.0258859441186	19.7201235341013	4.61132021430889	12.1664882316617	6.85678038154877	5.08802212251688	11.4916350058651	20.5467696037123	6.91775868178449	10.2696492279528	0	20.7353497604959	8.55928381794809	3.49994554721678	16.3206517679204	17.3630000596157	25.5060100560054	16.0239428327896	14.3083711129588	25.9436591165457	14.6312184385919	10.8870552490556	9.47394935975641	19.6598376380483	10.8814770610855	27.376907296093	18.860371988797	14.6148330738504	31.4607995955843	15.7649562277169	23.2046263241653	19.3396545575064	25.1389618792424	39.3734906663436	29.5636527626673	5.05026125083155	24.5909272641569	10.3807099779319	12.1600381200837	0	22.9820112790415	5.18328054937639
ENSG00000047849.21	757.235146421552	613.039783387197	735.339530934202	971.075870272506	893.176193411443	1268.997454723	500.300791903098	1225.74935545782	958.961788054294	620.630614069408	918.995882727537	461.366549484676	578.976915119301	244.536540513332	773.573598940749	490.112424872552	970.406167409524	924.068487089312	866.775607927741	913.43699733876	628.410636665003	1109.49775985284	1480.31031754039	1610.52272200676	542.683720252285	609.610749865727	1384.43057755859	1685.4953239458	1176.42185255894	1056.42900308207	2344.44462860211	807.355879937138	2245.76537343805	1234.47194882224	640	1537.59917333181	1126.59639686429	1480.95371802573	1313.80657854535	1857.87767557897	1862.28917931347	1967.25004787286	457.398550595232	1602.70439896905	2422.17227710916	613.900168048145	690.331855148771	819.080552640738	1055.45934967975
ENSG00000047932.14	393.937335167611	220.984519368576	349.766595713859	423.951860814969	543	860.955723192579	231	585.740636996742	619.968972135877	176	398.911637722223	164	78	76	385	124	780.771825671316	470.934721864743	797.920348578078	273.925983471501	385.967587887675	426.822368106568	557.818055374548	415.819669580294	189	406	899.955493990708	1179.71358149211	752	594.980125034843	939.85579432773	167.748652927911	1285.79016308853	888.924095055693	394.610598846861	889.785084374387	541.953838745154	872.850985297444	1205.76129435715	310	1346.72831957954	706.788516321215	146.744816233757	436.862729625116	792.878868275222	196.707193683692	510	156	522
ENSG00000047936.10	0	3	0	0	0	2	0	0	0	0	0	0	0	1	0	1	0	0	0	2	0	0	2	0	0	0	0	0	1	0	0	0	0	0	0	0	0	0	0	0	0	18	0	0	0	0	0	0	7
ENSG00000048028.11	363.732840632169	354.877721670634	384.720945046546	366.382494929056	486.542146637789	581.145871823428	371.418865151959	614.131027702501	478.432653157925	281.192003713111	492.914140704668	349.114547407829	245.814804097297	100.454519001295	412.264933197607	218.067653676771	661.516533448634	442.725609390073	626.729047694194	387.65057522211	343.154531008298	420.813709791063	641.479859711414	754.707187267086	244.725352370398	388.063519299884	740.559660465001	981.661315363473	667.103799571262	746.944234618594	1024.42753697492	403.595579505474	1322.24970044908	1190.63563984473	368.444855131714	943.796165852393	660.832233917444	1146.36473673385	972.111939719263	610.771530730488	1018.37890177771	832.862867862078	233.743823715792	712.63199386088	1045.25762209452	390.830377354123	516.316416382098	307	643.65443342374
ENSG00000048052.21	253.20786472481	105.432299733059	123.283916222713	152.324220763626	241.546997427831	406.095593694193	95.766091943506	266.042420153073	316.339642504314	111.224556682308	220.861382301123	62.0389887915543	75.0747017232497	57.7587573936882	182.402944685096	53.0712651354267	324.87863149524	253.404917032227	564.86805835213	233.834939820689	195.542472704228	661.343407389219	375.329973202498	264.812732442108	123.572552048088	269.447136332945	273.068333313932	409.440645297555	557.057816413637	287.62588260327	607.983706712242	123.864325289605	743.265235315207	381.025487201248	142.178896695379	340.756364003756	350.599587316901	288.897424986155	562.280082309669	346.526719918327	391.817530228936	437.739516857309	95.4820840827196	237.458873270021	396.069606196491	128.653329464298	304.007436762507	201.016992110324	199.025065858979
ENSG00000048140.18	752	308	422	473	930	707	517	635	750	309	671	304	451	122	783	415	749	394	785	433	336	685	658	701	452	515	1189	1246	781	622	989	564	1254	875	552	929	765	1251	1483	1026	841	975	393	634	1010	514	431	383	651
ENSG00000048162.20	147.793534799278	83.114479343461	159.277533199221	158.990808565641	174.326136708755	173.752738497638	122.201257078504	159.849125175347	250.366490938473	53.9940248090232	142.59135960345	67.649798638164	99.6415293608371	54.6742353348435	207.480697958123	78.3336899351827	214.255099452694	155.225425099165	221.081162768234	112.115771820135	99.9462581203702	218.178401430514	175.478183811668	227.766237902215	119.605170499332	132.860066851435	235.958432624899	256.905587039406	211.500012820027	209.596630717705	318.480580293006	103.936857694704	301.031631454881	225.726918406013	193.029827342093	334.721930929037	186.247700475887	272.992970914127	446.247142740495	305.504550387343	324.924944024131	295.087591667782	92.5873763563388	214.048937356371	335.295738983436	148.526086303158	129.193651483237	152.28303942978	125.652581256087
ENSG00000048342.16	48.1306513068542	53.3336102567941	33.0031699088344	48.9652186516047	136.919929462348	108.712531088025	58.6894469744855	58.1071823855864	123.90523964271	32.6979107062258	54.1498409554692	23.2492297232642	89.7030901803874	61.6679888630989	71.9987283025262	18.1779976286138	137.596438907457	68.9471964398018	58.8218576473741	41.4105049792325	45.5487007773973	66.6315379488385	59.3174641353473	45.6867244776661	35.0830978067456	43.641034246747	154.333606254783	101.071289194065	91.4943867709508	65.0186632473612	87.4029581583591	43.7777560304232	136.173520300001	50.3064280092537	40.6779029837647	68.6285800406044	32.9386828627421	111.280034052746	103.807555473173	70.1686285414307	107.867019103746	149.748996720514	50.9176450683931	68.2196937284637	63.0447019407251	71.7966138167967	49.302044305148	19.3860132135501	59.679689359893
ENSG00000048392.11	813.001509049852	492.009635549646	873.011031151812	995	1171	2347.00824231456	598	1012	1655.00056757822	420	1246	191	199.0518695527	472.000095805434	570	251	1933	842	1292	579	1234	857.001110088941	1239.02988763152	560	410	834	2135.00083603622	2047	1278	1389	1476	494.07130726463	1923	806.018768924211	772	1334	798	2072	1362	508	2754	1514.29637161904	224	620	1318	422	829	294	710
ENSG00000048405.10	424	247	370	427	548	767	286	597	666	177	396	180	180	127	462	204	606	482	652	378	442	512	631	513	229	314	827	973	602	636	970	254	1104	746	487	818	637	790	918	427	1123	745	153	551	778	214	463	208	408
ENSG00000048462.11	16.0337816952276	9	36.0966205224867	17	11.4236350639805	4.00092646905541	31	52	29	0	1	8.36953260216545	13.2521529268718	3.12312901722443	68.8576233762336	0	69	17	26	8	23	65	32.404116895582	7	11	21	23.9947905889039	64.219591966719	81.8948970718982	34	34.2982874281312	8.70060333889804	60.4139370627207	66	1	47.8747960521477	8	59.914020445665	108.375143942793	27.8586540225582	52.7044099004682	127.612670839024	54.1675979853725	37	58.9838126594731	22.0416214145075	45.6834881835104	28.228332329246	34.3542554340593
ENSG00000048471.14	374.560791437973	438.732170214857	408.346436164553	723.557628037959	470.631440731414	852.727003480321	420.219298876306	674.916349784606	583.629844771639	356.966493415122	702.000190785292	256.968968840157	310.274362976777	165.864035129076	437.73270465143	270.712191373436	631.306628753226	462.856408742349	574.651584826105	430.71331489993	414.835773025465	736.373857612489	986.178707280451	816.647185095462	370.761955455466	390.929019258878	985.969741212025	1094.04947172916	759.693608804012	545.947084910617	1288.24854130227	491.41069691473	1531.01717226707	668.257652018717	388.303887099055	813.206655268782	584.259428001688	856.48524183164	612.787809407251	775.552190831945	1217.07540937604	1052.81592110969	300.497391664569	819.755711303808	1527.3988246073	510.445069254958	704.133309196192	363.333071754392	670.128619530803
ENSG00000048540.15	1.97609402502656	8.48973703332265	0	1.57161131146146	1.26405255411821	3.73291957028008	3.26787879543299	4.34638870298664	3.8059328397404	2.74909069517166	2.07856172187875	6.18041318267338	17.7959438147871	9.73368216206188	16.4263883846131	4.07312798528359	3.23648951704051	4.46734544174962	6.08766698293276	6.54043749740201	3.44335985165116	1.23966032163465	10.270066892008	2.31126357931526	1	4.7764416355145	2.26815236564648	3.54123903084735	14.4913188653018	3.49099908734106	3.76026342138403	11.2538361876966	3.81913529147398	2.58599230966703	4.01953131686811	1.41737113588168	5.04550615965203	2.39877436369916	5.02640479767249	11.7900462013015	3.99373882396694	50.2836164093405	31.03867647168	6.03910836845022	4.53544174012208	0	1	0	0
ENSG00000048544.6	348.068157568394	201.800798665274	239.509784951369	288.539693703906	335.232545813448	434.327251654248	259.053498897818	330.589655997517	442.370930294032	177.643015109173	278.969154375948	154.33443249667	214.024510675782	122.315669245454	404.306764884588	164.368192966624	487.721385637526	287.52724964291	428.188765554107	195.507899651764	291.288281569966	446.371116275963	394.479619960462	322.299658637449	197.945257096925	300.061447247511	713.785837019719	674.590685189502	502.716828927945	421.653911720565	674.575088028129	229.626288930378	751.801656442965	682.370250118006	359.079363134212	663.239908932062	402.004345470118	746.160991564452	785.349072165776	351.63057733839	609.143570433898	566.115063033036	188.100135459608	332.485536544423	624.561592669091	215.416268864743	324.612175863663	162.579291442937	269.875313811237
ENSG00000048545.14	0	0	0	0	0	0	0	0	0	0	1	0	0	1	0	1	0	0	0	0	0	1	4	0	0	0	0	4	0	1	0	3	0	6	0	0	0	1	1	0	0	3.55555555555556	0	0	0	0	0	0	0
ENSG00000048649.13	1088.26449264733	606.826305951894	882.041795013979	1050.28587756032	928.845687473933	1509.02368643699	621.366433979184	1192.70065105142	1309.7817627536	504.638140671509	1337.81790211953	455.671974539236	623.514368599278	473.065122013698	993.792541838759	476.300250914611	1365.65260070045	1011.67264938635	1201.8027723697	816.410853191708	969.723687495279	1238.55810033477	1201.88595051078	1286.73512029498	597.620556424108	857.751632901555	1769.27810143536	1919.14545982654	1498.47254826895	1253.62055755998	2156.18839616389	710.146469800744	2211.72714997313	1277.87261987957	753.647486088878	1685.71351881324	1117.59413955464	2161.46968622518	1828.86196671042	1537.92951914427	2337.44311656373	1640.15482801543	456.151475494642	1182.09107205096	2383.40831212279	836.991627238359	884.300934719603	698.406165977005	951.389189120475
ENSG00000048707.15	805.287586988476	640	738	979.377561844542	1061.38046118075	1502.32263486938	551	1275.33322101506	1129.16304478079	530	1094.23940604615	345	411	325	874	377.514656527217	1214.16371591161	776	1012.1497242063	790	711	914	1309.20542174956	1192	491	678.155993006463	1595.20548550119	1997.0711200696	1206.96134631163	1315.92744769457	2084.32272935255	622.14531209773	2434.71423038891	1122.10528797203	693.064542039417	1560.32588376635	986.251574616092	1483	1547.97368810961	1171	2531.20876696077	1737.82126095859	264	1197.77048127247	1930.38022737736	556.069788850134	821	416	1093
ENSG00000048740.18	7558	3971	6509	6451	8340	11991	4886	6999	11588	2769	9162	1812	3192	4771	6613	2353	9849	5309	8212	5299	6353	5384	6854	5739	3652	4725	12865	11419	7768	8267	12243	4003	11825	5309	5587	11263	5838	11770	9712	6576	15075	10015	1519	6017	9026	4164	4603	3292	4606
ENSG00000048828.17	3059.76378996012	2013.76207148039	3008.24356884372	3834.91722262065	3737.59876736434	5641.38626869333	2173.39915960379	3791.95697629925	4980.31860314572	1737.79039099262	4786.19109985244	971.594919166388	1219.13996329831	1645.12975069518	2646.39571121964	1311.4626926255	4681.17088103583	2636.15430850348	4294.4378126159	2740.9416976478	3480.6365687289	3904.65009479532	4230.52862068025	3367.68285018643	1862.84076012621	2471.24176340742	5970.14708940118	5992.72869006741	3752.22901412856	4734.82216002566	6688.84537150166	1956.31320156088	6430.94645640432	3578.87733385181	2714.10092647987	5210.70491072973	3181.77847549849	6468.45289693369	4408.65284426416	3268.60484485418	7482.67950280639	5755.52662726349	787.811454927194	3426.94207115951	5473.20369287281	2141.76715843311	2264.42879766557	1836.90739058043	2725.48774098581
ENSG00000048991.16	281.710594882111	214.331805700042	313.716404946648	373.430638441998	237.237524509383	445.076800762144	244.440008377769	384.934608727034	410.146496244401	187.263192001197	361.346627239664	153.16246219041	190.789036694006	115.085655776882	361.230915069388	140.239977810463	394.349622809796	299.145543668667	436.98928992038	279.172765527544	241.735983990378	461.960697184614	449.570448286168	497.65929848411	211.593834419682	219.917224837054	581.13300791917	620.975659155531	460.678072147458	379.799026025814	730.436509265766	238.744498162736	840.42231585291	495.540301096816	268.125667312998	584.046092588733	404.399073387652	703.231389991868	576.668199996882	427.185477551419	779.676681840162	740.502828194556	124.653324620085	436.399457976949	743.429029554966	283.309876443589	264.521301242707	241.496112754555	351.206834396225
ENSG00000049089.15	312	180	140	229	259	345	159	265	426	105	288	111	148	896	176	117	300	275	211	143	128	721	343	315	125	277	479	345	406	368	357	172	476	300	188	325	307	358	390	396	574	447	83	467	561	217	217	119	161
ENSG00000049130.16	3	4	3	1	0	2	1	0	0	0	2	0	0	0	0	0	1	2	5	1	0	0	0	1	4	5	4	3	2	0	6	1	0	0	0	1	1	3	2	0	2	6	0	0	2	0	0	0	0
ENSG00000049167.14	51.7880424076216	21.0736024970323	25.2201823148335	48.4343199118578	62.0013506439381	69.7834438025505	24.3966338366363	57.7518176051191	80.5455017812169	21.124532249248	39.2645259507386	24	14.1899764685677	30.538093082019	74.1951284691044	15.751711887613	87.9252223290024	29.7808037653846	107.279563623838	26.0762572416514	55.1614982945401	80.7575812855816	80.2526336692294	48.5783109661809	31.2220988880876	44.3836562564065	101.340733624906	91.0461714186802	86.2670869456254	87.2798032652186	107.618229130982	38.4471809312988	145.518659202629	107.001841111958	39.0039444039532	110.649479195709	60.3751047579349	103.489294850781	183.414550388189	47.9027235553011	139.583592373506	110.598241716432	38.4386240239883	63.0775032684021	89.2476349570457	20.2845917746537	33.7554314407937	22	25
ENSG00000049192.15	18	5	13	5	19	20	6	29	13	2	7	4	3	7	15	2	17	16	16	12	10	80	21	14	9	7	48	43	21	10	32	6	29	32	18	25	19	25	32	3	26	39	8	22	28	22	23	7	28
ENSG00000049239.12	1147.2333937023	896.327465860062	1207.17976855512	1660.51704089082	2095.10031969758	2032.64324903986	1245.14862155189	1431.76081488182	2008.7712882567	1055.65114190647	1788.09601136833	582.474855499949	684.534294681682	789.408179629318	1455.59662881871	647.351877058147	1496.01356840124	1110.60388489931	1448.22422414672	1011.69841244781	1246.02933591126	1464.94062564895	1762.78631421378	1526.0467587541	724.868278486452	987.186519996299	3271.68827667662	2709.52195973719	1679.57943699948	1791.85297026325	2896.32928074302	1232.80645483317	2447.60718513812	1826.73117098495	1052.95384717386	1959.83114916576	1381.11817560695	2172.18595791962	2055.26970109642	1471.66852063813	2543.97667756833	2163.04018974483	671.223584014672	2138.62737596489	2697.86233111839	1105.96254460909	1010.10928438253	957.35874644396	1143.89567257719
ENSG00000049245.13	1393.94865718894	857	1223	1614.12991123348	1937	2157	1197	1397.00323879882	2099.14406328877	804.281968603782	2058.27552309023	446	1106.28049981989	861.533191617365	1382	742	2089.13197654719	1165.75140067791	1915.23707145582	1015	1600.16260163432	1742.17237705513	1447.9045769289	1401.16718613189	885.160362055999	1033.25537164415	2597.92490851732	2406.40737234931	1529	1736.88122981323	2449.22624997386	944.654867814839	2197.01891806108	1517	1274.91031363242	2062.98792565796	1353.85687804013	3300.96365648458	1907.71169677518	1703.02413849549	2203.20670765191	2471.76714241939	407.040739246594	1232	2241.9918417808	1019.10862437654	997	828	878
ENSG00000049246.14	35.58028931823	46.0601277510331	36.5340658529963	97.6951280248885	108.412151461799	148.549617412083	18.305674826183	106.365487689564	97.1680060758259	45.7557878969479	59.0066998963681	46	35.1782162422117	23.2650904046033	83.0920369616253	23	64.9998269001464	56.7921993271589	158.168639857147	73	24.0532271123854	25.6207298155942	71.4519426010175	67.2003828686474	34	36.9397299772778	135.848352312777	93.7571999338848	105.719136716465	73	141.250919819604	54	215.266313689331	170.517616258728	41.5097224884161	184.193003791831	109.767247959063	91.3122793580822	187.640516084522	78.1540320632073	199.61325370153	148	40	123.319665942195	200.472319634033	49	30.5599332363098	31.4228595828581	47.6931922520666
ENSG00000049247.13	0	1.93987224896692	8.46593414700373	3.20268059055915	2.5878485382014	11.4503825879171	6.69432517381699	8.63451231043636	2.401638304214	5.24421210305208	3	0	10.8217837577883	2.73490959539674	9.28340387508391	1	8.00017309985361	6.20780067284111	6.26154499066947	2	0.0227319129790894	6.37927018440577	7.75263822430369	9.50382780033234	1	5.65783328949067	6	20.3689269196692	28.9133739623735	6	9.40848653543239	2	6.15326197096207	26.3754601314379	11.6889822074935	19.6031638610519	29.1410370270674	10.3835932810623	32.3594839154778	5.49927283690508	12.3867462984704	3	0	0	11.3913305151209	0	3.44006676369018	9.5771404171419	8.30680774793346
ENSG00000049249.8	228.121592217673	120.905796361523	151.280212246734	335.118968016865	339.825676040784	315.783659414267	511.094170631699	172.844079788943	441.725809528595	120.736851916042	445.576593306881	39.7180878349828	255.034813802319	161.467109630357	188.037575998034	107.076952574383	320.228359024844	257.144095161053	245.640736257316	177.65027543692	272.418367780093	431.216428913562	479.912747204667	246.131872249706	92.6201573767905	318.750736372227	614.754265090473	565.666787437988	322.03127596612	265.768643905309	296.976335315686	200.175814524369	402.214208520944	134.704456147672	221.336792323239	207.591114745685	150.196774587667	440.141203479894	319.505358078576	271.57666214015	480.619838373468	481.225315090356	88.6003096474646	218.563446773773	354.766262005674	161.625742936673	249.567144750116	161.487779666607	132.972920468505
ENSG00000049283.18	6	2	3	2	2	2	1	2	1	2	0	0	2	2	8	0	0	0	0	1	1	0	8	1	0	0	2	5	14	2	5	2	5	1	4	5	3	3	1	3	9	10.1475238844697	0	2	0	1	0	0	0
ENSG00000049323.16	60.3392809353471	30	54.7864533036173	83.7344403174956	103	61.5040856904252	60	92.9623235693623	41	85.5299186642324	84	32.9049195356558	43.5539347976248	85.6486086872319	29	53	46	16	76	56.4767522281586	61.6976735077456	52.7279295118701	26	67.7395970450627	53.4619165967836	25.0219827781971	81.7143954917799	37	114.777231098866	49	93.6466309825955	90.7286787188232	66.4303370337579	76	46	49.0708587832871	67	38.02172200383	21	68.6736040598617	75	92	65	71.6791406159965	74.7959141597076	40	14	26	90
ENSG00000049449.9	186.435804840869	77.018972849362	92.2956430118412	128.768843168557	255.904364274177	265.81693535466	89.6602582568727	186.158427718704	333.856252823478	66.5540064544076	223.848477485112	107.928134804713	56.9896766847219	27.7741381368891	239.262413011596	68.8033304977266	177.925940788804	105.174166326157	262.944315449581	150.363581418932	120.161912663247	217.456935566427	172.780153994188	190.127019291183	92.0464520332431	148.275361983828	251.439149635875	351.959235806917	186.732288275714	245.694049548921	290.725078070868	108.223668936985	403.298986948812	340.684944668184	171.160335343813	433.029659027653	202.816252757282	519.65038004391	490.001272793364	202.500518898961	254.180689467916	402.174267340999	83.9277821599083	136.752038740417	298.209943602014	127.680773913955	196.805021918698	67.4002483506989	132.085256450672
ENSG00000049540.17	11.8276452824142	20.5018731404247	9.77266345940986	2.32363804438805	5.35575583898218	13.2922557887286	12.5169798668523	8.69209701059086	14.7448642399838	4	7.27785893590193	1	22.2761095891477	35.2537207146278	12.4061473277137	5.26684949943756	2.09349058192292	4.08922091984311	7.58077396838092	7.79180211685442	19.6149136324689	8.10159474448229	20.0859621095931	8.73773281917155	4.56404151086516	9.09006291979583	14.1315699770339	8.50449635442095	24.3849516626847	8.12770984759272	8.11419534149293	19.2029413499581	16.5858098490132	1.04439450349841	8.63612891685799	10.2509625729371	6.46671455807573	17.7055695928561	12.3575596878235	30.5658604312815	7.03155227089649	149.135542469049	23.6791645408701	5.51953625559569	3.1464596717706	12.8518186411534	12.2261678364097	3.36208197028097	7.03481288943919
ENSG00000049541.11	331.305446769268	260.450506502419	330.864054534243	353.454318815927	509.324520581596	559.412092766125	331.972861548016	275.526339044705	591.90452407945	182.307001109049	479.216376041232	121.855529623691	385.767142804468	229.839693087925	429.055031479587	214.96066675028	429.332330728711	274.084092078567	334.194948707042	247.508360377473	343.057764874672	394.818759804896	408.259213118256	339.420886833146	260.022246549058	249.843520604662	678.564196845332	570.926764225502	476.291534478636	413.994347656138	628.779766577353	270.8428730492	669.758162931906	386.014038951831	355.237189552278	496.763150768799	343.174649830454	944.718733063727	553.038904863685	578.684707281556	628.340898950626	676.167691549132	179.142044522582	422.40685226197	566.885598199028	310.167034700561	271.67487847951	244.1909391905	266.988971270674
ENSG00000049618.23	871.381372593066	738.846503252419	860.812969005477	1168.76140632285	871.060085054765	1710.14764295582	699.207338861799	1361.3844220882	1291.27902944973	580.206493060544	1166.72743555564	399.899527493254	449.899310043075	477.905600958529	924.024872104693	416.72725201765	1331.31969687415	922.605554336721	1180.05453089516	989.915661524507	882.356681956254	1470.14129680052	1677.98407034426	1394.10601656327	622.175747763554	760.963672684274	1933.72334177131	2065.08854790926	1370.39053631458	1263.69042554178	2437.82151397809	794.253459778663	2847.60427705764	1445.996657778	804.99745522576	1756.10665333515	1208.30338810381	1609.23485250607	1466.27219741548	1354.06300468473	2663.96949576433	2208.2804274941	389.35836459586	1354.25592765277	2547.86725381436	673.700964937605	892.026746161123	723.29019886931	1191.94074293511
ENSG00000049656.14	1136	656	984	1156	1373	1539	947	1208	1586	692	1289	572	741	358	1384	589	1371	958	1365	822	812	1393	1404	1373	680	875	2146	2169	1536	1401	2173	813	2286	1585	1032	1913	1311	1987	1783	1661	2057	2051	557	1332	2246	1017	832	630	1160
ENSG00000049759.18	248.380358098518	164.392307826669	253.8678560973	270.993941502048	463.250864932861	357.513450261856	289.036004857527	280.596934004793	317.011442219485	244.113338704549	298.77112636969	208.312790092554	264.021248646109	162.945990179346	368.136559031544	366.584168480087	380.955653120758	227.517660452363	290.581098887905	318.605345481538	197.055066563607	387.963359438251	361.326384266246	279.13280822534	230.38946831656	403.844069086637	574.394210180359	479.262141332103	400.862093932781	342.529474080278	541.100954812021	319.295062188891	391.199234689247	522.413817106456	430.913488340073	594.145909395633	472.286806569957	397.499004780974	456.574235039964	399.857822402846	208.210456284782	425.872485955503	319.913158346587	310.386990569543	505.374095534069	291.958610929314	244.30066304465	203.014096034801	296.02102301723
ENSG00000049768.15	165.030242579201	196	83.2303037508318	188.16718097742	144.441348206658	144.212064097416	151.848462492165	137.719319839467	124.687868286472	90.4590817731073	60.6969760158539	71.2519544929211	110.803161524526	31.6519097920255	170.03542544545	117.331792110225	143.23835610192	143.148895788879	155.596466395663	121.823977207263	72.6879429268755	181.953341303859	169.605500923482	222.255667445646	84.2362676962869	72.688473667031	203.967666897852	279.553035923429	135.811003929378	97.3841038417035	400.53349095924	122.02032894291	268.506521172788	202.420956382204	96.5446405105019	150.117872661179	155.997213151045	166.29735216519	237.630197479905	253.559631892165	265.65506833965	174.981856361499	97.4609516282847	121.00002204084	410.703274964275	138.121696691336	140.197260691848	195	155.785518427839
ENSG00000049769.14	187.523242920644	62.5223414742381	118.556357382538	150.071138589363	152.194811376433	229.547381960922	92.2813190344567	136.152141507765	164.897920521254	36.3873445388278	115.063222377035	57.6032245352119	102.502447482918	27.5613155426064	158.74360438653	57.0800904640183	152.107537372671	116.411608094765	110.207297868668	82.4033884258165	84.5668098379779	124.434083774352	165.662670764384	164.618711460436	91.8542883744494	77.738671188804	270.414136761395	332.374450796744	162.541627302014	132.251627078918	281.906332744742	64.7798083185171	277.458874117503	151.531348827834	172.192707159013	272.3640754476	114.365983123349	143.642201222264	355.632536453109	228.966014822021	340.629499533026	231.547467890112	68.4498521450798	154.018633731859	293.108389925529	46.8783033086636	71.9180116348542	77.6236841843137	151.865876807891
ENSG00000049860.14	1655.42162200134	792.557887931175	1054.90916993092	1492.18280157566	1921	1792.89582126334	1084.07324646005	1009.3616412952	1744.83140273607	592.384376792948	2116.53587681375	442.670922551199	1020	540.233980479231	1401.53935923102	699.101696002905	1703.51726120925	945	1912.21142420218	879	1327	1479.76326109078	1625.76538714033	1233.16667341015	709	998.96142472287	2419.2837868846	2446.76964235697	1455.33379892277	1568.12284301916	2412.13445936795	894	2297.65378982345	1782.62155234312	1222.96118246447	1968.6973603728	1237.14535906875	3583.48603405961	2269.14442419928	1486	2034.99440787083	1817.85839058679	376	1218.43730598091	2059.94568251185	1167	884.121172363805	669	832
ENSG00000049883.15	136.719860463276	99.1559221597256	116.065568280413	129.608880142942	205.264620578223	253.243850526106	103.804651670549	167.313476309747	250.12814349266	57.2805143630742	116.610017255183	61.6350474256394	51.9815521665472	62.2539933317835	177.991239078937	46.299876651261	248.173447346112	95.8821998190682	217.328648361977	82.1349052474747	75.4834134973082	131.569381511423	173.964658358557	123.552850514954	70.1115637369956	119.903546584113	258.763924204082	290.034510121337	238.086000367649	198.847825792948	223.456385679405	91.7531937331949	369.57607071024	229.173303188208	154.268679813208	254.900920252791	167.564796344194	237.146083343191	408.37176294395	99.3031567572942	381.777988846354	313.495344016188	63.6840541321685	144.067782512044	238.514058885739	58.6744460854388	125.156444414277	41.106616939155	121.174223970278
ENSG00000050030.15	10	11	16	13	6.00645469237717	27	5	7	10	1	7	4	5	9.03469009142718	8	4	21	8.01091082531387	26	5	5	9	21.0162120206248	6	7	1	17.00928920291	16	26	15	12	1	23.0135680614202	29.1780559315764	12.0146623843012	1	13	15	25.0185738369475	15	54	18.0711622338112	0	7.00631892221817	16	10	5.00484186429928	0	13
ENSG00000050130.18	540.796961741437	250.146682994696	382.584813195844	373.248362540166	640.490704564824	720.226250024505	302.791530072857	387.086674042604	664.913940141308	201	616.025974451269	132.104461824656	232.12947614967	196.546264363039	428.403654288918	175.657094808515	767.592595968048	418.210856345435	665.904021569438	238.290359719066	438.134023491281	502.107001431918	448.84456159095	334.073239809093	217.03006130743	402.251061386957	1021.55906623383	1011.05980392837	702.258579351467	527.210693120065	747.100866080012	212.592947423168	745.338605415027	602	481.694996847049	767.464726851516	427.863986874767	1096.92448501045	870.267373581678	434.52502741101	814.318584196008	683.148726645685	152.173936284883	359.836414383861	595.690280564564	252.489717942337	315.180716338552	180	291.371097574626
ENSG00000050165.18	8	12	11.3371085055741	10	34	19	7	10.6775119610134	6	10	18.3240257363993	11	4	2.22480698575261	22	5	25	21	14	16	20	6	19	2	5	4	11	14	12	30	15	5	49.3979442022304	26.3109433116617	30	17	9	20	32	18	34	21.1223851281434	7	38	28	14	0	11	24
ENSG00000050327.15	61.8453156963529	33.404437501914	51.4464574245935	58.506014442574	81.6062544154927	84.3124390974983	65.8464946787648	116.624776534033	96.1694516178031	62.3768955099441	52.2752034929063	51.9409698527463	41.3088596010715	24.6016378918746	108.646735991675	37.7560733561339	98.3973513626106	71.5009499702128	66.8159308573709	30.0214935528008	20.5058877648297	106.407546275282	129.975202965723	75.6210503820037	23.594341070328	32.6111719764218	146.624669794891	213.761945100799	103.646369544968	94.7402948761763	187.4699023789	52.4309962367486	248.30329035443	73.7740929552232	56.5304346252416	132.56886354178	121.264513661399	128.283670989444	103.29463264353	79.969664159544	142.717328112528	166.039195110484	33.9109444168514	81.8645899043536	149.60298182549	42.3143760524774	39.5497865130305	55.534269675511	130.984889941609
ENSG00000050344.9	257.348994479306	132.232032894028	198.072393836962	190.631111977962	424.599117926972	258.638168968339	139.805461208824	317.230873750563	333.523305545826	87.8306706779192	246.401383671172	66.9400482530476	96.8837693486969	78.6814482173325	242.126016288264	98.1621792758689	310.530769143231	230.563840083985	255.051634614913	167.553719903906	193.845307637261	381.310595583545	332.874979191798	176.506102518248	126.726682519184	152	449.944208098805	490.585173682174	277.456199604977	326.016965091923	427.741122544866	130	546.525517776997	303.334603455819	196.478844891695	424.357249849605	221.639207655579	361.184519535476	693.838683633937	271.812891706045	452.634192357618	454.874930778597	67	233.783610451039	317.34413295116	94	227.485826283286	138	246
[truncated: 59,931 more rows]
[truncated: 19 more columns]
