# Supplementary material for: Molecular Profiling of Axial Spondyloarthritis Patients Reveals an Association between Innate and Adaptive Cell Populations and Therapeutic Response to Tumor Necrosis Factor Inhibitors
Source: Biomolecules. 2024 Mar 21;14(3):382. doi: 10.3390/biom14030382 (PMC10967957; doi:10.3390/biom14030382)
Supplement: Supplementary file 1 [file biomolecules-14-00382-s001.zip › SuppTable12.xlsx]

## Sheet: Supp. Table 12
Supp. Table 12. List of proteins and their spectral counts.
MS data file	\\sauval\Data_MS\Univ Lisboa ITQB\MS19-036\2019-10-01
Database :	SwissProt 2019_07 (560,537 sequences; 201,466,755 residues)
Taxonomy :	Homo sapiens (human) (20,432 sequences)
Enzyme :	Trypsin - Max missed cleavages: 2
Fixed modifications :	Carbamidomethyl (C)											Spectral counts without normalization			Spectral counts without normalization			Spectral counts without normalization			Spectral counts without normalization			Spectral counts without normalization			Spectral counts without normalization			Spectral counts without normalization			Spectral counts without normalization			Spectral counts without normalization			Spectral counts without normalization			Spectral counts without normalization			Spectral counts without normalization			Spectral counts without normalization
Variable modifications :	Deamidated (NQ), Oxidation (M)										Sample:	T2_NR17	T3_R11	T4_R18	T3_R7	T2_R1	T1(Baseline)_NR17	T3_R8	T1(Baseline)_R5	T1(Baseline)_NR1	T1(Baseline)_R9	T3_R3	T3_R2	T4_NR18	T3_NR2	T1(Baseline)_NR9	T1(Baseline)_R3	T2_NR13	T1(Baseline)_NR2	T4_R17	T2_R14	T1(Baseline)_NR14	T1(Baseline)_R11	T4_R7	T1(Baseline)_R6	T4_NR17	T2_R3	T3_R17	T1(Baseline)_NR11	T1(Baseline)_R13	T4_NR16	T3_R18	T4_NR15	T2_NR12	T2_R15	T1(Baseline)_R2	T2_NR6	T1(Baseline)_NR13	T2_NR10
MS/ MS² mass tol. :	± 5.0 ppm / ± 0.02 Da										Injection random order:	1	2	3	4	5	6	7	8	9	10	11	12	13	14	15	16	17	18	19	20	21	22	23	24	25	26	27	28	29	30	31	32	33	34	35	36	37	38
Instrument type :	ESI Q-Exactive HF (frag. a, b (*,0), y (*,0), immonium et frag. interne yb<700)										Tube number:	52	62	103	58	26	25	59	5	12	7	55	54	117	71	19	3	49	13	102	38	23	8	92	6	116	28	68	21	10	115	69	114	48	39	2	44	22	47
Peptide validation:	Peptides whose score ≥ query identity threshold (p<0.05) and rank ≤ 1 are marked as significant.										Protein level:	A	A	A	A	A	A	A	A	A	A	A	A	A	A	A	A	A	A	A	A	A	B	B	B	B	B	B	B	B	B	B	B	B	B	B	B	B	B
Spectral count:	Only with non-ambiguous peptides							Mean total SC:	11791.5		Total spectral counts	7340	5325	7979	5921	10756	3613	7708	10541	10826	2374	6478	8966	9892	6346	10331	11676	9540	10707	6624	8922	8638	12980	10426	12689	11006	12305	12655	11213	12263	10723	10841	11858	12978	12152	12635	10483	11709	9684
											Deviation from mean	0.377516	0.548402	0.323324	0.497857	0.0878145	0.693592	0.346307	0.106048	0.081878	0.798668	0.450619	0.239619	0.161088	0.461814	0.123858	0.00979196	0.19094	0.0919701	0.438238	0.243351	0.267436	-0.100797	0.115801	-0.0761177	0.0666127	-0.0435517	-0.0732342	0.0490577	-0.0399898	0.0906132	0.0806059	-0.00564294	-0.100627	-0.0305762	-0.0715381	0.110967	0.00699333	0.178728
				Best hit in terms of i) #peptides, and ii) MASCOT score
Protein accession	Protein description	pI	MW (Da)	dat	Sample	Protein Mascot score	coverage (%)	#peptides	#non-ambiguous peptides	#peptides total	Total SC	Q25465_MS19-036_T2_NR17	Q25466_MS19-036_T3_R11	Q25467_MS19-036_T4_R18	Q25468_MS19-036_T3_R7	Q25469_MS19-036_T2_R1	Q25470_MS19-036_T1(Baseline)_NR17	Q25471_MS19-036_T3_R8	Q25472_MS19-036_T1(Baseline)_R5	Q25473_MS19-036_T1(Baseline)_NR1	Q25474_MS19-036_T1(Baseline)_R9	Q25475_MS19-036_T3_R3	Q25476_MS19-036_T3_R2	Q25477_MS19-036_T4_NR18	Q25478_MS19-036_T3_NR2	Q25479_MS19-036_T1(Baseline)_NR9	Q25480_MS19-036_T1(Baseline)_R3	Q25481_MS19-036_T2_NR13	Q25482_MS19-036_T1(Baseline)_NR2	Q25483_MS19-036_T4_R17	Q25484_MS19-036_T2_R14	Q25485_MS19-036_T1(Baseline)_NR14	Q25487_MS19-036_T1(Baseline)_R11	Q25488_MS19-036_T4_R7	Q25489_MS19-036_T1(Baseline)_R6	Q25490_MS19-036_T4_NR17	Q25491_MS19-036_T2_R3	Q25492_MS19-036_T3_R17	Q25493_MS19-036_T1(Baseline)_NR11	Q25494_MS19-036_T1(Baseline)_R13	Q25495_MS19-036_T4_NR16	Q25496_MS19-036_T3_R18	Q25497_MS19-036_T4_NR15	Q25498_MS19-036_T2_NR12	Q25499_MS19-036_T2_R15	Q25500_MS19-036_T1(Baseline)_R2	Q25501_MS19-036_T2_NR6	Q25502_MS19-036_T1(Baseline)_NR13	Q25503_MS19-036_T2_NR10
APOB_HUMAN	sp|P04114|APOB_HUMAN Apolipoprotein B-100 OS=Homo sapiens OX=9606 GN=APOB PE=1 SV=2	6.58404	515283	F215812.dat	Q25500_MS19-036_T1(Baseline)_R2	17638	66.6	285	285	437	73836	402	360	380	464	534	138	440	527	732	108	231	537	442	571	544	466	524	774	245	754	685	593	440	782	510	473	1094	452	767	763	1021	696	865	755	1076	517	891	465
CO3_HUMAN	sp|P01024|CO3_HUMAN Complement C3 OS=Homo sapiens OX=9606 GN=C3 PE=1 SV=2	6.01521	187030	F215762.dat	Q25492_MS19-036_T3_R17	9030	84.2	140	140	204	87193	559	389	401	398	669	292	520	685	830	249	469	654	617	491	704	717	610	709	501	589	585	912	542	800	853	885	1026	681	752	670	776	823	842	842	766	692	723	670
A2MG_HUMAN	sp|P01023|A2MG_HUMAN Alpha-2-macroglobulin OS=Homo sapiens OX=9606 GN=A2M PE=1 SV=3	6.02768	163188	F215904.dat	Q25560_MS19-036_T2_R8	6413	76.1	102	97	137	58398	238	314	413	389	436	151	588	438	345	132	276	339	465	417	365	399	385	485	259	472	546	577	356	565	352	546	500	595	418	578	650	477	440	644	469	653	511	375
FINC_HUMAN	sp|P02751|FINC_HUMAN Fibronectin OS=Homo sapiens OX=9606 GN=FN1 PE=1 SV=4	5.46355	262460	F215823.dat	Q25509_MS19-036_T2_R2	6190	55.4	96	96	114	22205	114	42	169	125	308	109	88	79	193	15	56	228	140	52	115	129	175	296	113	212	133	155	183	216	199	94	223	272	248	87	81	284	192	176	102	190	355	218
CFAH_HUMAN	sp|P08603|CFAH_HUMAN Complement factor H OS=Homo sapiens OX=9606 GN=CFH PE=1 SV=4	6.21262	139005	F215673.dat	Q25472_MS19-036_T1(Baseline)_R5	6558	71.6	96	89	112	71718	326	231	336	284	590	149	334	811	608	98	301	345	589	285	615	669	436	559	322	641	540	784	455	678	617	729	692	609	674	484	584	704	840	650	707	547	595	557
CO5_HUMAN	sp|P01031|CO5_HUMAN Complement C5 OS=Homo sapiens OX=9606 GN=C5 PE=1 SV=4	6.10701	188186	F215842.dat	Q25528_MS19-036_T1(Baseline)_R4	5269	54.7	83	83	114	27942	172	111	122	111	206	43	167	222	217	27	162	163	213	129	262	277	181	249	115	223	195	303	170	286	261	296	277	221	231	229	250	327	289	279	224	256	243	196
CERU_HUMAN	sp|P00450|CERU_HUMAN Ceruloplasmin OS=Homo sapiens OX=9606 GN=CP PE=1 SV=1	5.43851	122128	F215842.dat	Q25528_MS19-036_T1(Baseline)_R4	5928	80.7	78	78	89	62383	243	189	300	248	552	120	347	538	619	93	293	333	412	254	243	662	449	488	222	454	462	647	344	901	452	689	498	477	601	432	556	389	615	832	536	524	622	448
TRFE_HUMAN	sp|P02787|TRFE_HUMAN Serotransferrin OS=Homo sapiens OX=9606 GN=TF PE=1 SV=3	6.81089	77014	F215982.dat	Q25582_MS19-036_T2_NR8	4044	75.6	67	67	77	8914	35	18	28	29	111	13	33	38	67	0	30	36	91	20	48	77	51	70	41	43	12	40	35	169	80	64	172	99	64	28	13	65	107	147	98	60	68	75
PLMN_HUMAN	sp|P00747|PLMN_HUMAN Plasminogen OS=Homo sapiens OX=9606 GN=PLG PE=1 SV=2	7.03581	90510	F215850.dat	Q25536_MS19-036_T3_R15	3889	71.4	64	64	91	36658	210	127	137	135	288	75	238	352	359	55	170	277	291	170	290	325	250	279	113	251	233	332	232	425	362	319	357	399	317	337	263	351	363	440	439	267	336	264
PZP_HUMAN	sp|P20742|PZP_HUMAN Pregnancy zone protein OS=Homo sapiens OX=9606 GN=PZP PE=1 SV=4	5.96925	163760	F215973.dat	Q25577_MS19-036_T4_R15	4389	57.4	68	63	82	7252	43	8	1	1	80	17	7	2	62	9	45	1	20	1	5	82	40	4	2	24	73	22	1	337	49	91	8	1	56	3	4	26	37	433	5	26	65	31
CFAB_HUMAN	sp|P00751|CFAB_HUMAN Complement factor B OS=Homo sapiens OX=9606 GN=CFB PE=1 SV=2	6.66731	85479	F215936.dat	Q25571_MS19-036_T1(Baseline)_NR5	4013	65.6	61	61	74	31000	146	79	111	113	271	75	134	255	303	51	185	206	176	114	301	361	213	238	118	184	220	312	186	308	256	382	278	215	306	198	220	340	346	271	317	238	252	217
ITIH4_HUMAN	sp|Q14624|ITIH4_HUMAN Inter-alpha-trypsin inhibitor heavy chain H4 OS=Homo sapiens OX=9606 GN=ITIH4 PE=1 SV=4	6.51278	103293	F215878.dat	Q25548_MS19-036_T4_NR9	3652	61.4	56	56	69	36165	142	122	211	142	259	81	183	318	263	60	150	179	203	158	283	306	246	251	191	227	265	357	273	343	259	393	249	277	348	253	247	255	385	297	233	291	331	218
AFAM_HUMAN	sp|P43652|AFAM_HUMAN Afamin OS=Homo sapiens OX=9606 GN=AFM PE=1 SV=1	5.6421	69024	F215885.dat	Q25550_MS19-036_T3_NR4	3179	72.3	54	54	62	20752	137	63	112	75	171	53	85	134	158	27	87	144	165	74	157	129	132	131	107	131	106	181	202	154	165	144	213	155	163	131	129	108	183	110	243	142	145	157
APOA1_HUMAN	sp|P02647|APOA1_HUMAN Apolipoprotein A-I OS=Homo sapiens OX=9606 GN=APOA1 PE=1 SV=1	5.55551	30759	F215978.dat	Q25580_MS19-036_T4_R16	3282	87.3	54	54	59	34343	91	77	445	177	152	78	107	125	132	48	96	165	139	82	112	133	169	159	228	118	103	297	407	199	144	187	160	182	227	145	191	137	159	245	181	208	186	141
VTDB_HUMAN	sp|P02774|VTDB_HUMAN Vitamin D-binding protein OS=Homo sapiens OX=9606 GN=GC PE=1 SV=2	5.31935	52883	F215906.dat	Q25561_MS19-036_T4_NR2	3769	84	53	53	70	58932	323	255	316	204	420	142	362	413	540	151	359	486	468	271	602	505	395	416	284	325	339	564	446	595	527	508	552	540	571	524	445	513	479	515	557	448	398	452
ITIH2_HUMAN	sp|P19823|ITIH2_HUMAN Inter-alpha-trypsin inhibitor heavy chain H2 OS=Homo sapiens OX=9606 GN=ITIH2 PE=1 SV=2	6.39598	106397	F215922.dat	Q25565_MS19-036_T3_NR10	3526	59.5	53	53	58	38635	191	183	212	174	289	105	230	301	291	49	174	227	271	207	298	274	268	325	143	300	269	397	306	374	319	302	374	380	309	385	352	316	378	331	356	358	402	303
APOA4_HUMAN	sp|P06727|APOA4_HUMAN Apolipoprotein A-IV OS=Homo sapiens OX=9606 GN=APOA4 PE=1 SV=3	5.28219	45371	F215895.dat	Q25553_MS19-036_T3_NR16	2910	77.3	50	50	56	11647	44	33	119	46	69	15	57	49	65	11	50	77	57	42	56	54	80	48	64	39	48	93	114	57	56	88	76	71	115	68	61	49	86	79	51	74	64	57
VWF_HUMAN	sp|P04275|VWF_HUMAN von Willebrand factor OS=Homo sapiens OX=9606 GN=VWF PE=1 SV=4	5.28745	309058	F215947.dat	Q25572_MS19-036_T4_R10	2335	22.1	48	48	73	2175	11	5	7	3	19	4	6	12	12	1	6	6	10	3	9	18	14	24	6	26	6	24	9	18	15	14	10	19	27	8	9	20	59	31	13	23	46	14
TSP1_HUMAN	sp|P07996|TSP1_HUMAN Thrombospondin-1 OS=Homo sapiens OX=9606 GN=THBS1 PE=1 SV=2	4.71377	129300	F215829.dat	Q25515_MS19-036_T2_R16	2649	44	46	46	58	6955	39	34	62	49	55	10	48	83	52	5	21	45	45	33	61	57	35	69	26	50	34	59	58	56	36	41	73	54	64	88	80	76	59	88	40	57	84	27
CO6_HUMAN	sp|P13671|CO6_HUMAN Complement component C6 OS=Homo sapiens OX=9606 GN=C6 PE=1 SV=3	6.38923	104718	F215936.dat	Q25571_MS19-036_T1(Baseline)_NR5	2686	53.2	45	45	57	10142	38	25	36	26	89	13	45	108	73	6	35	52	61	33	76	97	73	79	26	79	71	120	53	92	93	105	102	103	101	85	81	111	105	77	88	85	107	43
ALBU_HUMAN	sp|P02768|ALBU_HUMAN Serum albumin OS=Homo sapiens OX=9606 GN=ALB PE=1 SV=2	5.91701	69321	F215685.dat	Q25477_MS19-036_T4_NR18	2917	75.7	45	45	50	1649	4	10	7	3	7	10	3	5	7	2	7	14	227	9	14	8	3	9	3	20	4	5	8	12	10	6	13	12	12	11	5	38	7	7	7	8	12	13
CO7_HUMAN	sp|P10643|CO7_HUMAN Complement component C7 OS=Homo sapiens OX=9606 GN=C7 PE=1 SV=2	6.09428	93457	F215868.dat	Q25541_MS19-036_T1(Baseline)_NR3	2909	61.6	44	44	56	10740	65	45	43	41	95	16	69	64	83	8	53	77	96	51	82	110	81	88	31	56	85	122	75	84	105	119	113	109	62	80	86	105	115	76	102	74	111	81
K2C1_HUMAN	sp|P04264|K2C1_HUMAN Keratin, type II cytoskeletal 1 OS=Homo sapiens OX=9606 GN=KRT1 PE=1 SV=6	8.15062	65999	F215838.dat	Q25524_MS19-036_T4_R3	3341	62.4	47	42	59	10225	110	97	77	100	57	172	71	94	68	115	105	150	150	96	51	217	143	164	82	55	101	63	121	79	115	74	100	72	71	68	69	143	81	110	115	61	58	86
GELS_HUMAN	sp|P06396|GELS_HUMAN Gelsolin OS=Homo sapiens OX=9606 GN=GSN PE=1 SV=1	5.89641	85644	F215978.dat	Q25580_MS19-036_T4_R16	2580	69.3	42	42	50	13729	86	72	86	58	113	31	100	116	106	16	74	110	109	86	104	97	128	111	62	94	105	130	97	93	108	106	124	141	107	128	148	93	128	110	133	114	128	104
HEMO_HUMAN	sp|P02790|HEMO_HUMAN Hemopexin OS=Homo sapiens OX=9606 GN=HPX PE=1 SV=2	6.54733	51643	F215924.dat	Q25567_MS19-036_T4_R14	2720	81.2	42	42	43	67215	405	285	428	267	525	156	416	591	460	128	392	414	466	302	623	675	495	484	520	527	356	710	616	649	617	644	678	706	621	535	510	518	537	370	582	441	517	609
ANT3_HUMAN	sp|P01008|ANT3_HUMAN Antithrombin-III OS=Homo sapiens OX=9606 GN=SERPINC1 PE=1 SV=1	6.32104	52569	F215906.dat	Q25561_MS19-036_T4_NR2	2679	72.6	41	41	47	23130	94	73	156	93	180	50	113	169	113	24	109	149	128	87	174	176	143	168	115	101	105	222	234	126	152	177	127	214	221	156	115	129	205	92	224	155	174	156
ITIH1_HUMAN	sp|P19827|ITIH1_HUMAN Inter-alpha-trypsin inhibitor heavy chain H1 OS=Homo sapiens OX=9606 GN=ITIH1 PE=1 SV=3	6.30795	101326	F215881.dat	Q25549_MS19-036_T4_NR4	2926	49.5	40	40	47	27635	161	149	167	141	195	101	182	203	218	59	133	166	192	158	230	202	191	229	125	204	186	285	225	229	225	207	215	258	227	240	218	215	283	220	218	258	276	207
KNG1_HUMAN	sp|P01042|KNG1_HUMAN Kininogen-1 OS=Homo sapiens OX=9606 GN=KNG1 PE=1 SV=2	6.3352	71912	F215878.dat	Q25548_MS19-036_T4_NR9	2738	52.2	40	40	46	18886	79	65	103	75	159	40	73	129	135	26	68	121	136	59	140	136	108	100	95	79	92	159	183	137	123	143	135	139	185	124	86	149	177	156	198	128	130	102
THRB_HUMAN	sp|P00734|THRB_HUMAN Prothrombin OS=Homo sapiens OX=9606 GN=F2 PE=1 SV=2	5.63684	69992	F215878.dat	Q25548_MS19-036_T4_NR9	2849	59.3	39	39	48	16579	75	43	115	49	101	23	94	110	106	13	47	92	87	50	132	106	82	100	85	80	76	127	149	119	119	130	147	131	115	146	134	134	170	123	181	113	115	110
APOA_HUMAN	sp|P08519|APOA_HUMAN Apolipoprotein(a) OS=Homo sapiens OX=9606 GN=LPA PE=1 SV=1	5.57826	500995	F215977.dat	Q25579_MS19-036_T1(Baseline)_R12	2102	12.1	39	39	45	2541	71	5	8	8	15	30	8	1	42	3	1	3	0	1	10	3	14	10	0	20	1	25	4	27	54	0	9	1	7	13	9	100	5	96	1	10	19	1
C1R_HUMAN	sp|P00736|C1R_HUMAN Complement C1r subcomponent OS=Homo sapiens OX=9606 GN=C1R PE=1 SV=2	5.82469	80067	F215977.dat	Q25579_MS19-036_T1(Baseline)_R12	2251	63.8	40	39	44	11202	54	27	57	28	114	21	59	109	82	6	55	60	64	42	93	115	87	88	47	72	82	110	80	93	103	111	115	88	102	93	100	101	117	89	94	102	111	95
ITIH3_HUMAN	sp|Q06033|ITIH3_HUMAN Inter-alpha-trypsin inhibitor heavy chain H3 OS=Homo sapiens OX=9606 GN=ITIH3 PE=1 SV=2	5.49289	99787	F215808.dat	Q25497_MS19-036_T4_NR15	2245	52.2	39	39	42	8463	26	20	30	28	85	25	24	74	50	5	42	13	50	39	77	97	68	79	28	70	67	85	48	92	77	98	69	77	99	54	69	167	65	96	28	47	87	43
CO9_HUMAN	sp|P02748|CO9_HUMAN Complement component C9 OS=Homo sapiens OX=9606 GN=C9 PE=1 SV=2	5.4269	63133	F215757.dat	Q25487_MS19-036_T1(Baseline)_R11	2476	59.7	39	39	41	11931	54	38	62	38	120	21	32	123	92	13	78	33	70	35	116	151	98	94	53	87	87	156	49	132	124	164	91	88	126	83	101	121	128	102	62	97	106	76
KLKB1_HUMAN	sp|P03952|KLKB1_HUMAN Plasma kallikrein OS=Homo sapiens OX=9606 GN=KLKB1 PE=1 SV=1	8.60137	71323	F215956.dat	Q25573_MS19-036_T3_NR17	2312	64.7	36	36	47	10106	58	18	46	31	90	8	59	78	86	3	32	72	66	28	78	79	73	69	33	49	51	88	85	79	85	83	91	73	107	70	81	77	90	89	103	77	103	61
CO8B_HUMAN	sp|P07358|CO8B_HUMAN Complement component C8 beta chain OS=Homo sapiens OX=9606 GN=C8B PE=1 SV=3	8.49561	67003	F215850.dat	Q25536_MS19-036_T3_R15	2193	66.3	36	36	46	10388	58	47	41	41	79	19	71	94	80	17	57	71	97	51	98	104	89	89	35	58	58	100	62	101	95	106	97	75	111	94	96	102	112	104	81	77	93	77
K1C9_HUMAN	sp|P35527|K1C9_HUMAN Keratin, type I cytoskeletal 9 OS=Homo sapiens OX=9606 GN=KRT9 PE=1 SV=3	5.1362	62027	F215838.dat	Q25524_MS19-036_T4_R3	2865	69	36	36	45	6460	70	62	50	82	31	127	35	60	56	83	77	105	94	70	29	171	106	107	70	47	82	39	84	39	77	32	54	53	35	47	49	98	54	61	70	40	33	51
CFAI_HUMAN	sp|P05156|CFAI_HUMAN Complement factor I OS=Homo sapiens OX=9606 GN=CFI PE=1 SV=2	7.71996	65707	F215899.dat	Q25557_MS19-036_T3_NR15	2199	54.2	35	35	39	8844	53	21	41	26	68	14	33	60	84	6	40	44	56	22	98	98	53	51	46	35	40	71	66	67	87	98	83	51	76	57	52	77	81	44	57	63	52	68
K22E_HUMAN	sp|P35908|K22E_HUMAN Keratin, type II cytoskeletal 2 epidermal OS=Homo sapiens OX=9606 GN=KRT2 PE=1 SV=2	8.07353	65393	F215838.dat	Q25524_MS19-036_T4_R3	3474	72.1	50	34	67	3832	64	46	23	35	42	94	22	30	38	54	55	44	76	37	30	54	68	63	37	22	34	21	39	32	35	90	40	26	33	21	29	52	38	42	29	22	21	28
C1S_HUMAN	sp|P09871|C1S_HUMAN Complement C1s subcomponent OS=Homo sapiens OX=9606 GN=C1S PE=1 SV=1	4.857	76635	F215977.dat	Q25579_MS19-036_T1(Baseline)_R12	2083	50	34	33	47	9968	42	19	58	25	94	16	47	86	75	8	39	52	56	32	93	98	82	78	47	51	58	101	68	68	89	106	107	78	94	76	80	102	113	73	82	74	94	70
CO2_HUMAN	sp|P06681|CO2_HUMAN Complement C2 OS=Homo sapiens OX=9606 GN=C2 PE=1 SV=2	7.22571	83214	F215688.dat	Q25480_MS19-036_T1(Baseline)_R3	1930	50.9	33	33	41	5816	29	16	24	17	52	7	31	52	52	2	26	32	44	22	48	65	47	46	20	25	38	62	29	53	50	66	49	46	58	37	49	56	58	51	50	48	56	46
KRT82_HUMAN	sp|Q9NSB4|KRT82_HUMAN Keratin, type II cuticular Hb2 OS=Homo sapiens OX=9606 GN=KRT82 PE=3 SV=3	6.40022	56616	F215851.dat	Q25537_MS19-036_T3_R9	2326	69.4	39	33	40	571	4	4	2	4	4	5	4	2	3	3	4	4	6	5	2	7	4	14	2	2	3	2	2	5	4	2	5	2	4	2	4	7	4	4	6	2	1	2
K1C10_HUMAN	sp|P13645|K1C10_HUMAN Keratin, type I cytoskeletal 10 OS=Homo sapiens OX=9606 GN=KRT10 PE=1 SV=6	5.13431	58792	F215671.dat	Q25470_MS19-036_T1(Baseline)_NR17	2661	59.1	36	32	43	6246	94	87	59	73	59	145	59	57	52	77	78	86	110	73	56	85	105	103	63	39	68	30	63	50	65	55	60	58	54	37	44	72	55	59	83	41	46	47
IC1_HUMAN	sp|P05155|IC1_HUMAN Plasma protease C1 inhibitor OS=Homo sapiens OX=9606 GN=SERPING1 PE=1 SV=2	6.09112	55119	F215906.dat	Q25561_MS19-036_T4_NR2	2034	53.8	32	32	37	27269	121	161	139	115	203	74	175	277	162	38	134	181	200	149	269	232	211	244	98	170	206	292	188	199	200	230	209	236	266	190	190	149	283	154	307	197	257	181
HEP2_HUMAN	sp|P05546|HEP2_HUMAN Heparin cofactor 2 OS=Homo sapiens OX=9606 GN=SERPIND1 PE=1 SV=3	6.41111	57034	F215899.dat	Q25557_MS19-036_T3_NR15	1761	67.3	30	30	38	12547	54	45	68	47	108	23	68	87	121	23	57	82	52	51	109	114	61	100	70	63	70	117	66	138	81	150	125	81	87	111	105	101	116	142	127	108	80	92
C4BPA_HUMAN	sp|P04003|C4BPA_HUMAN C4b-binding protein alpha chain OS=Homo sapiens OX=9606 GN=C4BPA PE=1 SV=2	7.15113	66989	F215830.dat	Q25516_MS19-036_T1(Baseline)_NR7	1819	59.3	30	30	37	8171	56	35	34	14	79	10	35	89	46	7	33	45	58	23	74	84	46	63	15	38	36	81	54	75	87	93	72	44	83	51	29	91	105	41	102	65	57	62
APOE_HUMAN	sp|P02649|APOE_HUMAN Apolipoprotein E OS=Homo sapiens OX=9606 GN=APOE PE=1 SV=1	5.64558	36132	F215875.dat	Q25545_MS19-036_T3_NR13	1823	75.7	30	30	35	7980	35	20	64	24	44	14	34	52	44	7	25	80	41	25	43	38	50	28	67	42	28	82	88	41	52	52	80	65	57	57	55	72	79	40	70	63	59	43
F13B_HUMAN	sp|P05160|F13B_HUMAN Coagulation factor XIII B chain OS=Homo sapiens OX=9606 GN=F13B PE=1 SV=3	6.00585	75461	F215982.dat	Q25582_MS19-036_T2_NR8	1908	51	29	29	39	6861	46	23	28	24	43	6	37	62	51	1	21	48	66	24	56	55	40	42	24	47	28	60	56	58	61	58	67	55	56	71	61	65	73	55	75	60	66	49
HRG_HUMAN	sp|P04196|HRG_HUMAN Histidine-rich glycoprotein OS=Homo sapiens OX=9606 GN=HRG PE=1 SV=1	7.09413	59541	F215906.dat	Q25561_MS19-036_T4_NR2	1929	49.5	29	29	37	13184	117	62	71	53	123	37	98	84	91	28	94	94	85	94	109	123	119	97	34	109	94	117	88	86	134	128	80	132	102	189	128	190	119	109	120	108	135	111
AACT_HUMAN	sp|P01011|AACT_HUMAN Alpha-1-antichymotrypsin OS=Homo sapiens OX=9606 GN=SERPINA3 PE=1 SV=2	5.32779	47621	F215877.dat	Q25547_MS19-036_T3_NR12	2197	63.4	29	29	34	23526	79	60	143	93	199	59	118	187	162	46	126	122	119	69	175	237	153	147	116	114	126	229	178	199	117	297	127	164	246	129	132	128	224	137	170	178	166	122
CO8A_HUMAN	sp|P07357|CO8A_HUMAN Complement component C8 alpha chain OS=Homo sapiens OX=9606 GN=C8A PE=1 SV=2	6.07414	65121	F215875.dat	Q25545_MS19-036_T3_NR13	2030	56.5	28	28	39	8836	51	34	43	34	75	10	58	86	65	5	48	54	73	36	85	82	74	77	29	57	54	73	61	82	85	83	74	66	96	78	78	85	91	74	84	71	82	69
TRFL_HUMAN	sp|P02788|TRFL_HUMAN Lactotransferrin OS=Homo sapiens OX=9606 GN=LTF PE=1 SV=6	8.50358	78132	F215924.dat	Q25567_MS19-036_T4_R14	1388	45.1	28	28	33	418	1	0	1	0	4	1	2	3	2	0	0	0	0	0	0	1	0	6	2	9	0	0	0	17	0	2	6	0	5	6	1	5	2	10	0	1	1	7
IGHM_HUMAN	sp|P01871|IGHM_HUMAN Immunoglobulin heavy constant mu OS=Homo sapiens OX=9606 GN=IGHM PE=1 SV=4	6.34696	49409	F215906.dat	Q25561_MS19-036_T4_NR2	1784	60	28	28	29	405	1	1	2	0	5	0	0	2	1	0	1	1	11	4	1	1	1	8	0	1	1	3	2	3	3	5	1	0	0	2	0	5	5	1	4	2	2	1
ATRN_HUMAN	sp|O75882|ATRN_HUMAN Attractin OS=Homo sapiens OX=9606 GN=ATRN PE=1 SV=2	7.23982	158432	F215926.dat	Q25569_MS19-036_T4_NR10	1498	19.5	27	27	39	2891	12	8	11	8	15	4	10	19	16	3	6	9	13	5	9	19	10	20	7	9	6	21	20	23	9	20	22	18	32	9	8	14	22	9	35	14	27	11
CLUS_HUMAN	sp|P10909|CLUS_HUMAN Clusterin OS=Homo sapiens OX=9606 GN=CLU PE=1 SV=1	5.89038	52461	F215899.dat	Q25557_MS19-036_T3_NR15	1684	47.9	27	27	32	9307	49	27	69	22	56	6	44	53	55	1	29	54	44	23	63	52	34	44	62	41	34	82	108	53	84	72	69	55	78	84	59	95	92	58	96	64	43	53
PHLD_HUMAN	sp|P80108|PHLD_HUMAN Phosphatidylinositol-glycan-specific phospholipase D OS=Homo sapiens OX=9606 GN=GPLD1 PE=1 SV=3	5.90863	92278	F215873.dat	Q25543_MS19-036_T3_NR11	1590	44.9	27	27	30	3285	12	9	26	10	17	4	10	28	16	0	9	25	21	13	21	19	16	26	18	18	17	33	27	25	19	23	19	39	32	24	19	24	34	29	40	28	23	24
APOH_HUMAN	sp|P02749|APOH_HUMAN Beta-2-glycoprotein 1 OS=Homo sapiens OX=9606 GN=APOH PE=1 SV=3	8.34001	38273	F215984.dat	Q25584_MS19-036_T4_R8	1936	78.6	27	27	28	18832	124	68	71	72	177	53	100	126	141	30	56	144	156	80	153	109	134	114	101	71	65	169	168	126	188	115	196	183	185	184	118	179	160	81	207	141	171	159
PROS_HUMAN	sp|P07225|PROS_HUMAN Vitamin K-dependent protein S OS=Homo sapiens OX=9606 GN=PROS1 PE=1 SV=1	5.47899	75074	F215875.dat	Q25545_MS19-036_T3_NR13	1458	44.4	26	26	33	3625	21	13	17	9	27	5	15	37	36	4	14	32	20	16	30	32	22	26	11	18	18	35	29	25	26	33	28	25	28	24	18	26	53	15	56	23	36	20
KRT85_HUMAN	sp|P78386|KRT85_HUMAN Keratin, type II cuticular Hb5 OS=Homo sapiens OX=9606 GN=KRT85 PE=1 SV=1	6.27319	55766	F215921.dat	Q25564_MS19-036_T4_R6	3887	92.7	60	25	61	306	0	0	0	0	0	0	0	0	0	0	0	0	0	0	0	0	0	10	0	0	0	0	0	0	0	0	0	0	0	0	0	0	0	0	0	0	0	0
A1BG_HUMAN	sp|P04217|A1BG_HUMAN Alpha-1B-glycoprotein OS=Homo sapiens OX=9606 GN=A1BG PE=1 SV=4	5.56093	54220	F215922.dat	Q25565_MS19-036_T3_NR10	1498	64.4	25	25	30	12828	75	42	70	45	106	29	72	101	102	19	76	80	68	46	104	115	95	91	72	44	63	111	98	117	101	116	109	97	119	96	90	124	139	104	116	95	101	100
ZA2G_HUMAN	sp|P25311|ZA2G_HUMAN Zinc-alpha-2-glycoprotein OS=Homo sapiens OX=9606 GN=AZGP1 PE=1 SV=2	5.70825	34237	F215895.dat	Q25553_MS19-036_T3_NR16	1421	59.4	24	24	25	6007	19	19	41	16	43	6	24	43	47	6	27	37	36	13	41	51	42	38	28	31	29	66	51	30	37	60	45	48	62	54	39	39	44	29	55	43	41	41
FA5_HUMAN	sp|P12259|FA5_HUMAN Coagulation factor V OS=Homo sapiens OX=9606 GN=F5 PE=1 SV=4	5.6784	251545	F215910.dat	Q25562_MS19-036_T4_R12	1063	13.6	23	23	45	1877	9	8	11	5	14	3	8	14	14	3	8	11	14	7	15	21	10	11	4	7	12	20	10	11	12	26	30	13	19	25	30	29	20	16	15	8	21	9
ALS_HUMAN	sp|P35858|ALS_HUMAN Insulin-like growth factor-binding protein complex acid labile subunit OS=Homo sapiens OX=9606 GN=IGFALS PE=1 SV=1	6.32896	65994	F215873.dat	Q25543_MS19-036_T3_NR11	1352	45.5	23	23	28	4450	33	22	28	23	23	15	38	32	41	9	27	38	29	20	26	25	36	39	22	33	24	42	34	41	47	29	39	44	41	41	43	30	29	36	40	43	40	34
AMBP_HUMAN	sp|P02760|AMBP_HUMAN Protein AMBP OS=Homo sapiens OX=9606 GN=AMBP PE=1 SV=1	5.94615	38974	F215927.dat	Q25570_MS19-036_T4_R11	1423	54.3	23	23	25	7841	30	32	37	32	66	20	35	65	60	7	29	38	58	38	53	64	59	65	24	57	57	74	59	60	67	70	75	78	72	68	61	80	78	65	66	66	86	50
TENX_HUMAN	sp|P22105|TENX_HUMAN Tenascin-X OS=Homo sapiens OX=9606 GN=TNXB PE=1 SV=5	5.05242	458100	F215922.dat	Q25565_MS19-036_T3_NR10	1105	6.1	22	22	27	197	0	0	0	0	0	0	0	1	1	0	0	0	1	0	0	0	1	1	1	0	2	1	1	0	0	0	2	1	0	1	1	0	0	0	0	6	2	9
VTNC_HUMAN	sp|P04004|VTNC_HUMAN Vitronectin OS=Homo sapiens OX=9606 GN=VTN PE=1 SV=1	5.55122	54271	F215956.dat	Q25573_MS19-036_T3_NR17	1204	40	22	22	26	13053	98	78	68	54	102	33	97	97	128	27	46	87	92	71	101	89	74	82	81	87	83	107	105	128	162	91	138	125	111	151	97	140	126	110	153	89	91	104
PGRP2_HUMAN	sp|Q96PD5|PGRP2_HUMAN N-acetylmuramoyl-L-alanine amidase OS=Homo sapiens OX=9606 GN=PGLYRP2 PE=1 SV=1	7.25147	62178	F215877.dat	Q25547_MS19-036_T3_NR12	1467	59.5	22	22	25	4528	21	13	23	17	33	3	27	30	30	0	17	32	22	16	34	27	33	31	15	24	24	36	37	21	32	37	41	28	46	35	37	33	43	22	39	37	37	30
A2AP_HUMAN	sp|P08697|A2AP_HUMAN Alpha-2-antiplasmin OS=Homo sapiens OX=9606 GN=SERPINF2 PE=1 SV=3	5.86942	54531	F215983.dat	Q25583_MS19-036_T4_NR3	1378	54.8	22	22	25	7440	40	30	44	30	62	11	45	42	59	7	32	52	41	27	59	50	42	37	41	38	37	68	69	52	58	66	56	61	64	57	44	50	66	40	82	48	55	49
KAIN_HUMAN	sp|P29622|KAIN_HUMAN Kallistatin OS=Homo sapiens OX=9606 GN=SERPINA4 PE=1 SV=3	7.33806	48511	F215972.dat	Q25576_MS19-036_T4_R13	1361	62.1	22	22	25	4389	30	22	33	25	35	12	35	25	34	5	28	51	33	28	32	32	38	34	26	22	27	32	42	29	33	33	40	40	44	47	39	37	34	35	49	35	38	37
PEDF_HUMAN	sp|P36955|PEDF_HUMAN Pigment epithelium-derived factor OS=Homo sapiens OX=9606 GN=SERPINF1 PE=1 SV=4	5.97079	46283	F215926.dat	Q25569_MS19-036_T4_NR10	1367	51.4	20	20	29	4444	27	18	35	26	38	10	23	33	35	6	28	40	29	23	40	40	36	32	40	33	25	42	39	32	36	35	48	31	40	33	32	35	35	33	38	40	33	43
K1C16_HUMAN	sp|P08779|K1C16_HUMAN Keratin, type I cytoskeletal 16 OS=Homo sapiens OX=9606 GN=KRT16 PE=1 SV=4	4.98474	51236	F215868.dat	Q25541_MS19-036_T1(Baseline)_NR3	2176	69.1	35	19	39	561	0	0	3	15	4	9	15	0	0	1	4	8	2	16	1	10	5	12	3	15	3	0	1	10	5	1	1	0	12	0	3	1	7	4	1	2	4	11
FA12_HUMAN	sp|P00748|FA12_HUMAN Coagulation factor XII OS=Homo sapiens OX=9606 GN=F12 PE=1 SV=3	8.03576	67748	F215922.dat	Q25565_MS19-036_T3_NR10	1060	36.4	19	19	27	5798	46	22	24	23	44	9	19	55	48	5	23	53	30	32	44	42	47	37	17	37	35	69	49	47	57	57	51	55	56	45	54	58	45	63	65	45	57	47
ANGT_HUMAN	sp|P01019|ANGT_HUMAN Angiotensinogen OS=Homo sapiens OX=9606 GN=AGT PE=1 SV=1	5.86906	53121	F215921.dat	Q25564_MS19-036_T4_R6	1449	44.3	19	19	23	5848	34	23	45	27	44	20	29	33	88	19	35	56	31	20	41	33	44	29	45	21	21	36	84	64	26	36	32	32	52	29	23	19	29	58	52	36	31	31
A2GL_HUMAN	sp|P02750|A2GL_HUMAN Leucine-rich alpha-2-glycoprotein OS=Homo sapiens OX=9606 GN=LRG1 PE=1 SV=2	6.45098	38154	F215980.dat	Q25581_MS19-036_T4_NR5	1173	58.2	19	19	21	3878	15	10	29	11	42	8	12	21	36	6	39	19	19	10	30	50	35	30	28	17	18	40	30	33	19	52	21	20	49	21	24	28	26	26	17	25	33	22
LG3BP_HUMAN	sp|Q08380|LG3BP_HUMAN Galectin-3-binding protein OS=Homo sapiens OX=9606 GN=LGALS3BP PE=1 SV=1	5.12833	65289	F215921.dat	Q25564_MS19-036_T4_R6	1199	42.7	19	19	20	1700	3	1	13	2	11	0	2	11	9	0	3	7	7	2	13	10	8	13	14	15	3	16	13	35	11	17	26	10	17	5	7	15	10	12	14	9	13	21
PON1_HUMAN	sp|P27169|PON1_HUMAN Serum paraoxonase/arylesterase 1 OS=Homo sapiens OX=9606 GN=PON1 PE=1 SV=3	5.08416	39706	F215978.dat	Q25580_MS19-036_T4_R16	1372	69.6	18	18	21	3687	20	11	30	13	11	7	31	20	24	8	15	36	20	13	22	21	30	23	18	12	12	26	40	21	18	24	14	17	31	21	19	27	27	26	32	22	30	21
KRT34_HUMAN	sp|O76011|KRT34_HUMAN Keratin, type I cuticular Ha4 OS=Homo sapiens OX=9606 GN=KRT34 PE=1 SV=2	5.01316	49392	F215921.dat	Q25564_MS19-036_T4_R6	1736	70.6	29	17	33	92	0	0	0	0	0	0	0	0	0	0	0	0	0	0	0	0	0	0	0	0	0	0	0	0	0	0	0	0	0	0	0	0	0	0	0	0	0	0
FETUA_HUMAN	sp|P02765|FETUA_HUMAN Alpha-2-HS-glycoprotein OS=Homo sapiens OX=9606 GN=AHSG PE=1 SV=2	5.42731	39316	F215906.dat	Q25561_MS19-036_T4_NR2	1369	53.1	17	17	22	5482	30	23	59	12	33	9	31	24	54	0	19	16	49	23	43	25	32	38	50	28	26	45	37	46	43	40	83	46	25	49	45	37	66	51	42	40	27	35
HPT_HUMAN	sp|P00738|HPT_HUMAN Haptoglobin OS=Homo sapiens OX=9606 GN=HP PE=1 SV=1	6.12633	45177	F215980.dat	Q25581_MS19-036_T4_NR5	1626	68.2	27	16	28	1606	1	0	2	0	15	0	1	36	10	4	11	0	8	0	20	95	0	14	1	1	4	13	0	37	2	55	7	2	7	0	0	9	32	9	20	4	1	6
FA11_HUMAN	sp|P03951|FA11_HUMAN Coagulation factor XI OS=Homo sapiens OX=9606 GN=F11 PE=1 SV=1	8.47475	70064	F215875.dat	Q25545_MS19-036_T3_NR13	755	31.8	16	16	27	1156	10	3	8	1	12	0	8	6	9	0	4	15	9	4	7	10	14	9	0	6	10	11	12	5	11	9	6	10	10	10	14	11	12	3	18	11	10	8
HGFL_HUMAN	sp|P26927|HGFL_HUMAN Hepatocyte growth factor-like protein OS=Homo sapiens OX=9606 GN=MST1 PE=1 SV=2	7.98418	80268	F215910.dat	Q25562_MS19-036_T4_R12	603	29.3	16	16	27	1031	4	0	2	0	11	0	3	7	10	0	1	1	14	1	0	7	4	6	2	7	7	13	2	4	11	8	17	11	14	9	7	12	8	12	2	1	9	2
PRG4_HUMAN	sp|Q92954|PRG4_HUMAN Proteoglycan 4 OS=Homo sapiens OX=9606 GN=PRG4 PE=1 SV=3	9.53895	150968	F215823.dat	Q25509_MS19-036_T2_R2	640	14.2	16	16	24	812	15	6	3	5	3	2	7	7	9	0	4	20	12	8	10	4	6	8	2	12	6	7	5	8	11	3	16	1	5	7	12	20	7	4	15	6	10	4
SHBG_HUMAN	sp|P04278|SHBG_HUMAN Sex hormone-binding globulin OS=Homo sapiens OX=9606 GN=SHBG PE=1 SV=2	6.22458	43752	F215973.dat	Q25577_MS19-036_T4_R15	934	49	16	16	21	1167	2	1	7	0	11	1	2	3	13	2	1	1	2	2	1	2	12	2	1	1	8	5	2	23	4	4	1	2	10	9	12	11	8	31	6	9	8	4
THBG_HUMAN	sp|P05543|THBG_HUMAN Thyroxine-binding globulin OS=Homo sapiens OX=9606 GN=SERPINA7 PE=1 SV=2	5.87147	46295	F215828.dat	Q25514_MS19-036_T4_R9	984	48.7	16	16	19	3305	23	10	32	15	25	8	21	19	31	4	21	20	22	16	23	23	29	31	26	12	23	20	26	33	22	28	29	18	34	17	29	20	27	31	15	31	25	21
RET4_HUMAN	sp|P02753|RET4_HUMAN Retinol-binding protein 4 OS=Homo sapiens OX=9606 GN=RBP4 PE=1 SV=3	5.76208	22995	F215922.dat	Q25565_MS19-036_T3_NR10	1198	78.1	16	16	18	7740	27	17	44	25	38	13	35	30	42	7	28	40	64	30	30	30	41	36	32	45	28	59	85	42	60	45	73	72	38	67	56	40	72	66	76	49	52	49
LUM_HUMAN	sp|P51884|LUM_HUMAN Lumican OS=Homo sapiens OX=9606 GN=LUM PE=1 SV=2	6.15608	38405	F215878.dat	Q25548_MS19-036_T4_NR9	1038	45.3	16	16	16	4903	28	16	29	18	60	9	30	35	37	3	31	36	40	19	50	45	45	40	18	25	32	46	46	26	42	48	41	46	35	40	32	35	45	25	45	32	45	37
FCGBP_HUMAN	sp|Q9Y6R7|FCGBP_HUMAN IgGFc-binding protein OS=Homo sapiens OX=9606 GN=FCGBP PE=1 SV=3	5.14126	571639	F215922.dat	Q25565_MS19-036_T3_NR10	684	4	15	15	26	525	3	0	2	0	3	0	1	1	10	0	0	1	5	0	5	3	4	4	3	0	0	6	5	1	5	2	5	0	3	1	0	5	3	4	7	2	5	4
HABP2_HUMAN	sp|Q14520|HABP2_HUMAN Hyaluronan-binding protein 2 OS=Homo sapiens OX=9606 GN=HABP2 PE=1 SV=1	6.09255	62630	F215972.dat	Q25576_MS19-036_T4_R13	871	31.8	15	15	20	2794	13	9	6	4	17	1	12	23	26	0	5	20	19	6	20	21	13	18	9	10	11	26	19	27	26	25	30	19	27	30	20	27	27	28	35	18	26	18
DOPO_HUMAN	sp|P09172|DOPO_HUMAN Dopamine beta-hydroxylase OS=Homo sapiens OX=9606 GN=DBH PE=1 SV=3	5.96751	69021	F215873.dat	Q25543_MS19-036_T3_NR11	853	28.4	15	15	16	641	5	1	4	0	8	0	3	1	5	0	0	8	4	0	8	1	0	2	0	1	0	10	0	5	5	2	1	21	5	0	11	6	5	4	13	10	1	5
QSOX1_HUMAN	sp|O00391|QSOX1_HUMAN Sulfhydryl oxidase 1 OS=Homo sapiens OX=9606 GN=QSOX1 PE=1 SV=3	9.12843	82525	F215873.dat	Q25543_MS19-036_T3_NR11	671	23.7	14	14	20	994	4	2	3	1	8	0	5	7	7	0	2	8	8	2	5	6	9	5	4	4	5	12	5	4	5	6	12	11	7	10	10	9	9	2	13	5	11	7
CNDP1_HUMAN	sp|Q96KN2|CNDP1_HUMAN Beta-Ala-His dipeptidase OS=Homo sapiens OX=9606 GN=CNDP1 PE=1 SV=4	5.13983	56670	F215983.dat	Q25583_MS19-036_T4_NR3	751	32.3	14	14	19	1127	4	1	6	3	7	0	1	4	14	0	2	11	7	2	10	4	6	13	5	3	2	16	10	2	3	5	4	6	7	3	0	1	10	1	16	2	10	7
CBPB2_HUMAN	sp|Q96IY4|CBPB2_HUMAN Carboxypeptidase B2 OS=Homo sapiens OX=9606 GN=CPB2 PE=1 SV=2	7.60919	48393	F215899.dat	Q25557_MS19-036_T3_NR15	859	39.7	14	14	18	2410	12	13	14	9	18	4	17	16	16	4	12	15	15	12	15	14	12	15	13	15	11	22	19	15	14	18	20	17	22	27	24	23	22	22	23	17	16	18
ACTB_HUMAN	sp|P60709|ACTB_HUMAN Actin, cytoplasmic 1 OS=Homo sapiens OX=9606 GN=ACTB PE=1 SV=1	5.29047	41710	F215819.dat	Q25505_MS19-036_T2_R6	808	45.9	14	14	17	1329	14	4	14	6	9	1	12	9	12	0	6	11	8	5	10	15	10	11	7	7	6	12	12	14	9	11	10	6	13	18	12	16	18	11	7	9	12	10
IGHG3_HUMAN	sp|P01860|IGHG3_HUMAN Immunoglobulin heavy constant gamma 3 OS=Homo sapiens OX=9606 GN=IGHG3 PE=1 SV=2	8.23036	41260	F215925.dat	Q25568_MS19-036_T4_NR6	889	44.6	14	14	16	852	4	5	1	0	10	0	10	1	5	0	1	1	13	6	5	4	2	11	1	2	1	11	1	5	13	4	14	2	2	1	1	14	22	4	13	7	2	4
CPN2_HUMAN	sp|P22792|CPN2_HUMAN Carboxypeptidase N subunit 2 OS=Homo sapiens OX=9606 GN=CPN2 PE=1 SV=3	5.63035	60518	F215983.dat	Q25583_MS19-036_T4_NR3	865	32.7	14	14	14	2286	7	7	18	8	12	2	12	14	10	0	7	12	4	7	8	11	9	11	11	7	6	16	29	13	7	11	11	14	23	12	11	12	12	9	28	20	11	9
K2C5_HUMAN	sp|P13647|K2C5_HUMAN Keratin, type II cytoskeletal 5 OS=Homo sapiens OX=9606 GN=KRT5 PE=1 SV=3	7.58353	62340	F215868.dat	Q25541_MS19-036_T1(Baseline)_NR3	1678	40	31	13	45	804	8	7	11	10	5	18	6	5	4	13	11	14	12	9	3	24	14	16	6	4	7	3	9	5	8	9	7	5	6	5	5	10	4	7	9	3	5	8
K1C17_HUMAN	sp|Q04695|K1C17_HUMAN Keratin, type I cytoskeletal 17 OS=Homo sapiens OX=9606 GN=KRT17 PE=1 SV=2	4.9716	48076	F215868.dat	Q25541_MS19-036_T1(Baseline)_NR3	1492	63.2	27	13	33	61	0	0	2	1	0	4	1	0	0	3	2	1	0	2	0	0	1	0	2	2	0	0	0	0	1	0	0	0	0	0	0	0	0	0	0	0	0	0
DESP_HUMAN	sp|P15924|DESP_HUMAN Desmoplakin OS=Homo sapiens OX=9606 GN=DSP PE=1 SV=3	6.43523	331569	F215868.dat	Q25541_MS19-036_T1(Baseline)_NR3	450	5.4	13	13	27	149	3	1	0	3	0	9	0	0	1	6	2	3	5	0	0	7	1	6	1	0	2	1	1	0	2	4	1	0	0	0	0	1	0	3	1	0	0	1
BGH3_HUMAN	sp|Q15582|BGH3_HUMAN Transforming growth factor-beta-induced protein ig-h3 OS=Homo sapiens OX=9606 GN=TGFBI PE=1 SV=1	7.619	74634	F215821.dat	Q25507_MS19-036_T3_NR1	703	20.2	13	13	26	854	4	0	3	2	3	1	2	4	15	1	3	16	4	2	4	6	5	5	1	4	3	9	8	11	4	10	11	9	8	11	7	16	9	9	12	6	7	5
FBLN1_HUMAN	sp|P23142|FBLN1_HUMAN Fibulin-1 OS=Homo sapiens OX=9606 GN=FBLN1 PE=1 SV=4	5.0722	77162	F215983.dat	Q25583_MS19-036_T4_NR3	692	25.7	13	13	21	1885	5	5	5	1	23	0	7	14	17	0	5	9	19	5	15	15	19	18	2	6	11	24	13	17	12	20	18	21	20	18	17	18	19	15	17	20	21	14
ZPI_HUMAN	sp|Q9UK55|ZPI_HUMAN Protein Z-dependent protease inhibitor OS=Homo sapiens OX=9606 GN=SERPINA10 PE=1 SV=1	8.27662	50674	F215922.dat	Q25565_MS19-036_T3_NR10	671	32.7	13	13	21	1358	7	5	9	1	11	1	5	13	9	0	5	8	6	3	15	14	10	5	5	6	6	9	8	12	10	11	17	6	14	7	13	12	10	12	13	9	12	8
HGFA_HUMAN	sp|Q04756|HGFA_HUMAN Hepatocyte growth factor activator OS=Homo sapiens OX=9606 GN=HGFAC PE=1 SV=1	6.98827	70636	F215922.dat	Q25565_MS19-036_T3_NR10	675	25.2	13	13	19	1453	4	3	7	3	8	1	9	11	8	0	3	3	14	4	10	12	11	10	6	6	10	15	12	5	13	14	20	18	8	15	12	13	17	6	5	9	14	10
FHR5_HUMAN	sp|Q9BXR6|FHR5_HUMAN Complement factor H-related protein 5 OS=Homo sapiens OX=9606 GN=CFHR5 PE=1 SV=1	6.80537	64377	F215936.dat	Q25571_MS19-036_T1(Baseline)_NR5	627	29.9	14	13	19	858	3	2	2	0	7	1	1	13	6	0	1	1	7	0	10	7	4	6	0	2	3	8	1	14	5	12	8	4	10	7	2	10	15	9	1	0	4	2
CRAC1_HUMAN	sp|Q9NQ79|CRAC1_HUMAN Cartilage acidic protein 1 OS=Homo sapiens OX=9606 GN=CRTAC1 PE=1 SV=2	4.9486	71376	F215670.dat	Q25469_MS19-036_T2_R1	632	27.7	13	13	18	932	2	2	3	4	18	0	4	6	4	0	4	13	10	3	4	9	9	11	1	6	5	6	7	2	7	7	5	6	4	8	8	5	13	8	12	7	11	7
ECM1_HUMAN	sp|Q16610|ECM1_HUMAN Extracellular matrix protein 1 OS=Homo sapiens OX=9606 GN=ECM1 PE=1 SV=2	6.24876	60635	F215837.dat	Q25523_MS19-036_T4_NR14	524	31.5	13	13	18	1356	9	3	2	3	16	1	7	8	9	0	3	8	13	6	15	8	8	12	3	6	7	13	6	9	19	8	13	8	17	18	13	10	13	7	17	10	13	12
FA10_HUMAN	sp|P00742|FA10_HUMAN Coagulation factor X OS=Homo sapiens OX=9606 GN=F10 PE=1 SV=2	5.68075	54697	F215977.dat	Q25579_MS19-036_T1(Baseline)_R12	693	26.8	13	13	17	1464	4	3	7	4	10	1	7	9	16	0	3	14	6	1	14	12	11	8	6	1	1	11	18	10	8	12	12	7	13	9	3	12	17	6	15	8	13	14
APOL1_HUMAN	sp|O14791|APOL1_HUMAN Apolipoprotein L1 OS=Homo sapiens OX=9606 GN=APOL1 PE=1 SV=5	5.59692	43947	F215924.dat	Q25567_MS19-036_T4_R14	700	32.9	12	12	20	1071	5	3	7	3	6	0	4	4	13	0	2	4	7	4	2	3	6	7	6	5	1	6	10	9	5	5	11	7	5	2	3	5	7	11	5	3	4	6
MASP1_HUMAN	sp|P48740|MASP1_HUMAN Mannan-binding lectin serine protease 1 OS=Homo sapiens OX=9606 GN=MASP1 PE=1 SV=3	5.29124	79195	F215875.dat	Q25545_MS19-036_T3_NR13	653	22.2	13	12	17	1129	2	1	1	2	14	0	3	11	11	0	1	6	8	1	9	8	6	7	1	2	2	10	11	9	7	5	9	7	13	5	2	7	10	8	14	5	11	11
CD5L_HUMAN	sp|O43866|CD5L_HUMAN CD5 antigen-like OS=Homo sapiens OX=9606 GN=CD5L PE=1 SV=1	5.28255	38063	F216014.dat	Q25574_MS19-036_T3_NR6	614	45.8	12	12	17	938	2	1	2	0	10	0	1	1	4	0	0	0	12	1	3	9	3	6	1	1	0	14	5	8	9	9	17	2	13	4	5	11	14	3	10	6	6	6
NCHL1_HUMAN	sp|O00533|NCHL1_HUMAN Neural cell adhesion molecule L1-like protein OS=Homo sapiens OX=9606 GN=CHL1 PE=1 SV=4	5.51227	134987	F215978.dat	Q25580_MS19-036_T4_R16	488	13.9	12	12	16	221	0	0	1	0	2	0	0	2	0	0	2	0	0	0	0	4	0	0	1	0	1	2	3	0	1	4	0	1	3	0	0	0	3	0	1	0	2	1
CBG_HUMAN	sp|P08185|CBG_HUMAN Corticosteroid-binding globulin OS=Homo sapiens OX=9606 GN=SERPINA6 PE=1 SV=1	5.63822	45112	F215820.dat	Q25506_MS19-036_T4_R4	752	41.7	12	12	13	1013	2	3	8	3	10	0	3	6	8	0	3	8	4	2	7	8	4	7	3	3	4	9	10	11	4	8	4	7	8	5	4	4	10	11	11	7	3	5
SAMP_HUMAN	sp|P02743|SAMP_HUMAN Serum amyloid P-component OS=Homo sapiens OX=9606 GN=APCS PE=1 SV=2	6.09909	25371	F215969.dat	Q25575_MS19-036_T4_R2	721	48.9	12	12	13	3512	24	20	36	24	18	12	25	22	27	10	27	28	23	24	23	26	24	22	24	22	22	32	29	24	25	37	32	19	26	26	33	32	28	31	29	31	18	28
TTHY_HUMAN	sp|P02766|TTHY_HUMAN Transthyretin OS=Homo sapiens OX=9606 GN=TTR PE=1 SV=1	5.52162	15877	F215895.dat	Q25553_MS19-036_T3_NR16	1222	69.4	12	12	12	7725	39	37	90	56	45	24	47	40	40	20	47	43	52	47	34	36	43	45	73	39	37	63	98	43	54	49	61	54	49	60	62	39	52	54	50	52	49	67
K1H2_HUMAN	sp|Q14532|K1H2_HUMAN Keratin, type I cuticular Ha2 OS=Homo sapiens OX=9606 GN=KRT32 PE=2 SV=3	4.78462	50310	F215851.dat	Q25537_MS19-036_T3_R9	1353	48	22	11	25	59	0	0	0	0	0	0	0	0	0	0	0	0	0	0	0	0	0	0	0	0	0	0	0	0	0	0	0	0	0	0	0	0	0	0	0	0	0	0
CBPN_HUMAN	sp|P15169|CBPN_HUMAN Carboxypeptidase N catalytic chain OS=Homo sapiens OX=9606 GN=CPN1 PE=1 SV=1	6.85833	52253	F215821.dat	Q25507_MS19-036_T3_NR1	523	26.4	11	11	18	1802	5	5	4	5	7	1	8	12	16	0	7	14	9	6	13	15	10	11	3	6	5	19	12	19	18	20	21	10	16	19	18	17	14	14	18	15	10	11
ENPP2_HUMAN	sp|Q13822|ENPP2_HUMAN Ectonucleotide pyrophosphatase/phosphodiesterase family member 2 OS=Homo sapiens OX=9606 GN=ENPP2 PE=1 SV=3	7.13871	98930	F215898.dat	Q25556_MS19-036_T2_NR1	501	13.9	11	11	18	182	0	0	0	0	0	0	0	0	11	0	0	0	0	0	0	1	3	0	0	0	0	0	0	7	0	0	1	2	0	2	3	0	1	8	0	2	4	2
CHLE_HUMAN	sp|P06276|CHLE_HUMAN Cholinesterase OS=Homo sapiens OX=9606 GN=BCHE PE=1 SV=1	7.12035	68374	F215926.dat	Q25569_MS19-036_T4_NR10	563	21.8	11	11	17	687	1	2	4	3	5	0	2	5	3	0	0	5	6	1	5	5	7	6	3	3	3	7	7	2	1	2	5	5	11	3	4	3	4	3	4	4	6	4
TETN_HUMAN	sp|P05452|TETN_HUMAN Tetranectin OS=Homo sapiens OX=9606 GN=CLEC3B PE=1 SV=3	5.52244	22522	F215984.dat	Q25584_MS19-036_T4_R8	717	52	11	11	13	1450	5	0	11	3	5	0	5	6	9	0	2	4	9	7	6	6	5	7	11	9	6	9	17	5	11	5	14	8	10	16	11	10	17	8	7	9	7	4
FA9_HUMAN	sp|P00740|FA9_HUMAN Coagulation factor IX OS=Homo sapiens OX=9606 GN=F9 PE=1 SV=2	5.33734	51745	F215888.dat	Q25551_MS19-036_T4_R5	590	36.2	11	11	13	1889	6	3	7	6	17	1	9	18	15	1	5	8	7	5	15	15	10	12	7	11	9	18	17	13	16	17	15	17	18	11	18	20	17	15	23	15	16	13
APOD_HUMAN	sp|P05090|APOD_HUMAN Apolipoprotein D OS=Homo sapiens OX=9606 GN=APOD PE=1 SV=1	5.05825	21262	F215978.dat	Q25580_MS19-036_T4_R16	765	41.3	11	11	12	3818	13	9	36	6	8	3	22	22	8	0	12	25	26	6	21	21	19	12	19	13	8	30	48	12	13	23	10	35	35	21	23	11	25	15	26	17	20	14
FIBA_HUMAN	sp|P02671|FIBA_HUMAN Fibrinogen alpha chain OS=Homo sapiens OX=9606 GN=FGA PE=1 SV=2	5.69562	94914	F215906.dat	Q25561_MS19-036_T4_NR2	639	16.4	11	11	12	945	2	1	4	3	4	0	3	5	8	0	0	2	2	2	2	8	3	5	4	3	6	7	3	15	5	10	3	5	8	4	4	8	10	12	5	3	6	2
K2C4_HUMAN	sp|P19013|K2C4_HUMAN Keratin, type II cytoskeletal 4 OS=Homo sapiens OX=9606 GN=KRT4 PE=1 SV=4	6.25362	57250	F215818.dat	Q25504_MS19-036_T1(Baseline)_NR10	740	28.7	15	10	20	25	0	0	0	0	0	0	0	0	0	0	0	0	0	0	0	0	1	0	0	0	0	0	0	1	0	0	0	0	0	0	0	0	0	0	0	0	0	0
IPSP_HUMAN	sp|P05154|IPSP_HUMAN Plasma serine protease inhibitor OS=Homo sapiens OX=9606 GN=SERPINA5 PE=1 SV=3	9.2984	45646	F215926.dat	Q25569_MS19-036_T4_NR10	485	24.6	10	10	15	1193	5	3	6	5	12	0	7	8	10	0	7	14	7	7	7	5	8	7	5	12	5	10	14	3	8	9	14	11	14	12	10	12	11	7	13	11	12	12
PCYOX_HUMAN	sp|Q9UHG3|PCYOX_HUMAN Prenylcysteine oxidase 1 OS=Homo sapiens OX=9606 GN=PCYOX1 PE=1 SV=3	5.79949	56604	F215969.dat	Q25575_MS19-036_T4_R2	457	26.5	10	10	14	527	2	1	3	0	1	0	4	1	7	0	0	10	3	1	1	2	1	2	0	1	0	7	2	4	1	2	4	4	3	4	5	1	3	5	9	5	2	2
APOA2_HUMAN	sp|P02652|APOA2_HUMAN Apolipoprotein A-II OS=Homo sapiens OX=9606 GN=APOA2 PE=1 SV=1	6.26951	11168	F215978.dat	Q25580_MS19-036_T4_R16	714	69	10	10	12	4828	23	19	74	44	24	13	23	27	23	10	23	34	30	20	16	19	29	26	43	21	17	36	70	26	21	32	28	29	29	37	37	25	27	33	37	34	28	18
FCN3_HUMAN	sp|O75636|FCN3_HUMAN Ficolin-3 OS=Homo sapiens OX=9606 GN=FCN3 PE=1 SV=2	6.20214	32882	F215910.dat	Q25562_MS19-036_T4_R12	567	36.1	10	10	12	1704	11	5	7	4	9	1	9	13	15	0	7	11	10	8	12	13	12	8	7	4	7	16	14	16	13	12	13	6	19	14	8	15	18	12	20	13	9	14
CO8G_HUMAN	sp|P07360|CO8G_HUMAN Complement component C8 gamma chain OS=Homo sapiens OX=9606 GN=C8G PE=1 SV=3	8.49254	22264	F215820.dat	Q25506_MS19-036_T4_R4	692	72.3	10	10	11	1709	13	3	18	6	10	0	13	10	13	0	8	13	13	7	14	13	10	12	14	9	9	11	19	8	14	11	16	7	13	15	14	18	18	14	11	13	8	13
FIBG_HUMAN	sp|P02679|FIBG_HUMAN Fibrinogen gamma chain OS=Homo sapiens OX=9606 GN=FGG PE=1 SV=3	5.36755	51479	F215824.dat	Q25510_MS19-036_T2_R9	408	25.8	10	10	10	98	0	0	0	0	0	0	0	0	0	0	0	0	0	0	0	5	0	1	0	0	0	0	0	2	0	7	0	0	0	0	0	0	2	0	0	0	0	0
K1C14_HUMAN	sp|P02533|K1C14_HUMAN Keratin, type I cytoskeletal 14 OS=Homo sapiens OX=9606 GN=KRT14 PE=1 SV=4	5.08769	51529	F215868.dat	Q25541_MS19-036_T1(Baseline)_NR3	1905	57.8	33	9	40	389	6	5	5	13	0	12	7	1	0	9	7	7	8	8	1	14	11	9	3	6	7	0	6	4	0	2	2	1	4	1	1	1	2	5	1	2	1	4
KRT35_HUMAN	sp|Q92764|KRT35_HUMAN Keratin, type I cuticular Ha5 OS=Homo sapiens OX=9606 GN=KRT35 PE=2 SV=5	4.85071	50329	F215921.dat	Q25564_MS19-036_T4_R6	993	47	17	9	19	41	0	0	0	0	0	0	0	0	0	0	0	0	0	0	0	0	0	7	0	0	0	0	0	0	0	0	0	0	0	0	0	0	0	0	0	0	0	0
PROP_HUMAN	sp|P27918|PROP_HUMAN Properdin OS=Homo sapiens OX=9606 GN=CFP PE=1 SV=2	8.32017	51242	F215922.dat	Q25565_MS19-036_T3_NR10	456	28.4	9	9	14	955	3	1	1	2	10	0	4	11	5	1	1	3	10	2	5	8	6	5	1	7	4	17	5	6	8	8	14	7	7	11	8	7	9	6	10	4	8	9
COMP_HUMAN	sp|P49747|COMP_HUMAN Cartilage oligomeric matrix protein OS=Homo sapiens OX=9606 GN=COMP PE=1 SV=2	4.35682	82808	F215841.dat	Q25527_MS19-036_T3_R16	372	20.9	9	9	14	449	0	0	0	0	7	0	1	3	4	0	0	4	4	2	1	3	2	1	0	3	2	1	4	1	1	5	6	3	2	4	7	0	6	2	5	1	2	1
FETUB_HUMAN	sp|Q9UGM5|FETUB_HUMAN Fetuin-B OS=Homo sapiens OX=9606 GN=FETUB PE=1 SV=2	6.45844	42028	F215921.dat	Q25564_MS19-036_T4_R6	592	34.3	9	9	13	1279	3	4	3	3	7	1	4	4	16	1	3	4	5	4	10	9	3	6	5	7	5	11	5	18	5	12	8	6	8	7	6	5	13	8	8	9	4	4
APOM_HUMAN	sp|O95445|APOM_HUMAN Apolipoprotein M OS=Homo sapiens OX=9606 GN=APOM PE=1 SV=2	5.65984	21239	F215902.dat	Q25559_MS19-036_T4_NR7	471	33	9	9	12	1811	8	5	14	7	12	4	9	11	11	1	8	9	12	5	12	10	8	10	10	5	7	14	21	9	13	11	12	12	16	9	14	10	19	8	17	9	9	10
BTD_HUMAN	sp|P43251|BTD_HUMAN Biotinidase OS=Homo sapiens OX=9606 GN=BTD PE=1 SV=2	5.81314	61093	F215878.dat	Q25548_MS19-036_T4_NR9	470	19.2	9	9	12	962	5	3	5	3	5	2	5	6	8	0	4	6	5	3	6	6	6	4	7	4	5	5	12	9	5	9	8	10	7	5	5	5	8	6	11	6	8	8
CD14_HUMAN	sp|P08571|CD14_HUMAN Monocyte differentiation antigen CD14 OS=Homo sapiens OX=9606 GN=CD14 PE=1 SV=2	5.84463	40051	F215975.dat	Q25578_MS19-036_T3_NR14	527	30.7	9	9	11	762	1	0	4	1	4	0	2	7	5	0	2	4	3	1	4	6	4	3	2	3	3	8	7	4	4	11	4	4	8	3	4	5	6	5	8	4	4	3
C163A_HUMAN	sp|Q86VB7|C163A_HUMAN Scavenger receptor cysteine-rich type 1 protein M130 OS=Homo sapiens OX=9606 GN=CD163 PE=1 SV=2	5.60872	125369	F215926.dat	Q25569_MS19-036_T4_NR10	400	8.4	9	9	11	155	0	0	0	0	4	0	0	0	2	0	0	0	0	0	0	0	0	0	0	0	0	3	0	0	2	1	2	0	0	0	0	1	0	0	2	0	2	0
VCAM1_HUMAN	sp|P19320|VCAM1_HUMAN Vascular cell adhesion protein 1 OS=Homo sapiens OX=9606 GN=VCAM1 PE=1 SV=1	5.1431	81224	F215926.dat	Q25569_MS19-036_T4_NR10	322	13.3	9	9	11	48	0	0	0	0	2	0	0	0	0	0	1	0	0	0	0	0	0	0	0	0	0	0	0	0	0	0	0	0	0	0	0	0	0	0	0	0	0	0
LBP_HUMAN	sp|P18428|LBP_HUMAN Lipopolysaccharide-binding protein OS=Homo sapiens OX=9606 GN=LBP PE=1 SV=3	6.23199	53350	F215877.dat	Q25547_MS19-036_T3_NR12	560	20.2	9	9	10	723	3	2	2	0	6	1	4	7	7	1	1	2	2	1	7	8	3	1	4	1	2	7	5	9	10	11	7	2	3	1	4	9	9	10	6	6	2	2
ALDOB_HUMAN	sp|P05062|ALDOB_HUMAN Fructose-bisphosphate aldolase B OS=Homo sapiens OX=9606 GN=ALDOB PE=1 SV=2	8.00611	39448	F215947.dat	Q25572_MS19-036_T4_R10	522	30.8	9	9	10	48	0	0	0	0	0	0	0	0	0	0	0	0	0	0	0	0	0	0	0	0	0	0	0	0	0	0	4	0	0	0	0	5	0	0	0	0	0	0
CRP_HUMAN	sp|P02741|CRP_HUMAN C-reactive protein OS=Homo sapiens OX=9606 GN=CRP PE=1 SV=1	5.45164	25023	F215980.dat	Q25581_MS19-036_T4_NR5	481	29	9	9	10	732	2	0	0	3	11	2	0	9	8	2	6	1	2	0	9	22	3	5	4	4	1	11	1	18	3	15	1	0	14	0	0	13	6	6	0	4	3	1
GP1BA_HUMAN	sp|P07359|GP1BA_HUMAN Platelet glycoprotein Ib alpha chain OS=Homo sapiens OX=9606 GN=GP1BA PE=1 SV=2	5.87085	71495	F215829.dat	Q25515_MS19-036_T2_R16	477	14.9	9	9	10	1252	16	15	11	9	14	3	14	13	7	0	13	19	15	14	13	12	11	14	2	14	10	12	6	9	17	9	9	17	13	13	14	18	8	15	8	12	12	8
VSIG8_HUMAN	sp|P0DPA2|VSIG8_HUMAN V-set and immunoglobulin domain-containing protein 8 OS=Homo sapiens OX=9606 GN=VSIG8 PE=2 SV=1	6.83763	43863	F215851.dat	Q25537_MS19-036_T3_R9	621	26.6	9	9	9	41	0	0	0	0	0	0	0	0	0	0	0	0	0	0	0	0	0	0	0	0	0	0	0	0	0	0	0	0	0	0	0	0	0	0	0	0	0	0
C1QB_HUMAN	sp|P02746|C1QB_HUMAN Complement C1q subcomponent subunit B OS=Homo sapiens OX=9606 GN=C1QB PE=1 SV=3	8.83124	26704	F215910.dat	Q25562_MS19-036_T4_R12	609	37.2	9	9	9	3868	24	18	29	16	22	10	32	19	26	9	19	25	28	20	27	29	25	22	20	18	18	31	29	28	37	31	42	20	27	38	36	51	42	36	23	31	23	34
CAH1_HUMAN	sp|P00915|CAH1_HUMAN Carbonic anhydrase 1 OS=Homo sapiens OX=9606 GN=CA1 PE=1 SV=2	6.59181	28852	F215881.dat	Q25549_MS19-036_T4_NR4	514	47.9	9	9	9	769	11	6	4	0	3	0	11	7	3	0	5	7	7	3	5	5	1	1	1	1	5	8	8	0	0	1	11	5	4	9	2	5	15	3	15	2	3	8
K1H1_HUMAN	sp|Q15323|K1H1_HUMAN Keratin, type I cuticular Ha1 OS=Homo sapiens OX=9606 GN=KRT31 PE=1 SV=3	4.83834	47207	F215921.dat	Q25564_MS19-036_T4_R6	2218	72.6	34	8	37	121	0	0	0	0	0	0	0	0	0	0	0	0	0	0	0	0	0	8	0	0	0	0	0	0	0	0	0	0	0	0	0	0	0	0	0	0	0	0
A1AG1_HUMAN	sp|P02763|A1AG1_HUMAN Alpha-1-acid glycoprotein 1 OS=Homo sapiens OX=9606 GN=ORM1 PE=1 SV=1	4.93352	23497	F215972.dat	Q25576_MS19-036_T4_R13	1008	66.7	16	8	20	3937	16	11	43	24	27	13	17	17	21	10	20	27	16	12	40	28	24	20	51	15	19	32	68	19	18	32	15	29	44	20	11	13	18	16	21	19	19	31
A1AG2_HUMAN	sp|P19652|A1AG2_HUMAN Alpha-1-acid glycoprotein 2 OS=Homo sapiens OX=9606 GN=ORM2 PE=1 SV=2	5.03366	23588	F215881.dat	Q25549_MS19-036_T4_NR4	895	61.7	15	8	17	2446	5	4	20	7	18	2	2	14	14	0	6	14	6	1	12	18	12	16	22	8	10	27	31	16	10	22	15	16	21	10	11	11	18	12	20	17	18	11
FBLN3_HUMAN	sp|Q12805|FBLN3_HUMAN EGF-containing fibulin-like extracellular matrix protein 1 OS=Homo sapiens OX=9606 GN=EFEMP1 PE=1 SV=2	4.95417	54604	F215925.dat	Q25568_MS19-036_T4_NR6	402	20.5	8	8	16	512	1	1	0	0	5	0	2	0	1	0	0	1	2	0	2	1	2	1	1	1	1	3	3	2	4	4	6	5	3	7	1	3	7	7	4	5	2	3
PLAK_HUMAN	sp|P14923|PLAK_HUMAN Junction plakoglobin OS=Homo sapiens OX=9606 GN=JUP PE=1 SV=3	5.7542	81693	F215921.dat	Q25564_MS19-036_T4_R6	394	11.9	8	8	16	136	1	1	1	3	1	8	0	1	0	4	1	2	5	0	0	8	2	6	0	0	1	0	2	0	1	1	1	0	1	0	0	1	1	1	1	0	0	1
HORN_HUMAN	sp|Q86YZ3|HORN_HUMAN Hornerin OS=Homo sapiens OX=9606 GN=HRNR PE=1 SV=2	10.0486	282228	F215868.dat	Q25541_MS19-036_T1(Baseline)_NR3	385	4.5	8	8	12	286	1	1	0	0	1	4	0	3	2	2	0	2	4	2	0	3	2	3	0	1	4	3	3	4	3	3	2	2	3	1	1	4	2	2	4	1	2	2
PON3_HUMAN	sp|Q15166|PON3_HUMAN Serum paraoxonase/lactonase 3 OS=Homo sapiens OX=9606 GN=PON3 PE=1 SV=3	5.24216	39582	F215873.dat	Q25543_MS19-036_T3_NR11	442	33.1	8	8	11	250	0	0	7	0	0	0	1	1	1	0	2	1	2	0	1	1	2	1	0	1	1	1	2	0	1	0	0	3	3	3	5	1	2	2	1	1	4	1
APMAP_HUMAN	sp|Q9HDC9|APMAP_HUMAN Adipocyte plasma membrane-associated protein OS=Homo sapiens OX=9606 GN=APMAP PE=1 SV=2	5.82009	46451	F215888.dat	Q25551_MS19-036_T4_R5	318	28.4	8	8	11	226	0	1	2	0	2	0	1	3	2	0	0	1	1	0	2	1	3	2	2	0	0	5	2	2	0	3	1	0	3	1	3	0	1	2	4	0	5	3
SAA4_HUMAN	sp|P35542|SAA4_HUMAN Serum amyloid A-4 protein OS=Homo sapiens OX=9606 GN=SAA4 PE=1 SV=2	9.16876	14737	F215980.dat	Q25581_MS19-036_T4_NR5	517	66.9	8	8	10	1852	3	1	17	4	14	0	6	9	9	0	5	6	10	3	12	11	8	7	10	9	7	16	16	11	6	15	14	8	11	14	15	16	17	13	9	8	13	16
SEPP1_HUMAN	sp|P49908|SEPP1_HUMAN Selenoprotein P OS=Homo sapiens OX=9606 GN=SELENOP PE=1 SV=3	8.08207	43147	F215926.dat	Q25569_MS19-036_T4_NR10	374	20.2	8	8	10	829	5	5	6	4	4	2	6	8	6	0	3	12	8	2	8	7	9	5	3	4	3	8	8	5	5	6	4	10	9	9	5	5	7	3	13	6	6	8
KRT86_HUMAN	sp|O43790|KRT86_HUMAN Keratin, type II cuticular Hb6 OS=Homo sapiens OX=9606 GN=KRT86 PE=1 SV=1	5.56405	53466	F215921.dat	Q25564_MS19-036_T4_R6	3769	95.3	62	7	64	44	0	0	0	0	0	0	0	0	0	0	0	0	0	0	0	0	0	0	0	0	0	0	0	0	0	0	0	0	0	0	0	0	0	0	0	0	0	0
KRT83_HUMAN	sp|P78385|KRT83_HUMAN Keratin, type II cuticular Hb3 OS=Homo sapiens OX=9606 GN=KRT83 PE=1 SV=2	5.53997	54160	F215921.dat	Q25564_MS19-036_T4_R6	3364	78.5	54	7	55	47	0	0	0	0	0	0	0	0	0	0	0	0	0	0	0	0	0	0	0	0	0	0	0	0	0	0	0	0	0	0	0	0	0	0	0	0	0	0
KT33A_HUMAN	sp|O76009|KT33A_HUMAN Keratin, type I cuticular Ha3-I OS=Homo sapiens OX=9606 GN=KRT33A PE=2 SV=2	4.78145	45911	F215921.dat	Q25564_MS19-036_T4_R6	2329	81.7	38	7	40	42	0	0	0	0	0	0	0	0	0	0	0	0	0	0	0	0	0	0	0	0	0	0	0	0	0	0	0	0	0	0	0	0	0	0	0	0	0	0
KT33B_HUMAN	sp|Q14525|KT33B_HUMAN Keratin, type I cuticular Ha3-II OS=Homo sapiens OX=9606 GN=KRT33B PE=1 SV=3	4.8065	46185	F215921.dat	Q25564_MS19-036_T4_R6	2092	79.2	35	7	37	29	0	0	0	0	0	0	0	0	0	0	0	0	0	0	0	0	0	4	0	0	0	0	0	0	0	0	0	0	0	0	0	0	0	0	0	0	0	0
HPTR_HUMAN	sp|P00739|HPTR_HUMAN Haptoglobin-related protein OS=Homo sapiens OX=9606 GN=HPR PE=2 SV=2	6.63188	39005	F215980.dat	Q25581_MS19-036_T4_NR5	926	51.4	18	7	21	555	0	0	0	0	5	0	0	13	3	1	4	0	2	0	5	31	0	4	0	0	1	4	0	15	0	14	2	0	1	0	0	4	20	3	7	3	0	2
HBB_HUMAN	sp|P68871|HBB_HUMAN Hemoglobin subunit beta OS=Homo sapiens OX=9606 GN=HBB PE=1 SV=2	6.74449	15988	F215885.dat	Q25550_MS19-036_T3_NR4	848	89.8	13	7	14	185	1	1	1	0	1	0	2	1	1	0	1	1	1	1	1	1	0	1	1	0	1	2	1	1	1	1	1	1	1	1	1	1	2	1	4	1	1	1
GPV_HUMAN	sp|P40197|GPV_HUMAN Platelet glycoprotein V OS=Homo sapiens OX=9606 GN=GP5 PE=1 SV=1	9.72768	60921	F215874.dat	Q25544_MS19-036_T4_NR8	277	18.8	7	7	10	332	0	0	1	0	1	0	0	3	3	0	0	2	0	0	2	3	2	2	0	0	0	5	2	3	0	2	2	1	3	2	3	3	2	4	3	0	2	0
PYGM_HUMAN	sp|P11217|PYGM_HUMAN Glycogen phosphorylase, muscle form OS=Homo sapiens OX=9606 GN=PYGM PE=1 SV=6	6.56972	97031	F215691.dat	Q25482_MS19-036_T1(Baseline)_NR2	255	9.9	7	7	10	63	0	2	2	0	1	2	0	0	0	0	0	0	3	4	0	0	0	7	2	0	0	0	1	0	1	0	1	0	0	2	1	1	0	0	1	1	0	0
PROC_HUMAN	sp|P04070|PROC_HUMAN Vitamin K-dependent protein C OS=Homo sapiens OX=9606 GN=PROC PE=1 SV=1	5.85184	52037	F215899.dat	Q25557_MS19-036_T3_NR15	314	19.7	7	7	9	438	1	0	0	0	2	0	0	0	3	0	0	3	1	0	1	4	0	2	1	0	1	4	4	2	4	2	4	5	4	3	2	2	4	3	6	0	2	0
MMP9_HUMAN	sp|P14780|MMP9_HUMAN Matrix metalloproteinase-9 OS=Homo sapiens OX=9606 GN=MMP9 PE=1 SV=3	5.69368	78408	F215924.dat	Q25567_MS19-036_T4_R14	203	13.7	7	7	9	62	0	0	1	0	2	0	0	2	0	0	0	0	0	0	1	1	0	1	2	2	1	0	1	5	0	0	0	0	0	0	0	2	0	1	0	0	0	1
IGKC_HUMAN	sp|P01834|IGKC_HUMAN Immunoglobulin kappa constant OS=Homo sapiens OX=9606 GN=IGKC PE=1 SV=2	6.11161	11758	F215906.dat	Q25561_MS19-036_T4_NR2	538	81.3	7	7	8	286	0	0	3	0	0	0	0	0	0	0	0	0	12	3	0	1	0	3	0	1	0	1	2	0	1	1	1	0	0	0	0	5	5	1	1	0	0	1
HBA_HUMAN	sp|P69905|HBA_HUMAN Hemoglobin subunit alpha OS=Homo sapiens OX=9606 GN=HBA1 PE=1 SV=2	8.71689	15248	F215885.dat	Q25550_MS19-036_T3_NR4	396	50.7	7	7	8	111	0	0	0	0	0	0	0	3	0	0	0	0	0	0	1	1	0	1	0	0	0	1	0	0	0	0	0	0	0	0	0	0	2	0	3	0	0	0
C1QA_HUMAN	sp|P02745|C1QA_HUMAN Complement C1q subcomponent subunit A OS=Homo sapiens OX=9606 GN=C1QA PE=1 SV=2	9.25771	26000	F215923.dat	Q25566_MS19-036_T2_NR16	390	29.4	7	7	8	1070	5	3	4	2	9	0	6	4	8	2	7	8	7	6	7	10	7	9	2	6	2	12	7	9	9	9	10	8	10	10	9	13	12	9	10	9	11	8
PEPD_HUMAN	sp|P12955|PEPD_HUMAN Xaa-Pro dipeptidase OS=Homo sapiens OX=9606 GN=PEPD PE=1 SV=3	5.63715	54513	F215846.dat	Q25532_MS19-036_T2_NR18	253	15.2	7	7	8	349	3	0	0	0	0	0	2	1	4	0	0	6	5	0	2	2	4	5	0	4	1	2	3	3	3	1	4	3	5	5	6	5	6	6	4	5	6	5
APOC4_HUMAN	sp|P55056|APOC4_HUMAN Apolipoprotein C-IV OS=Homo sapiens OX=9606 GN=APOC4 PE=1 SV=1	9.1909	14543	F215874.dat	Q25544_MS19-036_T4_NR8	233	35.4	7	7	8	217	0	0	1	0	0	0	0	0	0	0	0	1	0	0	0	0	0	0	0	0	0	2	5	0	0	0	1	0	0	0	0	0	0	4	2	1	0	1
CO4A_HUMAN	sp|P0C0L4|CO4A_HUMAN Complement C4-A OS=Homo sapiens OX=9606 GN=C4A PE=1 SV=2	6.65509	192664	F215881.dat	Q25549_MS19-036_T4_NR4	7973	70.5	113	6	144	1518	10	5	12	7	17	3	7	19	8	3	12	11	11	9	22	21	18	19	8	8	12	21	14	13	17	18	13	12	16	9	12	14	7	9	11	11	16	9
BIP_HUMAN	sp|P11021|BIP_HUMAN Endoplasmic reticulum chaperone BiP OS=Homo sapiens OX=9606 GN=HSPA5 PE=1 SV=2	5.06515	72288	F215978.dat	Q25580_MS19-036_T4_R16	234	10.9	6	6	12	189	2	1	2	0	4	0	1	0	1	0	1	2	1	0	0	0	2	1	0	1	1	2	2	1	1	3	0	3	1	1	0	1	1	2	2	1	1	0
C1RL_HUMAN	sp|Q9NZP8|C1RL_HUMAN Complement C1r subcomponent-like protein OS=Homo sapiens OX=9606 GN=C1RL PE=1 SV=2	6.75415	53464	F215956.dat	Q25573_MS19-036_T3_NR17	449	16.8	7	6	11	396	1	0	3	0	6	0	0	3	3	0	1	0	2	0	5	4	3	3	1	1	2	5	4	3	2	4	1	3	6	2	1	2	5	1	2	2	4	2
K1C40_HUMAN	sp|Q6A162|K1C40_HUMAN Keratin, type I cytoskeletal 40 OS=Homo sapiens OX=9606 GN=KRT40 PE=1 SV=2	4.35084	48108	F215851.dat	Q25537_MS19-036_T3_R9	446	23.2	9	6	11	10	0	0	0	0	0	0	0	0	0	0	0	0	0	0	0	0	0	0	0	0	0	0	0	0	0	0	0	0	0	0	0	0	0	0	0	0	0	0
MUC5B_HUMAN	sp|Q9HC84|MUC5B_HUMAN Mucin-5B OS=Homo sapiens OX=9606 GN=MUC5B PE=1 SV=3	6.19979	595960	F215812.dat	Q25500_MS19-036_T1(Baseline)_R2	343	1.6	6	6	11	28	0	0	0	0	0	0	0	0	0	0	0	7	0	3	0	0	0	0	0	0	0	0	0	0	0	0	0	0	0	0	0	0	0	0	7	0	0	0
MA1A1_HUMAN	sp|P33908|MA1A1_HUMAN Mannosyl-oligosaccharide 1,2-alpha-mannosidase IA OS=Homo sapiens OX=9606 GN=MAN1A1 PE=1 SV=3	6.03596	72922	F215922.dat	Q25565_MS19-036_T3_NR10	194	8.4	6	6	10	326	0	0	0	0	2	0	0	1	3	0	0	2	2	0	5	6	2	2	0	0	0	3	2	3	3	5	3	2	4	1	3	3	2	3	2	2	1	3
IGHA1_HUMAN	sp|P01876|IGHA1_HUMAN Immunoglobulin heavy constant alpha 1 OS=Homo sapiens OX=9606 GN=IGHA1 PE=1 SV=2	6.07905	37631	F215685.dat	Q25477_MS19-036_T4_NR18	402	23.5	6	6	9	326	0	0	0	0	3	0	6	0	0	0	0	0	16	1	1	1	0	4	0	0	0	1	0	2	1	2	5	0	1	1	0	7	8	2	3	0	0	1
PROZ_HUMAN	sp|P22891|PROZ_HUMAN Vitamin K-dependent protein Z OS=Homo sapiens OX=9606 GN=PROZ PE=1 SV=2	5.6372	44715	F215926.dat	Q25569_MS19-036_T4_NR10	321	24.2	6	6	9	269	0	0	4	0	0	0	0	2	0	0	0	0	0	0	1	3	0	0	1	2	1	3	0	3	1	3	1	1	7	0	2	1	0	1	1	1	1	2
CADH5_HUMAN	sp|P33151|CADH5_HUMAN Cadherin-5 OS=Homo sapiens OX=9606 GN=CDH5 PE=1 SV=5	5.22029	87474	F215984.dat	Q25584_MS19-036_T4_R8	256	8.8	6	6	9	190	0	0	0	0	0	0	0	0	0	0	0	0	1	0	0	0	1	0	0	0	0	0	0	0	0	1	0	1	1	0	0	0	0	0	3	0	3	0
K1C39_HUMAN	sp|Q6A163|K1C39_HUMAN Keratin, type I cytoskeletal 39 OS=Homo sapiens OX=9606 GN=KRT39 PE=1 SV=2	5.19406	55615	F215851.dat	Q25537_MS19-036_T3_R9	245	15.3	6	6	9	12	0	0	0	0	0	0	0	0	0	0	0	0	0	0	0	0	0	0	0	0	0	0	0	0	0	0	0	0	0	0	0	0	0	0	0	0	0	0
LCAT_HUMAN	sp|P04180|LCAT_HUMAN Phosphatidylcholine-sterol acyltransferase OS=Homo sapiens OX=9606 GN=LCAT PE=1 SV=1	5.71443	49546	F215906.dat	Q25561_MS19-036_T4_NR2	319	20	6	6	8	523	0	1	4	1	7	0	2	1	2	0	1	5	1	0	4	3	3	3	3	1	0	5	4	5	2	4	4	4	7	1	2	1	4	2	4	4	5	3
MMRN1_HUMAN	sp|Q13201|MMRN1_HUMAN Multimerin-1 OS=Homo sapiens OX=9606 GN=MMRN1 PE=1 SV=3	8.15118	138023	F215983.dat	Q25583_MS19-036_T4_NR3	184	5	6	6	8	54	0	0	1	1	0	0	0	0	0	0	0	0	0	0	0	0	0	0	0	0	0	0	1	0	0	0	1	0	0	0	0	3	0	0	1	0	0	0
C1QC_HUMAN	sp|P02747|C1QC_HUMAN Complement C1q subcomponent subunit C OS=Homo sapiens OX=9606 GN=C1QC PE=1 SV=3	8.61435	25757	F215828.dat	Q25514_MS19-036_T4_R9	474	23.7	6	6	7	2758	24	15	28	17	16	7	21	15	20	6	20	13	24	15	17	16	18	14	22	16	17	23	25	22	25	24	26	14	16	24	24	29	26	17	14	27	11	18
CXCL7_HUMAN	sp|P02775|CXCL7_HUMAN Platelet basic protein OS=Homo sapiens OX=9606 GN=PPBP PE=1 SV=3	9.04118	13885	F215668.dat	Q25467_MS19-036_T4_R18	428	40.6	6	6	7	737	3	2	13	11	5	1	3	7	5	1	3	5	6	3	4	4	2	5	4	6	5	3	8	3	4	5	4	4	4	6	6	3	4	9	4	6	5	4
CRIS3_HUMAN	sp|P54108|CRIS3_HUMAN Cysteine-rich secretory protein 3 OS=Homo sapiens OX=9606 GN=CRISP3 PE=1 SV=1	8.08539	27612	F215906.dat	Q25561_MS19-036_T4_NR2	298	23.7	6	6	7	179	1	0	1	0	1	0	0	0	1	0	0	0	1	0	1	2	0	2	0	1	0	2	2	1	1	2	3	1	1	1	2	1	0	0	0	0	0	0
KPRP_HUMAN	sp|Q5T749|KPRP_HUMAN Keratinocyte proline-rich protein OS=Homo sapiens OX=9606 GN=KPRP PE=1 SV=1	8.71914	64093	F215685.dat	Q25477_MS19-036_T4_NR18	281	17.6	6	6	7	45	0	0	0	1	0	1	0	0	0	2	1	3	9	0	0	6	0	3	0	0	1	0	0	0	1	0	1	0	0	0	0	0	0	0	1	0	0	0
CETP_HUMAN	sp|P11597|CETP_HUMAN Cholesteryl ester transfer protein OS=Homo sapiens OX=9606 GN=CETP PE=1 SV=2	5.69654	54721	F215906.dat	Q25561_MS19-036_T4_NR2	268	15.6	6	6	7	197	1	1	1	0	1	0	1	0	1	0	0	1	1	0	1	0	1	0	0	1	1	1	1	0	1	1	1	0	0	3	1	1	2	0	2	2	1	0
PLF4_HUMAN	sp|P02776|PLF4_HUMAN Platelet factor 4 OS=Homo sapiens OX=9606 GN=PF4 PE=1 SV=2	8.93133	10838	F215983.dat	Q25583_MS19-036_T4_NR3	359	36.6	6	6	6	550	5	0	5	2	2	0	3	3	4	0	2	2	3	1	2	5	1	2	2	3	3	3	5	2	4	5	3	4	4	6	5	4	4	7	2	4	5	3
GPX3_HUMAN	sp|P22352|GPX3_HUMAN Glutathione peroxidase 3 OS=Homo sapiens OX=9606 GN=GPX3 PE=1 SV=2	8.26481	25536	F215894.dat	Q25552_MS19-036_T3_NR5	306	32.3	6	6	6	1130	3	4	6	8	7	2	6	7	9	0	3	12	9	7	5	5	9	14	6	7	9	8	6	8	6	7	7	13	13	10	13	6	5	9	11	9	13	6
A1AT_HUMAN	sp|P01009|A1AT_HUMAN Alpha-1-antitrypsin OS=Homo sapiens OX=9606 GN=SERPINA1 PE=1 SV=3	5.36709	46707	F215685.dat	Q25477_MS19-036_T4_NR18	297	14.6	6	6	6	23	0	0	0	0	0	0	0	0	0	0	0	0	7	0	0	0	0	0	0	0	0	0	0	1	0	0	0	0	0	0	0	0	0	0	0	0	0	0
FIBB_HUMAN	sp|P02675|FIBB_HUMAN Fibrinogen beta chain OS=Homo sapiens OX=9606 GN=FGB PE=1 SV=2	8.54478	55892	F215824.dat	Q25510_MS19-036_T2_R9	260	19.1	6	6	6	17	0	0	0	0	0	0	0	0	0	0	0	0	0	0	0	2	0	0	0	0	0	0	0	0	0	3	0	0	0	0	0	0	0	0	0	0	0	0
CO4B_HUMAN	sp|P0C0L5|CO4B_HUMAN Complement C4-B OS=Homo sapiens OX=9606 GN=C4B PE=1 SV=2	6.89263	192631	F215757.dat	Q25487_MS19-036_T1(Baseline)_R11	7909	67	116	5	144	1633	13	9	7	13	16	8	9	11	14	3	10	11	9	10	5	19	13	14	5	5	14	20	13	16	14	17	10	9	15	15	14	19	12	13	14	12	18	13
K1C13_HUMAN	sp|P13646|K1C13_HUMAN Keratin, type I cytoskeletal 13 OS=Homo sapiens OX=9606 GN=KRT13 PE=1 SV=4	4.90786	49557	F215818.dat	Q25504_MS19-036_T1(Baseline)_NR10	862	36.9	14	5	19	18	0	0	0	0	0	0	0	0	0	0	0	0	0	0	0	0	0	0	0	0	0	0	0	0	0	0	0	0	0	0	0	0	0	0	0	0	1	0
IGG1_HUMAN	sp|P0DOX5|IGG1_HUMAN Immunoglobulin gamma-1 heavy chain OS=Homo sapiens OX=9606 PE=1 SV=2	8.9393	49298	F215685.dat	Q25477_MS19-036_T4_NR18	735	35.2	13	5	16	69	0	0	0	0	1	0	0	0	1	0	0	1	20	0	0	1	0	0	0	0	0	0	0	1	0	1	3	0	0	0	0	3	1	0	1	0	1	0
FHR2_HUMAN	sp|P36980|FHR2_HUMAN Complement factor H-related protein 2 OS=Homo sapiens OX=9606 GN=CFHR2 PE=1 SV=1	5.99772	30631	F215906.dat	Q25561_MS19-036_T4_NR2	557	45.9	10	5	14	354	4	2	2	1	1	0	2	4	2	0	2	1	4	4	1	3	3	2	2	3	1	4	2	3	5	2	6	1	2	3	7	5	1	5	3	4	2	3
PGBM_HUMAN	sp|P98160|PGBM_HUMAN Basement membrane-specific heparan sulfate proteoglycan core protein OS=Homo sapiens OX=9606 GN=HSPG2 PE=1 SV=4	6.05508	468532	F215947.dat	Q25572_MS19-036_T4_R10	223	1.5	5	5	13	226	0	0	0	0	0	0	0	2	1	0	0	0	2	0	0	0	2	1	0	1	0	2	0	2	1	2	2	3	0	2	2	1	0	2	5	3	3	1
DSG1_HUMAN	sp|Q02413|DSG1_HUMAN Desmoglein-1 OS=Homo sapiens OX=9606 GN=DSG1 PE=1 SV=2	4.90341	113676	F215688.dat	Q25480_MS19-036_T1(Baseline)_R3	220	6.9	5	5	13	42	1	0	0	0	0	3	0	0	0	2	1	3	4	1	0	5	2	3	0	0	0	0	0	0	0	3	0	0	0	0	0	0	0	0	0	0	0	0
AMPN_HUMAN	sp|P15144|AMPN_HUMAN Aminopeptidase N OS=Homo sapiens OX=9606 GN=ANPEP PE=1 SV=4	5.30616	109471	F215895.dat	Q25553_MS19-036_T3_NR16	198	8.5	5	5	13	144	0	0	0	0	2	0	0	0	0	0	0	0	0	0	0	0	0	0	0	0	0	4	1	1	0	1	0	0	1	0	0	3	1	1	3	0	0	0
MASP2_HUMAN	sp|O00187|MASP2_HUMAN Mannan-binding lectin serine protease 2 OS=Homo sapiens OX=9606 GN=MASP2 PE=1 SV=4	5.38621	75654	F215877.dat	Q25547_MS19-036_T3_NR12	269	9.9	5	5	11	358	1	0	1	0	1	0	0	3	2	0	2	3	1	0	1	2	3	2	0	1	0	3	3	2	3	4	2	1	5	4	1	4	4	3	4	1	2	0
PLSL_HUMAN	sp|P13796|PLSL_HUMAN Plastin-2 OS=Homo sapiens OX=9606 GN=LCP1 PE=1 SV=6	5.29021	70244	F215830.dat	Q25516_MS19-036_T1(Baseline)_NR7	196	8.8	5	5	11	174	0	0	0	0	2	0	0	3	1	0	0	0	2	0	2	0	4	0	0	2	0	1	1	1	1	1	1	2	1	1	0	1	3	0	1	2	2	1
IBP3_HUMAN	sp|P17936|IBP3_HUMAN Insulin-like growth factor-binding protein 3 OS=Homo sapiens OX=9606 GN=IGFBP3 PE=1 SV=2	9.02819	31654	F215897.dat	Q25555_MS19-036_T2_NR14	170	22.7	5	5	11	245	1	0	0	0	1	0	0	2	2	0	0	2	1	0	2	0	1	3	0	0	0	3	0	0	4	1	4	2	1	2	1	2	1	0	2	1	2	1
HSP7C_HUMAN	sp|P11142|HSP7C_HUMAN Heat shock cognate 71 kDa protein OS=Homo sapiens OX=9606 GN=HSPA8 PE=1 SV=1	5.37471	70854	F215851.dat	Q25537_MS19-036_T3_R9	216	12.1	6	5	9	15	0	1	0	0	0	0	0	0	0	0	0	0	0	0	0	0	0	0	0	0	0	0	0	0	0	0	0	0	0	0	0	0	0	0	0	0	0	0
PLTP_HUMAN	sp|P55058|PLTP_HUMAN Phospholipid transfer protein OS=Homo sapiens OX=9606 GN=PLTP PE=1 SV=1	6.53251	54705	F215925.dat	Q25568_MS19-036_T4_NR6	233	20.5	5	5	8	303	0	1	1	0	4	0	0	3	0	0	0	1	0	0	1	2	0	1	0	2	0	4	4	1	0	0	4	2	3	3	0	1	2	1	6	2	2	0
PI16_HUMAN	sp|Q6UXB8|PI16_HUMAN Peptidase inhibitor 16 OS=Homo sapiens OX=9606 GN=PI16 PE=1 SV=1	5.23721	49440	F215983.dat	Q25583_MS19-036_T4_NR3	220	12.1	5	5	8	381	0	1	0	0	7	0	3	4	3	0	1	2	1	1	2	3	3	5	0	1	0	6	0	4	3	4	3	8	1	4	3	1	1	4	4	0	4	2
SPRC_HUMAN	sp|P09486|SPRC_HUMAN SPARC OS=Homo sapiens OX=9606 GN=SPARC PE=1 SV=1	4.7335	34610	F215980.dat	Q25581_MS19-036_T4_NR5	255	21.5	5	5	7	384	0	0	1	0	5	0	0	1	4	0	0	0	1	0	5	5	0	1	1	1	1	3	6	2	5	5	6	3	4	3	4	4	0	2	2	1	2	1
GGH_HUMAN	sp|Q92820|GGH_HUMAN Gamma-glutamyl hydrolase OS=Homo sapiens OX=9606 GN=GGH PE=1 SV=2	6.66245	35941	F215862.dat	Q25539_MS19-036_T1(Baseline)_R1	245	14.8	5	5	7	172	0	0	0	0	4	0	0	0	0	0	0	0	0	0	0	3	2	0	1	0	0	1	1	0	1	3	2	0	3	1	1	4	0	1	1	2	1	2
APOC2_HUMAN	sp|P02655|APOC2_HUMAN Apolipoprotein C-II OS=Homo sapiens OX=9606 GN=APOC2 PE=1 SV=1	4.7219	11277	F215969.dat	Q25575_MS19-036_T4_R2	401	45.5	5	5	6	386	2	0	3	4	4	0	0	1	1	0	0	6	1	0	0	1	3	1	1	0	0	5	7	3	3	3	1	2	2	1	2	2	4	4	4	2	3	1
VASN_HUMAN	sp|Q6EMK4|VASN_HUMAN Vasorin OS=Homo sapiens OX=9606 GN=VASN PE=1 SV=1	7.16084	71668	F215777.dat	Q25493_MS19-036_T1(Baseline)_NR11	268	12.8	5	5	6	331	1	3	1	0	4	0	3	3	2	0	2	3	6	3	5	4	3	2	0	5	1	2	2	2	2	5	2	7	5	5	4	3	3	0	3	8	6	5
CFAD_HUMAN	sp|P00746|CFAD_HUMAN Complement factor D OS=Homo sapiens OX=9606 GN=CFD PE=1 SV=5	7.6464	27016	F215875.dat	Q25545_MS19-036_T3_NR13	210	26.1	5	5	6	278	2	1	3	0	2	0	0	0	2	0	1	1	2	1	1	1	1	1	2	0	0	4	4	0	1	3	3	1	1	2	4	3	2	0	0	3	2	0
H4_HUMAN	sp|P62805|H4_HUMAN Histone H4 OS=Homo sapiens OX=9606 GN=HIST1H4A PE=1 SV=2	11.3629	11360	F215921.dat	Q25564_MS19-036_T4_R6	166	46.6	5	5	6	22	0	0	0	0	0	0	0	0	0	0	0	0	0	0	0	0	0	0	0	0	1	0	0	0	0	0	0	0	0	0	0	0	0	0	0	0	0	0
IGD_HUMAN	sp|P0DOX3|IGD_HUMAN Immunoglobulin delta heavy chain OS=Homo sapiens OX=9606 PE=1 SV=1	8.2574	56189	F215978.dat	Q25580_MS19-036_T4_R16	276	14.1	5	5	5	71	0	1	3	0	0	0	2	1	0	0	0	0	0	0	0	1	0	0	0	0	0	3	0	0	0	1	2	1	0	0	0	1	0	0	0	0	0	0
IL1AP_HUMAN	sp|Q9NPH3|IL1AP_HUMAN Interleukin-1 receptor accessory protein OS=Homo sapiens OX=9606 GN=IL1RAP PE=1 SV=2	8.37374	65377	F215925.dat	Q25568_MS19-036_T4_NR6	167	6	5	5	5	121	0	0	1	0	0	0	1	0	1	0	0	0	0	0	1	1	0	1	0	0	0	1	1	0	1	0	1	1	0	2	0	0	0	0	2	2	1	0
K2C78_HUMAN	sp|Q8N1N4|K2C78_HUMAN Keratin, type II cytoskeletal 78 OS=Homo sapiens OX=9606 GN=KRT78 PE=1 SV=2	5.79029	56830	F215868.dat	Q25541_MS19-036_T1(Baseline)_NR3	339	13.1	7	4	18	38	1	1	0	1	0	4	0	0	0	1	1	1	1	1	0	1	1	0	0	0	0	0	0	0	0	0	0	0	0	0	0	1	0	0	2	0	0	0
KRT36_HUMAN	sp|O76013|KRT36_HUMAN Keratin, type I cuticular Ha6 OS=Homo sapiens OX=9606 GN=KRT36 PE=2 SV=1	4.89897	52214	F215691.dat	Q25482_MS19-036_T1(Baseline)_NR2	322	9.4	7	4	15	4	0	0	0	0	0	0	0	0	0	0	0	0	0	0	0	0	0	4	0	0	0	0	0	0	0	0	0	0	0	0	0	0	0	0	0	0	0	0
DPP4_HUMAN	sp|P27487|DPP4_HUMAN Dipeptidyl peptidase 4 OS=Homo sapiens OX=9606 GN=DPP4 PE=1 SV=2	5.67334	88222	F215978.dat	Q25580_MS19-036_T4_R16	176	5.6	4	4	9	105	0	0	1	0	0	0	1	0	0	0	0	0	3	0	1	0	1	2	0	0	0	2	0	0	1	1	1	1	1	0	0	2	0	0	1	1	1	0
ENOA_HUMAN	sp|P06733|ENOA_HUMAN Alpha-enolase OS=Homo sapiens OX=9606 GN=ENO1 PE=1 SV=2	7.01178	47139	F215666.dat	Q25465_MS19-036_T2_NR17	156	19.4	4	4	9	16	5	3	1	0	0	2	0	0	0	1	0	0	0	0	0	0	0	0	0	0	0	0	0	0	0	0	0	0	0	0	0	0	0	0	0	0	0	0
ATS13_HUMAN	sp|Q76LX8|ATS13_HUMAN A disintegrin and metalloproteinase with thrombospondin motifs 13 OS=Homo sapiens OX=9606 GN=ADAMTS13 PE=1 SV=1	6.95877	153505	F215881.dat	Q25549_MS19-036_T4_NR4	115	3.4	4	4	9	75	0	0	0	0	1	0	0	2	0	0	0	0	0	0	0	0	0	0	0	1	0	2	0	0	1	0	1	0	0	0	0	0	0	0	4	0	1	0
G3P_HUMAN	sp|P04406|G3P_HUMAN Glyceraldehyde-3-phosphate dehydrogenase OS=Homo sapiens OX=9606 GN=GAPDH PE=1 SV=3	8.5661	36030	F215666.dat	Q25465_MS19-036_T2_NR17	235	13.7	4	4	7	31	6	0	1	0	0	2	0	0	0	1	1	0	1	0	0	1	0	1	0	0	1	0	1	1	0	0	0	0	0	0	1	0	0	0	0	0	0	0
CATA_HUMAN	sp|P04040|CATA_HUMAN Catalase OS=Homo sapiens OX=9606 GN=CAT PE=1 SV=3	6.89759	59719	F215843.dat	Q25529_MS19-036_T1(Baseline)_NR4	201	6.3	4	4	7	165	6	1	0	0	1	0	2	4	2	0	1	2	1	0	1	3	1	1	0	1	1	4	0	1	0	0	1	2	3	4	0	2	4	0	3	0	1	1
LDHB_HUMAN	sp|P07195|LDHB_HUMAN L-lactate dehydrogenase B chain OS=Homo sapiens OX=9606 GN=LDHB PE=1 SV=2	5.71121	36615	F215885.dat	Q25550_MS19-036_T3_NR4	302	17.7	5	4	6	96	2	0	0	0	0	0	0	0	0	0	0	0	0	0	0	0	0	0	0	0	0	1	1	0	0	0	0	0	2	0	0	0	0	0	0	0	1	0
VNN1_HUMAN	sp|O95497|VNN1_HUMAN Pantetheinase OS=Homo sapiens OX=9606 GN=VNN1 PE=1 SV=2	5.32175	56975	F215924.dat	Q25567_MS19-036_T4_R14	282	11.7	4	4	6	85	0	0	0	0	1	0	0	0	0	0	0	0	0	0	0	0	0	0	0	0	0	1	1	0	0	0	0	0	2	0	0	1	1	1	1	0	0	0
PKP1_HUMAN	sp|Q13835|PKP1_HUMAN Plakophilin-1 OS=Homo sapiens OX=9606 GN=PKP1 PE=1 SV=2	9.29359	82808	F215921.dat	Q25564_MS19-036_T4_R6	141	6.8	4	4	6	9	0	0	0	0	0	0	0	0	0	0	0	0	1	0	0	0	0	0	0	0	0	0	0	0	0	0	0	0	0	0	0	0	0	0	0	0	0	0
LRC15_HUMAN	sp|Q8TF66|LRC15_HUMAN Leucine-rich repeat-containing protein 15 OS=Homo sapiens OX=9606 GN=LRRC15 PE=2 SV=2	6.23757	64325	F215921.dat	Q25564_MS19-036_T4_R6	114	8.4	4	4	6	9	0	0	0	0	0	0	0	0	0	0	0	0	0	0	0	0	0	0	0	0	0	0	0	0	0	0	0	0	0	0	0	0	0	0	0	0	0	0
APOC3_HUMAN	sp|P02656|APOC3_HUMAN Apolipoprotein C-III OS=Homo sapiens OX=9606 GN=APOC3 PE=1 SV=1	5.22933	10845	F215873.dat	Q25543_MS19-036_T3_NR11	373	39.4	4	4	5	919	7	5	10	12	7	4	5	3	6	0	4	11	6	5	6	6	8	5	8	5	6	10	13	7	7	4	7	5	6	6	5	5	8	11	13	6	8	6
ADIPO_HUMAN	sp|Q15848|ADIPO_HUMAN Adiponectin OS=Homo sapiens OX=9606 GN=ADIPOQ PE=1 SV=1	5.42486	26397	F215895.dat	Q25553_MS19-036_T3_NR16	370	29.5	4	4	5	579	2	1	3	1	4	0	3	4	6	0	2	0	8	2	2	7	6	7	1	0	2	6	3	2	1	7	1	5	5	10	4	3	5	5	2	6	6	5
MBL2_HUMAN	sp|P11226|MBL2_HUMAN Mannose-binding protein C OS=Homo sapiens OX=9606 GN=MBL2 PE=1 SV=2	5.39296	26127	F215980.dat	Q25581_MS19-036_T4_NR5	268	22.2	4	4	5	193	2	0	2	1	2	0	1	2	0	0	2	0	3	2	1	2	0	3	2	2	1	1	2	1	2	1	2	1	2	1	1	1	1	0	0	4	1	0
APOC1_HUMAN	sp|P02654|APOC1_HUMAN Apolipoprotein C-I OS=Homo sapiens OX=9606 GN=APOC1 PE=1 SV=1	8.0103	9326	F215668.dat	Q25467_MS19-036_T4_R18	210	37.3	4	4	5	267	0	0	6	1	1	0	0	0	0	0	0	1	1	0	0	1	2	1	0	1	0	5	2	5	0	2	0	2	2	1	1	1	1	4	1	3	1	1
CALL3_HUMAN	sp|P27482|CALL3_HUMAN Calmodulin-like protein 3 OS=Homo sapiens OX=9606 GN=CALML3 PE=1 SV=2	4.29793	16880	F215851.dat	Q25537_MS19-036_T3_R9	206	47	4	4	5	7	0	0	0	0	0	0	0	0	0	0	0	0	0	0	0	0	0	0	0	0	0	0	0	0	0	0	0	0	0	0	0	0	0	0	0	0	0	0
SPA11_HUMAN	sp|Q86U17|SPA11_HUMAN Serpin A11 OS=Homo sapiens OX=9606 GN=SERPINA11 PE=2 SV=2	7.25239	46959	F215947.dat	Q25572_MS19-036_T4_R10	113	12.1	4	4	5	18	0	0	0	0	0	0	0	0	0	0	0	0	0	0	0	0	0	0	0	0	0	0	0	0	0	0	0	0	0	0	0	0	0	0	0	0	0	0
1A24_HUMAN	sp|P05534|1A24_HUMAN HLA class I histocompatibility antigen, A-24 alpha chain OS=Homo sapiens OX=9606 GN=HLA-A PE=1 SV=2	5.90653	40663	F215926.dat	Q25569_MS19-036_T4_NR10	207	19.5	4	4	4	3	0	0	0	0	0	0	0	0	0	0	0	0	0	0	0	0	0	0	0	0	0	0	0	0	0	0	0	0	0	0	0	0	0	0	0	0	0	0
KR10B_HUMAN	sp|P60412|KR10B_HUMAN Keratin-associated protein 10-11 OS=Homo sapiens OX=9606 GN=KRTAP10-11 PE=1 SV=3	7.92887	30220	F215851.dat	Q25537_MS19-036_T3_R9	183	16.1	4	4	4	13	0	0	0	0	0	0	0	0	0	0	0	0	0	0	0	0	0	0	0	0	0	0	0	0	0	0	0	0	0	0	0	0	0	0	0	0	0	0
DSG4_HUMAN	sp|Q86SJ6|DSG4_HUMAN Desmoglein-4 OS=Homo sapiens OX=9606 GN=DSG4 PE=1 SV=1	4.42143	113751	F215851.dat	Q25537_MS19-036_T3_R9	179	3.9	4	4	4	6	0	0	0	0	0	0	0	0	0	0	0	0	0	0	0	0	0	0	0	0	0	0	0	0	0	0	0	0	0	0	0	0	0	0	0	0	0	0
PERM_HUMAN	sp|P05164|PERM_HUMAN Myeloperoxidase OS=Homo sapiens OX=9606 GN=MPO PE=1 SV=1	9.19391	83815	F215924.dat	Q25567_MS19-036_T4_R14	170	5.4	4	4	4	41	0	0	0	0	0	0	0	0	0	0	0	0	0	0	0	0	0	0	0	0	0	0	0	1	0	0	1	0	0	1	0	1	0	0	0	0	0	1
TIMP1_HUMAN	sp|P01033|TIMP1_HUMAN Metalloproteinase inhibitor 1 OS=Homo sapiens OX=9606 GN=TIMP1 PE=1 SV=1	8.45527	23156	F215902.dat	Q25559_MS19-036_T4_NR7	163	26.1	4	4	4	100	0	0	1	0	0	0	0	0	1	0	0	0	0	0	0	0	0	0	1	0	0	0	2	0	1	0	0	0	0	2	0	1	0	0	0	0	0	0
SBP1_HUMAN	sp|Q13228|SBP1_HUMAN Methanethiol oxidase OS=Homo sapiens OX=9606 GN=SELENBP1 PE=1 SV=2	5.93102	52358	F215975.dat	Q25578_MS19-036_T3_NR14	115	8.7	4	4	4	5	0	0	0	0	0	0	0	0	0	0	0	0	0	0	0	0	0	0	0	0	0	0	0	0	0	0	0	0	0	0	0	0	0	0	0	0	0	0
AMPL_HUMAN	sp|P28838|AMPL_HUMAN Cytosol aminopeptidase OS=Homo sapiens OX=9606 GN=LAP3 PE=1 SV=3	8.02978	56131	F215851.dat	Q25537_MS19-036_T3_R9	108	8.3	4	4	4	130	2	0	1	1	2	0	2	1	2	0	1	2	2	2	1	2	2	2	1	2	1	2	2	1	2	2	3	1	1	0	2	1	0	2	2	0	2	2
FHR1_HUMAN	sp|Q03591|FHR1_HUMAN Complement factor H-related protein 1 OS=Homo sapiens OX=9606 GN=CFHR1 PE=1 SV=2	7.38575	37626	F215878.dat	Q25548_MS19-036_T4_NR9	1071	68.8	17	3	19	995	7	0	7	6	4	1	9	0	15	0	7	4	9	8	11	10	4	10	8	9	3	0	7	13	10	13	17	3	12	14	10	13	0	11	3	5	3	7
KRT38_HUMAN	sp|O76015|KRT38_HUMAN Keratin, type I cuticular Ha8 OS=Homo sapiens OX=9606 GN=KRT38 PE=1 SV=3	4.78544	50447	F215896.dat	Q25554_MS19-036_T3_NR8	349	17.3	6	3	13	4	0	0	0	0	0	0	0	0	0	0	0	0	0	0	0	0	0	0	0	0	0	0	0	0	0	0	0	0	0	0	0	0	0	0	0	0	0	0
IGHG2_HUMAN	sp|P01859|IGHG2_HUMAN Immunoglobulin heavy constant gamma 2 OS=Homo sapiens OX=9606 GN=IGHG2 PE=1 SV=2	7.66097	35878	F215685.dat	Q25477_MS19-036_T4_NR18	429	29.1	8	3	10	7	0	0	0	0	0	0	0	0	0	0	0	0	7	0	0	0	0	0	0	0	0	0	0	0	0	0	0	0	0	0	0	0	0	0	0	0	0	0
SAA1_HUMAN	sp|P0DJI8|SAA1_HUMAN Serum amyloid A-1 protein OS=Homo sapiens OX=9606 GN=SAA1 PE=1 SV=1	6.27744	13524	F215842.dat	Q25528_MS19-036_T1(Baseline)_R4	443	65.6	6	3	7	44	0	0	0	0	0	0	0	1	0	0	0	0	0	0	0	4	0	0	0	0	0	0	0	1	0	0	0	0	0	0	0	0	0	0	0	0	0	0
TSP4_HUMAN	sp|P35443|TSP4_HUMAN Thrombospondin-4 OS=Homo sapiens OX=9606 GN=THBS4 PE=1 SV=2	4.43779	105802	F215926.dat	Q25569_MS19-036_T4_NR10	154	5.2	4	3	7	39	0	0	0	0	0	0	0	1	0	0	0	0	1	0	0	1	0	0	0	1	0	0	0	0	0	2	0	0	0	0	1	0	0	0	0	0	0	0
NCAM1_HUMAN	sp|P13591|NCAM1_HUMAN Neural cell adhesion molecule 1 OS=Homo sapiens OX=9606 GN=NCAM1 PE=1 SV=3	4.78983	94515	F215881.dat	Q25549_MS19-036_T4_NR4	133	5.4	3	3	7	55	0	1	0	0	0	0	0	0	0	0	0	0	0	0	0	0	0	0	0	0	0	0	0	0	0	0	0	0	0	0	0	0	1	0	0	0	0	0
CO6A3_HUMAN	sp|P12111|CO6A3_HUMAN Collagen alpha-3(VI) chain OS=Homo sapiens OX=9606 GN=COL6A3 PE=1 SV=5	6.26471	343457	F215777.dat	Q25493_MS19-036_T1(Baseline)_NR11	92	0.9	3	3	7	48	0	0	0	0	2	0	0	1	0	0	0	0	0	0	1	0	1	2	0	0	0	1	0	0	1	1	1	3	0	1	0	0	0	0	0	2	3	0
LYSC_HUMAN	sp|P61626|LYSC_HUMAN Lysozyme C OS=Homo sapiens OX=9606 GN=LYZ PE=1 SV=1	9.38039	16526	F215978.dat	Q25580_MS19-036_T4_R16	198	31.8	3	3	6	208	1	0	1	0	2	0	1	1	0	0	0	1	0	0	0	3	0	1	0	1	2	2	1	2	2	2	1	2	1	3	3	2	2	3	1	0	2	2
MINP1_HUMAN	sp|Q9UNW1|MINP1_HUMAN Multiple inositol polyphosphate phosphatase 1 OS=Homo sapiens OX=9606 GN=MINPP1 PE=1 SV=1	7.92657	55016	F215783.dat	Q25494_MS19-036_T1(Baseline)_R13	103	6.8	3	3	6	130	0	0	0	0	1	0	0	1	2	0	0	0	0	0	2	1	1	1	0	0	0	1	2	1	2	0	2	0	3	0	1	1	2	1	2	0	1	1
F13A_HUMAN	sp|P00488|F13A_HUMAN Coagulation factor XIII A chain OS=Homo sapiens OX=9606 GN=F13A1 PE=1 SV=4	5.74771	83215	F215823.dat	Q25509_MS19-036_T2_R2	136	5.2	3	3	5	53	0	0	0	0	0	0	0	0	0	0	0	1	0	0	0	0	0	0	0	0	0	0	0	2	0	0	0	0	0	0	0	0	0	2	0	1	1	1
TGM3_HUMAN	sp|Q08188|TGM3_HUMAN Protein-glutamine gamma-glutamyltransferase E OS=Homo sapiens OX=9606 GN=TGM3 PE=1 SV=4	5.62074	76584	F215921.dat	Q25564_MS19-036_T4_R6	110	3.8	3	3	5	8	0	0	0	0	0	0	0	0	0	0	0	0	0	0	0	0	0	0	0	0	0	0	0	0	0	0	0	0	0	0	0	0	0	0	0	0	0	0
PCSK9_HUMAN	sp|Q8NBP7|PCSK9_HUMAN Proprotein convertase subtilisin/kexin type 9 OS=Homo sapiens OX=9606 GN=PCSK9 PE=1 SV=3	6.14162	74239	F215862.dat	Q25539_MS19-036_T1(Baseline)_R1	105	6.5	3	3	5	90	1	0	1	0	0	0	1	0	0	0	0	0	0	0	0	1	0	0	0	0	0	0	0	3	0	0	0	0	1	2	0	2	1	0	1	0	2	0
FLNA_HUMAN	sp|P21333|FLNA_HUMAN Filamin-A OS=Homo sapiens OX=9606 GN=FLNA PE=1 SV=4	5.70482	280564	F215819.dat	Q25505_MS19-036_T2_R6	82	1.5	3	3	5	7	0	0	0	0	0	0	0	0	0	0	0	0	0	0	0	0	0	0	0	0	0	0	0	0	0	0	0	0	0	0	0	0	0	0	0	0	0	0
1433S_HUMAN	sp|P31947|1433S_HUMAN 14-3-3 protein sigma OS=Homo sapiens OX=9606 GN=SFN PE=1 SV=1	4.67998	27757	F215975.dat	Q25578_MS19-036_T3_NR14	78	12.9	3	3	5	4	0	0	0	0	0	0	0	0	0	0	0	0	0	0	0	0	0	0	0	0	0	0	0	0	0	0	0	0	0	0	0	0	0	0	0	0	0	0
HBG2_HUMAN	sp|P69892|HBG2_HUMAN Hemoglobin subunit gamma-2 OS=Homo sapiens OX=9606 GN=HBG2 PE=1 SV=2	6.64487	16116	F215885.dat	Q25550_MS19-036_T3_NR4	217	36.7	4	3	4	2	0	0	0	0	0	0	0	0	0	0	0	0	0	0	0	0	0	0	0	0	0	0	0	0	0	0	0	0	0	0	0	0	0	0	0	0	0	0
AMYP_HUMAN	sp|P04746|AMYP_HUMAN Pancreatic alpha-amylase OS=Homo sapiens OX=9606 GN=AMY2A PE=1 SV=2	6.60162	57670	F215686.dat	Q25478_MS19-036_T3_NR2	196	7.2	3	3	4	19	0	0	0	0	1	0	0	0	0	0	0	0	0	5	0	0	0	0	0	0	0	1	0	0	1	1	0	0	0	0	1	1	0	0	0	0	0	0
FILA2_HUMAN	sp|Q5D862|FILA2_HUMAN Filaggrin-2 OS=Homo sapiens OX=9606 GN=FLG2 PE=1 SV=1	8.44929	247928	F215761.dat	Q25491_MS19-036_T2_R3	186	1.7	3	3	4	55	1	1	1	1	0	1	1	0	1	1	1	1	3	1	0	1	1	1	1	0	0	0	0	0	1	4	1	1	0	0	0	1	0	0	1	0	1	1
LYVE1_HUMAN	sp|Q9Y5Y7|LYVE1_HUMAN Lymphatic vessel endothelial hyaluronic acid receptor 1 OS=Homo sapiens OX=9606 GN=LYVE1 PE=1 SV=2	8.59319	35191	F215875.dat	Q25545_MS19-036_T3_NR13	165	8.4	3	3	4	295	0	1	0	0	3	0	1	2	2	0	0	0	3	0	3	4	5	4	0	1	4	4	1	1	1	2	3	4	2	4	0	2	2	3	1	4	5	0
TRY1_HUMAN	sp|P07477|TRY1_HUMAN Trypsin-1 OS=Homo sapiens OX=9606 GN=PRSS1 PE=1 SV=1	6.07742	26541	F215671.dat	Q25470_MS19-036_T1(Baseline)_NR17	148	15.4	3	3	4	45	3	1	2	2	0	2	2	1	1	1	1	3	2	2	1	1	1	0	1	0	2	0	1	0	0	0	0	0	1	0	0	0	0	0	0	0	1	0
PPIA_HUMAN	sp|P62937|PPIA_HUMAN Peptidyl-prolyl cis-trans isomerase A OS=Homo sapiens OX=9606 GN=PPIA PE=1 SV=2	7.68157	18001	F215666.dat	Q25465_MS19-036_T2_NR17	136	21.8	3	3	4	65	4	3	3	3	0	1	2	0	0	1	1	0	0	2	1	0	2	1	2	1	2	1	3	2	1	0	0	0	1	0	1	1	0	0	0	0	1	0
ANXA2_HUMAN	sp|P07355|ANXA2_HUMAN Annexin A2 OS=Homo sapiens OX=9606 GN=ANXA2 PE=1 SV=2	7.57432	38580	F215688.dat	Q25480_MS19-036_T1(Baseline)_R3	118	10.3	3	3	4	33	1	0	1	0	0	0	1	0	0	1	0	1	1	0	1	3	2	2	0	0	1	0	1	0	1	0	0	0	0	1	1	1	0	0	1	0	1	1
LIRA3_HUMAN	sp|Q8N6C8|LIRA3_HUMAN Leukocyte immunoglobulin-like receptor subfamily A member 3 OS=Homo sapiens OX=9606 GN=LILRA3 PE=1 SV=3	8.37052	47442	F215983.dat	Q25583_MS19-036_T4_NR3	98	10	3	3	4	9	0	0	0	0	0	0	0	0	0	0	0	0	0	0	0	0	0	0	0	0	0	0	0	0	0	0	0	0	0	0	0	0	0	0	0	0	0	0
CAH2_HUMAN	sp|P00918|CAH2_HUMAN Carbonic anhydrase 2 OS=Homo sapiens OX=9606 GN=CA2 PE=1 SV=2	6.86753	29228	F215828.dat	Q25514_MS19-036_T4_R9	90	13.5	3	3	4	37	0	0	0	0	0	0	1	0	0	0	0	0	0	0	0	0	0	0	0	0	0	0	0	0	0	0	0	0	0	0	0	0	1	0	2	0	0	1
SCGR1_HUMAN	sp|A0A286YEY9|SCGR1_HUMAN Small cysteine and glycine repeat-containing protein 1 OS=Homo sapiens OX=9606 GN=SCYGR1 PE=1 SV=1	8.46396	8600	F215851.dat	Q25537_MS19-036_T3_R9	228	33	3	3	3	12	0	0	0	0	0	0	0	0	0	0	0	0	0	0	0	0	0	0	0	0	0	0	0	0	0	0	0	0	0	0	0	0	0	0	0	0	0	0
LYG2_HUMAN	sp|Q86SG7|LYG2_HUMAN Lysozyme g-like protein 2 OS=Homo sapiens OX=9606 GN=LYG2 PE=1 SV=2	9.03049	23483	F215851.dat	Q25537_MS19-036_T3_R9	204	22.6	3	3	3	3	0	0	0	0	0	0	0	0	0	0	0	0	0	0	0	0	0	0	0	0	0	0	0	0	0	0	0	0	0	0	0	0	0	0	0	0	0	0
S10A3_HUMAN	sp|P33764|S10A3_HUMAN Protein S100-A3 OS=Homo sapiens OX=9606 GN=S100A3 PE=1 SV=1	4.7083	11705	F215851.dat	Q25537_MS19-036_T3_R9	198	45.5	3	3	3	10	0	0	0	0	0	0	0	0	0	0	0	0	0	0	0	0	0	0	0	0	0	0	0	0	0	0	0	0	0	0	0	0	0	0	0	0	0	0
TBA1B_HUMAN	sp|P68363|TBA1B_HUMAN Tubulin alpha-1B chain OS=Homo sapiens OX=9606 GN=TUBA1B PE=1 SV=1	4.94288	50120	F215921.dat	Q25564_MS19-036_T4_R6	177	8.9	3	3	3	41	2	1	1	1	0	1	1	0	0	1	2	2	1	2	1	0	0	2	1	1	1	2	2	0	1	0	2	0	0	1	0	2	0	0	0	0	2	0
ANAG_HUMAN	sp|P54802|ANAG_HUMAN Alpha-N-acetylglucosaminidase OS=Homo sapiens OX=9606 GN=NAGLU PE=1 SV=2	6.19989	82214	F215842.dat	Q25528_MS19-036_T1(Baseline)_R4	168	6.5	3	3	3	16	0	0	0	0	0	0	0	0	0	0	0	0	0	0	0	0	1	0	0	1	0	0	2	0	0	0	0	1	0	0	0	0	0	0	0	0	0	0
SPP24_HUMAN	sp|Q13103|SPP24_HUMAN Secreted phosphoprotein 24 OS=Homo sapiens OX=9606 GN=SPP2 PE=1 SV=1	8.58787	24322	F215874.dat	Q25544_MS19-036_T4_NR8	162	16.1	3	3	3	37	0	0	0	0	0	0	0	0	0	0	0	0	0	0	0	0	0	0	0	0	0	1	0	0	0	0	0	0	0	0	0	0	0	0	0	0	0	0
KRA31_HUMAN	sp|Q9BYR8|KRA31_HUMAN Keratin-associated protein 3-1 OS=Homo sapiens OX=9606 GN=KRTAP3-1 PE=1 SV=1	5.9919	10532	F215921.dat	Q25564_MS19-036_T4_R6	153	27.6	3	3	3	18	0	0	0	0	0	0	0	0	0	0	0	0	0	0	0	0	0	0	0	0	0	0	0	0	0	0	0	0	0	0	0	0	0	0	0	0	0	0
KR111_HUMAN	sp|Q8IUC1|KR111_HUMAN Keratin-associated protein 11-1 OS=Homo sapiens OX=9606 GN=KRTAP11-1 PE=2 SV=1	8.32155	17074	F215921.dat	Q25564_MS19-036_T4_R6	152	21.5	3	3	3	20	0	0	0	0	0	0	0	0	0	0	0	0	0	0	0	0	0	0	0	0	0	0	0	0	0	0	0	0	0	0	0	0	0	0	0	0	0	0
APOF_HUMAN	sp|Q13790|APOF_HUMAN Apolipoprotein F OS=Homo sapiens OX=9606 GN=APOF PE=1 SV=2	5.42067	35377	F215925.dat	Q25568_MS19-036_T4_NR6	151	11.7	3	3	3	89	0	0	4	0	0	0	0	0	0	0	0	0	0	0	0	0	1	0	1	0	0	0	3	0	0	1	0	0	0	0	0	0	1	0	0	0	0	1
KR241_HUMAN	sp|Q3LI83|KR241_HUMAN Keratin-associated protein 24-1 OS=Homo sapiens OX=9606 GN=KRTAP24-1 PE=2 SV=1	8.71045	27701	F215851.dat	Q25537_MS19-036_T3_R9	141	12.6	3	3	3	4	0	0	0	0	0	0	0	0	0	0	0	0	0	0	0	0	0	0	0	0	0	0	0	0	0	0	0	0	0	0	0	0	0	0	0	0	0	0
NGAL_HUMAN	sp|P80188|NGAL_HUMAN Neutrophil gelatinase-associated lipocalin OS=Homo sapiens OX=9606 GN=LCN2 PE=1 SV=2	9.02088	22574	F215924.dat	Q25567_MS19-036_T4_R14	138	22.2	3	3	3	11	0	0	0	0	0	0	0	0	0	0	0	0	0	0	0	0	0	0	0	0	0	0	0	0	0	0	0	0	0	0	0	0	0	0	0	0	0	0
PCOC1_HUMAN	sp|Q15113|PCOC1_HUMAN Procollagen C-endopeptidase enhancer 1 OS=Homo sapiens OX=9606 GN=PCOLCE PE=1 SV=2	7.40886	47942	F215926.dat	Q25569_MS19-036_T4_NR10	137	10	3	3	3	120	1	0	0	0	1	0	0	1	0	0	0	0	1	0	0	1	1	1	0	0	1	1	1	1	0	1	1	1	1	1	1	1	2	0	0	1	1	1
DHE3_HUMAN	sp|P00367|DHE3_HUMAN Glutamate dehydrogenase 1, mitochondrial OS=Homo sapiens OX=9606 GN=GLUD1 PE=1 SV=2	7.66317	61359	F215875.dat	Q25545_MS19-036_T3_NR13	132	4.1	3	3	3	69	0	1	1	0	0	0	0	0	0	0	0	0	0	0	0	0	2	0	0	0	0	0	0	0	0	0	0	0	0	0	0	0	0	0	0	0	0	0
ICAM1_HUMAN	sp|P05362|ICAM1_HUMAN Intercellular adhesion molecule 1 OS=Homo sapiens OX=9606 GN=ICAM1 PE=1 SV=2	8.30923	57789	F215902.dat	Q25559_MS19-036_T4_NR7	123	7.3	3	3	3	29	0	0	0	0	0	0	0	0	0	0	0	0	0	0	0	0	0	0	0	0	0	0	0	0	0	0	0	0	0	0	0	0	0	0	0	0	0	0
TFR1_HUMAN	sp|P02786|TFR1_HUMAN Transferrin receptor protein 1 OS=Homo sapiens OX=9606 GN=TFRC PE=1 SV=2	6.18333	84818	F215983.dat	Q25583_MS19-036_T4_NR3	122	5	3	3	3	8	1	0	0	0	0	0	0	0	0	0	0	0	0	0	0	0	0	0	0	0	0	0	0	0	0	0	0	0	0	0	0	0	0	1	0	0	0	0
S10A9_HUMAN	sp|P06702|S10A9_HUMAN Protein S100-A9 OS=Homo sapiens OX=9606 GN=S100A9 PE=1 SV=1	5.71316	13234	F215924.dat	Q25567_MS19-036_T4_R14	118	31.6	3	3	3	16	0	0	0	0	0	0	0	0	0	0	0	0	0	0	0	0	0	1	0	0	0	0	0	1	0	0	0	0	0	0	0	0	0	0	0	0	0	0
ALDOA_HUMAN	sp|P04075|ALDOA_HUMAN Fructose-bisphosphate aldolase A OS=Homo sapiens OX=9606 GN=ALDOA PE=1 SV=2	8.29957	39395	F215691.dat	Q25482_MS19-036_T1(Baseline)_NR2	113	7.7	3	3	3	64	0	0	0	0	0	0	0	0	0	0	0	0	0	0	0	1	0	4	0	0	0	2	1	0	0	0	1	0	1	1	1	0	0	0	1	0	1	0
AL1A1_HUMAN	sp|P00352|AL1A1_HUMAN Retinal dehydrogenase 1 OS=Homo sapiens OX=9606 GN=ALDH1A1 PE=1 SV=2	6.29712	54827	F215947.dat	Q25572_MS19-036_T4_R10	111	8.2	3	3	3	3	0	0	0	0	0	0	0	0	0	0	0	0	0	0	0	0	0	0	0	0	0	0	0	0	0	0	0	0	0	0	0	0	0	0	0	0	0	0
ARGI1_HUMAN	sp|P05089|ARGI1_HUMAN Arginase-1 OS=Homo sapiens OX=9606 GN=ARG1 PE=1 SV=2	6.71914	34713	F215671.dat	Q25470_MS19-036_T1(Baseline)_NR17	103	9.3	3	3	3	13	2	0	0	0	0	3	0	0	0	0	0	0	1	0	0	1	0	1	0	0	0	0	0	0	0	0	0	0	0	0	0	0	0	0	0	0	0	0
FCN2_HUMAN	sp|Q15485|FCN2_HUMAN Ficolin-2 OS=Homo sapiens OX=9606 GN=FCN2 PE=1 SV=2	6.31353	33980	F215910.dat	Q25562_MS19-036_T4_R12	101	9.9	3	3	3	40	0	0	0	0	0	0	0	0	0	0	0	0	0	0	0	0	0	0	0	0	0	0	0	0	0	0	0	0	0	0	0	0	0	0	0	0	0	0
SPRL1_HUMAN	sp|Q14515|SPRL1_HUMAN SPARC-like protein 1 OS=Homo sapiens OX=9606 GN=SPARCL1 PE=1 SV=2	4.71469	75161	F215777.dat	Q25493_MS19-036_T1(Baseline)_NR11	79	6.5	3	3	3	78	0	0	0	0	0	0	0	0	2	0	0	0	0	0	0	0	1	0	0	1	2	2	0	0	2	2	2	3	0	3	1	1	2	0	2	0	2	0
HPHL1_HUMAN	sp|Q6MZM0|HPHL1_HUMAN Hephaestin-like protein 1 OS=Homo sapiens OX=9606 GN=HEPHL1 PE=2 SV=2	6.27197	131519	F215851.dat	Q25537_MS19-036_T3_R9	64	3.7	3	3	3	4	0	0	0	0	0	0	0	0	0	0	0	0	0	0	0	0	0	0	0	0	0	0	0	0	0	0	0	0	0	0	0	0	0	0	0	0	0	0
KRT81_HUMAN	sp|Q14533|KRT81_HUMAN Keratin, type II cuticular Hb1 OS=Homo sapiens OX=9606 GN=KRT81 PE=1 SV=3	5.40134	54893	F215921.dat	Q25564_MS19-036_T4_R6	3275	77	54	2	57	10	0	0	0	0	0	0	0	0	0	0	0	0	0	0	0	0	0	0	0	0	0	0	0	0	0	0	0	0	0	0	0	0	0	0	0	0	0	0
K2C1B_HUMAN	sp|Q7Z794|K2C1B_HUMAN Keratin, type II cytoskeletal 1b OS=Homo sapiens OX=9606 GN=KRT77 PE=2 SV=3	5.73268	61864	F215862.dat	Q25539_MS19-036_T1(Baseline)_R1	444	10.7	7	2	13	584	12	6	5	6	5	13	6	7	5	9	6	7	6	6	4	8	7	8	6	4	5	4	5	5	5	5	5	5	5	5	5	6	5	5	6	4	5	5
TENXA_HUMAN	sp|Q16473|TENXA_HUMAN Putative tenascin-XA OS=Homo sapiens OX=9606 GN=TNXA PE=5 SV=2	5.29476	33719	F215833.dat	Q25519_MS19-036_T2_R7	110	7.4	2	2	9	0	0	0	0	0	0	0	0	0	0	0	0	0	0	0	0	0	0	0	0	0	0	0	0	0	0	0	0	0	0	0	0	0	0	0	0	0	0	0
HBD_HUMAN	sp|P02042|HBD_HUMAN Hemoglobin subunit delta OS=Homo sapiens OX=9606 GN=HBD PE=1 SV=2	7.83977	16045	F215885.dat	Q25550_MS19-036_T3_NR4	534	55.1	8	2	8	6	0	0	0	0	0	0	0	0	0	0	0	0	0	0	0	0	0	0	0	0	0	0	0	0	0	0	0	0	0	0	0	0	0	0	0	0	0	0
FHR3_HUMAN	sp|Q02985|FHR3_HUMAN Complement factor H-related protein 3 OS=Homo sapiens OX=9606 GN=CFHR3 PE=1 SV=2	7.72272	37299	F215825.dat	Q25511_MS19-036_T1(Baseline)_NR6	346	13.6	6	2	8	27	0	0	0	0	0	0	0	0	0	0	1	0	0	0	1	2	0	0	0	1	0	0	1	0	0	1	0	0	2	0	0	0	0	0	0	0	0	0
IGL1_HUMAN	sp|P0DOX8|IGL1_HUMAN Immunoglobulin lambda-1 light chain OS=Homo sapiens OX=9606 PE=1 SV=1	6.34379	22816	F215906.dat	Q25561_MS19-036_T4_NR2	338	38	6	2	7	31	0	0	0	0	0	0	0	0	0	0	0	0	3	0	0	0	0	0	0	0	0	0	0	0	0	0	0	0	0	0	0	0	0	0	0	0	0	0
K1C27_HUMAN	sp|Q7Z3Y8|K1C27_HUMAN Keratin, type I cytoskeletal 27 OS=Homo sapiens OX=9606 GN=KRT27 PE=1 SV=2	4.98075	49792	F215674.dat	Q25473_MS19-036_T1(Baseline)_NR1	224	10.2	4	2	7	3	0	0	0	0	0	0	0	0	2	0	0	0	0	0	0	0	0	0	0	0	0	0	0	0	0	0	0	0	0	0	0	0	0	0	0	0	0	0
TITIN_HUMAN	sp|Q8WZ42|TITIN_HUMAN Titin OS=Homo sapiens OX=9606 GN=TTN PE=1 SV=4	6.01781	3813651	F215808.dat	Q25497_MS19-036_T4_NR15	56	0	2	2	7	78	0	0	0	0	0	1	0	0	2	1	1	1	1	0	1	1	0	0	1	0	1	2	0	0	1	0	2	1	2	1	1	2	0	3	1	1	1	1
IGLC2_HUMAN	sp|P0DOY2|IGLC2_HUMAN Immunoglobulin lambda constant 2 OS=Homo sapiens OX=9606 GN=IGLC2 PE=1 SV=1	6.90919	11287	F215906.dat	Q25561_MS19-036_T4_NR2	415	79.2	6	2	6	271	0	1	2	0	1	0	1	1	1	0	1	0	5	1	1	1	0	2	0	0	0	2	2	2	2	1	2	0	1	1	1	4	3	1	2	1	0	0
SAA2_HUMAN	sp|P0DJI9|SAA2_HUMAN Serum amyloid A-2 protein OS=Homo sapiens OX=9606 GN=SAA2 PE=1 SV=1	9.20225	13519	F215980.dat	Q25581_MS19-036_T4_NR5	398	49.2	5	2	6	22	0	0	0	0	0	0	0	0	0	0	0	0	0	0	0	1	0	0	0	0	0	0	0	0	0	0	0	0	0	0	0	2	0	0	0	0	0	0
IBP2_HUMAN	sp|P18065|IBP2_HUMAN Insulin-like growth factor-binding protein 2 OS=Homo sapiens OX=9606 GN=IGFBP2 PE=1 SV=2	7.47955	34791	F215761.dat	Q25491_MS19-036_T2_R3	123	6.5	2	2	5	15	0	0	0	0	1	0	0	0	0	0	0	0	0	0	0	2	0	0	0	0	0	0	0	0	0	2	0	1	0	1	0	0	0	0	0	0	0	0
ENPL_HUMAN	sp|P14625|ENPL_HUMAN Endoplasmin OS=Homo sapiens OX=9606 GN=HSP90B1 PE=1 SV=1	4.75916	92411	F215985.dat	Q25585_MS19-036_T3_NR9	116	3.1	2	2	5	68	0	0	0	0	0	0	2	0	0	0	0	0	1	0	1	1	1	0	0	0	0	1	0	0	1	1	1	1	0	1	1	1	0	1	0	0	0	1
LTBP1_HUMAN	sp|Q14766|LTBP1_HUMAN Latent-transforming growth factor beta-binding protein 1 OS=Homo sapiens OX=9606 GN=LTBP1 PE=1 SV=4	5.62713	186673	F215836.dat	Q25522_MS19-036_T2_R5	71	1.5	2	2	5	21	0	0	0	0	1	0	0	0	0	0	0	0	1	0	0	0	0	0	0	0	0	0	0	0	0	0	0	1	0	1	0	0	0	2	0	0	0	0
NID1_HUMAN	sp|P14543|NID1_HUMAN Nidogen-1 OS=Homo sapiens OX=9606 GN=NID1 PE=1 SV=3	5.11606	136291	F215876.dat	Q25546_MS19-036_T3_R13	70	2	2	2	5	27	0	0	0	0	0	0	0	0	0	0	0	0	0	0	0	2	0	0	0	1	0	0	0	0	0	0	0	0	0	0	0	1	0	1	0	0	0	0
DCD_HUMAN	sp|P81605|DCD_HUMAN Dermcidin OS=Homo sapiens OX=9606 GN=DCD PE=1 SV=2	6.08611	11277	F215849.dat	Q25535_MS19-036_T2_R10	135	24.5	2	2	4	52	0	2	3	0	1	2	2	1	0	0	2	2	3	2	0	0	1	2	1	0	0	0	2	0	1	0	0	0	0	0	0	0	0	0	1	0	0	0
1433E_HUMAN	sp|P62258|1433E_HUMAN 14-3-3 protein epsilon OS=Homo sapiens OX=9606 GN=YWHAE PE=1 SV=1	4.63254	29155	F215666.dat	Q25465_MS19-036_T2_NR17	121	8.6	2	2	4	3	1	0	0	0	0	0	0	0	0	0	0	0	0	0	0	0	0	0	0	0	0	0	0	0	0	0	0	0	0	0	0	0	0	0	0	0	0	0
C4BPB_HUMAN	sp|P20851|C4BPB_HUMAN C4b-binding protein beta chain OS=Homo sapiens OX=9606 GN=C4BPB PE=1 SV=1	5.05032	28338	F216014.dat	Q25574_MS19-036_T3_NR6	114	8.7	2	2	4	44	0	0	0	0	0	0	0	0	0	0	0	0	0	0	0	0	0	0	0	0	0	0	1	0	0	0	0	0	1	0	0	0	0	0	1	0	0	0
CD44_HUMAN	sp|P16070|CD44_HUMAN CD44 antigen OS=Homo sapiens OX=9606 GN=CD44 PE=1 SV=3	5.12925	81487	F215777.dat	Q25493_MS19-036_T1(Baseline)_NR11	89	2.7	2	2	4	95	0	0	0	0	1	0	0	1	0	0	0	0	0	0	1	0	1	1	0	0	2	1	1	1	0	0	1	2	1	1	2	1	1	1	1	1	1	1
MMP2_HUMAN	sp|P08253|MMP2_HUMAN 72 kDa type IV collagenase OS=Homo sapiens OX=9606 GN=MMP2 PE=1 SV=2	5.25776	73835	F215840.dat	Q25526_MS19-036_T1(Baseline)_NR15	87	3.9	2	2	4	56	0	0	0	0	0	0	0	0	0	0	0	1	0	0	0	0	0	0	0	0	0	0	1	0	0	1	0	2	0	0	1	1	0	0	0	0	0	1
G6PE_HUMAN	sp|O95479|G6PE_HUMAN GDH/6PGL endoplasmic bifunctional protein OS=Homo sapiens OX=9606 GN=H6PD PE=1 SV=2	6.83758	88836	F215975.dat	Q25578_MS19-036_T3_NR14	83	2.4	2	2	4	63	0	0	0	0	1	0	0	0	0	0	0	0	0	0	0	1	0	0	0	0	0	1	0	1	0	1	2	0	1	0	2	1	1	2	0	1	1	0
TARSH_HUMAN	sp|Q7Z7G0|TARSH_HUMAN Target of Nesh-SH3 OS=Homo sapiens OX=9606 GN=ABI3BP PE=1 SV=1	9.4817	118569	F215978.dat	Q25580_MS19-036_T4_R16	81	2.5	2	2	4	52	0	0	0	0	0	0	0	1	0	0	0	0	1	0	0	0	0	0	0	0	0	1	1	0	0	1	1	2	0	1	1	0	1	0	1	0	0	0
TLN1_HUMAN	sp|Q9Y490|TLN1_HUMAN Talin-1 OS=Homo sapiens OX=9606 GN=TLN1 PE=1 SV=3	5.7748	269599	F215819.dat	Q25505_MS19-036_T2_R6	71	0.8	2	2	4	6	0	0	0	0	0	0	0	0	0	0	0	0	0	0	0	0	0	0	0	0	0	0	0	0	0	0	0	0	0	0	0	0	0	0	0	0	0	0
1433Z_HUMAN	sp|P63104|1433Z_HUMAN 14-3-3 protein zeta/delta OS=Homo sapiens OX=9606 GN=YWHAZ PE=1 SV=1	4.72619	27728	F215686.dat	Q25478_MS19-036_T3_NR2	66	9	2	2	4	3	0	0	0	0	0	0	0	0	0	0	1	0	1	1	0	0	0	0	0	0	0	0	0	0	0	0	0	0	0	0	0	0	0	0	0	0	0	0
NRP1_HUMAN	sp|O14786|NRP1_HUMAN Neuropilin-1 OS=Homo sapiens OX=9606 GN=NRP1 PE=1 SV=3	5.5826	103069	F215923.dat	Q25566_MS19-036_T2_NR16	61	2.5	2	2	4	15	0	0	0	0	0	0	0	0	0	0	0	0	1	0	0	0	0	0	0	0	0	0	0	0	0	0	0	1	1	0	0	0	0	0	0	0	0	0
EF1A1_HUMAN	sp|P68104|EF1A1_HUMAN Elongation factor 1-alpha 1 OS=Homo sapiens OX=9606 GN=EEF1A1 PE=1 SV=1	9.10318	50109	F215975.dat	Q25578_MS19-036_T3_NR14	53	4.3	2	2	4	6	2	1	0	0	0	0	0	0	0	0	0	0	0	0	0	0	0	0	0	0	0	1	0	0	0	0	0	0	0	0	0	0	0	0	0	0	0	0
PCLO_HUMAN	sp|Q9Y6V0|PCLO_HUMAN Protein piccolo OS=Homo sapiens OX=9606 GN=PCLO PE=1 SV=5	6.07353	560355	F215972.dat	Q25576_MS19-036_T4_R13	47	0.3	2	2	4	47	0	0	0	0	0	0	0	0	0	0	0	0	0	0	0	0	0	1	0	0	0	1	0	2	0	1	0	0	0	0	0	0	0	1	1	1	0	0
VIME_HUMAN	sp|P08670|VIME_HUMAN Vimentin OS=Homo sapiens OX=9606 GN=VIM PE=1 SV=4	5.06346	53619	F215666.dat	Q25465_MS19-036_T2_NR17	196	7.7	3	2	3	4	3	1	0	0	0	0	0	0	0	0	0	0	0	0	0	0	0	0	0	0	0	0	0	0	0	0	0	0	0	0	0	0	0	0	0	0	0	0
HBG1_HUMAN	sp|P69891|HBG1_HUMAN Hemoglobin subunit gamma-1 OS=Homo sapiens OX=9606 GN=HBG1 PE=1 SV=2	6.64487	16130	F215843.dat	Q25529_MS19-036_T1(Baseline)_NR4	161	28.6	3	2	3	0	0	0	0	0	0	0	0	0	0	0	0	0	0	0	0	0	0	0	0	0	0	0	0	0	0	0	0	0	0	0	0	0	0	0	0	0	0	0
FA7_HUMAN	sp|P08709|FA7_HUMAN Coagulation factor VII OS=Homo sapiens OX=9606 GN=F7 PE=1 SV=1	6.91573	51560	F215812.dat	Q25500_MS19-036_T1(Baseline)_R2	145	7.1	2	2	3	46	0	0	0	0	0	0	0	0	0	0	0	0	0	0	0	0	0	0	0	0	0	1	0	1	0	1	0	0	0	0	0	1	0	0	2	0	0	0
COL11_HUMAN	sp|Q9BWP8|COL11_HUMAN Collectin-11 OS=Homo sapiens OX=9606 GN=COLEC11 PE=1 SV=1	5.26328	28647	F215906.dat	Q25561_MS19-036_T4_NR2	129	10.3	2	2	3	45	0	0	0	0	0	0	0	0	1	0	0	0	0	0	1	0	0	1	0	0	0	0	0	0	0	1	1	1	1	0	0	0	1	0	0	0	0	1
INHBC_HUMAN	sp|P55103|INHBC_HUMAN Inhibin beta C chain OS=Homo sapiens OX=9606 GN=INHBC PE=2 SV=1	6.66158	38213	F215926.dat	Q25569_MS19-036_T4_NR10	112	8	2	2	3	12	0	0	0	0	0	0	0	0	0	0	0	0	0	0	0	0	0	0	0	0	0	0	0	0	0	0	1	0	0	0	0	0	0	0	0	0	0	0
PRDX2_HUMAN	sp|P32119|PRDX2_HUMAN Peroxiredoxin-2 OS=Homo sapiens OX=9606 GN=PRDX2 PE=1 SV=5	5.66332	21878	F215926.dat	Q25569_MS19-036_T4_NR10	112	12.6	2	2	3	76	1	1	0	0	0	0	2	0	0	0	0	0	0	0	0	0	0	0	0	0	0	0	1	0	0	0	0	2	0	1	0	0	1	0	1	1	0	2
H2A1B_HUMAN	sp|P04908|H2A1B_HUMAN Histone H2A type 1-B/E OS=Homo sapiens OX=9606 GN=HIST1H2AB PE=1 SV=2	11.0496	14127	F215666.dat	Q25465_MS19-036_T2_NR17	111	20	2	2	3	65	3	3	0	2	1	0	0	0	0	2	3	0	2	2	0	0	2	1	2	2	2	1	2	1	2	1	1	1	1	1	0	1	1	1	0	1	2	2
1A02_HUMAN	sp|P01892|1A02_HUMAN HLA class I histocompatibility antigen, A-2 alpha chain OS=Homo sapiens OX=9606 GN=HLA-A PE=1 SV=1	6.50312	40896	F215972.dat	Q25576_MS19-036_T4_R13	110	9	2	2	3	0	0	0	0	0	0	0	0	0	0	0	0	0	0	0	0	0	0	0	0	0	0	0	0	0	0	0	0	0	0	0	0	0	0	0	0	0	0	0
KRA32_HUMAN	sp|Q9BYR7|KRA32_HUMAN Keratin-associated protein 3-2 OS=Homo sapiens OX=9606 GN=KRTAP3-2 PE=1 SV=1	5.39945	10400	F215921.dat	Q25564_MS19-036_T4_R6	110	20.4	2	2	3	12	0	0	0	0	0	0	0	0	0	0	0	0	0	0	0	0	0	0	0	0	0	0	0	0	0	0	0	0	0	0	0	0	0	0	0	0	0	0
DIAC_HUMAN	sp|Q01459|DIAC_HUMAN Di-N-acetylchitobiase OS=Homo sapiens OX=9606 GN=CTBS PE=1 SV=1	6.18865	43732	F215906.dat	Q25561_MS19-036_T4_NR2	107	5.5	2	2	3	54	0	0	0	0	0	0	0	0	1	0	0	0	0	0	0	0	0	0	0	0	0	0	0	0	0	1	0	0	1	0	0	0	0	0	0	0	0	0
RARR2_HUMAN	sp|Q99969|RARR2_HUMAN Retinoic acid receptor responder protein 2 OS=Homo sapiens OX=9606 GN=RARRES2 PE=1 SV=1	9.29783	18606	F215899.dat	Q25557_MS19-036_T3_NR15	104	14.7	2	2	3	127	0	0	0	0	1	0	0	1	1	0	0	0	1	0	0	3	0	0	0	0	1	0	0	3	0	1	2	1	2	1	0	0	1	2	0	1	2	0
HV374_HUMAN	sp|A0A0B4J1X5|HV374_HUMAN Immunoglobulin heavy variable 3-74 OS=Homo sapiens OX=9606 GN=IGHV3-74 PE=3 SV=1	8.90567	12831	F215685.dat	Q25477_MS19-036_T4_NR18	91	15.4	2	2	3	7	0	0	0	0	0	0	0	0	0	0	0	0	2	0	0	0	0	0	0	0	0	0	0	0	0	0	0	0	0	0	0	0	0	0	0	0	0	0
S10A8_HUMAN	sp|P05109|S10A8_HUMAN Protein S100-A8 OS=Homo sapiens OX=9606 GN=S100A8 PE=1 SV=1	6.51073	10828	F215819.dat	Q25505_MS19-036_T2_R6	91	23.7	2	2	3	76	0	0	1	0	0	0	0	0	0	0	0	0	0	0	0	1	0	3	0	1	0	0	0	2	0	0	1	0	1	1	0	2	0	0	0	0	0	1
MUC18_HUMAN	sp|P43121|MUC18_HUMAN Cell surface glycoprotein MUC18 OS=Homo sapiens OX=9606 GN=MCAM PE=1 SV=2	5.58434	71563	F215983.dat	Q25583_MS19-036_T4_NR3	81	4.3	2	2	3	12	0	0	0	0	0	0	0	0	0	0	0	0	0	0	0	0	0	0	0	0	0	0	0	0	0	0	0	0	0	0	0	0	0	0	1	0	0	0
H33_HUMAN	sp|P84243|H33_HUMAN Histone H3.3 OS=Homo sapiens OX=9606 GN=H3F3A PE=1 SV=2	11.2694	15319	F215851.dat	Q25537_MS19-036_T3_R9	76	28.7	2	2	3	1	0	0	0	0	0	0	0	0	0	0	0	0	0	0	0	0	0	0	0	0	0	0	0	0	0	0	0	0	0	0	0	0	0	0	0	0	0	0
FCG3A_HUMAN	sp|P08637|FCG3A_HUMAN Low affinity immunoglobulin gamma Fc region receptor III-A OS=Homo sapiens OX=9606 GN=FCGR3A PE=1 SV=2	8.20127	29071	F215825.dat	Q25511_MS19-036_T1(Baseline)_NR6	73	7.1	2	2	3	53	0	0	0	0	0	0	0	0	0	0	0	0	0	0	0	0	0	0	0	0	0	0	0	0	0	0	2	0	0	0	0	0	0	0	0	1	0	0
LEG3_HUMAN	sp|P17931|LEG3_HUMAN Galectin-3 OS=Homo sapiens OX=9606 GN=LGALS3 PE=1 SV=5	8.57591	26136	F215921.dat	Q25564_MS19-036_T4_R6	62	8.8	2	2	3	3	0	0	0	0	0	0	0	0	0	0	0	0	0	0	0	0	0	0	0	0	0	0	0	0	0	0	0	0	0	0	0	0	0	0	0	0	0	0
CAMP_HUMAN	sp|P49913|CAMP_HUMAN Cathelicidin antimicrobial peptide OS=Homo sapiens OX=9606 GN=CAMP PE=1 SV=1	9.48119	19289	F215983.dat	Q25583_MS19-036_T4_NR3	57	13.5	2	2	3	7	0	0	0	0	0	0	0	0	0	0	0	0	0	0	0	0	0	0	0	0	0	0	0	0	0	0	0	0	0	0	0	0	0	0	0	0	0	0
LRP1_HUMAN	sp|Q07954|LRP1_HUMAN Prolow-density lipoprotein receptor-related protein 1 OS=Homo sapiens OX=9606 GN=LRP1 PE=1 SV=2	5.1639	504276	F215926.dat	Q25569_MS19-036_T4_NR10	51	0.5	2	2	3	14	0	0	0	0	0	0	0	0	0	0	0	0	0	0	0	0	0	0	0	0	0	0	0	0	0	0	0	0	0	0	0	0	0	0	0	0	0	0
KR195_HUMAN	sp|Q3LI72|KR195_HUMAN Keratin-associated protein 19-5 OS=Homo sapiens OX=9606 GN=KRTAP19-5 PE=1 SV=1	8.32263	7619	F215896.dat	Q25554_MS19-036_T3_NR8	135	52.8	2	2	2	3	0	0	0	0	0	0	0	0	0	0	0	0	0	0	0	0	0	0	0	0	0	0	0	0	0	0	0	0	0	0	0	0	0	0	0	0	0	0
KRA43_HUMAN	sp|Q9BYR4|KRA43_HUMAN Keratin-associated protein 4-3 OS=Homo sapiens OX=9606 GN=KRTAP4-3 PE=2 SV=2	8.42552	20487	F215851.dat	Q25537_MS19-036_T3_R9	131	12.8	2	2	2	15	0	0	0	0	0	0	0	0	0	0	0	0	0	0	0	0	0	0	0	0	0	0	0	0	0	0	0	0	0	0	0	0	0	0	0	0	0	0
IGJ_HUMAN	sp|P01591|IGJ_HUMAN Immunoglobulin J chain OS=Homo sapiens OX=9606 GN=JCHAIN PE=1 SV=4	5.11555	18087	F215906.dat	Q25561_MS19-036_T4_NR2	121	13.8	2	2	2	66	0	0	1	0	1	0	0	0	0	0	0	0	1	0	0	0	0	1	0	0	0	0	0	0	0	0	0	0	0	0	0	0	0	0	0	0	0	0
KRA33_HUMAN	sp|Q9BYR6|KRA33_HUMAN Keratin-associated protein 3-3 OS=Homo sapiens OX=9606 GN=KRTAP3-3 PE=1 SV=1	5.39945	10357	F215921.dat	Q25564_MS19-036_T4_R6	119	20.4	2	2	2	9	0	0	0	0	0	0	0	0	0	0	0	0	0	0	0	0	0	0	0	0	0	0	0	0	0	0	0	0	0	0	0	0	0	0	0	0	0	0
HNRPK_HUMAN	sp|P61978|HNRPK_HUMAN Heterogeneous nuclear ribonucleoprotein K OS=Homo sapiens OX=9606 GN=HNRNPK PE=1 SV=1	5.39097	50944	F215666.dat	Q25465_MS19-036_T2_NR17	114	7.6	2	2	2	5	3	1	0	0	0	0	0	0	0	1	0	0	0	0	0	0	0	0	0	0	0	0	0	0	0	0	0	0	0	0	0	0	0	0	0	0	0	0
PTGDS_HUMAN	sp|P41222|PTGDS_HUMAN Prostaglandin-H2 D-isomerase OS=Homo sapiens OX=9606 GN=PTGDS PE=1 SV=1	7.65616	21015	F215926.dat	Q25569_MS19-036_T4_NR10	114	12.1	2	2	2	16	0	0	1	0	0	0	0	0	0	0	0	0	1	0	0	0	0	0	0	0	0	0	0	0	0	0	0	0	0	0	0	0	0	0	0	0	0	0
EPCR_HUMAN	sp|Q9UNN8|EPCR_HUMAN Endothelial protein C receptor OS=Homo sapiens OX=9606 GN=PROCR PE=1 SV=1	6.69777	26655	F215985.dat	Q25585_MS19-036_T3_NR9	114	12.6	2	2	2	28	0	0	1	0	0	0	0	0	0	0	0	0	0	0	1	0	0	0	1	0	0	0	1	0	0	0	0	0	0	0	0	0	0	0	0	0	0	1
CH3L1_HUMAN	sp|P36222|CH3L1_HUMAN Chitinase-3-like protein 1 OS=Homo sapiens OX=9606 GN=CHI3L1 PE=1 SV=2	8.69005	42598	F215868.dat	Q25541_MS19-036_T1(Baseline)_NR3	113	8.9	2	2	2	2	0	0	0	0	0	0	0	0	0	0	0	0	0	0	0	0	0	0	0	0	0	0	0	0	0	0	0	0	0	0	0	0	0	0	0	0	0	0
KRA21_HUMAN	sp|Q9BYU5|KRA21_HUMAN Keratin-associated protein 2-1 OS=Homo sapiens OX=9606 GN=KRTAP2-1 PE=2 SV=2	8.31782	13503	F215921.dat	Q25564_MS19-036_T4_R6	109	27.3	2	2	2	13	0	0	0	0	0	0	0	0	0	0	0	0	0	0	0	0	0	0	0	0	0	0	0	0	0	0	0	0	0	0	0	0	0	0	0	0	0	0
PTPRG_HUMAN	sp|P23470|PTPRG_HUMAN Receptor-type tyrosine-protein phosphatase gamma OS=Homo sapiens OX=9606 GN=PTPRG PE=1 SV=4	5.98673	161901	F215895.dat	Q25553_MS19-036_T3_NR16	109	1.9	2	2	2	88	1	1	1	0	1	0	1	0	0	0	0	0	2	1	0	0	1	0	0	1	1	1	0	1	2	0	1	1	1	2	1	1	0	1	2	0	1	1
KR132_HUMAN	sp|Q52LG2|KR132_HUMAN Keratin-associated protein 13-2 OS=Homo sapiens OX=9606 GN=KRTAP13-2 PE=1 SV=1	8.71505	18714	F215921.dat	Q25564_MS19-036_T4_R6	106	11.4	2	2	2	6	0	0	0	0	0	0	0	0	0	0	0	0	0	0	0	0	0	0	0	0	0	0	0	0	0	0	0	0	0	0	0	0	0	0	0	0	0	0
CSF1R_HUMAN	sp|P07333|CSF1R_HUMAN Macrophage colony-stimulating factor 1 receptor OS=Homo sapiens OX=9606 GN=CSF1R PE=1 SV=2	5.93132	107915	F215926.dat	Q25569_MS19-036_T4_NR10	105	2.7	2	2	2	15	0	0	0	0	0	0	0	0	0	0	0	0	0	0	0	0	0	0	0	0	0	0	0	0	0	0	0	0	0	0	0	0	0	0	0	0	0	0
ADA2_HUMAN	sp|Q9NZK5|ADA2_HUMAN Adenosine deaminase 2 OS=Homo sapiens OX=9606 GN=ADA2 PE=1 SV=2	7.7517	58895	F215877.dat	Q25547_MS19-036_T3_NR12	102	4.1	2	2	2	8	0	0	0	0	1	0	0	0	0	0	0	0	0	0	0	0	0	0	0	0	0	1	0	0	0	0	0	0	0	0	0	0	0	0	0	0	0	0
HV404_HUMAN	sp|A0A075B6R2|HV404_HUMAN Immunoglobulin heavy variable 4-4 OS=Homo sapiens OX=9606 GN=IGHV4-4 PE=3 SV=2	9.64257	12840	F215685.dat	Q25477_MS19-036_T4_NR18	97	19.7	2	2	2	2	0	0	0	0	0	0	0	0	0	0	0	0	2	0	0	0	0	0	0	0	0	0	0	0	0	0	0	0	0	0	0	0	0	0	0	0	0	0
MEGF8_HUMAN	sp|Q7Z7M0|MEGF8_HUMAN Multiple epidermal growth factor-like domains protein 8 OS=Homo sapiens OX=9606 GN=MEGF8 PE=1 SV=2	6.45031	302901	F215922.dat	Q25565_MS19-036_T3_NR10	96	0.8	2	2	2	20	0	0	0	0	0	0	0	0	0	0	0	0	0	0	0	0	0	0	0	0	0	0	0	0	0	0	0	0	0	0	0	0	0	0	2	1	0	0
TAGL2_HUMAN	sp|P37802|TAGL2_HUMAN Transgelin-2 OS=Homo sapiens OX=9606 GN=TAGLN2 PE=1 SV=3	8.40855	22377	F215878.dat	Q25548_MS19-036_T4_NR9	96	13.1	2	2	2	6	0	0	0	0	0	0	0	0	0	0	0	0	0	0	0	0	0	0	0	0	0	0	0	0	0	0	0	0	0	0	0	0	0	0	0	0	0	0
FAAA_HUMAN	sp|P16930|FAAA_HUMAN Fumarylacetoacetase OS=Homo sapiens OX=9606 GN=FAH PE=1 SV=2	6.45604	46344	F215947.dat	Q25572_MS19-036_T4_R10	93	5.3	2	2	2	5	0	0	0	0	0	0	0	0	0	0	0	0	0	0	0	0	0	0	0	0	0	0	0	0	0	0	1	0	0	0	0	0	0	0	0	0	0	0
KR161_HUMAN	sp|A8MUX0|KR161_HUMAN Keratin-associated protein 16-1 OS=Homo sapiens OX=9606 GN=KRTAP16-1 PE=3 SV=1	5.37277	53873	F215921.dat	Q25564_MS19-036_T4_R6	92	4.6	2	2	2	4	0	0	0	0	0	0	0	0	0	0	0	0	0	0	0	0	0	0	0	0	0	0	0	0	0	0	0	0	0	0	0	0	0	0	0	0	0	0
AOC3_HUMAN	sp|Q16853|AOC3_HUMAN Membrane primary amine oxidase OS=Homo sapiens OX=9606 GN=AOC3 PE=1 SV=3	6.04761	84568	F215922.dat	Q25565_MS19-036_T3_NR10	90	3.4	2	2	2	10	0	0	0	0	0	0	0	0	0	0	0	0	0	0	0	0	1	0	0	0	0	0	0	0	0	0	0	0	0	0	0	0	0	0	1	0	0	0
EF2_HUMAN	sp|P13639|EF2_HUMAN Elongation factor 2 OS=Homo sapiens OX=9606 GN=EEF2 PE=1 SV=4	6.40635	95277	F215667.dat	Q25466_MS19-036_T3_R11	82	4.7	2	2	2	3	1	2	0	0	0	0	0	0	0	0	0	0	0	0	0	0	0	0	0	0	0	0	0	0	0	0	0	0	0	0	0	0	0	0	0	0	0	0
LAMP2_HUMAN	sp|P13473|LAMP2_HUMAN Lysosome-associated membrane glycoprotein 2 OS=Homo sapiens OX=9606 GN=LAMP2 PE=1 SV=2	5.35273	44932	F215924.dat	Q25567_MS19-036_T4_R14	81	3.7	2	2	2	91	0	0	0	0	0	0	0	0	0	0	0	0	0	0	0	0	0	0	0	0	0	1	1	0	0	0	1	0	0	0	1	0	1	1	0	0	0	0
RS27A_HUMAN	sp|P62979|RS27A_HUMAN Ubiquitin-40S ribosomal protein S27a OS=Homo sapiens OX=9606 GN=RPS27A PE=1 SV=2	9.67758	17953	F215851.dat	Q25537_MS19-036_T3_R9	80	16	2	2	2	17	1	0	1	0	0	1	0	0	0	1	0	1	0	0	0	0	1	1	0	0	0	0	0	0	0	0	0	0	0	0	0	0	0	0	0	0	0	0
PVR_HUMAN	sp|P15151|PVR_HUMAN Poliovirus receptor OS=Homo sapiens OX=9606 GN=PVR PE=1 SV=2	6.06709	45274	F215983.dat	Q25583_MS19-036_T4_NR3	78	5.3	2	2	2	24	0	0	0	0	0	0	0	0	0	0	0	0	0	0	0	0	0	0	0	0	0	0	0	0	0	0	0	0	0	0	0	0	0	0	1	0	0	0
CH60_HUMAN	sp|P10809|CH60_HUMAN 60 kDa heat shock protein, mitochondrial OS=Homo sapiens OX=9606 GN=HSPD1 PE=1 SV=2	5.70258	61016	F215666.dat	Q25465_MS19-036_T2_NR17	76	6.8	2	2	2	2	2	0	0	0	0	0	0	0	0	0	0	0	0	0	0	0	0	0	0	0	0	0	0	0	0	0	0	0	0	0	0	0	0	0	0	0	0	0
TBA1A_HUMAN	sp|Q71U36|TBA1A_HUMAN Tubulin alpha-1A chain OS=Homo sapiens OX=9606 GN=TUBA1A PE=1 SV=1	4.94288	50104	F215851.dat	Q25537_MS19-036_T3_R9	75	5.8	2	2	2	0	0	0	0	0	0	0	0	0	0	0	0	0	0	0	0	0	0	0	0	0	0	0	0	0	0	0	0	0	0	0	0	0	0	0	0	0	0	0
KR10C_HUMAN	sp|P60413|KR10C_HUMAN Keratin-associated protein 10-12 OS=Homo sapiens OX=9606 GN=KRTAP10-12 PE=2 SV=1	7.94196	25088	F215851.dat	Q25537_MS19-036_T3_R9	75	8.2	2	2	2	3	0	0	0	0	0	0	0	0	0	0	0	0	0	0	0	0	0	0	0	0	0	0	0	0	0	0	0	0	0	0	0	0	0	0	0	0	0	0
OIT3_HUMAN	sp|Q8WWZ8|OIT3_HUMAN Oncoprotein-induced transcript 3 protein OS=Homo sapiens OX=9606 GN=OIT3 PE=1 SV=2	5.34353	59983	F215926.dat	Q25569_MS19-036_T4_NR10	74	4.4	2	2	2	6	0	0	0	0	0	0	0	0	0	0	0	0	0	0	0	0	0	0	0	0	0	0	0	0	0	0	0	0	0	0	0	0	0	0	0	0	0	0
KIT_HUMAN	sp|P10721|KIT_HUMAN Mast/stem cell growth factor receptor Kit OS=Homo sapiens OX=9606 GN=KIT PE=1 SV=1	6.54115	109794	F215873.dat	Q25543_MS19-036_T3_NR11	69	2.6	2	2	2	15	0	0	0	0	0	0	0	0	0	0	0	0	0	0	0	0	0	0	0	0	0	0	0	0	0	0	0	0	0	0	0	0	0	0	0	0	0	0
C1QR1_HUMAN	sp|Q9NPY3|C1QR1_HUMAN Complement component C1q receptor OS=Homo sapiens OX=9606 GN=CD93 PE=1 SV=3	5.27064	68515	F216014.dat	Q25574_MS19-036_T3_NR6	69	2.8	2	2	2	10	0	0	0	0	0	0	0	0	0	0	0	0	0	0	1	0	0	0	0	0	0	0	0	0	0	0	0	1	0	1	0	0	0	0	0	0	0	0
EZRI_HUMAN	sp|P15311|EZRI_HUMAN Ezrin OS=Homo sapiens OX=9606 GN=EZR PE=1 SV=4	5.94282	69370	F215818.dat	Q25504_MS19-036_T1(Baseline)_NR10	68	3.1	2	2	2	69	0	0	0	0	0	0	0	0	1	0	0	0	0	0	0	1	0	1	0	0	0	2	1	1	1	0	2	0	0	1	0	1	2	0	1	0	1	1
FBCD1_HUMAN	sp|Q8N539|FBCD1_HUMAN Fibrinogen C domain-containing protein 1 OS=Homo sapiens OX=9606 GN=FIBCD1 PE=1 SV=2	6.01654	50712	F215877.dat	Q25547_MS19-036_T3_NR12	66	2.2	2	2	2	15	0	0	0	0	0	0	0	0	0	0	0	0	0	0	0	0	0	0	0	0	0	0	0	0	0	0	0	0	1	0	0	0	0	0	0	0	0	0
H12_HUMAN	sp|P16403|H12_HUMAN Histone H1.2 OS=Homo sapiens OX=9606 GN=HIST1H1C PE=1 SV=2	10.9354	21352	F215921.dat	Q25564_MS19-036_T4_R6	66	11.3	2	2	2	2	0	0	0	0	0	0	0	0	0	0	0	0	0	0	0	0	0	0	0	0	0	0	0	0	0	0	0	0	0	0	0	0	0	0	0	0	0	0
H31T_HUMAN	sp|Q16695|H31T_HUMAN Histone H3.1t OS=Homo sapiens OX=9606 GN=HIST3H3 PE=1 SV=3	11.127	15499	F215921.dat	Q25564_MS19-036_T4_R6	65	13.2	2	2	2	0	0	0	0	0	0	0	0	0	0	0	0	0	0	0	0	0	0	0	0	0	0	0	0	0	0	0	0	0	0	0	0	0	0	0	0	0	0	0
DCXR_HUMAN	sp|Q7Z4W1|DCXR_HUMAN L-xylulose reductase OS=Homo sapiens OX=9606 GN=DCXR PE=1 SV=2	8.32855	25897	F215947.dat	Q25572_MS19-036_T4_R10	64	9.4	2	2	2	2	0	0	0	0	0	0	0	0	0	0	0	0	0	0	0	0	0	0	0	0	0	0	0	0	0	0	0	0	0	0	0	0	0	0	0	0	0	0
KRA46_HUMAN	sp|Q9BYQ5|KRA46_HUMAN Keratin-associated protein 4-6 OS=Homo sapiens OX=9606 GN=KRTAP4-6 PE=2 SV=4	8.42629	21807	F215851.dat	Q25537_MS19-036_T3_R9	63	28.8	2	2	2	2	0	0	0	0	0	0	0	0	0	0	0	0	0	0	0	0	0	0	0	0	0	0	0	0	0	0	0	0	0	0	0	0	0	0	0	0	0	0
ALAT1_HUMAN	sp|P24298|ALAT1_HUMAN Alanine aminotransferase 1 OS=Homo sapiens OX=9606 GN=GPT PE=1 SV=3	6.77245	54602	F215947.dat	Q25572_MS19-036_T4_R10	62	5.2	2	2	2	2	0	0	0	0	0	0	0	0	0	0	0	0	0	0	0	0	0	0	0	0	0	0	0	0	0	0	0	0	0	0	0	0	0	0	0	0	0	0
URP2_HUMAN	sp|Q86UX7|URP2_HUMAN Fermitin family homolog 3 OS=Homo sapiens OX=9606 GN=FERMT3 PE=1 SV=1	6.52515	75905	F215829.dat	Q25515_MS19-036_T2_R16	59	3	2	2	2	5	0	1	0	0	0	0	0	0	0	0	0	0	0	0	0	0	0	0	0	0	0	0	0	0	0	0	0	0	0	0	0	0	0	0	0	0	0	0
KRA44_HUMAN	sp|Q9BYR3|KRA44_HUMAN Keratin-associated protein 4-4 OS=Homo sapiens OX=9606 GN=KRTAP4-4 PE=1 SV=1	8.38775	18008	F215851.dat	Q25537_MS19-036_T3_R9	58	14.5	2	2	2	12	0	0	0	0	0	0	0	0	0	0	0	0	0	0	0	0	0	0	0	0	0	0	0	0	0	0	0	0	0	0	0	0	0	0	0	0	0	0
ILEU_HUMAN	sp|P30740|ILEU_HUMAN Leukocyte elastase inhibitor OS=Homo sapiens OX=9606 GN=SERPINB1 PE=1 SV=1	5.90377	42715	F215924.dat	Q25567_MS19-036_T4_R14	58	5	2	2	2	3	0	0	0	0	0	0	0	0	0	0	0	0	0	0	0	0	0	0	0	0	0	0	0	0	0	0	0	0	0	0	0	0	0	0	0	0	0	0
PDZD7_HUMAN	sp|Q9H5P4|PDZD7_HUMAN PDZ domain-containing protein 7 OS=Homo sapiens OX=9606 GN=PDZD7 PE=1 SV=2	9.73851	111683	F215828.dat	Q25514_MS19-036_T4_R9	57	1.4	2	2	2	90	0	0	0	0	0	0	1	0	0	0	1	1	1	0	0	1	1	0	1	0	0	1	1	1	0	0	0	0	1	1	1	1	1	1	3	1	0	0
SPR2E_HUMAN	sp|P22531|SPR2E_HUMAN Small proline-rich protein 2E OS=Homo sapiens OX=9606 GN=SPRR2E PE=2 SV=2	8.73223	7850	F215827.dat	Q25513_MS19-036_T2_R11	56	30.6	2	2	2	2	0	0	0	0	0	0	0	0	0	0	0	0	0	0	0	0	0	0	0	0	0	0	0	0	0	0	0	0	0	0	0	0	0	0	0	0	0	0
BST1_HUMAN	sp|Q10588|BST1_HUMAN ADP-ribosyl cyclase/cyclic ADP-ribose hydrolase 2 OS=Homo sapiens OX=9606 GN=BST1 PE=1 SV=2	7.96777	35701	F215926.dat	Q25569_MS19-036_T4_NR10	54	5.3	2	2	2	56	0	0	0	0	1	0	0	1	1	0	0	0	0	0	0	0	0	0	0	0	0	0	0	1	0	0	1	1	1	0	0	0	1	0	0	0	1	0
LYAM1_HUMAN	sp|P14151|LYAM1_HUMAN L-selectin OS=Homo sapiens OX=9606 GN=SELL PE=1 SV=2	6.19662	42159	F215972.dat	Q25576_MS19-036_T4_R13	54	7	2	2	2	48	0	0	0	0	0	0	0	0	0	0	0	0	0	0	0	0	0	0	0	0	0	0	1	0	0	0	1	0	0	0	0	0	0	0	0	0	0	0
ACY1_HUMAN	sp|Q03154|ACY1_HUMAN Aminoacylase-1 OS=Homo sapiens OX=9606 GN=ACY1 PE=1 SV=1	5.77123	45856	F215947.dat	Q25572_MS19-036_T4_R10	54	8.3	2	2	2	4	0	0	0	0	0	0	0	0	0	0	0	0	0	0	0	0	0	0	0	0	0	0	0	0	0	0	0	0	0	0	0	0	0	0	0	0	0	0
SPR1B_HUMAN	sp|P22528|SPR1B_HUMAN Cornifin-B OS=Homo sapiens OX=9606 GN=SPRR1B PE=1 SV=2	8.84586	9881	F215827.dat	Q25513_MS19-036_T2_R11	53	18	2	2	2	4	0	0	0	0	0	0	0	0	0	0	0	0	0	0	0	0	0	0	0	0	0	0	0	0	0	0	0	0	0	0	0	0	0	0	0	0	0	0
KR411_HUMAN	sp|Q9BYQ6|KR411_HUMAN Keratin-associated protein 4-11 OS=Homo sapiens OX=9606 GN=KRTAP4-11 PE=1 SV=2	8.40462	20910	F215921.dat	Q25564_MS19-036_T4_R6	52	24.1	2	2	2	0	0	0	0	0	0	0	0	0	0	0	0	0	0	0	0	0	0	0	0	0	0	0	0	0	0	0	0	0	0	0	0	0	0	0	0	0	0	0
CC187_HUMAN	sp|A0A096LP49|CC187_HUMAN Coiled-coil domain-containing protein 187 OS=Homo sapiens OX=9606 GN=CCDC187 PE=2 SV=1	9.75646	114785	F215852.dat	Q25538_MS19-036_T3_R12	51	1.6	2	2	2	123	2	0	1	1	1	1	1	1	1	0	1	2	2	2	1	1	1	1	0	0	1	1	1	1	1	1	0	2	1	1	1	2	1	1	1	1	1	1
ZG16B_HUMAN	sp|Q96DA0|ZG16B_HUMAN Zymogen granule protein 16 homolog B OS=Homo sapiens OX=9606 GN=ZG16B PE=1 SV=3	6.74265	22725	F215686.dat	Q25478_MS19-036_T3_NR2	51	12	2	2	2	2	0	0	0	0	0	0	0	0	0	0	0	0	0	2	0	0	0	0	0	0	0	0	0	0	0	0	0	0	0	0	0	0	0	0	0	0	0	0
SEM4D_HUMAN	sp|Q92854|SEM4D_HUMAN Semaphorin-4D OS=Homo sapiens OX=9606 GN=SEMA4D PE=1 SV=1	8.24861	96089	F215813.dat	Q25501_MS19-036_T2_NR6	50	0.9	2	2	2	71	1	0	1	1	2	0	0	1	1	0	1	0	1	0	0	1	0	1	1	1	0	0	0	0	0	0	0	1	1	0	0	0	0	0	0	2	0	0
SFR19_HUMAN	sp|Q9H7N4|SFR19_HUMAN Splicing factor, arginine/serine-rich 19 OS=Homo sapiens OX=9606 GN=SCAF1 PE=1 SV=3	9.3079	139186	F215817.dat	Q25503_MS19-036_T2_NR10	47	1.1	2	2	2	80	0	0	0	0	0	0	0	1	1	0	0	1	0	0	0	0	0	0	0	0	0	1	1	0	1	0	1	0	1	1	0	2	1	0	2	0	0	2
LMO7_HUMAN	sp|Q8WWI1|LMO7_HUMAN LIM domain only protein 7 OS=Homo sapiens OX=9606 GN=LMO7 PE=1 SV=3	8.34466	192576	F215820.dat	Q25506_MS19-036_T4_R4	39	0.8	2	2	2	7	0	0	0	0	0	0	0	0	0	0	0	0	0	0	0	0	0	0	0	0	0	0	0	0	0	0	0	0	0	0	0	0	0	0	0	0	0	0
AHNK_HUMAN	sp|Q09666|AHNK_HUMAN Neuroblast differentiation-associated protein AHNAK OS=Homo sapiens OX=9606 GN=AHNAK PE=1 SV=2	5.80072	628699	F215825.dat	Q25511_MS19-036_T1(Baseline)_NR6	31	0.2	2	2	2	7	0	0	0	0	0	0	0	0	0	0	0	0	0	0	0	0	0	0	0	0	0	0	0	0	0	0	0	0	0	0	0	0	0	0	0	0	0	0
K2C6A_HUMAN	sp|P02538|K2C6A_HUMAN Keratin, type II cytoskeletal 6A OS=Homo sapiens OX=9606 GN=KRT6A PE=1 SV=3	8.09061	60008	F215868.dat	Q25541_MS19-036_T1(Baseline)_NR3	2445	58.3	40	1	44	42	0	0	1	1	1	0	1	0	0	0	0	1	0	1	0	1	0	1	0	1	0	0	1	1	1	1	0	0	1	1	0	1	0	0	0	0	1	1
K2C6B_HUMAN	sp|P04259|K2C6B_HUMAN Keratin, type II cytoskeletal 6B OS=Homo sapiens OX=9606 GN=KRT6B PE=1 SV=5	8.09055	60030	F215868.dat	Q25541_MS19-036_T1(Baseline)_NR3	2302	55.3	39	1	42	6	0	0	0	0	0	0	0	0	0	0	0	0	0	0	0	0	0	0	0	0	0	0	0	1	0	0	0	0	0	0	0	0	0	0	0	0	0	0
IGM_HUMAN	sp|P0DOX6|IGM_HUMAN Immunoglobulin mu heavy chain OS=Homo sapiens OX=9606 PE=1 SV=2	8.12388	63446	F215980.dat	Q25581_MS19-036_T4_NR5	964	33.5	16	1	21	9	0	0	0	0	0	0	0	0	0	0	0	0	0	0	0	0	0	0	0	0	0	0	0	0	0	0	0	0	0	0	0	0	0	0	0	0	0	0
K2C79_HUMAN	sp|Q5XKE5|K2C79_HUMAN Keratin, type II cytoskeletal 79 OS=Homo sapiens OX=9606 GN=KRT79 PE=1 SV=2	6.7473	57800	F215868.dat	Q25541_MS19-036_T1(Baseline)_NR3	632	13.1	11	1	16	1	0	0	0	0	0	0	0	0	0	0	0	0	0	0	0	0	0	0	0	0	0	0	0	0	0	0	0	0	0	0	0	0	0	0	0	0	0	0
K2C8_HUMAN	sp|P05787|K2C8_HUMAN Keratin, type II cytoskeletal 8 OS=Homo sapiens OX=9606 GN=KRT8 PE=1 SV=7	5.51942	53671	F215671.dat	Q25470_MS19-036_T1(Baseline)_NR17	419	11.2	8	1	15	17	1	1	1	0	0	1	0	1	0	1	1	1	0	0	0	0	0	0	1	0	0	1	1	0	1	0	0	0	0	0	0	0	0	0	0	0	0	1
K2C73_HUMAN	sp|Q86Y46|K2C73_HUMAN Keratin, type II cytoskeletal 73 OS=Homo sapiens OX=9606 GN=KRT73 PE=1 SV=1	6.92969	58887	F215689.dat	Q25481_MS19-036_T2_NR13	348	7.8	6	1	9	0	0	0	0	0	0	0	0	0	0	0	0	0	0	0	0	0	0	0	0	0	0	0	0	0	0	0	0	0	0	0	0	0	0	0	0	0	0	0
K2C74_HUMAN	sp|Q7RTS7|K2C74_HUMAN Keratin, type II cytoskeletal 74 OS=Homo sapiens OX=9606 GN=KRT74 PE=1 SV=2	7.5891	57830	F215808.dat	Q25497_MS19-036_T4_NR15	313	6.6	6	1	8	1	0	0	0	0	0	0	0	0	0	0	0	0	0	0	0	0	0	0	0	0	0	0	0	0	0	0	0	0	0	0	0	1	0	0	0	0	0	0
K1C20_HUMAN	sp|P35900|K1C20_HUMAN Keratin, type I cytoskeletal 20 OS=Homo sapiens OX=9606 GN=KRT20 PE=1 SV=1	5.52351	48457	F215812.dat	Q25500_MS19-036_T1(Baseline)_R2	39	1.7	1	1	8	4	0	0	0	0	0	0	0	1	0	0	0	0	0	0	0	0	0	0	0	0	0	1	0	0	0	0	0	0	0	0	0	0	0	1	1	0	0	0
H2B2F_HUMAN	sp|Q5QNW6|H2B2F_HUMAN Histone H2B type 2-F OS=Homo sapiens OX=9606 GN=HIST2H2BF PE=1 SV=3	10.3146	13912	F215851.dat	Q25537_MS19-036_T3_R9	328	51.6	6	1	7	0	0	0	0	0	0	0	0	0	0	0	0	0	0	0	0	0	0	0	0	0	0	0	0	0	0	0	0	0	0	0	0	0	0	0	0	0	0	0
H2B1B_HUMAN	sp|P33778|H2B1B_HUMAN Histone H2B type 1-B OS=Homo sapiens OX=9606 GN=HIST1H2BB PE=1 SV=2	10.3146	13942	F215921.dat	Q25564_MS19-036_T4_R6	319	52.4	7	1	7	2	0	0	0	0	0	0	0	0	0	0	0	0	0	0	0	0	0	0	0	0	0	0	0	0	0	0	0	0	0	0	0	0	0	0	0	0	0	0
H2B1C_HUMAN	sp|P62807|H2B1C_HUMAN Histone H2B type 1-C/E/F/G/I OS=Homo sapiens OX=9606 GN=HIST1H2BC PE=1 SV=4	10.3146	13898	F215921.dat	Q25564_MS19-036_T4_R6	316	52.4	7	1	7	0	0	0	0	0	0	0	0	0	0	0	0	0	0	0	0	0	0	0	0	0	0	0	0	0	0	0	0	0	0	0	0	0	0	0	0	0	0	0
K2C71_HUMAN	sp|Q3SY84|K2C71_HUMAN Keratin, type II cytoskeletal 71 OS=Homo sapiens OX=9606 GN=KRT71 PE=1 SV=3	6.27452	57256	F215674.dat	Q25473_MS19-036_T1(Baseline)_NR1	157	6.3	3	1	6	1	0	0	0	0	0	0	0	0	1	0	0	0	0	0	0	0	0	0	0	0	0	0	0	0	0	0	0	0	0	0	0	0	0	0	0	0	0	0
ACTBL_HUMAN	sp|Q562R1|ACTBL_HUMAN Beta-actin-like protein 2 OS=Homo sapiens OX=9606 GN=ACTBL2 PE=1 SV=2	5.38923	41976	F215849.dat	Q25535_MS19-036_T2_R10	155	13	4	1	6	1	0	0	0	0	0	0	0	0	0	0	0	0	0	0	0	0	0	0	0	0	0	0	0	0	0	0	0	0	0	0	0	0	0	0	0	0	0	0
LDHA_HUMAN	sp|P00338|LDHA_HUMAN L-lactate dehydrogenase A chain OS=Homo sapiens OX=9606 GN=LDHA PE=1 SV=2	8.44331	36665	F215885.dat	Q25550_MS19-036_T3_NR4	108	6.6	2	1	5	32	3	0	1	1	0	0	1	0	1	0	0	0	0	1	0	0	0	0	0	1	0	0	0	0	1	0	0	0	0	1	1	0	1	0	0	1	0	0
IGHA2_HUMAN	sp|P01877|IGHA2_HUMAN Immunoglobulin heavy constant alpha 2 OS=Homo sapiens OX=9606 GN=IGHA2 PE=1 SV=4	5.85511	36568	F215846.dat	Q25532_MS19-036_T2_NR18	56	7.1	2	1	5	0	0	0	0	0	0	0	0	0	0	0	0	0	0	0	0	0	0	0	0	0	0	0	0	0	0	0	0	0	0	0	0	0	0	0	0	0	0	0
A4_HUMAN	sp|P05067|A4_HUMAN Amyloid-beta precursor protein OS=Homo sapiens OX=9606 GN=APP PE=1 SV=3	4.73043	86888	F215830.dat	Q25516_MS19-036_T1(Baseline)_NR7	50	1.7	1	1	5	7	0	0	0	0	0	0	0	1	0	0	0	0	1	0	0	0	0	0	0	0	0	0	0	0	0	1	0	0	0	0	0	0	0	0	0	0	0	0
K2C80_HUMAN	sp|Q6KB66|K2C80_HUMAN Keratin, type II cytoskeletal 80 OS=Homo sapiens OX=9606 GN=KRT80 PE=1 SV=2	5.57744	50494	F215868.dat	Q25541_MS19-036_T1(Baseline)_NR3	90	5.1	2	1	4	14	0	0	0	0	0	0	0	0	0	0	0	0	0	0	0	0	0	0	0	0	0	0	0	1	0	0	0	0	0	0	0	0	0	0	0	0	0	0
COIA1_HUMAN	sp|P39060|COIA1_HUMAN Collagen alpha-1(XVIII) chain OS=Homo sapiens OX=9606 GN=COL18A1 PE=1 SV=5	5.66889	178077	F215777.dat	Q25493_MS19-036_T1(Baseline)_NR11	74	1	1	1	4	4	0	0	0	0	0	0	0	0	0	0	0	0	0	0	0	0	0	0	0	0	0	0	0	0	0	0	0	1	0	0	0	0	0	0	0	0	0	0
POSTN_HUMAN	sp|Q15063|POSTN_HUMAN Periostin OS=Homo sapiens OX=9606 GN=POSTN PE=1 SV=2	7.26502	93255	F215922.dat	Q25565_MS19-036_T3_NR10	71	1.7	1	1	4	8	0	0	0	0	0	0	1	0	0	0	0	0	0	0	0	0	0	0	0	0	0	0	0	0	0	0	0	0	0	0	0	0	0	0	0	0	0	0
CNTN1_HUMAN	sp|Q12860|CNTN1_HUMAN Contactin-1 OS=Homo sapiens OX=9606 GN=CNTN1 PE=1 SV=1	5.61573	113249	F215825.dat	Q25511_MS19-036_T1(Baseline)_NR6	40	0.8	1	1	4	9	0	0	0	0	0	0	0	0	0	0	0	0	0	0	0	0	0	0	0	0	0	0	0	0	0	0	0	0	1	1	0	0	0	0	0	0	1	0
KPYM_HUMAN	sp|P14618|KPYM_HUMAN Pyruvate kinase PKM OS=Homo sapiens OX=9606 GN=PKM PE=1 SV=4	7.95499	57900	F215923.dat	Q25566_MS19-036_T2_NR16	83	2.4	1	1	3	35	2	0	1	0	0	0	0	1	0	0	0	0	1	0	0	1	0	1	0	0	0	0	0	0	0	1	0	0	0	1	0	0	0	0	0	0	0	0
HSP76_HUMAN	sp|P17066|HSP76_HUMAN Heat shock 70 kDa protein 6 OS=Homo sapiens OX=9606 GN=HSPA6 PE=1 SV=2	5.81263	70984	F215851.dat	Q25537_MS19-036_T3_R9	75	3.3	2	1	3	1	0	0	0	0	0	0	0	0	0	0	0	0	0	0	0	0	0	0	0	0	0	0	0	0	0	0	0	0	0	0	0	0	0	0	0	0	0	0
VINC_HUMAN	sp|P18206|VINC_HUMAN Vinculin OS=Homo sapiens OX=9606 GN=VCL PE=1 SV=4	5.50475	123722	F215924.dat	Q25567_MS19-036_T4_R14	69	1.2	1	1	3	10	0	0	0	0	0	0	0	1	0	0	0	1	0	0	0	0	0	0	0	0	1	0	0	0	0	0	0	0	0	0	0	0	0	0	0	0	0	0
K1C18_HUMAN	sp|P05783|K1C18_HUMAN Keratin, type I cytoskeletal 18 OS=Homo sapiens OX=9606 GN=KRT18 PE=1 SV=2	5.33688	48029	F215704.dat	Q25483_MS19-036_T4_R17	57	4.2	2	1	3	2	1	0	0	0	0	0	0	0	0	0	0	0	0	0	0	0	0	0	1	0	0	0	0	0	0	0	0	0	0	0	0	0	0	0	0	0	0	0
PROF1_HUMAN	sp|P07737|PROF1_HUMAN Profilin-1 OS=Homo sapiens OX=9606 GN=PFN1 PE=1 SV=2	8.43605	15045	F215666.dat	Q25465_MS19-036_T2_NR17	56	11.4	1	1	3	8	2	1	0	0	0	0	0	0	0	0	0	0	0	0	0	0	0	0	0	0	0	0	0	0	0	0	0	0	0	0	0	0	0	0	0	0	0	0
SRCRL_HUMAN	sp|A1L4H1|SRCRL_HUMAN Soluble scavenger receptor cysteine-rich domain-containing protein SSC5D OS=Homo sapiens OX=9606 GN=SSC5D PE=1 SV=3	5.71474	165639	F215834.dat	Q25520_MS19-036_T2_R17	49	1	1	1	3	5	0	1	0	0	0	0	0	0	0	0	0	0	1	0	0	0	0	0	0	1	0	0	0	0	0	0	0	0	0	0	0	0	0	0	0	0	0	0
H2B1A_HUMAN	sp|Q96A08|H2B1A_HUMAN Histone H2B type 1-A OS=Homo sapiens OX=9606 GN=HIST1H2BA PE=1 SV=3	10.3146	14159	F215904.dat	Q25560_MS19-036_T2_R8	42	7.1	1	1	3	0	0	0	0	0	0	0	0	0	0	0	0	0	0	0	0	0	0	0	0	0	0	0	0	0	0	0	0	0	0	0	0	0	0	0	0	0	0	0
SYNE2_HUMAN	sp|Q8WXH0|SYNE2_HUMAN Nesprin-2 OS=Homo sapiens OX=9606 GN=SYNE2 PE=1 SV=3	5.25648	795943	F215667.dat	Q25466_MS19-036_T3_R11	28	0.1	1	1	3	9	1	2	0	1	0	0	0	0	0	0	0	0	0	1	0	0	0	0	1	0	0	0	0	0	0	0	0	0	0	0	0	0	0	0	0	0	0	0
CTNB1_HUMAN	sp|P35222|CTNB1_HUMAN Catenin beta-1 OS=Homo sapiens OX=9606 GN=CTNNB1 PE=1 SV=1	5.52709	85442	F215851.dat	Q25537_MS19-036_T3_R9	26	2	1	1	3	1	0	0	0	0	0	0	0	0	0	0	0	0	0	0	0	0	0	0	0	0	0	0	0	0	0	0	0	0	0	0	0	0	0	0	0	0	0	0
VPS52_HUMAN	sp|Q8N1B4|VPS52_HUMAN Vacuolar protein sorting-associated protein 52 homolog OS=Homo sapiens OX=9606 GN=VPS52 PE=1 SV=1	5.70217	82170	F215975.dat	Q25578_MS19-036_T3_NR14	25	1.7	1	1	3	4	0	0	0	0	0	0	0	0	0	0	0	0	0	0	0	0	0	0	0	0	0	0	0	0	0	0	0	0	0	0	0	0	0	0	0	0	0	0
KRA92_HUMAN	sp|Q9BYQ4|KRA92_HUMAN Keratin-associated protein 9-2 OS=Homo sapiens OX=9606 GN=KRTAP9-2 PE=1 SV=2	8.14735	18273	F215851.dat	Q25537_MS19-036_T3_R9	117	18.4	2	1	2	7	0	0	0	0	0	0	0	0	0	0	0	0	0	0	0	0	0	0	0	0	0	0	0	0	0	0	0	0	0	0	0	0	0	0	0	0	0	0
KRA93_HUMAN	sp|Q9BYQ3|KRA93_HUMAN Keratin-associated protein 9-3 OS=Homo sapiens OX=9606 GN=KRTAP9-3 PE=1 SV=1	7.93378	16840	F215921.dat	Q25564_MS19-036_T4_R6	104	20.1	2	1	2	3	0	0	0	0	0	0	0	0	0	0	0	0	0	0	0	0	0	0	0	0	0	0	0	0	0	0	0	0	0	0	0	0	0	0	0	0	0	0
KRA97_HUMAN	sp|A8MTY7|KRA97_HUMAN Keratin-associated protein 9-7 OS=Homo sapiens OX=9606 GN=KRTAP9-7 PE=3 SV=1	8.00728	17778	F215851.dat	Q25537_MS19-036_T3_R9	99	18.9	2	1	2	2	0	0	0	0	0	0	0	0	0	0	0	0	0	0	0	0	0	0	0	0	0	0	0	0	0	0	0	0	0	0	0	0	0	0	0	0	0	0
HV315_HUMAN	sp|A0A0B4J1V0|HV315_HUMAN Immunoglobulin heavy variable 3-15 OS=Homo sapiens OX=9606 GN=IGHV3-15 PE=3 SV=1	8.84233	12917	F215906.dat	Q25561_MS19-036_T4_NR2	78	11.8	2	1	2	88	0	0	1	0	0	0	0	0	1	0	0	0	2	0	1	1	0	1	0	0	0	1	0	1	1	1	1	0	0	0	0	1	1	1	2	1	0	0
HV349_HUMAN	sp|A0A0A0MS15|HV349_HUMAN Immunoglobulin heavy variable 3-49 OS=Homo sapiens OX=9606 GN=IGHV3-49 PE=3 SV=1	8.84192	13048	F215906.dat	Q25561_MS19-036_T4_NR2	77	13.4	2	1	2	1	0	0	0	0	0	0	0	0	0	0	0	0	0	0	0	0	0	0	0	0	0	0	0	0	0	0	0	0	0	0	0	0	0	0	0	0	0	0
CLH1_HUMAN	sp|Q00610|CLH1_HUMAN Clathrin heavy chain 1 OS=Homo sapiens OX=9606 GN=CLTC PE=1 SV=5	5.48093	191492	F215666.dat	Q25465_MS19-036_T2_NR17	77	0.7	1	1	2	4	1	0	0	0	0	0	0	0	0	0	0	0	0	0	0	0	0	0	0	0	0	0	0	0	0	0	0	0	0	0	0	0	0	0	0	0	0	0
GRAH_HUMAN	sp|P20718|GRAH_HUMAN Granzyme H OS=Homo sapiens OX=9606 GN=GZMH PE=1 SV=1	9.82567	27297	F215673.dat	Q25472_MS19-036_T1(Baseline)_R5	71	9.3	2	1	2	1	0	0	0	0	0	0	0	1	0	0	0	0	0	0	0	0	0	0	0	0	0	0	0	0	0	0	0	0	0	0	0	0	0	0	0	0	0	0
KRA42_HUMAN	sp|Q9BYR5|KRA42_HUMAN Keratin-associated protein 4-2 OS=Homo sapiens OX=9606 GN=KRTAP4-2 PE=1 SV=2	8.3123	14450	F215921.dat	Q25564_MS19-036_T4_R6	66	40.4	2	1	2	3	0	0	0	0	0	0	0	0	0	0	0	0	0	0	0	0	0	0	0	0	0	0	0	0	0	0	0	0	0	0	0	0	0	0	0	0	0	0
NOE1_HUMAN	sp|Q99784|NOE1_HUMAN Noelin OS=Homo sapiens OX=9606 GN=OLFM1 PE=1 SV=4	6.47526	55307	F215895.dat	Q25553_MS19-036_T3_NR16	62	2.3	1	1	2	8	0	0	0	0	0	0	0	0	0	0	0	0	0	0	0	0	0	0	0	0	0	1	0	0	0	0	0	0	0	0	0	0	0	0	0	0	0	0
TSP3_HUMAN	sp|P49746|TSP3_HUMAN Thrombospondin-3 OS=Homo sapiens OX=9606 GN=THBS3 PE=1 SV=1	4.42675	104135	F215823.dat	Q25509_MS19-036_T2_R2	59	1.8	2	1	2	9	0	0	0	1	0	0	0	0	0	0	0	0	0	0	0	0	0	0	1	0	0	0	0	0	1	0	0	0	0	0	0	0	0	0	0	0	1	0
ANGI_HUMAN	sp|P03950|ANGI_HUMAN Angiogenin OS=Homo sapiens OX=9606 GN=ANG PE=1 SV=1	9.73412	16539	F215685.dat	Q25477_MS19-036_T4_NR18	58	6.1	1	1	2	78	0	0	1	0	0	0	0	0	0	0	0	0	1	0	0	0	1	1	0	0	1	1	1	0	0	0	1	1	0	1	0	1	1	1	0	1	1	1
HV323_HUMAN	sp|P01764|HV323_HUMAN Immunoglobulin heavy variable 3-23 OS=Homo sapiens OX=9606 GN=IGHV3-23 PE=1 SV=2	8.4863	12574	F215685.dat	Q25477_MS19-036_T4_NR18	52	9.4	1	1	2	1	0	0	0	0	0	0	0	0	0	0	0	0	1	0	0	0	0	0	0	0	0	0	0	0	0	0	0	0	0	0	0	0	0	0	0	0	0	0
BLMH_HUMAN	sp|Q13867|BLMH_HUMAN Bleomycin hydrolase OS=Homo sapiens OX=9606 GN=BLMH PE=1 SV=1	5.87126	52528	F215851.dat	Q25537_MS19-036_T3_R9	52	2.4	1	1	2	9	0	0	0	0	0	0	0	0	0	0	0	0	0	0	0	1	0	0	0	0	0	0	0	0	0	0	0	0	0	0	0	0	0	0	1	0	0	0
TBB5_HUMAN	sp|P07437|TBB5_HUMAN Tubulin beta chain OS=Homo sapiens OX=9606 GN=TUBB PE=1 SV=2	4.78032	49639	F215921.dat	Q25564_MS19-036_T4_R6	43	2	1	1	2	1	0	0	0	0	0	0	0	0	0	0	0	0	0	0	0	0	0	0	0	0	0	0	0	0	0	0	0	0	0	0	0	0	0	0	0	0	0	0
TENA_HUMAN	sp|P24821|TENA_HUMAN Tenascin OS=Homo sapiens OX=9606 GN=TNC PE=1 SV=3	4.78595	240700	F215839.dat	Q25525_MS19-036_T2_R13	42	0.4	1	1	2	6	0	0	0	0	0	0	0	2	0	0	0	0	0	0	0	0	0	0	0	0	0	0	0	0	0	1	0	0	0	0	0	0	0	0	0	0	0	0
TBB2A_HUMAN	sp|Q13885|TBB2A_HUMAN Tubulin beta-2A chain OS=Homo sapiens OX=9606 GN=TUBB2A PE=1 SV=1	4.78032	49875	F215921.dat	Q25564_MS19-036_T4_R6	42	2	1	1	2	2	0	0	0	0	0	0	0	0	0	0	0	0	0	0	0	0	0	0	0	0	0	0	0	0	0	0	0	0	0	0	0	0	0	0	0	0	0	0
PAFA_HUMAN	sp|Q13093|PAFA_HUMAN Platelet-activating factor acetylhydrolase OS=Homo sapiens OX=9606 GN=PLA2G7 PE=1 SV=1	7.23286	50045	F215984.dat	Q25584_MS19-036_T4_R8	41	4.8	1	1	2	4	0	0	0	0	0	0	0	0	0	0	0	0	0	0	0	0	0	0	0	0	0	0	0	0	0	0	0	0	0	0	0	0	0	0	0	0	0	0
PARK7_HUMAN	sp|Q99497|PARK7_HUMAN Protein/nucleic acid deglycase DJ-1 OS=Homo sapiens OX=9606 GN=PARK7 PE=1 SV=2	6.32922	19878	F215924.dat	Q25567_MS19-036_T4_R14	40	3.7	1	1	2	4	0	0	0	0	0	0	0	0	0	0	0	0	0	0	0	0	0	0	0	0	0	0	0	0	0	0	0	0	0	0	0	0	0	0	0	0	0	0
DLG5_HUMAN	sp|Q8TDM6|DLG5_HUMAN Disks large homolog 5 OS=Homo sapiens OX=9606 GN=DLG5 PE=1 SV=4	7.10303	213735	F215838.dat	Q25524_MS19-036_T4_R3	39	0.4	1	1	2	52	0	0	0	0	0	0	0	0	0	0	0	0	0	0	0	1	0	0	0	0	0	0	1	1	0	1	0	1	0	1	0	0	0	0	0	1	0	0
DYH5_HUMAN	sp|Q8TE73|DYH5_HUMAN Dynein heavy chain 5, axonemal OS=Homo sapiens OX=9606 GN=DNAH5 PE=1 SV=3	5.79254	528684	F215827.dat	Q25513_MS19-036_T2_R11	37	0.2	1	1	2	5	0	0	0	0	1	0	0	0	0	0	0	0	0	0	0	0	0	0	0	0	0	0	0	0	0	0	0	0	0	0	0	0	0	0	0	0	1	0
DSG2_HUMAN	sp|Q14126|DSG2_HUMAN Desmoglein-2 OS=Homo sapiens OX=9606 GN=DSG2 PE=1 SV=2	5.12531	122218	F215902.dat	Q25559_MS19-036_T4_NR7	36	0.6	1	1	2	3	0	0	0	0	0	0	0	0	0	0	0	0	0	0	0	0	1	0	0	0	0	0	0	0	0	0	0	0	0	0	0	0	0	0	0	0	0	0
GANAB_HUMAN	sp|Q14697|GANAB_HUMAN Neutral alpha-glucosidase AB OS=Homo sapiens OX=9606 GN=GANAB PE=1 SV=3	5.73647	106807	F215810.dat	Q25499_MS19-036_T2_R15	35	1	1	1	2	4	0	0	0	0	0	0	0	0	0	0	0	0	0	0	0	0	0	0	0	0	0	0	0	0	0	0	0	0	0	0	0	0	0	1	0	0	1	0
PGK1_HUMAN	sp|P00558|PGK1_HUMAN Phosphoglycerate kinase 1 OS=Homo sapiens OX=9606 GN=PGK1 PE=1 SV=3	8.30228	44586	F215881.dat	Q25549_MS19-036_T4_NR4	35	3.6	1	1	2	1	1	0	0	0	0	0	0	0	0	0	0	0	0	0	0	0	0	0	0	0	0	0	0	0	0	0	0	0	0	0	0	0	0	0	0	0	0	0
HBAZ_HUMAN	sp|P02008|HBAZ_HUMAN Hemoglobin subunit zeta OS=Homo sapiens OX=9606 GN=HBZ PE=1 SV=2	7.9371	15627	F215829.dat	Q25515_MS19-036_T2_R16	33	4.9	1	1	2	0	0	0	0	0	0	0	0	0	0	0	0	0	0	0	0	0	0	0	0	0	0	0	0	0	0	0	0	0	0	0	0	0	0	0	0	0	0	0
KRA49_HUMAN	sp|Q9BYQ8|KRA49_HUMAN Keratin-associated protein 4-9 OS=Homo sapiens OX=9606 GN=KRTAP4-9 PE=2 SV=2	8.28674	22387	F215851.dat	Q25537_MS19-036_T3_R9	32	13.3	1	1	2	0	0	0	0	0	0	0	0	0	0	0	0	0	0	0	0	0	0	0	0	0	0	0	0	0	0	0	0	0	0	0	0	0	0	0	0	0	0	0
GOGB1_HUMAN	sp|Q14789|GOGB1_HUMAN Golgin subfamily B member 1 OS=Homo sapiens OX=9606 GN=GOLGB1 PE=1 SV=2	4.95642	375790	F215668.dat	Q25467_MS19-036_T4_R18	32	0.2	1	1	2	5	0	0	1	0	0	0	0	0	0	0	0	0	0	0	0	0	0	0	0	0	0	0	0	0	0	0	0	0	0	0	0	0	0	0	0	0	0	0
ACE_HUMAN	sp|P12821|ACE_HUMAN Angiotensin-converting enzyme OS=Homo sapiens OX=9606 GN=ACE PE=1 SV=1	5.94835	149620	F215862.dat	Q25539_MS19-036_T1(Baseline)_R1	31	0.6	1	1	2	3	0	0	0	0	0	0	0	0	0	0	0	0	0	0	0	0	0	0	0	0	0	0	0	0	1	0	0	0	0	0	0	0	0	0	0	0	0	0
COL10_HUMAN	sp|Q9Y6Z7|COL10_HUMAN Collectin-10 OS=Homo sapiens OX=9606 GN=COLEC10 PE=1 SV=2	6.95581	30685	F215921.dat	Q25564_MS19-036_T4_R6	30	2.5	1	1	2	4	0	0	0	0	0	0	0	0	0	0	0	0	0	0	0	0	0	0	0	0	0	0	0	0	0	0	0	0	0	0	0	0	0	0	0	0	0	0
LRC31_HUMAN	sp|Q6UY01|LRC31_HUMAN Leucine-rich repeat-containing protein 31 OS=Homo sapiens OX=9606 GN=LRRC31 PE=2 SV=1	5.71413	61450	F215947.dat	Q25572_MS19-036_T4_R10	30	1.3	1	1	2	6	0	0	0	0	0	0	0	0	0	0	0	0	1	0	0	0	0	0	0	0	0	0	0	0	0	0	0	0	0	0	0	0	0	0	0	0	0	0
SMC3_HUMAN	sp|Q9UQE7|SMC3_HUMAN Structural maintenance of chromosomes protein 3 OS=Homo sapiens OX=9606 GN=SMC3 PE=1 SV=2	6.76591	141454	F215820.dat	Q25506_MS19-036_T4_R4	30	0.8	1	1	2	9	0	0	0	0	0	0	0	0	0	0	0	0	0	0	0	0	0	0	0	0	0	1	0	0	0	0	0	0	0	0	0	0	0	0	0	0	0	0
XPP3_HUMAN	sp|Q9NQH7|XPP3_HUMAN Xaa-Pro aminopeptidase 3 OS=Homo sapiens OX=9606 GN=XPNPEP3 PE=1 SV=1	6.37456	56997	F215851.dat	Q25537_MS19-036_T3_R9	30	1.4	1	1	2	1	0	0	0	0	0	0	0	0	0	0	0	0	0	0	0	0	0	0	0	0	0	0	0	0	0	0	0	0	0	0	0	0	0	0	0	0	0	0
FILA_HUMAN	sp|P20930|FILA_HUMAN Filaggrin OS=Homo sapiens OX=9606 GN=FLG PE=1 SV=3	9.24191	434922	F215947.dat	Q25572_MS19-036_T4_R10	30	0.2	1	1	2	18	0	0	0	0	0	0	0	0	0	0	0	0	1	0	0	0	0	0	0	0	0	0	0	0	0	1	1	1	0	0	0	0	0	1	1	0	0	0
RELN_HUMAN	sp|P78509|RELN_HUMAN Reelin OS=Homo sapiens OX=9606 GN=RELN PE=1 SV=3	5.54212	388137	F215837.dat	Q25523_MS19-036_T4_NR14	29	0.2	1	1	2	3	0	0	0	0	0	0	0	0	0	0	0	0	0	0	0	0	0	0	0	0	0	0	0	0	0	0	0	0	0	0	0	0	0	0	0	0	0	0
LAMA3_HUMAN	sp|Q16787|LAMA3_HUMAN Laminin subunit alpha-3 OS=Homo sapiens OX=9606 GN=LAMA3 PE=1 SV=2	7.02758	366414	F215704.dat	Q25483_MS19-036_T4_R17	28	0.2	1	1	2	1	0	0	0	0	0	0	0	0	0	0	0	0	0	0	0	0	0	0	1	0	0	0	0	0	0	0	0	0	0	0	0	0	0	0	0	0	0	0
MPRI_HUMAN	sp|P11717|MPRI_HUMAN Cation-independent mannose-6-phosphate receptor OS=Homo sapiens OX=9606 GN=IGF2R PE=1 SV=3	5.63853	274199	F215926.dat	Q25569_MS19-036_T4_NR10	28	0.4	1	1	2	3	0	0	0	0	0	0	0	0	0	0	0	0	0	0	0	0	0	0	0	0	0	0	0	0	0	0	0	0	0	0	0	0	0	0	0	0	0	0
GOGA4_HUMAN	sp|Q13439|GOGA4_HUMAN Golgin subfamily A member 4 OS=Homo sapiens OX=9606 GN=GOLGA4 PE=1 SV=1	5.32814	260980	F215840.dat	Q25526_MS19-036_T1(Baseline)_NR15	28	0.4	1	1	2	6	1	0	0	1	0	0	0	0	0	0	0	0	1	0	1	0	0	0	0	0	0	0	0	0	0	0	0	0	0	0	0	0	0	0	0	0	0	0
RD21L_HUMAN	sp|Q9H4I0|RD21L_HUMAN Double-strand-break repair protein rad21-like protein 1 OS=Homo sapiens OX=9606 GN=RAD21L1 PE=2 SV=3	5.07133	63284	F215978.dat	Q25580_MS19-036_T4_R16	27	1.6	1	1	2	11	1	0	0	0	0	0	0	0	0	0	0	0	0	0	0	0	0	0	1	0	1	0	0	0	0	0	0	0	0	0	0	0	0	0	0	0	0	0
TKT_HUMAN	sp|P29401|TKT_HUMAN Transketolase OS=Homo sapiens OX=9606 GN=TKT PE=1 SV=3	7.57898	67835	F215819.dat	Q25505_MS19-036_T2_R6	27	1.6	1	1	2	2	0	0	0	0	0	0	0	0	0	0	0	0	0	0	0	0	0	0	0	0	0	0	0	0	0	0	0	0	0	0	0	0	0	0	0	0	0	0
REV3L_HUMAN	sp|O60673|REV3L_HUMAN DNA polymerase zeta catalytic subunit OS=Homo sapiens OX=9606 GN=REV3L PE=1 SV=2	8.72185	352554	F215922.dat	Q25565_MS19-036_T3_NR10	27	0.3	1	1	2	5	0	0	0	0	0	0	0	0	0	0	0	0	0	0	0	0	0	0	0	0	0	0	0	0	0	0	0	0	0	0	0	0	0	0	0	0	0	0
RA1L2_HUMAN	sp|Q32P51|RA1L2_HUMAN Heterogeneous nuclear ribonucleoprotein A1-like 2 OS=Homo sapiens OX=9606 GN=HNRNPA1L2 PE=2 SV=2	9.08279	34204	F215921.dat	Q25564_MS19-036_T4_R6	26	2.2	1	1	2	1	0	0	0	0	0	0	0	0	0	0	0	0	0	0	0	0	0	0	0	1	0	0	0	0	0	0	0	0	0	0	0	0	0	0	0	0	0	0
NVL_HUMAN	sp|O15381|NVL_HUMAN Nuclear valosin-containing protein-like OS=Homo sapiens OX=9606 GN=NVL PE=1 SV=1	6.10798	94991	F215733.dat	Q25485_MS19-036_T1(Baseline)_NR14	25	0.8	1	1	2	7	1	0	0	0	0	0	0	0	0	0	0	0	0	0	0	0	0	0	0	0	1	0	0	0	0	0	0	0	0	0	0	0	0	0	0	0	0	0
MYPT1_HUMAN	sp|O14974|MYPT1_HUMAN Protein phosphatase 1 regulatory subunit 12A OS=Homo sapiens OX=9606 GN=PPP1R12A PE=1 SV=1	5.31112	115211	F215927.dat	Q25570_MS19-036_T4_R11	25	0.9	1	1	2	1	0	0	0	0	0	0	0	0	0	0	0	0	0	0	0	0	0	0	0	0	0	0	0	0	0	0	0	0	0	0	0	0	0	0	0	0	0	0
AGRIN_HUMAN	sp|O00468|AGRIN_HUMAN Agrin OS=Homo sapiens OX=9606 GN=AGRN PE=1 SV=6	6.00524	217179	F215818.dat	Q25504_MS19-036_T1(Baseline)_NR10	24	0.4	1	1	2	2	0	0	0	0	0	0	0	0	0	0	0	0	0	0	0	0	0	0	0	0	0	0	0	0	0	0	0	0	0	0	0	0	0	0	0	0	0	0
UBP31_HUMAN	sp|Q70CQ4|UBP31_HUMAN Ubiquitin carboxyl-terminal hydrolase 31 OS=Homo sapiens OX=9606 GN=USP31 PE=2 SV=2	9.35355	146560	F215818.dat	Q25504_MS19-036_T1(Baseline)_NR10	24	0.5	1	1	2	3	0	0	0	0	0	0	0	0	0	0	0	0	0	0	0	0	0	0	0	0	0	0	1	0	0	0	0	0	0	0	0	0	0	0	0	0	0	0
AN30A_HUMAN	sp|Q9BXX3|AN30A_HUMAN Ankyrin repeat domain-containing protein 30A OS=Homo sapiens OX=9606 GN=ANKRD30A PE=2 SV=3	6.07956	158735	F215666.dat	Q25465_MS19-036_T2_NR17	24	0.5	1	1	2	2	1	0	0	0	0	0	0	0	0	0	0	0	0	0	0	0	0	0	0	0	0	0	0	0	0	0	0	0	0	0	0	0	0	0	0	0	0	0
LRP1B_HUMAN	sp|Q9NZR2|LRP1B_HUMAN Low-density lipoprotein receptor-related protein 1B OS=Homo sapiens OX=9606 GN=LRP1B PE=1 SV=2	5.09244	515159	F215704.dat	Q25483_MS19-036_T4_R17	24	0.2	1	1	2	25	0	0	0	0	0	0	0	0	0	0	0	0	1	0	1	0	1	0	1	0	0	0	0	0	1	0	0	0	0	0	1	0	0	0	0	0	0	1
CP250_HUMAN	sp|Q9BV73|CP250_HUMAN Centrosome-associated protein CEP250 OS=Homo sapiens OX=9606 GN=CEP250 PE=1 SV=2	4.99742	280967	F215838.dat	Q25524_MS19-036_T4_R3	23	0.4	1	1	2	2	0	0	0	0	0	0	0	0	0	0	0	0	0	0	0	0	0	0	0	0	0	0	0	0	0	0	0	1	0	0	0	0	0	0	0	0	0	0
PF4V_HUMAN	sp|P10720|PF4V_HUMAN Platelet factor 4 variant OS=Homo sapiens OX=9606 GN=PF4V1 PE=1 SV=1	9.29901	11545	F215671.dat	Q25470_MS19-036_T1(Baseline)_NR17	23	14.4	1	1	2	0	0	0	0	0	0	0	0	0	0	0	0	0	0	0	0	0	0	0	0	0	0	0	0	0	0	0	0	0	0	0	0	0	0	0	0	0	0	0
KT222_HUMAN	sp|Q8N1A0|KT222_HUMAN Keratin-like protein KRT222 OS=Homo sapiens OX=9606 GN=KRT222 PE=2 SV=1	5.63081	34137	F216014.dat	Q25574_MS19-036_T3_NR6	23	4.1	1	1	2	1	0	0	0	0	0	0	0	0	0	0	0	0	0	0	0	0	0	0	0	0	0	0	0	0	0	0	0	0	0	0	0	0	0	0	0	0	0	0
C2CD2_HUMAN	sp|Q9Y426|C2CD2_HUMAN C2 domain-containing protein 2 OS=Homo sapiens OX=9606 GN=C2CD2 PE=1 SV=2	6.47086	75486	F215923.dat	Q25566_MS19-036_T2_NR16	23	1.9	1	1	2	1	0	0	0	0	0	0	0	0	0	0	0	0	0	0	0	0	0	0	0	0	0	0	0	0	0	0	0	0	0	0	0	0	0	0	0	0	0	0
AKAP9_HUMAN	sp|Q99996|AKAP9_HUMAN A-kinase anchor protein 9 OS=Homo sapiens OX=9606 GN=AKAP9 PE=1 SV=4	4.94712	452708	F215793.dat	Q25496_MS19-036_T3_R18	23	0.2	1	1	2	21	0	1	0	0	0	0	1	0	0	0	0	0	0	0	0	0	1	0	0	0	0	0	0	1	0	0	1	0	0	1	1	1	1	0	1	0	0	0
RB15B_HUMAN	sp|Q8NDT2|RB15B_HUMAN Putative RNA-binding protein 15B OS=Homo sapiens OX=9606 GN=RBM15B PE=1 SV=3	9.86222	97147	F215669.dat	Q25468_MS19-036_T3_R7	23	0.8	1	1	2	2	0	0	0	1	0	0	0	0	0	0	0	0	0	0	0	0	0	0	1	0	0	0	0	0	0	0	0	0	0	0	0	0	0	0	0	0	0	0
MYH10_HUMAN	sp|P35580|MYH10_HUMAN Myosin-10 OS=Homo sapiens OX=9606 GN=MYH10 PE=1 SV=3	5.43615	228858	F215818.dat	Q25504_MS19-036_T1(Baseline)_NR10	22	0.5	1	1	2	5	0	0	0	0	0	0	0	0	0	0	0	0	0	0	0	0	0	0	0	0	0	0	0	0	0	0	0	0	0	0	1	0	0	0	0	0	0	0
LV39_HUMAN	sp|A0A075B6K5|LV39_HUMAN Immunoglobulin lambda variable 3-9 OS=Homo sapiens OX=9606 GN=IGLV3-9 PE=3 SV=1	6.80813	12324	F215925.dat	Q25568_MS19-036_T4_NR6	123	13.9	1	1	1	9	0	0	0	0	0	0	0	0	0	0	0	0	1	0	0	0	0	0	0	0	0	0	0	0	0	0	1	0	0	0	0	0	0	0	0	0	0	0
TRY3_HUMAN	sp|P35030|TRY3_HUMAN Trypsin-3 OS=Homo sapiens OX=9606 GN=PRSS3 PE=1 SV=2	7.46391	32508	F215733.dat	Q25485_MS19-036_T1(Baseline)_NR14	86	4.3	1	1	1	0	0	0	0	0	0	0	0	0	0	0	0	0	0	0	0	0	0	0	0	0	0	0	0	0	0	0	0	0	0	0	0	0	0	0	0	0	0	0
LC1L1_HUMAN	sp|Q5VSP4|LC1L1_HUMAN Putative lipocalin 1-like protein 1 OS=Homo sapiens OX=9606 GN=LCN1P1 PE=5 SV=1	4.93352	17907	F215833.dat	Q25519_MS19-036_T2_R7	83	6.8	1	1	1	3	0	0	0	0	0	0	0	0	0	0	0	0	0	0	0	0	0	0	0	0	0	0	0	0	0	0	0	0	0	0	0	0	0	0	0	0	0	0
PARVB_HUMAN	sp|Q9HBI1|PARVB_HUMAN Beta-parvin OS=Homo sapiens OX=9606 GN=PARVB PE=1 SV=1	6.25771	41688	F215924.dat	Q25567_MS19-036_T4_R14	80	3.8	1	1	1	3	0	0	0	0	0	0	0	0	0	0	0	0	0	0	0	0	0	0	0	0	0	0	0	0	0	0	0	0	0	0	0	0	0	0	0	0	0	0
ADH1A_HUMAN	sp|P07327|ADH1A_HUMAN Alcohol dehydrogenase 1A OS=Homo sapiens OX=9606 GN=ADH1A PE=1 SV=2	8.25842	39832	F215947.dat	Q25572_MS19-036_T4_R10	77	5.3	1	1	1	1	0	0	0	0	0	0	0	0	0	0	0	0	0	0	0	0	0	0	0	0	0	0	0	0	0	0	0	0	0	0	0	0	0	0	0	0	0	0
CAD13_HUMAN	sp|P55290|CAD13_HUMAN Cadherin-13 OS=Homo sapiens OX=9606 GN=CDH13 PE=1 SV=1	4.80067	78238	F215980.dat	Q25581_MS19-036_T4_NR5	76	1.7	1	1	1	67	0	0	0	0	1	0	0	1	0	0	0	0	1	0	0	0	0	1	0	0	0	1	0	0	0	1	1	0	1	0	0	0	1	1	1	1	1	0
CBPQ_HUMAN	sp|Q9Y646|CBPQ_HUMAN Carboxypeptidase Q OS=Homo sapiens OX=9606 GN=CPQ PE=1 SV=1	5.78912	51855	F215978.dat	Q25580_MS19-036_T4_R16	75	1.9	1	1	1	14	0	0	0	0	0	0	0	0	0	0	0	0	0	0	0	0	0	0	0	0	0	0	0	0	0	0	0	0	0	0	0	0	0	0	0	0	0	0
HVD34_HUMAN	sp|P0DP06|HVD34_HUMAN Immunoglobulin heavy variable 4-30-4 OS=Homo sapiens OX=9606 GN=IGHV4-30-4 PE=3 SV=1	9.32866	13148	F215906.dat	Q25561_MS19-036_T4_NR2	74	13.6	1	1	1	0	0	0	0	0	0	0	0	0	0	0	0	0	0	0	0	0	0	0	0	0	0	0	0	0	0	0	0	0	0	0	0	0	0	0	0	0	0	0
IDHC_HUMAN	sp|O75874|IDHC_HUMAN Isocitrate dehydrogenase [NADP] cytoplasmic OS=Homo sapiens OX=9606 GN=IDH1 PE=1 SV=2	6.53277	46630	F215956.dat	Q25573_MS19-036_T3_NR17	71	3.1	1	1	1	2	0	0	0	0	0	0	0	0	0	0	0	0	0	0	0	0	0	0	0	0	0	0	0	0	0	0	0	0	0	0	0	0	0	0	0	0	0	0
PSPB_HUMAN	sp|P07988|PSPB_HUMAN Pulmonary surfactant-associated protein B OS=Homo sapiens OX=9606 GN=SFTPB PE=1 SV=3	5.26982	42089	F215877.dat	Q25547_MS19-036_T3_NR12	71	3.1	1	1	1	7	0	0	0	0	0	0	0	0	0	0	0	0	0	0	0	0	0	0	0	0	0	0	0	0	0	1	0	0	0	1	0	0	0	0	0	0	0	0
HV102_HUMAN	sp|P23083|HV102_HUMAN Immunoglobulin heavy variable 1-2 OS=Homo sapiens OX=9606 GN=IGHV1-2 PE=1 SV=2	9.22913	13076	F215906.dat	Q25561_MS19-036_T4_NR2	68	9.4	1	1	1	2	0	0	0	0	0	0	0	0	0	0	0	0	1	0	0	0	0	0	0	0	0	0	0	0	0	0	0	0	0	0	0	0	0	0	0	0	0	0
KVD26_HUMAN	sp|A0A0A0MRZ7|KVD26_HUMAN Immunoglobulin kappa variable 2D-26 OS=Homo sapiens OX=9606 GN=IGKV2D-26 PE=3 SV=1	4.90249	13289	F215848.dat	Q25534_MS19-036_T3_R14	67	10.8	1	1	1	13	0	0	0	0	0	0	0	0	0	0	0	0	2	0	0	0	0	0	0	0	0	0	0	0	0	0	0	0	0	0	0	0	0	0	0	0	0	0
IBP4_HUMAN	sp|P22692|IBP4_HUMAN Insulin-like growth factor-binding protein 4 OS=Homo sapiens OX=9606 GN=IGFBP4 PE=1 SV=2	6.80854	27915	F215885.dat	Q25550_MS19-036_T3_NR4	67	6.6	1	1	1	33	0	0	0	0	1	0	0	0	1	0	0	0	0	0	0	1	0	0	0	0	0	0	0	1	0	1	1	0	0	0	0	0	0	1	0	0	0	0
ANXA1_HUMAN	sp|P04083|ANXA1_HUMAN Annexin A1 OS=Homo sapiens OX=9606 GN=ANXA1 PE=1 SV=2	6.56855	38690	F215921.dat	Q25564_MS19-036_T4_R6	65	4.6	1	1	1	2	0	0	0	0	0	0	0	0	0	1	0	0	0	0	0	0	0	0	0	0	0	0	0	0	0	0	0	0	0	0	0	0	0	0	0	0	0	0
KRA41_HUMAN	sp|Q9BYQ7|KRA41_HUMAN Keratin-associated protein 4-1 OS=Homo sapiens OX=9606 GN=KRTAP4-1 PE=2 SV=3	8.15113	15228	F215851.dat	Q25537_MS19-036_T3_R9	64	8.9	1	1	1	1	0	0	0	0	0	0	0	0	0	0	0	0	0	0	0	0	0	0	0	0	0	0	0	0	0	0	0	0	0	0	0	0	0	0	0	0	0	0
KR10A_HUMAN	sp|P60014|KR10A_HUMAN Keratin-associated protein 10-10 OS=Homo sapiens OX=9606 GN=KRTAP10-10 PE=2 SV=1	7.35074	25551	F215851.dat	Q25537_MS19-036_T3_R9	64	9.2	1	1	1	5	0	0	0	0	0	0	0	0	0	0	0	0	0	0	0	0	0	0	0	0	0	0	0	0	0	0	0	0	0	0	0	0	0	0	0	0	0	0
CDHR2_HUMAN	sp|Q9BYE9|CDHR2_HUMAN Cadherin-related family member 2 OS=Homo sapiens OX=9606 GN=CDHR2 PE=1 SV=2	4.31214	141455	F215808.dat	Q25497_MS19-036_T4_NR15	63	1	1	1	1	1	0	0	0	0	0	0	0	0	0	0	0	0	0	0	0	0	0	0	0	0	0	0	0	0	0	0	0	0	0	0	0	1	0	0	0	0	0	0
KR103_HUMAN	sp|P60369|KR103_HUMAN Keratin-associated protein 10-3 OS=Homo sapiens OX=9606 GN=KRTAP10-3 PE=2 SV=2	7.9873	22331	F215851.dat	Q25537_MS19-036_T3_R9	61	5.9	1	1	1	1	0	0	0	0	0	0	0	0	0	0	0	0	0	0	0	0	0	0	0	0	0	0	0	0	0	0	0	0	0	0	0	0	0	0	0	0	0	0
PPIB_HUMAN	sp|P23284|PPIB_HUMAN Peptidyl-prolyl cis-trans isomerase B OS=Homo sapiens OX=9606 GN=PPIB PE=1 SV=2	9.42077	23728	F215878.dat	Q25548_MS19-036_T4_NR9	60	6	1	1	1	3	2	0	0	0	0	0	0	0	0	0	0	0	0	0	0	0	0	0	0	0	0	0	0	0	0	0	0	0	0	0	0	0	0	0	0	0	0	0
DEF1_HUMAN	sp|P59665|DEF1_HUMAN Neutrophil defensin 1 OS=Homo sapiens OX=9606 GN=DEFA1 PE=1 SV=1	6.53517	10194	F215973.dat	Q25577_MS19-036_T4_R15	58	9.6	1	1	1	8	0	0	0	0	0	0	0	0	0	0	0	0	0	0	0	0	0	0	0	0	0	0	0	0	0	0	0	0	0	0	0	0	0	0	0	0	0	0
LEG7_HUMAN	sp|P47929|LEG7_HUMAN Galectin-7 OS=Homo sapiens OX=9606 GN=LGALS7 PE=1 SV=2	7.0242	15066	F215921.dat	Q25564_MS19-036_T4_R6	58	8.1	1	1	1	1	0	0	0	0	0	0	0	0	0	0	0	0	0	0	0	0	0	0	0	0	0	0	0	0	0	0	0	0	0	0	0	0	0	0	0	0	0	0
PGRP1_HUMAN	sp|O75594|PGRP1_HUMAN Peptidoglycan recognition protein 1 OS=Homo sapiens OX=9606 GN=PGLYRP1 PE=1 SV=1	8.91804	21717	F215924.dat	Q25567_MS19-036_T4_R14	57	7.7	1	1	1	1	0	0	0	0	0	0	0	0	0	0	0	0	0	0	0	0	0	0	0	0	0	0	0	0	0	0	0	0	0	0	0	0	0	0	0	0	0	0
F16P1_HUMAN	sp|P09467|F16P1_HUMAN Fructose-1,6-bisphosphatase 1 OS=Homo sapiens OX=9606 GN=FBP1 PE=1 SV=5	6.53967	36819	F215956.dat	Q25573_MS19-036_T3_NR17	56	4.7	1	1	1	2	0	0	0	0	0	0	0	0	0	0	0	0	0	0	0	0	0	0	0	0	0	0	0	0	0	0	0	0	0	0	0	0	0	0	0	0	0	0
GTR2_HUMAN	sp|P11168|GTR2_HUMAN Solute carrier family 2, facilitated glucose transporter member 2 OS=Homo sapiens OX=9606 GN=SLC2A2 PE=1 SV=1	8.09091	57452	F215847.dat	Q25533_MS19-036_T2_R18	56	1.5	1	1	1	202	1	0	2	0	1	0	0	0	0	0	0	1	1	1	0	1	3	2	1	1	1	2	3	2	2	2	2	3	3	1	2	1	1	3	1	0	2	1
TIE1_HUMAN	sp|P35590|TIE1_HUMAN Tyrosine-protein kinase receptor Tie-1 OS=Homo sapiens OX=9606 GN=TIE1 PE=1 SV=1	6.63331	125010	F215984.dat	Q25584_MS19-036_T4_R8	54	1.1	1	1	1	1	0	0	0	0	0	0	0	0	0	0	0	0	0	0	0	0	0	0	0	0	0	0	0	0	0	0	0	0	0	0	0	0	0	0	0	0	0	0
EF1G_HUMAN	sp|P26641|EF1G_HUMAN Elongation factor 1-gamma OS=Homo sapiens OX=9606 GN=EEF1G PE=1 SV=3	6.24988	50087	F215666.dat	Q25465_MS19-036_T2_NR17	54	2.3	1	1	1	1	1	0	0	0	0	0	0	0	0	0	0	0	0	0	0	0	0	0	0	0	0	0	0	0	0	0	0	0	0	0	0	0	0	0	0	0	0	0
BRPF1_HUMAN	sp|P55201|BRPF1_HUMAN Peregrin OS=Homo sapiens OX=9606 GN=BRPF1 PE=1 SV=2	8.15726	137412	F215691.dat	Q25482_MS19-036_T1(Baseline)_NR2	53	0.7	1	1	1	9	0	0	0	0	0	0	0	0	0	0	0	0	0	0	0	0	0	4	0	0	0	0	0	0	0	0	0	0	0	0	0	0	0	0	0	0	0	0
KV320_HUMAN	sp|P01619|KV320_HUMAN Immunoglobulin kappa variable 3-20 OS=Homo sapiens OX=9606 GN=IGKV3-20 PE=1 SV=2	4.85322	12549	F215906.dat	Q25561_MS19-036_T4_NR2	53	7.8	1	1	1	9	0	0	0	0	0	0	0	0	0	0	0	0	1	0	0	0	0	0	0	0	0	0	0	0	0	0	0	0	0	0	0	0	0	0	0	0	0	0
ADT1_HUMAN	sp|P12235|ADT1_HUMAN ADP/ATP translocase 1 OS=Homo sapiens OX=9606 GN=SLC25A4 PE=1 SV=4	9.77685	33043	F215666.dat	Q25465_MS19-036_T2_NR17	53	4	1	1	1	2	1	1	0	0	0	0	0	0	0	0	0	0	0	0	0	0	0	0	0	0	0	0	0	0	0	0	0	0	0	0	0	0	0	0	0	0	0	0
PGK2_HUMAN	sp|P07205|PGK2_HUMAN Phosphoglycerate kinase 2 OS=Homo sapiens OX=9606 GN=PGK2 PE=1 SV=3	8.7446	44767	F215924.dat	Q25567_MS19-036_T4_R14	53	3.6	1	1	1	0	0	0	0	0	0	0	0	0	0	0	0	0	0	0	0	0	0	0	0	0	0	0	0	0	0	0	0	0	0	0	0	0	0	0	0	0	0	0
SETLP_HUMAN	sp|P0DME0|SETLP_HUMAN Protein SETSIP OS=Homo sapiens OX=9606 GN=SETSIP PE=1 SV=1	4.19974	34861	F215666.dat	Q25465_MS19-036_T2_NR17	52	4.6	1	1	1	1	1	0	0	0	0	0	0	0	0	0	0	0	0	0	0	0	0	0	0	0	0	0	0	0	0	0	0	0	0	0	0	0	0	0	0	0	0	0
ACTN1_HUMAN	sp|P12814|ACTN1_HUMAN Alpha-actinin-1 OS=Homo sapiens OX=9606 GN=ACTN1 PE=1 SV=2	5.24825	102993	F215924.dat	Q25567_MS19-036_T4_R14	51	1.2	1	1	1	6	0	0	0	0	0	0	0	0	0	0	0	0	0	0	0	0	0	0	0	0	0	0	0	0	0	0	0	0	0	0	0	0	0	0	0	0	0	0
NFL_HUMAN	sp|P07196|NFL_HUMAN Neurofilament light polypeptide OS=Homo sapiens OX=9606 GN=NEFL PE=1 SV=3	4.63643	61479	F215975.dat	Q25578_MS19-036_T3_NR14	51	1.5	1	1	1	1	0	0	0	0	0	0	0	0	0	0	0	0	0	0	0	0	0	0	0	0	0	0	0	0	0	0	0	0	0	0	0	0	0	0	0	0	0	0
SODE_HUMAN	sp|P08294|SODE_HUMAN Extracellular superoxide dismutase [Cu-Zn] OS=Homo sapiens OX=9606 GN=SOD3 PE=1 SV=2	6.13395	25835	F215875.dat	Q25545_MS19-036_T3_NR13	50	6.7	1	1	1	16	0	0	0	0	0	0	0	0	0	0	0	0	0	0	0	0	0	0	0	0	0	0	0	0	0	0	0	0	0	0	0	0	0	0	0	0	0	0
UTRO_HUMAN	sp|P46939|UTRO_HUMAN Utrophin OS=Homo sapiens OX=9606 GN=UTRN PE=1 SV=2	5.20061	394220	F215885.dat	Q25550_MS19-036_T3_NR4	50	0.2	1	1	1	6	0	0	0	0	0	0	0	0	0	0	0	0	0	0	0	0	0	0	0	0	0	0	0	0	0	0	0	0	0	0	0	0	0	0	0	0	0	0
PSA3_HUMAN	sp|P25788|PSA3_HUMAN Proteasome subunit alpha type-3 OS=Homo sapiens OX=9606 GN=PSMA3 PE=1 SV=2	5.18977	28415	F215956.dat	Q25573_MS19-036_T3_NR17	50	4.7	1	1	1	1	0	0	0	0	0	0	0	0	0	0	0	0	0	0	0	0	0	0	0	0	0	0	0	0	0	0	0	0	0	0	0	0	0	0	0	0	0	0
MA1C1_HUMAN	sp|Q9NR34|MA1C1_HUMAN Mannosyl-oligosaccharide 1,2-alpha-mannosidase IC OS=Homo sapiens OX=9606 GN=MAN1C1 PE=1 SV=1	7.01378	70866	F215838.dat	Q25524_MS19-036_T4_R3	50	1.3	1	1	1	116	2	1	1	1	1	0	0	0	1	1	0	2	1	1	2	1	1	0	2	0	0	0	0	2	1	1	0	1	2	0	2	0	2	2	1	1	1	1
RN123_HUMAN	sp|Q5XPI4|RN123_HUMAN E3 ubiquitin-protein ligase RNF123 OS=Homo sapiens OX=9606 GN=RNF123 PE=1 SV=1	6.30514	148420	F215900.dat	Q25558_MS19-036_T3_R4	49	0.5	1	1	1	0	0	0	0	0	0	0	0	0	0	0	0	0	0	0	0	0	0	0	0	0	0	0	0	0	0	0	0	0	0	0	0	0	0	0	0	0	0	0
KRA91_HUMAN	sp|A8MXZ3|KRA91_HUMAN Keratin-associated protein 9-1 OS=Homo sapiens OX=9606 GN=KRTAP9-1 PE=3 SV=1	8.05482	26311	F215896.dat	Q25554_MS19-036_T3_NR8	47	5.6	1	1	1	0	0	0	0	0	0	0	0	0	0	0	0	0	0	0	0	0	0	0	0	0	0	0	0	0	0	0	0	0	0	0	0	0	0	0	0	0	0	0
CPSM_HUMAN	sp|P31327|CPSM_HUMAN Carbamoyl-phosphate synthase [ammonia], mitochondrial OS=Homo sapiens OX=9606 GN=CPS1 PE=1 SV=2	6.29609	164835	F215666.dat	Q25465_MS19-036_T2_NR17	47	1	1	1	1	1	1	0	0	0	0	0	0	0	0	0	0	0	0	0	0	0	0	0	0	0	0	0	0	0	0	0	0	0	0	0	0	0	0	0	0	0	0	0
TEN3_HUMAN	sp|Q9P273|TEN3_HUMAN Teneurin-3 OS=Homo sapiens OX=9606 GN=TENM3 PE=2 SV=3	5.99236	300760	F215832.dat	Q25518_MS19-036_T3_R6	47	0.3	1	1	1	8	0	0	0	0	0	0	0	0	0	0	0	0	0	0	0	0	0	0	0	0	0	0	0	0	0	0	0	0	0	0	0	0	0	1	0	0	0	0
KVD07_HUMAN	sp|A0A0C4DH55|KVD07_HUMAN Immunoglobulin kappa variable 3D-7 OS=Homo sapiens OX=9606 GN=IGKV3D-7 PE=3 SV=5	5.63571	13139	F215906.dat	Q25561_MS19-036_T4_NR2	47	7.6	1	1	1	2	0	0	0	0	0	0	0	0	0	0	0	0	1	0	0	0	0	0	0	0	0	0	0	0	0	0	0	0	0	0	0	0	0	0	0	0	0	0
SARDH_HUMAN	sp|Q9UL12|SARDH_HUMAN Sarcosine dehydrogenase, mitochondrial OS=Homo sapiens OX=9606 GN=SARDH PE=1 SV=1	6.80353	100973	F215852.dat	Q25538_MS19-036_T3_R12	47	0.8	1	1	1	152	0	0	2	1	0	0	1	0	1	0	1	0	1	0	1	1	1	1	2	1	1	2	2	1	1	1	1	1	2	1	1	1	2	2	1	2	1	1
TRML1_HUMAN	sp|Q86YW5|TRML1_HUMAN Trem-like transcript 1 protein OS=Homo sapiens OX=9606 GN=TREML1 PE=1 SV=2	5.70079	32658	F215874.dat	Q25544_MS19-036_T4_NR8	47	5.1	1	1	1	33	0	0	0	0	1	0	0	0	0	0	0	0	1	0	0	0	0	1	0	0	0	1	0	0	0	0	0	1	1	0	1	0	0	1	0	0	0	0
MK01_HUMAN	sp|P28482|MK01_HUMAN Mitogen-activated protein kinase 1 OS=Homo sapiens OX=9606 GN=MAPK1 PE=1 SV=3	6.50174	41363	F215977.dat	Q25579_MS19-036_T1(Baseline)_R12	46	1.9	1	1	1	36	0	0	0	0	1	0	0	0	0	0	0	0	0	0	0	0	0	0	0	0	0	0	0	0	1	0	0	0	0	1	0	1	0	0	0	0	1	0
U17L1_HUMAN	sp|Q7RTZ2|U17L1_HUMAN Ubiquitin carboxyl-terminal hydrolase 17-like protein 1 OS=Homo sapiens OX=9606 GN=USP17L1 PE=3 SV=1	7.81186	59552	F215975.dat	Q25578_MS19-036_T3_NR14	46	1.3	1	1	1	5	0	0	0	0	0	0	0	0	0	0	0	0	0	0	0	0	1	0	0	0	0	0	0	0	0	0	0	0	0	0	0	0	0	1	0	0	0	0
HV5X1_HUMAN	sp|A0A0J9YXX1|HV5X1_HUMAN Immunoglobulin heavy variable 5-10-1 OS=Homo sapiens OX=9606 GN=IGHV5-10-1 PE=3 SV=1	8.46013	12764	F215685.dat	Q25477_MS19-036_T4_NR18	46	9.4	1	1	1	1	0	0	0	0	0	0	0	0	0	0	0	0	1	0	0	0	0	0	0	0	0	0	0	0	0	0	0	0	0	0	0	0	0	0	0	0	0	0
ABH15_HUMAN	sp|Q6UXT9|ABH15_HUMAN Protein ABHD15 OS=Homo sapiens OX=9606 GN=ABHD15 PE=1 SV=2	7.56615	51738	F215830.dat	Q25516_MS19-036_T1(Baseline)_NR7	46	1.5	1	1	1	62	0	0	0	0	0	0	0	1	0	0	0	1	1	0	0	0	1	0	0	0	0	1	1	1	1	1	1	0	2	0	1	0	1	1	1	0	1	0
PABP1_HUMAN	sp|P11940|PABP1_HUMAN Polyadenylate-binding protein 1 OS=Homo sapiens OX=9606 GN=PABPC1 PE=1 SV=2	9.51518	70626	F215851.dat	Q25537_MS19-036_T3_R9	46	1.7	1	1	1	1	0	0	0	0	0	0	0	0	0	0	0	0	0	0	0	0	0	0	0	0	0	0	0	0	0	0	0	0	0	0	0	0	0	0	0	0	0	0
KVD11_HUMAN	sp|A0A0A0MRZ8|KVD11_HUMAN Immunoglobulin kappa variable 3D-11 OS=Homo sapiens OX=9606 GN=IGKV3D-11 PE=3 SV=6	5.15286	12617	F215874.dat	Q25544_MS19-036_T4_NR8	46	7.8	1	1	1	8	0	0	0	0	0	0	0	0	0	0	0	0	0	0	0	0	0	0	0	0	0	0	0	0	0	0	0	0	0	0	0	0	0	0	0	0	0	0
CBLN4_HUMAN	sp|Q9NTU7|CBLN4_HUMAN Cerebellin-4 OS=Homo sapiens OX=9606 GN=CBLN4 PE=1 SV=1	8.84816	21794	F215895.dat	Q25553_MS19-036_T3_NR16	46	3.5	1	1	1	6	0	0	0	0	0	0	0	0	0	0	0	0	0	0	0	0	0	0	0	0	0	0	0	0	0	0	0	0	0	0	0	0	0	0	0	0	0	0
RL3_HUMAN	sp|P39023|RL3_HUMAN 60S ribosomal protein L3 OS=Homo sapiens OX=9606 GN=RPL3 PE=1 SV=2	10.1935	46080	F215895.dat	Q25553_MS19-036_T3_NR16	46	1.7	1	1	1	6	0	0	0	0	0	0	0	0	0	0	0	0	0	0	0	0	0	0	0	0	0	0	0	0	0	0	0	0	0	0	0	0	0	0	0	0	0	0
B4GT1_HUMAN	sp|P15291|B4GT1_HUMAN Beta-1,4-galactosyltransferase 1 OS=Homo sapiens OX=9606 GN=B4GALT1 PE=1 SV=5	8.88128	43892	F215922.dat	Q25565_MS19-036_T3_NR10	46	2	1	1	1	0	0	0	0	0	0	0	0	0	0	0	0	0	0	0	0	0	0	0	0	0	0	0	0	0	0	0	0	0	0	0	0	0	0	0	0	0	0	0
B4GT5_HUMAN	sp|O43286|B4GT5_HUMAN Beta-1,4-galactosyltransferase 5 OS=Homo sapiens OX=9606 GN=B4GALT5 PE=1 SV=1	8.21063	45090	F215922.dat	Q25565_MS19-036_T3_NR10	46	2.1	1	1	1	0	0	0	0	0	0	0	0	0	0	0	0	0	0	0	0	0	0	0	0	0	0	0	0	0	0	0	0	0	0	0	0	0	0	0	0	0	0	0
HV69D_HUMAN	sp|A0A0B4J2H0|HV69D_HUMAN Immunoglobulin heavy variable 1-69D OS=Homo sapiens OX=9606 GN=IGHV1-69D PE=1 SV=1	8.63725	12652	F215840.dat	Q25526_MS19-036_T1(Baseline)_NR15	45	9.4	1	1	1	6	0	0	0	0	0	0	0	0	0	0	0	0	2	0	0	1	0	0	0	0	0	0	0	0	0	0	0	0	0	0	0	0	0	0	0	0	0	0
LRIG1_HUMAN	sp|Q96JA1|LRIG1_HUMAN Leucine-rich repeats and immunoglobulin-like domains protein 1 OS=Homo sapiens OX=9606 GN=LRIG1 PE=1 SV=2	6.65545	119038	F215875.dat	Q25545_MS19-036_T3_NR13	45	0.7	1	1	1	10	0	1	0	2	0	0	0	0	0	0	0	1	0	1	0	0	0	0	1	0	0	0	0	0	0	0	0	1	0	0	0	0	0	0	0	1	0	0
ATL2_HUMAN	sp|Q86TH1|ATL2_HUMAN ADAMTS-like protein 2 OS=Homo sapiens OX=9606 GN=ADAMTSL2 PE=1 SV=1	6.01991	104553	F215947.dat	Q25572_MS19-036_T4_R10	44	0.9	1	1	1	3	0	0	0	0	0	0	0	0	0	0	0	0	0	0	0	0	0	0	0	0	0	0	0	0	0	0	0	0	0	0	0	0	0	0	0	0	0	0
COF1_HUMAN	sp|P23528|COF1_HUMAN Cofilin-1 OS=Homo sapiens OX=9606 GN=CFL1 PE=1 SV=3	8.21579	18491	F215666.dat	Q25465_MS19-036_T2_NR17	44	12	1	1	1	1	1	0	0	0	0	0	0	0	0	0	0	0	0	0	0	0	0	0	0	0	0	0	0	0	0	0	0	0	0	0	0	0	0	0	0	0	0	0
B2MG_HUMAN	sp|P61769|B2MG_HUMAN Beta-2-microglobulin OS=Homo sapiens OX=9606 GN=B2M PE=1 SV=1	6.05871	13706	F215881.dat	Q25549_MS19-036_T4_NR4	44	18.5	1	1	1	32	0	0	0	0	0	0	0	0	0	0	0	0	0	0	0	0	0	0	0	0	0	1	0	0	1	0	0	0	0	0	0	0	0	0	0	0	0	0
FARP1_HUMAN	sp|Q9Y4F1|FARP1_HUMAN FERM, ARHGEF and pleckstrin domain-containing protein 1 OS=Homo sapiens OX=9606 GN=FARP1 PE=1 SV=1	8.3285	118559	F215846.dat	Q25532_MS19-036_T2_NR18	44	0.7	1	1	1	5	0	0	0	0	0	0	0	0	0	0	0	0	3	0	0	0	0	0	0	0	0	0	0	0	0	0	0	0	0	0	0	0	0	0	0	0	0	0
SHRM3_HUMAN	sp|Q8TF72|SHRM3_HUMAN Protein Shroom3 OS=Homo sapiens OX=9606 GN=SHROOM3 PE=1 SV=2	7.86942	216724	F215894.dat	Q25552_MS19-036_T3_NR5	44	0.5	1	1	1	32	1	2	1	1	1	1	1	0	1	1	0	1	1	0	0	1	1	0	0	0	0	0	0	0	0	0	0	0	0	1	1	1	1	0	0	0	1	0
H3C_HUMAN	sp|Q6NXT2|H3C_HUMAN Histone H3.3C OS=Homo sapiens OX=9606 GN=H3F3C PE=1 SV=3	11.1053	15204	F215667.dat	Q25466_MS19-036_T3_R11	43	5.2	1	1	1	0	0	0	0	0	0	0	0	0	0	0	0	0	0	0	0	0	0	0	0	0	0	0	0	0	0	0	0	0	0	0	0	0	0	0	0	0	0	0
CE192_HUMAN	sp|Q8TEP8|CE192_HUMAN Centrosomal protein of 192 kDa OS=Homo sapiens OX=9606 GN=CEP192 PE=1 SV=3	5.30846	278938	F215777.dat	Q25493_MS19-036_T1(Baseline)_NR11	43	0.3	1	1	1	32	0	0	0	0	0	0	0	1	1	0	0	0	0	0	0	0	0	0	0	0	0	0	2	1	0	0	0	1	0	0	0	0	0	0	0	0	1	1
H3X_HUMAN	sp|P0DPK5|H3X_HUMAN Putative histone H3.X OS=Homo sapiens OX=9606 PE=5 SV=1	11.3906	16456	F215667.dat	Q25466_MS19-036_T3_R11	43	4.8	1	1	1	17	1	1	1	0	0	0	0	0	0	1	0	0	0	2	0	0	0	1	0	0	0	0	0	0	0	0	0	0	0	0	0	0	0	0	0	0	0	0
GPVI_HUMAN	sp|Q9HCN6|GPVI_HUMAN Platelet glycoprotein VI OS=Homo sapiens OX=9606 GN=GP6 PE=1 SV=4	9.35227	36843	F215924.dat	Q25567_MS19-036_T4_R14	43	5	1	1	1	4	0	0	0	0	0	0	0	0	0	0	0	0	0	0	0	0	0	0	0	0	0	0	0	0	0	0	0	0	0	0	0	0	0	0	0	0	0	0
HYDIN_HUMAN	sp|Q4G0P3|HYDIN_HUMAN Hydrocephalus-inducing protein homolog OS=Homo sapiens OX=9606 GN=HYDIN PE=1 SV=3	5.72905	575528	F215687.dat	Q25479_MS19-036_T1(Baseline)_NR9	43	0.1	1	1	1	31	0	0	1	1	1	0	1	1	1	0	1	2	0	0	2	2	1	1	0	0	0	0	0	0	1	1	0	0	1	0	0	0	1	0	0	0	1	1
CATS_HUMAN	sp|P25774|CATS_HUMAN Cathepsin S OS=Homo sapiens OX=9606 GN=CTSS PE=1 SV=3	8.61261	37471	F215947.dat	Q25572_MS19-036_T4_R10	43	3.3	1	1	1	1	0	0	0	0	0	0	0	0	0	0	0	0	0	0	0	0	0	0	0	0	0	0	0	0	0	0	0	0	0	0	0	0	0	0	0	0	0	0
KBTB3_HUMAN	sp|Q8NAB2|KBTB3_HUMAN Kelch repeat and BTB domain-containing protein 3 OS=Homo sapiens OX=9606 GN=KBTBD3 PE=2 SV=3	5.17827	69794	F215666.dat	Q25465_MS19-036_T2_NR17	43	1.1	1	1	1	7	4	0	0	0	0	0	0	0	0	0	0	0	0	0	0	0	0	0	0	0	0	1	0	0	0	0	0	0	0	0	0	0	0	0	0	0	0	0
BLVRB_HUMAN	sp|P30043|BLVRB_HUMAN Flavin reductase (NADPH) OS=Homo sapiens OX=9606 GN=BLVRB PE=1 SV=3	7.12848	22105	F215881.dat	Q25549_MS19-036_T4_NR4	43	4.9	1	1	1	12	0	0	0	0	0	0	0	1	0	0	0	0	0	0	1	1	0	1	0	0	0	0	0	0	0	0	0	0	0	0	0	0	1	0	1	0	0	0
LY66F_HUMAN	sp|Q5SQ64|LY66F_HUMAN Lymphocyte antigen 6 complex locus protein G6f OS=Homo sapiens OX=9606 GN=LY6G6F PE=1 SV=2	8.90868	32444	F215924.dat	Q25567_MS19-036_T4_R14	43	2.7	1	1	1	2	0	0	0	0	0	0	0	0	0	0	0	0	0	0	0	0	0	0	0	0	0	0	0	0	0	0	0	0	0	0	0	0	0	0	0	0	0	0
HLTF_HUMAN	sp|Q14527|HLTF_HUMAN Helicase-like transcription factor OS=Homo sapiens OX=9606 GN=HLTF PE=1 SV=2	8.82418	113857	F215812.dat	Q25500_MS19-036_T1(Baseline)_R2	42	1.4	1	1	1	3	0	0	0	0	0	0	0	0	0	0	0	0	0	0	0	0	0	0	0	0	0	0	0	0	0	0	0	0	0	0	0	0	0	0	1	0	0	0
HYI_HUMAN	sp|Q5T013|HYI_HUMAN Putative hydroxypyruvate isomerase OS=Homo sapiens OX=9606 GN=HYI PE=1 SV=2	5.36142	30387	F215674.dat	Q25473_MS19-036_T1(Baseline)_NR1	42	2.5	1	1	1	0	0	0	0	0	0	0	0	0	0	0	0	0	0	0	0	0	0	0	0	0	0	0	0	0	0	0	0	0	0	0	0	0	0	0	0	0	0	0
PASD1_HUMAN	sp|Q8IV76|PASD1_HUMAN Circadian clock protein PASD1 OS=Homo sapiens OX=9606 GN=PASD1 PE=1 SV=1	4.9578	87373	F215947.dat	Q25572_MS19-036_T4_R10	42	1.3	1	1	1	30	0	0	0	0	0	0	0	0	0	0	0	0	0	0	0	0	0	1	0	1	0	0	0	0	0	0	0	0	0	0	1	0	0	0	0	0	0	1
FRPD1_HUMAN	sp|Q5SYB0|FRPD1_HUMAN FERM and PDZ domain-containing protein 1 OS=Homo sapiens OX=9606 GN=FRMPD1 PE=1 SV=1	5.13528	173328	F215982.dat	Q25582_MS19-036_T2_NR8	42	0.4	1	1	1	2	0	0	0	0	0	0	0	0	0	0	0	0	0	0	0	0	0	0	0	0	0	0	0	0	0	0	0	0	0	0	0	0	0	0	0	0	0	0
PDIA3_HUMAN	sp|P30101|PDIA3_HUMAN Protein disulfide-isomerase A3 OS=Homo sapiens OX=9606 GN=PDIA3 PE=1 SV=4	5.98341	56747	F215666.dat	Q25465_MS19-036_T2_NR17	42	2.2	1	1	1	1	1	0	0	0	0	0	0	0	0	0	0	0	0	0	0	0	0	0	0	0	0	0	0	0	0	0	0	0	0	0	0	0	0	0	0	0	0	0
BHMG1_HUMAN	sp|C9JSJ3|BHMG1_HUMAN Basic helix-loop-helix and HMG box domain-containing protein 1 OS=Homo sapiens OX=9606 GN=BHMG1 PE=3 SV=2	9.10063	70154	F215833.dat	Q25519_MS19-036_T2_R7	42	1.4	1	1	1	40	0	0	0	0	1	0	0	1	1	0	0	0	0	0	0	1	0	1	0	1	0	1	0	0	0	1	1	0	1	0	0	0	0	1	0	1	1	0
AKAP6_HUMAN	sp|Q13023|AKAP6_HUMAN A-kinase anchor protein 6 OS=Homo sapiens OX=9606 GN=AKAP6 PE=1 SV=3	4.89692	256560	F215925.dat	Q25568_MS19-036_T4_NR6	42	0.3	1	1	1	0	0	0	0	0	0	0	0	0	0	0	0	0	0	0	0	0	0	0	0	0	0	0	0	0	0	0	0	0	0	0	0	0	0	0	0	0	0	0
HNRH1_HUMAN	sp|P31943|HNRH1_HUMAN Heterogeneous nuclear ribonucleoprotein H OS=Homo sapiens OX=9606 GN=HNRNPH1 PE=1 SV=4	5.88736	49198	F215851.dat	Q25537_MS19-036_T3_R9	41	2.2	1	1	1	0	0	0	0	0	0	0	0	0	0	0	0	0	0	0	0	0	0	0	0	0	0	0	0	0	0	0	0	0	0	0	0	0	0	0	0	0	0	0
ACINU_HUMAN	sp|Q9UKV3|ACINU_HUMAN Apoptotic chromatin condensation inducer in the nucleus OS=Homo sapiens OX=9606 GN=ACIN1 PE=1 SV=2	6.07547	151771	F215877.dat	Q25547_MS19-036_T3_NR12	41	1	1	1	1	5	0	0	0	0	0	0	0	0	0	0	0	0	1	0	0	0	0	0	0	0	0	0	0	0	0	0	0	0	0	0	0	0	0	0	0	0	0	0
XRN1_HUMAN	sp|Q8IZH2|XRN1_HUMAN 5'-3' exoribonuclease 1 OS=Homo sapiens OX=9606 GN=XRN1 PE=1 SV=1	6.78017	193985	F215873.dat	Q25543_MS19-036_T3_NR11	40	0.4	1	1	1	0	0	0	0	0	0	0	0	0	0	0	0	0	0	0	0	0	0	0	0	0	0	0	0	0	0	0	0	0	0	0	0	0	0	0	0	0	0	0
CCD33_HUMAN	sp|Q8N5R6|CCD33_HUMAN Coiled-coil domain-containing protein 33 OS=Homo sapiens OX=9606 GN=CCDC33 PE=1 SV=3	6.32308	107149	F215791.dat	Q25495_MS19-036_T4_NR16	40	0.7	1	1	1	40	0	0	0	0	0	0	0	0	1	0	0	1	1	0	0	0	1	0	0	1	0	0	1	0	1	1	1	0	1	1	0	1	1	0	0	2	1	0
ADH4_HUMAN	sp|P08319|ADH4_HUMAN All-trans-retinol dehydrogenase [NAD(+)] ADH4 OS=Homo sapiens OX=9606 GN=ADH4 PE=1 SV=5	8.25127	40196	F215956.dat	Q25573_MS19-036_T3_NR17	40	3.9	1	1	1	2	0	0	0	0	0	0	0	0	0	0	0	0	0	0	0	0	0	0	0	0	0	0	0	0	0	0	0	0	0	0	0	0	0	0	0	0	0	0
KLH42_HUMAN	sp|Q9P2K6|KLH42_HUMAN Kelch-like protein 42 OS=Homo sapiens OX=9606 GN=KLHL42 PE=1 SV=2	5.52019	56831	F215793.dat	Q25496_MS19-036_T3_R18	40	1.4	1	1	1	7	0	0	0	0	0	0	0	0	0	0	0	0	0	0	0	0	0	0	0	0	0	0	0	0	0	0	0	0	0	0	1	0	0	0	0	0	0	0
SPB12_HUMAN	sp|Q96P63|SPB12_HUMAN Serpin B12 OS=Homo sapiens OX=9606 GN=SERPINB12 PE=1 SV=1	5.36009	46247	F215688.dat	Q25480_MS19-036_T1(Baseline)_R3	40	2.2	1	1	1	7	0	0	0	0	0	2	0	0	0	1	0	0	0	0	0	1	0	0	1	0	0	0	0	0	0	0	0	0	0	0	0	0	0	0	0	0	0	0
OLA1_HUMAN	sp|Q9NTK5|OLA1_HUMAN Obg-like ATPase 1 OS=Homo sapiens OX=9606 GN=OLA1 PE=1 SV=2	7.63904	44715	F215835.dat	Q25521_MS19-036_T3_NR3	40	1.8	1	1	1	213	2	1	2	1	2	1	2	2	1	0	2	2	2	2	2	2	2	2	1	2	2	2	2	1	1	1	2	1	2	2	2	2	2	1	3	2	2	2
DHX9_HUMAN	sp|Q08211|DHX9_HUMAN ATP-dependent RNA helicase A OS=Homo sapiens OX=9606 GN=DHX9 PE=1 SV=4	6.40881	140869	F215837.dat	Q25523_MS19-036_T4_NR14	40	0.6	1	1	1	103	0	0	0	0	2	0	0	1	1	0	0	0	1	0	1	0	1	2	0	0	0	1	1	1	1	3	2	2	2	0	0	1	1	1	1	1	0	1
SBP2L_HUMAN	sp|Q93073|SBP2L_HUMAN Selenocysteine insertion sequence-binding protein 2-like OS=Homo sapiens OX=9606 GN=SECISBP2L PE=1 SV=3	5.75523	121700	F215733.dat	Q25485_MS19-036_T1(Baseline)_NR14	40	0.7	1	1	1	11	0	0	1	1	1	0	1	0	1	0	1	1	1	0	0	0	0	0	1	0	1	0	0	0	0	0	0	0	0	0	0	0	0	0	0	0	0	0
2ABA_HUMAN	sp|P63151|2ABA_HUMAN Serine/threonine-protein phosphatase 2A 55 kDa regulatory subunit B alpha isoform OS=Homo sapiens OX=9606 GN=PPP2R2A PE=1 SV=1	5.81943	51659	F215825.dat	Q25511_MS19-036_T1(Baseline)_NR6	39	3.1	1	1	1	2	0	0	0	0	0	0	0	0	0	0	0	0	0	0	0	0	0	0	0	0	0	0	0	0	0	0	0	0	0	0	0	0	1	0	0	0	0	0
GLPK_HUMAN	sp|P32189|GLPK_HUMAN Glycerol kinase OS=Homo sapiens OX=9606 GN=GK PE=1 SV=3	6.11954	61205	F215844.dat	Q25530_MS19-036_T1(Baseline)_R15	39	1.3	1	1	1	4	0	0	0	0	0	0	0	0	0	0	0	0	0	0	0	0	0	0	1	0	0	0	0	0	0	0	0	0	0	0	0	0	0	0	0	0	0	1
GEMI2_HUMAN	sp|O14893|GEMI2_HUMAN Gem-associated protein 2 OS=Homo sapiens OX=9606 GN=GEMIN2 PE=1 SV=1	5.43145	31565	F215923.dat	Q25566_MS19-036_T2_NR16	39	2.5	1	1	1	375	3	2	3	2	3	1	3	3	4	0	2	2	3	3	3	4	3	4	2	2	3	3	4	3	4	5	3	3	3	4	4	5	5	4	2	3	3	3
MB12B_HUMAN	sp|Q9H7P6|MB12B_HUMAN Multivesicular body subunit 12B OS=Homo sapiens OX=9606 GN=MVB12B PE=1 SV=2	8.42	35597	F215839.dat	Q25525_MS19-036_T2_R13	39	3.4	1	1	1	6	0	0	0	0	0	0	0	0	0	0	0	0	0	0	0	0	0	0	0	0	0	0	0	0	0	0	0	0	0	0	0	0	1	0	0	0	0	0
CHD1L_HUMAN	sp|Q86WJ1|CHD1L_HUMAN Chromodomain-helicase-DNA-binding protein 1-like OS=Homo sapiens OX=9606 GN=CHD1L PE=1 SV=3	6.45221	100937	F215666.dat	Q25465_MS19-036_T2_NR17	39	1.2	1	1	1	14	1	1	0	0	0	0	1	0	1	0	0	1	0	1	0	0	0	0	1	1	1	0	1	0	0	0	0	0	0	0	0	1	0	0	0	0	0	0
SPTA1_HUMAN	sp|P02549|SPTA1_HUMAN Spectrin alpha chain, erythrocytic 1 OS=Homo sapiens OX=9606 GN=SPTA1 PE=1 SV=5	4.95422	279842	F215975.dat	Q25578_MS19-036_T3_NR14	39	0.3	1	1	1	44	0	0	0	0	0	0	0	0	0	0	0	0	0	0	0	0	0	0	1	0	0	0	0	0	0	0	0	0	0	0	0	0	0	0	0	0	0	0
SUN3_HUMAN	sp|Q8TAQ9|SUN3_HUMAN SUN domain-containing protein 3 OS=Homo sapiens OX=9606 GN=SUN3 PE=1 SV=4	7.67855	40478	F215673.dat	Q25472_MS19-036_T1(Baseline)_R5	39	2	1	1	1	2	0	0	0	0	0	0	0	1	0	0	0	0	0	0	0	0	0	0	0	0	0	0	0	0	0	0	0	0	0	0	0	0	0	0	0	0	0	0
HNRC1_HUMAN	sp|O60812|HNRC1_HUMAN Heterogeneous nuclear ribonucleoprotein C-like 1 OS=Homo sapiens OX=9606 GN=HNRNPCL1 PE=1 SV=1	4.93061	32123	F215972.dat	Q25576_MS19-036_T4_R13	39	3.4	1	1	1	1	0	0	0	0	0	0	0	0	0	0	0	0	0	0	0	0	0	0	0	0	0	0	0	0	0	0	0	0	0	0	0	0	0	0	0	0	0	0
GSTP1_HUMAN	sp|P09211|GSTP1_HUMAN Glutathione S-transferase P OS=Homo sapiens OX=9606 GN=GSTP1 PE=1 SV=2	5.43334	23341	F215851.dat	Q25537_MS19-036_T3_R9	38	5.2	1	1	1	1	0	0	0	0	0	0	0	0	0	0	0	0	0	0	0	0	0	0	0	0	0	0	0	0	0	0	0	0	0	0	0	0	0	0	0	0	0	0
HPRT_HUMAN	sp|P00492|HPRT_HUMAN Hypoxanthine-guanine phosphoribosyltransferase OS=Homo sapiens OX=9606 GN=HPRT1 PE=1 SV=2	6.21078	24564	F215666.dat	Q25465_MS19-036_T2_NR17	38	4.6	1	1	1	1	1	0	0	0	0	0	0	0	0	0	0	0	0	0	0	0	0	0	0	0	0	0	0	0	0	0	0	0	0	0	0	0	0	0	0	0	0	0
CYTC_HUMAN	sp|P01034|CYTC_HUMAN Cystatin-C OS=Homo sapiens OX=9606 GN=CST3 PE=1 SV=1	9.0009	15789	F215924.dat	Q25567_MS19-036_T4_R14	38	11.6	1	1	1	31	0	0	0	0	0	0	0	0	1	0	0	0	0	0	0	0	1	0	0	0	0	0	0	0	0	0	2	0	0	1	1	0	0	0	0	0	0	0
PYGB_HUMAN	sp|P11216|PYGB_HUMAN Glycogen phosphorylase, brain form OS=Homo sapiens OX=9606 GN=PYGB PE=1 SV=5	6.40134	96635	F215830.dat	Q25516_MS19-036_T1(Baseline)_NR7	38	0.9	1	1	1	0	0	0	0	0	0	0	0	0	0	0	0	0	0	0	0	0	0	0	0	0	0	0	0	0	0	0	0	0	0	0	0	0	0	0	0	0	0	0
LYSM3_HUMAN	LysM and putative peptidoglycan-binding domain-containing protein 3 OS=Homo sapiens OX=9606 GN=LYSMD3 PE=1 SV=2	5.61992	34516	F215910.dat	Q25562_MS19-036_T4_R12	38	2.3	1	1	1	11	0	0	0	0	0	0	0	0	0	0	0	0	0	0	0	0	0	0	0	0	0	0	0	0	0	0	0	0	0	0	0	0	0	0	2	0	0	0
ANXA6_HUMAN	sp|P08133|ANXA6_HUMAN Annexin A6 OS=Homo sapiens OX=9606 GN=ANXA6 PE=1 SV=3	5.41709	75826	F215838.dat	Q25524_MS19-036_T4_R3	37	1	1	1	1	5	0	1	0	0	0	0	0	0	0	0	0	0	0	0	0	0	0	0	0	0	0	0	1	0	0	0	0	0	0	0	0	0	0	0	0	1	0	0
VGFR3_HUMAN	sp|P35916|VGFR3_HUMAN Vascular endothelial growth factor receptor 3 OS=Homo sapiens OX=9606 GN=FLT4 PE=1 SV=3	5.90341	152660	F215813.dat	Q25501_MS19-036_T2_NR6	37	0.7	1	1	1	1	0	0	0	0	0	0	0	0	0	0	0	0	0	0	0	0	0	0	0	0	0	0	0	0	0	0	0	0	0	0	0	0	0	0	0	1	0	0
CDK10_HUMAN	sp|Q15131|CDK10_HUMAN Cyclin-dependent kinase 10 OS=Homo sapiens OX=9606 GN=CDK10 PE=1 SV=1	9.05544	41012	F215925.dat	Q25568_MS19-036_T4_NR6	37	2.5	1	1	1	66	0	0	0	0	0	0	0	0	0	0	0	0	0	0	0	0	0	0	0	0	0	2	0	1	0	0	0	0	0	0	0	0	0	0	1	0	0	0
DSCAM_HUMAN	sp|O60469|DSCAM_HUMAN Down syndrome cell adhesion molecule OS=Homo sapiens OX=9606 GN=DSCAM PE=1 SV=2	7.77532	222121	F215847.dat	Q25533_MS19-036_T2_R18	37	0.3	1	1	1	1	0	0	0	0	0	0	0	0	0	0	0	0	0	0	0	0	0	0	0	0	0	0	0	0	0	0	0	0	0	0	0	0	0	0	0	0	0	0
IBP6_HUMAN	sp|P24592|IBP6_HUMAN Insulin-like growth factor-binding protein 6 OS=Homo sapiens OX=9606 GN=IGFBP6 PE=1 SV=1	8.14729	25306	F215975.dat	Q25578_MS19-036_T3_NR14	37	5.4	1	1	1	2	0	0	0	0	0	0	0	0	0	0	0	0	0	0	0	0	0	0	0	0	0	0	0	0	0	0	0	0	0	0	0	0	0	0	0	0	0	0
RASF6_HUMAN	sp|Q6ZTQ3|RASF6_HUMAN Ras association domain-containing protein 6 OS=Homo sapiens OX=9606 GN=RASSF6 PE=1 SV=1	8.79357	43356	F215675.dat	Q25474_MS19-036_T1(Baseline)_R9	37	2.7	1	1	1	379	3	1	5	0	4	2	4	4	3	1	3	4	3	2	2	4	4	4	3	3	4	3	4	2	2	3	2	4	4	2	4	3	3	3	3	6	4	5
CA2D1_HUMAN	sp|P54289|CA2D1_HUMAN Voltage-dependent calcium channel subunit alpha-2/delta-1 OS=Homo sapiens OX=9606 GN=CACNA2D1 PE=1 SV=3	5.11964	124490	F215874.dat	Q25544_MS19-036_T4_NR8	37	1.4	1	1	1	3	0	0	0	0	0	0	0	0	0	0	0	0	0	0	0	0	0	0	0	0	0	0	0	0	0	0	0	0	0	0	0	0	0	0	0	0	0	0
PP1A_HUMAN	sp|P62136|PP1A_HUMAN Serine/threonine-protein phosphatase PP1-alpha catalytic subunit OS=Homo sapiens OX=9606 GN=PPP1CA PE=1 SV=1	5.93971	37488	F215975.dat	Q25578_MS19-036_T3_NR14	36	3	1	1	1	1	0	0	0	0	0	0	0	0	0	0	0	0	0	0	0	0	0	0	0	0	0	0	0	0	0	0	0	0	0	0	0	0	0	0	0	0	0	0
PRDX1_HUMAN	sp|Q06830|PRDX1_HUMAN Peroxiredoxin-1 OS=Homo sapiens OX=9606 GN=PRDX1 PE=1 SV=1	8.27238	22096	F215921.dat	Q25564_MS19-036_T4_R6	36	5	1	1	1	2	1	0	0	0	0	0	0	0	0	0	0	0	0	0	0	0	0	0	0	0	0	0	0	0	0	0	0	0	0	0	0	0	0	0	0	0	0	0
EFNB3_HUMAN	sp|Q15768|EFNB3_HUMAN Ephrin-B3 OS=Homo sapiens OX=9606 GN=EFNB3 PE=1 SV=1	8.85015	35812	F215673.dat	Q25472_MS19-036_T1(Baseline)_R5	36	3.5	1	1	1	4	0	0	0	0	0	0	0	1	0	0	0	0	0	0	0	0	0	0	0	0	0	0	0	0	0	0	0	0	0	0	0	0	0	0	0	0	0	0
KIF15_HUMAN	sp|Q9NS87|KIF15_HUMAN Kinesin-like protein KIF15 OS=Homo sapiens OX=9606 GN=KIF15 PE=1 SV=1	5.74756	160061	F215956.dat	Q25573_MS19-036_T3_NR17	36	0.9	1	1	1	7	0	0	0	0	0	0	0	0	0	0	0	0	0	0	0	1	0	0	0	0	0	0	0	0	0	0	0	0	0	0	0	0	0	0	0	0	0	0
HSPB1_HUMAN	sp|P04792|HSPB1_HUMAN Heat shock protein beta-1 OS=Homo sapiens OX=9606 GN=HSPB1 PE=1 SV=2	5.97753	22768	F215818.dat	Q25504_MS19-036_T1(Baseline)_NR10	36	7.8	1	1	1	2	0	0	0	0	0	0	0	0	0	0	0	0	0	0	0	0	0	0	0	0	0	0	0	0	0	0	0	0	0	0	0	0	0	0	0	0	0	0
XP32_HUMAN	sp|Q5T750|XP32_HUMAN Skin-specific protein 32 OS=Homo sapiens OX=9606 GN=XP32 PE=1 SV=1	8.41326	26219	F215685.dat	Q25477_MS19-036_T4_NR18	36	4	1	1	1	2	0	0	0	0	0	0	0	0	0	0	0	0	1	0	0	0	0	0	0	0	0	0	0	0	0	0	0	0	0	0	0	0	0	0	1	0	0	0
HXC5_HUMAN	sp|Q00444|HXC5_HUMAN Homeobox protein Hox-C5 OS=Homo sapiens OX=9606 GN=HOXC5 PE=3 SV=1	9.57136	24960	F215791.dat	Q25495_MS19-036_T4_NR16	36	6.8	1	1	1	6	0	0	0	0	1	0	0	0	0	0	0	0	0	0	0	0	0	0	0	1	0	0	0	0	0	0	0	0	0	1	0	0	0	0	0	0	0	0
DYH10_HUMAN	sp|Q8IVF4|DYH10_HUMAN Dynein heavy chain 10, axonemal OS=Homo sapiens OX=9606 GN=DNAH10 PE=1 SV=4	5.63699	514512	F215817.dat	Q25503_MS19-036_T2_NR10	35	0.2	1	1	1	15	0	0	0	0	0	0	0	0	0	0	0	0	0	0	0	0	0	0	0	0	0	0	0	1	0	0	0	0	0	0	0	0	0	0	0	0	0	1
MEIOC_HUMAN	sp|A2RUB1|MEIOC_HUMAN Meiosis-specific coiled-coil domain-containing protein MEIOC OS=Homo sapiens OX=9606 GN=MEIOC PE=2 SV=3	6.6785	107491	F215691.dat	Q25482_MS19-036_T1(Baseline)_NR2	35	0.7	1	1	1	1	0	0	0	0	0	0	0	0	0	0	0	0	0	0	0	0	0	1	0	0	0	0	0	0	0	0	0	0	0	0	0	0	0	0	0	0	0	0
ARFP1_HUMAN	sp|P53367|ARFP1_HUMAN Arfaptin-1 OS=Homo sapiens OX=9606 GN=ARFIP1 PE=1 SV=2	6.23895	41713	F215791.dat	Q25495_MS19-036_T4_NR16	35	1.9	1	1	1	151	1	0	3	0	1	1	2	1	1	0	0	1	0	0	3	1	2	0	1	1	0	1	1	1	1	0	0	2	2	2	0	1	2	1	2	1	1	2
CBLL2_HUMAN	sp|Q8N7E2|CBLL2_HUMAN E3 ubiquitin-protein ligase CBLL2 OS=Homo sapiens OX=9606 GN=CBLL2 PE=1 SV=1	9.56676	48754	F215810.dat	Q25499_MS19-036_T2_R15	35	1.6	1	1	1	2	0	0	0	0	1	0	0	0	0	0	0	0	0	0	0	0	0	0	0	0	0	0	0	0	0	0	0	0	0	0	0	0	0	1	0	0	0	0
SHIP1_HUMAN	sp|Q92835|SHIP1_HUMAN Phosphatidylinositol 3,4,5-trisphosphate 5-phosphatase 1 OS=Homo sapiens OX=9606 GN=INPP5D PE=1 SV=2	7.3765	133209	F215847.dat	Q25533_MS19-036_T2_R18	35	0.6	1	1	1	0	0	0	0	0	0	0	0	0	0	0	0	0	0	0	0	0	0	0	0	0	0	0	0	0	0	0	0	0	0	0	0	0	0	0	0	0	0	0
HNRPF_HUMAN	sp|P52597|HNRPF_HUMAN Heterogeneous nuclear ribonucleoprotein F OS=Homo sapiens OX=9606 GN=HNRNPF PE=1 SV=3	5.37624	45643	F215921.dat	Q25564_MS19-036_T4_R6	35	2.4	1	1	1	0	0	0	0	0	0	0	0	0	0	0	0	0	0	0	0	0	0	0	0	0	0	0	0	0	0	0	0	0	0	0	0	0	0	0	0	0	0	0
TM177_HUMAN	sp|Q53S58|TM177_HUMAN Transmembrane protein 177 OS=Homo sapiens OX=9606 GN=TMEM177 PE=1 SV=1	9.65898	33739	F215977.dat	Q25579_MS19-036_T1(Baseline)_R12	35	2.3	1	1	1	30	0	0	0	0	0	0	0	0	0	0	0	0	0	0	0	0	0	0	0	0	0	2	0	0	0	1	0	0	0	0	0	1	0	0	0	0	0	0
ELYS_HUMAN	sp|Q8WYP5|ELYS_HUMAN Protein ELYS OS=Homo sapiens OX=9606 GN=AHCTF1 PE=1 SV=3	6.19335	252342	F215687.dat	Q25479_MS19-036_T1(Baseline)_NR9	35	0.4	1	1	1	168	1	1	2	1	1	0	1	1	1	0	1	0	2	0	3	1	1	2	2	2	0	2	2	1	2	2	1	2	1	1	1	0	2	0	2	1	1	2
NRK_HUMAN	sp|Q7Z2Y5|NRK_HUMAN Nik-related protein kinase OS=Homo sapiens OX=9606 GN=NRK PE=1 SV=2	5.9303	178369	F215849.dat	Q25535_MS19-036_T2_R10	35	0.4	1	1	1	2	0	0	0	0	0	0	0	0	0	0	0	0	0	0	0	0	0	0	0	0	0	0	0	0	0	0	0	0	0	0	0	0	0	0	0	0	0	0
WDR91_HUMAN	sp|A4D1P6|WDR91_HUMAN WD repeat-containing protein 91 OS=Homo sapiens OX=9606 GN=WDR91 PE=1 SV=2	6.15169	83292	F215818.dat	Q25504_MS19-036_T1(Baseline)_NR10	35	0.9	1	1	1	2	0	0	0	0	0	1	0	0	0	0	0	0	0	0	0	0	0	0	0	0	0	0	0	0	0	0	0	0	0	0	0	0	0	0	0	0	0	0
MPPA_HUMAN	sp|Q10713|MPPA_HUMAN Mitochondrial-processing peptidase subunit alpha OS=Homo sapiens OX=9606 GN=PMPCA PE=1 SV=2	6.45016	58216	F215838.dat	Q25524_MS19-036_T4_R3	35	1.7	1	1	1	4	0	0	0	0	0	0	0	0	0	0	0	0	0	0	0	0	0	0	0	0	0	0	0	0	0	0	0	0	0	0	0	0	0	0	0	0	0	0
XPO2_HUMAN	sp|P55060|XPO2_HUMAN Exportin-2 OS=Homo sapiens OX=9606 GN=CSE1L PE=1 SV=3	5.51416	110346	F215691.dat	Q25482_MS19-036_T1(Baseline)_NR2	35	0.8	1	1	1	5	1	2	0	0	0	0	0	0	0	0	0	0	0	0	0	0	0	1	0	0	0	0	0	0	0	0	0	0	0	0	0	0	0	0	0	0	0	0
CFA53_HUMAN	sp|Q96M91|CFA53_HUMAN Cilia- and flagella-associated protein 53 OS=Homo sapiens OX=9606 GN=CFAP53 PE=1 SV=2	9.0011	61796	F215936.dat	Q25571_MS19-036_T1(Baseline)_NR5	35	1.4	1	1	1	63	0	0	0	0	0	0	0	0	1	0	0	0	0	0	0	0	0	0	0	0	0	0	2	2	0	0	0	0	1	1	0	0	1	0	1	0	0	0
KGP2_HUMAN	sp|Q13237|KGP2_HUMAN cGMP-dependent protein kinase 2 OS=Homo sapiens OX=9606 GN=PRKG2 PE=1 SV=1	8.67078	87377	F215849.dat	Q25535_MS19-036_T2_R10	35	1	1	1	1	129	0	0	0	0	1	0	0	1	2	0	0	0	1	0	1	0	1	1	0	0	0	1	0	1	1	1	2	0	1	1	1	1	1	2	1	1	1	0
IF5A1_HUMAN	sp|P63241|IF5A1_HUMAN Eukaryotic translation initiation factor 5A-1 OS=Homo sapiens OX=9606 GN=EIF5A PE=1 SV=2	5.0744	16821	F215666.dat	Q25465_MS19-036_T2_NR17	35	7.8	1	1	1	1	1	0	0	0	0	0	0	0	0	0	0	0	0	0	0	0	0	0	0	0	0	0	0	0	0	0	0	0	0	0	0	0	0	0	0	0	0	0
CU129_HUMAN	sp|Q96M42|CU129_HUMAN Putative uncharacterized protein encoded by LINC00479 OS=Homo sapiens OX=9606 GN=LINC00479 PE=5 SV=2	8.2778	15199	F215691.dat	Q25482_MS19-036_T1(Baseline)_NR2	35	4.9	1	1	1	5	2	0	0	0	0	0	0	0	0	0	0	0	0	0	0	0	0	1	0	0	0	0	0	0	0	0	0	0	0	0	0	0	0	0	0	0	0	0
ESIP1_HUMAN	sp|Q96J88|ESIP1_HUMAN Epithelial-stromal interaction protein 1 OS=Homo sapiens OX=9606 GN=EPSTI1 PE=2 SV=2	9.89544	36771	F215896.dat	Q25554_MS19-036_T3_NR8	35	3.1	1	1	1	26	0	0	0	0	0	0	0	0	0	0	0	0	1	0	1	0	0	1	0	0	0	0	0	0	1	0	1	0	0	0	0	0	0	1	0	0	0	1
PCM1_HUMAN	sp|Q15154|PCM1_HUMAN Pericentriolar material 1 protein OS=Homo sapiens OX=9606 GN=PCM1 PE=1 SV=5	4.95034	228403	F215669.dat	Q25468_MS19-036_T3_R7	35	0.7	1	1	1	8	0	0	0	1	0	0	0	0	0	0	0	0	1	0	0	0	0	0	0	0	0	0	1	0	0	0	0	0	0	0	0	0	0	0	0	0	0	0
SPTN2_HUMAN	sp|O15020|SPTN2_HUMAN Spectrin beta chain, non-erythrocytic 2 OS=Homo sapiens OX=9606 GN=SPTBN2 PE=1 SV=3	5.78779	271157	F215902.dat	Q25559_MS19-036_T4_NR7	35	0.3	1	1	1	18	0	0	0	0	0	0	0	0	0	0	0	0	0	0	0	0	0	0	0	0	0	0	0	0	0	0	0	0	0	0	0	0	0	0	0	0	0	0
RS16_HUMAN	sp|P62249|RS16_HUMAN 40S ribosomal protein S16 OS=Homo sapiens OX=9606 GN=RPS16 PE=1 SV=2	10.2134	16435	F215666.dat	Q25465_MS19-036_T2_NR17	34	6.8	1	1	1	2	1	1	0	0	0	0	0	0	0	0	0	0	0	0	0	0	0	0	0	0	0	0	0	0	0	0	0	0	0	0	0	0	0	0	0	0	0	0
CTIP_HUMAN	sp|Q99708|CTIP_HUMAN DNA endonuclease RBBP8 OS=Homo sapiens OX=9606 GN=RBBP8 PE=1 SV=2	5.92238	101878	F215885.dat	Q25550_MS19-036_T3_NR4	34	0.9	1	1	1	3	0	0	0	0	0	0	0	0	0	0	0	0	0	0	0	0	0	0	0	0	0	0	0	0	0	0	0	0	0	0	0	0	0	0	0	0	0	0
SPTB1_HUMAN	sp|P11277|SPTB1_HUMAN Spectrin beta chain, erythrocytic OS=Homo sapiens OX=9606 GN=SPTB PE=1 SV=5	5.14581	246316	F215820.dat	Q25506_MS19-036_T4_R4	34	0.7	1	1	1	0	0	0	0	0	0	0	0	0	0	0	0	0	0	0	0	0	0	0	0	0	0	0	0	0	0	0	0	0	0	0	0	0	0	0	0	0	0	0
CAHD1_HUMAN	sp|Q5VU97|CAHD1_HUMAN VWFA and cache domain-containing protein 1 OS=Homo sapiens OX=9606 GN=CACHD1 PE=2 SV=2	5.97232	142198	F215885.dat	Q25550_MS19-036_T3_NR4	34	0.6	1	1	1	1	0	0	0	0	0	0	0	0	0	0	0	0	0	0	0	0	0	0	0	0	0	0	0	0	0	0	0	0	0	0	0	0	0	0	0	0	0	0
MMRN2_HUMAN	sp|Q9H8L6|MMRN2_HUMAN Multimerin-2 OS=Homo sapiens OX=9606 GN=MMRN2 PE=1 SV=2	5.55551	104344	F215899.dat	Q25557_MS19-036_T3_NR15	34	0.9	1	1	1	1	0	0	0	0	0	0	0	0	0	0	0	0	0	0	0	0	0	0	0	0	0	0	0	0	0	0	0	0	0	0	0	0	0	0	0	0	0	0
HV601_HUMAN	sp|A0A0B4J1U7|HV601_HUMAN Immunoglobulin heavy variable 6-1 OS=Homo sapiens OX=9606 GN=IGHV6-1 PE=3 SV=1	9.29942	13473	F215685.dat	Q25477_MS19-036_T4_NR18	34	5.8	1	1	1	14	0	0	0	0	0	0	0	0	0	0	0	0	1	0	0	0	0	0	0	0	0	1	0	0	0	0	1	0	0	0	0	0	0	0	1	0	0	0
CASC3_HUMAN	sp|O15234|CASC3_HUMAN Protein CASC3 OS=Homo sapiens OX=9606 GN=CASC3 PE=1 SV=2	6.05375	76232	F215760.dat	Q25490_MS19-036_T4_NR17	34	1	1	1	1	26	1	0	0	0	0	0	0	1	0	0	0	0	0	0	1	0	1	1	0	1	0	0	0	0	1	0	0	1	0	0	0	2	0	0	0	1	0	1
IL6RB_HUMAN	sp|P40189|IL6RB_HUMAN Interleukin-6 receptor subunit beta OS=Homo sapiens OX=9606 GN=IL6ST PE=1 SV=2	5.62462	103471	F215956.dat	Q25573_MS19-036_T3_NR17	33	1.1	1	1	1	1	0	0	0	0	0	0	0	0	0	0	0	0	0	0	0	0	0	0	0	0	0	0	0	0	0	0	0	0	0	0	0	0	0	0	0	0	0	0
ADCK2_HUMAN	sp|Q7Z695|ADCK2_HUMAN Uncharacterized aarF domain-containing protein kinase 2 OS=Homo sapiens OX=9606 GN=ADCK2 PE=1 SV=1	9.03438	68938	F215757.dat	Q25487_MS19-036_T1(Baseline)_R11	33	1.3	1	1	1	3	0	0	0	0	0	0	0	0	0	0	0	0	0	0	0	0	0	0	0	0	0	1	0	0	0	0	0	0	0	0	0	0	0	0	0	0	0	0
GPC5D_HUMAN	sp|Q9NZD1|GPC5D_HUMAN G-protein coupled receptor family C group 5 member D OS=Homo sapiens OX=9606 GN=GPRC5D PE=1 SV=1	4.86789	38765	F215975.dat	Q25578_MS19-036_T3_NR14	33	2	1	1	1	2	0	0	0	0	0	0	0	0	0	0	0	0	0	0	0	0	0	0	0	0	0	0	0	0	0	0	0	0	0	0	0	0	0	0	0	0	0	0
TMPSD_HUMAN	sp|Q9BYE2|TMPSD_HUMAN Transmembrane protease serine 13 OS=Homo sapiens OX=9606 GN=TMPRSS13 PE=2 SV=5	8.96016	63127	F215793.dat	Q25496_MS19-036_T3_R18	33	1.4	1	1	1	0	0	0	0	0	0	0	0	0	0	0	0	0	0	0	0	0	0	0	0	0	0	0	0	0	0	0	0	0	0	0	0	0	0	0	0	0	0	0
MP2K7_HUMAN	sp|O14733|MP2K7_HUMAN Dual specificity mitogen-activated protein kinase kinase 7 OS=Homo sapiens OX=9606 GN=MAP2K7 PE=1 SV=2	9.26113	47454	F215828.dat	Q25514_MS19-036_T4_R9	33	1.9	1	1	1	93	0	0	0	0	2	0	1	2	0	0	0	0	2	0	0	2	1	2	0	2	1	1	2	2	0	2	2	1	1	1	2	1	0	2	0	1	2	1
HLF_HUMAN	sp|Q16534|HLF_HUMAN Hepatic leukemia factor OS=Homo sapiens OX=9606 GN=HLF PE=2 SV=1	7.75579	33178	F215820.dat	Q25506_MS19-036_T4_R4	33	2.4	1	1	1	1	0	0	0	0	0	0	0	0	0	0	0	0	0	0	0	0	0	0	0	0	0	0	0	0	0	0	0	0	0	0	0	0	0	0	0	0	0	0
SYIC_HUMAN	sp|P41252|SYIC_HUMAN Isoleucine--tRNA ligase, cytoplasmic OS=Homo sapiens OX=9606 GN=IARS PE=1 SV=2	5.82009	144406	F215982.dat	Q25582_MS19-036_T2_NR8	33	0.6	1	1	1	61	1	0	0	0	0	0	0	0	0	0	0	0	0	0	0	0	0	1	0	1	2	0	0	0	2	0	0	3	0	0	0	0	0	0	0	0	0	2
SIA7B_HUMAN	sp|Q9UJ37|SIA7B_HUMAN Alpha-N-acetylgalactosaminide alpha-2,6-sialyltransferase 2 OS=Homo sapiens OX=9606 GN=ST6GALNAC2 PE=1 SV=1	9.38335	41913	F215897.dat	Q25555_MS19-036_T2_NR14	33	1.9	1	1	1	303	2	2	2	2	3	1	2	3	3	0	2	3	3	2	3	3	3	3	0	2	2	3	2	3	2	3	3	2	3	3	1	2	1	3	3	3	3	2
GGT1_HUMAN	sp|P19440|GGT1_HUMAN Glutathione hydrolase 1 proenzyme OS=Homo sapiens OX=9606 GN=GGT1 PE=1 SV=2	6.65269	61372	F215834.dat	Q25520_MS19-036_T2_R17	33	1.4	1	1	1	3	0	0	0	0	0	0	0	0	0	0	0	0	0	0	0	0	0	0	0	0	0	0	0	0	0	0	0	0	0	0	0	1	0	0	0	0	0	0
AATC_HUMAN	sp|P17174|AATC_HUMAN Aspartate aminotransferase, cytoplasmic OS=Homo sapiens OX=9606 GN=GOT1 PE=1 SV=3	6.52556	46219	F215947.dat	Q25572_MS19-036_T4_R10	33	1.9	1	1	1	1	0	0	0	0	0	0	0	0	0	0	0	0	0	0	0	0	0	0	0	0	0	0	0	0	0	0	0	0	0	0	0	0	0	0	0	0	0	0
LCA5_HUMAN	sp|Q86VQ0|LCA5_HUMAN Lebercilin OS=Homo sapiens OX=9606 GN=LCA5 PE=1 SV=2	7.30857	80505	F215828.dat	Q25514_MS19-036_T4_R9	33	1.3	1	1	1	51	0	0	0	0	0	0	0	0	0	0	0	0	0	0	1	0	0	0	0	0	0	1	0	0	0	0	0	0	0	0	1	1	1	0	1	0	0	0
TSR1_HUMAN	sp|Q2NL82|TSR1_HUMAN Pre-rRNA-processing protein TSR1 homolog OS=Homo sapiens OX=9606 GN=TSR1 PE=1 SV=1	6.9782	91752	F215839.dat	Q25525_MS19-036_T2_R13	32	0.9	1	1	1	24	0	0	0	0	1	0	0	0	0	0	0	0	0	0	0	1	0	0	1	0	0	0	0	1	0	0	0	0	0	1	0	0	0	0	0	1	0	1
SMCA2_HUMAN	sp|P51531|SMCA2_HUMAN Probable global transcription activator SNF2L2 OS=Homo sapiens OX=9606 GN=SMARCA2 PE=1 SV=2	6.75681	181166	F215926.dat	Q25569_MS19-036_T4_NR10	32	0.6	1	1	1	1	0	0	0	0	0	0	0	0	0	0	0	0	0	0	0	0	0	0	0	0	0	0	0	0	0	0	0	0	0	0	0	0	0	0	0	0	0	0
RN219_HUMAN	sp|Q5W0B1|RN219_HUMAN RING finger protein 219 OS=Homo sapiens OX=9606 GN=RNF219 PE=1 SV=1	5.52735	81066	F215921.dat	Q25564_MS19-036_T4_R6	32	1	1	1	1	17	0	0	0	0	0	0	0	0	1	0	0	0	0	0	0	0	0	0	0	0	0	0	0	1	0	0	1	0	0	0	0	0	0	0	0	0	0	0
ADCY3_HUMAN	sp|O60266|ADCY3_HUMAN Adenylate cyclase type 3 OS=Homo sapiens OX=9606 GN=ADCY3 PE=1 SV=3	6.1499	128877	F215947.dat	Q25572_MS19-036_T4_R10	32	0.7	1	1	1	12	0	0	0	0	0	0	0	0	0	0	0	0	0	0	0	0	0	0	0	0	0	0	0	0	0	0	1	0	0	0	0	0	0	0	0	0	0	0
CTGE2_HUMAN	sp|Q96RT6|CTGE2_HUMAN cTAGE family member 2 OS=Homo sapiens OX=9606 GN=CTAGE1 PE=1 SV=2	5.84754	85228	F215839.dat	Q25525_MS19-036_T2_R13	32	1.2	1	1	1	26	1	0	0	0	1	0	0	1	1	0	0	0	0	1	0	0	0	1	0	0	0	0	0	0	1	0	0	1	0	1	1	0	1	0	0	0	0	0
TPPC4_HUMAN	sp|Q9Y296|TPPC4_HUMAN Trafficking protein particle complex subunit 4 OS=Homo sapiens OX=9606 GN=TRAPPC4 PE=1 SV=1	5.83517	24325	F215809.dat	Q25498_MS19-036_T2_NR12	32	4.1	1	1	1	3	0	0	1	0	0	0	0	0	0	0	0	0	0	0	0	0	0	0	0	0	0	0	0	0	0	0	0	0	0	0	0	0	1	0	0	0	0	0
COQ5_HUMAN	sp|Q5HYK3|COQ5_HUMAN 2-methoxy-6-polyprenyl-1,4-benzoquinol methylase, mitochondrial OS=Homo sapiens OX=9606 GN=COQ5 PE=1 SV=2	6.46795	37117	F215873.dat	Q25543_MS19-036_T3_NR11	32	2.1	1	1	1	10	0	0	0	0	0	0	0	0	0	0	0	1	0	0	0	0	0	0	0	0	0	1	0	0	0	0	0	0	0	0	0	0	0	0	0	0	0	0
ENPLL_HUMAN	sp|Q58FF3|ENPLL_HUMAN Putative endoplasmin-like protein OS=Homo sapiens OX=9606 GN=HSP90B2P PE=5 SV=1	5.14116	45830	F215878.dat	Q25548_MS19-036_T4_NR9	32	2	1	1	1	0	0	0	0	0	0	0	0	0	0	0	0	0	0	0	0	0	0	0	0	0	0	0	0	0	0	0	0	0	0	0	0	0	0	0	0	0	0	0
HD_HUMAN	sp|P42858|HD_HUMAN Huntingtin OS=Homo sapiens OX=9606 GN=HTT PE=1 SV=2	5.80798	347383	F215833.dat	Q25519_MS19-036_T2_R7	32	0.3	1	1	1	1	0	0	0	0	0	0	0	0	0	0	0	0	0	0	0	0	0	0	0	0	0	0	0	0	0	0	0	0	0	0	0	0	0	0	0	0	0	0
ITA2B_HUMAN	sp|P08514|ITA2B_HUMAN Integrin alpha-IIb OS=Homo sapiens OX=9606 GN=ITGA2B PE=1 SV=3	5.20787	113305	F215829.dat	Q25515_MS19-036_T2_R16	32	1.9	1	1	1	4	0	0	0	0	0	0	0	0	0	0	0	0	0	0	0	0	0	0	0	0	0	0	0	0	0	0	0	0	0	0	0	0	0	0	0	0	0	0
CH10_HUMAN	sp|P61604|CH10_HUMAN 10 kDa heat shock protein, mitochondrial OS=Homo sapiens OX=9606 GN=HSPE1 PE=1 SV=2	8.89069	10925	F215827.dat	Q25513_MS19-036_T2_R11	32	6.9	1	1	1	2	1	0	0	0	0	0	0	0	0	0	0	0	0	0	0	0	0	0	0	0	0	0	0	0	0	0	0	0	0	0	0	0	0	0	0	0	0	0
HPPD_HUMAN	sp|P32754|HPPD_HUMAN 4-hydroxyphenylpyruvate dioxygenase OS=Homo sapiens OX=9606 GN=HPD PE=1 SV=2	6.51671	44906	F215947.dat	Q25572_MS19-036_T4_R10	32	2.3	1	1	1	1	0	0	0	0	0	0	0	0	0	0	0	0	0	0	0	0	0	0	0	0	0	0	0	0	0	0	0	0	0	0	0	0	0	0	0	0	0	0
RYR1_HUMAN	sp|P21817|RYR1_HUMAN Ryanodine receptor 1 OS=Homo sapiens OX=9606 GN=RYR1 PE=1 SV=3	5.1799	564815	F215689.dat	Q25481_MS19-036_T2_NR13	32	0.1	1	1	1	74	1	0	0	1	0	0	1	1	1	0	0	0	1	2	0	1	1	2	0	1	1	1	1	1	1	1	1	0	1	0	1	1	0	1	2	0	1	1
ZN479_HUMAN	sp|Q96JC4|ZN479_HUMAN Zinc finger protein 479 OS=Homo sapiens OX=9606 GN=ZNF479 PE=2 SV=1	9.20628	60559	F215851.dat	Q25537_MS19-036_T3_R9	32	1.3	1	1	1	1	0	0	0	0	0	0	0	0	0	0	0	0	0	0	0	0	0	0	0	0	0	0	0	0	0	0	0	0	0	0	0	0	0	0	0	0	0	0
VPS36_HUMAN	sp|Q86VN1|VPS36_HUMAN Vacuolar protein-sorting-associated protein 36 OS=Homo sapiens OX=9606 GN=VPS36 PE=1 SV=1	6.74526	43789	F215668.dat	Q25467_MS19-036_T4_R18	32	1.8	1	1	1	7	0	0	1	0	0	0	0	0	0	0	0	0	0	0	0	0	0	0	0	0	0	0	0	0	0	0	0	0	0	0	0	0	0	1	0	0	1	0
DOP1_HUMAN	sp|Q5JWR5|DOP1_HUMAN Protein dopey-1 OS=Homo sapiens OX=9606 GN=DOP1A PE=2 SV=1	5.87842	277179	F215906.dat	Q25561_MS19-036_T4_NR2	32	0.3	1	1	1	23	0	0	0	0	0	0	0	0	0	0	0	0	0	0	0	0	0	0	0	0	0	0	0	0	1	0	0	1	0	1	0	0	0	0	1	0	0	0
TS1R1_HUMAN	sp|Q7RTX1|TS1R1_HUMAN Taste receptor type 1 member 1 OS=Homo sapiens OX=9606 GN=TAS1R1 PE=2 SV=1	8.32084	93013	F215825.dat	Q25511_MS19-036_T1(Baseline)_NR6	32	1.3	1	1	1	6	0	0	0	0	0	0	0	0	0	0	0	0	0	0	0	0	0	0	0	0	0	0	0	0	0	0	0	0	0	0	0	1	0	0	0	0	0	0
RL9_HUMAN	sp|P32969|RL9_HUMAN 60S ribosomal protein L9 OS=Homo sapiens OX=9606 GN=RPL9 PE=1 SV=1	9.96292	21850	F215666.dat	Q25465_MS19-036_T2_NR17	32	14.1	1	1	1	1	1	0	0	0	0	0	0	0	0	0	0	0	0	0	0	0	0	0	0	0	0	0	0	0	0	0	0	0	0	0	0	0	0	0	0	0	0	0
GLD2_HUMAN	sp|Q6PIY7|GLD2_HUMAN Poly(A) RNA polymerase GLD2 OS=Homo sapiens OX=9606 GN=TENT2 PE=1 SV=1	9.45175	55992	F215830.dat	Q25516_MS19-036_T1(Baseline)_NR7	32	1.4	1	1	1	11	0	0	0	0	0	0	0	0	0	0	0	0	0	0	0	0	0	0	0	0	0	0	0	0	0	0	0	0	0	0	0	0	0	0	0	0	0	0
CP100_HUMAN	sp|Q494V2|CP100_HUMAN Cilia- and flagella-associated protein 100 OS=Homo sapiens OX=9606 GN=CFAP100 PE=2 SV=1	6.65187	71073	F215980.dat	Q25581_MS19-036_T4_NR5	32	1.6	1	1	1	59	0	0	0	0	0	0	0	0	0	0	0	0	0	0	0	1	0	0	0	0	0	1	1	0	0	0	2	0	0	0	0	0	0	0	1	0	0	0
UBP19_HUMAN	sp|O94966|UBP19_HUMAN Ubiquitin carboxyl-terminal hydrolase 19 OS=Homo sapiens OX=9606 GN=USP19 PE=1 SV=2	5.89084	145559	F215849.dat	Q25535_MS19-036_T2_R10	32	0.6	1	1	1	1	0	0	0	0	0	0	0	0	0	0	0	0	0	0	0	0	0	0	0	0	0	0	0	0	0	0	0	0	0	0	0	0	0	0	0	0	0	0
RNF6_HUMAN	sp|Q9Y252|RNF6_HUMAN E3 ubiquitin-protein ligase RNF6 OS=Homo sapiens OX=9606 GN=RNF6 PE=1 SV=1	9.15808	78045	F215791.dat	Q25495_MS19-036_T4_NR16	32	1.2	1	1	1	1	0	0	0	0	0	0	0	0	0	0	0	0	0	0	0	0	0	0	0	0	0	0	0	0	0	0	0	0	0	1	0	0	0	0	0	0	0	0
LAMA2_HUMAN	sp|P24043|LAMA2_HUMAN Laminin subunit alpha-2 OS=Homo sapiens OX=9606 GN=LAMA2 PE=1 SV=4	6.00928	343684	F215668.dat	Q25467_MS19-036_T4_R18	32	0.2	1	1	1	5	0	0	1	0	0	0	0	0	1	0	0	0	0	0	0	0	0	0	0	0	0	0	0	0	0	0	0	0	0	0	0	0	0	0	0	0	0	0
DYH8_HUMAN	sp|Q96JB1|DYH8_HUMAN Dynein heavy chain 8, axonemal OS=Homo sapiens OX=9606 GN=DNAH8 PE=1 SV=2	5.94855	514335	F215898.dat	Q25556_MS19-036_T2_NR1	32	0.2	1	1	1	2	0	0	0	0	0	0	0	0	0	0	0	0	0	0	0	0	0	0	0	0	0	0	0	0	0	0	0	0	0	0	0	0	0	0	0	0	0	0
TRM11_HUMAN	sp|Q7Z4G4|TRM11_HUMAN tRNA (guanine(10)-N2)-methyltransferase homolog OS=Homo sapiens OX=9606 GN=TRMT11 PE=1 SV=1	7.65233	53387	F215686.dat	Q25478_MS19-036_T3_NR2	32	1.5	1	1	1	913	8	7	8	11	8	4	7	12	10	4	8	7	5	11	8	5	7	10	7	7	8	10	10	10	7	5	6	7	10	4	6	7	7	7	8	11	10	9
DIAP2_HUMAN	sp|O60879|DIAP2_HUMAN Protein diaphanous homolog 2 OS=Homo sapiens OX=9606 GN=DIAPH2 PE=1 SV=1	6.19769	125490	F215873.dat	Q25543_MS19-036_T3_NR11	32	0.9	1	1	1	5	0	0	0	0	0	0	0	0	0	0	0	0	0	0	0	0	0	0	0	0	0	0	0	0	0	0	0	0	0	0	0	0	0	0	0	0	0	0
VP13D_HUMAN	sp|Q5THJ4|VP13D_HUMAN Vacuolar protein sorting-associated protein 13D OS=Homo sapiens OX=9606 GN=VPS13D PE=1 SV=2	6.14898	491606	F215691.dat	Q25482_MS19-036_T1(Baseline)_NR2	32	0.2	1	1	1	5	0	0	0	0	0	0	0	0	0	0	0	0	0	0	0	1	0	1	0	0	0	0	0	0	0	0	0	0	0	0	0	0	1	0	0	0	0	0
ATS12_HUMAN	sp|P58397|ATS12_HUMAN A disintegrin and metalloproteinase with thrombospondin motifs 12 OS=Homo sapiens OX=9606 GN=ADAMTS12 PE=1 SV=2	8.24702	177560	F215667.dat	Q25466_MS19-036_T3_R11	32	0.5	1	1	1	6	0	1	0	0	0	0	0	0	0	0	1	1	1	0	0	0	1	0	0	0	0	0	0	0	0	0	0	0	0	0	0	0	0	0	0	0	0	0
NRX2B_HUMAN	sp|P58401|NRX2B_HUMAN Neurexin-2-beta OS=Homo sapiens OX=9606 GN=NRXN2 PE=1 SV=1	5.9556	70883	F215704.dat	Q25483_MS19-036_T4_R17	31	2	1	1	1	24	0	0	0	5	0	0	1	0	0	0	0	0	0	0	0	0	0	0	5	0	0	0	4	0	0	0	0	0	0	0	0	0	0	1	0	0	0	0
TEP1_HUMAN	sp|Q99973|TEP1_HUMAN Telomerase protein component 1 OS=Homo sapiens OX=9606 GN=TEP1 PE=1 SV=2	8.26333	290307	F215936.dat	Q25571_MS19-036_T1(Baseline)_NR5	31	0.3	1	1	1	1	0	0	0	0	0	0	0	0	0	0	0	0	0	0	0	0	0	0	0	0	0	0	0	0	0	0	0	0	0	0	0	0	0	0	0	0	0	0
PLCG1_HUMAN	sp|P19174|PLCG1_HUMAN 1-phosphatidylinositol 4,5-bisphosphate phosphodiesterase gamma-1 OS=Homo sapiens OX=9606 GN=PLCG1 PE=1 SV=1	5.72778	148438	F215687.dat	Q25479_MS19-036_T1(Baseline)_NR9	31	0.5	1	1	1	7	0	0	0	0	1	0	0	0	0	0	0	0	0	0	1	1	0	0	1	0	0	0	0	0	0	0	0	0	0	0	0	0	0	0	0	0	0	0
L37A2_HUMAN	sp|A6NM11|L37A2_HUMAN Leucine-rich repeat-containing protein 37A2 OS=Homo sapiens OX=9606 GN=LRRC37A2 PE=2 SV=2	5.33249	188276	F215895.dat	Q25553_MS19-036_T3_NR16	31	0.5	1	1	1	1	0	0	0	0	0	0	0	0	0	0	0	0	0	0	0	0	0	0	0	0	0	0	0	0	0	0	0	0	0	0	0	0	0	0	0	0	0	0
PRELP_HUMAN	sp|P51888|PRELP_HUMAN Prolargin OS=Homo sapiens OX=9606 GN=PRELP PE=1 SV=1	9.46954	43782	F215888.dat	Q25551_MS19-036_T4_R5	31	2.4	1	1	1	16	1	1	1	0	0	1	1	0	0	0	0	1	0	1	1	0	0	0	0	0	0	0	0	0	0	0	0	0	0	0	0	0	0	0	0	0	0	0
NPT2B_HUMAN	sp|O95436|NPT2B_HUMAN Sodium-dependent phosphate transport protein 2B OS=Homo sapiens OX=9606 GN=SLC34A2 PE=1 SV=3	8.53788	75710	F215675.dat	Q25474_MS19-036_T1(Baseline)_R9	31	1	1	1	1	277	2	3	3	3	3	2	3	3	3	1	2	3	2	3	3	2	3	3	2	3	3	2	3	3	2	2	3	2	2	3	3	2	2	3	2	3	3	3
MRC1_HUMAN	sp|P22897|MRC1_HUMAN Macrophage mannose receptor 1 OS=Homo sapiens OX=9606 GN=MRC1 PE=1 SV=1	6.1131	165905	F215947.dat	Q25572_MS19-036_T4_R10	31	0.6	1	1	1	1	0	0	0	0	0	0	0	0	0	0	0	0	0	0	0	0	0	0	0	0	0	0	0	0	0	0	0	0	0	0	0	0	0	0	0	0	0	0
KRA52_HUMAN	sp|Q701N4|KRA52_HUMAN Keratin-associated protein 5-2 OS=Homo sapiens OX=9606 GN=KRTAP5-2 PE=1 SV=1	8.31164	16257	F215851.dat	Q25537_MS19-036_T3_R9	31	15.3	1	1	1	1	0	0	0	0	0	0	0	0	0	0	0	0	0	0	0	0	0	0	0	0	0	0	0	0	0	0	0	0	0	0	0	0	0	0	0	0	0	0
M3K13_HUMAN	sp|O43283|M3K13_HUMAN Mitogen-activated protein kinase kinase kinase 13 OS=Homo sapiens OX=9606 GN=MAP3K13 PE=1 SV=1	6.04623	108228	F215936.dat	Q25571_MS19-036_T1(Baseline)_NR5	31	0.7	1	1	1	1	0	0	0	0	0	0	0	0	0	0	0	0	0	0	0	0	0	0	0	0	0	0	0	0	0	0	0	0	0	0	0	0	0	0	0	0	0	0
CMGA_HUMAN	sp|P10645|CMGA_HUMAN Chromogranin-A OS=Homo sapiens OX=9606 GN=CHGA PE=1 SV=7	4.58393	50658	F215975.dat	Q25578_MS19-036_T3_NR14	31	2.4	1	1	1	3	0	0	0	0	0	0	0	0	0	0	0	0	0	0	0	0	0	0	0	0	0	0	0	0	0	0	0	0	0	0	0	0	0	0	0	0	0	0
PTPRQ_HUMAN	sp|Q9UMZ3|PTPRQ_HUMAN Phosphatidylinositol phosphatase PTPRQ OS=Homo sapiens OX=9606 GN=PTPRQ PE=1 SV=2	5.56798	260760	F215672.dat	Q25471_MS19-036_T3_R8	31	0.3	1	1	1	5	2	1	0	0	0	0	1	0	0	0	1	0	0	0	0	0	0	0	0	0	0	0	0	0	0	0	0	0	0	0	0	0	0	0	0	0	0	0
GDE_HUMAN	sp|P35573|GDE_HUMAN Glycogen debranching enzyme OS=Homo sapiens OX=9606 GN=AGL PE=1 SV=3	6.308	174652	F215956.dat	Q25573_MS19-036_T3_NR17	31	0.5	1	1	1	19	0	0	1	0	0	0	0	0	0	0	0	0	0	0	0	1	0	0	0	0	0	0	0	0	0	0	1	0	0	0	0	0	1	0	0	0	0	0
EAA5_HUMAN	sp|O00341|EAA5_HUMAN Excitatory amino acid transporter 5 OS=Homo sapiens OX=9606 GN=SLC1A7 PE=2 SV=2	6.3329	60619	F215835.dat	Q25521_MS19-036_T3_NR3	31	1.4	1	1	1	7	1	0	0	0	1	0	0	0	0	0	0	0	0	0	0	0	0	1	0	0	0	0	0	2	0	0	0	0	0	0	0	0	0	0	0	0	0	0
TIE2_HUMAN	sp|Q02763|TIE2_HUMAN Angiopoietin-1 receptor OS=Homo sapiens OX=9606 GN=TEK PE=1 SV=2	6.46151	125749	F215847.dat	Q25533_MS19-036_T2_R18	30	0.6	1	1	1	65	1	0	2	0	0	0	1	0	0	0	0	0	0	1	1	0	1	0	1	1	1	1	0	0	0	0	0	1	0	1	0	0	1	0	1	0	0	0
EDRF1_HUMAN	sp|Q3B7T1|EDRF1_HUMAN Erythroid differentiation-related factor 1 OS=Homo sapiens OX=9606 GN=EDRF1 PE=1 SV=1	5.93393	138440	F215849.dat	Q25535_MS19-036_T2_R10	30	0.6	1	1	1	17	0	0	0	0	0	0	0	0	0	0	0	0	0	0	0	0	0	0	0	1	0	0	0	0	0	0	0	0	0	0	0	0	1	0	0	0	0	0
TSR2_HUMAN	sp|Q969E8|TSR2_HUMAN Pre-rRNA-processing protein TSR2 homolog OS=Homo sapiens OX=9606 GN=TSR2 PE=1 SV=1	4.24779	20881	F215827.dat	Q25513_MS19-036_T2_R11	30	3.7	1	1	1	1	0	0	0	0	0	0	0	0	0	0	0	0	0	0	0	0	0	0	0	0	0	0	0	0	0	0	0	0	0	0	0	0	0	0	0	0	0	0
PLEK_HUMAN	sp|P08567|PLEK_HUMAN Pleckstrin OS=Homo sapiens OX=9606 GN=PLEK PE=1 SV=3	8.50752	40099	F215819.dat	Q25505_MS19-036_T2_R6	30	2.6	1	1	1	1	0	0	0	0	0	0	0	0	0	0	0	0	0	0	0	0	0	0	0	0	0	0	0	0	0	0	0	0	0	0	0	0	0	0	0	0	0	0
GARS_HUMAN	sp|P41250|GARS_HUMAN Glycine--tRNA ligase OS=Homo sapiens OX=9606 GN=GARS PE=1 SV=3	6.60959	83113	F215666.dat	Q25465_MS19-036_T2_NR17	30	1.8	1	1	1	1	1	0	0	0	0	0	0	0	0	0	0	0	0	0	0	0	0	0	0	0	0	0	0	0	0	0	0	0	0	0	0	0	0	0	0	0	0	0
PLP2_HUMAN	sp|Q04941|PLP2_HUMAN Proteolipid protein 2 OS=Homo sapiens OX=9606 GN=PLP2 PE=1 SV=1	6.79586	16680	F215921.dat	Q25564_MS19-036_T4_R6	30	8.6	1	1	1	2	0	0	0	0	0	0	0	0	0	0	0	0	0	0	0	0	0	0	0	0	0	0	0	0	0	0	0	0	0	0	0	0	0	0	0	0	0	0
MYH11_HUMAN	sp|P35749|MYH11_HUMAN Myosin-11 OS=Homo sapiens OX=9606 GN=MYH11 PE=1 SV=3	5.42307	227199	F215849.dat	Q25535_MS19-036_T2_R10	30	0.4	1	1	1	14	0	0	0	0	0	0	0	0	0	0	0	0	1	1	0	0	0	1	0	0	0	0	0	0	0	0	0	0	0	0	0	0	0	0	1	0	0	0
CDKL3_HUMAN	sp|Q8IVW4|CDKL3_HUMAN Cyclin-dependent kinase-like 3 OS=Homo sapiens OX=9606 GN=CDKL3 PE=1 SV=1	9.35488	67471	F215848.dat	Q25534_MS19-036_T3_R14	30	1.2	1	1	1	0	0	0	0	0	0	0	0	0	0	0	0	0	0	0	0	0	0	0	0	0	0	0	0	0	0	0	0	0	0	0	0	0	0	0	0	0	0	0
GPTC8_HUMAN	sp|Q9UKJ3|GPTC8_HUMAN G patch domain-containing protein 8 OS=Homo sapiens OX=9606 GN=GPATCH8 PE=1 SV=2	8.81452	164098	F215851.dat	Q25537_MS19-036_T3_R9	30	1.1	1	1	1	3	0	0	0	0	0	0	0	0	0	0	0	0	0	0	0	0	0	0	0	0	0	0	0	0	0	0	0	0	0	0	0	0	0	0	0	0	0	0
PPGB_HUMAN	sp|P10619|PPGB_HUMAN Lysosomal protective protein OS=Homo sapiens OX=9606 GN=CTSA PE=1 SV=2	6.16063	54431	F215868.dat	Q25541_MS19-036_T1(Baseline)_NR3	30	2.7	1	1	1	1	0	0	0	0	0	0	0	0	0	0	0	0	0	0	0	0	0	0	0	0	0	0	0	0	0	0	0	0	0	0	0	0	0	0	0	0	0	0
ARRC_HUMAN	sp|P36575|ARRC_HUMAN Arrestin-C OS=Homo sapiens OX=9606 GN=ARR3 PE=1 SV=2	5.53292	42751	F215985.dat	Q25585_MS19-036_T3_NR9	30	1.8	1	1	1	6	0	0	0	0	0	0	0	0	0	0	0	0	0	0	0	0	0	0	0	0	0	0	0	0	0	0	0	0	0	0	0	0	0	0	0	0	0	0
DAAM1_HUMAN	sp|Q9Y4D1|DAAM1_HUMAN Disheveled-associated activator of morphogenesis 1 OS=Homo sapiens OX=9606 GN=DAAM1 PE=1 SV=2	6.80915	123396	F215922.dat	Q25565_MS19-036_T3_NR10	30	0.6	1	1	1	1	0	0	0	0	0	0	0	0	0	0	0	0	0	0	0	0	0	0	0	0	0	0	0	0	0	0	0	0	0	0	0	0	0	0	0	0	0	0
PRDX6_HUMAN	sp|P30041|PRDX6_HUMAN Peroxiredoxin-6 OS=Homo sapiens OX=9606 GN=PRDX6 PE=1 SV=3	5.99701	25019	F215828.dat	Q25514_MS19-036_T4_R9	30	4.5	1	1	1	5	0	0	0	0	0	0	0	0	0	0	0	0	0	0	0	0	0	0	0	0	0	0	0	0	0	0	0	0	0	0	0	0	0	0	0	0	0	0
KTN1_HUMAN	sp|Q86UP2|KTN1_HUMAN Kinectin OS=Homo sapiens OX=9606 GN=KTN1 PE=1 SV=1	5.5183	156179	F215846.dat	Q25532_MS19-036_T2_NR18	30	0.6	1	1	1	3	0	0	0	0	0	0	0	0	0	0	0	0	0	0	0	0	0	0	0	0	0	0	0	0	0	0	0	0	0	0	0	0	0	0	0	0	0	0
GTR1_HUMAN	sp|P11166|GTR1_HUMAN Solute carrier family 2, facilitated glucose transporter member 1 OS=Homo sapiens OX=9606 GN=SLC2A1 PE=1 SV=2	8.92601	54049	F215832.dat	Q25518_MS19-036_T3_R6	30	2.2	1	1	1	5	0	0	0	0	0	0	0	0	0	0	0	0	0	0	0	0	0	0	0	0	0	0	0	0	0	0	1	0	0	0	0	0	0	0	0	0	0	0
SPTCS_HUMAN	Spatacsin OS=Homo sapiens OX=9606 GN=SPG11 PE=1 SV=3	5.63326	278689	F215840.dat	Q25526_MS19-036_T1(Baseline)_NR15	30	0.3	1	1	1	2	0	0	0	0	0	0	0	0	0	0	0	0	0	0	0	0	0	0	0	0	0	0	0	0	0	0	0	0	0	0	0	0	0	0	0	0	0	0
GBRA1_HUMAN	sp|P14867|GBRA1_HUMAN Gamma-aminobutyric acid receptor subunit alpha-1 OS=Homo sapiens OX=9606 GN=GABRA1 PE=1 SV=3	9.27095	51769	F215845.dat	Q25531_MS19-036_T3_R10	30	1.5	1	1	1	42	0	0	0	0	0	0	0	1	0	0	0	1	1	0	1	0	1	0	0	0	1	1	1	0	0	2	0	0	0	0	1	1	1	1	0	0	0	1
CALL5_HUMAN	sp|Q9NZT1|CALL5_HUMAN Calmodulin-like protein 5 OS=Homo sapiens OX=9606 GN=CALML5 PE=1 SV=2	4.34072	15883	F215851.dat	Q25537_MS19-036_T3_R9	30	11.6	1	1	1	1	0	0	0	0	0	0	0	0	0	0	0	0	0	0	0	0	0	0	0	0	0	0	0	0	0	0	0	0	0	0	0	0	0	0	0	0	0	0
SCAPE_HUMAN	sp|Q9BY12|SCAPE_HUMAN S phase cyclin A-associated protein in the endoplasmic reticulum OS=Homo sapiens OX=9606 GN=SCAPER PE=1 SV=2	7.20659	158188	F215947.dat	Q25572_MS19-036_T4_R10	30	0.6	1	1	1	17	0	0	0	0	0	0	0	0	0	0	0	0	1	0	0	0	0	0	0	0	0	0	0	0	0	1	1	1	0	0	0	0	0	1	1	0	0	0
HS90A_HUMAN	sp|P07900|HS90A_HUMAN Heat shock protein HSP 90-alpha OS=Homo sapiens OX=9606 GN=HSP90AA1 PE=1 SV=5	4.94272	84607	F215851.dat	Q25537_MS19-036_T3_R9	30	1	1	1	1	0	0	0	0	0	0	0	0	0	0	0	0	0	0	0	0	0	0	0	0	0	0	0	0	0	0	0	0	0	0	0	0	0	0	0	0	0	0	0
SNX32_HUMAN	sp|Q86XE0|SNX32_HUMAN Sorting nexin-32 OS=Homo sapiens OX=9606 GN=SNX32 PE=1 SV=1	6.63122	46370	F215895.dat	Q25553_MS19-036_T3_NR16	30	1.7	1	1	1	32	0	0	0	0	0	0	0	0	0	0	0	0	0	0	0	1	0	0	0	0	0	1	0	1	0	0	1	0	0	1	0	0	0	0	1	0	0	0
PCGF5_HUMAN	sp|Q86SE9|PCGF5_HUMAN Polycomb group RING finger protein 5 OS=Homo sapiens OX=9606 GN=PCGF5 PE=1 SV=1	6.11264	29694	F215902.dat	Q25559_MS19-036_T4_NR7	30	2.7	1	1	1	21	0	0	0	0	0	0	0	0	0	0	0	0	0	1	0	0	0	0	0	0	0	0	0	1	0	0	0	0	1	0	1	0	0	0	0	1	0	0
TGM3L_HUMAN	sp|O95932|TGM3L_HUMAN Protein-glutamine gamma-glutamyltransferase 6 OS=Homo sapiens OX=9606 GN=TGM6 PE=1 SV=3	6.8454	79263	F215839.dat	Q25525_MS19-036_T2_R13	30	2.1	1	1	1	21	0	0	0	0	0	0	0	0	0	0	0	0	0	0	0	0	0	0	0	0	0	0	0	0	0	0	0	0	0	0	0	0	0	1	0	0	0	0
GLT18_HUMAN	sp|Q6P9A2|GLT18_HUMAN Polypeptide N-acetylgalactosaminyltransferase 18 OS=Homo sapiens OX=9606 GN=GALNT18 PE=2 SV=2	6.06908	69516	F215821.dat	Q25507_MS19-036_T3_NR1	29	1.5	1	1	1	1	0	0	0	0	0	0	0	0	0	0	0	0	0	0	0	0	0	0	0	0	0	0	0	0	0	0	0	0	0	0	0	0	0	0	0	0	0	0
PCX4_HUMAN	sp|Q63HM2|PCX4_HUMAN Pecanex-like protein 4 OS=Homo sapiens OX=9606 GN=PCNX4 PE=1 SV=4	5.88036	132616	F215923.dat	Q25566_MS19-036_T2_NR16	29	0.6	1	1	1	1	0	0	0	0	0	0	0	0	0	0	0	0	0	0	0	0	0	0	0	0	0	0	0	0	0	0	0	0	0	0	0	0	0	0	0	0	0	0
CRML_HUMAN	sp|Q96RY5|CRML_HUMAN Protein cramped-like OS=Homo sapiens OX=9606 GN=CRAMP1 PE=1 SV=3	8.08386	134635	F215846.dat	Q25532_MS19-036_T2_NR18	29	0.6	1	1	1	621	6	6	6	4	4	3	7	4	6	1	6	7	6	5	6	7	6	3	5	6	8	6	3	2	9	7	6	7	5	8	7	6	4	4	5	5	5	7
AT2A3_HUMAN	sp|Q93084|AT2A3_HUMAN Sarcoplasmic/endoplasmic reticulum calcium ATPase 3 OS=Homo sapiens OX=9606 GN=ATP2A3 PE=1 SV=2	5.41724	113904	F215984.dat	Q25584_MS19-036_T4_R8	29	0.7	1	1	1	93	0	0	0	0	2	0	0	2	0	0	0	0	1	0	0	2	0	0	0	0	2	2	0	0	2	3	0	0	0	0	0	2	0	0	2	0	0	0
AP4S1_HUMAN	sp|Q9Y587|AP4S1_HUMAN AP-4 complex subunit sigma-1 OS=Homo sapiens OX=9606 GN=AP4S1 PE=1 SV=1	5.08314	16994	F215837.dat	Q25523_MS19-036_T4_NR14	29	5.6	1	1	1	13	0	0	0	0	0	0	0	0	0	0	0	0	0	0	0	0	1	0	0	0	0	0	1	0	0	0	0	1	0	1	0	0	0	0	0	0	0	0
CEP70_HUMAN	sp|Q8NHQ1|CEP70_HUMAN Centrosomal protein of 70 kDa OS=Homo sapiens OX=9606 GN=CEP70 PE=1 SV=2	5.51845	69708	F215821.dat	Q25507_MS19-036_T3_NR1	29	1.5	1	1	1	8	0	0	0	0	0	0	0	0	0	0	0	0	0	0	0	0	0	0	0	0	0	0	0	0	0	0	0	0	0	0	0	0	0	0	0	1	0	0
SETBP_HUMAN	sp|Q9Y6X0|SETBP_HUMAN SET-binding protein OS=Homo sapiens OX=9606 GN=SETBP1 PE=1 SV=3	9.75886	174899	F215924.dat	Q25567_MS19-036_T4_R14	29	0.8	1	1	1	1	0	0	0	0	0	0	0	0	0	0	0	0	0	0	0	0	0	0	0	0	0	0	0	0	0	0	0	0	0	0	0	0	0	0	0	0	0	0
MED14_HUMAN	sp|O60244|MED14_HUMAN Mediator of RNA polymerase II transcription subunit 14 OS=Homo sapiens OX=9606 GN=MED14 PE=1 SV=2	8.97472	160504	F215848.dat	Q25534_MS19-036_T3_R14	29	0.8	1	1	1	7	0	0	0	0	0	0	0	1	0	0	0	0	0	0	0	0	1	2	0	0	0	0	0	0	0	0	0	0	0	0	0	0	0	0	0	0	0	0
CHD8_HUMAN	sp|Q9HCK8|CHD8_HUMAN Chromodomain-helicase-DNA-binding protein 8 OS=Homo sapiens OX=9606 GN=CHD8 PE=1 SV=5	6.04404	290338	F215847.dat	Q25533_MS19-036_T2_R18	29	0.4	1	1	1	7	0	0	0	0	0	0	1	0	0	0	0	0	0	0	0	0	0	1	0	1	0	0	0	0	0	0	0	0	0	0	0	0	0	0	0	1	0	0
UROM_HUMAN	sp|P07911|UROM_HUMAN Uromodulin OS=Homo sapiens OX=9606 GN=UMOD PE=1 SV=1	5.05022	69714	F215927.dat	Q25570_MS19-036_T4_R11	29	1.1	1	1	1	1	0	0	0	0	0	0	0	0	0	0	0	0	0	0	0	0	0	0	0	0	0	0	0	0	0	0	0	0	0	0	0	0	0	0	0	0	0	0
GDIR2_HUMAN	sp|P52566|GDIR2_HUMAN Rho GDP-dissociation inhibitor 2 OS=Homo sapiens OX=9606 GN=ARHGDIB PE=1 SV=3	5.10231	22974	F215924.dat	Q25567_MS19-036_T4_R14	29	3.5	1	1	1	4	0	0	0	0	0	0	0	0	0	0	0	0	0	0	0	0	0	0	0	0	0	0	0	0	0	0	0	0	0	0	0	0	0	0	0	0	0	0
STAB1_HUMAN	sp|Q9NY15|STAB1_HUMAN Stabilin-1 OS=Homo sapiens OX=9606 GN=STAB1 PE=1 SV=3	6.05339	275300	F215808.dat	Q25497_MS19-036_T4_NR15	29	0.4	1	1	1	1	0	0	0	0	0	0	0	0	0	0	0	0	0	0	0	0	0	0	0	0	0	0	0	0	0	0	0	0	0	0	0	1	0	0	0	0	0	0
ANPRB_HUMAN	sp|P20594|ANPRB_HUMAN Atrial natriuretic peptide receptor 2 OS=Homo sapiens OX=9606 GN=NPR2 PE=1 SV=1	6.40952	116948	F215691.dat	Q25482_MS19-036_T1(Baseline)_NR2	29	0.7	1	1	1	1	0	0	0	0	0	0	0	0	0	0	0	0	0	0	0	0	0	1	0	0	0	0	0	0	0	0	0	0	0	0	0	0	0	0	0	0	0	0
MTHR_HUMAN	sp|P42898|MTHR_HUMAN Methylenetetrahydrofolate reductase OS=Homo sapiens OX=9606 GN=MTHFR PE=1 SV=3	5.22381	74549	F215851.dat	Q25537_MS19-036_T3_R9	29	1.1	1	1	1	2	0	0	0	0	0	0	0	0	0	0	0	0	0	0	0	0	0	0	0	0	0	0	0	0	0	0	0	0	0	0	0	0	0	0	0	0	0	0
HIPK4_HUMAN	sp|Q8NE63|HIPK4_HUMAN Homeodomain-interacting protein kinase 4 OS=Homo sapiens OX=9606 GN=HIPK4 PE=1 SV=1	6.1844	69381	F215721.dat	Q25484_MS19-036_T2_R14	29	1.5	1	1	1	1	0	0	0	0	0	0	0	0	0	0	0	0	0	0	0	0	0	0	0	1	0	0	0	0	0	0	0	0	0	0	0	0	0	0	0	0	0	0
GANC_HUMAN	sp|Q8TET4|GANC_HUMAN Neutral alpha-glucosidase C OS=Homo sapiens OX=9606 GN=GANC PE=2 SV=3	5.81559	104268	F215837.dat	Q25523_MS19-036_T4_NR14	29	0.8	1	1	1	23	0	1	0	0	0	0	0	0	0	0	0	0	0	0	0	0	1	0	0	0	0	0	1	0	1	0	0	1	0	1	1	0	0	0	0	1	0	0
TTBK1_HUMAN	sp|Q5TCY1|TTBK1_HUMAN Tau-tubulin kinase 1 OS=Homo sapiens OX=9606 GN=TTBK1 PE=1 SV=2	5.46166	142650	F215904.dat	Q25560_MS19-036_T2_R8	29	0.5	1	1	1	21	0	0	0	0	0	0	0	0	0	0	0	0	0	0	0	0	0	0	0	0	0	0	0	0	0	0	0	0	1	0	0	0	0	0	1	0	0	0
OPTN_HUMAN	sp|Q96CV9|OPTN_HUMAN Optineurin OS=Homo sapiens OX=9606 GN=OPTN PE=1 SV=3	5.12475	65881	F215977.dat	Q25579_MS19-036_T1(Baseline)_R12	29	1.2	1	1	1	0	0	0	0	0	0	0	0	0	0	0	0	0	0	0	0	0	0	0	0	0	0	0	0	0	0	0	0	0	0	0	0	0	0	0	0	0	0	0
TDG_HUMAN	sp|Q13569|TDG_HUMAN G/T mismatch-specific thymine DNA glycosylase OS=Homo sapiens OX=9606 GN=TDG PE=1 SV=2	6.3558	46024	F215902.dat	Q25559_MS19-036_T4_NR7	29	2.2	1	1	1	5	0	0	0	0	0	0	1	0	0	0	0	0	0	0	0	0	0	0	0	1	0	0	0	1	0	0	0	0	0	0	0	0	0	0	0	0	0	0
MYO1A_HUMAN	sp|Q9UBC5|MYO1A_HUMAN Unconventional myosin-Ia OS=Homo sapiens OX=9606 GN=MYO1A PE=1 SV=1	9.36587	118326	F215783.dat	Q25494_MS19-036_T1(Baseline)_R13	29	0.7	1	1	1	2	0	0	0	0	0	0	0	0	0	0	0	0	0	0	0	0	0	0	0	0	0	0	0	0	0	0	0	0	1	0	0	0	0	0	0	0	0	0
FUBP1_HUMAN	sp|Q96AE4|FUBP1_HUMAN Far upstream element-binding protein 1 OS=Homo sapiens OX=9606 GN=FUBP1 PE=1 SV=3	7.18047	67518	F215829.dat	Q25515_MS19-036_T2_R16	29	1.1	1	1	1	12	0	0	1	0	1	0	0	0	0	0	1	0	0	0	0	0	0	1	1	1	0	0	0	0	0	0	0	1	0	0	0	0	0	0	0	1	0	0
URFB1_HUMAN	sp|Q6BDS2|URFB1_HUMAN UHRF1-binding protein 1 OS=Homo sapiens OX=9606 GN=UHRF1BP1 PE=1 SV=1	5.75451	159385	F215685.dat	Q25477_MS19-036_T4_NR18	29	0.5	1	1	1	60	0	0	0	0	0	0	0	1	1	0	0	0	2	0	1	4	0	0	0	0	0	0	3	1	0	0	0	0	0	0	0	0	0	0	0	0	0	1
SLIT1_HUMAN	sp|O75093|SLIT1_HUMAN Slit homolog 1 protein OS=Homo sapiens OX=9606 GN=SLIT1 PE=2 SV=4	6.14162	167816	F215885.dat	Q25550_MS19-036_T3_NR4	28	0.5	1	1	1	7	0	0	0	0	0	0	0	0	0	0	0	0	0	0	0	0	0	0	1	0	0	0	2	0	0	0	0	0	0	0	0	0	0	0	0	0	0	0
I2BP1_HUMAN	sp|Q8IU81|I2BP1_HUMAN Interferon regulatory factor 2-binding protein 1 OS=Homo sapiens OX=9606 GN=IRF2BP1 PE=1 SV=1	8.52137	61649	F215923.dat	Q25566_MS19-036_T2_NR16	28	1.2	1	1	1	1	0	0	0	0	0	0	0	0	0	0	0	0	0	0	0	0	0	0	0	0	0	0	0	0	0	0	0	0	0	0	0	0	0	0	0	0	0	0
FBX41_HUMAN	sp|Q8TF61|FBX41_HUMAN F-box only protein 41 OS=Homo sapiens OX=9606 GN=FBXO41 PE=2 SV=5	8.6031	94437	F215923.dat	Q25566_MS19-036_T2_NR16	28	0.8	1	1	1	3	0	0	0	0	0	0	0	0	0	0	0	0	0	0	0	0	0	0	0	0	0	0	0	0	0	0	0	1	0	0	0	0	0	0	0	0	0	0
ACAP1_HUMAN	sp|Q15027|ACAP1_HUMAN Arf-GAP with coiled-coil, ANK repeat and PH domain-containing protein 1 OS=Homo sapiens OX=9606 GN=ACAP1 PE=1 SV=1	7.60167	81485	F215791.dat	Q25495_MS19-036_T4_NR16	28	1.4	1	1	1	3	0	0	0	0	0	0	0	0	0	0	0	0	0	0	0	0	0	0	0	0	0	0	0	0	0	0	0	1	0	1	0	0	0	0	0	0	0	0
PMFBP_HUMAN	sp|Q8TBY8|PMFBP_HUMAN Polyamine-modulated factor 1-binding protein 1 OS=Homo sapiens OX=9606 GN=PMFBP1 PE=1 SV=3	5.93858	117420	F215762.dat	Q25492_MS19-036_T3_R17	28	1	1	1	1	6	0	0	0	0	0	0	0	0	0	0	0	0	0	0	0	0	0	0	0	0	0	0	0	0	0	0	1	1	0	0	0	1	0	0	0	0	0	0
GBX1_HUMAN	sp|Q14549|GBX1_HUMAN Homeobox protein GBX-1 OS=Homo sapiens OX=9606 GN=GBX1 PE=1 SV=2	7.03627	37606	F215818.dat	Q25504_MS19-036_T1(Baseline)_NR10	28	1.9	1	1	1	10	0	0	0	0	0	0	0	0	0	0	0	0	0	0	0	0	0	0	0	0	0	0	0	0	0	1	0	0	0	0	0	0	0	0	0	0	0	1
LSM4_HUMAN	sp|Q9Y4Z0|LSM4_HUMAN U6 snRNA-associated Sm-like protein LSm4 OS=Homo sapiens OX=9606 GN=LSM4 PE=1 SV=1	10.0163	15340	F215844.dat	Q25530_MS19-036_T1(Baseline)_R15	28	5.8	1	1	1	61	0	0	1	0	0	0	1	1	0	0	1	0	0	0	1	1	0	0	0	1	0	0	0	0	0	0	0	0	2	0	2	2	0	0	0	1	0	1
PCDBG_HUMAN	sp|Q9NRJ7|PCDBG_HUMAN Protocadherin beta-16 OS=Homo sapiens OX=9606 GN=PCDHB16 PE=1 SV=3	5.00059	84931	F215839.dat	Q25525_MS19-036_T2_R13	28	0.9	1	1	1	2	0	0	0	0	0	0	0	0	0	0	0	0	0	0	0	0	0	0	0	0	0	0	0	0	0	0	0	0	0	0	0	0	0	0	0	0	0	0
G6PD_HUMAN	sp|P11413|G6PD_HUMAN Glucose-6-phosphate 1-dehydrogenase OS=Homo sapiens OX=9606 GN=G6PD PE=1 SV=4	6.38703	59219	F215846.dat	Q25532_MS19-036_T2_NR18	28	1.4	1	1	1	1	0	0	0	0	0	0	0	0	0	0	0	0	0	0	0	0	0	0	0	0	0	0	0	0	0	0	0	0	0	0	0	0	0	0	0	0	0	0
UAP1_HUMAN	sp|Q16222|UAP1_HUMAN UDP-N-acetylhexosamine pyrophosphorylase OS=Homo sapiens OX=9606 GN=UAP1 PE=1 SV=3	5.92207	58732	F215849.dat	Q25535_MS19-036_T2_R10	28	1.3	1	1	1	7	0	0	0	0	0	0	0	0	0	0	0	0	0	0	0	0	0	0	0	0	0	0	0	0	0	0	0	0	0	0	0	0	0	1	0	0	0	0
WEE1_HUMAN	sp|P30291|WEE1_HUMAN Wee1-like protein kinase OS=Homo sapiens OX=9606 GN=WEE1 PE=1 SV=2	6.32922	71553	F215849.dat	Q25535_MS19-036_T2_R10	28	1.1	1	1	1	7	0	0	0	0	0	0	0	0	0	0	0	0	0	0	0	0	0	0	0	0	0	0	0	0	0	0	0	0	0	0	0	0	0	1	0	0	0	0
FUBP2_HUMAN	sp|Q92945|FUBP2_HUMAN Far upstream element-binding protein 2 OS=Homo sapiens OX=9606 GN=KHSRP PE=1 SV=4	6.84632	73070	F215832.dat	Q25518_MS19-036_T3_R6	28	1.3	1	1	1	1	0	0	0	0	0	0	0	0	0	0	0	0	0	0	0	0	0	0	0	0	0	0	0	0	0	0	0	0	0	0	0	0	0	0	0	0	0	0
NADAP_HUMAN	sp|Q9BWU0|NADAP_HUMAN Kanadaptin OS=Homo sapiens OX=9606 GN=SLC4A1AP PE=1 SV=1	5.10655	88759	F215862.dat	Q25539_MS19-036_T1(Baseline)_R1	28	1	1	1	1	1	0	0	0	0	0	0	0	0	0	0	0	0	0	0	0	0	0	0	0	0	0	0	0	0	0	0	0	0	0	0	0	0	0	0	0	0	0	0
CEP83_HUMAN	sp|Q9Y592|CEP83_HUMAN Centrosomal protein of 83 kDa OS=Homo sapiens OX=9606 GN=CEP83 PE=1 SV=3	5.90183	82889	F215683.dat	Q25475_MS19-036_T3_R3	28	1.3	1	1	1	5	0	0	0	0	0	0	0	0	0	0	1	1	0	0	0	0	1	0	0	0	0	0	0	0	0	0	0	0	0	0	0	0	0	0	0	0	0	0
MIF_HUMAN	sp|P14174|MIF_HUMAN Macrophage migration inhibitory factor OS=Homo sapiens OX=9606 GN=MIF PE=1 SV=4	7.72819	12468	F215666.dat	Q25465_MS19-036_T2_NR17	28	7.8	1	1	1	1	1	0	0	0	0	0	0	0	0	0	0	0	0	0	0	0	0	0	0	0	0	0	0	0	0	0	0	0	0	0	0	0	0	0	0	0	0	0
GRP3_HUMAN	sp|Q8IV61|GRP3_HUMAN Ras guanyl-releasing protein 3 OS=Homo sapiens OX=9606 GN=RASGRP3 PE=1 SV=1	6.32666	78281	F215925.dat	Q25568_MS19-036_T4_NR6	28	1.2	1	1	1	2	0	0	0	0	0	0	0	0	0	0	0	0	0	0	0	0	0	0	0	0	0	0	0	0	0	0	0	0	0	0	0	0	0	0	0	0	0	0
PM34_HUMAN	sp|O43808|PM34_HUMAN Peroxisomal membrane protein PMP34 OS=Homo sapiens OX=9606 GN=SLC25A17 PE=1 SV=1	10.0863	34545	F215885.dat	Q25550_MS19-036_T3_NR4	28	2.3	1	1	1	4	0	0	0	0	0	0	0	0	0	0	0	0	0	0	0	0	0	0	0	0	0	1	0	0	0	0	0	0	0	0	0	0	0	0	0	0	0	0
SFPQ_HUMAN	sp|P23246|SFPQ_HUMAN Splicing factor, proline- and glutamine-rich OS=Homo sapiens OX=9606 GN=SFPQ PE=1 SV=2	9.45159	76102	F215666.dat	Q25465_MS19-036_T2_NR17	28	2.3	1	1	1	1	1	0	0	0	0	0	0	0	0	0	0	0	0	0	0	0	0	0	0	0	0	0	0	0	0	0	0	0	0	0	0	0	0	0	0	0	0	0
MA2A1_HUMAN	sp|Q16706|MA2A1_HUMAN Alpha-mannosidase 2 OS=Homo sapiens OX=9606 GN=MAN2A1 PE=1 SV=2	7.24365	131057	F215848.dat	Q25534_MS19-036_T3_R14	28	1.8	1	1	1	1	0	0	0	0	0	0	0	0	0	0	0	0	0	0	0	0	0	0	0	0	0	0	0	0	0	0	0	0	0	0	0	0	0	0	0	0	0	0
TVB76_HUMAN	sp|A0A1B0GX31|TVB76_HUMAN T cell receptor beta variable 7-6 OS=Homo sapiens OX=9606 GN=TRBV7-6 PE=3 SV=1	7.72333	12819	F215894.dat	Q25552_MS19-036_T3_NR5	28	6.1	1	1	1	7	0	0	1	0	0	0	0	0	0	0	0	0	0	0	0	0	0	0	0	0	0	0	0	0	0	0	0	0	0	0	0	0	0	0	0	0	0	0
UB2Q2_HUMAN	sp|Q8WVN8|UB2Q2_HUMAN Ubiquitin-conjugating enzyme E2 Q2 OS=Homo sapiens OX=9606 GN=UBE2Q2 PE=1 SV=1	4.86814	42791	F215673.dat	Q25472_MS19-036_T1(Baseline)_R5	28	4	1	1	1	8	0	0	0	0	0	0	0	1	1	0	0	0	0	0	0	0	0	0	0	0	0	0	0	0	0	0	0	0	1	0	0	0	0	0	0	0	0	0
ASH1L_HUMAN	sp|Q9NR48|ASH1L_HUMAN Histone-lysine N-methyltransferase ASH1L OS=Homo sapiens OX=9606 GN=ASH1L PE=1 SV=2	9.45696	332582	F215834.dat	Q25520_MS19-036_T2_R17	28	0.3	1	1	1	1	0	0	0	0	0	0	0	0	0	0	0	0	0	0	0	0	0	0	0	0	0	0	0	0	0	0	0	0	0	0	0	0	0	0	0	0	0	0
RS3_HUMAN	sp|P23396|RS3_HUMAN 40S ribosomal protein S3 OS=Homo sapiens OX=9606 GN=RPS3 PE=1 SV=2	9.68136	26671	F215817.dat	Q25503_MS19-036_T2_NR10	28	2.9	1	1	1	19	0	0	0	0	0	0	0	0	0	0	0	0	0	0	0	0	0	0	0	0	0	0	0	0	0	0	0	0	0	0	0	0	0	0	0	0	0	1
MYH14_HUMAN	sp|Q7Z406|MYH14_HUMAN Myosin-14 OS=Homo sapiens OX=9606 GN=MYH14 PE=1 SV=2	5.52326	227732	F215685.dat	Q25477_MS19-036_T4_NR18	28	0.4	1	1	1	0	0	0	0	0	0	0	0	0	0	0	0	0	0	0	0	0	0	0	0	0	0	0	0	0	0	0	0	0	0	0	0	0	0	0	0	0	0	0
SMRCD_HUMAN	sp|Q9H4L7|SMRCD_HUMAN SWI/SNF-related matrix-associated actin-dependent regulator of chromatin subfamily A containing DEAD/H box 1 OS=Homo sapiens OX=9606 GN=SMARCAD1 PE=1 SV=2	5.38611	117328	F215817.dat	Q25503_MS19-036_T2_NR10	28	0.7	1	1	1	2	0	0	0	0	0	0	0	0	0	0	0	0	0	0	0	0	0	0	0	1	0	0	0	0	0	0	0	0	0	0	0	0	0	0	0	0	0	1
F135A_HUMAN	sp|Q9P2D6|F135A_HUMAN Protein FAM135A OS=Homo sapiens OX=9606 GN=FAM135A PE=1 SV=2	5.21824	169732	F215845.dat	Q25531_MS19-036_T3_R10	28	0.9	1	1	1	4	0	0	0	0	0	0	0	0	0	0	0	0	0	0	0	0	0	0	0	0	0	0	0	0	0	0	0	0	0	0	0	0	0	0	0	0	0	0
SMCA5_HUMAN	sp|O60264|SMCA5_HUMAN SWI/SNF-related matrix-associated actin-dependent regulator of chromatin subfamily A member 5 OS=Homo sapiens OX=9606 GN=SMARCA5 PE=1 SV=1	8.27059	121828	F215877.dat	Q25547_MS19-036_T3_NR12	28	0.7	1	1	1	0	0	0	0	0	0	0	0	0	0	0	0	0	0	0	0	0	0	0	0	0	0	0	0	0	0	0	0	0	0	0	0	0	0	0	0	0	0	0
LGI1_HUMAN	sp|O95970|LGI1_HUMAN Leucine-rich glioma-inactivated protein 1 OS=Homo sapiens OX=9606 GN=LGI1 PE=1 SV=1	8.50087	63777	F215847.dat	Q25533_MS19-036_T2_R18	28	1.8	1	1	1	1	0	0	0	0	0	0	0	0	0	0	0	0	0	0	0	0	0	0	0	0	0	0	0	0	0	0	0	0	0	0	0	0	0	0	0	0	0	0
ULK2_HUMAN	sp|Q8IYT8|ULK2_HUMAN Serine/threonine-protein kinase ULK2 OS=Homo sapiens OX=9606 GN=ULK2 PE=1 SV=3	8.84417	112622	F215822.dat	Q25508_MS19-036_T2_NR7	28	0.7	1	1	1	100	1	0	2	0	1	0	2	1	1	0	0	1	2	0	1	0	1	1	0	1	2	0	1	0	0	1	0	2	1	1	2	0	1	1	0	2	1	1
RTKN2_HUMAN	sp|Q8IZC4|RTKN2_HUMAN Rhotekin-2 OS=Homo sapiens OX=9606 GN=RTKN2 PE=2 SV=1	8.02891	69259	F215846.dat	Q25532_MS19-036_T2_NR18	28	1.1	1	1	1	1	0	0	0	0	0	0	0	0	0	0	0	0	0	0	0	0	0	0	0	0	0	0	0	0	0	0	0	0	0	0	0	0	0	0	0	0	0	0
BAKOR_HUMAN	sp|Q6ZNE5|BAKOR_HUMAN Beclin 1-associated autophagy-related key regulator OS=Homo sapiens OX=9606 GN=ATG14 PE=1 SV=1	6.59017	55275	F215822.dat	Q25508_MS19-036_T2_NR7	28	1.6	1	1	1	2	0	0	0	0	0	0	0	0	0	0	0	0	0	0	0	0	0	0	0	0	0	0	0	0	0	0	0	0	0	0	0	0	0	0	0	0	0	0
DYTN_HUMAN	sp|A2CJ06|DYTN_HUMAN Dystrotelin OS=Homo sapiens OX=9606 GN=DYTN PE=2 SV=1	9.18415	65279	F215868.dat	Q25541_MS19-036_T1(Baseline)_NR3	28	1.2	1	1	1	4	0	0	0	0	0	0	0	0	0	0	0	0	0	0	0	0	0	0	0	0	0	0	0	0	0	0	1	0	0	0	0	0	0	0	0	0	0	0
CSR2B_HUMAN	sp|Q9H8E8|CSR2B_HUMAN Cysteine-rich protein 2-binding protein OS=Homo sapiens OX=9606 GN=KAT14 PE=1 SV=3	6.14116	88788	F215822.dat	Q25508_MS19-036_T2_NR7	28	1	1	1	1	39	0	0	0	0	1	0	0	0	0	0	0	0	0	0	0	1	1	0	0	0	0	0	0	1	1	1	1	1	1	0	1	0	0	0	0	1	1	0
F186B_HUMAN	sp|Q8IYM0|F186B_HUMAN Protein FAM186B OS=Homo sapiens OX=9606 GN=FAM186B PE=2 SV=2	9.08468	103657	F215906.dat	Q25561_MS19-036_T4_NR2	28	0.8	1	1	1	118	0	0	0	0	0	0	0	0	0	0	0	0	0	0	0	0	0	0	0	0	2	1	0	0	0	2	0	0	2	0	0	0	0	0	0	1	0	0
ATPA_HUMAN	sp|P25705|ATPA_HUMAN ATP synthase subunit alpha, mitochondrial OS=Homo sapiens OX=9606 GN=ATP5F1A PE=1 SV=1	9.15737	59714	F215956.dat	Q25573_MS19-036_T3_NR17	28	1.3	1	1	1	11	0	0	0	0	0	0	0	0	0	0	0	0	0	0	0	0	0	0	0	0	0	0	0	0	0	0	0	0	0	0	0	0	0	0	0	0	0	0
UXS1_HUMAN	sp|Q8NBZ7|UXS1_HUMAN UDP-glucuronic acid decarboxylase 1 OS=Homo sapiens OX=9606 GN=UXS1 PE=1 SV=1	8.99042	47547	F215672.dat	Q25471_MS19-036_T3_R8	28	1.9	1	1	1	11	0	0	0	0	0	0	1	0	0	0	0	0	0	0	0	1	0	0	0	0	0	0	0	0	0	1	0	0	0	0	0	0	0	1	0	0	0	0
CP046_HUMAN	sp|Q6P387|CP046_HUMAN Uncharacterized protein C16orf46 OS=Homo sapiens OX=9606 GN=C16orf46 PE=2 SV=2	8.79009	43390	F215924.dat	Q25567_MS19-036_T4_R14	28	2.5	1	1	1	11	0	0	0	0	0	0	0	0	0	0	0	0	0	0	0	0	0	0	0	0	0	0	0	0	0	0	0	0	0	0	0	0	0	0	0	0	0	0
KMT2D_HUMAN	sp|O14686|KMT2D_HUMAN Histone-lysine N-methyltransferase 2D OS=Homo sapiens OX=9606 GN=KMT2D PE=1 SV=2	5.40329	593017	F215686.dat	Q25478_MS19-036_T3_NR2	28	0.1	1	1	1	1	0	0	0	0	0	0	0	0	0	0	0	0	0	1	0	0	0	0	0	0	0	0	0	0	0	0	0	0	0	0	0	0	0	0	0	0	0	0
CD109_HUMAN	sp|Q6YHK3|CD109_HUMAN CD109 antigen OS=Homo sapiens OX=9606 GN=CD109 PE=1 SV=2	5.58562	161587	F215895.dat	Q25553_MS19-036_T3_NR16	28	1.2	1	1	1	2	0	0	0	0	0	0	0	0	0	0	0	0	0	0	0	0	0	0	0	0	0	0	0	0	0	0	0	0	0	0	0	0	0	0	0	0	0	0
STX19_HUMAN	sp|Q8N4C7|STX19_HUMAN Syntaxin-19 OS=Homo sapiens OX=9606 GN=STX19 PE=1 SV=1	7.04618	34303	F215972.dat	Q25576_MS19-036_T4_R13	28	2.4	1	1	1	36	0	0	0	0	1	0	0	0	1	0	0	1	1	0	1	1	0	1	0	0	0	1	1	1	0	1	0	0	0	0	0	0	0	1	0	0	1	0
PRI1_HUMAN	sp|P49642|PRI1_HUMAN DNA primase small subunit OS=Homo sapiens OX=9606 GN=PRIM1 PE=1 SV=1	8.39465	49870	F215844.dat	Q25530_MS19-036_T1(Baseline)_R15	28	1.9	1	1	1	79	1	0	1	0	0	0	1	1	1	0	1	0	0	1	1	1	0	0	0	1	1	1	0	0	0	0	0	0	2	0	2	2	1	0	1	1	0	1
TTC25_HUMAN	sp|Q96NG3|TTC25_HUMAN Tetratricopeptide repeat protein 25 OS=Homo sapiens OX=9606 GN=TTC25 PE=1 SV=2	5.49116	76608	F215761.dat	Q25491_MS19-036_T2_R3	27	1	1	1	1	23	0	0	0	0	0	0	0	1	0	0	0	0	1	0	0	0	0	1	0	0	0	1	0	0	0	1	0	0	1	0	0	0	0	0	1	1	0	0
SPCS_HUMAN	sp|Q9HD40|SPCS_HUMAN O-phosphoseryl-tRNA(Sec) selenium transferase OS=Homo sapiens OX=9606 GN=SEPSECS PE=1 SV=2	8.31409	55690	F215833.dat	Q25519_MS19-036_T2_R7	27	1.6	1	1	1	1	0	0	0	0	0	0	0	0	0	0	0	0	0	0	0	0	0	0	0	0	0	0	0	0	0	0	0	0	0	0	0	0	0	0	0	0	0	0
SPTC2_HUMAN	sp|O15270|SPTC2_HUMAN Serine palmitoyltransferase 2 OS=Homo sapiens OX=9606 GN=SPTLC2 PE=1 SV=1	7.88568	62884	F215874.dat	Q25544_MS19-036_T4_NR8	27	1.2	1	1	1	1	0	0	0	0	0	0	0	0	0	0	0	0	0	0	0	0	0	0	0	0	0	0	0	0	0	0	0	0	0	0	0	0	0	0	0	0	0	0
LRFN4_HUMAN	sp|Q6PJG9|LRFN4_HUMAN Leucine-rich repeat and fibronectin type-III domain-containing protein 4 OS=Homo sapiens OX=9606 GN=LRFN4 PE=1 SV=1	6.44219	66818	F215843.dat	Q25529_MS19-036_T1(Baseline)_NR4	27	1.9	1	1	1	1	0	0	0	0	0	0	0	0	0	0	0	0	0	0	0	0	0	0	0	0	0	0	0	0	0	0	0	0	0	0	0	0	0	0	0	0	0	0
KI2S3_HUMAN	sp|Q14952|KI2S3_HUMAN Killer cell immunoglobulin-like receptor 2DS3 OS=Homo sapiens OX=9606 GN=KIR2DS3 PE=2 SV=1	6.09674	33695	F215847.dat	Q25533_MS19-036_T2_R18	27	2.3	1	1	1	7	0	0	0	0	0	0	0	0	0	0	0	0	0	0	0	0	0	0	0	0	0	0	0	0	0	0	0	0	0	0	0	0	0	0	0	0	0	0
AT11A_HUMAN	sp|P98196|AT11A_HUMAN Probable phospholipid-transporting ATPase IH OS=Homo sapiens OX=9606 GN=ATP11A PE=1 SV=3	6.17229	129672	F215820.dat	Q25506_MS19-036_T4_R4	27	0.6	1	1	1	4	0	0	1	0	0	0	0	0	0	0	0	0	0	0	0	0	0	0	0	0	0	0	0	0	0	0	0	0	0	0	0	0	0	0	0	0	0	0
MPIP1_HUMAN	sp|P30304|MPIP1_HUMAN M-phase inducer phosphatase 1 OS=Homo sapiens OX=9606 GN=CDC25A PE=1 SV=2	6.49054	59049	F215906.dat	Q25561_MS19-036_T4_NR2	27	2.5	1	1	1	1	0	0	0	0	0	0	0	0	0	0	0	0	0	0	0	0	0	0	0	0	0	0	0	0	0	0	0	0	0	0	0	0	0	0	0	0	0	0
INAVA_HUMAN	sp|Q3KP66|INAVA_HUMAN Innate immunity activator protein OS=Homo sapiens OX=9606 GN=INAVA PE=1 SV=2	9.41535	72869	F215838.dat	Q25524_MS19-036_T4_R3	27	1.1	1	1	1	1	0	0	0	0	0	0	0	0	0	0	0	0	0	0	0	0	0	0	0	0	0	0	0	0	0	0	0	0	0	0	0	0	0	0	0	0	0	0
NELFB_HUMAN	sp|Q8WX92|NELFB_HUMAN Negative elongation factor B OS=Homo sapiens OX=9606 GN=NELFB PE=1 SV=1	5.76944	65655	F215689.dat	Q25481_MS19-036_T2_NR13	27	1.2	1	1	1	2	0	0	0	0	0	0	0	0	0	0	0	0	0	0	0	0	1	0	0	0	0	0	0	0	0	0	0	0	0	0	0	0	0	0	0	0	0	0
AHSA1_HUMAN	sp|O95433|AHSA1_HUMAN Activator of 90 kDa heat shock protein ATPase homolog 1 OS=Homo sapiens OX=9606 GN=AHSA1 PE=1 SV=1	5.4061	38250	F215888.dat	Q25551_MS19-036_T4_R5	27	2.1	1	1	1	4	0	0	0	0	0	0	0	0	0	0	0	0	0	0	0	0	0	0	0	0	0	0	1	0	0	0	0	0	0	0	0	0	0	0	0	0	0	0
ITPI2_HUMAN	sp|P28290|ITPI2_HUMAN Protein ITPRID2 OS=Homo sapiens OX=9606 GN=ITPRID2 PE=1 SV=3	5.10681	138300	F215836.dat	Q25522_MS19-036_T2_R5	27	0.7	1	1	1	6	0	0	0	0	0	0	0	0	0	0	0	0	0	0	0	0	0	0	0	0	0	0	0	0	0	1	0	1	0	0	0	0	0	0	0	0	0	0
CEP68_HUMAN	sp|Q76N32|CEP68_HUMAN Centrosomal protein of 68 kDa OS=Homo sapiens OX=9606 GN=CEP68 PE=1 SV=2	5.04358	81052	F215936.dat	Q25571_MS19-036_T1(Baseline)_NR5	27	1.7	1	1	1	10	0	0	0	0	0	0	0	0	0	0	0	0	0	0	0	0	0	0	0	0	0	0	0	0	1	0	0	0	0	0	0	0	0	0	0	0	0	1
SOCS6_HUMAN	sp|O14544|SOCS6_HUMAN Suppressor of cytokine signaling 6 OS=Homo sapiens OX=9606 GN=SOCS6 PE=1 SV=2	6.79346	59491	F215845.dat	Q25531_MS19-036_T3_R10	27	1.5	1	1	1	14	0	0	0	0	0	0	0	0	0	0	0	1	0	0	0	0	0	0	0	0	0	0	0	0	0	0	0	1	0	0	0	1	0	0	0	2	0	0
I17RA_HUMAN	sp|Q96F46|I17RA_HUMAN Interleukin-17 receptor A OS=Homo sapiens OX=9606 GN=IL17RA PE=1 SV=2	5.05922	96061	F215985.dat	Q25585_MS19-036_T3_NR9	27	0.8	1	1	1	1	0	0	0	0	0	0	0	0	0	0	0	0	0	0	0	0	0	0	0	0	0	0	0	0	0	0	0	0	0	0	0	0	0	0	0	0	0	0
WWP2_HUMAN	sp|O00308|WWP2_HUMAN NEDD4-like E3 ubiquitin-protein ligase WWP2 OS=Homo sapiens OX=9606 GN=WWP2 PE=1 SV=2	6.66966	98850	F215777.dat	Q25493_MS19-036_T1(Baseline)_NR11	27	0.8	1	1	1	1	0	0	0	0	0	0	0	0	0	0	0	0	0	0	0	0	0	0	0	0	0	0	0	0	0	0	0	1	0	0	0	0	0	0	0	0	0	0
ANGL7_HUMAN	sp|O43827|ANGL7_HUMAN Angiopoietin-related protein 7 OS=Homo sapiens OX=9606 GN=ANGPTL7 PE=1 SV=1	7.97989	39993	F215757.dat	Q25487_MS19-036_T1(Baseline)_R11	27	2	1	1	1	3	0	0	0	0	0	0	0	0	0	0	0	0	0	0	0	0	0	0	0	0	0	1	1	0	0	0	0	0	0	0	0	0	0	0	0	0	0	0
PRS7_HUMAN	sp|P35998|PRS7_HUMAN 26S proteasome regulatory subunit 7 OS=Homo sapiens OX=9606 GN=PSMC2 PE=1 SV=3	5.713	48603	F215900.dat	Q25558_MS19-036_T3_R4	27	2.1	1	1	1	3	0	0	0	0	0	0	0	0	0	0	0	0	0	0	0	0	0	0	0	0	0	0	0	0	0	0	0	0	0	0	0	0	0	0	0	0	0	0
ZN718_HUMAN	sp|Q3SXZ3|ZN718_HUMAN Zinc finger protein 718 OS=Homo sapiens OX=9606 GN=ZNF718 PE=2 SV=2	9.52607	55324	F215777.dat	Q25493_MS19-036_T1(Baseline)_NR11	27	1.5	1	1	1	4	0	0	0	0	0	0	0	0	0	0	0	0	0	0	0	0	0	0	0	0	0	0	0	0	0	0	0	1	0	0	0	0	0	0	0	0	0	0
TRPS1_HUMAN	sp|Q9UHF7|TRPS1_HUMAN Zinc finger transcription factor Trps1 OS=Homo sapiens OX=9606 GN=TRPS1 PE=1 SV=2	7.52781	141432	F215836.dat	Q25522_MS19-036_T2_R5	27	0.9	1	1	1	1	0	0	0	0	0	0	0	0	0	0	0	0	0	0	0	0	0	0	0	0	0	0	0	0	0	0	0	0	0	0	0	0	0	0	0	0	0	0
ADEC1_HUMAN	sp|O15204|ADEC1_HUMAN ADAM DEC1 OS=Homo sapiens OX=9606 GN=ADAMDEC1 PE=1 SV=2	7.01142	52742	F215894.dat	Q25552_MS19-036_T3_NR5	27	1.5	1	1	1	8	0	0	0	0	0	0	0	0	0	0	0	0	0	0	0	0	0	0	0	0	0	0	1	0	0	0	0	0	0	0	0	0	0	0	0	0	0	0
LRC49_HUMAN	sp|Q8IUZ0|LRC49_HUMAN Leucine-rich repeat-containing protein 49 OS=Homo sapiens OX=9606 GN=LRRC49 PE=2 SV=2	7.94257	78845	F215721.dat	Q25484_MS19-036_T2_R14	27	1.2	1	1	1	4	0	0	1	0	0	0	0	0	0	0	0	0	0	1	0	0	0	0	0	1	0	0	0	0	0	0	0	0	0	0	0	0	0	0	0	0	0	0
MTUS2_HUMAN	sp|Q5JR59|MTUS2_HUMAN Microtubule-associated tumor suppressor candidate 2 OS=Homo sapiens OX=9606 GN=MTUS2 PE=1 SV=3	6.23256	150103	F215818.dat	Q25504_MS19-036_T1(Baseline)_NR10	27	0.7	1	1	1	4	0	0	0	0	0	0	0	0	0	0	0	0	0	0	0	0	0	0	0	0	0	0	0	0	0	0	0	0	0	0	0	0	0	0	0	0	0	0
SNX17_HUMAN	sp|Q15036|SNX17_HUMAN Sorting nexin-17 OS=Homo sapiens OX=9606 GN=SNX17 PE=1 SV=1	7.06699	52868	F215821.dat	Q25507_MS19-036_T3_NR1	26	1.5	1	1	1	12	0	0	1	1	0	0	0	0	0	0	1	0	0	0	0	0	0	0	0	0	0	0	0	0	1	0	0	0	0	0	1	0	0	0	0	0	0	0
DOCK8_HUMAN	sp|Q8NF50|DOCK8_HUMAN Dedicator of cytokinesis protein 8 OS=Homo sapiens OX=9606 GN=DOCK8 PE=1 SV=3	6.43426	238377	F215849.dat	Q25535_MS19-036_T2_R10	26	0.4	1	1	1	1	0	0	0	0	0	0	0	0	0	0	0	0	0	0	0	0	0	0	0	0	0	0	0	0	0	0	0	0	0	0	0	0	0	0	0	0	0	0
PTPRU_HUMAN	sp|Q92729|PTPRU_HUMAN Receptor-type tyrosine-protein phosphatase U OS=Homo sapiens OX=9606 GN=PTPRU PE=1 SV=2	6.46084	162320	F215969.dat	Q25575_MS19-036_T4_R2	26	0.8	1	1	1	3	0	0	0	0	0	0	0	0	0	0	0	0	0	0	0	0	0	0	0	0	0	0	0	0	0	0	0	0	0	0	0	0	0	0	0	0	0	0
SYFM_HUMAN	sp|O95363|SYFM_HUMAN Phenylalanine--tRNA ligase, mitochondrial OS=Homo sapiens OX=9606 GN=FARS2 PE=1 SV=1	6.992	52324	F215975.dat	Q25578_MS19-036_T3_NR14	26	1.6	1	1	1	2	0	0	0	0	0	0	0	0	0	0	0	0	0	0	0	0	0	0	0	0	0	0	0	0	0	0	0	0	0	0	0	0	0	0	0	0	0	0
CC138_HUMAN	sp|Q96M89|CC138_HUMAN Coiled-coil domain-containing protein 138 OS=Homo sapiens OX=9606 GN=CCDC138 PE=1 SV=1	8.75272	76171	F215872.dat	Q25542_MS19-036_T3_NR7	26	1.7	1	1	1	16	0	0	0	0	0	0	0	0	0	0	0	0	0	0	0	0	0	0	0	0	0	1	0	0	0	0	0	0	0	0	0	0	0	0	0	0	1	0
KIF17_HUMAN	sp|Q9P2E2|KIF17_HUMAN Kinesin-like protein KIF17 OS=Homo sapiens OX=9606 GN=KIF17 PE=2 SV=3	5.37998	114997	F215829.dat	Q25515_MS19-036_T2_R16	26	0.7	1	1	1	3	0	0	0	0	0	0	0	0	0	0	0	0	0	0	0	0	0	0	0	0	0	0	0	0	0	0	0	0	0	0	0	0	0	0	0	0	0	0
GNB1L_HUMAN	sp|Q9BYB4|GNB1L_HUMAN Guanine nucleotide-binding protein subunit beta-like protein 1 OS=Homo sapiens OX=9606 GN=GNB1L PE=1 SV=2	8.26829	35595	F215836.dat	Q25522_MS19-036_T2_R5	26	3.1	1	1	1	1	0	0	0	0	0	0	0	0	0	0	0	0	0	0	0	0	0	0	0	0	0	0	0	0	0	0	0	0	0	0	0	0	0	0	0	0	0	0
CE290_HUMAN	sp|O15078|CE290_HUMAN Centrosomal protein of 290 kDa OS=Homo sapiens OX=9606 GN=CEP290 PE=1 SV=2	5.74925	290207	F215877.dat	Q25547_MS19-036_T3_NR12	26	0.7	1	1	1	3	0	0	0	0	0	0	0	0	0	0	0	0	0	0	0	0	0	0	0	0	0	0	0	0	0	0	0	0	0	0	0	0	0	0	0	0	0	0
NIN_HUMAN	sp|Q8N4C6|NIN_HUMAN Ninein OS=Homo sapiens OX=9606 GN=NIN PE=1 SV=4	4.99082	243098	F215840.dat	Q25526_MS19-036_T1(Baseline)_NR15	26	0.3	1	1	1	176	0	0	3	2	0	0	2	0	3	0	2	0	3	0	0	3	3	0	0	0	0	0	3	4	0	3	0	0	0	3	3	2	3	0	0	0	3	0
TFPI1_HUMAN	sp|P10646|TFPI1_HUMAN Tissue factor pathway inhibitor OS=Homo sapiens OX=9606 GN=TFPI PE=1 SV=1	8.61333	34992	F215828.dat	Q25514_MS19-036_T4_R9	26	6.9	1	1	1	1	0	0	0	0	0	0	0	0	0	0	0	0	0	0	0	0	0	0	0	0	0	0	0	0	0	0	0	0	0	0	0	0	0	0	0	0	0	0
E2F8_HUMAN	sp|A0AVK6|E2F8_HUMAN Transcription factor E2F8 OS=Homo sapiens OX=9606 GN=E2F8 PE=1 SV=1	9.10972	94107	F215820.dat	Q25506_MS19-036_T4_R4	26	0.8	1	1	1	1	0	0	0	0	0	0	0	0	0	0	0	0	0	0	0	0	0	0	0	0	0	0	0	0	0	0	0	0	0	0	0	0	0	0	0	0	0	0
CGNL1_HUMAN	sp|Q0VF96|CGNL1_HUMAN Cingulin-like protein 1 OS=Homo sapiens OX=9606 GN=CGNL1 PE=1 SV=2	5.51482	148989	F215846.dat	Q25532_MS19-036_T2_NR18	26	0.5	1	1	1	2	0	1	0	0	0	0	0	0	0	0	0	0	0	0	0	0	0	0	0	0	0	0	0	0	0	0	0	0	0	0	0	0	0	0	0	0	0	0
PQBP1_HUMAN	sp|O60828|PQBP1_HUMAN Polyglutamine-binding protein 1 OS=Homo sapiens OX=9606 GN=PQBP1 PE=1 SV=1	5.92125	30454	F215821.dat	Q25507_MS19-036_T3_NR1	26	3.8	1	1	1	11	0	0	0	0	0	0	0	0	1	0	0	0	0	0	0	0	0	0	0	0	0	0	0	0	0	0	0	0	0	0	0	0	0	0	0	0	0	0
PCF11_HUMAN	sp|O94913|PCF11_HUMAN Pre-mRNA cleavage complex 2 protein Pcf11 OS=Homo sapiens OX=9606 GN=PCF11 PE=1 SV=3	8.6489	172944	F215936.dat	Q25571_MS19-036_T1(Baseline)_NR5	26	0.7	1	1	1	2	0	0	0	0	0	0	0	0	0	0	0	0	0	0	0	0	0	0	0	0	0	0	0	0	0	0	0	0	0	0	0	0	0	0	0	0	0	0
GBRA2_HUMAN	sp|P47869|GBRA2_HUMAN Gamma-aminobutyric acid receptor subunit alpha-2 OS=Homo sapiens OX=9606 GN=GABRA2 PE=2 SV=2	9.17163	51293	F215828.dat	Q25514_MS19-036_T4_R9	26	1.6	1	1	1	8	0	0	0	0	0	0	0	0	0	0	0	1	0	0	0	0	0	0	0	0	0	0	0	0	0	0	0	0	0	0	0	0	0	0	0	0	0	0
CNGB1_HUMAN	sp|Q14028|CNGB1_HUMAN Cyclic nucleotide-gated cation channel beta-1 OS=Homo sapiens OX=9606 GN=CNGB1 PE=1 SV=2	4.75931	139590	F216014.dat	Q25574_MS19-036_T3_NR6	26	1.1	1	1	1	2	0	0	0	0	0	0	0	0	0	0	0	0	0	0	0	0	0	0	0	0	0	0	0	1	0	0	0	0	0	0	0	0	0	0	0	0	0	0
LALBA_HUMAN	sp|P00709|LALBA_HUMAN Alpha-lactalbumin OS=Homo sapiens OX=9606 GN=LALBA PE=1 SV=1	4.82633	16214	F215812.dat	Q25500_MS19-036_T1(Baseline)_R2	26	5.6	1	1	1	14	0	0	0	0	0	0	0	0	0	0	0	0	0	0	0	0	0	0	0	0	0	0	0	0	0	0	0	0	0	0	0	0	0	0	1	1	0	1
RPA1_HUMAN	sp|O95602|RPA1_HUMAN DNA-directed RNA polymerase I subunit RPA1 OS=Homo sapiens OX=9606 GN=POLR1A PE=1 SV=2	6.61353	194687	F215980.dat	Q25581_MS19-036_T4_NR5	26	0.6	1	1	1	3	0	0	0	0	0	0	0	0	0	0	0	0	0	0	0	0	0	0	0	0	0	0	0	0	0	0	0	0	0	0	0	0	0	0	0	0	0	0
PYAS1_HUMAN	sp|I3L0S3|PYAS1_HUMAN Putative uncharacterized protein PYCARD-AS1 OS=Homo sapiens OX=9606 GN=PYCARD-AS1 PE=5 SV=1	11.3222	21935	F215845.dat	Q25531_MS19-036_T3_R10	26	3.4	1	1	1	119	2	0	1	1	1	1	1	1	1	0	1	2	2	2	1	1	1	1	0	0	1	1	1	1	1	1	0	2	1	1	1	2	1	1	1	1	1	1
TBC9B_HUMAN	sp|Q66K14|TBC9B_HUMAN TBC1 domain family member 9B OS=Homo sapiens OX=9606 GN=TBC1D9B PE=1 SV=3	5.14223	140436	F215894.dat	Q25552_MS19-036_T3_NR5	26	0.9	1	1	1	8	0	0	0	0	0	0	0	0	0	0	0	0	0	0	0	0	0	0	0	0	0	0	0	0	0	0	0	0	0	0	0	0	0	0	0	0	0	0
HIF3A_HUMAN	sp|Q9Y2N7|HIF3A_HUMAN Hypoxia-inducible factor 3-alpha OS=Homo sapiens OX=9606 GN=HIF3A PE=1 SV=2	5.66899	72387	F215850.dat	Q25536_MS19-036_T3_R15	26	1.3	1	1	1	1	0	0	0	0	0	0	0	0	0	0	0	0	0	0	0	0	0	0	0	0	0	0	0	0	0	0	0	0	0	0	0	0	0	0	0	0	0	0
NEDD4_HUMAN	sp|P46934|NEDD4_HUMAN E3 ubiquitin-protein ligase NEDD4 OS=Homo sapiens OX=9606 GN=NEDD4 PE=1 SV=4	6.14566	149022	F215850.dat	Q25536_MS19-036_T3_R15	26	0.7	1	1	1	1	0	0	0	0	0	0	0	0	0	0	0	0	0	0	0	0	0	0	0	0	0	0	0	0	0	0	0	0	0	0	0	0	0	0	0	0	0	0
GLRA3_HUMAN	sp|O75311|GLRA3_HUMAN Glycine receptor subunit alpha-3 OS=Homo sapiens OX=9606 GN=GLRA3 PE=1 SV=2	8.60469	53765	F215894.dat	Q25552_MS19-036_T3_NR5	26	2.4	1	1	1	1	0	0	0	0	0	0	0	0	0	0	0	0	0	0	0	0	0	0	0	0	0	0	0	0	0	0	0	0	0	0	0	0	0	0	0	0	0	0
ROA2_HUMAN	sp|P22626|ROA2_HUMAN Heterogeneous nuclear ribonucleoproteins A2/B1 OS=Homo sapiens OX=9606 GN=HNRNPA2B1 PE=1 SV=2	8.97161	37407	F215921.dat	Q25564_MS19-036_T4_R6	26	2	1	1	1	0	0	0	0	0	0	0	0	0	0	0	0	0	0	0	0	0	0	0	0	0	0	0	0	0	0	0	0	0	0	0	0	0	0	0	0	0	0	0
LTV1_HUMAN	sp|Q96GA3|LTV1_HUMAN Protein LTV1 homolog OS=Homo sapiens OX=9606 GN=LTV1 PE=1 SV=1	4.79908	54821	F215982.dat	Q25582_MS19-036_T2_NR8	26	1.5	1	1	1	7	0	0	0	0	0	0	0	0	0	0	0	0	0	1	0	0	0	0	0	0	0	0	0	0	0	0	0	0	0	0	0	0	0	0	0	0	0	0
RGS9_HUMAN	sp|O75916|RGS9_HUMAN Regulator of G-protein signaling 9 OS=Homo sapiens OX=9606 GN=RGS9 PE=1 SV=1	9.4244	76917	F215829.dat	Q25515_MS19-036_T2_R16	26	1	1	1	1	19	0	1	0	3	0	0	0	0	1	0	1	0	0	3	0	0	0	0	0	0	0	0	0	0	0	0	0	3	0	0	0	1	0	0	0	0	0	0
RN112_HUMAN	sp|Q9ULX5|RN112_HUMAN RING finger protein 112 OS=Homo sapiens OX=9606 GN=RNF112 PE=1 SV=2	8.87847	68254	F215840.dat	Q25526_MS19-036_T1(Baseline)_NR15	26	3.6	1	1	1	3	0	0	0	0	0	0	0	0	0	0	0	0	0	0	0	0	0	0	0	0	0	0	0	0	0	0	0	0	0	0	0	0	0	0	0	0	0	0
GOGA3_HUMAN	sp|Q08378|GOGA3_HUMAN Golgin subfamily A member 3 OS=Homo sapiens OX=9606 GN=GOLGA3 PE=1 SV=2	5.33668	167252	F215704.dat	Q25483_MS19-036_T4_R17	26	0.5	1	1	1	2	0	0	0	0	0	0	0	0	0	0	0	0	0	0	0	0	0	0	1	0	0	0	0	0	0	0	0	0	0	0	0	0	0	0	0	0	0	0
BANK1_HUMAN	sp|Q8NDB2|BANK1_HUMAN B-cell scaffold protein with ankyrin repeats OS=Homo sapiens OX=9606 GN=BANK1 PE=1 SV=3	5.27866	89225	F215833.dat	Q25519_MS19-036_T2_R7	26	1.3	1	1	1	1	0	0	0	0	0	0	0	0	0	0	0	0	0	0	0	0	0	0	0	0	0	0	0	0	0	0	0	0	0	0	0	0	0	0	0	0	0	0
ROA0_HUMAN	sp|Q13151|ROA0_HUMAN Heterogeneous nuclear ribonucleoprotein A0 OS=Homo sapiens OX=9606 GN=HNRNPA0 PE=1 SV=1	9.33929	30822	F215921.dat	Q25564_MS19-036_T4_R6	26	2.3	1	1	1	0	0	0	0	0	0	0	0	0	0	0	0	0	0	0	0	0	0	0	0	0	0	0	0	0	0	0	0	0	0	0	0	0	0	0	0	0	0	0
TPM1_HUMAN	sp|P09493|TPM1_HUMAN Tropomyosin alpha-1 chain OS=Homo sapiens OX=9606 GN=TPM1 PE=1 SV=2	4.68724	32689	F215666.dat	Q25465_MS19-036_T2_NR17	26	3.5	1	1	1	1	1	0	0	0	0	0	0	0	0	0	0	0	0	0	0	0	0	0	0	0	0	0	0	0	0	0	0	0	0	0	0	0	0	0	0	0	0	0
CALL6_HUMAN	sp|Q8TD86|CALL6_HUMAN Calmodulin-like protein 6 OS=Homo sapiens OX=9606 GN=CALML6 PE=2 SV=2	4.47219	20677	F215849.dat	Q25535_MS19-036_T2_R10	26	3.9	1	1	1	1	0	0	0	0	0	0	0	0	0	0	0	0	0	0	0	0	0	0	0	0	0	0	0	0	0	0	0	0	0	0	0	0	0	0	0	0	0	0
ZN653_HUMAN	sp|Q96CK0|ZN653_HUMAN Zinc finger protein 653 OS=Homo sapiens OX=9606 GN=ZNF653 PE=1 SV=1	6.52735	67192	F215885.dat	Q25550_MS19-036_T3_NR4	26	2.1	1	1	1	1	0	0	0	0	0	0	0	0	0	0	0	0	0	0	0	0	0	0	0	0	0	0	0	0	0	0	0	0	0	0	0	0	0	0	0	0	0	0
FUCO_HUMAN	Tissue alpha-L-fucosidase OS=Homo sapiens OX=9606 GN=FUCA1 PE=1 SV=4	6.36582	53655	F215978.dat	Q25580_MS19-036_T4_R16	26	2.4	1	1	1	1	0	0	0	0	0	0	0	0	0	0	0	0	0	0	0	0	0	0	0	0	0	0	0	0	0	0	0	0	0	0	0	0	0	0	0	0	0	0
RIMS4_HUMAN	sp|Q9H426|RIMS4_HUMAN Regulating synaptic membrane exocytosis protein 4 OS=Homo sapiens OX=9606 GN=RIMS4 PE=1 SV=3	5.65171	29311	F215815.dat	Q25502_MS19-036_T1(Baseline)_NR13	26	2.6	1	1	1	86	0	0	0	0	2	0	0	1	1	0	0	1	1	0	1	1	1	1	0	1	0	1	0	1	0	1	1	1	1	1	1	1	1	0	1	1	1	1
IFT74_HUMAN	sp|Q96LB3|IFT74_HUMAN Intraflagellar transport protein 74 homolog OS=Homo sapiens OX=9606 GN=IFT74 PE=1 SV=1	5.73202	69196	F215687.dat	Q25479_MS19-036_T1(Baseline)_NR9	26	1.7	1	1	1	6	1	0	1	1	0	0	0	0	0	0	0	0	0	0	1	0	0	0	0	0	0	0	0	0	0	0	0	0	0	0	0	0	0	0	0	0	0	0
H10_HUMAN	sp|P07305|H10_HUMAN Histone H1.0 OS=Homo sapiens OX=9606 GN=H1F0 PE=1 SV=3	10.844	20850	F215921.dat	Q25564_MS19-036_T4_R6	26	4.1	1	1	1	1	0	0	0	0	0	0	0	0	0	0	0	0	0	0	0	0	0	0	0	0	0	0	0	0	0	0	0	0	0	0	0	0	0	0	0	0	0	0
DSC1_HUMAN	sp|Q08554|DSC1_HUMAN Desmocollin-1 OS=Homo sapiens OX=9606 GN=DSC1 PE=1 SV=2	5.24866	99924	F215838.dat	Q25524_MS19-036_T4_R3	26	1.6	1	1	1	3	0	0	0	0	0	0	0	0	0	0	0	0	0	0	0	0	1	0	0	0	0	0	0	0	0	0	0	0	0	0	0	0	0	0	0	0	0	0
VPS72_HUMAN	sp|Q15906|VPS72_HUMAN Vacuolar protein sorting-associated protein 72 homolog OS=Homo sapiens OX=9606 GN=VPS72 PE=1 SV=1	6.09234	40570	F215975.dat	Q25578_MS19-036_T3_NR14	26	2.2	1	1	1	1	0	0	0	0	0	0	0	0	0	0	0	0	0	0	0	0	0	0	0	0	0	0	0	0	0	0	0	0	0	0	0	0	0	0	0	0	0	0
SHPRH_HUMAN	sp|Q149N8|SHPRH_HUMAN E3 ubiquitin-protein ligase SHPRH OS=Homo sapiens OX=9606 GN=SHPRH PE=1 SV=2	7.3032	192957	F215878.dat	Q25548_MS19-036_T4_NR9	26	0.5	1	1	1	2	0	0	0	0	0	0	0	0	0	0	0	0	0	0	0	0	0	0	0	0	0	0	0	0	0	0	0	0	0	0	0	0	0	0	0	0	0	0
EPHAA_HUMAN	sp|Q5JZY3|EPHAA_HUMAN Ephrin type-A receptor 10 OS=Homo sapiens OX=9606 GN=EPHA10 PE=1 SV=2	6.52101	109646	F215899.dat	Q25557_MS19-036_T3_NR15	26	0.9	1	1	1	9	0	0	0	0	0	0	0	0	0	0	0	0	0	0	0	0	0	0	0	0	0	0	0	0	0	0	0	0	0	0	0	0	0	0	0	0	0	0
E2F5_HUMAN	sp|Q15329|E2F5_HUMAN Transcription factor E2F5 OS=Homo sapiens OX=9606 GN=E2F5 PE=1 SV=1	4.93976	37587	F215668.dat	Q25467_MS19-036_T4_R18	26	2	1	1	1	6	1	0	1	0	0	0	0	0	0	0	0	1	0	0	0	0	0	0	0	0	0	0	0	0	0	0	0	0	0	0	0	0	0	0	0	0	0	0
ST1E1_HUMAN	sp|P49888|ST1E1_HUMAN Estrogen sulfotransferase OS=Homo sapiens OX=9606 GN=SULT1E1 PE=1 SV=1	6.17817	35104	F215687.dat	Q25479_MS19-036_T1(Baseline)_NR9	26	3.1	1	1	1	4	1	0	0	1	0	0	0	0	0	0	0	0	0	0	1	0	0	0	0	0	0	0	0	0	0	0	0	0	0	0	0	0	0	0	0	0	0	0
HDAC5_HUMAN	sp|Q9UQL6|HDAC5_HUMAN Histone deacetylase 5 OS=Homo sapiens OX=9606 GN=HDAC5 PE=1 SV=2	5.8343	121902	F215704.dat	Q25483_MS19-036_T4_R17	26	0.6	1	1	1	2	0	0	0	0	0	0	0	0	0	0	0	0	0	0	0	0	0	0	1	0	0	0	0	0	0	0	0	0	0	0	0	0	0	0	0	0	0	0
ABCB7_HUMAN	sp|O75027|ABCB7_HUMAN ATP-binding cassette sub-family B member 7, mitochondrial OS=Homo sapiens OX=9606 GN=ABCB7 PE=1 SV=2	9.37277	82589	F215675.dat	Q25474_MS19-036_T1(Baseline)_R9	26	0.9	1	1	1	1	0	0	0	0	0	0	0	0	0	1	0	0	0	0	0	0	0	0	0	0	0	0	0	0	0	0	0	0	0	0	0	0	0	0	0	0	0	0
PLXB2_HUMAN	sp|O15031|PLXB2_HUMAN Plexin-B2 OS=Homo sapiens OX=9606 GN=PLXNB2 PE=1 SV=3	5.85056	204997	F215926.dat	Q25569_MS19-036_T4_NR10	26	0.4	1	1	1	1	0	0	0	0	0	0	0	0	0	0	0	0	0	0	0	0	0	0	0	0	0	0	0	0	0	0	0	0	0	0	0	0	0	0	0	0	0	0
MAP9_HUMAN	sp|Q49MG5|MAP9_HUMAN Microtubule-associated protein 9 OS=Homo sapiens OX=9606 GN=MAP9 PE=1 SV=3	7.58629	74189	F215838.dat	Q25524_MS19-036_T4_R3	26	1.2	1	1	1	1	0	0	0	0	0	0	0	0	0	0	0	0	0	0	0	0	0	0	0	0	0	0	0	0	0	0	0	0	0	0	0	0	0	0	0	0	0	0
PEO1_HUMAN	sp|Q96RR1|PEO1_HUMAN Twinkle protein, mitochondrial OS=Homo sapiens OX=9606 GN=TWNK PE=1 SV=1	9.12705	77106	F215828.dat	Q25514_MS19-036_T4_R9	26	1.2	1	1	1	1	0	0	0	0	0	0	0	0	0	0	0	0	0	0	0	0	0	0	0	0	0	0	0	0	0	0	0	0	0	0	0	0	0	0	0	0	0	0
ZN197_HUMAN	sp|O14709|ZN197_HUMAN Zinc finger protein 197 OS=Homo sapiens OX=9606 GN=ZNF197 PE=2 SV=1	8.90817	118771	F215839.dat	Q25525_MS19-036_T2_R13	26	0.8	1	1	1	1	0	0	0	0	0	0	0	0	0	0	0	0	0	0	0	0	0	0	0	0	0	0	0	0	0	0	0	0	0	0	0	0	0	0	0	0	0	0
GSHR_HUMAN	sp|P00390|GSHR_HUMAN Glutathione reductase, mitochondrial OS=Homo sapiens OX=9606 GN=GSR PE=1 SV=2	8.74368	56221	F215881.dat	Q25549_MS19-036_T4_NR4	26	1.3	1	1	1	1	0	0	0	0	0	0	0	0	0	0	0	0	0	0	0	0	0	0	0	0	0	0	0	0	0	0	0	0	0	0	0	0	0	0	0	0	0	0
NWD1_HUMAN	sp|Q149M9|NWD1_HUMAN NACHT domain- and WD repeat-containing protein 1 OS=Homo sapiens OX=9606 GN=NWD1 PE=1 SV=3	6.28086	174441	F215925.dat	Q25568_MS19-036_T4_NR6	25	0.4	1	1	1	9	0	0	0	0	0	0	0	0	0	0	0	0	0	0	0	0	0	0	0	0	0	1	0	0	0	0	0	0	0	0	0	0	0	0	0	0	0	0
REXO5_HUMAN	sp|Q96IC2|REXO5_HUMAN RNA exonuclease 5 OS=Homo sapiens OX=9606 GN=REXO5 PE=2 SV=1	8.63817	86830	F215672.dat	Q25471_MS19-036_T3_R8	25	1.2	1	1	1	1	0	0	0	0	0	0	1	0	0	0	0	0	0	0	0	0	0	0	0	0	0	0	0	0	0	0	0	0	0	0	0	0	0	0	0	0	0	0
MAGI1_HUMAN	sp|Q96QZ7|MAGI1_HUMAN Membrane-associated guanylate kinase, WW and PDZ domain-containing protein 1 OS=Homo sapiens OX=9606 GN=MAGI1 PE=1 SV=3	7.301	164481	F215685.dat	Q25477_MS19-036_T4_NR18	25	0.5	1	1	1	1	0	0	0	0	0	0	0	0	0	0	0	0	1	0	0	0	0	0	0	0	0	0	0	0	0	0	0	0	0	0	0	0	0	0	0	0	0	0
PTN23_HUMAN	sp|Q9H3S7|PTN23_HUMAN Tyrosine-protein phosphatase non-receptor type 23 OS=Homo sapiens OX=9606 GN=PTPN23 PE=1 SV=1	6.44633	178861	F215704.dat	Q25483_MS19-036_T4_R17	25	0.4	1	1	1	23	0	0	0	0	0	0	1	0	0	0	0	1	1	1	0	0	1	1	1	1	0	0	0	1	0	0	0	0	0	1	0	0	0	1	0	0	1	2
ABHEB_HUMAN	sp|Q96IU4|ABHEB_HUMAN Protein ABHD14B OS=Homo sapiens OX=9606 GN=ABHD14B PE=1 SV=1	5.937	22332	F215921.dat	Q25564_MS19-036_T4_R6	25	3.3	1	1	1	36	0	0	0	0	0	0	0	0	0	0	0	0	0	0	0	0	0	0	0	0	0	0	0	0	0	0	0	0	0	0	0	0	1	0	2	0	0	0
CRIS2_HUMAN	sp|P16562|CRIS2_HUMAN Cysteine-rich secretory protein 2 OS=Homo sapiens OX=9606 GN=CRISP2 PE=1 SV=1	6.08861	27241	F215673.dat	Q25472_MS19-036_T1(Baseline)_R5	25	4.1	1	1	1	0	0	0	0	0	0	0	0	0	0	0	0	0	0	0	0	0	0	0	0	0	0	0	0	0	0	0	0	0	0	0	0	0	0	0	0	0	0	0
GSDMA_HUMAN	sp|Q96QA5|GSDMA_HUMAN Gasdermin-A OS=Homo sapiens OX=9606 GN=GSDMA PE=1 SV=4	5.18696	49334	F215671.dat	Q25470_MS19-036_T1(Baseline)_NR17	25	3.1	1	1	1	1	0	0	0	0	0	1	0	0	0	0	0	0	0	0	0	0	0	0	0	0	0	0	0	0	0	0	0	0	0	0	0	0	0	0	0	0	0	0
CHERP_HUMAN	sp|Q8IWX8|CHERP_HUMAN Calcium homeostasis endoplasmic reticulum protein OS=Homo sapiens OX=9606 GN=CHERP PE=1 SV=3	9.1497	103637	F215777.dat	Q25493_MS19-036_T1(Baseline)_NR11	25	0.8	1	1	1	1	0	0	0	0	0	0	0	0	0	0	0	0	0	0	0	0	0	0	0	0	0	0	0	0	0	0	0	1	0	0	0	0	0	0	0	0	0	0
LKHA4_HUMAN	sp|P09960|LKHA4_HUMAN Leukotriene A-4 hydrolase OS=Homo sapiens OX=9606 GN=LTA4H PE=1 SV=2	5.79755	69241	F215791.dat	Q25495_MS19-036_T4_NR16	25	1.5	1	1	1	1	0	0	0	0	0	0	0	0	0	0	0	0	0	0	0	0	0	0	0	0	0	0	0	0	0	0	0	0	0	1	0	0	0	0	0	0	0	0
ZFX_HUMAN	sp|P17010|ZFX_HUMAN Zinc finger X-chromosomal protein OS=Homo sapiens OX=9606 GN=ZFX PE=2 SV=2	5.70927	90464	F215833.dat	Q25519_MS19-036_T2_R7	25	0.9	1	1	1	1	0	0	0	0	0	0	0	0	0	0	0	0	0	0	0	0	0	0	0	0	0	0	0	0	0	0	0	0	0	0	0	0	0	0	0	0	0	0
TRI17_HUMAN	sp|Q9Y577|TRI17_HUMAN E3 ubiquitin-protein ligase TRIM17 OS=Homo sapiens OX=9606 GN=TRIM17 PE=1 SV=1	6.62467	54383	F215757.dat	Q25487_MS19-036_T1(Baseline)_R11	25	2.7	1	1	1	2	0	0	0	0	0	0	0	0	0	0	0	0	0	0	0	0	0	0	0	0	0	1	0	0	0	0	0	0	0	0	0	0	0	0	0	0	0	0
MNS1_HUMAN	sp|Q8NEH6|MNS1_HUMAN Meiosis-specific nuclear structural protein 1 OS=Homo sapiens OX=9606 GN=MNS1 PE=2 SV=2	6.73478	60533	F215936.dat	Q25571_MS19-036_T1(Baseline)_NR5	25	2	1	1	1	1	0	0	0	0	0	0	0	0	0	0	0	0	0	0	0	0	0	0	0	0	0	0	0	0	0	0	0	0	0	0	0	0	0	0	0	0	0	0
ASTRA_HUMAN	sp|Q96CP6|ASTRA_HUMAN Protein Aster-A OS=Homo sapiens OX=9606 GN=GRAMD1A PE=1 SV=2	6.28873	80630	F215675.dat	Q25474_MS19-036_T1(Baseline)_R9	25	1.1	1	1	1	1	0	0	0	0	0	0	0	0	0	1	0	0	0	0	0	0	0	0	0	0	0	0	0	0	0	0	0	0	0	0	0	0	0	0	0	0	0	0
SYVC_HUMAN	sp|P26640|SYVC_HUMAN Valine--tRNA ligase OS=Homo sapiens OX=9606 GN=VARS PE=1 SV=4	7.5297	140387	F215760.dat	Q25490_MS19-036_T4_NR17	25	0.6	1	1	1	1	0	0	0	0	0	0	0	0	0	0	0	0	0	0	0	0	0	0	0	0	0	0	0	0	1	0	0	0	0	0	0	0	0	0	0	0	0	0
SHQ1_HUMAN	sp|Q6PI26|SHQ1_HUMAN Protein SHQ1 homolog OS=Homo sapiens OX=9606 GN=SHQ1 PE=1 SV=2	4.69664	65084	F215687.dat	Q25479_MS19-036_T1(Baseline)_NR9	25	2.3	1	1	1	2	0	0	0	0	0	0	0	0	0	0	0	0	0	0	1	0	0	0	0	0	0	0	0	0	0	0	0	0	1	0	0	0	0	0	0	0	0	0
LRIQ1_HUMAN	sp|Q96JM4|LRIQ1_HUMAN Leucine-rich repeat and IQ domain-containing protein 1 OS=Homo sapiens OX=9606 GN=LRRIQ1 PE=2 SV=3	5.85081	199176	F215845.dat	Q25531_MS19-036_T3_R10	25	0.4	1	1	1	1	0	0	0	0	0	0	0	0	0	0	0	0	0	0	0	0	0	0	0	0	0	0	0	0	0	0	0	0	0	0	0	0	0	0	0	0	0	0
CYTSA_HUMAN	sp|Q69YQ0|CYTSA_HUMAN Cytospin-A OS=Homo sapiens OX=9606 GN=SPECC1L PE=1 SV=2	5.52459	124525	F215969.dat	Q25575_MS19-036_T4_R2	25	0.6	1	1	1	1	0	0	0	0	0	0	0	0	0	0	0	0	0	0	0	0	0	0	0	0	0	0	0	0	0	0	0	0	0	0	0	0	0	0	0	0	0	0
DAPK1_HUMAN	sp|P53355|DAPK1_HUMAN Death-associated protein kinase 1 OS=Homo sapiens OX=9606 GN=DAPK1 PE=1 SV=6	6.37129	159945	F215844.dat	Q25530_MS19-036_T1(Baseline)_R15	25	0.6	1	1	1	1	0	0	0	0	0	0	0	0	0	0	0	0	0	0	0	0	0	0	0	0	0	0	0	0	0	0	0	0	0	0	0	0	0	0	0	0	0	0
NGN2_HUMAN	sp|Q9H2A3|NGN2_HUMAN Neurogenin-2 OS=Homo sapiens OX=9606 GN=NEUROG2 PE=2 SV=2	7.65304	28603	F215824.dat	Q25510_MS19-036_T2_R9	25	4	1	1	1	1	0	0	0	0	0	0	0	0	0	0	0	0	0	0	0	0	0	0	0	0	0	0	0	0	0	0	0	0	0	0	0	0	0	0	0	0	0	0
RET3_HUMAN	sp|P10745|RET3_HUMAN Retinol-binding protein 3 OS=Homo sapiens OX=9606 GN=RBP3 PE=1 SV=2	4.98428	135277	F215921.dat	Q25564_MS19-036_T4_R6	25	0.6	1	1	1	34	0	0	0	0	0	0	0	0	0	0	0	0	0	0	0	0	0	0	0	0	0	0	0	0	0	0	0	0	0	0	0	0	1	0	2	0	0	0
SPTN4_HUMAN	sp|Q9H254|SPTN4_HUMAN Spectrin beta chain, non-erythrocytic 4 OS=Homo sapiens OX=9606 GN=SPTBN4 PE=1 SV=2	5.71765	288808	F215808.dat	Q25497_MS19-036_T4_NR15	25	0.3	1	1	1	2	0	0	0	0	0	0	0	0	0	0	0	0	0	0	0	0	0	0	0	0	0	0	0	0	0	0	0	0	0	0	0	1	0	0	0	0	0	0
TMC8_HUMAN	sp|Q8IU68|TMC8_HUMAN Transmembrane channel-like protein 8 OS=Homo sapiens OX=9606 GN=TMC8 PE=1 SV=1	9.49356	81589	F215834.dat	Q25520_MS19-036_T2_R17	25	1.9	1	1	1	2	0	0	0	0	0	0	0	0	0	0	0	0	0	0	0	0	0	0	0	0	0	0	0	0	0	0	0	0	0	0	0	0	0	0	0	0	0	0
SCRIB_HUMAN	sp|Q14160|SCRIB_HUMAN Protein scribble homolog OS=Homo sapiens OX=9606 GN=SCRIB PE=1 SV=4	5.01178	174778	F215904.dat	Q25560_MS19-036_T2_R8	25	0.7	1	1	1	1	0	0	0	0	0	0	0	0	0	0	0	0	0	0	0	0	0	0	0	0	0	0	0	0	0	0	0	0	0	0	0	0	0	0	0	0	0	0
CCD13_HUMAN	sp|Q8IYE1|CCD13_HUMAN Coiled-coil domain-containing protein 13 OS=Homo sapiens OX=9606 GN=CCDC13 PE=1 SV=2	8.82408	80834	F215897.dat	Q25555_MS19-036_T2_NR14	25	1	1	1	1	0	0	0	0	0	0	0	0	0	0	0	0	0	0	0	0	0	0	0	0	0	0	0	0	0	0	0	0	0	0	0	0	0	0	0	0	0	0	0
DACH2_HUMAN	sp|Q96NX9|DACH2_HUMAN Dachshund homolog 2 OS=Homo sapiens OX=9606 GN=DACH2 PE=2 SV=1	9.2162	65281	F215896.dat	Q25554_MS19-036_T3_NR8	25	1.8	1	1	1	1	0	0	0	0	0	0	0	0	0	0	0	0	0	0	0	0	0	0	0	0	0	0	0	0	0	0	0	0	0	0	0	0	0	0	0	0	0	0
TM11E_HUMAN	sp|Q9UL52|TM11E_HUMAN Transmembrane protease serine 11E OS=Homo sapiens OX=9606 GN=TMPRSS11E PE=1 SV=2	8.8502	47665	F215813.dat	Q25501_MS19-036_T2_NR6	25	1.7	1	1	1	1	0	0	0	0	0	0	0	0	0	0	0	0	0	0	0	0	0	0	0	0	0	0	0	0	0	0	0	0	0	0	0	0	0	0	0	1	0	0
PM2P2_HUMAN	sp|O95744|PM2P2_HUMAN Putative postmeiotic segregation increased 2-like protein 2 OS=Homo sapiens OX=9606 GN=PMS2P2 PE=5 SV=1	9.52219	32648	F215808.dat	Q25497_MS19-036_T4_NR15	25	2.7	1	1	1	1	0	0	0	0	0	0	0	0	0	0	0	0	0	0	0	0	0	0	0	0	0	0	0	0	0	0	0	0	0	0	0	1	0	0	0	0	0	0
MDN1_HUMAN	sp|Q9NU22|MDN1_HUMAN Midasin OS=Homo sapiens OX=9606 GN=MDN1 PE=1 SV=2	5.46115	632420	F215834.dat	Q25520_MS19-036_T2_R17	25	0.1	1	1	1	1	0	0	0	0	0	0	0	0	0	0	0	0	0	0	0	0	0	0	0	0	0	0	0	0	0	0	0	0	0	0	0	0	0	0	0	0	0	0
NDE1_HUMAN	sp|Q9NXR1|NDE1_HUMAN Nuclear distribution protein nudE homolog 1 OS=Homo sapiens OX=9606 GN=NDE1 PE=1 SV=3	5.08524	37698	F215666.dat	Q25465_MS19-036_T2_NR17	25	2.1	1	1	1	2	1	0	0	0	0	0	0	0	0	0	0	0	0	0	0	0	0	0	0	0	0	1	0	0	0	0	0	0	0	0	0	0	0	0	0	0	0	0
ADA21_HUMAN	sp|Q9UKJ8|ADA21_HUMAN Disintegrin and metalloproteinase domain-containing protein 21 OS=Homo sapiens OX=9606 GN=ADAM21 PE=2 SV=2	6.21932	80780	F215852.dat	Q25538_MS19-036_T3_R12	25	1.2	1	1	1	2	0	0	0	0	0	0	0	0	0	0	0	0	0	0	0	0	0	0	0	0	0	0	0	0	0	0	0	0	0	0	0	0	0	0	0	0	0	0
STEA4_HUMAN	sp|Q687X5|STEA4_HUMAN Metalloreductase STEAP4 OS=Homo sapiens OX=9606 GN=STEAP4 PE=1 SV=1	9.38877	51948	F215813.dat	Q25501_MS19-036_T2_NR6	25	2.2	1	1	1	4	0	0	1	0	0	0	0	0	0	0	0	0	0	0	0	0	0	0	2	0	0	0	0	0	0	0	0	0	0	0	0	0	0	0	0	1	0	0
EWS_HUMAN	sp|Q01844|EWS_HUMAN RNA-binding protein EWS OS=Homo sapiens OX=9606 GN=EWSR1 PE=1 SV=1	9.37006	68436	F215704.dat	Q25483_MS19-036_T4_R17	25	1.1	1	1	1	1	0	0	0	0	0	0	0	0	0	0	0	0	0	0	0	0	0	0	1	0	0	0	0	0	0	0	0	0	0	0	0	0	0	0	0	0	0	0
NR0B1_HUMAN	sp|P51843|NR0B1_HUMAN Nuclear receptor subfamily 0 group B member 1 OS=Homo sapiens OX=9606 GN=NR0B1 PE=1 SV=2	8.46637	51684	F215921.dat	Q25564_MS19-036_T4_R6	25	1.5	1	1	1	1	0	0	0	0	0	0	0	0	0	0	0	0	0	0	0	0	0	0	0	0	0	0	0	0	0	0	0	0	0	0	0	0	0	0	0	0	0	0
ASCC3_HUMAN	sp|Q8N3C0|ASCC3_HUMAN Activating signal cointegrator 1 complex subunit 3 OS=Homo sapiens OX=9606 GN=ASCC3 PE=1 SV=3	6.63899	251301	F215910.dat	Q25562_MS19-036_T4_R12	25	0.3	1	1	1	1	0	0	0	0	0	0	0	0	0	0	0	0	0	0	0	0	0	0	0	0	0	0	0	0	0	0	0	0	0	0	0	0	0	0	0	0	0	0
SYFB_HUMAN	sp|Q9NSD9|SYFB_HUMAN Phenylalanine--tRNA ligase beta subunit OS=Homo sapiens OX=9606 GN=FARSB PE=1 SV=3	6.39424	66074	F215975.dat	Q25578_MS19-036_T3_NR14	25	1.2	1	1	1	2	0	0	0	0	0	0	0	0	0	0	0	0	0	0	0	0	0	0	0	0	0	0	0	0	0	0	0	0	0	0	0	0	0	0	0	0	0	0
KRA45_HUMAN	sp|Q9BYR2|KRA45_HUMAN Keratin-associated protein 4-5 OS=Homo sapiens OX=9606 GN=KRTAP4-5 PE=1 SV=4	8.25168	19347	F215896.dat	Q25554_MS19-036_T3_NR8	25	15.5	1	1	1	0	0	0	0	0	0	0	0	0	0	0	0	0	0	0	0	0	0	0	0	0	0	0	0	0	0	0	0	0	0	0	0	0	0	0	0	0	0	0
CE85L_HUMAN	sp|Q5SZL2|CE85L_HUMAN Centrosomal protein of 85 kDa-like OS=Homo sapiens OX=9606 GN=CEP85L PE=1 SV=1	5.98433	91751	F215668.dat	Q25467_MS19-036_T4_R18	25	1.2	1	1	1	2	0	0	1	1	0	0	0	0	0	0	0	0	0	0	0	0	0	0	0	0	0	0	0	0	0	0	0	0	0	0	0	0	0	0	0	0	0	0
ZN777_HUMAN	sp|Q9ULD5|ZN777_HUMAN Zinc finger protein 777 OS=Homo sapiens OX=9606 GN=ZNF777 PE=1 SV=3	6.16007	93703	F215823.dat	Q25509_MS19-036_T2_R2	25	1	1	1	1	3	0	0	0	0	0	0	0	0	0	0	0	0	0	0	0	0	0	0	0	0	0	0	0	0	0	0	0	0	0	0	0	0	0	0	0	1	0	0
GRID1_HUMAN	sp|Q9ULK0|GRID1_HUMAN Glutamate receptor ionotropic, delta-1 OS=Homo sapiens OX=9606 GN=GRID1 PE=2 SV=2	6.23169	112060	F215783.dat	Q25494_MS19-036_T1(Baseline)_R13	25	1.2	1	1	1	1	0	0	0	0	0	0	0	0	0	0	0	0	0	0	0	0	0	0	0	0	0	0	0	0	0	0	0	0	1	0	0	0	0	0	0	0	0	0
SPESP_HUMAN	sp|Q6UW49|SPESP_HUMAN Sperm equatorial segment protein 1 OS=Homo sapiens OX=9606 GN=SPESP1 PE=1 SV=2	5.53159	38907	F215824.dat	Q25510_MS19-036_T2_R9	25	3.4	1	1	1	4	0	0	0	0	0	0	0	0	0	0	0	0	0	0	0	0	0	0	0	0	0	0	0	0	0	0	0	0	0	0	0	0	0	0	0	0	0	0
Z354C_HUMAN	sp|Q86Y25|Z354C_HUMAN Zinc finger protein 354C OS=Homo sapiens OX=9606 GN=ZNF354C PE=1 SV=1	8.36475	64805	F215921.dat	Q25564_MS19-036_T4_R6	25	1.3	1	1	1	1	0	0	0	0	0	0	0	0	0	0	0	0	0	0	0	0	0	0	0	0	0	0	0	0	0	0	0	0	0	0	0	0	0	0	0	0	0	0
MSH2_HUMAN	sp|P43246|MSH2_HUMAN DNA mismatch repair protein Msh2 OS=Homo sapiens OX=9606 GN=MSH2 PE=1 SV=1	5.58153	104677	F215852.dat	Q25538_MS19-036_T3_R12	25	1.4	1	1	1	3	0	1	0	0	0	0	0	0	0	0	0	0	0	0	0	0	0	0	0	0	0	0	0	0	0	0	0	0	0	0	0	0	0	0	0	0	0	0
GPX4_HUMAN	sp|P36969|GPX4_HUMAN Phospholipid hydroperoxide glutathione peroxidase OS=Homo sapiens OX=9606 GN=GPX4 PE=1 SV=3	8.68908	22160	F215704.dat	Q25483_MS19-036_T4_R17	25	4.1	1	1	1	15	0	0	0	0	0	0	1	0	0	0	0	1	1	1	0	0	1	1	1	1	0	0	0	0	0	0	0	0	0	0	0	0	0	1	0	0	1	2
GINM1_HUMAN	sp|Q9NU53|GINM1_HUMAN Glycoprotein integral membrane protein 1 OS=Homo sapiens OX=9606 GN=GINM1 PE=2 SV=1	4.81186	36817	F215876.dat	Q25546_MS19-036_T3_R13	25	2.1	1	1	1	8	0	0	0	0	0	0	0	0	0	0	0	0	0	0	0	0	0	0	0	0	0	0	0	0	0	0	0	0	0	0	0	0	0	0	0	0	0	0
IKZF4_HUMAN	sp|Q9H2S9|IKZF4_HUMAN Zinc finger protein Eos OS=Homo sapiens OX=9606 GN=IKZF4 PE=1 SV=2	6.38514	64065	F215851.dat	Q25537_MS19-036_T3_R9	25	1.4	1	1	1	5	0	0	0	0	0	0	0	0	0	0	0	0	0	0	0	0	0	0	0	1	0	0	0	0	0	0	0	0	0	0	0	0	0	0	0	0	0	0
CPMD8_HUMAN	sp|Q8IZJ3|CPMD8_HUMAN C3 and PZP-like alpha-2-macroglobulin domain-containing protein 8 OS=Homo sapiens OX=9606 GN=CPAMD8 PE=1 SV=2	5.99895	206571	F215838.dat	Q25524_MS19-036_T4_R3	25	0.7	1	1	1	2	0	0	0	1	0	0	0	0	0	0	0	0	0	0	0	0	0	0	0	0	0	0	0	0	0	0	0	0	0	0	0	0	0	0	0	0	0	0
SRGP2_HUMAN	sp|O75044|SRGP2_HUMAN SLIT-ROBO Rho GTPase-activating protein 2 OS=Homo sapiens OX=9606 GN=SRGAP2 PE=1 SV=3	6.25086	120795	F215838.dat	Q25524_MS19-036_T4_R3	25	0.7	1	1	1	1	0	0	0	0	0	0	0	0	0	0	0	0	0	0	0	0	0	0	0	0	0	0	0	0	0	0	0	0	0	0	0	0	0	0	0	0	0	0
KDM5A_HUMAN	sp|P29375|KDM5A_HUMAN Lysine-specific demethylase 5A OS=Homo sapiens OX=9606 GN=KDM5A PE=1 SV=3	6.12409	191972	F215777.dat	Q25493_MS19-036_T1(Baseline)_NR11	25	0.5	1	1	1	1	0	0	0	0	0	0	0	0	0	0	0	0	0	0	0	0	0	0	0	0	0	0	0	0	0	0	0	1	0	0	0	0	0	0	0	0	0	0
JMY_HUMAN	sp|Q8N9B5|JMY_HUMAN Junction-mediating and -regulatory protein OS=Homo sapiens OX=9606 GN=JMY PE=1 SV=2	5.88194	111376	F215947.dat	Q25572_MS19-036_T4_R10	25	1.1	1	1	1	1	0	0	0	0	0	0	0	0	0	0	0	0	0	0	0	0	0	0	0	0	0	0	0	0	0	0	0	0	0	0	0	0	0	0	0	0	0	0
CAVN4_HUMAN	sp|Q5BKX8|CAVN4_HUMAN Caveolae-associated protein 4 OS=Homo sapiens OX=9606 GN=CAVIN4 PE=1 SV=2	8.28746	41874	F215904.dat	Q25560_MS19-036_T2_R8	25	2.5	1	1	1	14	0	0	0	0	0	0	0	0	0	0	0	0	0	0	1	0	0	0	0	0	0	0	0	0	0	0	0	0	0	0	0	0	0	0	1	0	0	0
SAMD9_HUMAN	sp|Q5K651|SAMD9_HUMAN Sterile alpha motif domain-containing protein 9 OS=Homo sapiens OX=9606 GN=SAMD9 PE=1 SV=1	7.98377	184165	F215876.dat	Q25546_MS19-036_T3_R13	25	0.4	1	1	1	6	0	0	0	0	0	0	0	0	0	0	0	0	0	0	0	0	0	0	0	0	0	0	0	0	0	0	0	0	0	0	0	0	0	0	0	0	0	0
SYK_HUMAN	sp|Q15046|SYK_HUMAN Lysine--tRNA ligase OS=Homo sapiens OX=9606 GN=KARS PE=1 SV=3	5.94027	68005	F215956.dat	Q25573_MS19-036_T3_NR17	25	1.7	1	1	1	1	0	0	0	0	0	0	0	0	0	0	0	0	0	0	0	0	0	0	0	0	0	0	0	0	0	0	0	0	0	0	0	0	0	0	0	0	0	0
F217A_HUMAN	sp|Q8IXS0|F217A_HUMAN Protein FAM217A OS=Homo sapiens OX=9606 GN=FAM217A PE=2 SV=2	8.71689	57384	F215834.dat	Q25520_MS19-036_T2_R17	25	1.4	1	1	1	3	0	0	0	0	0	0	0	0	0	0	0	0	0	0	0	0	0	0	0	0	0	0	0	0	0	0	0	0	0	0	0	0	0	0	0	0	0	0
OGT1_HUMAN	sp|O15294|OGT1_HUMAN UDP-N-acetylglucosamine--peptide N-acetylglucosaminyltransferase 110 kDa subunit OS=Homo sapiens OX=9606 GN=OGT PE=1 SV=3	6.22274	116850	F215829.dat	Q25515_MS19-036_T2_R16	25	0.7	1	1	1	13	1	0	0	0	0	1	1	0	0	0	1	1	0	0	0	0	1	0	0	0	1	0	0	0	0	0	0	0	0	0	0	0	0	0	0	1	0	1
CC171_HUMAN	sp|Q6TFL3|CC171_HUMAN Coiled-coil domain-containing protein 171 OS=Homo sapiens OX=9606 GN=CCDC171 PE=2 SV=1	6.3673	152714	F215670.dat	Q25469_MS19-036_T2_R1	25	0.6	1	1	1	2	0	0	0	0	1	0	0	0	0	0	0	0	0	0	0	0	0	0	0	0	0	1	0	0	0	0	0	0	0	0	0	0	0	0	0	0	0	0
NDUF2_HUMAN	sp|Q8N183|NDUF2_HUMAN NADH dehydrogenase [ubiquinone] 1 alpha subcomplex assembly factor 2 OS=Homo sapiens OX=9606 GN=NDUFAF2 PE=1 SV=1	8.94094	19844	F215898.dat	Q25556_MS19-036_T2_NR1	25	4.7	1	1	1	1	0	0	0	0	0	0	0	0	0	0	0	0	0	0	0	0	0	0	0	0	0	0	0	0	0	0	0	0	0	0	0	0	0	0	0	0	0	0
APBB2_HUMAN	sp|Q92870|APBB2_HUMAN Amyloid-beta A4 precursor protein-binding family B member 2 OS=Homo sapiens OX=9606 GN=APBB2 PE=1 SV=3	5.73984	83321	F215838.dat	Q25524_MS19-036_T4_R3	24	0.9	1	1	1	1	0	0	0	0	0	0	0	0	0	0	0	0	0	0	0	0	0	0	0	0	0	0	0	0	0	0	0	0	0	0	0	0	0	0	0	0	0	0
TMC5B_HUMAN	sp|A8MYB1|TMC5B_HUMAN Transmembrane and coiled-coil domain-containing protein 5B OS=Homo sapiens OX=9606 GN=TMCO5B PE=3 SV=1	4.98024	35741	F215758.dat	Q25488_MS19-036_T4_R7	24	2.3	1	1	1	1	0	0	0	0	0	0	0	0	0	0	0	0	0	0	0	0	0	0	0	0	0	0	1	0	0	0	0	0	0	0	0	0	0	0	0	0	0	0
FSD2_HUMAN	sp|A1L4K1|FSD2_HUMAN Fibronectin type III and SPRY domain-containing protein 2 OS=Homo sapiens OX=9606 GN=FSD2 PE=1 SV=1	4.81478	85331	F215793.dat	Q25496_MS19-036_T3_R18	24	0.9	1	1	1	21	0	1	0	0	0	0	1	0	0	0	0	0	0	0	0	0	1	0	0	0	0	0	0	1	0	0	1	0	0	1	1	1	1	0	1	0	0	0
RRP1B_HUMAN	sp|Q14684|RRP1B_HUMAN Ribosomal RNA processing protein 1 homolog B OS=Homo sapiens OX=9606 GN=RRP1B PE=1 SV=3	9.76908	84375	F215872.dat	Q25542_MS19-036_T3_NR7	24	0.9	1	1	1	1	0	0	0	0	0	0	0	0	0	0	0	0	0	0	0	0	0	0	0	0	0	0	0	0	0	0	0	0	0	0	0	0	0	0	0	0	0	0
PYDC1_HUMAN	sp|Q8WXC3|PYDC1_HUMAN Pyrin domain-containing protein 1 OS=Homo sapiens OX=9606 GN=PYDC1 PE=1 SV=1	6.30095	10100	F215762.dat	Q25492_MS19-036_T3_R17	24	7.9	1	1	1	4	0	0	0	0	0	0	0	0	0	0	0	0	0	0	0	0	0	0	0	0	0	0	0	0	0	0	2	0	0	0	0	0	0	0	0	0	0	0
A14EL_HUMAN	sp|P0DKL9|A14EL_HUMAN ARL14 effector protein-like OS=Homo sapiens OX=9606 GN=ARL14EPL PE=4 SV=1	8.70702	17700	F215848.dat	Q25534_MS19-036_T3_R14	24	4.6	1	1	1	1	0	0	0	0	0	0	0	0	0	0	0	0	0	0	0	0	0	0	0	0	0	0	0	0	0	0	0	0	0	0	0	0	0	0	0	0	0	0
HPSE_HUMAN	sp|Q9Y251|HPSE_HUMAN Heparanase OS=Homo sapiens OX=9606 GN=HPSE PE=1 SV=2	9.3214	61110	F215810.dat	Q25499_MS19-036_T2_R15	24	2.2	1	1	1	1	0	0	0	0	0	0	0	0	0	0	0	0	0	0	0	0	0	0	0	0	0	0	0	0	0	0	0	0	0	0	0	0	0	1	0	0	0	0
ROCK2_HUMAN	sp|O75116|ROCK2_HUMAN Rho-associated protein kinase 2 OS=Homo sapiens OX=9606 GN=ROCK2 PE=1 SV=4	5.75374	160799	F215975.dat	Q25578_MS19-036_T3_NR14	24	0.5	1	1	1	1	0	0	0	0	0	0	0	0	0	0	0	0	0	0	0	0	0	0	0	0	0	0	0	0	0	0	0	0	0	0	0	0	0	0	0	0	0	0
PRG2_HUMAN	sp|P13727|PRG2_HUMAN Bone marrow proteoglycan OS=Homo sapiens OX=9606 GN=PRG2 PE=1 SV=2	6.3169	25189	F215791.dat	Q25495_MS19-036_T4_NR16	24	5	1	1	1	3	0	0	0	0	0	0	0	0	0	0	0	0	0	0	0	0	0	0	0	0	0	0	0	0	0	0	0	0	0	1	0	0	0	0	0	0	0	0
PROX2_HUMAN	sp|Q3B8N5|PROX2_HUMAN Prospero homeobox protein 2 OS=Homo sapiens OX=9606 GN=PROX2 PE=2 SV=3	9.28051	65545	F215824.dat	Q25510_MS19-036_T2_R9	24	2.4	1	1	1	1	0	0	0	0	0	0	0	0	0	0	0	0	0	0	0	0	0	0	0	0	0	0	0	0	0	0	0	0	0	0	0	0	0	0	0	0	0	0
MAGE1_HUMAN	sp|Q9HCI5|MAGE1_HUMAN Melanoma-associated antigen E1 OS=Homo sapiens OX=9606 GN=MAGEE1 PE=1 SV=2	5.24084	103190	F215824.dat	Q25510_MS19-036_T2_R9	24	0.8	1	1	1	1	0	0	0	0	0	0	0	0	0	0	0	0	0	0	0	0	0	0	0	0	0	0	0	0	0	0	0	0	0	0	0	0	0	0	0	0	0	0
LIX1L_HUMAN	sp|Q8IVB5|LIX1L_HUMAN LIX1-like protein OS=Homo sapiens OX=9606 GN=LIX1L PE=2 SV=1	8.80205	36539	F215833.dat	Q25519_MS19-036_T2_R7	24	2.1	1	1	1	52	0	0	0	0	0	0	0	1	1	0	0	0	0	0	1	1	1	0	0	0	0	1	0	0	0	1	0	1	1	0	0	0	1	1	1	1	0	0
KTNA1_HUMAN	sp|O75449|KTNA1_HUMAN Katanin p60 ATPase-containing subunit A1 OS=Homo sapiens OX=9606 GN=KATNA1 PE=1 SV=1	6.47189	55929	F215777.dat	Q25493_MS19-036_T1(Baseline)_NR11	24	2	1	1	1	1	0	0	0	0	0	0	0	0	0	0	0	0	0	0	0	0	0	0	0	0	0	0	0	0	0	0	0	1	0	0	0	0	0	0	0	0	0	0
KCD14_HUMAN	sp|Q9BQ13|KCD14_HUMAN BTB/POZ domain-containing protein KCTD14 OS=Homo sapiens OX=9606 GN=KCTD14 PE=1 SV=2	8.77562	29572	F216014.dat	Q25574_MS19-036_T3_NR6	24	2.7	1	1	1	1	0	0	0	0	0	0	0	0	0	0	0	0	0	0	0	0	0	0	0	0	0	0	0	0	0	0	0	0	0	0	0	0	0	0	0	0	0	0
SP140_HUMAN	sp|Q13342|SP140_HUMAN Nuclear body protein SP140 OS=Homo sapiens OX=9606 GN=SP140 PE=1 SV=2	5.20822	98160	F215808.dat	Q25497_MS19-036_T4_NR15	24	0.8	1	1	1	2	0	0	0	0	0	0	0	0	0	0	0	0	0	0	0	0	0	0	0	0	0	0	0	0	0	0	0	0	0	0	0	1	0	0	0	0	0	0
TMM69_HUMAN	sp|Q5SWH9|TMM69_HUMAN Transmembrane protein 69 OS=Homo sapiens OX=9606 GN=TMEM69 PE=2 SV=1	9.98423	27533	F215834.dat	Q25520_MS19-036_T2_R17	24	4	1	1	1	11	0	0	0	0	0	0	0	0	0	0	0	0	0	0	0	0	0	0	0	0	0	0	0	0	0	0	0	1	0	0	0	0	1	0	0	0	0	0
CACP_HUMAN	sp|P43155|CACP_HUMAN Carnitine O-acetyltransferase OS=Homo sapiens OX=9606 GN=CRAT PE=1 SV=5	8.63081	70812	F215823.dat	Q25509_MS19-036_T2_R2	24	1.1	1	1	1	14	0	0	0	0	0	0	0	0	0	0	0	0	0	0	0	0	0	0	0	0	0	0	0	0	0	0	1	0	0	0	0	0	0	0	1	0	0	0
S35G2_HUMAN	sp|Q8TBE7|S35G2_HUMAN Solute carrier family 35 member G2 OS=Homo sapiens OX=9606 GN=SLC35G2 PE=1 SV=3	6.98745	46391	F215877.dat	Q25547_MS19-036_T3_NR12	24	2.2	1	1	1	4	0	0	0	0	0	0	0	0	0	0	0	0	0	0	0	0	0	0	0	0	0	0	0	0	0	0	0	0	0	0	0	0	0	0	0	0	0	0
FANCB_HUMAN	sp|Q8NB91|FANCB_HUMAN Fanconi anemia group B protein OS=Homo sapiens OX=9606 GN=FANCB PE=1 SV=1	7.79428	97663	F215847.dat	Q25533_MS19-036_T2_R18	24	0.8	1	1	1	5	0	0	0	0	0	0	0	0	0	0	0	0	0	0	0	0	0	0	0	0	0	0	0	0	0	0	0	0	0	0	0	0	0	0	0	1	0	0
TMEDA_HUMAN	sp|P49755|TMEDA_HUMAN Transmembrane emp24 domain-containing protein 10 OS=Homo sapiens OX=9606 GN=TMED10 PE=1 SV=2	6.97575	24960	F215851.dat	Q25537_MS19-036_T3_R9	24	4.1	1	1	1	1	0	0	0	0	0	0	0	0	0	0	0	0	0	0	0	0	0	0	0	0	0	0	0	0	0	0	0	0	0	0	0	0	0	0	0	0	0	0
PADI3_HUMAN	sp|Q9ULW8|PADI3_HUMAN Protein-arginine deiminase type-3 OS=Homo sapiens OX=9606 GN=PADI3 PE=1 SV=2	5.29584	74695	F215851.dat	Q25537_MS19-036_T3_R9	24	2	1	1	1	1	0	0	0	0	0	0	0	0	0	0	0	0	0	0	0	0	0	0	0	0	0	0	0	0	0	0	0	0	0	0	0	0	0	0	0	0	0	0
CC90B_HUMAN	sp|Q9GZT6|CC90B_HUMAN Coiled-coil domain-containing protein 90B, mitochondrial OS=Homo sapiens OX=9606 GN=CCDC90B PE=1 SV=2	6.98924	29487	F215831.dat	Q25517_MS19-036_T2_R4	24	2.8	1	1	1	0	0	0	0	0	0	0	0	0	0	0	0	0	0	0	0	0	0	0	0	0	0	0	0	0	0	0	0	0	0	0	0	0	0	0	0	0	0	0
MOT7_HUMAN	sp|O15403|MOT7_HUMAN Monocarboxylate transporter 7 OS=Homo sapiens OX=9606 GN=SLC16A6 PE=1 SV=2	7.94906	57356	F215847.dat	Q25533_MS19-036_T2_R18	24	1.3	1	1	1	3	0	0	0	0	0	0	0	0	0	0	0	0	0	0	0	0	0	0	0	0	0	0	0	0	0	0	0	0	0	0	0	0	0	0	0	0	0	0
PADI2_HUMAN	sp|Q9Y2J8|PADI2_HUMAN Protein-arginine deiminase type-2 OS=Homo sapiens OX=9606 GN=PADI2 PE=1 SV=2	5.40083	75515	F215840.dat	Q25526_MS19-036_T1(Baseline)_NR15	24	2.1	1	1	1	1	0	0	0	0	0	0	0	0	0	0	0	0	0	0	0	0	0	0	0	0	0	0	0	0	0	0	0	0	0	0	0	0	0	0	0	0	0	0
RYR2_HUMAN	sp|Q92736|RYR2_HUMAN Ryanodine receptor 2 OS=Homo sapiens OX=9606 GN=RYR2 PE=1 SV=3	5.72931	564206	F215975.dat	Q25578_MS19-036_T3_NR14	24	0.2	1	1	1	1	0	0	0	0	0	0	0	0	0	0	0	0	0	0	0	0	0	0	0	0	0	0	0	0	0	0	0	0	0	0	0	0	0	0	0	0	0	0
RPGP1_HUMAN	sp|P47736|RPGP1_HUMAN Rap1 GTPase-activating protein 1 OS=Homo sapiens OX=9606 GN=RAP1GAP PE=1 SV=2	5.55209	73315	F215820.dat	Q25506_MS19-036_T4_R4	24	1.1	1	1	1	1	0	0	0	0	0	0	0	0	0	0	0	0	0	0	0	0	0	0	0	0	0	0	0	0	0	0	0	0	0	0	0	0	0	0	0	0	0	0
CLC14_HUMAN	sp|Q86T13|CLC14_HUMAN C-type lectin domain family 14 member A OS=Homo sapiens OX=9606 GN=CLEC14A PE=1 SV=1	5.97651	51603	F215669.dat	Q25468_MS19-036_T3_R7	24	2.2	1	1	1	1	0	0	0	1	0	0	0	0	0	0	0	0	0	0	0	0	0	0	0	0	0	0	0	0	0	0	0	0	0	0	0	0	0	0	0	0	0	0
TF3C3_HUMAN	sp|Q9Y5Q9|TF3C3_HUMAN General transcription factor 3C polypeptide 3 OS=Homo sapiens OX=9606 GN=GTF3C3 PE=1 SV=1	4.97769	101208	F215922.dat	Q25565_MS19-036_T3_NR10	24	1	1	1	1	2	0	0	0	0	0	0	0	0	0	0	0	0	0	0	0	0	0	0	0	0	0	0	0	0	0	0	0	0	0	0	0	0	0	0	0	0	0	0
CCD84_HUMAN	sp|Q86UT8|CCD84_HUMAN Coiled-coil domain-containing protein 84 OS=Homo sapiens OX=9606 GN=CCDC84 PE=1 SV=1	8.48196	37950	F215820.dat	Q25506_MS19-036_T4_R4	24	3	1	1	1	1	0	0	0	0	0	0	0	0	0	0	0	0	0	0	0	0	0	0	0	0	0	0	0	0	0	0	0	0	0	0	0	0	0	0	0	0	0	0
KIF2A_HUMAN	sp|O00139|KIF2A_HUMAN Kinesin-like protein KIF2A OS=Homo sapiens OX=9606 GN=KIF2A PE=1 SV=3	6.27846	79905	F215848.dat	Q25534_MS19-036_T3_R14	24	1	1	1	1	1	0	0	0	0	0	0	0	0	0	0	0	0	0	0	0	0	0	0	0	0	0	0	0	0	0	0	0	0	0	0	0	0	0	0	0	0	0	0
CR2_HUMAN	sp|P20023|CR2_HUMAN Complement receptor type 2 OS=Homo sapiens OX=9606 GN=CR2 PE=1 SV=2	7.73545	112842	F215947.dat	Q25572_MS19-036_T4_R10	24	1.4	1	1	1	1	0	0	0	0	0	0	0	0	0	0	0	0	0	0	0	0	0	0	0	0	0	0	0	0	0	0	0	0	0	0	0	0	0	0	0	0	0	0
STX12_HUMAN	sp|Q86Y82|STX12_HUMAN Syntaxin-12 OS=Homo sapiens OX=9606 GN=STX12 PE=1 SV=1	5.45312	31622	F215818.dat	Q25504_MS19-036_T1(Baseline)_NR10	24	3.6	1	1	1	1	0	0	0	0	0	0	0	0	0	0	0	0	0	0	0	0	0	0	0	0	0	0	0	0	0	0	0	0	0	0	0	0	0	0	0	0	0	0
N42L2_HUMAN	sp|Q92802|N42L2_HUMAN NEDD4-binding protein 2-like 2 OS=Homo sapiens OX=9606 GN=N4BP2L2 PE=1 SV=1	5.96291	67417	F215975.dat	Q25578_MS19-036_T3_NR14	24	1.2	1	1	1	1	0	0	0	0	0	0	0	0	0	0	0	0	0	0	0	0	0	0	0	0	0	0	0	0	0	0	0	0	0	0	0	0	0	0	0	0	0	0
KMT2C_HUMAN	sp|Q8NEZ4|KMT2C_HUMAN Histone-lysine N-methyltransferase 2C OS=Homo sapiens OX=9606 GN=KMT2C PE=1 SV=3	6.07225	541028	F215810.dat	Q25499_MS19-036_T2_R15	24	0.1	1	1	1	2	0	0	0	0	0	0	0	0	0	0	0	0	0	0	0	0	0	0	0	0	0	0	0	0	0	0	0	0	0	0	0	0	0	1	0	0	0	0
PTPRJ_HUMAN	sp|Q12913|PTPRJ_HUMAN Receptor-type tyrosine-protein phosphatase eta OS=Homo sapiens OX=9606 GN=PTPRJ PE=1 SV=3	5.37604	145851	F215881.dat	Q25549_MS19-036_T4_NR4	24	0.5	1	1	1	4	0	0	0	0	0	0	0	0	0	0	0	0	0	0	0	0	0	0	0	0	0	0	0	0	0	0	0	0	0	0	0	0	0	0	0	0	0	0
PAI1_HUMAN	sp|P05121|PAI1_HUMAN Plasminogen activator inhibitor 1 OS=Homo sapiens OX=9606 GN=SERPINE1 PE=1 SV=1	6.67589	45031	F215983.dat	Q25583_MS19-036_T4_NR3	24	2	1	1	1	2	0	0	0	0	0	0	0	0	0	0	0	0	0	0	0	0	0	0	0	0	0	0	0	0	0	0	0	0	0	0	0	0	0	0	0	0	0	0
GBG5_HUMAN	sp|P63218|GBG5_HUMAN Guanine nucleotide-binding protein G(I)/G(S)/G(O) subunit gamma-5 OS=Homo sapiens OX=9606 GN=GNG5 PE=1 SV=3	9.89641	7314	F215704.dat	Q25483_MS19-036_T4_R17	24	16.2	1	1	1	1	0	0	0	0	0	0	0	0	0	0	0	0	0	0	0	0	0	0	1	0	0	0	0	0	0	0	0	0	0	0	0	0	0	0	0	0	0	0
TRPC3_HUMAN	sp|Q13507|TRPC3_HUMAN Short transient receptor potential channel 3 OS=Homo sapiens OX=9606 GN=TRPC3 PE=1 SV=3	6.24549	95947	F215837.dat	Q25523_MS19-036_T4_NR14	24	1.7	1	1	1	1	0	0	0	0	0	0	0	0	0	0	0	0	0	0	0	0	0	0	0	0	0	0	0	0	0	0	0	0	0	0	0	0	0	0	0	0	0	0
TBD2B_HUMAN	sp|Q9UPU7|TBD2B_HUMAN TBC1 domain family member 2B OS=Homo sapiens OX=9606 GN=TBC1D2B PE=1 SV=2	5.84504	109812	F215969.dat	Q25575_MS19-036_T4_R2	24	0.8	1	1	1	1	0	0	0	0	0	0	0	0	0	0	0	0	0	0	0	0	0	0	0	0	0	0	0	0	0	0	0	0	0	0	0	0	0	0	0	0	0	0
TSHR_HUMAN	sp|P16473|TSHR_HUMAN Thyrotropin receptor OS=Homo sapiens OX=9606 GN=TSHR PE=1 SV=2	6.55633	86773	F215936.dat	Q25571_MS19-036_T1(Baseline)_NR5	24	0.9	1	1	1	1	0	0	0	0	0	0	0	0	0	0	0	0	0	0	0	0	0	0	0	0	0	0	0	0	0	0	0	0	0	0	0	0	0	0	0	0	0	0
MRP3_HUMAN	sp|O15438|MRP3_HUMAN Canalicular multispecific organic anion transporter 2 OS=Homo sapiens OX=9606 GN=ABCC3 PE=1 SV=3	6.79019	169234	F215906.dat	Q25561_MS19-036_T4_NR2	24	0.6	1	1	1	0	0	0	0	0	0	0	0	0	0	0	0	0	0	0	0	0	0	0	0	0	0	0	0	0	0	0	0	0	0	0	0	0	0	0	0	0	0	0
SDHL_HUMAN	sp|P20132|SDHL_HUMAN L-serine dehydratase/L-threonine deaminase OS=Homo sapiens OX=9606 GN=SDS PE=1 SV=2	8.15179	34603	F215846.dat	Q25532_MS19-036_T2_NR18	24	2.4	1	1	1	10	0	0	1	0	0	0	0	0	0	0	0	0	0	0	0	0	0	0	0	0	0	0	0	0	0	0	0	0	0	0	0	0	0	0	0	0	0	0
DNAL1_HUMAN	sp|Q4LDG9|DNAL1_HUMAN Dynein light chain 1, axonemal OS=Homo sapiens OX=9606 GN=DNAL1 PE=1 SV=1	5.87126	21519	F215704.dat	Q25483_MS19-036_T4_R17	24	5.3	1	1	1	1	0	0	0	0	0	0	0	0	0	0	0	0	0	0	0	0	0	0	1	0	0	0	0	0	0	0	0	0	0	0	0	0	0	0	0	0	0	0
MROH1_HUMAN	sp|Q8NDA8|MROH1_HUMAN Maestro heat-like repeat-containing protein family member 1 OS=Homo sapiens OX=9606 GN=MROH1 PE=2 SV=3	6.4383	181134	F215833.dat	Q25519_MS19-036_T2_R7	24	0.4	1	1	1	2	0	0	0	0	0	0	0	0	0	0	0	0	0	0	0	0	0	0	0	0	0	1	0	0	0	0	0	0	0	0	0	0	0	0	0	0	0	0
A1ATR_HUMAN	sp|P20848|A1ATR_HUMAN Putative alpha-1-antitrypsin-related protein OS=Homo sapiens OX=9606 GN=SERPINA2 PE=1 SV=1	7.73248	47861	F215924.dat	Q25567_MS19-036_T4_R14	24	1.9	1	1	1	3	0	0	0	0	0	0	0	0	0	0	0	0	0	0	0	0	0	0	0	0	0	0	0	0	0	0	0	0	0	0	0	0	0	0	0	0	0	0
AN30B_HUMAN	sp|Q9BXX2|AN30B_HUMAN Ankyrin repeat domain-containing protein 30B OS=Homo sapiens OX=9606 GN=ANKRD30B PE=2 SV=3	6.00641	157950	F215666.dat	Q25465_MS19-036_T2_NR17	24	0.5	1	1	1	1	1	0	0	0	0	0	0	0	0	0	0	0	0	0	0	0	0	0	0	0	0	0	0	0	0	0	0	0	0	0	0	0	0	0	0	0	0	0
ASAP1_HUMAN	sp|Q9ULH1|ASAP1_HUMAN Arf-GAP with SH3 domain, ANK repeat and PH domain-containing protein 1 OS=Homo sapiens OX=9606 GN=ASAP1 PE=1 SV=4	6.9532	125420	F215704.dat	Q25483_MS19-036_T4_R17	24	1	1	1	1	1	0	0	0	0	0	0	0	0	0	0	0	0	0	0	0	0	0	0	1	0	0	0	0	0	0	0	0	0	0	0	0	0	0	0	0	0	0	0
MYO5A_HUMAN	sp|Q9Y4I1|MYO5A_HUMAN Unconventional myosin-Va OS=Homo sapiens OX=9606 GN=MYO5A PE=1 SV=2	8.70033	215269	F215868.dat	Q25541_MS19-036_T1(Baseline)_NR3	24	0.4	1	1	1	1	0	0	0	0	0	0	0	0	0	0	0	0	0	0	0	0	0	0	0	0	0	0	0	0	0	0	0	0	0	0	0	0	0	0	0	0	0	0
BICD1_HUMAN	sp|Q96G01|BICD1_HUMAN Protein bicaudal D homolog 1 OS=Homo sapiens OX=9606 GN=BICD1 PE=1 SV=3	5.59707	110682	F215852.dat	Q25538_MS19-036_T3_R12	24	1.1	1	1	1	1	0	0	0	0	0	0	0	0	0	0	0	0	0	0	0	0	0	0	0	0	0	0	0	0	0	0	0	0	0	0	0	0	0	0	0	0	0	0
RT14_HUMAN	sp|O60783|RT14_HUMAN 28S ribosomal protein S14, mitochondrial OS=Homo sapiens OX=9606 GN=MRPS14 PE=1 SV=1	11.4159	15129	F215900.dat	Q25558_MS19-036_T3_R4	24	8.6	1	1	1	1	0	0	0	0	0	0	0	0	0	0	0	0	0	0	0	0	0	0	0	0	0	0	0	0	0	0	0	0	0	0	0	0	0	0	0	0	0	0
SON_HUMAN	sp|P18583|SON_HUMAN Protein SON OS=Homo sapiens OX=9606 GN=SON PE=1 SV=4	5.49581	263664	F215975.dat	Q25578_MS19-036_T3_NR14	24	0.3	1	1	1	1	0	0	0	0	0	0	0	0	0	0	0	0	0	0	0	0	0	0	0	0	0	0	0	0	0	0	0	0	0	0	0	0	0	0	0	0	0	0
TERT_HUMAN	sp|O14746|TERT_HUMAN Telomerase reverse transcriptase OS=Homo sapiens OX=9606 GN=TERT PE=1 SV=1	10.536	126916	F215833.dat	Q25519_MS19-036_T2_R7	24	0.6	1	1	1	52	0	0	0	0	0	0	0	1	1	0	0	0	0	0	1	1	1	0	0	0	0	1	0	0	0	1	0	1	1	0	0	0	1	1	1	1	0	0
MRP9_HUMAN	sp|Q96J65|MRP9_HUMAN Multidrug resistance-associated protein 9 OS=Homo sapiens OX=9606 GN=ABCC12 PE=1 SV=2	8.64134	152200	F215906.dat	Q25561_MS19-036_T4_NR2	24	0.7	1	1	1	0	0	0	0	0	0	0	0	0	0	0	0	0	0	0	0	0	0	0	0	0	0	0	0	0	0	0	0	0	0	0	0	0	0	0	0	0	0	0
CCD25_HUMAN	sp|Q86WR0|CCD25_HUMAN Coiled-coil domain-containing protein 25 OS=Homo sapiens OX=9606 GN=CCDC25 PE=1 SV=2	6.34016	24463	F215834.dat	Q25520_MS19-036_T2_R17	24	3.8	1	1	1	1	0	0	0	0	0	0	0	0	0	0	0	0	0	0	0	0	0	0	0	0	0	0	0	0	0	0	0	0	0	0	0	0	0	0	0	0	0	0
FSIP2_HUMAN	sp|Q5CZC0|FSIP2_HUMAN Fibrous sheath-interacting protein 2 OS=Homo sapiens OX=9606 GN=FSIP2 PE=2 SV=4	6.27135	780119	F215844.dat	Q25530_MS19-036_T1(Baseline)_R15	24	0.1	1	1	1	1	0	0	0	0	0	0	0	0	0	0	0	0	0	0	0	0	0	0	0	0	0	0	0	0	0	0	0	0	0	0	0	0	0	0	0	0	0	0
SLK_HUMAN	sp|Q9H2G2|SLK_HUMAN STE20-like serine/threonine-protein kinase OS=Homo sapiens OX=9606 GN=SLK PE=1 SV=1	5.08375	142607	F215850.dat	Q25536_MS19-036_T3_R15	24	0.8	1	1	1	1	0	0	0	0	0	0	0	0	0	0	0	0	0	0	0	0	0	0	0	0	0	0	0	0	0	0	0	0	0	0	0	0	0	0	0	0	0	0
OTOP3_HUMAN	sp|Q7RTS5|OTOP3_HUMAN Proton channel OTOP3 OS=Homo sapiens OX=9606 GN=OTOP3 PE=1 SV=1	8.96292	66253	F215818.dat	Q25504_MS19-036_T1(Baseline)_NR10	24	1.7	1	1	1	1	0	0	0	0	0	0	0	0	0	0	0	0	0	0	0	0	0	0	0	0	0	0	0	0	0	0	0	0	0	0	0	0	0	0	0	0	0	0
SNTG2_HUMAN	sp|Q9NY99|SNTG2_HUMAN Gamma-2-syntrophin OS=Homo sapiens OX=9606 GN=SNTG2 PE=1 SV=2	7.58629	60178	F215888.dat	Q25551_MS19-036_T4_R5	24	1.5	1	1	1	1	0	0	0	0	0	0	0	0	0	0	0	0	0	0	0	0	0	0	0	0	0	0	0	0	0	0	0	0	0	0	0	0	0	0	0	0	0	0
PTPA_HUMAN	sp|Q15257|PTPA_HUMAN Serine/threonine-protein phosphatase 2A activator OS=Homo sapiens OX=9606 GN=PTPA PE=1 SV=3	5.62621	40641	F215972.dat	Q25576_MS19-036_T4_R13	24	2	1	1	1	2	0	0	0	0	0	0	0	0	0	0	0	0	0	0	0	0	0	0	0	0	0	0	0	0	0	0	0	0	0	0	0	0	0	0	0	0	0	0
SYSM_HUMAN	sp|Q9NP81|SYSM_HUMAN Serine--tRNA ligase, mitochondrial OS=Homo sapiens OX=9606 GN=SARS2 PE=1 SV=1	8.34593	58246	F215848.dat	Q25534_MS19-036_T3_R14	24	1.4	1	1	1	1	0	0	0	0	0	0	0	0	0	0	0	0	0	0	0	0	0	0	0	0	0	0	0	0	0	0	0	0	0	0	0	0	0	0	0	0	0	0
SIAT9_HUMAN	sp|Q9UNP4|SIAT9_HUMAN Lactosylceramide alpha-2,3-sialyltransferase OS=Homo sapiens OX=9606 GN=ST3GAL5 PE=1 SV=4	9.12951	47959	F215704.dat	Q25483_MS19-036_T4_R17	24	1.9	1	1	1	2	0	0	0	0	0	0	0	0	0	0	0	0	0	0	0	0	0	0	1	0	0	0	0	0	0	0	0	0	0	0	0	0	0	0	0	0	0	0
AP2A_HUMAN	sp|P05549|AP2A_HUMAN Transcription factor AP-2-alpha OS=Homo sapiens OX=9606 GN=TFAP2A PE=1 SV=1	8.10328	48032	F215973.dat	Q25577_MS19-036_T4_R15	24	1.6	1	1	1	1	0	0	0	0	0	0	0	0	0	0	0	0	0	0	0	0	0	0	0	0	0	0	0	0	0	0	0	0	0	0	0	0	0	0	0	0	0	0
SPA2L_HUMAN	sp|Q8IUW3|SPA2L_HUMAN Spermatogenesis-associated protein 2-like protein OS=Homo sapiens OX=9606 GN=SPATA2L PE=2 SV=1	5.349	46149	F215847.dat	Q25533_MS19-036_T2_R18	24	1.9	1	1	1	3	0	0	0	0	0	0	0	0	0	0	0	0	0	0	0	0	0	0	0	0	0	0	0	0	0	0	0	0	0	0	0	0	0	0	0	0	0	0
FMNL1_HUMAN	sp|O95466|FMNL1_HUMAN Formin-like protein 1 OS=Homo sapiens OX=9606 GN=FMNL1 PE=1 SV=3	5.5572	121777	F215689.dat	Q25481_MS19-036_T2_NR13	24	1.3	1	1	1	1	0	0	0	0	0	0	0	0	0	0	0	0	0	0	0	0	1	0	0	0	0	0	0	0	0	0	0	0	0	0	0	0	0	0	0	0	0	0
RGSL_HUMAN	sp|A5PLK6|RGSL_HUMAN Regulator of G-protein signaling protein-like OS=Homo sapiens OX=9606 GN=RGSL1 PE=2 SV=1	9.14862	125607	F215721.dat	Q25484_MS19-036_T2_R14	24	0.7	1	1	1	8	0	0	0	0	0	0	0	0	0	0	0	0	0	0	0	0	0	0	0	1	1	0	0	0	0	0	0	0	0	0	0	1	0	0	0	1	0	1
CAN11_HUMAN	sp|Q9UMQ6|CAN11_HUMAN Calpain-11 OS=Homo sapiens OX=9606 GN=CAPN11 PE=2 SV=2	5.39291	84369	F215834.dat	Q25520_MS19-036_T2_R17	24	0.9	1	1	1	1	0	0	0	0	0	0	0	0	0	0	0	0	0	0	0	0	0	0	0	0	0	0	0	0	0	0	0	0	0	0	0	0	0	0	0	0	0	0
ROBO4_HUMAN	sp|Q8WZ75|ROBO4_HUMAN Roundabout homolog 4 OS=Homo sapiens OX=9606 GN=ROBO4 PE=1 SV=1	6.18001	107390	F215834.dat	Q25520_MS19-036_T2_R17	24	0.8	1	1	1	1	0	0	0	0	0	0	0	0	0	0	0	0	0	0	0	0	0	0	0	0	0	0	0	0	0	0	0	0	0	0	0	0	0	0	0	0	0	0
RAB7A_HUMAN	sp|P51149|RAB7A_HUMAN Ras-related protein Rab-7a OS=Homo sapiens OX=9606 GN=RAB7A PE=1 SV=1	6.39501	23475	F215817.dat	Q25503_MS19-036_T2_NR10	24	8.7	1	1	1	1	0	0	0	0	0	0	0	0	0	0	0	0	0	0	0	0	0	0	0	0	0	0	0	0	0	0	0	0	0	0	0	0	0	0	0	0	0	1
MCE1_HUMAN	sp|O60942|MCE1_HUMAN mRNA-capping enzyme OS=Homo sapiens OX=9606 GN=RNGTT PE=1 SV=1	8.43033	68513	F215897.dat	Q25555_MS19-036_T2_NR14	23	2.3	1	1	1	1	0	0	0	0	0	0	0	0	0	0	0	0	0	0	0	0	0	0	0	0	0	0	0	0	0	0	0	0	0	0	0	0	0	0	0	0	0	0
ZN648_HUMAN	sp|Q5T619|ZN648_HUMAN Zinc finger protein 648 OS=Homo sapiens OX=9606 GN=ZNF648 PE=2 SV=1	8.9715	62301	F215910.dat	Q25562_MS19-036_T4_R12	23	1.4	1	1	1	5	0	0	0	0	0	0	0	0	0	0	0	0	0	0	0	0	0	0	0	0	0	0	0	0	0	0	1	0	0	0	0	0	0	0	0	0	0	0
GLT12_HUMAN	sp|Q8IXK2|GLT12_HUMAN Polypeptide N-acetylgalactosaminyltransferase 12 OS=Homo sapiens OX=9606 GN=GALNT12 PE=1 SV=3	6.34675	66896	F215691.dat	Q25482_MS19-036_T1(Baseline)_NR2	23	1.5	1	1	1	1	0	0	0	0	0	0	0	0	0	0	0	0	0	0	0	0	0	1	0	0	0	0	0	0	0	0	0	0	0	0	0	0	0	0	0	0	0	0
CP1A1_HUMAN	sp|P04798|CP1A1_HUMAN Cytochrome P450 1A1 OS=Homo sapiens OX=9606 GN=CYP1A1 PE=1 SV=1	8.60944	58128	F215813.dat	Q25501_MS19-036_T2_NR6	23	2.1	1	1	1	1	0	0	0	0	0	0	0	0	0	0	0	0	0	0	0	0	0	0	0	0	0	0	0	0	0	0	0	0	0	0	0	0	0	0	0	1	0	0
MAST2_HUMAN	sp|Q6P0Q8|MAST2_HUMAN Microtubule-associated serine/threonine-protein kinase 2 OS=Homo sapiens OX=9606 GN=MAST2 PE=1 SV=2	8.40681	196315	F215667.dat	Q25466_MS19-036_T3_R11	23	0.6	1	1	1	1	0	1	0	0	0	0	0	0	0	0	0	0	0	0	0	0	0	0	0	0	0	0	0	0	0	0	0	0	0	0	0	0	0	0	0	0	0	0
SDK2_HUMAN	sp|Q58EX2|SDK2_HUMAN Protein sidekick-2 OS=Homo sapiens OX=9606 GN=SDK2 PE=1 SV=3	6.61772	239248	F215838.dat	Q25524_MS19-036_T4_R3	23	0.3	1	1	1	7	0	0	0	0	0	0	0	0	0	0	0	0	0	0	0	0	0	0	0	0	0	0	0	0	0	0	0	0	0	0	0	0	0	0	0	0	0	0
CDA7L_HUMAN	sp|Q96GN5|CDA7L_HUMAN Cell division cycle-associated 7-like protein OS=Homo sapiens OX=9606 GN=CDCA7L PE=1 SV=2	5.5891	52174	F215843.dat	Q25529_MS19-036_T1(Baseline)_NR4	23	1.5	1	1	1	1	0	0	0	0	0	0	0	0	0	0	0	0	0	0	0	0	0	0	0	0	0	0	0	0	0	0	0	0	0	0	0	0	0	0	0	0	0	0
TRI75_HUMAN	sp|A6NK02|TRI75_HUMAN Putative tripartite motif-containing protein 75 OS=Homo sapiens OX=9606 GN=TRIM75P PE=5 SV=2	7.78942	53643	F215845.dat	Q25531_MS19-036_T3_R10	23	2.4	1	1	1	2	0	0	0	0	0	0	0	0	0	0	0	0	0	0	0	0	0	0	0	0	0	0	0	0	0	0	0	0	0	0	0	0	0	0	0	0	0	0
ZBT17_HUMAN	sp|Q13105|ZBT17_HUMAN Zinc finger and BTB domain-containing protein 17 OS=Homo sapiens OX=9606 GN=ZBTB17 PE=1 SV=3	6.0011	87872	F215810.dat	Q25499_MS19-036_T2_R15	23	1.1	1	1	1	5	0	0	0	0	0	0	0	0	0	0	0	0	0	0	0	0	0	0	0	0	0	0	0	0	0	0	0	0	0	0	0	0	0	1	0	0	0	0
ATRIP_HUMAN	sp|Q8WXE1|ATRIP_HUMAN ATR-interacting protein OS=Homo sapiens OX=9606 GN=ATRIP PE=1 SV=1	5.89616	85783	F215852.dat	Q25538_MS19-036_T3_R12	23	2	1	1	1	1	0	0	0	0	0	0	0	0	0	0	0	0	0	0	0	0	0	0	0	0	0	0	0	0	0	0	0	0	0	0	0	0	0	0	0	0	0	0
NEU1B_HUMAN	sp|A8MQ27|NEU1B_HUMAN E3 ubiquitin-protein ligase NEURL1B OS=Homo sapiens OX=9606 GN=NEURL1B PE=1 SV=1	8.7584	59232	F215841.dat	Q25527_MS19-036_T3_R16	23	1.4	1	1	1	1	0	0	0	0	0	0	0	0	0	0	0	0	0	0	0	0	0	0	0	0	0	0	0	0	0	0	0	0	0	0	0	0	0	0	0	0	0	0
ANKH1_HUMAN	sp|Q8IWZ3|ANKH1_HUMAN Ankyrin repeat and KH domain-containing protein 1 OS=Homo sapiens OX=9606 GN=ANKHD1 PE=1 SV=1	5.46125	269291	F215721.dat	Q25484_MS19-036_T2_R14	23	0.3	1	1	1	0	0	0	0	0	0	0	0	0	0	0	0	0	0	0	0	0	0	0	0	0	0	0	0	0	0	0	0	0	0	0	0	0	0	0	0	0	0	0
PXL2B_HUMAN	sp|Q8TBF2|PXL2B_HUMAN Prostamide/prostaglandin F synthase OS=Homo sapiens OX=9606 GN=PRXL2B PE=1 SV=1	6.20275	21209	F215868.dat	Q25541_MS19-036_T1(Baseline)_NR3	23	3.5	1	1	1	1	0	0	0	0	0	0	0	0	0	0	0	0	0	0	0	0	0	0	0	0	0	0	0	0	0	0	0	0	0	0	0	0	0	0	0	0	0	0
TTC12_HUMAN	sp|Q9H892|TTC12_HUMAN Tetratricopeptide repeat protein 12 OS=Homo sapiens OX=9606 GN=TTC12 PE=1 SV=2	5.5046	78705	F215817.dat	Q25503_MS19-036_T2_NR10	23	1	1	1	1	1	0	0	0	0	0	0	0	0	0	0	0	0	0	0	0	0	0	0	0	0	0	0	0	0	0	0	0	0	0	0	0	0	0	0	0	0	0	1
RGS2_HUMAN	sp|P41220|RGS2_HUMAN Regulator of G-protein signaling 2 OS=Homo sapiens OX=9606 GN=RGS2 PE=1 SV=1	9.05309	24366	F215820.dat	Q25506_MS19-036_T4_R4	23	3.3	1	1	1	1	0	0	0	0	0	0	0	0	0	0	0	0	0	0	0	0	0	0	0	0	0	0	0	0	0	0	0	0	0	0	0	0	0	0	0	0	0	0
CUTC_HUMAN	sp|Q9NTM9|CUTC_HUMAN Copper homeostasis protein cutC homolog OS=Homo sapiens OX=9606 GN=CUTC PE=1 SV=1	8.46693	29322	F215812.dat	Q25500_MS19-036_T1(Baseline)_R2	23	2.6	1	1	1	5	0	0	0	0	0	0	0	0	0	0	0	0	0	0	0	1	0	0	0	0	0	1	0	0	0	0	0	0	0	0	0	0	0	0	2	0	0	0
CI170_HUMAN	sp|A2RU37|CI170_HUMAN Uncharacterized protein C9orf170 OS=Homo sapiens OX=9606 GN=C9orf170 PE=2 SV=1	10.5764	13361	F215849.dat	Q25535_MS19-036_T2_R10	23	5.8	1	1	1	1	0	0	0	0	0	0	0	0	0	0	0	0	0	0	0	0	0	0	0	0	0	0	0	0	0	0	0	0	0	0	0	0	0	0	0	0	0	0
IBP7_HUMAN	sp|Q16270|IBP7_HUMAN Insulin-like growth factor-binding protein 7 OS=Homo sapiens OX=9606 GN=IGFBP7 PE=1 SV=1	8.24856	29111	F215947.dat	Q25572_MS19-036_T4_R10	23	4.6	1	1	1	2	0	0	0	0	0	0	0	0	0	0	0	0	0	0	0	0	0	0	0	0	0	0	0	0	0	0	0	0	0	0	0	0	0	0	0	0	0	0
PTBP1_HUMAN	sp|P26599|PTBP1_HUMAN Polypyrimidine tract-binding protein 1 OS=Homo sapiens OX=9606 GN=PTBP1 PE=1 SV=1	9.21947	57186	F215927.dat	Q25570_MS19-036_T4_R11	23	1.3	1	1	1	1	0	0	0	0	0	0	0	0	0	0	0	0	0	0	0	0	0	0	0	0	0	0	0	0	0	0	0	0	0	0	0	0	0	0	0	0	0	0
DTNA_HUMAN	sp|Q9Y4J8|DTNA_HUMAN Dystrobrevin alpha OS=Homo sapiens OX=9606 GN=DTNA PE=1 SV=2	6.42552	83848	F215762.dat	Q25492_MS19-036_T3_R17	23	1.1	1	1	1	1	0	0	0	0	0	0	0	0	0	0	0	0	0	0	0	0	0	0	0	0	0	0	0	0	0	0	1	0	0	0	0	0	0	0	0	0	0	0
PDZD9_HUMAN	sp|Q8IXQ8|PDZD9_HUMAN PDZ domain-containing protein 9 OS=Homo sapiens OX=9606 GN=PDZD9 PE=2 SV=2	8.98939	29886	F215791.dat	Q25495_MS19-036_T4_NR16	23	3.4	1	1	1	4	0	0	0	0	0	0	0	0	0	0	0	0	0	0	0	0	0	0	1	0	0	0	0	0	0	0	0	0	0	1	0	0	0	0	0	0	0	0
GP119_HUMAN	sp|Q8TDV5|GP119_HUMAN Glucose-dependent insulinotropic receptor OS=Homo sapiens OX=9606 GN=GPR119 PE=1 SV=1	9.09674	36864	F215845.dat	Q25531_MS19-036_T3_R10	23	3	1	1	1	1	0	0	0	0	0	0	0	0	0	0	0	0	0	0	0	0	0	0	0	0	0	0	0	0	0	0	0	0	0	0	0	0	0	0	0	0	0	0
DAG1_HUMAN	sp|Q14118|DAG1_HUMAN Dystroglycan OS=Homo sapiens OX=9606 GN=DAG1 PE=1 SV=2	8.708	97381	F215875.dat	Q25545_MS19-036_T3_NR13	23	0.9	1	1	1	4	0	0	0	0	0	0	0	0	0	0	0	0	0	0	0	0	0	0	0	0	0	0	0	0	0	0	0	0	0	0	0	0	0	0	0	0	0	0
CENPA_HUMAN	sp|P49450|CENPA_HUMAN Histone H3-like centromeric protein A OS=Homo sapiens OX=9606 GN=CENPA PE=1 SV=1	11.7132	15981	F215895.dat	Q25553_MS19-036_T3_NR16	23	5	1	1	1	1	0	0	0	0	0	0	0	0	0	0	0	0	0	0	0	0	0	0	0	0	0	0	0	0	0	0	0	0	0	0	0	0	0	0	0	0	0	0
JPH2_HUMAN	sp|Q9BR39|JPH2_HUMAN Junctophilin-2 OS=Homo sapiens OX=9606 GN=JPH2 PE=1 SV=2	8.8203	74176	F215832.dat	Q25518_MS19-036_T3_R6	23	1	1	1	1	3	0	0	0	0	0	0	0	0	0	0	0	0	0	0	0	0	0	0	0	0	0	0	0	0	0	0	0	0	0	0	0	0	0	0	0	0	0	0
DHRSX_HUMAN	sp|Q8N5I4|DHRSX_HUMAN Dehydrogenase/reductase SDR family member on chromosome X OS=Homo sapiens OX=9606 GN=DHRSX PE=1 SV=2	9.097	36420	F215828.dat	Q25514_MS19-036_T4_R9	23	2.1	1	1	1	2	0	0	0	0	0	0	0	0	0	0	0	0	0	0	0	0	0	0	0	0	0	0	0	0	0	0	0	0	0	0	0	0	0	0	0	0	0	0
TRIB3_HUMAN	sp|Q96RU7|TRIB3_HUMAN Tribbles homolog 3 OS=Homo sapiens OX=9606 GN=TRIB3 PE=1 SV=2	8.34241	39553	F215849.dat	Q25535_MS19-036_T2_R10	23	2.5	1	1	1	2	0	0	0	0	0	0	0	0	0	0	0	0	0	0	1	0	0	0	0	0	0	0	0	0	0	0	0	0	0	0	0	0	0	0	0	0	0	0
NRAP_HUMAN	sp|Q86VF7|NRAP_HUMAN Nebulin-related-anchoring protein OS=Homo sapiens OX=9606 GN=NRAP PE=1 SV=2	9.24217	196950	F215687.dat	Q25479_MS19-036_T1(Baseline)_NR9	23	0.4	1	1	1	1	0	0	0	0	0	0	0	0	0	0	0	0	0	0	1	0	0	0	0	0	0	0	0	0	0	0	0	0	0	0	0	0	0	0	0	0	0	0
ELL2_HUMAN	sp|O00472|ELL2_HUMAN RNA polymerase II elongation factor ELL2 OS=Homo sapiens OX=9606 GN=ELL2 PE=1 SV=2	9.09081	72280	F215975.dat	Q25578_MS19-036_T3_NR14	23	1.2	1	1	1	1	0	0	0	0	0	0	0	0	0	0	0	0	0	0	0	0	0	0	0	0	0	0	0	0	0	0	0	0	0	0	0	0	0	0	0	0	0	0
NAR4_HUMAN	sp|Q93070|NAR4_HUMAN Ecto-ADP-ribosyltransferase 4 OS=Homo sapiens OX=9606 GN=ART4 PE=2 SV=2	9.31143	35854	F215671.dat	Q25470_MS19-036_T1(Baseline)_NR17	23	2.2	1	1	1	1	0	0	0	0	0	1	0	0	0	0	0	0	0	0	0	0	0	0	0	0	0	0	0	0	0	0	0	0	0	0	0	0	0	0	0	0	0	0
CTR4_HUMAN	sp|O43246|CTR4_HUMAN Cationic amino acid transporter 4 OS=Homo sapiens OX=9606 GN=SLC7A4 PE=2 SV=3	6.5937	68224	F215980.dat	Q25581_MS19-036_T4_NR5	23	1.1	1	1	1	1	0	0	0	0	0	0	0	0	0	0	0	0	0	0	0	0	0	0	0	0	0	0	0	0	0	0	0	0	0	0	0	0	0	0	0	0	0	0
RRAGA_HUMAN	sp|Q7L523|RRAGA_HUMAN Ras-related GTP-binding protein A OS=Homo sapiens OX=9606 GN=RRAGA PE=1 SV=1	7.61956	36543	F215906.dat	Q25561_MS19-036_T4_NR2	23	3.8	1	1	1	3	0	0	0	0	0	0	0	0	0	0	0	0	0	0	0	0	0	0	0	0	0	0	0	0	0	0	0	0	0	0	0	0	0	0	0	0	0	0
ZIM3_HUMAN	sp|Q96PE6|ZIM3_HUMAN Zinc finger imprinted 3 OS=Homo sapiens OX=9606 GN=ZIM3 PE=2 SV=1	9.42537	54463	F215704.dat	Q25483_MS19-036_T4_R17	23	1.5	1	1	1	1	0	0	0	0	0	0	0	0	0	0	0	0	0	0	0	0	0	0	1	0	0	0	0	0	0	0	0	0	0	0	0	0	0	0	0	0	0	0
VWA2_HUMAN	sp|Q5GFL6|VWA2_HUMAN von Willebrand factor A domain-containing protein 2 OS=Homo sapiens OX=9606 GN=VWA2 PE=1 SV=1	8.37885	81960	F215895.dat	Q25553_MS19-036_T3_NR16	23	2	1	1	1	1	0	0	0	0	0	0	0	0	0	0	0	0	0	0	0	0	0	0	0	0	0	0	0	0	0	0	0	0	0	0	0	0	0	0	0	0	0	0
PSMD1_HUMAN	sp|Q99460|PSMD1_HUMAN 26S proteasome non-ATPase regulatory subunit 1 OS=Homo sapiens OX=9606 GN=PSMD1 PE=1 SV=2	5.24605	105769	F215851.dat	Q25537_MS19-036_T3_R9	23	0.7	1	1	1	1	0	0	0	0	0	0	0	0	0	0	0	0	0	0	0	0	0	0	0	0	0	0	0	0	0	0	0	0	0	0	0	0	0	0	0	0	0	0
ARSH_HUMAN	sp|Q5FYA8|ARSH_HUMAN Arylsulfatase H OS=Homo sapiens OX=9606 GN=ARSH PE=2 SV=1	8.48329	63484	F215733.dat	Q25485_MS19-036_T1(Baseline)_NR14	23	1.2	1	1	1	1	0	0	0	0	0	0	0	0	0	0	0	0	0	0	0	0	0	0	0	0	1	0	0	0	0	0	0	0	0	0	0	0	0	0	0	0	0	0
APCL_HUMAN	sp|O95996|APCL_HUMAN Adenomatous polyposis coli protein 2 OS=Homo sapiens OX=9606 GN=APC2 PE=1 SV=1	9.08238	243799	F215834.dat	Q25520_MS19-036_T2_R17	23	0.5	1	1	1	1	0	0	0	0	0	0	0	0	0	0	0	0	0	0	0	0	0	0	0	0	0	0	0	0	0	0	0	0	0	0	0	0	0	0	0	0	0	0
FSBP_HUMAN	sp|O95073|FSBP_HUMAN Fibrinogen silencer-binding protein OS=Homo sapiens OX=9606 GN=FSBP PE=1 SV=1	6.61685	34746	F215674.dat	Q25473_MS19-036_T1(Baseline)_NR1	23	3	1	1	1	1	0	0	0	0	0	0	0	0	1	0	0	0	0	0	0	0	0	0	0	0	0	0	0	0	0	0	0	0	0	0	0	0	0	0	0	0	0	0
SC11B_HUMAN	sp|P0C7V7|SC11B_HUMAN Putative signal peptidase complex catalytic subunit SEC11B OS=Homo sapiens OX=9606 GN=SEC11B PE=5 SV=1	9.65928	19147	F215875.dat	Q25545_MS19-036_T3_NR13	23	4.8	1	1	1	2	0	0	0	0	0	0	0	0	0	0	0	0	0	0	0	0	0	0	0	0	0	0	0	0	0	0	0	0	0	0	0	0	0	0	0	0	0	0
SMAD4_HUMAN	sp|Q13485|SMAD4_HUMAN Mothers against decapentaplegic homolog 4 OS=Homo sapiens OX=9606 GN=SMAD4 PE=1 SV=1	6.49898	60401	F215820.dat	Q25506_MS19-036_T4_R4	23	2.2	1	1	1	1	0	0	0	0	0	0	0	0	0	0	0	0	0	0	0	0	0	0	0	0	0	0	0	0	0	0	0	0	0	0	0	0	0	0	0	0	0	0
ITSN1_HUMAN	sp|Q15811|ITSN1_HUMAN Intersectin-1 OS=Homo sapiens OX=9606 GN=ITSN1 PE=1 SV=3	7.75553	195300	F215688.dat	Q25480_MS19-036_T1(Baseline)_R3	23	0.5	1	1	1	1	0	0	0	0	0	0	0	0	0	0	0	0	0	0	0	1	0	0	0	0	0	0	0	0	0	0	0	0	0	0	0	0	0	0	0	0	0	0
MYO10_HUMAN	sp|Q9HD67|MYO10_HUMAN Unconventional myosin-X OS=Homo sapiens OX=9606 GN=MYO10 PE=1 SV=3	5.85281	237198	F215975.dat	Q25578_MS19-036_T3_NR14	23	0.5	1	1	1	1	0	0	0	0	0	0	0	0	0	0	0	0	0	0	0	0	0	0	0	0	0	0	0	0	0	0	0	0	0	0	0	0	0	0	0	0	0	0
CHST5_HUMAN	sp|Q9GZS9|CHST5_HUMAN Carbohydrate sulfotransferase 5 OS=Homo sapiens OX=9606 GN=CHST5 PE=2 SV=3	10.0739	46131	F215923.dat	Q25566_MS19-036_T2_NR16	23	1.7	1	1	1	5	0	0	0	0	0	0	0	0	0	0	0	0	0	0	0	0	0	0	0	0	0	0	0	0	1	0	0	0	0	0	0	0	0	0	0	0	0	0
MYBB_HUMAN	sp|P10244|MYBB_HUMAN Myb-related protein B OS=Homo sapiens OX=9606 GN=MYBL2 PE=1 SV=1	6.42654	78715	F215691.dat	Q25482_MS19-036_T1(Baseline)_NR2	23	1.6	1	1	1	1	0	0	0	0	0	0	0	0	0	0	0	0	0	0	0	0	0	1	0	0	0	0	0	0	0	0	0	0	0	0	0	0	0	0	0	0	0	0
CO4A6_HUMAN	sp|Q14031|CO4A6_HUMAN Collagen alpha-6(IV) chain OS=Homo sapiens OX=9606 GN=COL4A6 PE=1 SV=3	9.31005	163704	F215733.dat	Q25485_MS19-036_T1(Baseline)_NR14	23	0.5	1	1	1	1	0	0	0	0	0	0	0	0	0	0	0	0	0	0	0	0	0	0	0	0	1	0	0	0	0	0	0	0	0	0	0	0	0	0	0	0	0	0
CAD18_HUMAN	sp|Q13634|CAD18_HUMAN Cadherin-18 OS=Homo sapiens OX=9606 GN=CDH18 PE=2 SV=1	4.97763	88018	F215851.dat	Q25537_MS19-036_T3_R9	23	1.3	1	1	1	1	0	0	0	0	0	0	0	0	0	0	0	0	0	0	0	0	0	0	0	0	0	0	0	0	0	0	0	0	0	0	0	0	0	0	0	0	0	0
NEC1_HUMAN	sp|P29120|NEC1_HUMAN Neuroendocrine convertase 1 OS=Homo sapiens OX=9606 GN=PCSK1 PE=1 SV=2	5.65504	84099	F215721.dat	Q25484_MS19-036_T2_R14	23	0.9	1	1	1	1	0	0	0	0	0	0	0	0	0	0	0	0	0	0	0	0	0	0	0	1	0	0	0	0	0	0	0	0	0	0	0	0	0	0	0	0	0	0
RS3A_HUMAN	sp|P61247|RS3A_HUMAN 40S ribosomal protein S3a OS=Homo sapiens OX=9606 GN=RPS3A PE=1 SV=2	9.75211	29926	F215843.dat	Q25529_MS19-036_T1(Baseline)_NR4	23	2.7	1	1	1	2	0	0	0	0	0	0	0	0	0	0	0	0	0	0	0	1	0	0	0	0	0	0	0	0	0	0	0	0	0	0	0	0	0	0	0	0	0	0
GRM2A_HUMAN	sp|Q8IUY3|GRM2A_HUMAN GRAM domain-containing protein 2A OS=Homo sapiens OX=9606 GN=GRAMD2A PE=1 SV=2	8.73427	40223	F215823.dat	Q25509_MS19-036_T2_R2	23	3.1	1	1	1	1	0	0	0	0	0	0	0	0	0	0	0	0	0	0	0	0	0	0	0	0	0	0	0	0	0	0	0	0	0	0	0	0	0	0	0	0	0	0
MENT_HUMAN	sp|Q9BUN1|MENT_HUMAN Protein MENT OS=Homo sapiens OX=9606 GN=MENT PE=2 SV=1	8.96419	36746	F215980.dat	Q25581_MS19-036_T4_NR5	23	4.4	1	1	1	1	0	0	0	0	0	0	0	0	0	0	0	0	0	0	0	0	0	0	0	0	0	0	0	0	0	0	0	0	0	0	0	0	0	0	0	0	0	0
NEK9_HUMAN	sp|Q8TD19|NEK9_HUMAN Serine/threonine-protein kinase Nek9 OS=Homo sapiens OX=9606 GN=NEK9 PE=1 SV=2	5.50751	107100	F215793.dat	Q25496_MS19-036_T3_R18	23	0.7	1	1	1	2	0	0	0	0	0	0	0	0	0	0	0	0	0	0	0	0	0	0	0	0	0	0	0	0	0	0	0	0	0	0	1	0	0	0	0	0	0	0
EHD2_HUMAN	sp|Q9NZN4|EHD2_HUMAN EH domain-containing protein 2 OS=Homo sapiens OX=9606 GN=EHD2 PE=1 SV=2	6.02804	61123	F215850.dat	Q25536_MS19-036_T3_R15	23	1.3	1	1	1	1	0	0	0	0	0	0	0	0	0	0	0	0	0	0	0	0	0	0	0	0	0	0	0	0	0	0	0	0	0	0	0	0	0	0	0	0	0	0
CC115_HUMAN	sp|Q96NT0|CC115_HUMAN Coiled-coil domain-containing protein 115 OS=Homo sapiens OX=9606 GN=CCDC115 PE=1 SV=1	6.44382	19748	F215922.dat	Q25565_MS19-036_T3_NR10	23	3.9	1	1	1	3	0	0	0	0	0	0	0	0	0	0	0	0	0	0	0	0	0	0	0	0	0	0	0	0	0	0	0	0	0	0	0	0	0	0	0	0	0	0
VPS54_HUMAN	sp|Q9P1Q0|VPS54_HUMAN Vacuolar protein sorting-associated protein 54 OS=Homo sapiens OX=9606 GN=VPS54 PE=1 SV=2	6.10267	110519	F215874.dat	Q25544_MS19-036_T4_NR8	23	1	1	1	1	1	0	0	0	0	0	0	0	0	0	0	0	0	0	0	0	0	0	0	0	0	0	0	0	0	0	0	0	0	0	0	0	0	0	0	0	0	0	0
CYBR1_HUMAN	sp|Q53TN4|CYBR1_HUMAN Cytochrome b reductase 1 OS=Homo sapiens OX=9606 GN=CYBRD1 PE=1 SV=1	8.88634	31621	F215904.dat	Q25560_MS19-036_T2_R8	23	3.5	1	1	1	1	0	0	0	0	0	0	0	0	0	0	0	0	0	0	0	0	0	0	0	0	0	0	0	0	0	0	0	0	0	0	0	0	0	0	0	0	0	0
ZC12D_HUMAN	sp|A2A288|ZC12D_HUMAN Probable ribonuclease ZC3H12D OS=Homo sapiens OX=9606 GN=ZC3H12D PE=1 SV=3	8.91727	58042	F215881.dat	Q25549_MS19-036_T4_NR4	23	1.7	1	1	1	1	0	0	0	0	0	0	0	0	0	0	0	0	0	0	0	0	0	0	0	0	0	0	0	0	0	0	0	0	0	0	0	0	0	0	0	0	0	0
B4GN1_HUMAN	sp|Q00973|B4GN1_HUMAN Beta-1,4 N-acetylgalactosaminyltransferase 1 OS=Homo sapiens OX=9606 GN=B4GALNT1 PE=1 SV=2	8.93342	58846	F215888.dat	Q25551_MS19-036_T4_R5	23	1.3	1	1	1	1	0	0	0	0	0	0	0	0	0	0	0	0	0	0	0	0	0	0	0	0	0	0	0	0	0	0	0	0	0	0	0	0	0	0	0	0	0	0
GCP2_HUMAN	sp|Q9BSJ2|GCP2_HUMAN Gamma-tubulin complex component 2 OS=Homo sapiens OX=9606 GN=TUBGCP2 PE=1 SV=2	6.38064	102469	F215760.dat	Q25490_MS19-036_T4_NR17	23	1.1	1	1	1	1	0	0	0	0	0	0	0	0	0	0	0	0	0	0	0	0	0	0	0	0	0	0	0	0	1	0	0	0	0	0	0	0	0	0	0	0	0	0
K154L_HUMAN	sp|Q6ZVL6|K154L_HUMAN UPF0606 protein KIAA1549L OS=Homo sapiens OX=9606 GN=KIAA1549L PE=2 SV=2	8.31736	198876	F215936.dat	Q25571_MS19-036_T1(Baseline)_NR5	23	0.4	1	1	1	1	0	0	0	0	0	0	0	0	0	0	0	0	0	0	0	0	0	0	0	0	0	0	0	0	0	0	0	0	0	0	0	0	0	0	0	0	0	0
KKCC2_HUMAN	sp|Q96RR4|KKCC2_HUMAN Calcium/calmodulin-dependent protein kinase kinase 2 OS=Homo sapiens OX=9606 GN=CAMKK2 PE=1 SV=2	6.25193	64705	F215810.dat	Q25499_MS19-036_T2_R15	23	1.5	1	1	1	1	0	0	0	0	0	0	0	0	0	0	0	0	0	0	0	0	0	0	0	0	0	0	0	0	0	0	0	0	0	0	0	0	0	1	0	0	0	0
ZN559_HUMAN	sp|Q9BR84|ZN559_HUMAN Zinc finger protein 559 OS=Homo sapiens OX=9606 GN=ZNF559 PE=1 SV=1	8.89928	62277	F215830.dat	Q25516_MS19-036_T1(Baseline)_NR7	23	2	1	1	1	1	0	0	0	0	0	0	0	0	0	0	0	0	0	0	0	0	0	0	0	0	0	0	0	0	0	0	0	0	0	0	0	0	0	0	0	0	0	0
RAB3A_HUMAN	sp|P20336|RAB3A_HUMAN Ras-related protein Rab-3A OS=Homo sapiens OX=9606 GN=RAB3A PE=1 SV=1	4.85485	24968	F215817.dat	Q25503_MS19-036_T2_NR10	23	3.2	1	1	1	1	0	0	0	0	0	0	0	0	0	0	0	0	0	0	0	0	0	0	0	0	0	0	0	0	0	0	0	0	0	0	0	0	0	0	0	0	0	1
MDFIC_HUMAN	sp|Q9P1T7|MDFIC_HUMAN MyoD family inhibitor domain-containing protein OS=Homo sapiens OX=9606 GN=MDFIC PE=1 SV=2	5.0861	25771	F215831.dat	Q25517_MS19-036_T2_R4	23	3.3	1	1	1	1	0	0	0	0	0	0	0	0	0	0	0	0	0	0	0	0	0	0	0	0	0	0	0	0	0	0	0	0	0	0	0	0	0	0	0	0	0	0
RUSD4_HUMAN	sp|Q96CM3|RUSD4_HUMAN Mitochondrial RNA pseudouridine synthase RPUSD4 OS=Homo sapiens OX=9606 GN=RPUSD4 PE=1 SV=1	9.89907	42178	F215827.dat	Q25513_MS19-036_T2_R11	23	1.9	1	1	1	5	0	0	0	0	0	0	0	0	0	0	0	0	0	1	0	0	0	0	0	0	0	0	0	0	0	0	0	0	0	0	1	0	0	0	0	1	0	0
JPH3_HUMAN	sp|Q8WXH2|JPH3_HUMAN Junctophilin-3 OS=Homo sapiens OX=9606 GN=JPH3 PE=2 SV=2	9.42854	81419	F215783.dat	Q25494_MS19-036_T1(Baseline)_R13	23	0.9	1	1	1	1	0	0	0	0	0	0	0	0	0	0	0	0	0	0	0	0	0	0	0	0	0	0	0	0	0	0	0	0	1	0	0	0	0	0	0	0	0	0
RIMKB_HUMAN	sp|Q9ULI2|RIMKB_HUMAN Beta-citrylglutamate synthase B OS=Homo sapiens OX=9606 GN=RIMKLB PE=2 SV=2	5.67216	42436	F215850.dat	Q25536_MS19-036_T3_R15	23	1.8	1	1	1	1	0	0	0	0	0	0	0	0	0	0	0	0	0	0	0	0	0	0	0	0	0	0	0	0	0	0	0	0	0	0	0	0	0	0	0	0	0	0
TP8L2_HUMAN	sp|Q6P589|TP8L2_HUMAN Tumor necrosis factor alpha-induced protein 8-like protein 2 OS=Homo sapiens OX=9606 GN=TNFAIP8L2 PE=1 SV=1	8.53946	20543	F215972.dat	Q25576_MS19-036_T4_R13	23	3.8	1	1	1	0	0	0	0	0	0	0	0	0	0	0	0	0	0	0	0	0	0	0	0	0	0	0	0	0	0	0	0	0	0	0	0	0	0	0	0	0	0	0
BEST3_HUMAN	sp|Q8N1M1|BEST3_HUMAN Bestrophin-3 OS=Homo sapiens OX=9606 GN=BEST3 PE=2 SV=1	6.12807	76058	F215721.dat	Q25484_MS19-036_T2_R14	23	1.2	1	1	1	1	0	0	0	0	0	0	0	0	0	0	0	0	0	0	0	0	0	0	0	1	0	0	0	0	0	0	0	0	0	0	0	0	0	0	0	0	0	0
PCY1A_HUMAN	sp|P49585|PCY1A_HUMAN Choline-phosphate cytidylyltransferase A OS=Homo sapiens OX=9606 GN=PCYT1A PE=1 SV=2	6.81652	41705	F215685.dat	Q25477_MS19-036_T4_NR18	23	2.7	1	1	1	1	0	0	0	0	0	0	0	0	0	0	0	0	1	0	0	0	0	0	0	0	0	0	0	0	0	0	0	0	0	0	0	0	0	0	0	0	0	0
ZN536_HUMAN	sp|O15090|ZN536_HUMAN Zinc finger protein 536 OS=Homo sapiens OX=9606 GN=ZNF536 PE=1 SV=3	6.86078	141328	F215832.dat	Q25518_MS19-036_T3_R6	22	0.8	1	1	1	1	0	0	0	0	0	0	0	0	0	0	0	0	0	0	0	0	0	0	0	0	0	0	0	0	0	0	0	0	0	0	0	0	0	0	0	0	0	0
TMM81_HUMAN	sp|Q6P7N7|TMM81_HUMAN Transmembrane protein 81 OS=Homo sapiens OX=9606 GN=TMEM81 PE=2 SV=1	8.92013	28450	F215757.dat	Q25487_MS19-036_T1(Baseline)_R11	22	2.7	1	1	1	1	0	0	0	0	0	0	0	0	0	0	0	0	0	0	0	0	0	0	0	0	0	1	0	0	0	0	0	0	0	0	0	0	0	0	0	0	0	0
S15A1_HUMAN	Solute carrier family 15 member 1 OS=Homo sapiens OX=9606 GN=SLC15A1 PE=2 SV=1	8.72016	78754	F215758.dat	Q25488_MS19-036_T4_R7	22	1	1	1	1	1	0	0	0	0	0	0	0	0	0	0	0	0	0	0	0	0	0	0	0	0	0	0	1	0	0	0	0	0	0	0	0	0	0	0	0	0	0	0
DMD_HUMAN	sp|P11532|DMD_HUMAN Dystrophin OS=Homo sapiens OX=9606 GN=DMD PE=1 SV=3	5.63679	426484	F215881.dat	Q25549_MS19-036_T4_NR4	22	0.3	1	1	1	1	0	0	0	0	0	0	0	0	0	0	0	0	0	0	0	0	0	0	0	0	0	0	0	0	0	0	0	0	0	0	0	0	0	0	0	0	0	0
C163B_HUMAN	sp|Q9NR16|C163B_HUMAN Scavenger receptor cysteine-rich type 1 protein M160 OS=Homo sapiens OX=9606 GN=CD163L1 PE=1 SV=2	5.4429	159135	F215832.dat	Q25518_MS19-036_T3_R6	22	0.5	1	1	1	1	0	0	0	0	0	0	0	0	0	0	0	0	0	0	0	0	0	0	0	0	0	0	0	0	0	0	0	0	0	0	0	0	0	0	0	0	0	0
CLCN4_HUMAN	sp|P51793|CLCN4_HUMAN H(+)/Cl(-) exchange transporter 4 OS=Homo sapiens OX=9606 GN=CLCN4 PE=1 SV=2	6.42501	84862	F215850.dat	Q25536_MS19-036_T3_R15	22	0.9	1	1	1	1	0	0	0	0	0	0	0	0	0	0	0	0	0	0	0	0	0	0	0	0	0	0	0	0	0	0	0	0	0	0	0	0	0	0	0	0	0	0
S12A5_HUMAN	sp|Q9H2X9|S12A5_HUMAN Solute carrier family 12 member 5 OS=Homo sapiens OX=9606 GN=SLC12A5 PE=1 SV=3	6.29047	126102	F215842.dat	Q25528_MS19-036_T1(Baseline)_R4	22	0.8	1	1	1	1	0	0	0	0	0	0	0	0	0	0	0	0	0	0	0	0	0	0	0	0	0	0	0	0	0	0	0	0	0	0	0	0	0	0	0	0	0	0
TMF1_HUMAN	sp|P82094|TMF1_HUMAN TATA element modulatory factor OS=Homo sapiens OX=9606 GN=TMF1 PE=1 SV=2	4.88179	122767	F215668.dat	Q25467_MS19-036_T4_R18	22	0.9	1	1	1	1	0	0	1	0	0	0	0	0	0	0	0	0	0	0	0	0	0	0	0	0	0	0	0	0	0	0	0	0	0	0	0	0	0	0	0	0	0	0
NUP93_HUMAN	sp|Q8N1F7|NUP93_HUMAN Nuclear pore complex protein Nup93 OS=Homo sapiens OX=9606 GN=NUP93 PE=1 SV=2	5.50184	93430	F216014.dat	Q25574_MS19-036_T3_NR6	22	1	1	1	1	2	0	0	0	0	0	0	0	0	0	0	0	0	0	0	0	0	0	0	0	0	0	0	0	0	0	0	0	0	0	0	0	0	0	0	0	0	0	0
MIEAP_HUMAN	sp|Q8TC71|MIEAP_HUMAN Mitochondria-eating protein OS=Homo sapiens OX=9606 GN=SPATA18 PE=1 SV=1	8.92642	61071	F215927.dat	Q25570_MS19-036_T4_R11	22	1.3	1	1	1	2	0	0	0	0	0	0	0	0	0	0	0	0	0	0	0	0	0	0	0	0	0	0	0	0	0	0	0	0	0	0	0	0	0	0	0	0	0	0
ANO8_HUMAN	sp|Q9HCE9|ANO8_HUMAN Anoctamin-8 OS=Homo sapiens OX=9606 GN=ANO8 PE=1 SV=3	5.61706	135949	F215674.dat	Q25473_MS19-036_T1(Baseline)_NR1	22	0.7	1	1	1	1	0	0	0	0	0	0	0	0	1	0	0	0	0	0	0	0	0	0	0	0	0	0	0	0	0	0	0	0	0	0	0	0	0	0	0	0	0	0
CIP2A_HUMAN	sp|Q8TCG1|CIP2A_HUMAN Protein CIP2A OS=Homo sapiens OX=9606 GN=CIP2A PE=1 SV=2	5.84969	102121	F215877.dat	Q25547_MS19-036_T3_NR12	22	1.1	1	1	1	1	0	0	0	0	0	0	0	0	0	0	0	0	0	0	0	0	0	0	0	0	0	0	0	0	0	0	0	0	0	0	0	0	0	0	0	0	0	0
N4BP2_HUMAN	sp|Q86UW6|N4BP2_HUMAN NEDD4-binding protein 2 OS=Homo sapiens OX=9606 GN=N4BP2 PE=1 SV=2	5.11069	198676	F215984.dat	Q25584_MS19-036_T4_R8	22	0.4	1	1	1	15	0	0	0	0	0	0	0	0	0	0	0	0	0	0	0	0	0	0	0	0	0	0	0	0	0	0	0	1	0	0	0	0	0	0	0	1	0	0
TLR7_HUMAN	sp|Q9NYK1|TLR7_HUMAN Toll-like receptor 7 OS=Homo sapiens OX=9606 GN=TLR7 PE=2 SV=1	8.51278	120845	F215758.dat	Q25488_MS19-036_T4_R7	22	0.8	1	1	1	1	0	0	0	0	0	0	0	0	0	0	0	0	0	0	0	0	0	0	0	0	0	0	1	0	0	0	0	0	0	0	0	0	0	0	0	0	0	0
CREL1_HUMAN	sp|Q96HD1|CREL1_HUMAN Cysteine-rich with EGF-like domain protein 1 OS=Homo sapiens OX=9606 GN=CRELD1 PE=1 SV=3	4.81237	45409	F215975.dat	Q25578_MS19-036_T3_NR14	22	1.9	1	1	1	1	0	0	0	0	0	0	0	0	0	0	0	0	0	0	0	0	0	0	0	0	0	0	0	0	0	0	0	0	0	0	0	0	0	0	0	0	0	0
IKZF2_HUMAN	sp|Q9UKS7|IKZF2_HUMAN Zinc finger protein Helios OS=Homo sapiens OX=9606 GN=IKZF2 PE=1 SV=2	6.29727	59535	F215673.dat	Q25472_MS19-036_T1(Baseline)_R5	22	1.5	1	1	1	1	0	0	0	0	0	0	0	1	0	0	0	0	0	0	0	0	0	0	0	0	0	0	0	0	0	0	0	0	0	0	0	0	0	0	0	0	0	0
ZN440_HUMAN	sp|Q8IYI8|ZN440_HUMAN Zinc finger protein 440 OS=Homo sapiens OX=9606 GN=ZNF440 PE=1 SV=1	9.33305	69061	F215672.dat	Q25471_MS19-036_T3_R8	22	1.5	1	1	1	1	0	0	0	0	0	0	1	0	0	0	0	0	0	0	0	0	0	0	0	0	0	0	0	0	0	0	0	0	0	0	0	0	0	0	0	0	0	0
MTSS1_HUMAN	sp|O43312|MTSS1_HUMAN Protein MTSS 1 OS=Homo sapiens OX=9606 GN=MTSS1 PE=1 SV=2	6.47224	82200	F215760.dat	Q25490_MS19-036_T4_NR17	22	0.9	1	1	1	1	0	0	0	0	0	0	0	0	0	0	0	0	0	0	0	0	0	0	0	0	0	0	0	0	1	0	0	0	0	0	0	0	0	0	0	0	0	0
IBTK_HUMAN	sp|Q9P2D0|IBTK_HUMAN Inhibitor of Bruton tyrosine kinase OS=Homo sapiens OX=9606 GN=IBTK PE=1 SV=3	7.79459	150432	F215758.dat	Q25488_MS19-036_T4_R7	22	0.7	1	1	1	2	0	0	0	0	0	0	0	0	0	0	0	0	0	0	0	0	0	0	0	0	0	0	1	0	0	0	0	0	0	0	0	0	0	0	0	0	0	0
ACPH_HUMAN	sp|P13798|ACPH_HUMAN Acylamino-acid-releasing enzyme OS=Homo sapiens OX=9606 GN=APEH PE=1 SV=4	5.29001	81173	F215848.dat	Q25534_MS19-036_T3_R14	22	1	1	1	1	1	0	0	0	0	0	0	0	0	0	0	0	0	0	0	0	0	0	0	0	0	0	0	0	0	0	0	0	0	0	0	0	0	0	0	0	0	0	0
LRWD1_HUMAN	sp|Q9UFC0|LRWD1_HUMAN Leucine-rich repeat and WD repeat-containing protein 1 OS=Homo sapiens OX=9606 GN=LRWD1 PE=1 SV=2	6.88394	70816	F215813.dat	Q25501_MS19-036_T2_NR6	22	2.2	1	1	1	4	0	0	0	0	1	0	0	0	0	0	0	0	0	0	0	0	0	0	0	0	0	0	0	0	0	0	0	0	0	0	0	0	0	0	0	1	0	0
SNUT1_HUMAN	sp|O43290|SNUT1_HUMAN U4/U6.U5 tri-snRNP-associated protein 1 OS=Homo sapiens OX=9606 GN=SART1 PE=1 SV=1	5.88818	90200	F215847.dat	Q25533_MS19-036_T2_R18	22	1	1	1	1	1	0	0	0	0	0	0	0	0	0	0	0	0	0	0	0	0	0	0	0	0	0	0	0	0	0	0	0	0	0	0	0	0	0	0	0	0	0	0
HIRP3_HUMAN	sp|Q9BW71|HIRP3_HUMAN HIRA-interacting protein 3 OS=Homo sapiens OX=9606 GN=HIRIP3 PE=1 SV=3	8.70953	61920	F215832.dat	Q25518_MS19-036_T3_R6	22	2.2	1	1	1	1	0	0	0	0	0	0	0	0	0	0	0	0	0	0	0	0	0	0	0	0	0	0	0	0	0	0	0	0	0	0	0	0	0	0	0	0	0	0
SHIP2_HUMAN	sp|O15357|SHIP2_HUMAN Phosphatidylinositol 3,4,5-trisphosphate 5-phosphatase 2 OS=Homo sapiens OX=9606 GN=INPPL1 PE=1 SV=2	6.10476	138513	F215818.dat	Q25504_MS19-036_T1(Baseline)_NR10	22	0.6	1	1	1	1	0	0	0	0	0	0	0	0	0	0	0	0	0	0	0	0	0	0	0	0	0	0	0	0	0	0	0	0	0	0	0	0	0	0	0	0	0	0
SAPC1_HUMAN	sp|Q5SSQ6|SAPC1_HUMAN Suppressor APC domain-containing protein 1 OS=Homo sapiens OX=9606 GN=SAPCD1 PE=2 SV=2	7.8754	16640	F215762.dat	Q25492_MS19-036_T3_R17	22	4.7	1	1	1	1	0	0	0	0	0	0	0	0	0	0	0	0	0	0	0	0	0	0	0	0	0	0	0	0	0	0	1	0	0	0	0	0	0	0	0	0	0	0
ZN607_HUMAN	sp|Q96SK3|ZN607_HUMAN Zinc finger protein 607 OS=Homo sapiens OX=9606 GN=ZNF607 PE=1 SV=3	8.92765	80454	F215823.dat	Q25509_MS19-036_T2_R2	22	1	1	1	1	1	0	0	0	0	0	0	0	0	0	0	0	0	0	0	0	0	0	0	0	0	0	0	0	0	0	0	0	0	0	0	0	0	0	0	0	0	0	0
P5F1B_HUMAN	sp|Q06416|P5F1B_HUMAN Putative POU domain, class 5, transcription factor 1B OS=Homo sapiens OX=9606 GN=POU5F1B PE=5 SV=2	6.26363	38563	F215832.dat	Q25518_MS19-036_T3_R6	22	2.5	1	1	1	1	0	0	0	0	0	0	0	0	0	0	0	0	0	0	0	0	0	0	0	0	0	0	0	0	0	0	0	0	0	0	0	0	0	0	0	0	0	0
DNM3L_HUMAN	sp|Q9UJW3|DNM3L_HUMAN DNA (cytosine-5)-methyltransferase 3-like OS=Homo sapiens OX=9606 GN=DNMT3L PE=1 SV=3	5.58797	43555	F215852.dat	Q25538_MS19-036_T3_R12	22	2.1	1	1	1	2	0	0	0	0	0	0	0	0	0	0	0	0	0	0	0	0	0	0	0	0	0	0	0	0	0	0	0	0	0	0	0	0	0	0	0	0	0	0
NPAS3_HUMAN	sp|Q8IXF0|NPAS3_HUMAN Neuronal PAS domain-containing protein 3 OS=Homo sapiens OX=9606 GN=NPAS3 PE=2 SV=1	6.16472	100743	F215691.dat	Q25482_MS19-036_T1(Baseline)_NR2	22	0.8	1	1	1	2	0	0	0	0	0	0	0	0	0	0	0	0	0	0	0	0	0	1	0	0	0	0	0	0	0	0	0	0	0	0	0	0	0	0	0	0	0	0
STF1_HUMAN	sp|Q13285|STF1_HUMAN Steroidogenic factor 1 OS=Homo sapiens OX=9606 GN=NR5A1 PE=1 SV=2	7.81094	51602	F215874.dat	Q25544_MS19-036_T4_NR8	22	1.5	1	1	1	1	0	0	0	0	0	0	0	0	0	0	0	0	0	0	0	0	0	0	0	0	0	0	0	0	0	0	0	0	0	0	0	0	0	0	0	0	0	0
SH24A_HUMAN	sp|Q9H788|SH24A_HUMAN SH2 domain-containing protein 4A OS=Homo sapiens OX=9606 GN=SH2D4A PE=1 SV=1	8.08851	52694	F215977.dat	Q25579_MS19-036_T1(Baseline)_R12	22	1.5	1	1	1	1	0	0	0	0	0	0	0	0	0	0	0	0	0	0	0	0	0	0	0	0	0	0	0	0	0	0	0	0	0	0	0	0	0	0	0	0	0	0
SOGA3_HUMAN	sp|Q5TF21|SOGA3_HUMAN Protein SOGA3 OS=Homo sapiens OX=9606 GN=SOGA3 PE=3 SV=1	5.80849	103136	F215838.dat	Q25524_MS19-036_T4_R3	22	1	1	1	1	1	0	0	0	0	0	0	0	0	0	0	0	0	0	0	0	0	0	0	0	0	0	0	0	0	0	0	0	0	0	0	0	0	0	0	0	0	0	0
CKAP5_HUMAN	sp|Q14008|CKAP5_HUMAN Cytoskeleton-associated protein 5 OS=Homo sapiens OX=9606 GN=CKAP5 PE=1 SV=3	7.9461	225352	F215835.dat	Q25521_MS19-036_T3_NR3	22	0.4	1	1	1	1	0	0	0	0	0	0	0	0	0	0	0	0	0	0	0	0	0	0	0	0	0	0	0	0	0	0	0	0	0	0	0	0	0	0	0	0	0	0
F200A_HUMAN	sp|Q8TCP9|F200A_HUMAN Protein FAM200A OS=Homo sapiens OX=9606 GN=FAM200A PE=1 SV=1	5.82275	66234	F215832.dat	Q25518_MS19-036_T3_R6	22	1.7	1	1	1	1	0	0	0	0	0	0	0	0	0	0	0	0	0	0	0	0	0	0	0	0	0	0	0	0	0	0	0	0	0	0	0	0	0	0	0	0	0	0
RX_HUMAN	sp|Q9Y2V3|RX_HUMAN Retinal homeobox protein Rx OS=Homo sapiens OX=9606 GN=RAX PE=1 SV=2	9.10911	36653	F215902.dat	Q25559_MS19-036_T4_NR7	22	3.8	1	1	1	1	0	0	0	0	0	0	0	0	0	0	0	0	0	0	0	0	0	0	0	0	0	0	0	0	0	0	0	0	0	0	0	0	0	0	0	0	0	0
CRUM2_HUMAN	sp|Q5IJ48|CRUM2_HUMAN Protein crumbs homolog 2 OS=Homo sapiens OX=9606 GN=CRB2 PE=1 SV=2	5.30913	134176	F215875.dat	Q25545_MS19-036_T3_NR13	22	0.7	1	1	1	1	0	0	0	0	0	0	0	0	0	0	0	0	0	0	0	0	0	0	0	0	0	0	0	0	0	0	0	0	0	0	0	0	0	0	0	0	0	0
NU153_HUMAN	sp|P49790|NU153_HUMAN Nuclear pore complex protein Nup153 OS=Homo sapiens OX=9606 GN=NUP153 PE=1 SV=2	8.97222	153843	F215850.dat	Q25536_MS19-036_T3_R15	22	0.5	1	1	1	1	0	0	0	0	0	0	0	0	0	0	0	0	0	0	0	0	0	0	0	0	0	0	0	0	0	0	0	0	0	0	0	0	0	0	0	0	0	0
PTPRM_HUMAN	sp|P28827|PTPRM_HUMAN Receptor-type tyrosine-protein phosphatase mu OS=Homo sapiens OX=9606 GN=PTPRM PE=1 SV=2	6.20649	163578	F215926.dat	Q25569_MS19-036_T4_NR10	22	0.6	1	1	1	2	0	0	0	0	0	0	0	0	0	0	0	0	0	0	0	0	0	0	0	0	0	0	0	0	0	0	0	0	0	0	0	0	0	0	0	0	0	0
TBCD1_HUMAN	sp|Q86TI0|TBCD1_HUMAN TBC1 domain family member 1 OS=Homo sapiens OX=9606 GN=TBC1D1 PE=1 SV=2	6.51533	133000	F215898.dat	Q25556_MS19-036_T2_NR1	22	0.6	1	1	1	4	0	0	0	0	0	0	0	0	0	0	0	0	0	0	0	0	0	0	0	0	0	0	0	0	0	0	0	0	0	0	0	0	0	0	0	0	0	0
BEND5_HUMAN	sp|Q7L4P6|BEND5_HUMAN BEN domain-containing protein 5 OS=Homo sapiens OX=9606 GN=BEND5 PE=1 SV=1	5.8752	48152	F215906.dat	Q25561_MS19-036_T4_NR2	22	1.7	1	1	1	1	0	0	0	0	0	0	0	0	0	0	0	0	0	0	0	0	0	0	0	0	0	0	0	0	0	0	0	0	0	0	0	0	0	0	0	0	0	0
TOPZ1_HUMAN	sp|Q8N9V7|TOPZ1_HUMAN Protein TOPAZ1 OS=Homo sapiens OX=9606 GN=TOPAZ1 PE=2 SV=3	8.15844	190806	F215815.dat	Q25502_MS19-036_T1(Baseline)_NR13	22	0.5	1	1	1	1	0	0	0	0	0	0	0	0	0	0	0	0	0	0	0	0	0	0	0	0	0	0	0	0	0	0	0	0	0	0	0	0	0	0	0	0	1	0
RPB1_HUMAN	sp|P24928|RPB1_HUMAN DNA-directed RNA polymerase II subunit RPB1 OS=Homo sapiens OX=9606 GN=POLR2A PE=1 SV=2	7.01551	217039	F215902.dat	Q25559_MS19-036_T4_NR7	22	0.7	1	1	1	1	0	0	0	0	0	0	0	0	0	0	0	0	0	0	0	0	0	0	0	0	0	0	0	0	0	0	0	0	0	0	0	0	0	0	0	0	0	0
RBFA_HUMAN	sp|Q8N0V3|RBFA_HUMAN Putative ribosome-binding factor A, mitochondrial OS=Homo sapiens OX=9606 GN=RBFA PE=1 SV=3	8.00688	38335	F215844.dat	Q25530_MS19-036_T1(Baseline)_R15	22	2	1	1	1	1	0	0	0	0	0	0	0	0	0	0	0	0	0	0	0	0	0	0	0	0	0	0	0	0	0	0	0	0	0	0	0	0	0	0	0	0	0	0
TALDO_HUMAN	sp|P37837|TALDO_HUMAN Transaldolase OS=Homo sapiens OX=9606 GN=TALDO1 PE=1 SV=2	6.35595	37516	F215885.dat	Q25550_MS19-036_T3_NR4	22	2.4	1	1	1	1	0	0	0	0	0	0	0	0	0	0	0	0	0	0	0	0	0	0	0	0	0	0	0	0	0	0	0	0	0	0	0	0	0	0	0	0	0	0
MSH5_HUMAN	sp|O43196|MSH5_HUMAN MutS protein homolog 5 OS=Homo sapiens OX=9606 GN=MSH5 PE=1 SV=1	5.94962	92816	F215862.dat	Q25539_MS19-036_T1(Baseline)_R1	22	1.2	1	1	1	1	0	0	0	0	0	0	0	0	0	0	0	0	0	0	0	0	0	0	0	0	0	0	0	0	0	0	0	0	0	0	0	0	0	0	0	0	0	0
NXF2_HUMAN	sp|Q9GZY0|NXF2_HUMAN Nuclear RNA export factor 2 OS=Homo sapiens OX=9606 GN=NXF2 PE=1 SV=1	7.74286	71581	F215822.dat	Q25508_MS19-036_T2_NR7	22	1.3	1	1	1	1	0	0	0	0	0	0	0	0	0	0	0	0	0	0	0	0	0	0	0	0	0	0	0	0	0	0	0	0	0	0	0	0	0	0	0	0	0	0
CFA65_HUMAN	sp|Q6ZU64|CFA65_HUMAN Cilia- and flagella-associated protein 65 OS=Homo sapiens OX=9606 GN=CFAP65 PE=1 SV=2	6.07287	217111	F215791.dat	Q25495_MS19-036_T4_NR16	22	0.5	1	1	1	4	0	0	0	0	0	0	0	0	0	0	0	0	1	0	0	0	0	0	0	0	0	0	0	0	0	0	0	0	0	1	0	0	0	0	0	0	0	0
DDX41_HUMAN	sp|Q9UJV9|DDX41_HUMAN Probable ATP-dependent RNA helicase DDX41 OS=Homo sapiens OX=9606 GN=DDX41 PE=1 SV=2	6.39751	69793	F215704.dat	Q25483_MS19-036_T4_R17	22	1.1	1	1	1	1	0	0	0	0	0	0	0	0	0	0	0	0	0	0	0	0	0	0	1	0	0	0	0	0	0	0	0	0	0	0	0	0	0	0	0	0	0	0
RAX2_HUMAN	sp|Q96IS3|RAX2_HUMAN Retina and anterior neural fold homeobox protein 2 OS=Homo sapiens OX=9606 GN=RAX2 PE=1 SV=1	9.44505	20073	F215902.dat	Q25559_MS19-036_T4_NR7	22	7.1	1	1	1	1	0	0	0	0	0	0	0	0	0	0	0	0	0	0	0	0	0	0	0	0	0	0	0	0	0	0	0	0	0	0	0	0	0	0	0	0	0	0
AICDA_HUMAN	sp|Q9GZX7|AICDA_HUMAN Single-stranded DNA cytosine deaminase OS=Homo sapiens OX=9606 GN=AICDA PE=1 SV=1	9.50358	23938	F215684.dat	Q25476_MS19-036_T3_R2	22	3.5	1	1	1	1	0	0	0	0	0	0	0	0	0	0	0	1	0	0	0	0	0	0	0	0	0	0	0	0	0	0	0	0	0	0	0	0	0	0	0	0	0	0
CFA46_HUMAN	sp|Q8IYW2|CFA46_HUMAN Cilia- and flagella-associated protein 46 OS=Homo sapiens OX=9606 GN=CFAP46 PE=2 SV=3	7.07062	303308	F215875.dat	Q25545_MS19-036_T3_NR13	22	0.3	1	1	1	1	0	0	0	0	0	0	0	0	0	0	0	0	0	0	0	0	0	0	0	0	0	0	0	0	0	0	0	0	0	0	0	0	0	0	0	0	0	0
EFS_HUMAN	sp|O43281|EFS_HUMAN Embryonal Fyn-associated substrate OS=Homo sapiens OX=9606 GN=EFS PE=1 SV=1	4.97753	58779	F215704.dat	Q25483_MS19-036_T4_R17	22	1.2	1	1	1	2	0	0	0	0	0	0	0	0	0	0	0	0	0	0	0	0	0	0	1	0	0	0	0	0	0	0	0	0	0	0	0	0	0	0	0	0	0	0
RHBL4_HUMAN	sp|Q8TEB9|RHBL4_HUMAN Rhomboid-related protein 4 OS=Homo sapiens OX=9606 GN=RHBDD1 PE=1 SV=1	8.46534	35800	F215821.dat	Q25507_MS19-036_T3_NR1	22	2.9	1	1	1	3	0	0	0	0	0	0	0	0	0	0	0	0	0	0	0	0	0	0	0	0	0	0	0	0	0	0	0	0	0	0	0	0	0	0	0	0	0	0
SIL2A_HUMAN	sp|P0DMW4|SIL2A_HUMAN Small integral membrane protein 10-like protein 2A OS=Homo sapiens OX=9606 GN=SMIM10L2A PE=4 SV=1	11.2538	8383	F215925.dat	Q25568_MS19-036_T4_NR6	22	10.3	1	1	1	1	0	0	0	0	0	0	0	0	0	0	0	0	0	0	0	0	0	0	0	0	0	0	0	0	0	0	0	0	0	0	0	0	0	0	0	0	0	0
DYH14_HUMAN	sp|Q0VDD8|DYH14_HUMAN Dynein heavy chain 14, axonemal OS=Homo sapiens OX=9606 GN=DNAH14 PE=2 SV=3	6.51728	399640	F215761.dat	Q25491_MS19-036_T2_R3	22	0.2	1	1	1	2	0	0	0	0	0	0	0	0	0	0	0	0	0	0	0	0	0	0	0	0	0	0	0	1	0	1	0	0	0	0	0	0	0	0	0	0	0	0
RHBT2_HUMAN	sp|Q9BYZ6|RHBT2_HUMAN Rho-related BTB domain-containing protein 2 OS=Homo sapiens OX=9606 GN=RHOBTB2 PE=1 SV=2	6.26742	82573	F215812.dat	Q25500_MS19-036_T1(Baseline)_R2	22	1	1	1	1	1	0	0	0	0	0	0	0	0	0	0	0	0	0	0	0	0	0	0	0	0	0	0	0	0	0	0	0	0	0	0	0	0	0	0	1	0	0	0
MTUS1_HUMAN	sp|Q9ULD2|MTUS1_HUMAN Microtubule-associated tumor suppressor 1 OS=Homo sapiens OX=9606 GN=MTUS1 PE=1 SV=2	7.333	141309	F215704.dat	Q25483_MS19-036_T4_R17	22	1.3	1	1	1	1	0	0	0	0	0	0	0	0	0	0	0	0	0	0	0	0	0	0	1	0	0	0	0	0	0	0	0	0	0	0	0	0	0	0	0	0	0	0
PIDD1_HUMAN	sp|Q9HB75|PIDD1_HUMAN p53-induced death domain-containing protein 1 OS=Homo sapiens OX=9606 GN=PIDD1 PE=1 SV=2	6.00749	99649	F215852.dat	Q25538_MS19-036_T3_R12	22	0.8	1	1	1	1	0	0	0	0	0	0	0	0	0	0	0	0	0	0	0	0	0	0	0	0	0	0	0	0	0	0	0	0	0	0	0	0	0	0	0	0	0	0
DGKI_HUMAN	sp|O75912|DGKI_HUMAN Diacylglycerol kinase iota OS=Homo sapiens OX=9606 GN=DGKI PE=1 SV=1	7.97682	116923	F215849.dat	Q25535_MS19-036_T2_R10	22	0.8	1	1	1	2	0	0	0	0	0	0	0	0	0	0	0	0	0	0	0	0	0	0	0	0	0	0	0	0	0	0	0	0	0	0	0	0	0	0	0	0	0	0
MID51_HUMAN	sp|Q9NQG6|MID51_HUMAN Mitochondrial dynamics protein MID51 OS=Homo sapiens OX=9606 GN=MIEF1 PE=1 SV=1	7.55372	51261	F215820.dat	Q25506_MS19-036_T4_R4	22	1.5	1	1	1	2	0	0	0	0	0	0	0	0	0	0	0	0	0	0	0	0	0	0	0	0	0	0	0	0	0	0	0	0	0	0	0	0	0	0	0	0	0	0
BNIP3_HUMAN	sp|Q12983|BNIP3_HUMAN BCL2/adenovirus E1B 19 kDa protein-interacting protein 3 OS=Homo sapiens OX=9606 GN=BNIP3 PE=1 SV=3	6.6625	27815	F215921.dat	Q25564_MS19-036_T4_R6	22	3.5	1	1	1	4	0	0	0	0	0	0	0	0	0	0	1	0	0	0	0	0	0	0	0	0	0	0	0	0	0	0	0	0	0	0	0	0	0	0	0	0	0	0
MTA2_HUMAN	sp|O94776|MTA2_HUMAN Metastasis-associated protein MTA2 OS=Homo sapiens OX=9606 GN=MTA2 PE=1 SV=1	9.69634	74976	F215894.dat	Q25552_MS19-036_T3_NR5	22	1	1	1	1	1	0	0	0	0	0	0	0	0	0	0	0	0	0	0	0	0	0	0	0	0	0	0	0	0	0	0	0	0	0	0	0	0	0	0	0	0	0	0
DCAF1_HUMAN	sp|Q9Y4B6|DCAF1_HUMAN DDB1- and CUL4-associated factor 1 OS=Homo sapiens OX=9606 GN=DCAF1 PE=1 SV=3	4.91992	168900	F215686.dat	Q25478_MS19-036_T3_NR2	22	0.5	1	1	1	7	0	0	0	0	0	0	0	0	0	0	0	0	0	1	0	0	0	1	0	0	1	0	0	0	0	0	0	0	1	0	0	0	0	0	0	0	0	0
WRN_HUMAN	sp|Q14191|WRN_HUMAN Werner syndrome ATP-dependent helicase OS=Homo sapiens OX=9606 GN=WRN PE=1 SV=2	5.95714	162357	F215983.dat	Q25583_MS19-036_T4_NR3	21	0.5	1	1	1	1	0	0	0	0	0	0	0	0	0	0	0	0	0	0	0	0	0	0	0	0	0	0	0	0	0	0	0	0	0	0	0	0	0	0	0	0	0	0
MACF1_HUMAN	sp|Q9UPN3|MACF1_HUMAN Microtubule-actin cross-linking factor 1, isoforms 1/2/3/5 OS=Homo sapiens OX=9606 GN=MACF1 PE=1 SV=4	5.27549	837787	F215685.dat	Q25477_MS19-036_T4_NR18	21	0.1	1	1	1	0	0	0	0	0	0	0	0	0	0	0	0	0	0	0	0	0	0	0	0	0	0	0	0	0	0	0	0	0	0	0	0	0	0	0	0	0	0	0
CO7A1_HUMAN	sp|Q02388|CO7A1_HUMAN Collagen alpha-1(VII) chain OS=Homo sapiens OX=9606 GN=COL7A1 PE=1 SV=2	5.94845	295041	F215808.dat	Q25497_MS19-036_T4_NR15	21	0.3	1	1	1	1	0	0	0	0	0	0	0	0	0	0	0	0	0	0	0	0	0	0	0	0	0	0	0	0	0	0	0	0	0	0	0	1	0	0	0	0	0	0
KIBRA_HUMAN	sp|Q8IX03|KIBRA_HUMAN Protein KIBRA OS=Homo sapiens OX=9606 GN=WWC1 PE=1 SV=1	5.64854	125223	F215820.dat	Q25506_MS19-036_T4_R4	21	0.9	1	1	1	1	0	0	0	0	0	0	0	0	0	0	0	0	0	0	0	0	0	0	0	0	0	0	0	0	0	0	0	0	0	0	0	0	0	0	0	0	0	0
FRIL_HUMAN	sp|P02792|FRIL_HUMAN Ferritin light chain OS=Homo sapiens OX=9606 GN=FTL PE=1 SV=2	5.51176	20007	F215977.dat	Q25579_MS19-036_T1(Baseline)_R12	21	4	1	1	1	1	0	0	0	0	0	0	0	0	0	0	0	0	0	0	0	0	0	0	0	0	0	0	0	0	0	0	0	0	0	0	0	0	0	0	0	0	0	0
CPSF1_HUMAN	sp|Q10570|CPSF1_HUMAN Cleavage and polyadenylation specificity factor subunit 1 OS=Homo sapiens OX=9606 GN=CPSF1 PE=1 SV=2	5.98827	160782	F215820.dat	Q25506_MS19-036_T4_R4	21	0.5	1	1	1	1	0	0	0	0	0	0	0	0	0	0	0	0	0	0	0	0	0	0	0	0	0	0	0	0	0	0	0	0	0	0	0	0	0	0	0	0	0	0
SYT14_HUMAN	sp|Q8NB59|SYT14_HUMAN Synaptotagmin-14 OS=Homo sapiens OX=9606 GN=SYT14 PE=1 SV=2	6.01873	62247	F215832.dat	Q25518_MS19-036_T3_R6	21	1.4	1	1	1	1	0	0	0	0	0	0	0	0	0	0	0	0	0	0	0	0	0	0	0	0	0	0	0	0	0	0	0	0	0	0	0	0	0	0	0	0	0	0
CC168_HUMAN	sp|Q8NDH2|CC168_HUMAN Coiled-coil domain-containing protein 168 OS=Homo sapiens OX=9606 GN=CCDC168 PE=2 SV=2	9.35335	277778	F215831.dat	Q25517_MS19-036_T2_R4	21	0.3	1	1	1	1	0	0	0	0	0	0	0	0	0	0	0	0	0	0	0	0	0	0	0	0	0	0	0	0	0	0	0	0	0	0	0	0	0	0	0	0	0	0
MCM5_HUMAN	sp|P33992|MCM5_HUMAN DNA replication licensing factor MCM5 OS=Homo sapiens OX=9606 GN=MCM5 PE=1 SV=5	8.64129	82233	F215842.dat	Q25528_MS19-036_T1(Baseline)_R4	21	1.2	1	1	1	7	0	0	0	0	0	0	0	0	0	0	0	0	0	0	0	0	0	0	0	0	0	0	0	0	0	0	0	0	0	0	0	0	0	0	0	0	0	0
UGDH_HUMAN	sp|O60701|UGDH_HUMAN UDP-glucose 6-dehydrogenase OS=Homo sapiens OX=9606 GN=UGDH PE=1 SV=1	6.73064	54989	F215969.dat	Q25575_MS19-036_T4_R2	21	2.4	1	1	1	1	0	0	0	0	0	0	0	0	0	0	0	0	0	0	0	0	0	0	0	0	0	0	0	0	0	0	0	0	0	0	0	0	0	0	0	0	0	0
RHG07_HUMAN	sp|Q96QB1|RHG07_HUMAN Rho GTPase-activating protein 7 OS=Homo sapiens OX=9606 GN=DLC1 PE=1 SV=4	5.98387	170485	F215845.dat	Q25531_MS19-036_T3_R10	21	0.7	1	1	1	1	0	0	0	0	0	0	0	0	0	0	0	0	0	0	0	0	0	0	0	0	0	0	0	0	0	0	0	0	0	0	0	0	0	0	0	0	0	0
TGM1_HUMAN	sp|P22735|TGM1_HUMAN Protein-glutamine gamma-glutamyltransferase K OS=Homo sapiens OX=9606 GN=TGM1 PE=1 SV=4	5.67656	89730	F215851.dat	Q25537_MS19-036_T3_R9	21	1.3	1	1	1	1	0	0	0	0	0	0	0	0	0	0	0	0	0	0	0	0	0	0	0	0	0	0	0	0	0	0	0	0	0	0	0	0	0	0	0	0	0	0
LRMP_HUMAN	sp|Q12912|LRMP_HUMAN Lymphoid-restricted membrane protein OS=Homo sapiens OX=9606 GN=LRMP PE=1 SV=3	5.61925	62083	F215975.dat	Q25578_MS19-036_T3_NR14	21	1.4	1	1	1	1	0	0	0	0	0	0	0	0	0	0	0	0	0	0	0	0	0	0	0	0	0	0	0	0	0	0	0	0	0	0	0	0	0	0	0	0	0	0
CXCR3_HUMAN	sp|P49682|CXCR3_HUMAN C-X-C chemokine receptor type 3 OS=Homo sapiens OX=9606 GN=CXCR3 PE=1 SV=2	7.92197	40633	F215828.dat	Q25514_MS19-036_T4_R9	21	1.9	1	1	1	1	0	0	0	0	0	0	0	0	0	0	0	0	0	0	0	0	0	0	0	0	0	0	0	0	0	0	0	0	0	0	0	0	0	0	0	0	0	0
PXDN_HUMAN	sp|Q92626|PXDN_HUMAN Peroxidasin homolog OS=Homo sapiens OX=9606 GN=PXDN PE=1 SV=2	6.78758	165170	F215875.dat	Q25545_MS19-036_T3_NR13	21	0.5	1	1	1	1	0	0	0	0	0	0	0	0	0	0	0	0	0	0	0	0	0	0	0	0	0	0	0	0	0	0	0	0	0	0	0	0	0	0	0	0	0	0
SPTB2_HUMAN	sp|Q01082|SPTB2_HUMAN Spectrin beta chain, non-erythrocytic 1 OS=Homo sapiens OX=9606 GN=SPTBN1 PE=1 SV=2	5.3924	274439	F215973.dat	Q25577_MS19-036_T4_R15	21	0.6	1	1	1	0	0	0	0	0	0	0	0	0	0	0	0	0	0	0	0	0	0	0	0	0	0	0	0	0	0	0	0	0	0	0	0	0	0	0	0	0	0	0
NOL4L_HUMAN	sp|Q96MY1|NOL4L_HUMAN Nucleolar protein 4-like OS=Homo sapiens OX=9606 GN=NOL4L PE=1 SV=2	4.92059	47185	F215982.dat	Q25582_MS19-036_T2_NR8	21	1.6	1	1	1	1	0	0	0	0	0	0	0	0	0	0	0	0	0	0	0	0	0	0	0	0	0	0	0	0	0	0	0	0	0	0	0	0	0	0	0	0	0	0
LRRN1_HUMAN	sp|Q6UXK5|LRRN1_HUMAN Leucine-rich repeat neuronal protein 1 OS=Homo sapiens OX=9606 GN=LRRN1 PE=1 SV=1	5.76698	80665	F215810.dat	Q25499_MS19-036_T2_R15	21	1.1	1	1	1	1	0	0	0	0	0	0	0	0	0	0	0	0	0	0	0	0	0	0	0	0	0	0	0	0	0	0	0	0	0	0	0	0	0	1	0	0	0	0
NPAT_HUMAN	sp|Q14207|NPAT_HUMAN Protein NPAT OS=Homo sapiens OX=9606 GN=NPAT PE=1 SV=3	5.62932	154195	F215972.dat	Q25576_MS19-036_T4_R13	21	0.5	1	1	1	2	0	0	0	0	0	0	0	0	0	0	0	0	0	0	0	0	0	0	0	0	0	0	0	0	0	0	0	0	0	0	0	0	0	0	0	0	0	0
AGAP3_HUMAN	sp|Q96P47|AGAP3_HUMAN Arf-GAP with GTPase, ANK repeat and PH domain-containing protein 3 OS=Homo sapiens OX=9606 GN=AGAP3 PE=1 SV=2	8.21671	94985	F215868.dat	Q25541_MS19-036_T1(Baseline)_NR3	21	0.8	1	1	1	1	0	0	0	0	0	0	0	0	0	0	0	0	0	0	0	0	0	0	0	0	0	0	0	0	0	0	0	0	0	0	0	0	0	0	0	0	0	0
DUOX2_HUMAN	sp|Q9NRD8|DUOX2_HUMAN Dual oxidase 2 OS=Homo sapiens OX=9606 GN=DUOX2 PE=1 SV=2	8.01996	175253	F215846.dat	Q25532_MS19-036_T2_NR18	21	0.6	1	1	1	1	0	0	0	0	0	0	0	0	0	0	0	0	0	0	0	0	0	0	0	0	0	0	0	0	0	0	0	0	0	0	0	0	0	0	0	0	0	0
DOA_HUMAN	sp|P06340|DOA_HUMAN HLA class II histocompatibility antigen, DO alpha chain OS=Homo sapiens OX=9606 GN=HLA-DOA PE=1 SV=1	5.56998	27581	F215820.dat	Q25506_MS19-036_T4_R4	21	3.2	1	1	1	1	0	0	0	0	0	0	0	0	0	0	0	0	0	0	0	0	0	0	0	0	0	0	0	0	0	0	0	0	0	0	0	0	0	0	0	0	0	0
RINI_HUMAN	sp|P13489|RINI_HUMAN Ribonuclease inhibitor OS=Homo sapiens OX=9606 GN=RNH1 PE=1 SV=2	4.71218	49941	F215808.dat	Q25497_MS19-036_T4_NR15	21	1.5	1	1	1	4	0	0	0	0	0	0	0	0	0	0	0	0	0	0	0	0	0	0	0	0	0	0	0	0	0	0	0	0	0	0	0	1	0	0	0	0	0	0
RBM10_HUMAN	sp|P98175|RBM10_HUMAN RNA-binding protein 10 OS=Homo sapiens OX=9606 GN=RBM10 PE=1 SV=3	5.68836	103469	F215977.dat	Q25579_MS19-036_T1(Baseline)_R12	21	1	1	1	1	1	0	0	0	0	0	0	0	0	0	0	0	0	0	0	0	0	0	0	0	0	0	0	0	0	0	0	0	0	0	0	0	0	0	0	0	0	0	0
VASH1_HUMAN	sp|Q7L8A9|VASH1_HUMAN Tubulinyl-Tyr carboxypeptidase 1 OS=Homo sapiens OX=9606 GN=VASH1 PE=1 SV=1	9.49837	40931	F215828.dat	Q25514_MS19-036_T4_R9	21	2.2	1	1	1	1	0	0	0	0	0	0	0	0	0	0	0	0	0	0	0	0	0	0	0	0	0	0	0	0	0	0	0	0	0	0	0	0	0	0	0	0	0	0
ZMYM4_HUMAN	sp|Q5VZL5|ZMYM4_HUMAN Zinc finger MYM-type protein 4 OS=Homo sapiens OX=9606 GN=ZMYM4 PE=1 SV=1	6.45527	172677	F215875.dat	Q25545_MS19-036_T3_NR13	20	0.5	1	1	1	1	0	0	0	0	0	0	0	0	0	0	0	0	0	0	0	0	0	0	0	0	0	0	0	0	0	0	0	0	0	0	0	0	0	0	0	0	0	0
HELZ2_HUMAN	sp|Q9BYK8|HELZ2_HUMAN Helicase with zinc finger domain 2 OS=Homo sapiens OX=9606 GN=HELZ2 PE=1 SV=6	7.35565	294465	F215683.dat	Q25475_MS19-036_T3_R3	20	0.3	1	1	1	1	0	0	0	0	0	0	0	0	0	0	1	0	0	0	0	0	0	0	0	0	0	0	0	0	0	0	0	0	0	0	0	0	0	0	0	0	0	0
ANK2_HUMAN	sp|Q01484|ANK2_HUMAN Ankyrin-2 OS=Homo sapiens OX=9606 GN=ANK2 PE=1 SV=4	5.03069	433448	F215673.dat	Q25472_MS19-036_T1(Baseline)_R5	20	0.2	1	1	1	1	0	0	0	0	0	0	0	1	0	0	0	0	0	0	0	0	0	0	0	0	0	0	0	0	0	0	0	0	0	0	0	0	0	0	0	0	0	0
TF3C1_HUMAN	sp|Q12789|TF3C1_HUMAN General transcription factor 3C polypeptide 1 OS=Homo sapiens OX=9606 GN=GTF3C1 PE=1 SV=4	7.01086	238724	F215888.dat	Q25551_MS19-036_T4_R5	20	0.5	1	1	1	1	0	0	0	0	0	0	0	0	0	0	0	0	0	0	0	0	0	0	0	0	0	0	0	0	0	0	0	0	0	0	0	0	0	0	0	0	0	0
CBPC1_HUMAN	sp|Q9UPW5|CBPC1_HUMAN Cytosolic carboxypeptidase 1 OS=Homo sapiens OX=9606 GN=AGTPBP1 PE=1 SV=3	5.78452	138361	F215821.dat	Q25507_MS19-036_T3_NR1	20	0.6	1	1	1	6	0	0	0	0	0	0	0	0	0	0	0	0	0	0	0	0	0	0	0	0	0	0	0	0	0	0	0	0	0	0	0	0	0	0	0	0	0	0
Z804B_HUMAN	sp|A4D1E1|Z804B_HUMAN Zinc finger protein 804B OS=Homo sapiens OX=9606 GN=ZNF804B PE=2 SV=2	8.84172	152477	F215828.dat	Q25514_MS19-036_T4_R9	19	0.6	1	1	1	2	0	0	0	0	0	0	0	0	0	0	0	0	0	0	0	0	0	0	0	0	0	0	0	0	0	0	0	0	0	0	0	0	0	0	0	0	0	0
DYH9_HUMAN	sp|Q9NYC9|DYH9_HUMAN Dynein heavy chain 9, axonemal OS=Homo sapiens OX=9606 GN=DNAH9 PE=1 SV=3	5.64287	511551	F215969.dat	Q25575_MS19-036_T4_R2	18	0.2	1	1	1	2	0	0	0	0	0	0	0	0	0	0	0	0	0	0	0	0	0	0	0	0	0	0	0	0	0	0	0	0	0	0	0	0	0	0	0	0	0	0
TRNK1_HUMAN	sp|O15050|TRNK1_HUMAN TPR and ankyrin repeat-containing protein 1 OS=Homo sapiens OX=9606 GN=TRANK1 PE=2 SV=4	6.34154	336007	F215875.dat	Q25545_MS19-036_T3_NR13	17	0.3	1	1	1	1	0	0	0	0	0	0	0	0	0	0	0	0	0	0	0	0	0	0	0	0	0	0	0	0	0	0	0	0	0	0	0	0	0	0	0	0	0	0
DYHC2_HUMAN	sp|Q8NCM8|DYHC2_HUMAN Cytoplasmic dynein 2 heavy chain 1 OS=Homo sapiens OX=9606 GN=DYNC2H1 PE=1 SV=4	6.12582	492311	F215977.dat	Q25579_MS19-036_T1(Baseline)_R12	17	0.2	1	1	1	1	0	0	0	0	0	0	0	0	0	0	0	0	0	0	0	0	0	0	0	0	0	0	0	0	0	0	0	0	0	0	0	0	0	0	0	0	0	0
SCHI1_HUMAN	sp|P0DPB3|SCHI1_HUMAN Schwannomin-interacting protein 1 OS=Homo sapiens OX=9606 GN=SCHIP1 PE=1 SV=1	4.9804	53447	F215838.dat	Q25524_MS19-036_T4_R3	17	3.7	1	1	1	1	0	0	0	0	0	0	0	0	0	0	0	0	0	0	0	0	0	0	0	0	0	0	0	0	0	0	0	0	0	0	0	0	0	0	0	0	0	0
UBP33_HUMAN	sp|Q8TEY7|UBP33_HUMAN Ubiquitin carboxyl-terminal hydrolase 33 OS=Homo sapiens OX=9606 GN=USP33 PE=1 SV=2	5.6879	106659	F215817.dat	Q25503_MS19-036_T2_NR10	16	0.7	1	1	1	1	0	0	0	0	0	0	0	0	0	0	0	0	0	0	0	0	0	0	0	0	0	0	0	0	0	0	0	0	0	0	0	0	0	0	0	0	0	1
PLXA4_HUMAN	sp|Q9HCM2|PLXA4_HUMAN Plexin-A4 OS=Homo sapiens OX=9606 GN=PLXNA4 PE=1 SV=4	6.42215	212318	F215670.dat	Q25469_MS19-036_T2_R1	16	0.6	1	1	1	1	0	0	0	0	1	0	0	0	0	0	0	0	0	0	0	0	0	0	0	0	0	0	0	0	0	0	0	0	0	0	0	0	0	0	0	0	0	0
ATF6B_HUMAN	sp|Q99941|ATF6B_HUMAN Cyclic AMP-dependent transcription factor ATF-6 beta OS=Homo sapiens OX=9606 GN=ATF6B PE=1 SV=2	5.90449	76661	F215947.dat	Q25572_MS19-036_T4_R10	16	1	1	1	1	1	0	0	0	0	0	0	0	0	0	0	0	0	0	0	0	0	0	0	0	0	0	0	0	0	0	0	0	0	0	0	0	0	0	0	0	0	0	0
FARP2_HUMAN	sp|O94887|FARP2_HUMAN FERM, ARHGEF and pleckstrin domain-containing protein 2 OS=Homo sapiens OX=9606 GN=FARP2 PE=1 SV=3	8.9599	119813	F215844.dat	Q25530_MS19-036_T1(Baseline)_R15	15	0.8	1	1	1	1	0	0	0	0	0	0	0	0	0	0	0	0	0	0	0	0	0	0	0	0	0	0	0	0	0	0	0	0	0	0	0	0	0	0	0	0	0	0
K2C6C_HUMAN	sp|P48668|K2C6C_HUMAN Keratin, type II cytoskeletal 6C OS=Homo sapiens OX=9606 GN=KRT6C PE=1 SV=3	8.09055	59988	F215868.dat	Q25541_MS19-036_T1(Baseline)_NR3	2473	58.3	41	0	45	0	0	0	0	0	0	0	0	0	0	0	0	0	0	0	0	0	0	0	0	0	0	0	0	0	0	0	0	0	0	0	0	0	0	0	0	0	0	0
KR87P_HUMAN	sp|A6NCN2|KR87P_HUMAN Putative keratin-87 protein OS=Homo sapiens OX=9606 GN=KRT87P PE=5 SV=4	5.63771	29099	F215921.dat	Q25564_MS19-036_T4_R6	1804	71.4	28	0	31	9	0	0	0	0	0	0	0	0	0	0	0	0	0	0	0	0	0	6	0	0	0	0	0	0	0	0	0	0	0	0	0	0	0	0	0	0	0	0
K2C75_HUMAN	sp|O95678|K2C75_HUMAN Keratin, type II cytoskeletal 75 OS=Homo sapiens OX=9606 GN=KRT75 PE=1 SV=2	7.60464	59524	F215868.dat	Q25541_MS19-036_T1(Baseline)_NR3	979	20.5	17	0	21	34	0	0	0	0	0	0	0	0	0	0	0	0	0	0	0	0	0	5	0	0	0	0	0	0	0	0	0	0	0	0	0	0	0	0	0	0	0	0
K2C3_HUMAN	sp|P12035|K2C3_HUMAN Keratin, type II cytoskeletal 3 OS=Homo sapiens OX=9606 GN=KRT3 PE=1 SV=3	6.11683	64378	F215868.dat	Q25541_MS19-036_T1(Baseline)_NR3	780	11.3	13	0	18	23	1	0	1	1	0	0	0	0	1	0	1	2	1	0	1	0	0	0	0	0	1	1	0	0	1	1	0	1	0	0	0	0	0	0	0	0	0	0
K22O_HUMAN	sp|Q01546|K22O_HUMAN Keratin, type II cytoskeletal 2 oral OS=Homo sapiens OX=9606 GN=KRT76 PE=1 SV=2	8.37916	65800	F215868.dat	Q25541_MS19-036_T1(Baseline)_NR3	816	11.9	14	0	17	1	0	0	0	0	0	1	0	0	0	0	0	0	0	0	0	0	0	0	0	0	0	0	0	0	0	0	0	0	0	0	0	0	0	0	0	0	0	0
K2C7_HUMAN	sp|P08729|K2C7_HUMAN Keratin, type II cytoskeletal 7 OS=Homo sapiens OX=9606 GN=KRT7 PE=1 SV=5	5.40303	51354	F215691.dat	Q25482_MS19-036_T1(Baseline)_NR2	377	10.4	8	0	14	8	2	2	0	0	0	0	0	0	0	2	1	0	0	1	0	0	0	0	0	0	0	0	0	0	0	0	0	0	0	0	0	0	0	0	0	0	0	0
KRT84_HUMAN	sp|Q9NSB2|KRT84_HUMAN Keratin, type II cuticular Hb4 OS=Homo sapiens OX=9606 GN=KRT84 PE=2 SV=2	7.7447	64801	F215691.dat	Q25482_MS19-036_T1(Baseline)_NR2	377	6.3	8	0	12	3	0	0	0	0	0	0	0	0	0	0	0	0	0	0	0	0	0	0	0	0	0	0	0	0	0	0	0	0	0	0	0	0	0	0	0	0	0	0
K1C15_HUMAN	sp|P19012|K1C15_HUMAN Keratin, type I cytoskeletal 15 OS=Homo sapiens OX=9606 GN=KRT15 PE=1 SV=3	4.71009	49181	F215818.dat	Q25504_MS19-036_T1(Baseline)_NR10	366	13.2	7	0	11	0	0	0	0	0	0	0	0	0	0	0	0	0	0	0	0	0	0	0	0	0	0	0	0	0	0	0	0	0	0	0	0	0	0	0	0	0	0	0
KRT37_HUMAN	sp|O76014|KRT37_HUMAN Keratin, type I cuticular Ha7 OS=Homo sapiens OX=9606 GN=KRT37 PE=3 SV=3	4.90229	49715	F215975.dat	Q25578_MS19-036_T3_NR14	271	8.7	5	0	11	0	0	0	0	0	0	0	0	0	0	0	0	0	0	0	0	0	0	0	0	0	0	0	0	0	0	0	0	0	0	0	0	0	0	0	0	0	0	0
IGHG4_HUMAN	sp|P01861|IGHG4_HUMAN Immunoglobulin heavy constant gamma 4 OS=Homo sapiens OX=9606 GN=IGHG4 PE=1 SV=1	7.17628	35918	F215685.dat	Q25477_MS19-036_T4_NR18	364	25.7	7	0	9	0	0	0	0	0	0	0	0	0	0	0	0	0	0	0	0	0	0	0	0	0	0	0	0	0	0	0	0	0	0	0	0	0	0	0	0	0	0	0
K1C19_HUMAN	sp|P08727|K1C19_HUMAN Keratin, type I cytoskeletal 19 OS=Homo sapiens OX=9606 GN=KRT19 PE=1 SV=4	5.04526	44079	F215868.dat	Q25541_MS19-036_T1(Baseline)_NR3	304	12.2	6	0	9	0	0	0	0	0	0	0	0	0	0	0	0	0	0	0	0	0	0	0	0	0	0	0	0	0	0	0	0	0	0	0	0	0	0	0	0	0	0	0
K2C72_HUMAN	sp|Q14CN4|K2C72_HUMAN Keratin, type II cytoskeletal 72 OS=Homo sapiens OX=9606 GN=KRT72 PE=1 SV=2	6.5344	55842	F215868.dat	Q25541_MS19-036_T1(Baseline)_NR3	305	9	5	0	7	0	0	0	0	0	0	0	0	0	0	0	0	0	0	0	0	0	0	0	0	0	0	0	0	0	0	0	0	0	0	0	0	0	0	0	0	0	0	0
IGA2_HUMAN	sp|P0DOX2|IGA2_HUMAN Immunoglobulin alpha-2 heavy chain OS=Homo sapiens OX=9606 PE=1 SV=2	6.23465	48903	F215906.dat	Q25561_MS19-036_T4_NR2	75	3.1	2	0	6	0	0	0	0	0	0	0	0	0	0	0	0	0	0	0	0	0	0	0	0	0	0	0	0	0	0	0	0	0	0	0	0	0	0	0	0	0	0	0
K1C23_HUMAN	sp|Q9C075|K1C23_HUMAN Keratin, type I cytoskeletal 23 OS=Homo sapiens OX=9606 GN=KRT23 PE=1 SV=2	6.09469	48101	F215691.dat	Q25482_MS19-036_T1(Baseline)_NR2	118	4.3	3	0	3	0	0	0	0	0	0	0	0	0	0	0	0	0	0	0	0	0	0	0	0	0	0	0	0	0	0	0	0	0	0	0	0	0	0	0	0	0	0	0
K1C12_HUMAN	sp|Q99456|K1C12_HUMAN Keratin, type I cytoskeletal 12 OS=Homo sapiens OX=9606 GN=KRT12 PE=1 SV=1	4.70503	53478	F215818.dat	Q25504_MS19-036_T1(Baseline)_NR10	112	5.7	2	0	2	0	0	0	0	0	0	0	0	0	0	0	0	0	0	0	0	0	0	0	0	0	0	0	0	0	0	0	0	0	0	0	0	0	0	0	0	0	0	0
KR412_HUMAN	sp|Q9BQ66|KR412_HUMAN Keratin-associated protein 4-12 OS=Homo sapiens OX=9606 GN=KRTAP4-12 PE=1 SV=1	8.36868	21390	F215921.dat	Q25564_MS19-036_T4_R6	45	29.4	2	0	2	0	0	0	0	0	0	0	0	0	0	0	0	0	0	0	0	0	0	0	0	0	0	0	0	0	0	0	0	0	0	0	0	0	0	0	0	0	0	0
[truncated: 196 more columns]
